# Supplementary material for: Bovine Peripheral Blood Derived Lymphocyte Proteome and Secretome Show Divergent Reaction of Bovine Immune Phenotypes after Stimulation with Pokeweed Mitogen
Source: MDPI journal article supplement (doi:10.3390/proteomes10010007), 2022-02-08
Supplement: s1 [file s1]

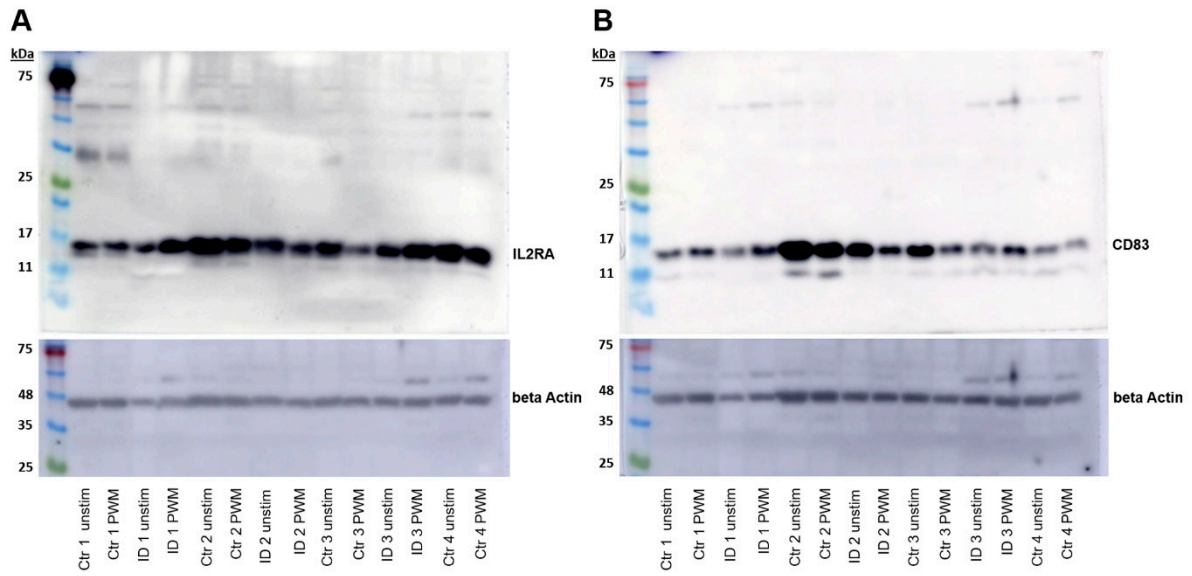

**Figure S1.** Representative western blots of bovine PBMC lysate for IL2RA (A) and CD83 (B). Reincubation with beta Actin (A and B) was performed for normalization.
