# Supplementary material for: Bovine Peripheral Blood Derived Lymphocyte Proteome and Secretome Show Divergent Reaction of Bovine Immune Phenotypes after Stimulation with Pokeweed Mitogen
Source: Proteomes. 2022 Feb 8;10(1):7. doi: 10.3390/proteomes10010007 (PMC8883952; doi:10.3390/proteomes10010007)
Supplement: Supplementary file 1 [file proteomes-10-00007-s001.zip]

Archive with 7 entries (7 files):
- Figure S1_Western Blot membranes_Kleinwort et al..pdf
- Table S1_all identified proteins of cellular dataset_Kleinwort et al.xlsx
- Table S2_identified proteins of cellular dataset_ratio2 p005_Kleinwort et al.xlsx
- Table S3_cellular data pathway enrichment analysis_Kleinwort et al.xlsx
- Table S4_all identified proteins of secretome dataset_Kleinwort et al.xlsx
- Table S5_identified proteins of secretome dataset_ratio2 p005_Kleinwort et al.xlsx
- Table S6_secretome data pathway enrichment analysis_Kleinwort et al.xlsx
