# Supplementary material for: Bovine Peripheral Blood Derived Lymphocyte Proteome and Secretome Show Divergent Reaction of Bovine Immune Phenotypes after Stimulation with Pokeweed Mitogen
Source: Proteomes. 2022 Feb 8;10(1):7. doi: 10.3390/proteomes10010007 (PMC8883952; doi:10.3390/proteomes10010007)
Supplement: Supplementary file 1 [file proteomes-10-00007-s001.zip › Table S1_all identified proteins of cellular dataset_Kleinwort et al.xlsx]

## Sheet: combined fractions
Combined proteins from all fractions (Fractions 1+2+3)
Fraction 1 = cytosole (FRK6598)
Fraction 2 = nucleus (FRK6599)											Normalized abundance
Fraction 3 = surface (FRK6597)											not stimulated				PWM stimulated
											measurement A8 from each fraction, combined	measurement A2 from each fraction, combined	measurement A5 from each fraction, combined	measurement A11 from each fraction, combined	measurement A9 from each fraction, combined	measurement A3 from each fraction, combined	measurement A6 from each fraction, combined	measurement A12 from each fraction, combined
Accession	Peptide count	Peptides used for quantitation	Confidence score	Anova (p)	Max fold change	Fractions	Occurrences	Highest mean condition	Lowest mean condition	Description	Sample: control 114	Sample: control 128	Sample: BNP 68	Sample: BNP 78	Sample: control 114	Sample: control 128	Sample: BNP 68	Sample: BNP 78
ENSBTAP00000005970	7	6	397.66	0.000137519	4.51757	2;3	2	PWM	unstim	NUB1_BOVIN|UniProtKB/Swiss-Prot|NEDD8 ultimate buster 1 [Source:UniProtKB/Swiss-Prot;Acc:Q8MJ87]|4|ENSBTAG00000004540|ENSBTAT00000005970	39680.1	65916.3	61064.2	59627.2	174738	259767	321507	266258
ENSBTAP00000002626;ENSBTAP00000054574;ENSBTAP00000055696	8	8	446.23	0.000140823	1.76844	1;2;3	3	PWM	unstim	RL5_BOVIN|UniProtKB/Swiss-Prot|60S ribosomal protein L5 [Source:UniProtKB/Swiss-Prot;Acc:Q58DW5]|3|ENSBTAG00000002026|ENSBTAT00000002626	1.89485e+06	2.61564e+06	1.78997e+06	2.43086e+06	3.28472e+06	4.91978e+06	3.05259e+06	4.18375e+06
ENSBTAP00000002350	4	4	184.36	0.000228605	1.82365	2;3	2	PWM	unstim	LONP1|EntrezGene|lon protease homolog, mitochondrial precursor [Source:RefSeq peptide;Acc:NP_001015569]|7|ENSBTAG00000001795|ENSBTAT00000002350	75091.5	110546	92946.8	108661	140371	190209	182184	193435
ENSBTAP00000009131	1	1	39.1	0.000261955	4.02989	2;3	2	unstim	PWM	Q58CS5_BOVIN|UniProtKB/TrEMBL|FYVE, RhoGEF and PH domain-containing protein 3 [Source:RefSeq peptide;Acc:NP_001019698]|8|ENSBTAG00000006939|ENSBTAT00000009131	45167.8	49856.7	53019.3	46468.9	13732.7	11565.3	11995.8	10973.7
ENSBTAP00000011146	3	1	101.92	0.000262658	6.98178	3	1	PWM	unstim	F1MZT4_BOVIN|UniProtKB/TrEMBL|interferon-induced GTP-binding protein Mx2 [Source:RefSeq peptide;Acc:NP_776366]|1|ENSBTAG00000008471|ENSBTAT00000011146	1867.23	979.868	4711.52	1201.21	16679.9	8263.49	26857.6	9358.16
ENSBTAP00000041467	3	3	126.38	0.000289473	1.82451	2	1	unstim	PWM	ARHGAP1|HGNC Symbol|Rho GTPase activating protein 1 [Source:HGNC Symbol;Acc:673]|15|ENSBTAG00000016501|ENSBTAT00000043933	155434	224946	188128	165717	79382.6	119132	109727	94183
ENSBTAP00000020721	3	1	64.64	0.000323172	2.96298	3	1	unstim	PWM	PRKD2|HGNC Symbol|protein kinase D2 [Source:HGNC Symbol;Acc:17293]|18|ENSBTAG00000015599|ENSBTAT00000020721	12036.6	9723.58	8144.62	12520.4	3919.35	2974.26	3251.68	4173.13
ENSBTAP00000004644;ENSBTAP00000027604	8	8	312.58	0.000349058	1.60782	2;3	2	PWM	unstim	DDX19B|EntrezGene|ATP-dependent RNA helicase DDX19B [Source:RefSeq peptide;Acc:NP_001039695]|18|ENSBTAG00000020714|ENSBTAT00000004644	289747	325401	359199	375843	449024	564111	569631	588090
ENSBTAP00000020484	3	3	110.03	0.000351227	2.05772	2	1	PWM	unstim	TBCD_BOVIN|UniProtKB/Swiss-Prot|Tubulin-specific chaperone D [Source:UniProtKB/Swiss-Prot;Acc:Q28205]|19|ENSBTAG00000015414|ENSBTAT00000020484	14696	20095.9	19496.8	14262.1	27502.2	43895	38420.5	31240.6
ENSBTAP00000003165	4	4	149.27	0.000408677	1.34182	2;3	2	unstim	PWM	Q2KIV7_BOVIN|UniProtKB/TrEMBL|inorganic pyrophosphatase 2, mitochondrial [Source:RefSeq peptide;Acc:NP_001069864]|6|ENSBTAG00000002428|ENSBTAT00000003165	145130	190444	122765	136910	112141	139669	87972.7	103832
ENSBTAP00000017770;ENSBTAP00000041157	3	3	132.21	0.000418233	1.91669	2;3	2	PWM	unstim	RS23_BOVIN|UniProtKB/Swiss-Prot|40S ribosomal protein S23 [Source:UniProtKB/Swiss-Prot;Acc:Q3T199]|7|ENSBTAG00000013358|ENSBTAT00000017770	93813.9	118398	92350.6	152359	190152	206062	170896	308667
ENSBTAP00000030092;ENSBTAP00000037816	5	1	148.44	0.000433057	4.37703	2;3	2	PWM	unstim	RL23A_BOVIN|UniProtKB/Swiss-Prot|60S ribosomal protein L23a [Source:UniProtKB/Swiss-Prot;Acc:Q24JY1]|X|ENSBTAG00000022278|ENSBTAT00000030106	6411.28	7028.1	9453.84	6609.94	22913.9	32436.1	38499.3	35286.9
ENSBTAP00000040143	11	10	690.49	0.000497692	1.36551	1;2;3	3	unstim	PWM	FA49B_BOVIN|UniProtKB/Swiss-Prot|Protein FAM49B [Source:UniProtKB/Swiss-Prot;Acc:Q2KJI3]|14|ENSBTAG00000020801|ENSBTAT00000040368	1.46335e+06	1.79558e+06	1.43369e+06	1.48423e+06	1.11045e+06	1.31757e+06	1.06536e+06	1.0301e+06
ENSBTAP00000025886	9	9	480.82	0.000554595	1.21943	2;3	2	unstim	PWM	A4IFD1_BOVIN|UniProtKB/TrEMBL|programmed cell death protein 4 [Source:RefSeq peptide;Acc:NP_001077116]|26|ENSBTAG00000019434|ENSBTAT00000025886	710342	748386	903541	823455	586740	622556	752672	650497
ENSBTAP00000020701	6	6	245.32	0.000579007	5.87431	2	1	unstim	PWM	HMOX1_BOVIN|UniProtKB/Swiss-Prot|Heme oxygenase 1 [Source:UniProtKB/Swiss-Prot;Acc:Q5E9F2]|5|ENSBTAG00000015582|ENSBTAT00000020701	649380	454455	256288	375066	135669	58870.4	48681.5	52165.5
ENSBTAP00000010311	13	13	926.72	0.000594847	4.59267	1;2;3	3	PWM	unstim	IPYR_BOVIN|UniProtKB/Swiss-Prot|Inorganic pyrophosphatase [Source:UniProtKB/Swiss-Prot;Acc:P37980]|28|ENSBTAG00000007836|ENSBTAT00000010311	1.017e+06	1.32099e+06	1.14253e+06	1.20917e+06	3.47242e+06	7.16784e+06	5.19778e+06	5.70016e+06
ENSBTAP00000007642	8	7	402.91	0.000622496	1.50037	1;2;3	3	PWM	unstim	PSME2_BOVIN|UniProtKB/Swiss-Prot|Proteasome activator complex subunit 2 [Source:UniProtKB/Swiss-Prot;Acc:Q5E9G3]|10|ENSBTAG00000005814|ENSBTAT00000007642	635271	887898	731561	825281	1.01779e+06	1.25415e+06	1.12784e+06	1.22137e+06
ENSBTAP00000020903	8	6	280.8	0.000635788	2.45337	1	1	PWM	unstim	ICAM3|EntrezGene|intercellular adhesion molecule 3 precursor [Source:RefSeq peptide;Acc:NP_776774]|7|ENSBTAG00000015742|ENSBTAT00000020903	145715	233163	152664	132939	327586	602341	417347	282946
ENSBTAP00000040011;ENSBTAP00000054979	2	2	70.28	0.00082856	2.40229	2	1	PWM	unstim	||Uncharacterized protein [Source:UniProtKB/TrEMBL;Acc:F1MS62]|15|ENSBTAG00000012279|ENSBTAT00000040234	10475.4	20932.5	18036.5	14219	30609.7	50674.7	39868.5	31785.4
ENSBTAP00000015136	7	7	422.06	0.00090644	1.65659	1;2;3	3	PWM	unstim	A5PJA6_BOVIN|UniProtKB/TrEMBL|stomatin-like protein 2 [Source:RefSeq peptide;Acc:NP_001033157]|8|ENSBTAG00000011388|ENSBTAT00000015136	114421	185754	112077	149515	203549	320121	169291	237654
ENSBTAP00000021587	7	7	303.9	0.000923547	2.37307	2;3	2	PWM	unstim	RS7_BOVIN|UniProtKB/Swiss-Prot|40S ribosomal protein S7 [Source:UniProtKB/Swiss-Prot;Acc:A6H769]|8|ENSBTAG00000016224|ENSBTAT00000021587	669095	461477	492907	914910	1.46908e+06	1.00864e+06	1.42148e+06	2.12458e+06
ENSBTAP00000018888	2	2	56.62	0.00095533	1.38292	3	1	PWM	unstim	RL35A_BOVIN|UniProtKB/Swiss-Prot|60S ribosomal protein L35a [Source:UniProtKB/Swiss-Prot;Acc:Q56JY1]|1|ENSBTAG00000014208|ENSBTAT00000018888	160702	235240	113460	182908	222024	322390	169812	243185
ENSBTAP00000011107	6	5	234.2	0.000981982	1.40574	2;3	2	unstim	PWM	F1MZU2_BOVIN|UniProtKB/TrEMBL|Uncharacterized protein [Source:UniProtKB/TrEMBL;Acc:F1MZU2]|19|ENSBTAG00000008442|ENSBTAT00000011107	165572	139837	167664	129726	121228	105233	112296	90053.8
ENSBTAP00000019322	10	9	434.16	0.00098603	1.30887	1;2;3	3	PWM	unstim	SFXN1_BOVIN|UniProtKB/Swiss-Prot|Sideroflexin-1 [Source:UniProtKB/Swiss-Prot;Acc:Q5E9M8]|10|ENSBTAG00000014536|ENSBTAT00000019322	507780	738323	466209	419391	632641	1.01199e+06	608999	536501
ENSBTAP00000002843	2	2	80	0.00100394	1.39431	2;3	2	PWM	unstim	ELOC_BOVIN|UniProtKB/Swiss-Prot|Transcription elongation factor B polypeptide 1 [Source:UniProtKB/Swiss-Prot;Acc:Q2KII4]|14|ENSBTAG00000002196|ENSBTAT00000002843	44796.5	55318	50303.1	62351.4	58334	81499.6	69460.2	87372.3
ENSBTAP00000041243	15	12	658.1	0.00108693	1.86172	2;3	2	PWM	unstim	KTN1|EntrezGene|kinectin [Source:RefSeq peptide;Acc:NP_001095675]|10|ENSBTAG00000017713|ENSBTAT00000043690	96151.7	129182	108914	145653	165004	222803	230438	275192
ENSBTAP00000011314	12	11	686.36	0.00110648	1.52797	2;3	2	unstim	PWM	A6QPV1_BOVIN|UniProtKB/TrEMBL|regulator of chromosome condensation 2 [Source:RefSeq peptide;Acc:NP_001095381]|2|ENSBTAG00000008579|ENSBTAT00000011314	1.61091e+06	2.18877e+06	1.32424e+06	1.56277e+06	1.12515e+06	1.38109e+06	916606	953348
ENSBTAP00000015874	1	1	32.22	0.00111609	1.50704	1	1	PWM	unstim	PF4|EntrezGene|platelet factor 4 [Source:RefSeq peptide;Acc:NP_001094532]|6|ENSBTAG00000011961|ENSBTAT00000015874	38220.6	53356.3	63782.3	47547.3	62563.9	83663.5	89983.1	69577.7
ENSBTAP00000027072	6	6	361.38	0.00113819	2.08482	2;3	2	PWM	unstim	FNBP1|HGNC Symbol|formin binding protein 1 [Source:HGNC Symbol;Acc:17069]|11|ENSBTAG00000020313|ENSBTAT00000027072	213820	149011	194682	227745	408181	328934	360138	539871
ENSBTAP00000055511	5	5	118.72	0.00117607	1.29633	1;2	2	unstim	PWM	Q5KTP6_BOVIN|UniProtKB/TrEMBL|major histocompatibility complex, class II, DO beta [Source:RefSeq peptide;Acc:NP_001013618]|23|ENSBTAG00000047707|ENSBTAT00000065976	91081.8	192675	63094.2	95732	74227	145420	46764	75001.4
ENSBTAP00000013748	1	1	29.61	0.00121604	100.611	3	1	PWM	unstim	RIN3|HGNC Symbol|Ras and Rab interactor 3 [Source:HGNC Symbol;Acc:18751]|21|ENSBTAG00000010416|ENSBTAT00000013748	0	0	344.222	0	414.387	387.278	33593.6	237.295
ENSBTAP00000028152	6	6	267.43	0.00123755	1.75054	2;3	2	unstim	PWM	ADD1|HGNC Symbol|adducin 1 (alpha) [Source:HGNC Symbol;Acc:243]|6|ENSBTAG00000021128|ENSBTAT00000028152	347229	306206	253556	278029	188963	160895	164173	162916
ENSBTAP00000041666	2	2	50.17	0.00126921	6.52809	2;3	2	unstim	PWM	PLD3_BOVIN|UniProtKB/Swiss-Prot|Phospholipase D3 [Source:UniProtKB/Swiss-Prot;Acc:Q2KJJ8]|18|ENSBTAG00000019150|ENSBTAT00000044153	116298	135619	106854	106802	23316.7	13808.4	20146.2	14047
ENSBTAP00000052397;ENSBTAP00000050757	8	5	376.27	0.00127091	3.3558	2;3	2	PWM	unstim	|||3|ENSBTAG00000037634|ENSBTAT00000056121	95243.7	93717.7	87598.9	103743	281257	389624	232727	372616
ENSBTAP00000014894	45	27	2856.4	0.0012896	1.33182	1;2;3	3	unstim	PWM	ACTN4_BOVIN|UniProtKB/Swiss-Prot|Alpha-actinin-4 [Source:UniProtKB/Swiss-Prot;Acc:A5D7D1]|18|ENSBTAG00000011215|ENSBTAT00000014894	6.91186e+06	6.71559e+06	7.44682e+06	6.11917e+06	5.53858e+06	4.84981e+06	5.6032e+06	4.42665e+06
ENSBTAP00000026183	10	10	575.34	0.00130609	1.42584	2;3	2	PWM	unstim	GBLP_BOVIN|UniProtKB/Swiss-Prot|Guanine nucleotide-binding protein subunit beta-2-like 1 [Source:UniProtKB/Swiss-Prot;Acc:P63243]|7|ENSBTAG00000019648|ENSBTAT00000026183	2.01294e+06	2.92624e+06	2.37926e+06	2.40123e+06	2.88746e+06	4.47332e+06	3.15811e+06	3.33981e+06
ENSBTAP00000026393	18	18	1150.44	0.00131724	3.59665	1;2;3	3	PWM	unstim	A6QLT9_BOVIN|UniProtKB/TrEMBL|alanyl-tRNA synthetase, cytoplasmic [Source:RefSeq peptide;Acc:NP_001094545]|18|ENSBTAG00000019810|ENSBTAT00000026393	422418	452054	376216	378833	1.08787e+06	1.77211e+06	1.52696e+06	1.47388e+06
ENSBTAP00000037982	11	8	327.65	0.00132136	2.04906	2;3	2	PWM	unstim	DOCK10|HGNC Symbol|dedicator of cytokinesis 10 [Source:HGNC Symbol;Acc:23479]|2|ENSBTAG00000000581|ENSBTAT00000038166	124305	105934	145414	126248	218026	232324	332875	245201
ENSBTAP00000008902	15	15	661.61	0.00133064	2.25782	1;2;3	3	PWM	unstim	A6QLR2_BOVIN|UniProtKB/TrEMBL|leucyl-tRNA synthetase, cytoplasmic [Source:RefSeq peptide;Acc:NP_001095962]|7|ENSBTAG00000006765|ENSBTAT00000008902	372602	559795	562689	427462	737899	1.38159e+06	1.12336e+06	1.09791e+06
ENSBTAP00000004190;ENSBTAP00000054441	6	4	228.35	0.00133262	2.10759	2;3	2	PWM	unstim	RL23_BOVIN|UniProtKB/Swiss-Prot|60S ribosomal protein L23 [Source:UniProtKB/Swiss-Prot;Acc:Q3T057]|19|ENSBTAG00000003229|ENSBTAT00000004190	601248	455557	504842	722165	1.10982e+06	1.12101e+06	1.14454e+06	1.43796e+06
ENSBTAP00000028559	11	10	639.23	0.00137141	1.45994	2;3	2	unstim	PWM	CSK_BOVIN|UniProtKB/Swiss-Prot|Tyrosine-protein kinase CSK [Source:UniProtKB/Swiss-Prot;Acc:Q0VBZ0]|21|ENSBTAG00000021424|ENSBTAT00000028559	888204	828301	814564	757622	557558	566263	575796	553011
ENSBTAP00000024051	10	10	478.14	0.00137541	1.98803	2;3	2	PWM	unstim	YARS|EntrezGene|tyrosyl-tRNA synthetase, cytoplasmic [Source:RefSeq peptide;Acc:NP_776645]|2|ENSBTAG00000018065|ENSBTAT00000024051	254646	453987	327046	306277	570106	781842	642200	673697
ENSBTAP00000018554	10	10	477.32	0.00139844	7.82933	2	1	PWM	unstim	A6QR28_BOVIN|UniProtKB/TrEMBL|phosphoserine aminotransferase [Source:RefSeq peptide;Acc:NP_001095620]|8|ENSBTAG00000013960|ENSBTAT00000018554	148806	172230	145270	151768	662799	1.64486e+06	1.27127e+06	1.26018e+06
ENSBTAP00000052260;ENSBTAP00000008602	14	12	508.47	0.00144161	4.67161	2;3	2	PWM	unstim	E1B884_BOVIN|UniProtKB/TrEMBL|monofunctional C1-tetrahydrofolate synthase, mitochondrial precursor [Source:RefSeq peptide;Acc:NP_001069486]|9|ENSBTAG00000009846|ENSBTAT00000052076	90100.4	98327	94244.2	103185	277314	523697	511167	490396
ENSBTAP00000018947	21	19	1036.56	0.00146153	2.29526	2;3	2	PWM	unstim	SYTC_BOVIN|UniProtKB/Swiss-Prot|Threonyl-tRNA synthetase, cytoplasmic [Source:UniProtKB/Swiss-Prot;Acc:Q3ZBV8]|20|ENSBTAG00000014261|ENSBTAT00000018947	1.51283e+06	1.86057e+06	1.70945e+06	1.75055e+06	3.59128e+06	3.46369e+06	4.48323e+06	4.1462e+06
ENSBTAP00000039151	1	1	34.03	0.00148166	2.5142	1	1	PWM	unstim	SLC23A2|HGNC Symbol|solute carrier family 23 (nucleobase transporters), member 2 [Source:HGNC Symbol;Acc:10973]|13|ENSBTAG00000032366|ENSBTAT00000039356	7418.18	2870.07	6400.1	5253.54	16276.1	8934.57	14810	15145.5
ENSBTAP00000007036;ENSBTAP00000049230;ENSBTAP00000054033	4	4	126.23	0.00153729	2.09892	2;3	2	PWM	unstim	RL27A_BOVIN|UniProtKB/Swiss-Prot|60S ribosomal protein L27a [Source:UniProtKB/Swiss-Prot;Acc:Q56K03]|15|ENSBTAG00000005349|ENSBTAT00000007036	304383	319706	367320	341163	525620	749850	778287	743204
ENSBTAP00000010176	5	3	204.73	0.00157681	1.20282	1;2;3	3	PWM	unstim	RL40_BOVIN|UniProtKB/Swiss-Prot|Ubiquitin-60S ribosomal protein L40Ubiquitin60S ribosomal protein L40 [Source:UniProtKB/Swiss-Prot;Acc:P63048]|7|ENSBTAG00000007737|ENSBTAT00000010176	1.93643e+06	2.17673e+06	1.75344e+06	1.43389e+06	2.3609e+06	2.51723e+06	2.19424e+06	1.70886e+06
ENSBTAP00000006139	18	17	1078.24	0.00161578	4.66209	1;2;3	3	PWM	unstim	SYWC_BOVIN|UniProtKB/Swiss-Prot|Tryptophanyl-tRNA synthetase, cytoplasmicT1-TrpRST2-TrpRS [Source:UniProtKB/Swiss-Prot;Acc:P17248]|21|ENSBTAG00000004679|ENSBTAT00000006139	2.47523e+06	3.65245e+06	4.28466e+06	3.94398e+06	1.4256e+07	2.15835e+07	1.82016e+07	1.28893e+07
ENSBTAP00000040550	3	3	119.57	0.00164494	1.91513	2;3	2	unstim	PWM	Q0VCK1_BOVIN|UniProtKB/TrEMBL|myeloid-associated differentiation marker [Source:RefSeq peptide;Acc:NP_001068720]|18|ENSBTAG00000018152|ENSBTAT00000024157	113611	85869.8	187092	122431	59776.6	50355.6	85217.9	70429.5
ENSBTAP00000015663	1	1	34.47	0.00170838	2.55463	2;3	2	unstim	PWM	STK38|EntrezGene|serine/threonine-protein kinase 38 [Source:RefSeq peptide;Acc:NP_001075071]|23|ENSBTAG00000011126|ENSBTAT00000015663	72796.1	68907.2	66683.2	71152.3	33127	26473.9	28214.9	21608.5
ENSBTAP00000028687	13	10	601.64	0.00171273	2.70112	1;2;3	3	PWM	unstim	STAT3|EntrezGene|signal transducer and activator of transcription 3 [Source:RefSeq peptide;Acc:NP_001012689]|19|ENSBTAG00000021523|ENSBTAT00000028687	199985	241105	266591	238195	404796	677585	810393	662154
ENSBTAP00000022514	2	2	147.79	0.0017158	1.51607	3	1	PWM	unstim	A1L532_BOVIN|UniProtKB/TrEMBL|Heterogeneous nuclear ribonucleoprotein A0Uncharacterized protein [Source:UniProtKB/TrEMBL;Acc:A1L532]|7|ENSBTAG00000016929|ENSBTAT00000022514	211351	172558	262382	367378	319926	283589	358811	574471
ENSBTAP00000018500	2	2	78.11	0.00176745	3.11689	2	1	unstim	PWM	Q3T119_BOVIN|UniProtKB/TrEMBL|igG receptor FcRn large subunit p51 [Source:RefSeq peptide;Acc:NP_788830]|18|ENSBTAG00000013926|ENSBTAT00000018500	63720.1	55151.7	38300.1	64619.7	20881.9	19777.6	14958.4	15540
ENSBTAP00000017497	26	21	1775.15	0.00178468	1.704	1;2;3	3	PWM	unstim	HSP7C_BOVIN|UniProtKB/Swiss-Prot|Heat shock cognate 71 kDa protein [Source:UniProtKB/Swiss-Prot;Acc:P19120]|15|ENSBTAG00000013162|ENSBTAT00000017497	7.45294e+06	1.14957e+07	8.79781e+06	9.68538e+06	1.19544e+07	2.09019e+07	1.31902e+07	1.77375e+07
ENSBTAP00000010269	1	1	42.26	0.00188684	2.55224	3	1	unstim	PWM	MTPN_BOVIN|UniProtKB/Swiss-Prot|Myotrophin [Source:UniProtKB/Swiss-Prot;Acc:Q3T0F7]|4|ENSBTAG00000007806|ENSBTAT00000010269	62884.1	115524	36724.1	47654.4	30827	41483.2	11704.7	18948.2
ENSBTAP00000000805;ENSBTAP00000028031	6	6	242.2	0.00188707	2.01395	3	1	PWM	unstim	Q3ZCE2_BOVIN|UniProtKB/TrEMBL|ELAV-like protein 1 [Source:RefSeq peptide;Acc:NP_001069922]|7|ENSBTAG00000000613|ENSBTAT00000000805	87700.9	98508	224344	229998	182143	250574	422539	434782
ENSBTAP00000019499	6	4	369.27	0.00190525	2.50068	2;3	2	PWM	unstim	EF1D_BOVIN|UniProtKB/Swiss-Prot|Elongation factor 1-delta [Source:UniProtKB/Swiss-Prot;Acc:A5D989]|14|ENSBTAG00000014643|ENSBTAT00000019499	141203	104012	92645.1	152943	286325	260780	213082	467152
ENSBTAP00000003239	15	15	651.8	0.00202764	1.41614	2;3	2	unstim	PWM	VPS35_BOVIN|UniProtKB/Swiss-Prot|Vacuolar protein sorting-associated protein 35 [Source:UniProtKB/Swiss-Prot;Acc:Q2HJG5]|18|ENSBTAG00000002493|ENSBTAT00000003239	549082	573247	534810	526069	424161	408756	358015	350724
ENSBTAP00000016237	1	1	53.91	0.00202959	2.59037	2;3	2	PWM	unstim	DPOD2_BOVIN|UniProtKB/Swiss-Prot|DNA polymerase delta subunit 2 [Source:UniProtKB/Swiss-Prot;Acc:P49004]|4|ENSBTAG00000012241|ENSBTAT00000016237	6357.5	10741.5	9774.53	7866.74	12985.3	24956.9	28740.6	23307.4
ENSBTAP00000049498	1	1	20.77	0.00208111	2.0141	3	1	unstim	PWM	GP1BB|HGNC Symbol|glycoprotein Ib (platelet), beta polypeptide [Source:HGNC Symbol;Acc:4440]|17|ENSBTAG00000039059|ENSBTAT00000055945	64689.5	63213.5	41852.9	71188.2	37877.6	27757	22197.2	31796.8
ENSBTAP00000018886	4	4	155.28	0.00215513	1.54225	2;3	2	unstim	PWM	KAP2_BOVIN|UniProtKB/Swiss-Prot|cAMP-dependent protein kinase type II-alpha regulatory subunit [Source:UniProtKB/Swiss-Prot;Acc:P00515]|22|ENSBTAG00000014205|ENSBTAT00000018886	122531	145861	123216	116427	87845.2	88166	74255.6	79144.5
ENSBTAP00000003206;ENSBTAP00000025235	9	9	516.51	0.00215638	1.5175	2;3	2	unstim	PWM	RB11B_BOVIN|UniProtKB/Swiss-Prot|Ras-related protein Rab-11B [Source:UniProtKB/Swiss-Prot;Acc:Q3MHP2]|7|ENSBTAG00000002475|ENSBTAT00000003206	1.2412e+06	1.35094e+06	1.16121e+06	1.29558e+06	902124	920346	718423	786250
ENSBTAP00000050126;ENSBTAP00000017363	6	6	202.94	0.00217114	4.15431	3	1	unstim	PWM	F1MEZ5_BOVIN|UniProtKB/TrEMBL|duodenase-1 precursor [Source:RefSeq peptide;Acc:NP_776721]|21|ENSBTAG00000039813|ENSBTAT00000051876	259676	807190	506078	113060	77766.5	164053	121989	42035.4
ENSBTAP00000015734	5	1	184.1	0.0021751	2.84	2;3	2	PWM	unstim	HDAC2|EntrezGene|histone deacetylase 2 [Source:RefSeq peptide;Acc:NP_001068614]|9|ENSBTAG00000011849|ENSBTAT00000015734	5378.98	2086.79	8484.35	5432.8	11628.4	7489.36	26167.9	15441.8
ENSBTAP00000032097	2	2	75.51	0.00220963	1.7968	2;3	2	unstim	PWM	TMED5_BOVIN|UniProtKB/Swiss-Prot|Transmembrane emp24 domain-containing protein 5 [Source:UniProtKB/Swiss-Prot;Acc:Q2KJ84]|3|ENSBTAG00000020180|ENSBTAT00000032159	121913	105157	70132.4	100216	61458	54060.6	44284.5	61378.2
ENSBTAP00000006601	5	4	134.8	0.00226964	1.63274	2	1	unstim	PWM	SFXN3_BOVIN|UniProtKB/Swiss-Prot|Sideroflexin-3 [Source:UniProtKB/Swiss-Prot;Acc:A6QP55]|26|ENSBTAG00000005015|ENSBTAT00000006601	126445	81675.4	151827	82407.4	82890.3	49158.8	96236	42642.4
ENSBTAP00000022227;ENSBTAP00000023407;ENSBTAP00000042206	8	4	563.57	0.00232943	1.52119	2;3	2	unstim	PWM	A1L528_BOVIN|UniProtKB/TrEMBL|ras-related protein Rab-1A [Source:RefSeq peptide;Acc:NP_001028800]|11|ENSBTAG00000016720|ENSBTAT00000022227	1.43483e+06	1.36731e+06	1.09679e+06	1.16231e+06	1.03433e+06	806839	748815	737175
ENSBTAP00000008177	3	3	70.7	0.00234075	1.75412	2	1	PWM	unstim	F1MN74_BOVIN|UniProtKB/TrEMBL|isocitrate dehydrogenase [Source:RefSeq peptide;Acc:NP_777069]|21|ENSBTAG00000006227|ENSBTAT00000008177	53453.9	72649.8	65176.6	66131.2	105404	126091	120662	99373.7
ENSBTAP00000015834;ENSBTAP00000002520	10	9	473.77	0.00236696	3.16529	2;3	2	PWM	unstim	F1MDS3_BOVIN|UniProtKB/TrEMBL|Uncharacterized protein [Source:UniProtKB/TrEMBL;Acc:F1MDS3]|10|ENSBTAG00000011934|ENSBTAT00000015834	156201	216598	208723	188856	348888	837828	628460	623289
ENSBTAP00000024487	7	6	407.25	0.00238302	1.80644	2;3	2	PWM	unstim	F1MDW1_BOVIN|UniProtKB/TrEMBL|methionyl-tRNA synthetase, cytoplasmic [Source:RefSeq peptide;Acc:NP_001033180]|5|ENSBTAG00000018405|ENSBTAT00000024487	211708	196282	247610	238783	333166	414897	431522	436064
ENSBTAP00000036487;ENSBTAP00000053521	78	78	4624.24	0.00260685	1.35439	1;2;3	3	unstim	PWM	TLN1|HGNC Symbol|talin 1 [Source:HGNC Symbol;Acc:11845]|8|ENSBTAG00000025868|ENSBTAT00000036631	1.62929e+07	1.51923e+07	1.47317e+07	1.34941e+07	1.27162e+07	1.12632e+07	1.10826e+07	9.02524e+06
ENSBTAP00000019081	4	2	287.27	0.00266025	2.54964	2	1	PWM	unstim	|||3|ENSBTAG00000002416|ENSBTAT00000019081	44653.6	71196.1	52410.1	59706.4	138959	167509	154786	119978
ENSBTAP00000003545	4	4	116.28	0.00266544	1.74622	3	1	PWM	unstim	F2Z4J5_BOVIN|UniProtKB/TrEMBL|eukaryotic translation initiation factor 3 subunit G [Source:RefSeq peptide;Acc:NP_001073091]|7|ENSBTAG00000002734|ENSBTAT00000003545	52900.2	59395.8	33888.9	81584.1	84619.6	100775	71977.8	140362
ENSBTAP00000002418	1	1	47.43	0.00267449	2.59527	2	1	PWM	unstim	CPIN1_BOVIN|UniProtKB/Swiss-Prot|Anamorsin [Source:UniProtKB/Swiss-Prot;Acc:Q5EAC7]|18|ENSBTAG00000001854|ENSBTAT00000002418	16370.9	9072.52	10339.2	8823.73	32745.1	30211.9	28999.9	23808.7
ENSBTAP00000052689	24	17	1392.63	0.00268309	1.61309	3	1	unstim	PWM	E1BCJ4_BOVIN|UniProtKB/TrEMBL|lamin-B1 [Source:RefSeq peptide;Acc:NP_001096765]|7|ENSBTAG00000002882|ENSBTAT00000052423	6.63063e+06	6.34741e+06	5.07215e+06	6.06234e+06	4.29602e+06	4.31184e+06	3.10856e+06	3.23167e+06
ENSBTAP00000015473	8	7	242.22	0.0026838	1.22174	2;3	2	PWM	unstim	A8E4P2_BOVIN|UniProtKB/TrEMBL|phenylalanyl-tRNA synthetase, beta subunit [Source:RefSeq peptide;Acc:NP_001098491]|2|ENSBTAG00000011649|ENSBTAT00000015473	162102	201592	187571	184430	193653	235573	231530	238074
ENSBTAP00000000144	17	13	986.36	0.00268913	1.99463	1;2;3	3	PWM	unstim	IF4A1_BOVIN|UniProtKB/Swiss-Prot|Eukaryotic initiation factor 4A-I [Source:UniProtKB/Swiss-Prot;Acc:Q3SZ54]|19|ENSBTAG00000000132|ENSBTAT00000000144	942602	1.51336e+06	1.28341e+06	1.24704e+06	1.72652e+06	2.68936e+06	2.46351e+06	3.06669e+06
ENSBTAP00000000159	1	1	54.32	0.00270554	2.42334	2	1	unstim	PWM	Q3ZCJ6_BOVIN|UniProtKB/TrEMBL|epoxide hydrolase 1 [Source:RefSeq peptide;Acc:NP_001029801]|16|ENSBTAG00000000140|ENSBTAT00000000159	39512	5967.07	32699.7	22646.6	19766.8	2675.89	10440.8	8722.52
ENSBTAP00000046390	7	7	309.36	0.00270887	1.39828	1;2	2	PWM	unstim	A4IFT6_BOVIN|UniProtKB/TrEMBL|transmembrane emp24 domain-containing protein 7 [Source:RefSeq peptide;Acc:NP_001098966]|10|ENSBTAG00000035030|ENSBTAT00000049503	529777	784502	435611	352785	723879	1.07847e+06	582214	555575
ENSBTAP00000018258	10	10	510.58	0.00271037	1.41027	1;3	2	unstim	PWM	CD5_BOVIN|UniProtKB/Swiss-Prot|T-cell surface glycoprotein CD5 [Source:UniProtKB/Swiss-Prot;Acc:P19238]|29|ENSBTAG00000013730|ENSBTAT00000018258	2.04853e+06	2.25947e+06	2.58089e+06	1.8006e+06	1.47668e+06	1.71114e+06	1.83489e+06	1.13888e+06
ENSBTAP00000027511;ENSBTAP00000002747;ENSBTAP00000003515;ENSBTAP00000011395;ENSBTAP00000033570	16	9	1024.77	0.00272078	1.67284	1;2;3	3	unstim	PWM	A7MBH9_BOVIN|UniProtKB/TrEMBL|guanine nucleotide-binding protein G(i) subunit alpha-2 [Source:RefSeq peptide;Acc:NP_001094510]|22|ENSBTAG00000020645|ENSBTAT00000027511	2.24175e+06	2.4493e+06	2.41568e+06	2.4632e+06	1.45881e+06	1.61075e+06	1.36697e+06	1.28425e+06
ENSBTAP00000009715	6	6	388.41	0.00273182	1.95571	2	1	unstim	PWM	VAT1|HGNC Symbol|vesicle amine transport protein 1 homolog (T. californica) [Source:HGNC Symbol;Acc:16919]|19|ENSBTAG00000007390|ENSBTAT00000009715	596633	543304	543231	593075	365364	231415	269462	297657
ENSBTAP00000008678	8	8	390.64	0.00280117	1.67371	1;2;3	3	PWM	unstim	A6QQN2_BOVIN|UniProtKB/TrEMBL|tyrosine-protein phosphatase non-receptor type 1 [Source:RefSeq peptide;Acc:NP_001093796]|13|ENSBTAG00000006616|ENSBTAT00000008678	301592	340977	273149	280516	485723	622935	490521	402971
ENSBTAP00000001576	17	8	770.42	0.00280698	1.45655	2;3	2	unstim	PWM	AP1B1|EntrezGene|adaptor-related protein complex 1, beta 1 subunit [Source:RefSeq peptide;Acc:NP_001039403]|17|ENSBTAG00000001189|ENSBTAT00000001576	367475	315521	286935	326909	248591	197653	219628	224478
ENSBTAP00000016989	3	3	137.05	0.00285457	3.93221	3	1	unstim	PWM	A6QPT4_BOVIN|UniProtKB/TrEMBL|myeloperoxidase [Source:RefSeq peptide;Acc:NP_001106769]|19|ENSBTAG00000011616|ENSBTAT00000016989	187486	90289.4	31324.9	57336.2	58195.5	17929.3	8551.33	8512.25
ENSBTAP00000019785;ENSBTAP00000048354	10	9	505.87	0.00290499	4.42842	2	1	PWM	unstim	||Uncharacterized protein [Source:UniProtKB/TrEMBL;Acc:E1BMK7]|3|ENSBTAG00000014857|ENSBTAT00000019785	100928	111330	81446.2	133956	394647	728496	368920	401797
ENSBTAP00000015705	3	2	146.46	0.00294995	1.99314	1;2	2	PWM	unstim	CCDC47|HGNC Symbol|coiled-coil domain containing 47 [Source:HGNC Symbol;Acc:24856]|19|ENSBTAG00000011834|ENSBTAT00000015705	20857.9	14962.5	12859.5	16209.5	35616.3	27015.4	29167.3	37534.8
ENSBTAP00000034522	13	13	523.67	0.00296175	2.45535	2;3	2	PWM	unstim	EIF5B|EntrezGene|eukaryotic translation initiation factor 5B [Source:RefSeq peptide;Acc:NP_001033242]|11|ENSBTAG00000034255|ENSBTAT00000034635	136494	150136	141492	224675	250315	394385	411099	547050
ENSBTAP00000005629;ENSBTAP00000011359	13	6	702.04	0.00296714	1.68867	2;3	2	unstim	PWM	SEPT6_BOVIN|UniProtKB/Swiss-Prot|Septin-6 [Source:UniProtKB/Swiss-Prot;Acc:Q3SZN0]|X|ENSBTAG00000004291|ENSBTAT00000005629	1.14724e+06	1.23714e+06	1.51022e+06	1.25703e+06	754626	722306	767949	805819
ENSBTAP00000022292	9	8	488.39	0.00298287	1.27759	2;3	2	unstim	PWM	A6QNM9_BOVIN|UniProtKB/TrEMBL|calcium-binding mitochondrial carrier protein Aralar1 [Source:RefSeq peptide;Acc:NP_001094664]|2|ENSBTAG00000016762|ENSBTAT00000022292	232747	276233	237646	185375	189923	204729	181065	153786
ENSBTAP00000001671	2	2	69.39	0.00301114	1.48044	2	1	PWM	unstim	TMEM165|HGNC Symbol|transmembrane protein 165 [Source:HGNC Symbol;Acc:30760]|6|ENSBTAG00000001269|ENSBTAT00000001671	22471	24503.3	18353.1	19607.8	33656.8	39876.4	24381.4	27826.6
ENSBTAP00000010454	1	1	27.86	0.00302001	2.28698	2	1	unstim	PWM	Q3T103_BOVIN|UniProtKB/TrEMBL|CDP-diacylglycerol--inositol 3-phosphatidyltransferase [Source:RefSeq peptide;Acc:NP_001029654]|25|ENSBTAG00000007954|ENSBTAT00000010454	22949.1	17132.2	13367	19679.4	9657.5	5799.55	6845.93	9672.68
ENSBTAP00000017442	8	7	456.51	0.00304976	1.47172	2;3	2	PWM	unstim	PHB2_BOVIN|UniProtKB/Swiss-Prot|Prohibitin-2 [Source:UniProtKB/Swiss-Prot;Acc:Q2HJ97]|5|ENSBTAG00000013123|ENSBTAT00000017442	762919	1.12114e+06	733070	850947	1.02872e+06	1.56946e+06	1.20032e+06	1.30552e+06
ENSBTAP00000025254	6	5	310.32	0.00305242	3.66004	2;3	2	PWM	unstim	A5D7A2_BOVIN|UniProtKB/TrEMBL|glycyl-tRNA synthetase [Source:RefSeq peptide;Acc:NP_001091035]|4|ENSBTAG00000018972|ENSBTAT00000025254	123781	165557	144471	152273	322826	497798	572842	751622
ENSBTAP00000036979	3	3	126.16	0.00311457	1.46941	3	1	PWM	unstim	BUD31_BOVIN|UniProtKB/Swiss-Prot|Protein BUD31 homolog [Source:UniProtKB/Swiss-Prot;Acc:Q2NKU3]|25|ENSBTAG00000020439|ENSBTAT00000037140	66915.9	38576.9	72445.7	64516	94664.9	61930.8	113853	85817.5
ENSBTAP00000025094;ENSBTAP00000035214	9	9	353.2	0.00313153	1.95639	2	1	PWM	unstim	SYHC_BOVIN|UniProtKB/Swiss-Prot|Histidyl-tRNA synthetase, cytoplasmic [Source:UniProtKB/Swiss-Prot;Acc:Q2KI84]|7|ENSBTAG00000018847|ENSBTAT00000025094	140333	167350	184483	177369	242139	403228	346842	317662
ENSBTAP00000033440	3	1	88.42	0.00327011	2.93044	2	1	PWM	unstim	|||3|ENSBTAG00000024272|ENSBTAT00000033527	6386.33	5990.16	6607.5	4942.27	13456.6	22795.8	20077.2	13784.8
ENSBTAP00000015358	8	8	541.63	0.00327754	1.60016	2;3	2	PWM	unstim	RL7A_BOVIN|UniProtKB/Swiss-Prot|60S ribosomal protein L7a [Source:UniProtKB/Swiss-Prot;Acc:Q2TBQ5]|11|ENSBTAG00000011559|ENSBTAT00000015358	2.27195e+06	2.51939e+06	1.54132e+06	2.46691e+06	3.36727e+06	4.06208e+06	2.92128e+06	3.73009e+06
ENSBTAP00000020395	61	59	3184.07	0.00334788	1.93593	2;3	2	unstim	PWM	SPTAN1|EntrezGene|spectrin alpha chain, brain [Source:RefSeq peptide;Acc:NP_001107628]|11|ENSBTAG00000015327|ENSBTAT00000020395	3.81072e+06	4.2404e+06	3.39966e+06	2.7562e+06	1.6752e+06	2.06553e+06	2.15493e+06	1.44293e+06
ENSBTAP00000006419	2	2	89.57	0.00337439	7.87539	2;3	2	PWM	unstim	MTDC_BOVIN|UniProtKB/Swiss-Prot|Bifunctional methylenetetrahydrofolate dehydrogenase/cyclohydrolase, mitochondrialNAD-dependent methylenetetrahydrofolate dehydrogenaseMethenyltetrahydrofolate cyclohydrolase [Source:UniProtKB/Swiss-Prot;Acc:Q0P5C2]|1	5337.73	7212.5	10256.9	6666.62	35505.1	98843.9	44999.8	52768.6
ENSBTAP00000028661	3	3	204.56	0.00339187	1.28307	2;3	2	unstim	PWM	PRAF3_BOVIN|UniProtKB/Swiss-Prot|PRA1 family protein 3 [Source:UniProtKB/Swiss-Prot;Acc:Q5E9M1]|22|ENSBTAG00000021506|ENSBTAT00000028661	435383	506894	358826	546649	340031	394722	303257	402094
ENSBTAP00000014549	7	7	229.53	0.00347415	1.1178	1;2	2	unstim	PWM	A6QQP4_BOVIN|UniProtKB/TrEMBL|lysosome membrane protein 2 [Source:RefSeq peptide;Acc:NP_001095623]|6|ENSBTAG00000010956|ENSBTAT00000014549	425263	286756	271557	256082	382655	255707	249782	220875
ENSBTAP00000002642	4	4	265.6	0.00350345	1.83178	2;3	2	PWM	unstim	RL14_BOVIN|UniProtKB/Swiss-Prot|60S ribosomal protein L14 [Source:UniProtKB/Swiss-Prot;Acc:Q3T0U2]|22|ENSBTAG00000002038|ENSBTAT00000002642	889610	896233	771356	1.00891e+06	1.32246e+06	1.7724e+06	1.57343e+06	1.86403e+06
ENSBTAP00000018414;ENSBTAP00000017146;ENSBTAP00000052370	2	2	85.9	0.00352448	1.85803	2;3	2	PWM	unstim	RS27_BOVIN|UniProtKB/Swiss-Prot|40S ribosomal protein S27 [Source:UniProtKB/Swiss-Prot;Acc:Q2KHT7]|3|ENSBTAG00000013866|ENSBTAT00000018414	188045	234776	210781	223982	344937	376324	367063	505093
ENSBTAP00000003415	9	8	322.89	0.0035841	1.48667	2;3	2	unstim	PWM	F1N6U4_BOVIN|UniProtKB/TrEMBL|Uncharacterized protein [Source:UniProtKB/TrEMBL;Acc:F1N6U4]|19|ENSBTAG00000002633|ENSBTAT00000003415	794271	978742	898830	716062	560643	646444	538402	533361
ENSBTAP00000019050	2	2	128.94	0.00364218	1.53563	1;2	2	PWM	unstim	Q08DG9_BOVIN|UniProtKB/TrEMBL|anthrax toxin receptor 2 [Source:RefSeq peptide;Acc:NP_001070294]|6|ENSBTAG00000014324|ENSBTAT00000019050	74284.2	145455	88589.5	79759.4	132009	198663	138173	127117
ENSBTAP00000027224	2	2	57.44	0.00366946	2.78387	3	1	PWM	unstim	PAF1_BOVIN|UniProtKB/Swiss-Prot|RNA polymerase II-associated factor 1 homolog [Source:UniProtKB/Swiss-Prot;Acc:Q2KJ14]|18|ENSBTAG00000020428|ENSBTAT00000027224	2521.47	3091.1	5621.49	5437.55	9739.8	6913.28	13385.9	16372.7
ENSBTAP00000027893	14	12	703.94	0.00368194	1.815	2;3	2	unstim	PWM	ANXA11|EntrezGene|annexin A11 [Source:RefSeq peptide;Acc:NP_776927]|28|ENSBTAG00000020940|ENSBTAT00000027893	2.80304e+06	3.5201e+06	1.87702e+06	2.24519e+06	1.84725e+06	1.7103e+06	1.0882e+06	1.10928e+06
ENSBTAP00000014390	3	3	172.02	0.00368256	1.80794	2;3	2	unstim	PWM	A5PJQ6_BOVIN|UniProtKB/TrEMBL|membrane-associated progesterone receptor component 2 [Source:RefSeq peptide;Acc:NP_001092530]|17|ENSBTAG00000010843|ENSBTAT00000014390	115807	187193	110151	131963	76239.1	89426.2	57647.3	78199.1
ENSBTAP00000027808;ENSBTAP00000031255	5	4	179.41	0.00370291	1.37498	2	1	PWM	unstim	A7E3T7_BOVIN|UniProtKB/TrEMBL|S-adenosylmethionine synthase isoform type-2 [Source:RefSeq peptide;Acc:NP_001094601]|11|ENSBTAG00000020873|ENSBTAT00000027808	185638	240622	217172	231169	267264	358544	282680	294074
ENSBTAP00000021948	1	1	26.78	0.00370714	3.14209	3	1	PWM	unstim	A8YXZ6_BOVIN|UniProtKB/TrEMBL|ribosomal RNA processing 7 homolog A [Source:RefSeq peptide;Acc:NP_001103544]|5|ENSBTAG00000016510|ENSBTAT00000021948	7802.25	7182.69	8724.4	8304.34	16930.1	30287	27540.8	25832.1
ENSBTAP00000002646	1	1	43.79	0.00372761	2.07742	2	1	PWM	unstim	RIC8A_BOVIN|UniProtKB/Swiss-Prot|Synembryn-A [Source:UniProtKB/Swiss-Prot;Acc:Q5E9J8]|11|ENSBTAG00000002042|ENSBTAT00000002646	3883.02	5888.57	5332.4	5402.62	9845.33	10024.6	12326.2	10404.8
ENSBTAP00000001034	26	6	1711.03	0.00381358	3.08078	1;2;3	3	PWM	unstim	Q7M2S2_BOVIN|UniProtKB/TrEMBL|heat shock protein HSP 90-beta [Source:RefSeq peptide;Acc:NP_001073105]|23|ENSBTAG00000000778|ENSBTAT00000001034	1.09688e+06	1.4614e+06	1.11773e+06	1.29757e+06	2.19467e+06	5.17422e+06	3.81497e+06	4.13863e+06
ENSBTAP00000025008	12	5	560.1	0.0038521	1.88894	2;3	2	unstim	PWM	E1BJK2_BOVIN|UniProtKB/TrEMBL|tubulin, beta 1 [Source:RefSeq peptide;Acc:NP_001137572]|13|ENSBTAG00000018785|ENSBTAT00000025008	712372	491219	394329	204251	390104	294187	161830	107941
ENSBTAP00000016365	4	4	169.75	0.00388813	2.7429	2	1	PWM	unstim	Q5GF34_BOVIN|UniProtKB/TrEMBL|ubiquitin-like modifier-activating enzyme 7 [Source:RefSeq peptide;Acc:NP_001012284]|22|ENSBTAG00000012335|ENSBTAT00000016365	31142	31789.9	26584.6	33853.8	90749.1	104723	78839.5	64081.2
ENSBTAP00000020564	1	1	37.5	0.00390158	2.20801	3	1	PWM	unstim	Q148M1_BOVIN|UniProtKB/TrEMBL|splicing factor, arginine/serine-rich 11 [Source:RefSeq peptide;Acc:NP_001069089]|3|ENSBTAG00000015474|ENSBTAT00000020564	12959.4	15348.4	11766.1	28004.3	33958.8	40700.2	21467	54191.6
ENSBTAP00000006600	12	11	522.53	0.00407575	2.06194	2;3	2	PWM	unstim	HS105_BOVIN|UniProtKB/Swiss-Prot|Heat shock protein 105 kDa [Source:UniProtKB/Swiss-Prot;Acc:Q0IIM3]|12|ENSBTAG00000005012|ENSBTAT00000006600	129605	227925	187993	174073	209234	453530	390607	430395
ENSBTAP00000024978	1	1	26.9	0.00409068	6.37133	2	1	unstim	PWM	A4IFE7_BOVIN|UniProtKB/TrEMBL|hypothetical protein LOC525690 [Source:RefSeq peptide;Acc:NP_001077173]|11|ENSBTAG00000018761|ENSBTAT00000024978	10171.8	14627.1	3981.7	9006.78	2807.63	1262.18	531.732	1329.3
ENSBTAP00000016359	4	4	85.12	0.0040975	2.86714	1	1	PWM	unstim	B2MG_BOVIN|UniProtKB/Swiss-Prot|Beta-2-microglobulin [Source:UniProtKB/Swiss-Prot;Acc:P01888]|10|ENSBTAG00000012330|ENSBTAT00000016359	134228	76877	157901	139674	384646	229988	316652	527175
ENSBTAP00000013636	18	17	895.77	0.00421576	1.9484	1;2;3	3	PWM	unstim	E1B748_BOVIN|UniProtKB/TrEMBL|Uncharacterized protein [Source:UniProtKB/TrEMBL;Acc:E1B748]|15|ENSBTAG00000010322|ENSBTAT00000013636	432226	588452	413181	619755	1.08296e+06	1.02971e+06	731756	1.15683e+06
ENSBTAP00000025963	8	2	352.33	0.00424028	1.73135	2;3	2	PWM	unstim	RL10A_BOVIN|UniProtKB/Swiss-Prot|60S ribosomal protein L10a [Source:UniProtKB/Swiss-Prot;Acc:Q5E9E6]|23|ENSBTAG00000019494|ENSBTAT00000025963	303416	309056	259151	334459	475929	581910	523548	506769
ENSBTAP00000018026	13	13	412.53	0.00425622	1.38094	1;2	2	PWM	unstim	ERAP1|EntrezGene|endoplasmic reticulum aminopeptidase 1 [Source:RefSeq peptide;Acc:NP_001095473]|7|ENSBTAG00000013557|ENSBTAT00000018026	439932	392853	326424	206737	657812	486416	444801	297266
ENSBTAP00000040572	1	1	30.66	0.00426502	2.06482	2	1	unstim	PWM	FUCO_BOVIN|UniProtKB/Swiss-Prot|Tissue alpha-L-fucosidase [Source:UniProtKB/Swiss-Prot;Acc:Q2KIM0]|2|ENSBTAG00000030434|ENSBTAT00000042970	60917.5	45441.9	53480.9	70741.9	33151	26236.8	20615.5	31668.2
ENSBTAP00000051735	14	1	709.09	0.00428631	3.56065	3	1	unstim	PWM	GSN|EntrezGene|gelsolin a [Source:RefSeq peptide;Acc:NP_001106755]|8|ENSBTAG00000019915|ENSBTAT00000053931	57358.5	101612	25496.6	47432	23683.5	25105	7443.03	8896.8
ENSBTAP00000015866	1	1	46.86	0.00438014	7.82204	3	1	PWM	unstim	Q2KI36_BOVIN|UniProtKB/TrEMBL|signal peptidase complex catalytic subunit SEC11C [Source:RefSeq peptide;Acc:NP_001068643]|24|ENSBTAG00000011954|ENSBTAT00000015866	782.109	187.795	713.745	476.536	2912.07	1331.72	9045.76	3607.5
ENSBTAP00000016216	2	2	51.61	0.00438789	55.7336	3	1	PWM	unstim	Q3SYV6_BOVIN|UniProtKB/TrEMBL|importin subunit alpha-2 [Source:RefSeq peptide;Acc:NP_001029621]|19|ENSBTAG00000012225|ENSBTAT00000016216	70.1209	735.093	369.639	425.097	6405.06	8694.46	35296.7	38774.7
ENSBTAP00000023500	10	6	673.36	0.00447237	3.29386	1;2;3	3	PWM	unstim	||Uncharacterized protein [Source:UniProtKB/TrEMBL;Acc:F1MY62]|3|ENSBTAG00000017670|ENSBTAT00000023500	119787	210395	112600	172882	558659	652703	427766	388784
ENSBTAP00000037506	14	8	643.71	0.00449643	1.45704	2;3	2	unstim	PWM	A7E307_BOVIN|UniProtKB/TrEMBL|probable ATP-dependent RNA helicase DDX17 [Source:RefSeq peptide;Acc:NP_001095463]|5|ENSBTAG00000009887|ENSBTAT00000037682	1.17865e+06	1.41413e+06	1.31412e+06	1.2508e+06	930090	915553	896855	797343
ENSBTAP00000032150	11	8	446.48	0.00450317	2.30785	2;3	2	PWM	unstim	EIF4G1|HGNC Symbol|eukaryotic translation initiation factor 4 gamma, 1 [Source:HGNC Symbol;Acc:3296]|1|ENSBTAG00000012881|ENSBTAT00000032213	166205	211710	213298	209179	279506	471716	523623	572335
ENSBTAP00000005603	10	9	300.49	0.00453132	1.32377	2;3	2	unstim	PWM	APMAP_BOVIN|UniProtKB/Swiss-Prot|Adipocyte plasma membrane-associated protein [Source:UniProtKB/Swiss-Prot;Acc:Q3T0E5]|13|ENSBTAG00000004278|ENSBTAT00000005603	356820	330419	285201	460730	265503	255712	237296	324136
ENSBTAP00000031029	2	2	67.3	0.00454532	2.91485	2;3	2	PWM	unstim	IFI44L|HGNC Symbol|interferon-induced protein 44-like [Source:HGNC Symbol;Acc:17817]|3|ENSBTAG00000030932|ENSBTAT00000031066	5235.58	9862.15	7250.34	10304.1	22366.1	28236.3	22581.7	21992.1
ENSBTAP00000022579	2	2	72.08	0.00458707	1.32761	2;3	2	unstim	PWM	FUND2_BOVIN|UniProtKB/Swiss-Prot|FUN14 domain-containing protein 2 [Source:UniProtKB/Swiss-Prot;Acc:Q8MJN0]|X|ENSBTAG00000016977|ENSBTAT00000022579	114575	154838	101941	89259.4	86881	112962	72351.5	74753.3
ENSBTAP00000023094;ENSBTAP00000012026	3	3	222.37	0.00471565	1.78531	2;3	2	PWM	unstim	YBX1|EntrezGene|nuclease-sensitive element-binding protein 1 [Source:RefSeq peptide;Acc:NP_777240]|3|ENSBTAG00000017368|ENSBTAT00000023094	102397	396625	152668	219913	240302	661707	292608	361468
ENSBTAP00000017556	3	3	103.31	0.00472448	6.31468	2	1	unstim	PWM	LRP1|HGNC Symbol|low density lipoprotein receptor-related protein 1 [Source:HGNC Symbol;Acc:6692]|5|ENSBTAG00000010830|ENSBTAT00000017556	31179.5	61709.4	33015.9	29496.1	5557.4	5404.92	5431.63	8215.52
ENSBTAP00000025343	4	4	162	0.00475398	3.30862	2	1	unstim	PWM	PLBD2|EntrezGene|putative phospholipase B-like 2 precursor [Source:RefSeq peptide;Acc:NP_001039635]|17|ENSBTAG00000019040|ENSBTAT00000025343	104835	148714	105439	129635	46182.5	31094	27692.1	42713.5
ENSBTAP00000027875	2	2	57.79	0.00476433	1.85704	3	1	unstim	PWM	HSD17B8|EntrezGene|estradiol 17-beta-dehydrogenase 8 [Source:RefSeq peptide;Acc:NP_001039789]|23|ENSBTAG00000020927|ENSBTAT00000027875	43492.5	43417.6	26434.4	46165.9	25095.7	23286.9	17103.1	20409.2
ENSBTAP00000026278	3	3	132.19	0.00476884	1.66567	2;3	2	PWM	unstim	RS15_BOVIN|UniProtKB/Swiss-Prot|40S ribosomal protein S15 [Source:UniProtKB/Swiss-Prot;Acc:Q56K10]|7|ENSBTAG00000019718|ENSBTAT00000026278	191506	213808	169187	316410	293086	430759	286967	473147
ENSBTAP00000056448	4	4	286.24	0.00477692	1.70064	3	1	unstim	PWM	WDR5|EntrezGene|WD repeat-containing protein 5 [Source:RefSeq peptide;Acc:NP_001098945]|11|ENSBTAG00000047031|ENSBTAT00000066090	282138	339323	299982	200140	167606	205393	148121	138387
ENSBTAP00000003953;ENSBTAP00000036155;ENSBTAP00000045944;ENSBTAP00000054696	15	15	798.56	0.00477973	1.52586	1;2;3	3	PWM	unstim	F1N2T8_BOVIN|UniProtKB/TrEMBL|transporter 2, ATP-binding cassette, sub-family B [Source:RefSeq peptide;Acc:NP_001040087]|23|ENSBTAG00000003038|ENSBTAT00000003953	663374	674963	605088	725545	972018	1.19108e+06	926453	982934
ENSBTAP00000027868	7	7	332.97	0.0048148	1.70977	2;3	2	PWM	unstim	UPF1|HGNC Symbol|UPF1 regulator of nonsense transcripts homolog (yeast) [Source:HGNC Symbol;Acc:9962]|7|ENSBTAG00000020922|ENSBTAT00000027868	100003	58081.3	101018	125554	143440	117911	183148	213173
ENSBTAP00000055373	2	2	51.42	0.00486645	2.23615	2	1	unstim	PWM	A6QNX2_BOVIN|UniProtKB/TrEMBL|dipeptidyl peptidase 7 [Source:RefSeq peptide;Acc:NP_001098513]|GJ059509.1|ENSBTAG00000047958|ENSBTAT00000064726	21453	32487.9	15602.1	26300.3	12190.8	11277.1	7729.83	11663.1
ENSBTAP00000019085	1	1	59.5	0.00490216	2.06598	2;3	2	PWM	unstim	SRP14_BOVIN|UniProtKB/Swiss-Prot|Signal recognition particle 14 kDa protein [Source:UniProtKB/Swiss-Prot;Acc:A6QQL9]|10|ENSBTAG00000014353|ENSBTAT00000019085	11483.2	11311.8	13630.2	15347.3	26323.8	19479.2	34246.4	26911.8
ENSBTAP00000020608	6	6	270.01	0.00491735	2.08122	2;3	2	PWM	unstim	||Uncharacterized protein [Source:UniProtKB/TrEMBL;Acc:F1MJ80]|4|ENSBTAG00000015509|ENSBTAT00000020608	69349.3	76099	79021.8	88662.5	149388	187749	175367	139194
ENSBTAP00000031248	4	3	114.31	0.00493392	1.91985	2;3	2	unstim	PWM	WDFY4|HGNC Symbol|WDFY family member 4 [Source:HGNC Symbol;Acc:29323]|28|ENSBTAG00000023028|ENSBTAT00000031292	25080.8	27333.6	8983.04	11354.4	16095.5	11845.1	3973.29	5980.75
ENSBTAP00000025191	2	2	102.08	0.00498156	1.26754	2;3	2	PWM	unstim	QARS|EntrezGene|glutaminyl-tRNA synthetase [Source:RefSeq peptide;Acc:NP_001029640]|22|ENSBTAG00000018928|ENSBTAT00000025191	62275.3	68687.1	59447.5	60552.6	71871.5	88025.1	78441.3	79767.3
ENSBTAP00000011787	9	9	586.78	0.00503286	1.44011	1;2;3	3	PWM	unstim	A6QPZ6_BOVIN|UniProtKB/TrEMBL|antigen peptide transporter 1 [Source:RefSeq peptide;Acc:NP_001091527]|23|ENSBTAG00000008953|ENSBTAT00000011787	1.4284e+06	1.54359e+06	1.06523e+06	1.51274e+06	2.11364e+06	2.47704e+06	1.45577e+06	1.94611e+06
ENSBTAP00000008498	3	2	85.01	0.00504391	1.60717	2;3	2	PWM	unstim	PTCD3_BOVIN|UniProtKB/Swiss-Prot|Pentatricopeptide repeat-containing protein 3, mitochondrial [Source:UniProtKB/Swiss-Prot;Acc:Q2KI62]|11|ENSBTAG00000006482|ENSBTAT00000008498	15905.6	14623.6	15863.9	19187.1	25223.4	19851.5	29223.2	31100.8
ENSBTAP00000020469	1	1	34.7	0.00506691	3.00475	2	1	unstim	PWM	TPP1|EntrezGene|tripeptidyl-peptidase 1 precursor [Source:RefSeq peptide;Acc:NP_001069186]|15|ENSBTAG00000015403|ENSBTAT00000020469	18112	17013.2	14509.5	16163	7364.6	7087.04	3801.83	3644.47
ENSBTAP00000023183	3	3	125.11	0.00512486	2.1824	2;3	2	PWM	unstim	RL27_BOVIN|UniProtKB/Swiss-Prot|60S ribosomal protein L27 [Source:UniProtKB/Swiss-Prot;Acc:P61356]|19|ENSBTAG00000017441|ENSBTAT00000023183	452105	377549	326662	511097	783618	911040	923071	1.02124e+06
ENSBTAP00000002578	4	3	179.9	0.00516202	1.8189	2;3	2	PWM	unstim	A6H709_BOVIN|UniProtKB/TrEMBL|switch-associated protein 70 [Source:RefSeq peptide;Acc:NP_001073766]|15|ENSBTAG00000001987|ENSBTAT00000002578	33992.5	46200.2	31733.4	41534.3	64664	66605.1	66278.3	81581.4
ENSBTAP00000004656	6	6	223.22	0.00525087	1.81396	2;3	2	PWM	unstim	GSPT1|EntrezGene|eukaryotic peptide chain release factor GTP-binding subunit ERF3A [Source:RefSeq peptide;Acc:NP_001091540]|25|ENSBTAG00000003577|ENSBTAT00000004656	117171	153740	113151	132056	171270	264324	229734	270891
ENSBTAP00000003732	5	5	364.57	0.00527521	1.37441	2	1	unstim	PWM	A5D7U9_BOVIN|UniProtKB/TrEMBL|scavenger mRNA-decapping enzyme DcpS [Source:RefSeq peptide;Acc:NP_777120]|29|ENSBTAG00000002879|ENSBTAT00000003732	365757	300287	322033	437617	288323	218680	246442	283866
ENSBTAP00000027362	2	2	83.51	0.00528685	3.58809	2	1	PWM	unstim	HERC6|HGNC Symbol|hect domain and RLD 6 [Source:HGNC Symbol;Acc:26072]|6|ENSBTAG00000020536|ENSBTAT00000027362	3705.85	5911.58	9091.2	7917.35	18018.7	26197.4	33889.5	17430.7
ENSBTAP00000022761	8	2	357.49	0.00529137	6.18958	2;3	2	PWM	unstim	A4IFC3_BOVIN|UniProtKB/TrEMBL|polyadenylate-binding protein 4 [Source:RefSeq peptide;Acc:NP_001077193]|3|ENSBTAG00000017125|ENSBTAT00000022761	1703.27	1276.04	1543.1	4172.63	8884.9	17334.8	7389.53	20209.5
ENSBTAP00000004181	16	14	842.61	0.00534912	4.52139	2;3	2	PWM	unstim	ASNS_BOVIN|UniProtKB/Swiss-Prot|Asparagine synthetase [glutamine-hydrolyzing] [Source:UniProtKB/Swiss-Prot;Acc:Q1LZA3]|4|ENSBTAG00000003222|ENSBTAT00000004181	285051	284898	324780	271766	687225	1.65813e+06	1.45792e+06	1.4709e+06
ENSBTAP00000020933	3	3	90.06	0.00535001	1.22796	2	1	unstim	PWM	EML2|HGNC Symbol|echinoderm microtubule associated protein like 2 [Source:HGNC Symbol;Acc:18035]|18|ENSBTAG00000015764|ENSBTAT00000020933	85030	97004	87516.6	71463.2	66203	85464.4	68375.1	57665.3
ENSBTAP00000021497	6	6	303.36	0.005354	1.57248	1;2;3	3	PWM	unstim	Q3ZBS7_BOVIN|UniProtKB/TrEMBL|vitronectin [Source:RefSeq peptide;Acc:NP_001030222]|19|ENSBTAG00000016151|ENSBTAT00000021497	565882	1.13194e+06	556293	423798	820632	1.69221e+06	1.05904e+06	639073
ENSBTAP00000001568	13	12	645.7	0.00535991	1.35108	2;3	2	unstim	PWM	F1MBT8_BOVIN|UniProtKB/TrEMBL|septin-7 [Source:RefSeq peptide;Acc:NP_001001168]|4|ENSBTAG00000001182|ENSBTAT00000001568	1.13824e+06	1.24788e+06	1.13365e+06	1.22031e+06	906157	981359	803799	817055
ENSBTAP00000053182	20	19	847.95	0.00539303	1.66366	2;3	2	PWM	unstim	EIF3A|HGNC Symbol|eukaryotic translation initiation factor 3, subunit A [Source:HGNC Symbol;Acc:3271]|26|ENSBTAG00000002528|ENSBTAT00000061515	572884	555638	668697	744361	876325	918820	964765	1.46841e+06
ENSBTAP00000033015	5	1	292.62	0.00539924	2.88363	3	1	PWM	unstim	RS27A_BOVIN|UniProtKB/Swiss-Prot|Ubiquitin-40S ribosomal protein S27aUbiquitin40S ribosomal protein S27a [Source:UniProtKB/Swiss-Prot;Acc:P62992]|11|ENSBTAG00000015473|ENSBTAT00000033091	38419	33351.9	34097.7	73861.2	77474.6	135465	105708	199626
ENSBTAP00000000941	1	1	24.07	0.00545771	2.55316	2	1	unstim	PWM	A3KMY8_BOVIN|UniProtKB/TrEMBL|beta-glucuronidase [Source:RefSeq peptide;Acc:NP_001076905]|25|ENSBTAG00000000704|ENSBTAT00000000941	15884.9	10053.6	10321	10366.3	7389.32	3702.44	2615.98	4554.25
ENSBTAP00000008523	2	2	125.81	0.00549289	2.72482	2;3	2	unstim	PWM	S100A9|EntrezGene|protein S100-A9 [Source:RefSeq peptide;Acc:NP_001039793]|3|ENSBTAG00000006505|ENSBTAT00000008523	192142	103583	142887	150861	60371	52291.9	61571.9	42100.4
ENSBTAP00000019703	15	9	720.32	0.00549343	1.35369	1;2;3	3	unstim	PWM	ATP2A3|EntrezGene|sarcoplasmic/endoplasmic reticulum calcium ATPase 3 [Source:RefSeq peptide;Acc:NP_001107626]|19|ENSBTAG00000014806|ENSBTAT00000019703	325745	315035	297899	296910	222177	255992	229289	205296
ENSBTAP00000009325	4	3	141.08	0.00549928	1.24135	3	1	unstim	PWM	Q1RMQ1_BOVIN|UniProtKB/TrEMBL|protein FRG1 [Source:RefSeq peptide;Acc:NP_001069034]|27|ENSBTAG00000007089|ENSBTAT00000009325	119809	115494	94455	110364	95937.5	92290.2	82647.1	83678.2
ENSBTAP00000053737	29	29	1287.62	0.00553268	1.27741	1;2	2	PWM	unstim	LY75|EntrezGene|lymphocyte antigen 75 [Source:RefSeq peptide;Acc:NP_001001158]|2|ENSBTAG00000017797|ENSBTAT00000061220	1.53898e+06	2.96357e+06	1.64128e+06	1.26704e+06	1.9835e+06	3.73701e+06	1.95799e+06	1.78823e+06
ENSBTAP00000041335;ENSBTAP00000019827;ENSBTAP00000040253	5	5	202.94	0.00555156	1.79437	2;3	2	PWM	unstim	F1MQJ8_BOVIN|UniProtKB/TrEMBL|Uncharacterized protein [Source:UniProtKB/TrEMBL;Acc:F1MQJ8]|22|ENSBTAG00000030941|ENSBTAT00000043791	660934	613980	528282	951024	1.01912e+06	1.31697e+06	1.0764e+06	1.52959e+06
ENSBTAP00000000843	1	1	60	0.00556963	1.35268	2;3	2	unstim	PWM	SKAP1|HGNC Symbol|src kinase associated phosphoprotein 1 [Source:HGNC Symbol;Acc:15605]|19|ENSBTAG00000000641|ENSBTAT00000000843	46683.3	43628	76032	56355.6	30523.2	34882.9	57917.7	41311.5
ENSBTAP00000007832	5	5	246.01	0.00559822	3.04408	2;3	2	PWM	unstim	EIF2S2|EntrezGene|eukaryotic translation initiation factor 2 subunit 2 [Source:RefSeq peptide;Acc:NP_001015621]|13|ENSBTAG00000005969|ENSBTAT00000007832	90924.2	84199.4	90802.1	175384	219404	383246	323746	416984
ENSBTAP00000012544	11	11	544.44	0.00560097	1.622	2;3	2	PWM	unstim	RS2_BOVIN|UniProtKB/Swiss-Prot|40S ribosomal protein S2 [Source:UniProtKB/Swiss-Prot;Acc:O18789]|25|ENSBTAG00000009535|ENSBTAT00000012544	1.13927e+06	1.37334e+06	1.38159e+06	1.21721e+06	1.62273e+06	2.1088e+06	2.19133e+06	2.36786e+06
ENSBTAP00000026215	14	14	488.56	0.00571713	7.82565	1;2;3	3	unstim	PWM	C163A_BOVIN|UniProtKB/Swiss-Prot|Scavenger receptor cysteine-rich type 1 protein M130Soluble CD163 [Source:UniProtKB/Swiss-Prot;Acc:P85521]|5|ENSBTAG00000019669|ENSBTAT00000026215	1.14313e+06	581070	654786	675074	84289.9	167079	70830	68063.7
ENSBTAP00000009158;ENSBTAP00000043991	24	5	1402.55	0.00578003	1.79511	1;2;3	3	PWM	unstim	TBB5_BOVIN|UniProtKB/Swiss-Prot|Tubulin beta-5 chain [Source:UniProtKB/Swiss-Prot;Acc:Q2KJD0]|23|ENSBTAG00000006969|ENSBTAT00000009158	3.04333e+06	3.34571e+06	3.39014e+06	3.35334e+06	4.2587e+06	6.75514e+06	6.27572e+06	6.28471e+06
ENSBTAP00000046840	5	4	135.57	0.00578964	2.40965	2;3	2	unstim	PWM	ARRB2|HGNC Symbol|arrestin, beta 2 [Source:HGNC Symbol;Acc:712]|19|ENSBTAG00000035587|ENSBTAT00000050078	47967.9	50246.4	47621.9	56159.6	21348.9	18681.8	26469.8	17327.3
ENSBTAP00000018370	2	2	117.74	0.00579966	3.64715	2	1	PWM	unstim	A4IFQ7_BOVIN|UniProtKB/TrEMBL|branched-chain-amino-acid aminotransferase, cytosolic [Source:RefSeq peptide;Acc:NP_001077113]|5|ENSBTAG00000013825|ENSBTAT00000018370	5994.13	8778.05	9700.91	6823.35	16264.9	26144.3	31121.4	40612.4
ENSBTAP00000016504	1	1	49.06	0.0058233	3.01468	2	1	PWM	unstim	Q6IE76_BOVIN|UniProtKB/TrEMBL|squalene synthase [Source:RefSeq peptide;Acc:NP_001013022]|8|ENSBTAG00000012432|ENSBTAT00000016504	1228.51	8517.13	5397.26	11238.3	3532.14	34402.6	19302.6	22293.7
ENSBTAP00000024301	41	21	2464.42	0.00585711	1.36361	2;3	2	unstim	PWM	ACTN1_BOVIN|UniProtKB/Swiss-Prot|Alpha-actinin-1 [Source:UniProtKB/Swiss-Prot;Acc:Q3B7N2]|10|ENSBTAG00000018255|ENSBTAT00000024301	3.44133e+06	3.97019e+06	3.14377e+06	3.73513e+06	2.26224e+06	2.80349e+06	2.425e+06	2.98908e+06
ENSBTAP00000052671	7	7	408.62	0.00591246	1.89144	1;2;3	3	unstim	PWM	STOM|EntrezGene|erythrocyte band 7 integral membrane protein [Source:RefSeq peptide;Acc:NP_001098943]|8|ENSBTAG00000038375|ENSBTAT00000052503	2.51075e+06	894979	769263	1.07429e+06	1.56909e+06	412350	385900	407948
ENSBTAP00000049254	5	5	312.89	0.00592036	2.24504	2;3	2	unstim	PWM	Q08E01_BOVIN|UniProtKB/TrEMBL|gamma-adducin [Source:RefSeq peptide;Acc:NP_001068662]|26|ENSBTAG00000003265|ENSBTAT00000053363	361739	395997	304623	378256	130774	187539	181581	141794
ENSBTAP00000009064	17	17	740.82	0.00595436	1.55804	2;3	2	PWM	unstim	EPRS|HGNC Symbol|glutamyl-prolyl-tRNA synthetase [Source:HGNC Symbol;Acc:3418]|16|ENSBTAG00000006898|ENSBTAT00000009064	714410	790614	694490	679562	918957	1.32631e+06	1.1485e+06	1.09196e+06
ENSBTAP00000049614	2	2	116.95	0.00613393	2.44527	2;3	2	PWM	unstim	EIF4G2|EntrezGene|eukaryotic translation initiation factor 4 gamma 2 [Source:RefSeq peptide;Acc:NP_001093329]|15|ENSBTAG00000020308|ENSBTAT00000055320	8386.71	20877.2	18750.3	18950.8	28048.7	50868.5	51193.3	33636.9
ENSBTAP00000029336	6	6	173.39	0.00614297	2.38688	2;3	2	unstim	PWM	B7TYH9_BOVIN|UniProtKB/TrEMBL|Mitochondrial carnitine palmitoyltransferase 1A [Source:UniProtKB/TrEMBL;Acc:B7TYH9]|29|ENSBTAG00000021999|ENSBTAT00000029336	261861	289029	181765	163290	145313	119720	61790.7	48538.9
ENSBTAP00000032885	3	3	125.58	0.00615445	1.79228	3	1	unstim	PWM	ZN512_BOVIN|UniProtKB/Swiss-Prot|Zinc finger protein 512 [Source:UniProtKB/Swiss-Prot;Acc:A4FV61]|11|ENSBTAG00000003902|ENSBTAT00000032958	195204	187691	136421	154299	126231	114051	60821.6	74738.2
ENSBTAP00000005983	10	9	596.36	0.006171	1.4133	2;3	2	unstim	PWM	CAPZB_BOVIN|UniProtKB/Swiss-Prot|F-actin-capping protein subunit beta [Source:UniProtKB/Swiss-Prot;Acc:P79136]|2|ENSBTAG00000004554|ENSBTAT00000005983	2.01944e+06	2.57295e+06	1.92178e+06	1.95194e+06	1.58893e+06	1.84413e+06	1.35677e+06	1.20048e+06
ENSBTAP00000029007	1	1	52.01	0.00619625	1.50904	3	1	PWM	unstim	ZC3HF_BOVIN|UniProtKB/Swiss-Prot|Zinc finger CCCH domain-containing protein 15 [Source:UniProtKB/Swiss-Prot;Acc:Q1RMM1]|2|ENSBTAG00000021762|ENSBTAT00000029007	16015.6	23162.3	15894.1	22951.8	21396.1	40396.9	23396.6	32551.6
ENSBTAP00000000184	3	3	76.38	0.00625572	14.6661	2	1	PWM	unstim	CBS|EntrezGene|cystathionine beta-synthase [Source:RefSeq peptide;Acc:NP_001095470]|1|ENSBTAG00000000160|ENSBTAT00000000184	1640.35	946.648	1048.53	932.589	7382.43	20844.4	17829.1	20940.6
ENSBTAP00000040998	7	7	273.52	0.00626331	1.64678	2	1	unstim	PWM	PGM1_BOVIN|UniProtKB/Swiss-Prot|Phosphoglucomutase-1 [Source:UniProtKB/Swiss-Prot;Acc:Q08DP0]|3|ENSBTAG00000019011|ENSBTAT00000043425	238698	239790	215582	238148	147971	118483	131882	167748
ENSBTAP00000000046	5	3	195.09	0.00627077	7.52429	2;3	2	PWM	unstim	P5CR1_BOVIN|UniProtKB/Swiss-Prot|Pyrroline-5-carboxylate reductase 1, mitochondrial [Source:UniProtKB/Swiss-Prot;Acc:Q58DT4]|19|ENSBTAG00000000042|ENSBTAT00000000046	4967.6	2787.46	7962.02	4907.5	24276.3	47555.1	39082.6	44271.2
ENSBTAP00000020715	17	17	753.42	0.00630126	4.35892	2;3	2	PWM	unstim	A6H7F8_BOVIN|UniProtKB/TrEMBL|DNA replication licensing factor MCM5 [Source:RefSeq peptide;Acc:NP_001068758]|5|ENSBTAG00000015595|ENSBTAT00000020715	152520	217709	204716	245965	335130	1.06587e+06	1.07224e+06	1.10504e+06
ENSBTAP00000046653	1	1	35.77	0.00634316	5.1362	2	1	PWM	unstim	MAD2|EntrezGene|mitotic checkpoint component Mad2 [Source:RefSeq peptide;Acc:NP_001073264]|6|ENSBTAG00000035129|ENSBTAT00000049820	1249.13	5292.21	2649.12	2294.86	6144.98	16254.2	13654.3	22937.4
ENSBTAP00000009998	13	12	454.91	0.00639134	2.64853	2	1	PWM	unstim	FKBP4|EntrezGene|peptidyl-prolyl cis-trans isomerase FKBP4 [Source:RefSeq peptide;Acc:NP_001029494]|5|ENSBTAG00000007605|ENSBTAT00000009998	163810	216911	157269	209926	279286	601109	436823	663660
ENSBTAP00000052801;ENSBTAP00000031094	3	2	163.61	0.00639476	9.72387	2	1	PWM	unstim	||Uncharacterized protein [Source:UniProtKB/TrEMBL;Acc:F1N1I1]|3|ENSBTAG00000038625|ENSBTAT00000054825	2814.61	4586.04	8938.15	6976.54	58272.4	44850.4	94963.7	28628.9
ENSBTAP00000004739	1	1	81.31	0.00641185	1.93396	2	1	PWM	unstim	CISD1_BOVIN|UniProtKB/Swiss-Prot|CDGSH iron-sulfur domain-containing protein 1 [Source:UniProtKB/Swiss-Prot;Acc:Q3ZBU2]|26|ENSBTAG00000003634|ENSBTAT00000004739	9868.94	25032.9	14657	17553	25940.3	47225.2	27890.1	28735.8
ENSBTAP00000000097	10	10	383.88	0.0064232	3.05823	1	1	PWM	unstim	ALCAM|EntrezGene|CD166 antigen precursor [Source:RefSeq peptide;Acc:NP_776663]|1|ENSBTAG00000000088|ENSBTAT00000000097	152494	485535	174913	144858	468732	1.03292e+06	761772	665742
ENSBTAP00000014072	8	8	303.02	0.00647086	1.11657	1;2;3	3	PWM	unstim	Q95111_BOVIN|UniProtKB/TrEMBL|HLA class II histocompatibility antigen, DR alpha chain [Source:RefSeq peptide;Acc:NP_001012695]|23|ENSBTAG00000010645|ENSBTAT00000014072	1.08034e+06	3.92976e+06	967689	1.28585e+06	1.28445e+06	4.26086e+06	1.1035e+06	1.46155e+06
ENSBTAP00000014997	3	3	61.83	0.00647937	3.97195	2	1	unstim	PWM	LIPA|EntrezGene|lysosomal acid lipase/cholesteryl ester hydrolase [Source:RefSeq peptide;Acc:NP_001096793]|26|ENSBTAG00000003636|ENSBTAT00000014997	112077	83112.9	49751.2	97637.2	41706.6	12547.7	7119.43	24875.7
ENSBTAP00000002600	16	16	550.59	0.00660308	3.03203	1;3	2	unstim	PWM	THBS1|EntrezGene|thrombospondin-1 precursor [Source:RefSeq peptide;Acc:NP_776621]|10|ENSBTAG00000002006|ENSBTAT00000002600	423087	646205	606190	502046	216572	159703	208893	133006
ENSBTAP00000037062	3	3	121.8	0.00666565	1.50938	3	1	unstim	PWM	LRCH4|EntrezGene|leucine-rich repeat and calponin homology domain-containing protein 4 [Source:RefSeq peptide;Acc:NP_001076919]|25|ENSBTAG00000003160|ENSBTAT00000037224	44280.4	67338	50422.9	34009.5	24040	48663.3	35378	21807.5
ENSBTAP00000047423	7	7	236.33	0.00668074	1.72579	2	1	unstim	PWM	GBE1|EntrezGene|glucan (1,4-alpha-), branching enzyme 1 [Source:RefSeq peptide;Acc:NP_001116201]|1|ENSBTAG00000036262|ENSBTAT00000050765	137879	186902	181514	144162	94874.9	100800	88286.5	92943.1
ENSBTAP00000022232	3	3	105.66	0.00674512	1.55247	2	1	unstim	PWM	NPEPL1|EntrezGene|probable aminopeptidase NPEPL1 [Source:RefSeq peptide;Acc:NP_001029469]|13|ENSBTAG00000016724|ENSBTAT00000022232	37042	36487.9	38689.1	48751.7	19512	24249.5	27827.4	32097.9
ENSBTAP00000010280	1	1	31.9	0.00675238	3.67359	3	1	unstim	PWM	BRCC3|EntrezGene|lys-63-specific deubiquitinase BRCC36 [Source:RefSeq peptide;Acc:NP_001069258]|X|ENSBTAG00000007817|ENSBTAT00000010280	4404.99	12877	1949.64	2711.71	1118.35	2950.62	954.612	949.675
ENSBTAP00000002582	1	1	61.56	0.00679771	1.8553	2	1	PWM	unstim	CP51A_BOVIN|UniProtKB/Swiss-Prot|Lanosterol 14-alpha demethylase [Source:UniProtKB/Swiss-Prot;Acc:Q4PJW3]|4|ENSBTAG00000001992|ENSBTAT00000002582	6138.13	10290.5	6551.52	11455.5	9181.71	19844.9	10297.7	24564.3
ENSBTAP00000020323	7	6	231.32	0.00682464	1.50747	2;3	2	PWM	unstim	RL32_BOVIN|UniProtKB/Swiss-Prot|60S ribosomal protein L32 [Source:UniProtKB/Swiss-Prot;Acc:Q3SZQ6]|22|ENSBTAG00000015283|ENSBTAT00000020323	384109	424152	339006	509682	485618	712304	528864	771010
ENSBTAP00000000289;ENSBTAP00000050261	11	8	740.01	0.00689346	1.41056	1;2;3	3	unstim	PWM	1433Z_BOVIN|UniProtKB/Swiss-Prot|14-3-3 protein zeta/delta [Source:UniProtKB/Swiss-Prot;Acc:P63103]|14|ENSBTAG00000000236|ENSBTAT00000000289	5.36271e+06	6.32504e+06	5.25076e+06	5.21519e+06	4.00912e+06	4.15995e+06	3.37479e+06	4.16174e+06
ENSBTAP00000052422	18	18	971.09	0.00695201	1.75856	1;2;3	3	PWM	unstim	Q6KDN8_BOVIN|UniProtKB/TrEMBL|Heat shock 70kDa protein 5 [Source:UniProtKB/TrEMBL;Acc:Q6KDN8]|11|ENSBTAG00000007662|ENSBTAT00000057533	2.71355e+06	5.85313e+06	2.76078e+06	3.63632e+06	5.99728e+06	8.4036e+06	4.94243e+06	6.9714e+06
ENSBTAP00000007723	10	10	263.84	0.00712307	1.77665	1;2	2	PWM	unstim	A5D7E6_BOVIN|UniProtKB/TrEMBL|CD82 molecule [Source:RefSeq peptide;Acc:NP_001091459]|15|ENSBTAG00000031252|ENSBTAT00000007723	941956	1.35869e+06	901362	601275	1.31302e+06	2.81667e+06	1.61427e+06	1.01315e+06
ENSBTAP00000002666	3	3	89.64	0.00714245	1.82235	2;3	2	PWM	unstim	RL19_BOVIN|UniProtKB/Swiss-Prot|60S ribosomal protein L19 [Source:UniProtKB/Swiss-Prot;Acc:Q3T0W9]|19|ENSBTAG00000002060|ENSBTAT00000002666	100569	93576.2	77605.5	121715	147614	203242	161116	205060
ENSBTAP00000001838	20	13	943.81	0.00715738	1.27965	1;2;3	3	PWM	unstim	ATP2A2|HGNC Symbol|ATPase, Ca++ transporting, cardiac muscle, slow twitch 2 [Source:HGNC Symbol;Acc:812]|17|ENSBTAG00000001398|ENSBTAT00000001838	428009	521824	510112	476749	585700	609520	635149	647913
ENSBTAP00000037804	11	11	346.53	0.00719115	1.51384	2;3	2	PWM	unstim	EIF3D_BOVIN|UniProtKB/Swiss-Prot|Eukaryotic translation initiation factor 3 subunit D [Source:UniProtKB/Swiss-Prot;Acc:Q3T122]|5|ENSBTAG00000001988|ENSBTAT00000037985	376257	352258	336091	515062	476858	534194	572377	807935
ENSBTAP00000026118	10	8	606.8	0.00721824	1.15951	2;3	2	PWM	unstim	LDHB_BOVIN|UniProtKB/Swiss-Prot|L-lactate dehydrogenase B chain [Source:UniProtKB/Swiss-Prot;Acc:Q5E9B1]|5|ENSBTAG00000019603|ENSBTAT00000026118	3.59042e+06	5.83174e+06	5.00336e+06	4.55095e+06	4.1567e+06	6.73283e+06	5.51293e+06	5.60089e+06
ENSBTAP00000018691;ENSBTAP00000044243	10	8	563.21	0.0072434	1.41249	2;3	2	unstim	PWM	VDAC3_BOVIN|UniProtKB/Swiss-Prot|Voltage-dependent anion-selective channel protein 3 [Source:UniProtKB/Swiss-Prot;Acc:Q9MZ13]|27|ENSBTAG00000014068|ENSBTAT00000018691	1.26902e+06	1.05323e+06	913024	1.04548e+06	1.0061e+06	763824	558932	701797
ENSBTAP00000000814	4	4	258.54	0.00728272	1.71735	2;3	2	PWM	unstim	F1MSH2_BOVIN|UniProtKB/TrEMBL|40S ribosomal protein S17 [Source:RefSeq peptide;Acc:NP_001092680]|21|ENSBTAG00000000622|ENSBTAT00000000814	461470	233089	273026	571435	691757	450032	598034	903217
ENSBTAP00000007471	4	4	180.91	0.0074411	1.8142	1	1	PWM	unstim	GP183_BOVIN|UniProtKB/Swiss-Prot|G-protein coupled receptor 183 [Source:UniProtKB/Swiss-Prot;Acc:Q1RMI1]|12|ENSBTAG00000032084|ENSBTAT00000007471	207115	190775	214644	141476	304885	311052	458311	293676
ENSBTAP00000048068	4	1	183.09	0.00760634	1.68064	1;2;3	3	PWM	unstim	F1MGC3_BOVIN|UniProtKB/TrEMBL|major histocompatibility complex, class I [Source:RefSeq peptide;Acc:NP_001070309]|23|ENSBTAG00000038619|ENSBTAT00000052679	99990	77371.7	115426	268003	143871	111073	173405	514137
ENSBTAP00000022338	1	1	20.04	0.00779617	8.36074	3	1	PWM	unstim	Q08DL6_BOVIN|UniProtKB/TrEMBL|peroxisomal biogenesis factor 7 [Source:RefSeq peptide;Acc:NP_001070358]|9|ENSBTAG00000016791|ENSBTAT00000022338	2200.36	1405.06	13203.4	702.347	18924.6	3972.9	115902	7606.92
ENSBTAP00000049933	1	1	33.82	0.00782769	1.75373	2	1	unstim	PWM	A8E4R1_BOVIN|UniProtKB/TrEMBL|tetratricopeptide repeat protein 38 [Source:RefSeq peptide;Acc:NP_001098729]|5|ENSBTAG00000003017|ENSBTAT00000056392	4718.63	5840.29	3455.28	6658.1	2745.3	2800.55	1602.33	4639.44
ENSBTAP00000028049;ENSBTAP00000028051	8	6	250.66	0.00783834	1.851	3	1	unstim	PWM	SMRD2_BOVIN|UniProtKB/Swiss-Prot|SWI/SNF-related matrix-associated actin-dependent regulator of chromatin subfamily D member 2 [Source:UniProtKB/Swiss-Prot;Acc:E1BJD1]|19|ENSBTAG00000021062|ENSBTAT00000028049	225067	235750	181826	169284	126168	117432	123304	71738.6
ENSBTAP00000001368	1	1	47.33	0.00786778	2.13853	2	1	unstim	PWM	RASGRP2|EntrezGene|RAS guanyl-releasing protein 2 [Source:RefSeq peptide;Acc:NP_001093416]|29|ENSBTAG00000001029|ENSBTAT00000001368	14118.4	11176.8	17372.2	19535	6127.26	5079.48	5810.38	12069.5
ENSBTAP00000052226	10	1	521.33	0.00787168	2.00307	2;3	2	PWM	unstim	A2VE06_BOVIN|UniProtKB/TrEMBL|40S ribosomal protein S4 [Source:RefSeq peptide;Acc:NP_001075891]|23|ENSBTAG00000025617|ENSBTAT00000036142	84607.5	89534.5	122899	133165	192865	128879	245948	294040
ENSBTAP00000028494	7	7	391.64	0.00788841	1.2232	2;3	2	PWM	unstim	A7MBD4_BOVIN|UniProtKB/TrEMBL|phenylalanyl-tRNA synthetase alpha chain [Source:RefSeq peptide;Acc:NP_001094577]|7|ENSBTAG00000021374|ENSBTAT00000028494	308674	289304	287241	374766	357399	358793	332346	492669
ENSBTAP00000020326	6	6	298.69	0.00791092	1.83114	2;3	2	PWM	unstim	RS8_BOVIN|UniProtKB/Swiss-Prot|40S ribosomal protein S8 [Source:UniProtKB/Swiss-Prot;Acc:Q5E958]|3|ENSBTAG00000015285|ENSBTAT00000020326	1.37075e+06	1.31463e+06	1.03334e+06	1.60392e+06	2.01782e+06	2.52131e+06	2.41159e+06	2.79579e+06
ENSBTAP00000025617	3	3	172.07	0.00792679	1.25675	1;2	2	PWM	unstim	TXNDC5|HGNC Symbol|thioredoxin domain containing 5 (endoplasmic reticulum) [Source:HGNC Symbol;Acc:21073]|23|ENSBTAG00000019237|ENSBTAT00000025617	119081	146566	76093.7	68792.4	164140	175537	95117.6	81143.2
ENSBTAP00000003691	5	5	197.72	0.0079446	1.21553	2;3	2	unstim	PWM	TRAF3IP3|EntrezGene|TRAF3 interacting protein 3 isoform 1 [Source:RefSeq peptide;Acc:NP_001106716]|16|ENSBTAG00000002846|ENSBTAT00000003691	102157	218666	166207	168534	91583.8	170168	137488	140086
ENSBTAP00000035103	3	3	142.09	0.00798519	1.72847	2;3	2	unstim	PWM	M2OM_BOVIN|UniProtKB/Swiss-Prot|Mitochondrial 2-oxoglutarate/malate carrier protein [Source:UniProtKB/Swiss-Prot;Acc:P22292]|19|ENSBTAG00000004910|ENSBTAT00000035225	101614	185912	86033.5	99973.3	68743.4	89950	47362.9	67903.8
ENSBTAP00000000353	1	1	39.07	0.00806236	3.90364	1	1	PWM	unstim	CSF1|EntrezGene|macrophage colony-stimulating factor 1 [Source:RefSeq peptide;Acc:NP_776451]|3|ENSBTAG00000000283|ENSBTAT00000000353	1987.35	4504.2	1719.35	2241.15	7180.61	12033.2	13167	8420.28
ENSBTAP00000045734	5	5	265.86	0.00807881	1.88244	2;3	2	PWM	unstim	A4IFE6_BOVIN|UniProtKB/TrEMBL|ATP-binding cassette sub-family E member 1 [Source:RefSeq peptide;Acc:NP_001077154]|17|ENSBTAG00000019854|ENSBTAT00000048747	108777	105104	124324	108300	172208	173955	229139	265215
ENSBTAP00000028385	6	6	234.39	0.00815179	1.28819	2	1	unstim	PWM	ACSF2_BOVIN|UniProtKB/Swiss-Prot|Acyl-CoA synthetase family member 2, mitochondrial [Source:UniProtKB/Swiss-Prot;Acc:Q17QJ1]|19|ENSBTAG00000021301|ENSBTAT00000028385	284258	285470	422239	414841	238242	234635	326872	292335
ENSBTAP00000022946	1	1	23.51	0.00818345	1.42	2	1	PWM	unstim	VBP1|EntrezGene|prefoldin subunit 3 [Source:RefSeq peptide;Acc:NP_001033605]|X|ENSBTAG00000017265|ENSBTAT00000022946	4789.62	5545.33	3884.62	7346.49	7725.65	7184.31	6095.46	9618.42
ENSBTAP00000014282	7	7	287.72	0.00819465	2.14375	1	1	PWM	unstim	TNR6_BOVIN|UniProtKB/Swiss-Prot|Tumor necrosis factor receptor superfamily member 6 [Source:UniProtKB/Swiss-Prot;Acc:P51867]|26|ENSBTAG00000010785|ENSBTAT00000014282	299921	842173	377952	250473	664965	1.39732e+06	939731	793519
ENSBTAP00000009363	2	2	80.07	0.00830756	1.83477	2;3	2	unstim	PWM	E1BKZ1_BOVIN|UniProtKB/TrEMBL|glutathione reductase [Source:RefSeq peptide;Acc:NP_001107662]|27|ENSBTAG00000007115|ENSBTAT00000009363	73653.3	122974	81517.3	96085	51393.4	69540.6	40672.6	42358.9
ENSBTAP00000015277	16	13	894.07	0.0083132	2.1135	2	1	unstim	PWM	PYGL_BOVIN|UniProtKB/Swiss-Prot|Glycogen phosphorylase, liver form [Source:UniProtKB/Swiss-Prot;Acc:Q0VCM4]|10|ENSBTAG00000011494|ENSBTAT00000015277	1.05039e+06	891527	954305	955591	694680	381782	376366	369652
ENSBTAP00000025659;ENSBTAP00000054389	14	14	657.55	0.00845535	1.64025	2;3	2	PWM	unstim	F1MKH6_BOVIN|UniProtKB/TrEMBL|asparaginyl-tRNA synthetase, cytoplasmic [Source:RefSeq peptide;Acc:NP_001040037]|24|ENSBTAG00000019271|ENSBTAT00000025659	690997	791645	832729	960935	969997	1.22547e+06	1.67979e+06	1.49872e+06
ENSBTAP00000021451	10	7	455.14	0.00846121	1.63117	1;2;3	3	PWM	unstim	F1N4Y5_BOVIN|UniProtKB/TrEMBL|non-classical MHC class I antigen [Source:RefSeq peptide;Acc:NP_001099086]|23|ENSBTAG00000019386|ENSBTAT00000021451	1.66911e+06	1.6766e+06	539368	577282	2.52353e+06	2.52729e+06	964706	1.26335e+06
ENSBTAP00000012234	1	1	34.19	0.00848203	1.23746	2	1	unstim	PWM	Q3ZBT8_BOVIN|UniProtKB/TrEMBL|3-beta-hydroxysteroid-Delta(8),Delta(7)-isomerase [Source:RefSeq peptide;Acc:NP_001029672]|X|ENSBTAG00000009287|ENSBTAT00000012234	10820.6	18375.8	14569.7	14701.6	8055.7	15210.9	11173	12808.7
ENSBTAP00000042353	5	5	148.4	0.0086209	7.93939	3	1	PWM	unstim	A7E320_BOVIN|UniProtKB/TrEMBL|E3 ubiquitin-protein ligase UHRF1 [Source:RefSeq peptide;Acc:NP_001096568]|7|ENSBTAG00000002224|ENSBTAT00000044908	9939.44	14636.3	8299.94	10129.3	34430.6	81173.9	125573	100256
ENSBTAP00000012810	1	1	87.53	0.00864746	1.14825	1;2;3	3	unstim	PWM	USMG5_BOVIN|UniProtKB/Swiss-Prot|Up-regulated during skeletal muscle growth protein 5 [Source:UniProtKB/Swiss-Prot;Acc:Q3ZBI7]|26|ENSBTAG00000009713|ENSBTAT00000012810	210062	273512	177127	175258	187314	245788	152908	142021
ENSBTAP00000003394	1	1	115.4	0.00872805	1.36681	2	1	PWM	unstim	Q3ZBW8_BOVIN|UniProtKB/TrEMBL|SAM domain-containing protein SAMSN-1 [Source:RefSeq peptide;Acc:NP_001030481]|1|ENSBTAG00000002623|ENSBTAT00000003394	10294.8	16627.6	12989.2	14318	13218.4	20342.1	18807.1	21754.1
ENSBTAP00000021386	8	3	430.56	0.00873259	1.18309	2	1	unstim	PWM	ARF4_BOVIN|UniProtKB/Swiss-Prot|ADP-ribosylation factor 4 [Source:UniProtKB/Swiss-Prot;Acc:Q3SZF2]|22|ENSBTAG00000016069|ENSBTAT00000021386	254395	285987	268486	264834	222482	240357	210332	234366
ENSBTAP00000005323	1	1	26.45	0.00877105	3.75918	2	1	PWM	unstim	IDI1_BOVIN|UniProtKB/Swiss-Prot|Isopentenyl-diphosphate Delta-isomerase 1 [Source:UniProtKB/Swiss-Prot;Acc:Q1LZ95]|13|ENSBTAG00000004075|ENSBTAT00000005323	2705.66	5373.41	6359.1	6128.63	7069.62	32474.7	22286.1	15483.9
ENSBTAP00000028254	4	4	160.91	0.00881941	2.24009	2	1	PWM	unstim	Q148I4_BOVIN|UniProtKB/TrEMBL|cytosolic acyl coenzyme A thioester hydrolase [Source:RefSeq peptide;Acc:NP_001069150]|16|ENSBTAG00000021202|ENSBTAT00000028254	29320.5	33603.7	42566.8	42127.1	48689.9	101073	99103.2	81810.9
ENSBTAP00000053922	3	3	192.99	0.00888872	5.68312	1;2	2	unstim	PWM	LGMN|EntrezGene|legumain precursor [Source:RefSeq peptide;Acc:NP_776526]|21|ENSBTAG00000046979|ENSBTAT00000065983	188673	239691	204143	286866	72124.2	29395	19879.3	40374.2
ENSBTAP00000008296	1	1	32.92	0.00889966	2.35622	3	1	PWM	unstim	SNX9|HGNC Symbol|sorting nexin 9 [Source:HGNC Symbol;Acc:14973]|9|ENSBTAG00000006323|ENSBTAT00000008296	5176.04	3001.08	8484.71	6133.27	9744.95	10252.9	22018.8	11693.6
ENSBTAP00000018762	5	5	174.6	0.0089073	1.75403	2;3	2	PWM	unstim	SRPR_BOVIN|UniProtKB/Swiss-Prot|Signal recognition particle receptor subunit alpha [Source:UniProtKB/Swiss-Prot;Acc:Q3MHE8]|29|ENSBTAG00000014105|ENSBTAT00000018762	34750.5	54703	45857.2	59693.2	67984.8	72817.6	88362.4	112879
ENSBTAP00000011678	19	19	795.1	0.00898912	1.39697	1;2;3	3	unstim	PWM	CAN1_BOVIN|UniProtKB/Swiss-Prot|Calpain-1 catalytic subunit [Source:UniProtKB/Swiss-Prot;Acc:Q27970]|29|ENSBTAG00000010230|ENSBTAT00000011678	1.45992e+06	904477	1.05117e+06	1.0415e+06	959068	649904	880285	701258
ENSBTAP00000020825;ENSBTAP00000020838	17	17	874.01	0.00900526	1.62794	2;3	2	PWM	unstim	E1BBY7_BOVIN|UniProtKB/TrEMBL|heat shock 70kDa protein 4 [Source:RefSeq peptide;Acc:NP_001107664]|7|ENSBTAG00000015683|ENSBTAT00000020825	506320	680442	541027	592550	701558	1.03856e+06	851051	1.18621e+06
ENSBTAP00000023750	1	1	28.83	0.00902405	2.751	1	1	unstim	PWM	CD36_BOVIN|UniProtKB/Swiss-Prot|Platelet glycoprotein 4 [Source:UniProtKB/Swiss-Prot;Acc:P26201]|4|ENSBTAG00000017866|ENSBTAT00000023750	51266.5	25093.5	24738.5	18624.1	15325.6	13812.1	6585.36	7796.53
ENSBTAP00000003728	18	17	726.66	0.00905859	3.68327	2;3	2	PWM	unstim	MCM7_BOVIN|UniProtKB/Swiss-Prot|DNA replication licensing factor MCM7 [Source:UniProtKB/Swiss-Prot;Acc:Q3ZBH9]|25|ENSBTAG00000030965|ENSBTAT00000003728	222015	315413	210242	288193	422786	1.19256e+06	1.0131e+06	1.18692e+06
ENSBTAP00000014472;ENSBTAP00000009272	2	2	80.4	0.00911581	2.87106	2	1	PWM	unstim	FPPS_BOVIN|UniProtKB/Swiss-Prot|Farnesyl pyrophosphate synthase [Source:UniProtKB/Swiss-Prot;Acc:Q8WMY2]|3|ENSBTAG00000003948|ENSBTAT00000014472	217984	197204	317090	235238	673618	896118	693883	514178
ENSBTAP00000013405	3	3	137.84	0.00915312	1.67461	2	1	PWM	unstim	TOM22_BOVIN|UniProtKB/Swiss-Prot|Mitochondrial import receptor subunit TOM22 homolog [Source:UniProtKB/Swiss-Prot;Acc:A6QPI6]|5|ENSBTAG00000010157|ENSBTAT00000013405	58871.1	81398.5	58754.9	89953.1	88464.1	166296	102989	126175
ENSBTAP00000019121	20	20	974.15	0.00915586	4.38865	2;3	2	PWM	unstim	MCM2|HGNC Symbol|minichromosome maintenance complex component 2 [Source:HGNC Symbol;Acc:6944]|22|ENSBTAG00000014380|ENSBTAT00000019121	235691	294010	257720	352086	476672	1.5159e+06	1.38531e+06	1.62302e+06
ENSBTAP00000021634	1	1	88.92	0.0091962	1.58377	2	1	PWM	unstim	Q05B91_BOVIN|UniProtKB/TrEMBL|Uncharacterized protein [Source:UniProtKB/TrEMBL;Acc:F1N2P6]|7|ENSBTAG00000016264|ENSBTAT00000021634	10469.5	19166.6	14026	15513.2	18382.7	25666.7	26579.4	23091.2
ENSBTAP00000005015	2	2	97.83	0.00920057	4.51179	2;3	2	PWM	unstim	RL37A_BOVIN|UniProtKB/Swiss-Prot|60S ribosomal protein L37a [Source:UniProtKB/Swiss-Prot;Acc:Q3MIC0]|2|ENSBTAG00000003846|ENSBTAT00000005015	5514.29	5956.23	15582.2	9708.27	34577.5	37661.3	34239.2	59379.6
ENSBTAP00000009803;ENSBTAP00000007086;ENSBTAP00000020266	7	7	335.14	0.00923857	1.6678	2;3	2	PWM	unstim	RL10_BOVIN|UniProtKB/Swiss-Prot|60S ribosomal protein L10 [Source:UniProtKB/Swiss-Prot;Acc:Q9XSI3]|X|ENSBTAG00000007454|ENSBTAT00000009803	591927	552956	566934	756111	822010	1.15015e+06	956573	1.18727e+06
ENSBTAP00000011257	1	1	31.83	0.0092759	2.00492	2;3	2	unstim	PWM	MGST1|EntrezGene|microsomal glutathione S-transferase 1 [Source:RefSeq peptide;Acc:NP_001007816]|5|ENSBTAG00000008541|ENSBTAT00000011257	34617.8	43500.4	40318.4	28979.1	19064.7	26086.1	18419.1	9956.84
ENSBTAP00000054069	1	1	47.31	0.00930312	1.68114	2	1	PWM	unstim	|||17|ENSBTAG00000046005|ENSBTAT00000063988	29771	30443	44388.5	26866.2	48613.8	65072.1	61988.7	45342.4
ENSBTAP00000022936	4	4	94.7	0.00933218	1.37096	1	1	PWM	unstim	Q148M9_BOVIN|UniProtKB/TrEMBL|T-cell surface antigen CD2 [Source:RefSeq peptide;Acc:NP_001011676]|3|ENSBTAG00000017256|ENSBTAT00000022936	198450	303015	295364	137476	245676	401142	414230	219844
ENSBTAP00000036314	4	4	150.23	0.00937062	3.726	1	1	PWM	unstim	TNFSF8|EntrezGene|tumor necrosis factor ligand superfamily member 8 [Source:RefSeq peptide;Acc:NP_001020378]|8|ENSBTAG00000025782|ENSBTAT00000036456	17288.1	98960.7	28566.3	27280.2	94059.5	210715	173511	162942
ENSBTAP00000022759	6	6	345.54	0.00938876	1.51209	2;3	2	PWM	unstim	PHB_BOVIN|UniProtKB/Swiss-Prot|Prohibitin [Source:UniProtKB/Swiss-Prot;Acc:Q3T165]|19|ENSBTAG00000017120|ENSBTAT00000022759	527003	916286	598744	610538	866617	1.4868e+06	736696	920821
ENSBTAP00000019639	6	6	198.44	0.00939493	2.86406	3	1	PWM	unstim	ISG20|HGNC Symbol|interferon stimulated exonuclease gene 20kDa [Source:HGNC Symbol;Acc:6130]|21|ENSBTAG00000014762|ENSBTAT00000019639	70270.3	86574.6	88473.1	67084.9	294803	234931	160360	204645
ENSBTAP00000047178	2	2	81.16	0.00941614	2.14311	1;3	2	unstim	PWM	TNFAIP2|HGNC Symbol|tumor necrosis factor, alpha-induced protein 2 [Source:HGNC Symbol;Acc:11895]|21|ENSBTAG00000035995|ENSBTAT00000050485	46408.9	23090.1	64995.4	11366.4	21743.5	9521.62	28855.3	7940.09
ENSBTAP00000048625	12	12	429.55	0.00945241	3.89573	2;3	2	PWM	unstim	MCM6|EntrezGene|DNA replication licensing factor MCM6 [Source:RefSeq peptide;Acc:NP_001039699]|2|ENSBTAG00000015172|ENSBTAT00000055538	96697.7	136034	113782	129994	181756	599480	489739	585373
ENSBTAP00000020644;ENSBTAP00000002436	9	7	360.61	0.00947122	2.36566	2;3	2	unstim	PWM	A5PJY9_BOVIN|UniProtKB/TrEMBL|copine-3 [Source:RefSeq peptide;Acc:NP_001092612]|14|ENSBTAG00000015536|ENSBTAT00000020644	598159	617989	534847	723175	286975	185911	311467	261518
ENSBTAP00000001520	3	3	98.2	0.00950568	2.26075	2;3	2	PWM	unstim	GNE|HGNC Symbol|glucosamine (UDP-N-acetyl)-2-epimerase/N-acetylmannosamine kinase [Source:HGNC Symbol;Acc:23657]|8|ENSBTAG00000001142|ENSBTAT00000001520	11618.1	13252.7	13162.4	14081.6	18214.6	28939	39238.7	31426.2
ENSBTAP00000015381	10	10	406.47	0.00962799	1.71595	1	1	PWM	unstim	Q0VD03_BOVIN|UniProtKB/TrEMBL|CD44 antigen [Source:RefSeq peptide;Acc:NP_776438]|15|ENSBTAG00000011578|ENSBTAT00000015381	2.87435e+06	4.72113e+06	4.27086e+06	2.86579e+06	4.30503e+06	6.86867e+06	8.0037e+06	6.10225e+06
ENSBTAP00000041236	24	23	1306.44	0.00965873	1.45317	1;2;3	3	unstim	PWM	SAMH1_BOVIN|UniProtKB/Swiss-Prot|SAM domain and HD domain-containing protein 1 [Source:UniProtKB/Swiss-Prot;Acc:Q0VCA5]|13|ENSBTAG00000022007|ENSBTAT00000043682	9.86097e+06	1.00599e+07	1.35031e+07	7.7531e+06	7.5553e+06	7.31485e+06	7.85085e+06	5.61508e+06
ENSBTAP00000044213	6	6	257.23	0.00968276	1.95338	2;3	2	PWM	unstim	RL15_BOVIN|UniProtKB/Swiss-Prot|60S ribosomal protein L15 [Source:UniProtKB/Swiss-Prot;Acc:Q5EAD6]|27|ENSBTAG00000033080|ENSBTAT00000020729	298479	246536	327956	243029	462566	430327	653016	634070
ENSBTAP00000043205;ENSBTAP00000003855	7	3	370.74	0.00974628	1.33895	2;3	2	PWM	unstim	A7Z085_BOVIN|UniProtKB/TrEMBL|WD repeat-containing protein 82 [Source:RefSeq peptide;Acc:NP_001098929]|22|ENSBTAG00000002960|ENSBTAT00000045850	69885.1	53522.1	111706	81135	97723.6	73945.1	130782	120992
ENSBTAP00000018795	4	4	174.95	0.00977289	2.04192	1	1	PWM	unstim	AT1B3_BOVIN|UniProtKB/Swiss-Prot|Sodium/potassium-transporting ATPase subunit beta-3 [Source:UniProtKB/Swiss-Prot;Acc:Q3T0C6]|1|ENSBTAG00000014140|ENSBTAT00000018795	483629	750700	536138	338345	815119	1.75073e+06	861159	879023
ENSBTAP00000001290	15	14	651.67	0.00981781	2.42323	2;3	2	PWM	unstim	A7MBC5_BOVIN|UniProtKB/TrEMBL|isoleucyl-tRNA synthetase, cytoplasmic [Source:RefSeq peptide;Acc:NP_001094539]|8|ENSBTAG00000000974|ENSBTAT00000001290	313023	296342	287570	309596	484110	834444	841445	763704
ENSBTAP00000018997	9	9	485.52	0.00985244	2.90045	2;3	2	PWM	unstim	MOV10_BOVIN|UniProtKB/Swiss-Prot|Putative helicase MOV-10 [Source:UniProtKB/Swiss-Prot;Acc:Q0V8H6]|3|ENSBTAG00000014297|ENSBTAT00000018997	130766	118896	110282	126847	265438	318573	511445	316458
ENSBTAP00000025397	2	2	50.29	0.00995196	1.35905	2	1	unstim	PWM	DAD1_BOVIN|UniProtKB/Swiss-Prot|Dolichyl-diphosphooligosaccharide--protein glycosyltransferase subunit DAD1 [Source:UniProtKB/Swiss-Prot;Acc:Q5E9C2]|10|ENSBTAG00000019077|ENSBTAT00000025397	134825	171846	131261	171222	86280.7	128284	91552.3	142104
ENSBTAP00000005648	1	1	25.17	0.0100121	4.04554	2	1	PWM	unstim	A3KMX6_BOVIN|UniProtKB/TrEMBL|ubiquitin protein ligase E3 component n-recognin 7 (putative) [Source:RefSeq peptide;Acc:NP_001076070]|21|ENSBTAG00000004310|ENSBTAT00000005648	284.495	776.58	213.381	724.08	1001.19	2272.3	1961.09	2850.56
ENSBTAP00000000047	5	3	253.59	0.0100164	2.29003	2;3	2	PWM	unstim	P5CR2_BOVIN|UniProtKB/Swiss-Prot|Pyrroline-5-carboxylate reductase 2 [Source:UniProtKB/Swiss-Prot;Acc:Q17QJ7]|16|ENSBTAG00000005835|ENSBTAT00000000047	28689.1	42757.5	38041.9	60639.1	44300.4	126550	86843.4	131903
ENSBTAP00000008774	15	10	864.62	0.0100229	1.971	2;3	2	PWM	unstim	SYNCRIP|HGNC Symbol|synaptotagmin binding, cytoplasmic RNA interacting protein [Source:HGNC Symbol;Acc:16918]|9|ENSBTAG00000006672|ENSBTAT00000008774	977462	1.41725e+06	1.42016e+06	1.64734e+06	1.82649e+06	3.73082e+06	2.1789e+06	3.0298e+06
ENSBTAP00000015105	3	3	75.6	0.0100522	6.49272	3	1	PWM	unstim	NOC3L|EntrezGene|nucleolar complex protein 3 homolog [Source:RefSeq peptide;Acc:NP_001091477]|26|ENSBTAG00000011368|ENSBTAT00000015105	6509.67	2198.32	7454.21	3856.24	15956.8	13128.5	73032.6	27856.3
ENSBTAP00000030179	65	60	3550.15	0.0100642	1.7582	2;3	2	unstim	PWM	Q95LH5_BOVIN|UniProtKB/TrEMBL|Uncharacterized protein [Source:UniProtKB/TrEMBL;Acc:F1N169]|X|ENSBTAG00000011190|ENSBTAT00000030194	9.51491e+06	1.075e+07	1.21747e+07	6.68885e+06	7.11741e+06	5.72846e+06	6.21169e+06	3.19725e+06
ENSBTAP00000055576	1	1	37.82	0.0101204	1.58394	2	1	unstim	PWM	SCAM4_BOVIN|UniProtKB/Swiss-Prot|Secretory carrier-associated membrane protein 4 [Source:UniProtKB/Swiss-Prot;Acc:Q58DF6]|7|ENSBTAG00000045762|ENSBTAT00000065646	16951.5	35115.6	17230.8	17485.6	12837.7	23044.3	8964.25	9943.43
ENSBTAP00000022017	6	5	276.99	0.0102224	1.4099	2;3	2	unstim	PWM	|||29|ENSBTAG00000016551|ENSBTAT00000022017	680641	617997	713658	587116	548507	377821	479427	437932
ENSBTAP00000012866	9	8	447.73	0.0102268	1.37871	2;3	2	PWM	unstim	RSSA_BOVIN|UniProtKB/Swiss-Prot|40S ribosomal protein SA [Source:UniProtKB/Swiss-Prot;Acc:P26452]|22|ENSBTAG00000009757|ENSBTAT00000012866	1.55094e+06	2.71976e+06	1.65943e+06	1.72067e+06	1.97889e+06	3.39839e+06	2.45787e+06	2.71304e+06
ENSBTAP00000026100	8	8	261.19	0.0104091	1.28854	1;2	2	PWM	unstim	BLA-DQB|EntrezGene|BOLA class II histocompatibility antigen, DQB*0101 beta chain precursor [Source:RefSeq peptide;Acc:NP_001029840]|23|ENSBTAG00000019588|ENSBTAT00000026100	526754	789444	368481	408364	770613	971714	454508	500130
ENSBTAP00000054935	1	1	68	0.0104822	1.24905	1;2	2	PWM	unstim	|||23|ENSBTAG00000046839|ENSBTAT00000065907	27734.9	36432.5	20759.7	14181.3	38235	44160.6	24782.4	16613.4
ENSBTAP00000036691	2	1	57.34	0.010515	5.12635	2	1	PWM	unstim	Q56JY8_BOVIN|UniProtKB/TrEMBL|transcription factor BTF3 [Source:RefSeq peptide;Acc:NP_001020485]|20|ENSBTAG00000010012|ENSBTAT00000036839	1039.96	11869	5138.37	11640	15623.7	38080.3	39834.1	58649.9
ENSBTAP00000019861	1	1	50.29	0.0106618	1.59137	3	1	unstim	PWM	E1BC94_BOVIN|UniProtKB/TrEMBL|Uncharacterized protein [Source:UniProtKB/TrEMBL;Acc:E1BC94]|7|ENSBTAG00000014918|ENSBTAT00000019861	8123.09	9154.66	7173.14	7830.1	5646.82	5480.58	3559.52	5598.16
ENSBTAP00000012872;ENSBTAP00000001262	15	15	781.62	0.0106723	1.46317	2;3	2	unstim	PWM	ACTR2|EntrezGene|actin-related protein 2 [Source:RefSeq peptide;Acc:NP_001095683]|11|ENSBTAG00000009761|ENSBTAT00000012872	6.82415e+06	7.66286e+06	7.2168e+06	6.72568e+06	5.40696e+06	4.4228e+06	5.17576e+06	4.42453e+06
ENSBTAP00000052105;ENSBTAP00000005143	3	3	152.27	0.0107434	1.7347	2;3	2	PWM	unstim	RS13_BOVIN|UniProtKB/Swiss-Prot|40S ribosomal protein S13 [Source:UniProtKB/Swiss-Prot;Acc:Q56JX8]|15|ENSBTAG00000040308|ENSBTAT00000055693	627240	656404	1.04823e+06	790711	1.21093e+06	1.13768e+06	1.40195e+06	1.66618e+06
ENSBTAP00000003764	2	1	136.18	0.0107554	2.44901	2;3	2	PWM	unstim	IMA7_BOVIN|UniProtKB/Swiss-Prot|Importin subunit alpha-7 [Source:UniProtKB/Swiss-Prot;Acc:Q0V7M0]|1|ENSBTAG00000002896|ENSBTAT00000003764	15322.4	10129.1	15188	20266.1	24003	23879.6	48793.4	52482.4
ENSBTAP00000027870;ENSBTAP00000001407	8	8	236.36	0.0108629	1.35179	2;3	2	unstim	PWM	KPCB_BOVIN|UniProtKB/Swiss-Prot|Protein kinase C beta type [Source:UniProtKB/Swiss-Prot;Acc:P05126]|25|ENSBTAG00000020921|ENSBTAT00000027870	333542	255817	332151	276652	227210	218207	251483	189452
ENSBTAP00000010765	14	8	697.25	0.0109091	2.62795	1;2;3	3	PWM	unstim	CCT6A|HGNC Symbol|chaperonin containing TCP1, subunit 6A (zeta 1) [Source:HGNC Symbol;Acc:1620]|25|ENSBTAG00000008184|ENSBTAT00000010765	265144	305754	253350	262236	1.07499e+06	659254	491321	629667
ENSBTAP00000010400	1	1	35.47	0.0109853	1.69639	1	1	unstim	PWM	NOTCH2|HGNC Symbol|notch 2 [Source:HGNC Symbol;Acc:7882]|3|ENSBTAG00000007909|ENSBTAT00000010400	4459.83	6180.17	7240.93	2711.35	1907.23	4192.7	4581.85	1457.07
ENSBTAP00000017905	4	4	188.09	0.0110425	1.41844	2;3	2	PWM	unstim	RL24_BOVIN|UniProtKB/Swiss-Prot|60S ribosomal protein L24 [Source:UniProtKB/Swiss-Prot;Acc:Q862I1]|1|ENSBTAG00000013461|ENSBTAT00000017905	338023	434015	377589	485375	536520	605005	451667	725962
ENSBTAP00000036650	5	4	194.75	0.0112046	3.30843	1;2;3	3	unstim	PWM	CATB_BOVIN|UniProtKB/Swiss-Prot|Cathepsin BCathepsin B light chainCathepsin B heavy chain [Source:UniProtKB/Swiss-Prot;Acc:P07688]|8|ENSBTAG00000012442|ENSBTAT00000036795	658896	361705	489854	388671	266669	143627	77139	86590.2
ENSBTAP00000012341	1	1	56.92	0.011231	1.34616	2;3	2	unstim	PWM	OVCA2_BOVIN|UniProtKB/Swiss-Prot|Ovarian cancer-associated gene 2 protein homolog [Source:UniProtKB/Swiss-Prot;Acc:Q3SZ07]|19|ENSBTAG00000047926|ENSBTAT00000012341	21946.7	25590.4	18357.3	26596.2	15794.8	17484.8	15935.1	19492.1
ENSBTAP00000016432;ENSBTAP00000044680;ENSBTAP00000053231	18	15	833.73	0.0112906	1.40022	1;2	2	PWM	unstim	Q5W5U3_BOVIN|UniProtKB/TrEMBL|hexokinase 1 [Source:RefSeq peptide;Acc:NP_001012686]|28|ENSBTAG00000012380|ENSBTAT00000016432	793441	709233	783090	694854	964137	1.15018e+06	1.11612e+06	943093
ENSBTAP00000035273	1	1	47.27	0.0113244	2.25582	3	1	PWM	unstim	CTR9|HGNC Symbol|Ctr9, Paf1/RNA polymerase II complex component, homolog (S. cerevisiae) [Source:HGNC Symbol;Acc:16850]|15|ENSBTAG00000015566|ENSBTAT00000035398	4188.88	4396.56	10312.8	3750.37	8948.17	9125.11	19209.3	13808.7
ENSBTAP00000009098	8	8	348.8	0.0113477	2.09151	2;3	2	PWM	unstim	E1BGH0_BOVIN|UniProtKB/TrEMBL|Uncharacterized protein [Source:UniProtKB/TrEMBL;Acc:E1BGH0]|23|ENSBTAG00000006927|ENSBTAT00000009098	104058	69686.6	53109	153601	165403	172553	160486	297282
ENSBTAP00000014273	11	10	409.69	0.0113693	2.31991	2;3	2	PWM	unstim	A4FUC8_BOVIN|UniProtKB/TrEMBL|cysteinyl-tRNA synthetase, cytoplasmic [Source:RefSeq peptide;Acc:NP_001096719]|29|ENSBTAG00000010777|ENSBTAT00000014273	254761	256277	191630	324101	538339	573639	695081	574950
ENSBTAP00000032626	13	7	709.75	0.0113909	5.01284	2;3	2	PWM	unstim	||Uncharacterized protein [Source:UniProtKB/TrEMBL;Acc:E1B7Z4]|3|ENSBTAG00000001143|ENSBTAT00000032697	106252	117391	110530	103542	507468	896923	569896	219909
ENSBTAP00000022212	3	3	142.97	0.0115509	1.59573	2;3	2	PWM	unstim	PTH2_BOVIN|UniProtKB/Swiss-Prot|Peptidyl-tRNA hydrolase 2, mitochondrial [Source:UniProtKB/Swiss-Prot;Acc:Q3ZBL5]|19|ENSBTAG00000016710|ENSBTAT00000022212	85414.6	98747.7	67364.2	90706.7	117845	185758	118610	123900
ENSBTAP00000002609	2	1	62.01	0.0115668	1.39119	2	1	PWM	unstim	SNX1|EntrezGene|sorting nexin-1 [Source:RefSeq peptide;Acc:NP_001039572]|10|ENSBTAG00000002014|ENSBTAT00000002609	6302.43	11565.7	10448	9763.51	9645.57	16079.1	12348.4	14902.9
ENSBTAP00000037066;ENSBTAP00000010915	8	8	365.08	0.0115981	1.34994	3	1	unstim	PWM	A4IFJ8_BOVIN|UniProtKB/TrEMBL|actin-like protein 6A [Source:RefSeq peptide;Acc:NP_001098505]|1|ENSBTAG00000002460|ENSBTAT00000037228	379255	453881	517884	300144	282129	301418	382208	257383
ENSBTAP00000001132	2	2	71.38	0.0116439	2.06917	2	1	unstim	PWM	CP20A_BOVIN|UniProtKB/Swiss-Prot|Cytochrome P450 20A1 [Source:UniProtKB/Swiss-Prot;Acc:Q5E980]|2|ENSBTAG00000000851|ENSBTAT00000001132	11973.9	17265.4	12113.3	13373.5	7346.03	6088.01	5179.28	7834.99
ENSBTAP00000031070	16	16	882.04	0.0116496	2.52292	2;3	2	unstim	PWM	CNDP2_BOVIN|UniProtKB/Swiss-Prot|Cytosolic non-specific dipeptidase [Source:UniProtKB/Swiss-Prot;Acc:Q3ZC84]|24|ENSBTAG00000009841|ENSBTAT00000031107	1.58418e+06	1.79675e+06	1.45414e+06	1.63257e+06	1.01349e+06	585858	449286	514916
ENSBTAP00000021980	1	1	20.24	0.011701	2.13121	3	1	PWM	unstim	NOC2L_BOVIN|UniProtKB/Swiss-Prot|Nucleolar complex protein 2 homolog [Source:UniProtKB/Swiss-Prot;Acc:Q3SYU1]|16|ENSBTAG00000016528|ENSBTAT00000021980	6870.31	5378.77	8843.43	6738.73	9942.19	14120.9	21573.2	13678
ENSBTAP00000048183	9	9	537.26	0.0117441	1.41204	2;3	2	PWM	unstim	F1MDN4_BOVIN|UniProtKB/TrEMBL|60S acidic ribosomal protein P0 [Source:RefSeq peptide;Acc:NP_001012700]|17|ENSBTAG00000017389|ENSBTAT00000055086	2.40661e+06	2.9598e+06	2.39256e+06	2.47104e+06	2.88854e+06	4.15131e+06	3.87967e+06	3.52567e+06
ENSBTAP00000003559	12	11	724.94	0.0117854	1.58366	2;3	2	unstim	PWM	APEX1|EntrezGene|DNA-(apurinic or apyrimidinic site) lyase [Source:RefSeq peptide;Acc:NP_788782]|10|ENSBTAG00000002745|ENSBTAT00000003559	6.25823e+06	7.07736e+06	5.54456e+06	6.89411e+06	4.64571e+06	3.55788e+06	3.7747e+06	4.29684e+06
ENSBTAP00000034715	19	3	719.35	0.0118394	1.35184	2;3	2	PWM	unstim	STAT5A|EntrezGene|signal transducer and activator of transcription 5A [Source:RefSeq peptide;Acc:NP_001012691]|19|ENSBTAG00000009496|ENSBTAT00000034831	73232.7	90302.3	92608.4	86376.7	97011.8	105305	138977	121738
ENSBTAP00000043789	3	3	133.82	0.0118835	1.23859	1	1	PWM	unstim	APOD|EntrezGene|apolipoprotein D precursor [Source:RefSeq peptide;Acc:NP_001069769]|1|ENSBTAG00000023600|ENSBTAT00000046493	292603	452710	279084	219514	332398	607254	327686	273354
ENSBTAP00000003072	5	5	219.58	0.0118976	1.34649	2	1	PWM	unstim	PSB2_BOVIN|UniProtKB/Swiss-Prot|Proteasome subunit beta type-2 [Source:UniProtKB/Swiss-Prot;Acc:Q5E9K0]|3|ENSBTAG00000002377|ENSBTAT00000003072	150888	227043	164758	202593	217318	288941	253117	244138
ENSBTAP00000014336	1	1	21.48	0.0119298	3.8541	2	1	PWM	unstim	Q148H3_BOVIN|UniProtKB/TrEMBL|calcium/calmodulin-dependent protein kinase kinase 2 [Source:RefSeq peptide;Acc:NP_001068858]|17|ENSBTAG00000010815|ENSBTAT00000014336	3445.07	2743.72	6060.7	4843.18	10709.9	21676.2	20851.6	12639.2
ENSBTAP00000013467	4	4	130.03	0.0119612	1.29527	2;3	2	PWM	unstim	CPSF5_BOVIN|UniProtKB/Swiss-Prot|Cleavage and polyadenylation specificity factor subunit 5 [Source:UniProtKB/Swiss-Prot;Acc:Q3ZCA2]|18|ENSBTAG00000010207|ENSBTAT00000013467	124607	162229	143925	128809	147676	236644	177176	163297
ENSBTAP00000010703	1	1	78.44	0.0119832	4.2327	2;3	2	PWM	unstim	IFIH1|HGNC Symbol|interferon induced with helicase C domain 1 [Source:HGNC Symbol;Acc:18873]|2|ENSBTAG00000008142|ENSBTAT00000010703	2360.57	6572.97	3209.86	6189.35	15360.6	15985.1	25365.5	20885.8
ENSBTAP00000002160;ENSBTAP00000043847;ENSBTAP00000051012;ENSBTAP00000051381	3	3	149.3	0.0120031	2.43026	2;3	2	PWM	unstim	Q861S4_BOVIN|UniProtKB/TrEMBL|Similar to ribosomal protein L21Uncharacterized protein [Source:UniProtKB/TrEMBL;Acc:Q861S4]|12|ENSBTAG00000001648|ENSBTAT00000002160	181960	162002	254247	201179	406792	388285	423778	723868
ENSBTAP00000009681	9	9	337.13	0.012111	1.37761	2;3	2	unstim	PWM	A6QQR5_BOVIN|UniProtKB/TrEMBL|transmembrane protein 43 [Source:RefSeq peptide;Acc:NP_001095950]|22|ENSBTAG00000007360|ENSBTAT00000009681	319990	294412	309537	255792	257511	190278	204307	204266
ENSBTAP00000054151;ENSBTAP00000016111	12	4	639.32	0.0121202	1.21769	1;2;3	3	unstim	PWM	PPP1CA|EntrezGene|serine/threonine-protein phosphatase PP1-alpha catalytic subunit [Source:RefSeq peptide;Acc:NP_001030393]|1|ENSBTAG00000040418|ENSBTAT00000045897	103229	113924	112180	97447.6	93820.1	92498.9	89457.7	74707.2
ENSBTAP00000010469	7	7	346.18	0.0121241	1.48434	2;3	2	unstim	PWM	ARPC4_BOVIN|UniProtKB/Swiss-Prot|Actin-related protein 2/3 complex subunit 4 [Source:UniProtKB/Swiss-Prot;Acc:Q148J6]|22|ENSBTAG00000007964|ENSBTAT00000010469	3.95038e+06	4.81252e+06	4.10807e+06	3.91148e+06	3.10865e+06	2.97141e+06	2.9896e+06	2.23668e+06
ENSBTAP00000042875	1	1	25.39	0.0121413	3.33059	3	1	PWM	unstim	ATXN2L|HGNC Symbol|ataxin 2-like [Source:HGNC Symbol;Acc:31326]|25|ENSBTAG00000032087|ENSBTAT00000045493	2603.1	5685.81	2098.99	5762.84	8565.38	12884.9	4283.27	28058
ENSBTAP00000002513	2	2	124.87	0.0121923	1.73663	3	1	unstim	PWM	Q08DN5_BOVIN|UniProtKB/TrEMBL|carnitine O-acetyltransferase [Source:RefSeq peptide;Acc:NP_001069055]|11|ENSBTAG00000001932|ENSBTAT00000002513	110907	139002	67822.8	93270	75855.9	65043.3	47170.2	48596.7
ENSBTAP00000014888	3	3	141.81	0.0122383	1.40912	2;3	2	PWM	unstim	EIF3K_BOVIN|UniProtKB/Swiss-Prot|Eukaryotic translation initiation factor 3 subunit K [Source:UniProtKB/Swiss-Prot;Acc:Q3T0V3]|18|ENSBTAG00000011212|ENSBTAT00000014888	110473	188613	120014	128595	165498	242719	151390	212161
ENSBTAP00000020806;ENSBTAP00000007432	7	7	331.75	0.0122904	3.23429	1;2	2	PWM	unstim	B2M0T2_BOVIN|UniProtKB/TrEMBL|ATP-binding cassette transporter subfamily B member 1 [Source:UniProtKB/TrEMBL;Acc:B2M0T2]|4|ENSBTAG00000005997|ENSBTAT00000020806	63010.6	150565	76276	60693.8	138374	347042	337930	310420
ENSBTAP00000020859	2	2	53.87	0.0126039	1.33033	2;3	2	unstim	PWM	CD3E_BOVIN|UniProtKB/Swiss-Prot|T-cell surface glycoprotein CD3 epsilon chain [Source:UniProtKB/Swiss-Prot;Acc:Q28073]|15|ENSBTAG00000015710|ENSBTAT00000020859	50982.5	71803	54485.1	69978.7	38380.7	61138.7	40620	45716.2
ENSBTAP00000002882	8	6	294.18	0.0127096	1.60237	2;3	2	PWM	unstim	PUF60|EntrezGene|poly(U)-binding-splicing factor PUF60 [Source:RefSeq peptide;Acc:NP_001039598]|14|ENSBTAG00000037493|ENSBTAT00000002882	199354	206057	185292	333831	298414	430762	283362	468905
ENSBTAP00000005581	36	36	1864.27	0.0127857	1.60119	1;2;3	3	PWM	unstim	EF2_BOVIN|UniProtKB/Swiss-Prot|Elongation factor 2 [Source:UniProtKB/Swiss-Prot;Acc:Q3SYU2]|7|ENSBTAG00000004258|ENSBTAT00000005581	7.78979e+06	9.81992e+06	8.07318e+06	8.37079e+06	9.52694e+06	1.69732e+07	1.33906e+07	1.46358e+07
ENSBTAP00000028046	4	4	186.79	0.0128127	1.53729	2;3	2	PWM	unstim	E1BJD2_BOVIN|UniProtKB/TrEMBL|Uncharacterized protein [Source:UniProtKB/TrEMBL;Acc:E1BJD2]|19|ENSBTAG00000021058|ENSBTAT00000028046	71357.6	73465.6	77706.4	108511	100105	109593	150796	148412
ENSBTAP00000026815	2	2	59.61	0.0129845	2.34979	3	1	PWM	unstim	CD027_BOVIN|UniProtKB/Swiss-Prot|UPF0609 protein C4orf27 homolog [Source:UniProtKB/Swiss-Prot;Acc:A2VDY4]|8|ENSBTAG00000020132|ENSBTAT00000026815	14478.2	10270.8	23062.4	12489.4	27391.3	19217.7	49768.3	45317.1
ENSBTAP00000002767	7	7	225.77	0.0130125	3.38448	1	1	PWM	unstim	Q95MQ1_BOVIN|UniProtKB/TrEMBL|early activation antigen CD69 [Source:RefSeq peptide;Acc:NP_776439]|5|ENSBTAG00000002135|ENSBTAT00000002767	118823	415524	130175	108051	470054	790184	785517	569007
ENSBTAP00000026632	1	1	54.43	0.0130858	1.55488	2	1	PWM	unstim	CK073_BOVIN|UniProtKB/Swiss-Prot|Uncharacterized protein C11orf73 homolog [Source:UniProtKB/Swiss-Prot;Acc:Q56JY0]|29|ENSBTAG00000019995|ENSBTAT00000026632	5001.46	12407.9	9634.18	8922.22	9850.17	17842.1	12840.6	15389.7
ENSBTAP00000004188;ENSBTAP00000012541	11	10	582.74	0.0131071	2.12018	2;3	2	PWM	unstim	RL3_BOVIN|UniProtKB/Swiss-Prot|60S ribosomal protein L3 [Source:UniProtKB/Swiss-Prot;Acc:P39872]|5|ENSBTAG00000003228|ENSBTAT00000004188	1.0018e+06	848694	942683	1.18317e+06	1.51846e+06	1.49662e+06	2.55303e+06	2.86246e+06
ENSBTAP00000015525	1	1	28.85	0.0131512	1.84175	2	1	PWM	unstim	TIM23_BOVIN|UniProtKB/Swiss-Prot|Mitochondrial import inner membrane translocase subunit Tim23 [Source:UniProtKB/Swiss-Prot;Acc:A4IFL0]|28|ENSBTAG00000011694|ENSBTAT00000015525	7136.73	14189.2	11707.6	14442.6	17114.4	19588	24859.6	25877.3
ENSBTAP00000008593	6	1	330.97	0.0131676	1.43818	1;2;3	3	PWM	unstim	ATP2A1|EntrezGene|sarcoplasmic/endoplasmic reticulum calcium ATPase 1 [Source:RefSeq peptide;Acc:NP_001069235]|25|ENSBTAG00000006541|ENSBTAT00000008593	125726	179972	142148	156677	189371	270169	226055	183815
ENSBTAP00000011029;ENSBTAP00000056154	7	7	289.93	0.0132048	1.55363	2;3	2	unstim	PWM	Q52ZH3_BOVIN|UniProtKB/TrEMBL|calpastatin isoform I [Source:RefSeq peptide;Acc:NP_001025489]|7|ENSBTAG00000000874|ENSBTAT00000011029	257175	247962	290812	268882	206587	131974	179858	166963
ENSBTAP00000019765	3	3	130.26	0.0132058	3.58819	2	1	unstim	PWM	GBA|EntrezGene|glucosylceramidase precursor [Source:RefSeq peptide;Acc:NP_001039886]|3|ENSBTAG00000014841|ENSBTAT00000019765	72514.7	72299.6	58961.1	54422.6	35593.7	10737.9	10528.7	15097.4
ENSBTAP00000014924	10	10	543.91	0.0132828	1.54448	1	1	PWM	unstim	Q2KHZ6_BOVIN|UniProtKB/TrEMBL|CD48 antigen [Source:RefSeq peptide;Acc:NP_001039467]|3|ENSBTAG00000011238|ENSBTAT00000014924	3.26461e+06	6.09845e+06	4.02661e+06	2.4311e+06	4.82112e+06	8.30372e+06	6.32727e+06	4.98275e+06
ENSBTAP00000009208	63	50	3057.93	0.0133329	1.67152	2;3	2	unstim	PWM	SPTBN1|HGNC Symbol|spectrin, beta, non-erythrocytic 1 [Source:HGNC Symbol;Acc:11275]|11|ENSBTAG00000006995|ENSBTAT00000009208	3.45449e+06	3.72405e+06	3.46047e+06	3.00628e+06	1.98023e+06	1.8206e+06	2.70821e+06	1.65436e+06
ENSBTAP00000029249	2	2	50.82	0.0133483	1.74545	2	1	PWM	unstim	ELAC2|HGNC Symbol|elaC homolog 2 (E. coli) [Source:HGNC Symbol;Acc:14198]|19|ENSBTAG00000021939|ENSBTAT00000029249	5748.25	18339.1	13686.1	12815.5	11872.8	28602.5	19275.6	28549.4
ENSBTAP00000007938	1	1	45.58	0.0133639	2.67344	1	1	PWM	unstim	Q27999_BOVIN|UniProtKB/TrEMBL|sodium- and chloride-dependent glycine transporter 1 [Source:RefSeq peptide;Acc:NP_777037]|3|ENSBTAG00000008690|ENSBTAT00000007938	4461.9	14166.1	4314.05	4488.96	13422.1	23806.9	18466	17640.2
ENSBTAP00000048220	4	3	88.04	0.0134351	1.36829	3	1	PWM	unstim	DDX27_BOVIN|UniProtKB/Swiss-Prot|Probable ATP-dependent RNA helicase DDX27 [Source:UniProtKB/Swiss-Prot;Acc:A1A4H6]|13|ENSBTAG00000006671|ENSBTAT00000057089	19814.1	16352.1	20798.9	20026.8	22899.6	24025.6	28355.9	30066.1
ENSBTAP00000011083	2	2	45.32	0.0135633	2.03001	2;3	2	unstim	PWM	ABR_BOVIN|UniProtKB/Swiss-Prot|Active breakpoint cluster region-related protein [Source:UniProtKB/Swiss-Prot;Acc:A6QNS3]|19|ENSBTAG00000008424|ENSBTAT00000011083	50581.6	50540.8	44504.5	52478.4	35130.8	19827.3	22737.7	19892.7
ENSBTAP00000029086	9	9	652.2	0.013568	1.46213	1	1	PWM	unstim	A6QNW8_BOVIN|UniProtKB/TrEMBL|CD97 antigen precursor [Source:RefSeq peptide;Acc:NP_788834]|7|ENSBTAG00000021818|ENSBTAT00000029086	1.62827e+06	1.68977e+06	1.96995e+06	1.16053e+06	2.43749e+06	2.18141e+06	2.69739e+06	2.1123e+06
ENSBTAP00000013024;ENSBTAP00000033374	16	16	586.47	0.0136602	1.51433	1	1	PWM	unstim	C4BPA_BOVIN|UniProtKB/Swiss-Prot|C4b-binding protein alpha chain [Source:UniProtKB/Swiss-Prot;Acc:Q28065]|16|ENSBTAG00000009876|ENSBTAT00000013024	633087	1.24561e+06	562262	473267	927830	1.68637e+06	1.10922e+06	689662
ENSBTAP00000005730	8	8	369.07	0.0137115	1.21704	2;3	2	PWM	unstim	CISY_BOVIN|UniProtKB/Swiss-Prot|Citrate synthase, mitochondrial [Source:UniProtKB/Swiss-Prot;Acc:Q29RK1]|5|ENSBTAG00000004371|ENSBTAT00000005730	1.03657e+06	1.66114e+06	1.27463e+06	1.07154e+06	1.4009e+06	1.99131e+06	1.43037e+06	1.31602e+06
ENSBTAP00000038128	9	8	303.84	0.0137605	1.61205	2;3	2	PWM	unstim	Q2LGB8_BOVIN|UniProtKB/TrEMBL|caspase-8 [Source:RefSeq peptide;Acc:NP_001039435]|2|ENSBTAG00000015718|ENSBTAT00000038313	170431	160859	161921	165453	209455	285920	293837	272589
ENSBTAP00000002225	1	1	71.14	0.0137732	1.16459	2;3	2	PWM	unstim	TRA2B_BOVIN|UniProtKB/Swiss-Prot|Transformer-2 protein homolog beta [Source:UniProtKB/Swiss-Prot;Acc:Q3ZBT6]|1|ENSBTAG00000001697|ENSBTAT00000002225	273898	236842	387608	295524	314652	262189	440171	373362
ENSBTAP00000000147	3	3	137.72	0.0139126	1.23553	2;3	2	unstim	PWM	Q148D6_BOVIN|UniProtKB/TrEMBL|mannose-P-dolichol utilization defect 1 protein [Source:RefSeq peptide;Acc:NP_001068647]|19|ENSBTAG00000000134|ENSBTAT00000000147	173601	211120	154708	176644	147074	152398	131819	148278
ENSBTAP00000015172	18	18	1072.28	0.0139417	1.68668	1;2;3	3	PWM	unstim	GRP75_BOVIN|UniProtKB/Swiss-Prot|Stress-70 protein, mitochondrial [Source:UniProtKB/Swiss-Prot;Acc:Q3ZCH0]|7|ENSBTAG00000011419|ENSBTAT00000015172	1.66415e+06	1.75581e+06	1.58357e+06	2.14025e+06	2.36333e+06	3.88779e+06	2.48357e+06	3.31456e+06
ENSBTAP00000040403	3	3	65.04	0.0139958	1.20201	1	1	PWM	unstim	Q2KII3_BOVIN|UniProtKB/TrEMBL|hepatitis A virus cellular receptor 1 [Source:RefSeq peptide;Acc:NP_001039988]|7|ENSBTAG00000030297|ENSBTAT00000042779	148858	424013	209141	202520	193217	496446	268688	225070
ENSBTAP00000001190	17	14	706.96	0.0140265	1.48346	2;3	2	unstim	PWM	IQGAP2|HGNC Symbol|IQ motif containing GTPase activating protein 2 [Source:HGNC Symbol;Acc:6111]|10|ENSBTAG00000000897|ENSBTAT00000001190	763568	504389	690340	591424	451188	337822	573691	356066
ENSBTAP00000008502	8	7	185.14	0.0140421	1.52054	2;3	2	PWM	unstim	RS9_BOVIN|UniProtKB/Swiss-Prot|40S ribosomal protein S9 [Source:UniProtKB/Swiss-Prot;Acc:A6QLG5]|18|ENSBTAG00000006487|ENSBTAT00000008502	848104	909857	906251	804185	1.01779e+06	1.39044e+06	1.55445e+06	1.31116e+06
ENSBTAP00000030260	6	6	181.82	0.0140799	2.10285	2;3	2	PWM	unstim	A8KC77_BOVIN|UniProtKB/TrEMBL|Uncharacterized protein [Source:UniProtKB/TrEMBL;Acc:F1N0F7]|21|ENSBTAG00000016282|ENSBTAT00000030275	54538.1	53485.6	64190.5	59795.7	102401	99408.5	104142	181929
ENSBTAP00000042411;ENSBTAP00000056179	8	8	450.11	0.0140976	1.34388	2;3	2	PWM	unstim	RL6_BOVIN|UniProtKB/Swiss-Prot|60S ribosomal protein L6 [Source:UniProtKB/Swiss-Prot;Acc:Q58DQ3]|17|ENSBTAG00000031723|ENSBTAT00000033359	1.09396e+06	1.18058e+06	980690	1.11074e+06	1.30689e+06	1.46442e+06	1.43379e+06	1.66223e+06
ENSBTAP00000029211	4	2	167.94	0.0141198	1.61715	3	1	unstim	PWM	TBL1XR1|HGNC Symbol|transducin (beta)-like 1 X-linked receptor 1 [Source:HGNC Symbol;Acc:29529]|1|ENSBTAG00000021910|ENSBTAT00000029211	21830.5	113872	62775.5	15742.6	9415.08	69323.6	45698.2	8031.32
ENSBTAP00000050939	6	6	328.74	0.0141768	1.58219	2;3	2	PWM	unstim	CSNK2A1|EntrezGene|casein kinase II subunit alpha [Source:RefSeq peptide;Acc:NP_777060]|13|ENSBTAG00000012341|ENSBTAT00000057062	297492	352681	323453	317219	506341	429664	586605	519753
ENSBTAP00000020809;ENSBTAP00000033643	10	10	402.03	0.0143481	1.40255	2;3	2	PWM	unstim	STIP1_BOVIN|UniProtKB/Swiss-Prot|Stress-induced-phosphoprotein 1 [Source:UniProtKB/Swiss-Prot;Acc:Q3ZBZ8]|29|ENSBTAG00000015663|ENSBTAT00000020809	224465	311103	228992	309699	300913	446673	269396	489722
ENSBTAP00000035425	4	4	170.42	0.0143748	1.95489	2	1	PWM	unstim	Q3T0G3_BOVIN|UniProtKB/TrEMBL|activator of 90 kDa heat shock protein ATPase homolog 1 [Source:RefSeq peptide;Acc:NP_001029838]|10|ENSBTAG00000020477|ENSBTAT00000035554	68113.6	80250.6	64453.6	102520	89044.2	163770	143633	220004
ENSBTAP00000025179	11	10	453.55	0.0144563	1.90993	2;3	2	PWM	unstim	IMDH2_BOVIN|UniProtKB/Swiss-Prot|Inosine-5'-monophosphate dehydrogenase 2 [Source:UniProtKB/Swiss-Prot;Acc:Q3SWY3]|22|ENSBTAG00000031837|ENSBTAT00000025179	204364	284377	237178	311295	308780	735776	393207	543239
ENSBTAP00000003414	3	3	139.55	0.014523	6.77355	3	1	unstim	PWM	PGRP1_BOVIN|UniProtKB/Swiss-Prot|Peptidoglycan recognition protein 1 [Source:UniProtKB/Swiss-Prot;Acc:Q8SPP7]|18|ENSBTAG00000002635|ENSBTAT00000003414	485809	532458	58046.9	61856	125275	32073.6	1784.69	8898.16
ENSBTAP00000012704	22	19	1068.56	0.0145887	2.03722	2;3	2	PWM	unstim	A4FUD0_BOVIN|UniProtKB/TrEMBL|C-1-tetrahydrofolate synthase, cytoplasmic [Source:RefSeq peptide;Acc:NP_001076946]|10|ENSBTAG00000009641|ENSBTAT00000012704	499534	676464	557504	584810	660887	1.4845e+06	1.21004e+06	1.36749e+06
ENSBTAP00000032931	3	3	79.88	0.0145948	1.42372	2;3	2	unstim	PWM	Q2KJ55_BOVIN|UniProtKB/TrEMBL|rho GTPase-activating protein 25 [Source:RefSeq peptide;Acc:NP_001039857]|11|ENSBTAG00000023976|ENSBTAT00000033004	30106.9	31994.8	38964.2	35181.3	20604.7	21957.4	32500.4	20635.4
ENSBTAP00000020677	8	8	426.04	0.0148034	3.74635	3	1	unstim	PWM	PLBL1_BOVIN|UniProtKB/Swiss-Prot|Phospholipase B-like 1 [Source:UniProtKB/Swiss-Prot;Acc:Q9GL30]|5|ENSBTAG00000015562|ENSBTAT00000020677	1.01193e+06	1.24277e+06	1.14894e+06	784941	540255	187552	204918	185315
ENSBTAP00000040732	5	4	120.1	0.0148299	1.86642	2;3	2	PWM	unstim	RL13A_BOVIN|UniProtKB/Swiss-Prot|60S ribosomal protein L13a [Source:UniProtKB/Swiss-Prot;Acc:Q3SZ90]|18|ENSBTAG00000005296|ENSBTAT00000005007	330630	358829	373307	362216	437066	800271	787169	635111
ENSBTAP00000024618	1	1	36.04	0.0148335	1.52379	2	1	PWM	unstim	TIMM17B|EntrezGene|mitochondrial import inner membrane translocase subunit Tim17-B [Source:RefSeq peptide;Acc:NP_001039953]|X|ENSBTAG00000018496|ENSBTAT00000024618	19855	22400.7	22382.2	27043.8	33975.4	39922.3	32329.7	33476
ENSBTAP00000017428	11	10	470.65	0.0149132	3.71493	2;3	2	PWM	unstim	F1MSF1_BOVIN|UniProtKB/TrEMBL|ribonucleoside-diphosphate reductase M1 chain [Source:RefSeq peptide;Acc:NP_001106767]|15|ENSBTAG00000013111|ENSBTAT00000017428	66938.6	102392	83107.5	103683	109509	401571	366106	445777
ENSBTAP00000051719	1	1	24.41	0.0149179	2.59597	1	1	PWM	unstim	A6QQ73_BOVIN|UniProtKB/TrEMBL|hypothetical protein LOC618591 [Source:RefSeq peptide;Acc:NP_001094746]|5|ENSBTAG00000039980|ENSBTAT00000052038	3962.03	16599.3	2829.91	5955.11	10624.5	28280.9	11848.8	25428
ENSBTAP00000013985	11	11	584.76	0.0149391	1.68391	1;2;3	3	PWM	unstim	Q2HJ26_BOVIN|UniProtKB/TrEMBL|multifunctional protein ADE2 [Source:RefSeq peptide;Acc:NP_991382]|6|ENSBTAG00000010577|ENSBTAT00000013985	998085	1.43992e+06	1.02558e+06	1.08758e+06	1.24212e+06	2.40874e+06	1.95702e+06	2.05587e+06
ENSBTAP00000024227	9	9	377.05	0.0152662	1.1837	2	1	unstim	PWM	A0JN77_BOVIN|UniProtKB/TrEMBL|bifunctional ATP-dependent dihydroxyacetone kinase/FAD-AMP lyase (cyclizing) [Source:RefSeq peptide;Acc:NP_001019695]|29|ENSBTAG00000018201|ENSBTAT00000024227	255184	272245	181021	280713	208020	216685	149893	261052
ENSBTAP00000017614;ENSBTAP00000030057	20	19	1218.23	0.0152792	3.95665	1;2;3	3	PWM	unstim	Q08DL0_BOVIN|UniProtKB/TrEMBL|solute carrier family 3, member 2 [Source:RefSeq peptide;Acc:NP_001019659]|29|ENSBTAG00000013240|ENSBTAT00000017614	1.95742e+06	6.7213e+06	1.94162e+06	1.54709e+06	8.05773e+06	1.39046e+07	1.40151e+07	1.21648e+07
ENSBTAP00000009792;ENSBTAP00000052588	3	3	115.3	0.015361	1.68212	1	1	PWM	unstim	CD28|EntrezGene|T-cell-specific surface glycoprotein CD28 precursor [Source:RefSeq peptide;Acc:NP_851347]|2|ENSBTAG00000007445|ENSBTAT00000009792	118785	179917	175376	109006	156346	276458	317765	230251
ENSBTAP00000003662	17	16	983.79	0.0154468	1.77782	2;3	2	PWM	unstim	TCP1|EntrezGene|T-complex protein 1 subunit alpha [Source:RefSeq peptide;Acc:NP_001033175]|9|ENSBTAG00000002829|ENSBTAT00000003662	1.94902e+06	2.22798e+06	2.05799e+06	1.99761e+06	2.55926e+06	4.90902e+06	3.38326e+06	3.78454e+06
ENSBTAP00000003434	2	2	95.02	0.0154562	1.96888	2	1	unstim	PWM	||Uncharacterized protein [Source:UniProtKB/TrEMBL;Acc:F1N7H2]|5|ENSBTAG00000032899|ENSBTAT00000003434	49350	66382.8	65166.8	62405.6	36834.9	27577	32790.6	26372.8
ENSBTAP00000025580	5	5	201.93	0.0156165	1.5707	2	1	PWM	unstim	USP14|EntrezGene|ubiquitin carboxyl-terminal hydrolase 14 [Source:RefSeq peptide;Acc:NP_001068657]|24|ENSBTAG00000019214|ENSBTAT00000025580	88264.3	100721	98792.1	90305.9	108201	162657	153567	169429
ENSBTAP00000022180	5	4	199.86	0.0157604	2.0558	2;3	2	PWM	unstim	PPID_BOVIN|UniProtKB/Swiss-Prot|Peptidyl-prolyl cis-trans isomerase D [Source:UniProtKB/Swiss-Prot;Acc:P26882]|17|ENSBTAG00000016680|ENSBTAT00000022180	19949.4	28400.6	23878.7	29924.3	28300.5	54361.9	45699.8	81643.6
ENSBTAP00000015682	1	1	21.74	0.0158144	1.8677	2	1	PWM	unstim	Q2KI57_BOVIN|UniProtKB/TrEMBL|Uncharacterized protein [Source:UniProtKB/TrEMBL;Acc:F1MBJ7]|7|ENSBTAG00000011811|ENSBTAT00000015682	3386.27	4206.01	5586.71	3406.86	4608.33	10220.2	10216.3	5932.47
ENSBTAP00000019184	3	3	195.37	0.0158153	1.41269	2;3	2	PWM	unstim	|||16|ENSBTAG00000014423|ENSBTAT00000019184	526477	873677	363722	500267	704093	1.41358e+06	478721	602132
ENSBTAP00000020764	2	2	41.17	0.0158266	11.4304	1	1	PWM	unstim	A5PJH6_BOVIN|UniProtKB/TrEMBL|tumor necrosis factor receptor superfamily member 4 [Source:RefSeq peptide;Acc:NP_001092513]|16|ENSBTAG00000015635|ENSBTAT00000020764	1810.32	16812.2	874.008	2514.2	28846.8	88978.7	86542.5	47222.3
ENSBTAP00000001791	5	5	197.75	0.0159768	1.42359	2;3	2	PWM	unstim	RS12_BOVIN|UniProtKB/Swiss-Prot|40S ribosomal protein S12 [Source:UniProtKB/Swiss-Prot;Acc:Q76I81]|9|ENSBTAG00000001360|ENSBTAT00000001791	276509	338543	295741	307683	373634	575405	363065	422509
ENSBTAP00000039548	2	1	87.56	0.0159927	2.7004	2	1	PWM	unstim	PPME1_BOVIN|UniProtKB/Swiss-Prot|Protein phosphatase methylesterase 1 [Source:UniProtKB/Swiss-Prot;Acc:Q58DN4]|15|ENSBTAG00000027612|ENSBTAT00000039760	10658.9	15836.7	12791.1	16787.9	29777.1	53892.7	42884.3	24869.7
ENSBTAP00000026786	8	6	403.63	0.0159957	1.91232	1;2;3	3	PWM	unstim	TRAP1_BOVIN|UniProtKB/Swiss-Prot|Heat shock protein 75 kDa, mitochondrial [Source:UniProtKB/Swiss-Prot;Acc:Q2TBI4]|25|ENSBTAG00000020109|ENSBTAT00000026786	184353	173254	181443	162107	288819	455899	349562	246555
ENSBTAP00000029348	15	11	574.46	0.0160947	1.72794	2;3	2	unstim	PWM	FLNB|HGNC Symbol|filamin B, beta [Source:HGNC Symbol;Acc:3755]|22|ENSBTAG00000022004|ENSBTAT00000029348	157133	253325	265798	214318	125619	130436	133073	126270
ENSBTAP00000024825	9	7	316.36	0.016142	1.7009	3	1	unstim	PWM	HP1B3_BOVIN|UniProtKB/Swiss-Prot|Heterochromatin protein 1-binding protein 3 [Source:UniProtKB/Swiss-Prot;Acc:Q08DU9]|2|ENSBTAG00000018656|ENSBTAT00000024825	1.49927e+06	1.58534e+06	1.42083e+06	1.61952e+06	1.19181e+06	859169	784750	765288
ENSBTAP00000047788	2	2	46.18	0.0161978	2.1233	2	1	PWM	unstim	F1MV22_BOVIN|UniProtKB/TrEMBL|amidophosphoribosyltransferase [Source:RefSeq peptide;Acc:NP_001095845]|6|ENSBTAG00000010571|ENSBTAT00000052667	10550.5	17025.5	19283.5	19141.3	17930.1	53301.5	35297.3	33610.7
ENSBTAP00000019573	2	2	119.88	0.0162183	3.21319	2;3	2	PWM	unstim	ISG15_BOVIN|UniProtKB/Swiss-Prot|Ubiquitin-like protein ISG15 [Source:UniProtKB/Swiss-Prot;Acc:O02741]|16|ENSBTAG00000014707|ENSBTAT00000019573	29685.4	75166.2	84142.1	69352.5	213414	225812	224967	165923
ENSBTAP00000004219	9	2	362.87	0.0162454	1.85031	1;3	2	unstim	PWM	A7YY52_BOVIN|UniProtKB/TrEMBL|T-cell surface glycoprotein CD4 [Source:RefSeq peptide;Acc:NP_001096695]|5|ENSBTAG00000003255|ENSBTAT00000004219	16741.3	18966.8	22287.6	22977.6	8432.78	14184.4	8942.61	12202.2
ENSBTAP00000042274	19	19	1063.91	0.0162613	1.73229	2;3	2	PWM	unstim	F1N0E5_BOVIN|UniProtKB/TrEMBL|T-complex protein 1 subunit delta [Source:RefSeq peptide;Acc:NP_001033283]|11|ENSBTAG00000004531|ENSBTAT00000044819	1.87144e+06	1.94549e+06	1.80045e+06	2.02282e+06	2.3576e+06	4.07337e+06	3.34488e+06	3.45923e+06
ENSBTAP00000027163	1	1	20.36	0.0162921	1.08281	1	1	unstim	PWM	DLG2|HGNC Symbol|discs, large homolog 2 (Drosophila) [Source:HGNC Symbol;Acc:2901]|29|ENSBTAG00000027868|ENSBTAT00000027163	1.20693e+06	997144	1.28727e+06	1.24729e+06	1.07092e+06	945920	1.22039e+06	1.13903e+06
ENSBTAP00000053517	2	2	62.46	0.0163741	1.38746	2	1	PWM	unstim	TMEM33|HGNC Symbol|transmembrane protein 33 [Source:HGNC Symbol;Acc:25541]|6|ENSBTAG00000043958|ENSBTAT00000061500	25047.4	28213.3	26494.6	27121.9	32991	34347.6	43977.4	36972.2
ENSBTAP00000006866;ENSBTAP00000054334	12	11	529.61	0.0163778	1.54945	2;3	2	PWM	unstim	RL4_BOVIN|UniProtKB/Swiss-Prot|60S ribosomal protein L4 [Source:UniProtKB/Swiss-Prot;Acc:Q58DW0]|10|ENSBTAG00000005211|ENSBTAT00000006866	2.88918e+06	2.61571e+06	2.32426e+06	2.7762e+06	3.50253e+06	4.25066e+06	4.32353e+06	4.35575e+06
ENSBTAP00000040249	4	3	171.52	0.0164027	1.61481	2;3	2	PWM	unstim	NPLOC4|HGNC Symbol|nuclear protein localization 4 homolog (S. cerevisiae) [Source:HGNC Symbol;Acc:18261]|19|ENSBTAG00000019105|ENSBTAT00000042613	40957.1	28181.2	58952.1	50335.6	57940.1	62841.4	88272.1	79070.5
ENSBTAP00000051979;ENSBTAP00000055302	4	3	222.14	0.0164458	1.43359	2;3	2	PWM	unstim	RPS26|EntrezGene|40S ribosomal protein S26 [Source:RefSeq peptide;Acc:NP_001015561]|5|ENSBTAG00000038896|ENSBTAT00000054840	223954	249609	152227	262802	275759	368235	269112	360767
ENSBTAP00000007978	7	7	379.36	0.0165797	2.16091	2;3	2	PWM	unstim	LRC59_BOVIN|UniProtKB/Swiss-Prot|Leucine-rich repeat-containing protein 59 [Source:UniProtKB/Swiss-Prot;Acc:Q5E9X4]|19|ENSBTAG00000006072|ENSBTAT00000007978	136189	196630	276590	183856	472123	397373	436128	408548
ENSBTAP00000037803	5	3	263.01	0.0166449	1.34543	3	1	PWM	unstim	A7MB38_BOVIN|UniProtKB/TrEMBL|splicing factor, arginine/serine-rich 4 [Source:RefSeq peptide;Acc:NP_001094701]|2|ENSBTAG00000013309|ENSBTAT00000037984	72322	78801.7	80760	105379	103498	120912	108832	120520
ENSBTAP00000025586	14	14	629.11	0.0167232	1.23187	2;3	2	PWM	unstim	EFTU_BOVIN|UniProtKB/Swiss-Prot|Elongation factor Tu, mitochondrial [Source:UniProtKB/Swiss-Prot;Acc:P49410]|25|ENSBTAG00000019216|ENSBTAT00000025586	380968	549856	404480	517909	533622	625806	506731	616767
ENSBTAP00000009832	17	17	661.2	0.0168043	1.45879	2;3	2	PWM	unstim	EIF3B_BOVIN|UniProtKB/Swiss-Prot|Eukaryotic translation initiation factor 3 subunit B [Source:UniProtKB/Swiss-Prot;Acc:A7MB16]|25|ENSBTAG00000007474|ENSBTAT00000009832	669586	841040	712277	732942	854121	1.10932e+06	1.03628e+06	1.31224e+06
ENSBTAP00000021773	27	24	911.81	0.0169232	2.32319	1;2;3	3	PWM	unstim	LRPPRC|HGNC Symbol|leucine-rich PPR-motif containing [Source:HGNC Symbol;Acc:15714]|11|ENSBTAG00000016368|ENSBTAT00000021773	355643	400652	340482	306275	499298	972775	833159	954321
ENSBTAP00000018917;ENSBTAP00000049380	19	18	1049.93	0.0171515	1.73244	2;3	2	PWM	unstim	TCPQ_BOVIN|UniProtKB/Swiss-Prot|T-complex protein 1 subunit theta [Source:UniProtKB/Swiss-Prot;Acc:Q3ZCI9]|1|ENSBTAG00000014233|ENSBTAT00000018917	1.43364e+06	1.66829e+06	1.51286e+06	1.48491e+06	1.781e+06	3.29638e+06	2.55505e+06	2.93494e+06
ENSBTAP00000013589	1	1	21.65	0.0172322	2.84753	3	1	unstim	PWM	NPAT|HGNC Symbol|nuclear protein, ataxia-telangiectasia locus [Source:HGNC Symbol;Acc:7896]|15|ENSBTAG00000010286|ENSBTAT00000013589	2.38809e+06	2.78795e+06	3.10448e+06	1.95969e+06	1.29596e+06	982639	572877	744694
ENSBTAP00000004114	8	7	331.71	0.0172551	1.46196	2;3	2	unstim	PWM	A4FUC2_BOVIN|UniProtKB/TrEMBL|heterogeneous nuclear ribonucleoprotein U-like protein 1 [Source:RefSeq peptide;Acc:NP_001076935]|18|ENSBTAG00000003168|ENSBTAT00000004114	479247	637059	538983	526137	400282	404181	383734	303923
ENSBTAP00000005789	3	3	141.89	0.0173397	2.2022	2;3	2	PWM	unstim	NUDC_BOVIN|UniProtKB/Swiss-Prot|Nuclear migration protein nudC [Source:UniProtKB/Swiss-Prot;Acc:Q17QG2]|2|ENSBTAG00000004416|ENSBTAT00000005789	75905.9	90918.1	55569	61146.2	101037	236737	138881	147755
ENSBTAP00000001863	1	1	29.48	0.0173476	2.65309	2	1	unstim	PWM	ABD12_BOVIN|UniProtKB/Swiss-Prot|Monoacylglycerol lipase ABHD12 [Source:UniProtKB/Swiss-Prot;Acc:Q08DW9]|13|ENSBTAG00000001420|ENSBTAT00000001863	18266	13969.9	13474.2	15237.9	8842.67	2527.79	5794.74	5807.25
ENSBTAP00000008348	6	6	266.03	0.0174138	1.29053	1;2	2	unstim	PWM	CD180|EntrezGene|CD180 antigen [Source:RefSeq peptide;Acc:NP_001069636]|20|ENSBTAG00000006360|ENSBTAT00000008348	146741	234977	73613.2	75291.4	128115	181901	48973.4	52175.6
ENSBTAP00000013355	2	2	147.27	0.0174607	2.02236	2;3	2	PWM	unstim	Q58DR1_BOVIN|UniProtKB/TrEMBL|histone acetyltransferase type B catalytic subunit [Source:RefSeq peptide;Acc:NP_001029519]|2|ENSBTAG00000010118|ENSBTAT00000013355	114028	107682	110546	131742	152164	249854	281303	255053
ENSBTAP00000031516	1	1	73.87	0.0174717	2.20547	3	1	PWM	unstim	MK67I_BOVIN|UniProtKB/Swiss-Prot|MKI67 FHA domain-interacting nucleolar phosphoprotein [Source:UniProtKB/Swiss-Prot;Acc:Q3SZM1]|2|ENSBTAG00000019387|ENSBTAT00000031564	17455	8319.04	17444.7	8175.28	26640.1	23421.7	35408.4	27877.6
ENSBTAP00000025834	1	1	26.28	0.0176222	5.31979	3	1	PWM	unstim	KIAA2013|EntrezGene|KIAA2013 protein precursor [Source:RefSeq peptide;Acc:NP_001039407]|16|ENSBTAG00000019388|ENSBTAT00000025834	1185.05	51.7637	1647.73	410.958	2498.09	358.345	9687.58	4987.34
ENSBTAP00000019872	5	5	173.98	0.0176224	1.10858	2;3	2	unstim	PWM	OXSR1|HGNC Symbol|oxidative-stress responsive 1 [Source:HGNC Symbol;Acc:8508]|22|ENSBTAG00000014927|ENSBTAT00000019872	207459	220463	249147	224700	199008	191251	223702	199487
ENSBTAP00000014194	23	22	1132.72	0.0176457	3.35501	2;3	2	PWM	unstim	MCM3|EntrezGene|DNA replication licensing factor MCM3 [Source:RefSeq peptide;Acc:NP_001013604]|23|ENSBTAG00000010721|ENSBTAT00000014194	377339	627964	318281	438384	609030	2.12271e+06	1.62526e+06	1.55442e+06
ENSBTAP00000017988	15	14	842.5	0.0177138	2.20821	1;2;3	3	unstim	PWM	Q3ZCI4_BOVIN|UniProtKB/TrEMBL|phosphogluconate dehydrogenase [Source:RefSeq peptide;Acc:NP_001137210]|16|ENSBTAG00000013527|ENSBTAT00000017988	4.10691e+06	5.55714e+06	5.2054e+06	5.66898e+06	3.02676e+06	2.32575e+06	1.87329e+06	2.07514e+06
ENSBTAP00000004922	2	2	46.61	0.0177313	1.81358	2	1	PWM	unstim	E1B941_BOVIN|UniProtKB/TrEMBL|mitochondrial-processing peptidase subunit beta precursor [Source:RefSeq peptide;Acc:NP_001029785]|4|ENSBTAG00000006876|ENSBTAT00000004922	13400.4	19340.3	16036.9	19750.4	16787.2	34606.7	34623.5	38263.5
ENSBTAP00000052820	11	11	591.44	0.0177358	4.74066	2;3	2	PWM	unstim	Q0P5I4_BOVIN|UniProtKB/TrEMBL|DNA replication licensing factor MCM4 [Source:RefSeq peptide;Acc:NP_001068626]|27|ENSBTAG00000017021|ENSBTAT00000056908	78628.2	77941.3	118083	87777.9	147117	534273	451427	585341
ENSBTAP00000022455	5	5	161.31	0.0179305	1.28581	2	1	unstim	PWM	VP26A_BOVIN|UniProtKB/Swiss-Prot|Vacuolar protein sorting-associated protein 26A [Source:UniProtKB/Swiss-Prot;Acc:Q0VD53]|28|ENSBTAG00000016882|ENSBTAT00000022455	193908	199682	171172	159015	171419	136621	128106	126749
ENSBTAP00000024427	2	2	164.54	0.0179966	1.63044	2;3	2	unstim	PWM	Q29RH9_BOVIN|UniProtKB/TrEMBL|transmembrane protein 109 [Source:RefSeq peptide;Acc:NP_001039935]|29|ENSBTAG00000018362|ENSBTAT00000024427	380269	1.02167e+06	364062	334666	316473	548095	230429	193409
ENSBTAP00000008358;ENSBTAP00000045321	17	17	711.91	0.0182917	1.68799	2;3	2	PWM	unstim	TCPG_BOVIN|UniProtKB/Swiss-Prot|T-complex protein 1 subunit gamma [Source:UniProtKB/Swiss-Prot;Acc:Q3T0K2]|3|ENSBTAG00000006370|ENSBTAT00000008358	1.2656e+06	1.09772e+06	1.0453e+06	1.13535e+06	1.54748e+06	2.24102e+06	1.85603e+06	2.02564e+06
ENSBTAP00000054845	2	2	46.04	0.0183937	1.90619	2	1	unstim	PWM	RENBP|EntrezGene|N-acylglucosamine 2-epimerase [Source:RefSeq peptide;Acc:NP_001039688]|X|ENSBTAG00000047827|ENSBTAT00000064844	16579.5	27735.9	19584.1	21509.5	12590.2	11012.6	9627.77	11575.5
ENSBTAP00000052927;ENSBTAP00000027204	3	2	132.44	0.018449	2.36445	2	1	unstim	PWM	A4IFU2_BOVIN|UniProtKB/TrEMBL|ras-related protein Rap-2b [Source:RefSeq peptide;Acc:NP_001096001]|1|ENSBTAG00000016961|ENSBTAT00000022561	74995	115475	106467	93350.3	54943.3	39557.8	37585	32979
ENSBTAP00000023731	1	1	31.32	0.0185564	1.93894	3	1	unstim	PWM	ARHGEF6|HGNC Symbol|Rac/Cdc42 guanine nucleotide exchange factor (GEF) 6 [Source:HGNC Symbol;Acc:685]|X|ENSBTAG00000017850|ENSBTAT00000023731	18845.4	7861.38	11824.2	14782	8280.21	6233.77	5541.81	7440.22
ENSBTAP00000044733	12	11	658.39	0.0187261	1.46917	1;2;3	3	unstim	PWM	CAN2_BOVIN|UniProtKB/Swiss-Prot|Calpain-2 catalytic subunit [Source:UniProtKB/Swiss-Prot;Acc:Q27971]|16|ENSBTAG00000012778|ENSBTAT00000047532	857559	466441	848210	577339	688276	281404	598589	303227
ENSBTAP00000012035	3	2	161.59	0.0187819	1.7816	3	1	PWM	unstim	MX1_BOVIN|UniProtKB/Swiss-Prot|Interferon-induced GTP-binding protein Mx1Interferon-induced GTP-binding protein Mx1, N-terminally processed [Source:UniProtKB/Swiss-Prot;Acc:P79135]|1|ENSBTAG00000030913|ENSBTAT00000012035	7552.9	6385.94	17254.6	15948.4	18921.1	9360.38	25726.7	29979.6
ENSBTAP00000002397	6	6	247.22	0.018934	1.79616	3	1	unstim	PWM	A4FV28_BOVIN|UniProtKB/TrEMBL|bifunctional polynucleotide phosphatase/kinase [Source:RefSeq peptide;Acc:NP_001076991]|18|ENSBTAG00000001834|ENSBTAT00000002397	157365	155925	106709	157577	88116.9	71887.8	85273.6	76282.8
ENSBTAP00000010684	1	1	29.03	0.0190144	1.39743	2	1	PWM	unstim	KCAB2_BOVIN|UniProtKB/Swiss-Prot|Voltage-gated potassium channel subunit beta-2 [Source:UniProtKB/Swiss-Prot;Acc:Q27955]|16|ENSBTAG00000008125|ENSBTAT00000010684	18097.7	29645.8	33846.9	14000.4	24371.3	43150.4	41357.6	24702
ENSBTAP00000007420	1	1	48.45	0.0190674	1.93869	1	1	PWM	unstim	GPR132|HGNC Symbol|G protein-coupled receptor 132 [Source:HGNC Symbol;Acc:17482]|21|ENSBTAG00000005647|ENSBTAT00000007420	2952.03	3799.26	4082.64	4143.58	8656.32	5846.82	7515.15	7018.43
ENSBTAP00000003999	17	17	972.93	0.0191244	1.08495	2;3	2	PWM	unstim	ACADV_BOVIN|UniProtKB/Swiss-Prot|Very long-chain specific acyl-CoA dehydrogenase, mitochondrial [Source:UniProtKB/Swiss-Prot;Acc:P48818]|19|ENSBTAG00000003072|ENSBTAT00000003999	1.07647e+06	1.14302e+06	1.03694e+06	991344	1.17799e+06	1.29347e+06	1.09549e+06	1.04168e+06
ENSBTAP00000042044	1	1	32.2	0.0192321	1.47252	1	1	PWM	unstim	FXYD5|HGNC Symbol|FXYD domain containing ion transport regulator 5 [Source:HGNC Symbol;Acc:4029]|18|ENSBTAG00000031441|ENSBTAT00000044557	147595	286444	204309	143937	187115	369651	342707	252457
ENSBTAP00000032642	4	4	119.98	0.0193194	1.71024	2	1	unstim	PWM	PTPA_BOVIN|UniProtKB/Swiss-Prot|Serine/threonine-protein phosphatase 2A activator [Source:UniProtKB/Swiss-Prot;Acc:Q2KJ44]|11|ENSBTAG00000001933|ENSBTAT00000032713	207930	130421	153555	157884	103719	107085	78339.4	90797.3
ENSBTAP00000002174	8	5	338.08	0.0193487	1.32873	2;3	2	PWM	unstim	EHD1|EntrezGene|EH domain-containing protein 1 [Source:RefSeq peptide;Acc:NP_001015578]|29|ENSBTAG00000007361|ENSBTAT00000002174	430171	258569	350575	297507	570774	387132	485018	333353
ENSBTAP00000007309	1	1	28.66	0.0194532	3.90228	2	1	PWM	unstim	MLLT4|HGNC Symbol|myeloid/lymphoid or mixed-lineage leukemia (trithorax homolog, Drosophila); translocated to, 4 [Source:HGNC Symbol;Acc:7137]|9|ENSBTAG00000005557|ENSBTAT00000007309	434.871	2084.7	765.711	3932.19	3943.14	5033.54	6984.28	12203.7
ENSBTAP00000008193	5	5	142.87	0.0194707	2.18609	3	1	unstim	PWM	MAN2B1|EntrezGene|lysosomal alpha-mannosidase [Source:RefSeq peptide;Acc:NP_776986]|7|ENSBTAG00000006241|ENSBTAT00000008193	219747	272906	219369	137511	147320	105187	65285	70816.7
ENSBTAP00000053597	1	1	20.85	0.019474	1.29041	1	1	unstim	PWM	F1MP21_BOVIN|UniProtKB/TrEMBL|Uncharacterized protein [Source:UniProtKB/TrEMBL;Acc:F1MP21]|3|ENSBTAG00000024288|ENSBTAT00000060970	1.99941e+06	1.99212e+06	2.24256e+06	2.13924e+06	1.55198e+06	1.64704e+06	1.48039e+06	1.80948e+06
ENSBTAP00000056372	8	7	313.49	0.0195426	1.3486	2;3	2	PWM	unstim	PRS7_BOVIN|UniProtKB/Swiss-Prot|26S protease regulatory subunit 7 [Source:UniProtKB/Swiss-Prot;Acc:Q5E9F9]|4|ENSBTAG00000046712|ENSBTAT00000065774	275233	240071	235247	237541	308270	364776	331959	327534
ENSBTAP00000026535	4	4	158.4	0.0195622	1.4126	2;3	2	PWM	unstim	PSME3|HGNC Symbol|proteasome (prosome, macropain) activator subunit 3 (PA28 gamma; Ki) [Source:HGNC Symbol;Acc:9570]|19|ENSBTAG00000019918|ENSBTAT00000026535	101955	125855	100648	102668	117209	202281	149850	139669
ENSBTAP00000031032	2	2	48.16	0.0196072	1.9374	3	1	PWM	unstim	NAA50_BOVIN|UniProtKB/Swiss-Prot|N-alpha-acetyltransferase 50, NatE catalytic subunit [Source:UniProtKB/Swiss-Prot;Acc:Q0IIJ0]|1|ENSBTAG00000007784|ENSBTAT00000031069	6903.22	6519.63	3611	8946.01	9557.34	17605.7	7754.05	15416.2
ENSBTAP00000013707;ENSBTAP00000008670	12	12	539.87	0.0196301	1.43743	2;3	2	unstim	PWM	ARPC2_BOVIN|UniProtKB/Swiss-Prot|Actin-related protein 2/3 complex subunit 2 [Source:UniProtKB/Swiss-Prot;Acc:Q3MHR7]|2|ENSBTAG00000010386|ENSBTAT00000013707	3.79232e+06	4.68968e+06	3.56255e+06	3.88446e+06	3.16722e+06	3.05938e+06	2.62306e+06	2.2319e+06
ENSBTAP00000035133	12	11	558.55	0.0197357	1.53693	2;3	2	PWM	unstim	ERF1_BOVIN|UniProtKB/Swiss-Prot|Eukaryotic peptide chain release factor subunit 1 [Source:UniProtKB/Swiss-Prot;Acc:Q0VCX5]|7|ENSBTAG00000011415|ENSBTAT00000035255	493692	560495	465356	443620	618792	791189	746723	860539
ENSBTAP00000023778	14	14	851.75	0.0197792	1.75602	2;3	2	PWM	unstim	F1MWD3_BOVIN|UniProtKB/TrEMBL|Uncharacterized protein [Source:UniProtKB/TrEMBL;Acc:F1MWD3]|20|ENSBTAG00000017889|ENSBTAT00000023778	880892	847129	880538	908003	1.11657e+06	1.77965e+06	1.41096e+06	1.86796e+06
ENSBTAP00000048213	8	1	310.41	0.019791	7.33269	3	1	PWM	unstim	TMPO|EntrezGene|thymopoietin-2 [Source:RefSeq peptide;Acc:NP_001091474]|5|ENSBTAG00000004240|ENSBTAT00000052656	1247.94	5.0828	1120.31	3281.14	3630.26	107.346	20032.3	17692.5
ENSBTAP00000040330	10	9	402.73	0.0198972	1.1349	1;2;3	3	unstim	PWM	DDOST|HGNC Symbol|dolichyl-diphosphooligosaccharide--protein glycosyltransferase [Source:HGNC Symbol;Acc:2728]|2|ENSBTAG00000006085|ENSBTAT00000042698	1.13147e+06	1.1037e+06	1.09046e+06	1.07595e+06	1.00908e+06	1.04458e+06	908950	915770
ENSBTAP00000004161	3	2	71.15	0.01997	2.08566	2;3	2	PWM	unstim	RL35_BOVIN|UniProtKB/Swiss-Prot|60S ribosomal protein L35 [Source:UniProtKB/Swiss-Prot;Acc:Q3MHM7]|11|ENSBTAG00000003205|ENSBTAT00000004161	302852	271683	117108	345809	583340	526586	443431	610421
ENSBTAP00000024348	6	6	249.89	0.0199895	1.19798	2;3	2	PWM	unstim	SC23B_BOVIN|UniProtKB/Swiss-Prot|Protein transport protein Sec23B [Source:UniProtKB/Swiss-Prot;Acc:Q3SZN2]|13|ENSBTAG00000018295|ENSBTAT00000024348	79105.7	94077.9	119846	73893.5	88157.8	124380	142998	84031.6
ENSBTAP00000016242;ENSBTAP00000001948;ENSBTAP00000001950;ENSBTAP00000024663;ENSBTAP00000038183;ENSBTAP00000038184;ENSBTAP00000041398	18	5	1327.41	0.0200623	1.50202	1;2;3	3	PWM	unstim	TBA1B_BOVIN|UniProtKB/Swiss-Prot|Tubulin alpha-1B chain [Source:UniProtKB/Swiss-Prot;Acc:P81947]|5|ENSBTAG00000012244|ENSBTAT00000016242	9.49717e+06	9.61891e+06	9.50289e+06	9.38491e+06	1.10531e+07	1.63745e+07	1.58223e+07	1.38326e+07
ENSBTAP00000025668	1	1	25.78	0.0200797	1.79786	2;3	2	PWM	unstim	KCNH3|HGNC Symbol|potassium voltage-gated channel, subfamily H (eag-related), member 3 [Source:HGNC Symbol;Acc:6252]|5|ENSBTAG00000019277|ENSBTAT00000025668	323435	74361.6	271709	399692	544291	229067	452226	696686
ENSBTAP00000005327	6	3	318.65	0.0201783	1.35907	1;2;3	3	unstim	PWM	A7Z057_BOVIN|UniProtKB/TrEMBL|14-3-3 protein gamma [Source:RefSeq peptide;Acc:NP_777218]|25|ENSBTAG00000004077|ENSBTAT00000005327	506454	657707	428093	497064	441074	413356	309892	372987
ENSBTAP00000045648	2	2	54.02	0.0202656	3.83469	2;3	2	PWM	unstim	IFI44|HGNC Symbol|interferon-induced protein 44 [Source:HGNC Symbol;Acc:16938]|3|ENSBTAG00000034349|ENSBTAT00000048651	1601.44	6925.94	5107.32	4682.06	11272.1	11568.8	23387	24011.2
ENSBTAP00000028983	9	9	383.84	0.0202835	1.37615	2;3	2	PWM	unstim	Q3SZ81_BOVIN|UniProtKB/TrEMBL|PSMC3 protein [Source:UniProtKB/TrEMBL;Acc:Q3SZ81]|15|ENSBTAG00000021744|ENSBTAT00000028983	377765	334795	335190	354912	448933	538630	421105	521602
ENSBTAP00000015416	9	8	382.89	0.0203097	1.45966	2;3	2	unstim	PWM	RASL3_BOVIN|UniProtKB/Swiss-Prot|RAS protein activator like-3 [Source:UniProtKB/Swiss-Prot;Acc:A6QQ91]|7|ENSBTAG00000011602|ENSBTAT00000015416	269340	198207	229068	228387	166403	122676	200986	143644
ENSBTAP00000009564	20	19	882.96	0.0203936	1.70301	1	1	PWM	unstim	TF|EntrezGene|serotransferrin precursor [Source:RefSeq peptide;Acc:NP_803450]|1|ENSBTAG00000007273|ENSBTAT00000009564	1.21508e+06	2.33002e+06	984545	805797	2.11188e+06	3.15506e+06	1.75143e+06	2.06796e+06
ENSBTAP00000048950	6	5	270.71	0.0204557	2.17783	2;3	2	PWM	unstim	CLIC4_BOVIN|UniProtKB/Swiss-Prot|Chloride intracellular channel protein 4 [Source:UniProtKB/Swiss-Prot;Acc:Q9XSA7]|2|ENSBTAG00000009470|ENSBTAT00000054397	97487.7	142040	132844	161044	306901	313508	321069	220214
ENSBTAP00000031126	11	6	671.23	0.0204619	1.78585	1;2;3	3	PWM	unstim	Q2TBV8_BOVIN|UniProtKB/TrEMBL|MHC class I heavy chain isoform 1 [Source:RefSeq peptide;Acc:NP_001033607]|23|ENSBTAG00000002069|ENSBTAT00000031167	3.51635e+06	1.22849e+07	3.66219e+06	210478	7.80188e+06	1.74244e+07	9.57475e+06	333772
ENSBTAP00000041837	2	2	62.24	0.0204629	1.98073	3	1	PWM	unstim	Q5E952_BOVIN|UniProtKB/TrEMBL|RNA-binding protein Raly [Source:RefSeq peptide;Acc:NP_001014847]|13|ENSBTAG00000016524|ENSBTAT00000044331	18098.2	45856.4	33352.7	60432.2	58296.4	80853.5	81875.1	91414.2
ENSBTAP00000011779	9	9	287.96	0.0206053	3.96053	1	1	PWM	unstim	F1MVZ6_BOVIN|UniProtKB/TrEMBL|P2X purinoceptor [Source:UniProtKB/TrEMBL;Acc:F1MVZ6]|17|ENSBTAG00000008948|ENSBTAT00000011779	84427.3	323794	129294	73935.1	426928	581021	738787	674930
ENSBTAP00000017984	2	2	93.2	0.0206788	1.31287	1;3	2	unstim	PWM	Q0P5G6_BOVIN|UniProtKB/TrEMBL|chromosome 6 open reading frame 25 [Source:RefSeq peptide;Acc:NP_001071549]|23|ENSBTAG00000013525|ENSBTAT00000017984	186319	121394	142810	194926	133379	110633	109070	138549
ENSBTAP00000044536	4	4	104.15	0.0206806	1.65496	2;3	2	PWM	unstim	F1MK30_BOVIN|UniProtKB/TrEMBL|60S ribosomal protein L13 [Source:RefSeq peptide;Acc:NP_001015543]|18|ENSBTAG00000012044|ENSBTAT00000047320	281183	352214	281768	366166	469880	421956	499462	729251
ENSBTAP00000023908	2	2	98.13	0.0206862	1.43829	2;3	2	PWM	unstim	TEBP_BOVIN|UniProtKB/Swiss-Prot|Prostaglandin E synthase 3 [Source:UniProtKB/Swiss-Prot;Acc:Q3ZBF7]|5|ENSBTAG00000017967|ENSBTAT00000023908	117710	176124	170141	154287	162226	305354	202054	219608
ENSBTAP00000015756	6	6	249.94	0.0206901	2.10582	3	1	unstim	PWM	A6QLB5_BOVIN|UniProtKB/TrEMBL|echinoderm microtubule-associated protein-like 3 [Source:RefSeq peptide;Acc:NP_001095316]|29|ENSBTAG00000011872|ENSBTAT00000015756	216071	207513	153786	203386	93497.7	86725.2	118008	72530.1
ENSBTAP00000047104;ENSBTAP00000053899	20	17	948.34	0.0206957	1.75655	2;3	2	PWM	unstim	DDX3X|HGNC Symbol|DEAD (Asp-Glu-Ala-Asp) box polypeptide 3, X-linked [Source:HGNC Symbol;Acc:2745]|X|ENSBTAG00000035907|ENSBTAT00000050399	607907	784020	725553	668787	929913	1.04114e+06	1.37379e+06	1.54937e+06
ENSBTAP00000007982	4	4	218.47	0.0207268	1.43858	1;2;3	3	unstim	PWM	F1MZ38_BOVIN|UniProtKB/TrEMBL|succinyl-CoA ligase [Source:RefSeq peptide;Acc:NP_001030254]|11|ENSBTAG00000006075|ENSBTAT00000007982	295804	366742	228014	355833	235676	276369	158999	195362
ENSBTAP00000010348	6	6	375.03	0.0207754	1.69566	2	1	PWM	unstim	F1MM79_BOVIN|UniProtKB/TrEMBL|glutaminase kidney isoform, mitochondrial [Source:RefSeq peptide;Acc:NP_001071432]|2|ENSBTAG00000007863|ENSBTAT00000010348	139601	149804	140376	174973	175885	325790	223702	300082
ENSBTAP00000020452	5	5	369.2	0.0208339	1.57362	2;3	2	PWM	unstim	RL18_BOVIN|UniProtKB/Swiss-Prot|60S ribosomal protein L18 [Source:UniProtKB/Swiss-Prot;Acc:Q5E973]|18|ENSBTAG00000015388|ENSBTAT00000020452	3.07824e+06	3.37509e+06	2.45056e+06	3.0148e+06	3.99559e+06	5.30411e+06	5.10549e+06	4.35028e+06
ENSBTAP00000055424	3	3	50.55	0.0208696	3.84524	3	1	unstim	PWM	Q7M3H9_BOVIN|UniProtKB/TrEMBL|30K serine proteinase homolog [Source:UniProtKB/TrEMBL;Acc:Q7M3H9]|7|ENSBTAG00000045829|ENSBTAT00000065019	29503.2	24237.9	48645.9	21257.9	14483.8	6891.77	5330.42	5449.34
ENSBTAP00000005894	2	2	56.89	0.0209837	2.7095	2	1	PWM	unstim	UBA5_BOVIN|UniProtKB/Swiss-Prot|Ubiquitin-like modifier-activating enzyme 5 [Source:UniProtKB/Swiss-Prot;Acc:A7MAZ3]|1|ENSBTAG00000004495|ENSBTAT00000005894	4244.81	12393.7	9323.57	9149.34	20382.6	19195.7	25514.2	30041.8
ENSBTAP00000023783	15	12	533.62	0.0209899	2.35606	2;3	2	PWM	unstim	CAD|HGNC Symbol|carbamoyl-phosphate synthetase 2, aspartate transcarbamylase, and dihydroorotase [Source:HGNC Symbol;Acc:1424]|11|ENSBTAG00000017894|ENSBTAT00000023783	105877	86751.4	152303	96623.1	156142	235416	308158	340614
ENSBTAP00000028775	4	4	241.49	0.0210475	3.68933	1	1	PWM	unstim	ICOS_BOVIN|UniProtKB/Swiss-Prot|Inducible T-cell costimulator [Source:UniProtKB/Swiss-Prot;Acc:Q58DF9]|2|ENSBTAG00000021596|ENSBTAT00000028775	330608	2.2359e+06	483939	395697	1.55207e+06	4.03742e+06	3.78194e+06	3.34255e+06
ENSBTAP00000021637;ENSBTAP00000036717	4	4	155.38	0.0210643	2.76738	2;3	2	PWM	unstim	DNJA1_BOVIN|UniProtKB/Swiss-Prot|DnaJ homolog subfamily A member 1 [Source:UniProtKB/Swiss-Prot;Acc:Q5E954]|8|ENSBTAG00000016265|ENSBTAT00000021637	61706.4	22455.8	43478.1	59966.4	105624	124387	119925	169242
ENSBTAP00000053290	3	3	125.81	0.0211549	1.38745	2;3	2	PWM	unstim	SRPRB|HGNC Symbol|signal recognition particle receptor, B subunit [Source:HGNC Symbol;Acc:24085]|1|ENSBTAG00000044075|ENSBTAT00000061601	112961	168325	132247	147733	165218	209654	222525	181332
ENSBTAP00000008272	2	2	91.33	0.0213241	2.35116	2;3	2	unstim	PWM	Q2KIS5_BOVIN|UniProtKB/TrEMBL|estradiol 17-beta-dehydrogenase 11 [Source:RefSeq peptide;Acc:NP_001039751]|6|ENSBTAG00000006307|ENSBTAT00000008272	242468	328361	146158	227228	109939	112180	106597	72879.2
ENSBTAP00000039739;ENSBTAP00000018760	8	8	334.28	0.0213307	1.73664	1;2;3	3	PWM	unstim	IPO7|HGNC Symbol|importin 7 [Source:HGNC Symbol;Acc:9852]|15|ENSBTAG00000027722|ENSBTAT00000039955	192991	212457	186160	169322	234010	374724	352883	359844
ENSBTAP00000005840	2	2	87.42	0.0214511	1.5579	1	1	PWM	unstim	A5PKA7_BOVIN|UniProtKB/TrEMBL|calcium release-activated calcium channel protein 1 [Source:RefSeq peptide;Acc:NP_001092472]|17|ENSBTAG00000004457|ENSBTAT00000005840	22241.2	30618.4	27106.8	11266.9	31504.3	46209.6	39099.6	25319
ENSBTAP00000018491	6	6	268.79	0.0214529	1.41019	2;3	2	PWM	unstim	RS11_BOVIN|UniProtKB/Swiss-Prot|40S ribosomal protein S11 [Source:UniProtKB/Swiss-Prot;Acc:Q3T0V4]|18|ENSBTAG00000013924|ENSBTAT00000018491	739823	709108	615341	905442	865059	1.18605e+06	929262	1.20748e+06
ENSBTAP00000012938	1	1	26.47	0.0215961	3.92909	3	1	PWM	unstim	||Uncharacterized protein [Source:UniProtKB/TrEMBL;Acc:F1MRX4]|14|ENSBTAG00000009811|ENSBTAT00000012938	2747	3032.31	2251.94	2724.68	4813.41	15765.5	13876.2	7805.91
ENSBTAP00000020886	6	6	257.71	0.0216158	1.32124	2;3	2	PWM	unstim	F1MLV1_BOVIN|UniProtKB/TrEMBL|26S protease regulatory subunit 10B [Source:RefSeq peptide;Acc:NP_001039705]|10|ENSBTAG00000015732|ENSBTAT00000020886	225942	222099	250535	230518	314577	338645	286356	287981
ENSBTAP00000018248	5	5	185.32	0.021667	1.49943	2	1	PWM	unstim	UMPS|EntrezGene|uridine 5'-monophosphate synthase [Source:RefSeq peptide;Acc:NP_803474]|1|ENSBTAG00000013727|ENSBTAT00000018248	84114.1	100519	99340.7	93001.6	112564	190788	141917	119978
ENSBTAP00000039862	12	12	601.78	0.0217484	1.77925	1	1	PWM	unstim	Q3ZBX0_BOVIN|UniProtKB/TrEMBL|basigin [Source:RefSeq peptide;Acc:NP_001068839]|7|ENSBTAG00000016648|ENSBTAT00000040082	1.04318e+06	2.25784e+06	949295	818077	1.55327e+06	3.33404e+06	1.96017e+06	2.17045e+06
ENSBTAP00000017503	33	21	1837.58	0.0217877	1.45108	2;3	2	unstim	PWM	MOES_BOVIN|UniProtKB/Swiss-Prot|Moesin [Source:UniProtKB/Swiss-Prot;Acc:Q2HJ49]|X|ENSBTAG00000003418|ENSBTAT00000017503	9.45648e+06	9.39492e+06	8.26064e+06	1.0117e+07	7.65657e+06	5.87038e+06	6.40077e+06	5.72834e+06
ENSBTAP00000012508	4	4	235.46	0.0218631	2.0461	2	1	unstim	PWM	Q1RMM9_BOVIN|UniProtKB/TrEMBL|alpha-N-acetylgalactosaminidase precursor [Source:RefSeq peptide;Acc:NP_001039814]|5|ENSBTAG00000009506|ENSBTAT00000012508	323831	351476	275383	271969	251530	132333	100972	112721
ENSBTAP00000008381	1	1	46.38	0.0218957	2.7803	3	1	PWM	unstim	||Uncharacterized protein [Source:UniProtKB/TrEMBL;Acc:E1BEB1]|29|ENSBTAG00000006386|ENSBTAT00000008381	11867.4	10989.1	3807.04	8580.01	17549.4	46664.7	12111.6	21662.1
ENSBTAP00000004440	1	1	38.64	0.0219984	1.22291	2	1	unstim	PWM	BET1|EntrezGene|BET1 homolog [Source:RefSeq peptide;Acc:NP_001092627]|4|ENSBTAG00000003424|ENSBTAT00000004440	16254.7	23027.9	18602.6	21417	12337.6	17193.2	15875.3	19440.9
ENSBTAP00000017340	2	2	117.47	0.0221273	1.95883	2;3	2	unstim	PWM	EM55_BOVIN|UniProtKB/Swiss-Prot|55 kDa erythrocyte membrane protein [Source:UniProtKB/Swiss-Prot;Acc:Q17QN6]|X|ENSBTAG00000013046|ENSBTAT00000017340	26586.7	26675.1	21535.3	31090.1	15227	19200.6	8089.66	11539.2
ENSBTAP00000014853	3	3	147.64	0.022261	2.60279	2	1	unstim	PWM	FRIH_BOVIN|UniProtKB/Swiss-Prot|Ferritin heavy chain [Source:UniProtKB/Swiss-Prot;Acc:O46414]|29|ENSBTAG00000011184|ENSBTAT00000014853	295387	74504	170376	232244	158428	37280.8	33065.5	68027.2
ENSBTAP00000003073	11	11	367.31	0.0222862	1.39863	1;2	2	PWM	unstim	NUCB1_BOVIN|UniProtKB/Swiss-Prot|Nucleobindin-1 [Source:UniProtKB/Swiss-Prot;Acc:Q0P569]|18|ENSBTAG00000002378|ENSBTAT00000003073	399784	763499	332327	240907	618915	975929	409843	424052
ENSBTAP00000014702;ENSBTAP00000047900	4	4	157.57	0.0222881	2.22151	2	1	PWM	unstim	ADK|EntrezGene|adenosine kinase [Source:RefSeq peptide;Acc:NP_001069534]|28|ENSBTAG00000011072|ENSBTAT00000014702	30840.5	66392.1	61302	62868.7	78652.1	196496	134049	82653.2
ENSBTAP00000029553	8	7	246.06	0.0224289	1.4811	2;3	2	PWM	unstim	MYO1C_BOVIN|UniProtKB/Swiss-Prot|Myosin-Ic [Source:UniProtKB/Swiss-Prot;Acc:Q27966]|19|ENSBTAG00000001332|ENSBTAT00000029554	43817.2	38760.8	47981.1	37483.9	58146.1	48789.1	71623.4	70329.7
ENSBTAP00000015764	1	1	39.94	0.0224342	10.1292	3	1	PWM	unstim	A5D9H4_BOVIN|UniProtKB/TrEMBL|chromatin assembly factor 1 subunit B [Source:RefSeq peptide;Acc:NP_001091483]|1|ENSBTAG00000011880|ENSBTAT00000015764	98.6718	79.3846	1170.24	89.4568	1122.51	2166	4222.95	7051.82
ENSBTAP00000021045	6	6	165.86	0.0224447	1.29817	2;3	2	PWM	unstim	Q8MJX1_BOVIN|UniProtKB/TrEMBL|microtubule-associated protein 4 [Source:RefSeq peptide;Acc:NP_776530]|22|ENSBTAG00000015839|ENSBTAT00000021045	151461	185903	226285	223019	183746	272525	256502	308455
ENSBTAP00000016223	7	7	280.57	0.0225477	2.56465	1	1	PWM	unstim	SEMA4A|EntrezGene|semaphorin-4A precursor [Source:RefSeq peptide;Acc:NP_001068908]|3|ENSBTAG00000012228|ENSBTAT00000016223	215082	553907	235734	242875	448226	901116	1.03913e+06	811176
ENSBTAP00000019763	1	1	49.08	0.0227059	1.70342	2	1	PWM	unstim	MTX1|EntrezGene|metaxin-1 [Source:RefSeq peptide;Acc:NP_001035698]|3|ENSBTAG00000014840|ENSBTAT00000019763	3301.34	4755.9	5582.36	3904.08	5416.17	8929.46	6903.5	8635.18
ENSBTAP00000036036	2	2	136.66	0.0228596	1.38814	2;3	2	PWM	unstim	CDC37|HGNC Symbol|cell division cycle 37 homolog (S. cerevisiae) [Source:HGNC Symbol;Acc:1735]|7|ENSBTAG00000011699|ENSBTAT00000036173	144084	173904	127367	171667	172866	232705	219223	231717
ENSBTAP00000031396	2	1	75.36	0.0229743	5.17266	2;3	2	PWM	unstim	Q2NKU1_BOVIN|UniProtKB/TrEMBL|deoxyuridine 5'-triphosphate nucleotidohydrolase, mitochondrial [Source:RefSeq peptide;Acc:NP_001071341]|10|ENSBTAG00000011998|ENSBTAT00000031441	7023.11	5489.98	2346.16	7840.39	14297.9	28360.5	31628.7	43130.4
ENSBTAP00000021651;ENSBTAP00000052626	5	4	316.5	0.0229868	1.35412	2;3	2	PWM	unstim	RL30_BOVIN|UniProtKB/Swiss-Prot|60S ribosomal protein L30 [Source:UniProtKB/Swiss-Prot;Acc:Q3T0D5]|14|ENSBTAG00000016278|ENSBTAT00000021651	1.43661e+06	1.47909e+06	757632	1.23521e+06	1.79721e+06	2.29044e+06	1.13114e+06	1.42796e+06
ENSBTAP00000033158	1	1	55.18	0.0231249	1.12666	3	1	PWM	unstim	|||3|ENSBTAG00000024097|ENSBTAT00000033238	3287.76	4290.48	3001.89	6088.66	4037.97	4908.03	3314.49	6519.58
ENSBTAP00000006718	2	2	62.12	0.0232343	1.43257	1	1	PWM	unstim	Q17QL5_BOVIN|UniProtKB/TrEMBL|cell cycle control protein 50A [Source:RefSeq peptide;Acc:NP_001068691]|9|ENSBTAG00000005100|ENSBTAT00000006718	39701.9	62040.2	39609.5	28645.4	57095.9	71743.3	64711.8	49981.1
ENSBTAP00000015499	9	2	481.36	0.0233611	2.0741	2;3	2	PWM	unstim	H11_BOVIN|UniProtKB/Swiss-Prot|Histone H1.1 [Source:UniProtKB/Swiss-Prot;Acc:P02253]|23|ENSBTAG00000011677|ENSBTAT00000015499	752613	615631	522462	710142	1.7409e+06	1.75531e+06	942056	956156
ENSBTAP00000027449	7	7	416.45	0.0234136	1.81196	2	1	PWM	unstim	IDO1|EntrezGene|indoleamine 2,3-dioxygenase 1 [Source:RefSeq peptide;Acc:NP_001095336]|27|ENSBTAG00000020602|ENSBTAT00000027449	474511	1.00337e+06	531242	655788	1.30703e+06	1.44922e+06	1.05875e+06	1.01371e+06
ENSBTAP00000010206	3	3	104.16	0.0234599	4.74566	1	1	PWM	unstim	SATT_BOVIN|UniProtKB/Swiss-Prot|Neutral amino acid transporter A [Source:UniProtKB/Swiss-Prot;Acc:A2VDL4]|11|ENSBTAG00000007763|ENSBTAT00000010206	5761.64	74523.3	10250	9643.19	60007.6	139864	136884	138657
ENSBTAP00000009687	3	3	102.37	0.0234674	1.5777	2;3	2	PWM	unstim	AIMP2_BOVIN|UniProtKB/Swiss-Prot|Aminoacyl tRNA synthase complex-interacting multifunctional protein 2 [Source:UniProtKB/Swiss-Prot;Acc:Q0II26]|25|ENSBTAG00000007367|ENSBTAT00000009687	51540.6	42478.5	56810.4	31196.3	61679.5	75629.4	87748.8	62123.8
ENSBTAP00000011484	9	8	466.12	0.0235428	1.46535	2;3	2	PWM	unstim	LA_BOVIN|UniProtKB/Swiss-Prot|Lupus La protein homolog [Source:UniProtKB/Swiss-Prot;Acc:P10881]|2|ENSBTAG00000008716|ENSBTAT00000011484	494373	711829	670674	701998	703112	1.05598e+06	779986	1.23988e+06
ENSBTAP00000025345	2	2	55.85	0.0235518	1.74124	3	1	unstim	PWM	Q0VC98_BOVIN|UniProtKB/TrEMBL|GA-binding protein alpha chain [Source:RefSeq peptide;Acc:NP_001068905]|1|ENSBTAG00000019043|ENSBTAT00000025345	34436.7	55917.7	27966.5	28343.7	19960.7	28193.8	23082.7	12992.5
ENSBTAP00000048148	1	1	41.42	0.0235856	2.54191	3	1	unstim	PWM	A0JN55_BOVIN|UniProtKB/TrEMBL|6-phosphofructo-2-kinase/fructose-2,6-biphosphatase 3 [Source:RefSeq peptide;Acc:NP_001071305]|13|ENSBTAG00000008401|ENSBTAT00000057357	28387.1	31117.7	33803.5	22396.4	16017.8	11707.3	6855.26	10938.6
ENSBTAP00000008933	6	6	262.08	0.023651	5.84631	3	1	unstim	PWM	EHD4|HGNC Symbol|EH-domain containing 4 [Source:HGNC Symbol;Acc:3245]|10|ENSBTAG00000006792|ENSBTAT00000008933	134869	243706	198387	311161	75203.5	20761	26754.9	29192.3
ENSBTAP00000001019	2	2	59.25	0.0237375	1.67438	2;3	2	unstim	PWM	A5PKH8_BOVIN|UniProtKB/TrEMBL|glucose 1,6-bisphosphate synthase [Source:RefSeq peptide;Acc:NP_001092454]|15|ENSBTAG00000000770|ENSBTAT00000001019	70216.9	50580	57959.9	56510.8	31288.7	26673.4	38420.9	44127.1
ENSBTAP00000044296	4	3	239.06	0.0239157	1.47769	2;3	2	PWM	unstim	PURA2_BOVIN|UniProtKB/Swiss-Prot|Adenylosuccinate synthetase isozyme 2 [Source:UniProtKB/Swiss-Prot;Acc:A7MBG0]|16|ENSBTAG00000013885|ENSBTAT00000047061	60467.9	79730.2	71414.7	88714.2	77692.2	98102.7	127817	140178
ENSBTAP00000014714	2	2	85.41	0.0239434	2.50354	2;3	2	PWM	unstim	POLD1|HGNC Symbol|polymerase (DNA directed), delta 1, catalytic subunit 125kDa [Source:HGNC Symbol;Acc:9175]|18|ENSBTAG00000011083|ENSBTAT00000014714	6811.2	3319.67	12379.9	7675.55	11334.7	12185.5	22704.7	29347.7
ENSBTAP00000010425	3	3	201.19	0.0239701	3.80496	1	1	PWM	unstim	Q1RML5_BOVIN|UniProtKB/TrEMBL|signaling lymphocytic activation molecule [Source:RefSeq peptide;Acc:NP_776609]|3|ENSBTAG00000007927|ENSBTAT00000010425	73466.8	298913	47306.3	38545.4	385302	532966	508879	316406
ENSBTAP00000017392	5	4	217.55	0.0240386	3.52125	2	1	PWM	unstim	SERB_BOVIN|UniProtKB/Swiss-Prot|Phosphoserine phosphatase [Source:UniProtKB/Swiss-Prot;Acc:Q2KHU0]|25|ENSBTAG00000013081|ENSBTAT00000017392	27972.8	47897.5	32697.8	37530.9	39794	195352	151341	127963
ENSBTAP00000046018	1	1	37.44	0.024068	3.44101	3	1	PWM	unstim	INTS9|EntrezGene|integrator complex subunit 9 [Source:RefSeq peptide;Acc:NP_001039828]|8|ENSBTAG00000008845|ENSBTAT00000049079	2130.85	132.115	5587.07	704.741	6053.67	506.066	14711.8	8165.54
ENSBTAP00000021671	2	2	37.58	0.0241051	1.07538	2	1	PWM	unstim	MOB1B|HGNC Symbol|MOB kinase activator 1B [Source:HGNC Symbol;Acc:29801]|6|ENSBTAG00000016290|ENSBTAT00000021671	83145.4	117422	101632	86092.7	85206.4	129994	110103	92260.7
ENSBTAP00000020759	3	3	132.62	0.0242461	4.95729	1	1	PWM	unstim	TNFRSF18|HGNC Symbol|tumor necrosis factor receptor superfamily, member 18 [Source:HGNC Symbol;Acc:11914]|16|ENSBTAG00000015632|ENSBTAT00000020759	34393.8	236343	39499.7	26829.7	262577	453747	579463	375145
ENSBTAP00000040899	13	13	801.14	0.0245892	1.52985	2;3	2	PWM	unstim	IF2A_BOVIN|UniProtKB/Swiss-Prot|Eukaryotic translation initiation factor 2 subunit 1 [Source:UniProtKB/Swiss-Prot;Acc:P68102]|10|ENSBTAG00000016311|ENSBTAT00000043322	629223	831108	570727	629881	760634	1.17228e+06	1.10092e+06	1.03699e+06
ENSBTAP00000026269	3	3	109.85	0.0246157	1.36898	2;3	2	PWM	unstim	Q1LZF6_BOVIN|UniProtKB/TrEMBL|long-chain-fatty-acid--CoA ligase 5 [Source:RefSeq peptide;Acc:NP_001069118]|26|ENSBTAG00000006707|ENSBTAT00000026269	83212.1	108024	86646.7	90311.5	133249	130025	131725	109053
ENSBTAP00000024553	34	29	2122.49	0.0246199	1.56737	2;3	2	unstim	PWM	NUMA1|HGNC Symbol|nuclear mitotic apparatus protein 1 [Source:HGNC Symbol;Acc:8059]|15|ENSBTAG00000018449|ENSBTAT00000024553	1.90286e+06	1.84386e+06	1.64623e+06	1.55445e+06	1.07476e+06	1.17738e+06	1.39471e+06	785669
ENSBTAP00000012530	4	4	185.07	0.0247075	1.4204	2;3	2	PWM	unstim	IF4E_BOVIN|UniProtKB/Swiss-Prot|Eukaryotic translation initiation factor 4E [Source:UniProtKB/Swiss-Prot;Acc:Q9N0T5]|6|ENSBTAG00000009522|ENSBTAT00000012530	115590	187233	153910	129733	157396	322730	190751	162141
ENSBTAP00000036318	7	7	262.29	0.0248747	2.82316	2	1	PWM	unstim	A4IFB8_BOVIN|UniProtKB/TrEMBL|importin-4 [Source:RefSeq peptide;Acc:NP_001077130]|10|ENSBTAG00000002707|ENSBTAT00000036460	21030.3	33375.9	25980.7	18051.8	38332.9	63644.9	84768.5	91161.8
ENSBTAP00000009152;ENSBTAP00000024473;ENSBTAP00000054964	6	4	431.98	0.0250634	1.60718	2;3	2	PWM	unstim	RL12_BOVIN|UniProtKB/Swiss-Prot|60S ribosomal protein L12 [Source:UniProtKB/Swiss-Prot;Acc:P61284]|11|ENSBTAG00000006963|ENSBTAT00000009152	961648	902503	849696	950693	1.36379e+06	1.88044e+06	1.06886e+06	1.57647e+06
ENSBTAP00000027623	2	2	55.54	0.0251752	2.15009	2;3	2	unstim	PWM	Q24K14_BOVIN|UniProtKB/TrEMBL|dehydrogenase/reductase SDR family member 7 [Source:RefSeq peptide;Acc:NP_001039627]|10|ENSBTAG00000020729|ENSBTAT00000027623	78037.1	96291.9	107238	70010.4	59877.8	31158.6	47963.1	24518.2
ENSBTAP00000002349;ENSBTAP00000054590;ENSBTAP00000056243	4	3	142.97	0.0252011	1.84056	2;3	2	PWM	unstim	RL36_BOVIN|UniProtKB/Swiss-Prot|60S ribosomal protein L36 [Source:UniProtKB/Swiss-Prot;Acc:Q3T171]|7|ENSBTAG00000001794|ENSBTAT00000002349	423854	299985	244247	517007	699620	791214	555382	687192
ENSBTAP00000024225	5	1	314.56	0.025226	1.44108	2;3	2	unstim	PWM	A7Z085_BOVIN|UniProtKB/TrEMBL|WD repeat-containing protein 82 [Source:RefSeq peptide;Acc:NP_001098929]|22|ENSBTAG00000002960|ENSBTAT00000024225	156716	160267	131061	154036	125571	87608.9	102879	101738
ENSBTAP00000025996	13	13	549.6	0.0253996	1.7069	2;3	2	unstim	PWM	F1MMK2_BOVIN|UniProtKB/TrEMBL|Glucose-6-phosphate 1-dehydrogenase [Source:UniProtKB/TrEMBL;Acc:F1MMK2]|X|ENSBTAG00000019512|ENSBTAT00000025996	768135	778496	736198	756195	653473	380537	386326	360098
ENSBTAP00000004885	4	4	127.83	0.0254127	1.61305	2;3	2	unstim	PWM	SCMC1_BOVIN|UniProtKB/Swiss-Prot|Calcium-binding mitochondrial carrier protein SCaMC-1 [Source:UniProtKB/Swiss-Prot;Acc:A5PJZ1]|3|ENSBTAG00000003752|ENSBTAT00000004885	117993	111575	111303	86978.4	84710.3	50456.1	64184.8	65890.8
ENSBTAP00000005804	2	2	72.21	0.025479	2.13428	2;3	2	unstim	PWM	OSBPL8|HGNC Symbol|oxysterol binding protein-like 8 [Source:HGNC Symbol;Acc:16396]|5|ENSBTAG00000004427|ENSBTAT00000005804	29429.2	42900.7	23536.4	24252.3	20400	12334.6	12073.7	11472.3
ENSBTAP00000021872	2	2	48.22	0.0257123	1.5423	3	1	PWM	unstim	HSP7E_BOVIN|UniProtKB/Swiss-Prot|Heat shock 70 kDa protein 14 [Source:UniProtKB/Swiss-Prot;Acc:Q2YDD0]|13|ENSBTAG00000016451|ENSBTAT00000021872	17664.8	15350	21383.8	23361.2	23201.1	19253.7	41048.7	36425.8
ENSBTAP00000028908	1	1	25.31	0.0257567	1.87968	2;3	2	PWM	unstim	TBR1|HGNC Symbol|T-box, brain, 1 [Source:HGNC Symbol;Acc:11590]|2|ENSBTAG00000021692|ENSBTAT00000028908	38480.4	58923.6	47449.5	36555.5	48519.4	98092.2	110495	83883.8
ENSBTAP00000053578;ENSBTAP00000043010	19	16	746.74	0.0258702	1.97379	1;2;3	3	PWM	unstim	Q3B7N3_BOVIN|UniProtKB/TrEMBL|RAN binding protein 6 [Source:RefSeq peptide;Acc:NP_001032906]|12|ENSBTAG00000039374|ENSBTAT00000061564	854308	686104	588693	619610	1.03271e+06	1.69325e+06	1.28591e+06	1.41353e+06
ENSBTAP00000029103	2	1	78.17	0.0259576	1.53255	2	1	unstim	PWM	HMGCL_BOVIN|UniProtKB/Swiss-Prot|Hydroxymethylglutaryl-CoA lyase, mitochondrial [Source:UniProtKB/Swiss-Prot;Acc:Q29448]|2|ENSBTAG00000021832|ENSBTAT00000029103	18810.6	17064.8	16384.1	19227	14567.1	10814.2	12012.9	9251.28
ENSBTAP00000005398	3	2	56.26	0.0259945	1.96726	2	1	PWM	unstim	CPOX|HGNC Symbol|coproporphyrinogen oxidase [Source:HGNC Symbol;Acc:2321]|1|ENSBTAG00000004124|ENSBTAT00000005398	7443.68	13517.2	8707.81	10620.3	21043.9	26250.5	18380.6	13584
ENSBTAP00000019970	28	28	1467.73	0.0261151	1.24616	1;2;3	3	PWM	unstim	VCP|EntrezGene|transitional endoplasmic reticulum ATPase [Source:RefSeq peptide;Acc:NP_001029466]|8|ENSBTAG00000015000|ENSBTAT00000019970	3.41544e+06	3.07233e+06	2.30545e+06	3.53808e+06	4.02104e+06	4.45073e+06	2.67555e+06	4.21951e+06
ENSBTAP00000029577	1	1	20.92	0.0261603	2.39348	1	1	unstim	PWM	SELPLG|EntrezGene|P-selectin glycoprotein ligand 1 [Source:RefSeq peptide;Acc:NP_001032717]|17|ENSBTAG00000031851|ENSBTAT00000029578	57518.6	42514.8	68305	34594.1	16385.8	32552.3	22606.8	13240.8
ENSBTAP00000024878	2	1	41.55	0.0261812	2.26496	2	1	PWM	unstim	A6QPF1_BOVIN|UniProtKB/TrEMBL|RPAP3 protein [Source:UniProtKB/TrEMBL;Acc:A6QPF1]|5|ENSBTAG00000018690|ENSBTAT00000024878	1331.72	2016.61	977.03	2111.65	2447.38	3051.25	3687.6	5393.33
ENSBTAP00000038059;ENSBTAP00000022732	15	13	679.31	0.0262043	2.84569	2;3	2	PWM	unstim	GLYM_BOVIN|UniProtKB/Swiss-Prot|Serine hydroxymethyltransferase, mitochondrial [Source:UniProtKB/Swiss-Prot;Acc:Q3SZ20]|5|ENSBTAG00000031500|ENSBTAT00000038244	821007	640159	493247	682876	1.09475e+06	2.45434e+06	1.84022e+06	2.11561e+06
ENSBTAP00000007950;ENSBTAP00000047156	8	7	383.51	0.0262119	1.69606	2;3	2	PWM	unstim	F1MZK0_BOVIN|UniProtKB/TrEMBL|glycylpeptide N-tetradecanoyltransferase 1 [Source:RefSeq peptide;Acc:NP_803470]|19|ENSBTAG00000006051|ENSBTAT00000007950	179458	244624	183650	220519	285889	299674	411554	407650
ENSBTAP00000010324	3	2	146.2	0.0262798	3.68919	2;3	2	PWM	unstim	EED_BOVIN|UniProtKB/Swiss-Prot|Polycomb protein EED [Source:UniProtKB/Swiss-Prot;Acc:Q3SZ25]|29|ENSBTAG00000007847|ENSBTAT00000010324	4232.78	3432.92	3445.94	4582.32	6998.5	12477.2	24231.4	14190.8
ENSBTAP00000048481	1	1	51.12	0.0264619	2.1372	2	1	PWM	unstim	A6H7F4_BOVIN|UniProtKB/TrEMBL|queuine tRNA-ribosyltransferase subunit QTRTD1 [Source:RefSeq peptide;Acc:NP_001092378]|1|ENSBTAG00000004977|ENSBTAT00000054516	7214.16	7955.96	9255.93	9582.3	9527.45	18469.8	16720.1	27965.3
ENSBTAP00000043171	3	3	174.26	0.0266119	2.52388	3	1	PWM	unstim	Q29RS9_BOVIN|UniProtKB/TrEMBL|replication factor C subunit 4 [Source:RefSeq peptide;Acc:NP_001039359]|1|ENSBTAG00000014727|ENSBTAT00000045810	13371.9	6877.45	21032.5	13143.5	16855.1	19340.8	60372.8	40794.7
ENSBTAP00000016526	5	5	112.98	0.0266213	1.17738	2;3	2	unstim	PWM	AP2M1_BOVIN|UniProtKB/Swiss-Prot|AP-2 complex subunit mu [Source:UniProtKB/Swiss-Prot;Acc:Q3ZC13]|1|ENSBTAG00000020106|ENSBTAT00000016526	123150	102891	132503	119766	117290	81463.8	107507	99987.3
ENSBTAP00000053151	3	3	217.62	0.0266542	4.33071	2	1	unstim	PWM	COX2_BOVIN|UniProtKB/Swiss-Prot|Cytochrome c oxidase subunit 2 [Source:UniProtKB/Swiss-Prot;Acc:P68530]|MT|ENSBTAG00000043556|ENSBTAT00000060549	276888	322137	85675.7	224727	45273.7	26312.2	22097.2	116312
ENSBTAP00000055370;ENSBTAP00000017042	11	1	510.85	0.026807	1.45482	1;2;3	3	PWM	unstim	ADT3_BOVIN|UniProtKB/Swiss-Prot|ADP/ATP translocase 3 [Source:UniProtKB/Swiss-Prot;Acc:P32007]|GJ060129.1|ENSBTAG00000047418|ENSBTAT00000063682	53370.9	54479.6	31003	26372.6	65654.8	72479.6	59432.9	42807
ENSBTAP00000052487	1	1	47.23	0.0268147	2.66483	1	1	unstim	PWM	THBD|EntrezGene|thrombomodulin [Source:RefSeq peptide;Acc:NP_001159994]|13|ENSBTAG00000002758|ENSBTAT00000003575	22646.3	30863.5	35718.5	15201.5	9132.13	18558.8	6184.5	5312.75
ENSBTAP00000015297	13	13	784.62	0.02691	1.45671	3	1	unstim	PWM	|||3|ENSBTAG00000011511|ENSBTAT00000015297	2.43301e+06	2.81465e+06	2.00974e+06	2.28483e+06	1.68831e+06	1.76798e+06	1.77764e+06	1.31659e+06
ENSBTAP00000004813	15	15	810.77	0.0269364	1.85723	2;3	2	unstim	PWM	A6QLV1_BOVIN|UniProtKB/TrEMBL|SUN domain-containing protein 2 [Source:RefSeq peptide;Acc:NP_001095789]|5|ENSBTAG00000003693|ENSBTAT00000004813	859985	982939	989110	720834	429756	362843	799090	321301
ENSBTAP00000019318;ENSBTAP00000028899;ENSBTAP00000040983;ENSBTAP00000045490;ENSBTAP00000050667;ENSBTAP00000055412;ENSBTAP00000056062	15	9	969.3	0.0269598	1.60919	1;2;3	3	PWM	unstim	EF1A1_BOVIN|UniProtKB/Swiss-Prot|Elongation factor 1-alpha 1 [Source:UniProtKB/Swiss-Prot;Acc:P68103]|9|ENSBTAG00000014534|ENSBTAT00000019318	3.5093e+06	4.83941e+06	4.6974e+06	3.99688e+06	5.55954e+06	7.37734e+06	5.82647e+06	8.66203e+06
ENSBTAP00000038398	1	1	26.19	0.0270448	1.84324	2	1	PWM	unstim	XPOT|HGNC Symbol|exportin, tRNA (nuclear export receptor for tRNAs) [Source:HGNC Symbol;Acc:12826]|5|ENSBTAG00000026962|ENSBTAT00000038585	5816.86	8961.94	5716.94	6435.61	8864.12	13873	9102.85	17800.9
ENSBTAP00000009559	18	18	1160.08	0.0270526	3.45318	2;3	2	unstim	PWM	F13A_BOVIN|UniProtKB/Swiss-Prot|Coagulation factor XIII A chain [Source:UniProtKB/Swiss-Prot;Acc:P12260]|23|ENSBTAG00000007268|ENSBTAT00000009559	4.91835e+06	7.08789e+06	5.46465e+06	6.75757e+06	3.36818e+06	1.60104e+06	873906	1.17315e+06
ENSBTAP00000025697	2	2	65.03	0.0271474	1.92641	2	1	unstim	PWM	F1MB84_BOVIN|UniProtKB/TrEMBL|Uncharacterized protein [Source:UniProtKB/TrEMBL;Acc:F1MB84]|8|ENSBTAG00000019299|ENSBTAT00000025697	54447.9	14901.8	22818.9	59940.8	21299.4	10424.2	16223.5	31013
ENSBTAP00000040479	3	3	132.82	0.0272077	1.28744	2;3	2	PWM	unstim	Q3T076_BOVIN|UniProtKB/TrEMBL|ribosomal protein S14 [Source:RefSeq peptide;Acc:NP_001071298]|7|ENSBTAG00000008570|ENSBTAT00000042874	428861	544361	353993	602074	597932	786771	411189	687944
ENSBTAP00000043726	17	16	779.52	0.0272355	1.78445	1;2	2	PWM	unstim	TFRC|HGNC Symbol|transferrin receptor (p90, CD71) [Source:HGNC Symbol;Acc:11763]|1|ENSBTAG00000032719|ENSBTAT00000046421	1.00915e+06	2.12327e+06	612010	792991	1.97134e+06	2.62552e+06	1.62417e+06	1.87576e+06
ENSBTAP00000027067	5	5	301.56	0.0272821	5.20837	3	1	PWM	unstim	G3BP1_BOVIN|UniProtKB/Swiss-Prot|Ras GTPase-activating protein-binding protein 1 [Source:UniProtKB/Swiss-Prot;Acc:Q32LC7]|7|ENSBTAG00000020309|ENSBTAT00000027067	13464.5	29595.2	56700.3	34872.3	100230	240076	86748.6	274162
ENSBTAP00000016346;ENSBTAP00000052701	8	7	533.34	0.0273431	1.93264	2	1	PWM	unstim	PNPH_BOVIN|UniProtKB/Swiss-Prot|Purine nucleoside phosphorylase [Source:UniProtKB/Swiss-Prot;Acc:P55859]|10|ENSBTAG00000012317|ENSBTAT00000016346	503370	1.0124e+06	662802	1.03004e+06	1.09884e+06	1.98062e+06	1.83481e+06	1.28682e+06
ENSBTAP00000008809	10	9	354.5	0.0274045	1.38571	2;3	2	PWM	unstim	EIF3E_BOVIN|UniProtKB/Swiss-Prot|Eukaryotic translation initiation factor 3 subunit E [Source:UniProtKB/Swiss-Prot;Acc:Q3T102]|14|ENSBTAG00000006702|ENSBTAT00000008809	209336	215700	171586	227029	243893	359084	251651	286715
ENSBTAP00000017069	3	3	116.15	0.027515	3.93638	2	1	unstim	PWM	FAM129B|HGNC Symbol|family with sequence similarity 129, member B [Source:HGNC Symbol;Acc:25282]|11|ENSBTAG00000012847|ENSBTAT00000017069	75716.8	59849	69550.6	60863.6	44353.6	4516.43	11093.5	7606.1
ENSBTAP00000038304	2	2	74.27	0.0276327	1.79897	2	1	unstim	PWM	A2VDZ0_BOVIN|UniProtKB/TrEMBL|serine/threonine-protein phosphatase 2A 56 kDa regulatory subunit alpha isoform [Source:RefSeq peptide;Acc:NP_001075197]|16|ENSBTAG00000000754|ENSBTAT00000038491	19209.8	27512.6	45364.1	21010.7	12682.9	14686.5	19081.3	16417.1
ENSBTAP00000027182	3	2	154.29	0.0277029	2.20045	2;3	2	unstim	PWM	TP8L2_BOVIN|UniProtKB/Swiss-Prot|Tumor necrosis factor alpha-induced protein 8-like protein 2 [Source:UniProtKB/Swiss-Prot;Acc:Q3ZBK5]|3|ENSBTAG00000020394|ENSBTAT00000027182	100454	107499	144538	171497	71210.6	31084.3	76938.6	58895
ENSBTAP00000008444	12	10	356.87	0.0277042	1.65392	3	1	unstim	PWM	DOCK11|HGNC Symbol|dedicator of cytokinesis 11 [Source:HGNC Symbol;Acc:23483]|X|ENSBTAG00000006439|ENSBTAT00000008444	303867	255572	252204	245734	165036	127017	219931	127333
ENSBTAP00000013608	13	11	493.56	0.0277386	3.01618	1	1	PWM	unstim	ICAM1|EntrezGene|intercellular adhesion molecule 1 precursor [Source:RefSeq peptide;Acc:NP_776773]|7|ENSBTAG00000010303|ENSBTAT00000013608	529081	1.59817e+06	573230	484343	3.55354e+06	2.50359e+06	1.92623e+06	1.62265e+06
ENSBTAP00000055364	12	10	621.63	0.0278804	1.40435	2;3	2	unstim	PWM	URP2_BOVIN|UniProtKB/Swiss-Prot|Fermitin family homolog 3 [Source:UniProtKB/Swiss-Prot;Acc:Q32LP0]|29|ENSBTAG00000045862|ENSBTAT00000062951	2.31587e+06	2.56211e+06	2.16499e+06	2.18426e+06	1.87224e+06	1.49437e+06	1.79459e+06	1.40927e+06
ENSBTAP00000027850	3	3	201.14	0.0278853	1.39421	2;3	2	PWM	unstim	RL11_BOVIN|UniProtKB/Swiss-Prot|60S ribosomal protein L11 [Source:UniProtKB/Swiss-Prot;Acc:Q3T087]|2|ENSBTAG00000020905|ENSBTAT00000027850	924355	1.19044e+06	986831	963169	1.37291e+06	1.73797e+06	1.07259e+06	1.48368e+06
ENSBTAP00000028271;ENSBTAP00000010956	12	11	574.37	0.027912	1.31273	2;3	2	unstim	PWM	SEPT1_BOVIN|UniProtKB/Swiss-Prot|Septin-1 [Source:UniProtKB/Swiss-Prot;Acc:A5PJU9]|25|ENSBTAG00000021219|ENSBTAT00000028271	591795	477294	698126	571763	452000	405708	445151	478902
ENSBTAP00000041673	25	23	1291.85	0.0280172	1.34691	1;2;3	3	unstim	PWM	A0JN43_BOVIN|UniProtKB/TrEMBL|extended synaptotagmin-1 [Source:RefSeq peptide;Acc:NP_001071411]|5|ENSBTAG00000009543|ENSBTAT00000044160	2.91567e+06	2.90942e+06	2.91469e+06	2.73703e+06	2.20848e+06	1.72512e+06	2.28364e+06	2.30365e+06
ENSBTAP00000005059	1	1	42.59	0.0280605	2.33477	2	1	unstim	PWM	MCU|HGNC Symbol|mitochondrial calcium uniporter [Source:HGNC Symbol;Acc:23526]|28|ENSBTAG00000003876|ENSBTAT00000005059	7750.44	4033.43	5647.43	6519.7	1841.92	1328.52	2409.07	4678.87
ENSBTAP00000026826;ENSBTAP00000012088;ENSBTAP00000025959	10	9	313.36	0.0280689	1.403	2;3	2	PWM	unstim	RL7_BOVIN|UniProtKB/Swiss-Prot|60S ribosomal protein L7 [Source:UniProtKB/Swiss-Prot;Acc:Q58DT1]|14|ENSBTAG00000020139|ENSBTAT00000026826	1.70675e+06	1.87927e+06	1.24744e+06	1.78952e+06	2.05374e+06	2.73002e+06	2.21913e+06	2.28913e+06
ENSBTAP00000007967	7	7	450.88	0.0282224	2.4162	2;3	2	PWM	unstim	PCNA_BOVIN|UniProtKB/Swiss-Prot|Proliferating cell nuclear antigen [Source:UniProtKB/Swiss-Prot;Acc:Q3ZBW4]|13|ENSBTAG00000006065|ENSBTAT00000007967	534898	492315	488945	664119	663967	1.52338e+06	1.24227e+06	1.83836e+06
ENSBTAP00000027339	2	2	131.06	0.0282744	1.65712	2;3	2	PWM	unstim	PARK7_BOVIN|UniProtKB/Swiss-Prot|Protein DJ-1 [Source:UniProtKB/Swiss-Prot;Acc:Q5E946]|16|ENSBTAG00000020518|ENSBTAT00000027339	69844.6	72267.4	81770.7	133041	153520	140530	141045	156372
ENSBTAP00000018050	9	9	350.01	0.0282762	5.26678	1;2;3	3	PWM	unstim	SLC1A5|EntrezGene|neutral amino acid transporter B(0) [Source:RefSeq peptide;Acc:NP_777026]|18|ENSBTAG00000013577|ENSBTAT00000018050	88152.1	1.18167e+06	85563.4	102471	944409	2.34303e+06	2.4399e+06	1.95089e+06
ENSBTAP00000011671	2	2	51.52	0.0283074	1.71215	1	1	PWM	unstim	A4FV22_BOVIN|UniProtKB/TrEMBL|transmembrane protein 87A [Source:RefSeq peptide;Acc:NP_001076984]|10|ENSBTAG00000008863|ENSBTAT00000011671	9489.58	27440.7	5974.38	4500.44	21363.3	33151.9	14530.9	12118.4
ENSBTAP00000010103	1	1	46.48	0.0283289	8.00072	2	1	PWM	unstim	DHFR|EntrezGene|dihydrofolate reductase [Source:RefSeq peptide;Acc:NP_001071351]|7|ENSBTAG00000007681|ENSBTAT00000010103	1046.15	1859.17	158.203	3860.34	6633.35	25823.9	9522.63	13416.1
ENSBTAP00000053480	6	6	208.26	0.0283411	1.2886	1;3	2	PWM	unstim	SRRM1|HGNC Symbol|serine/arginine repetitive matrix 1 [Source:HGNC Symbol;Acc:16638]|2|ENSBTAG00000013772|ENSBTAT00000061408	236614	485156	176199	177993	267442	623979	272050	223016
ENSBTAP00000008153	1	1	31.37	0.0284271	1.57009	1	1	PWM	unstim	ADCY7|EntrezGene|adenylate cyclase type 7 [Source:RefSeq peptide;Acc:NP_776655]|18|ENSBTAG00000006208|ENSBTAT00000008153	2457.55	3045.02	5056.75	1778.99	4222.42	4163.26	6867.91	4118.62
ENSBTAP00000055553	7	2	455.05	0.0285092	1.77313	3	1	PWM	unstim	HIST1H1A|HGNC Symbol|histone cluster 1, H1a [Source:HGNC Symbol;Acc:4715]|23|ENSBTAG00000046621|ENSBTAT00000063485	477398	164903	391318	599252	1.21129e+06	287405	576936	819653
ENSBTAP00000011333	3	3	137.21	0.0285574	10.354	1	1	unstim	PWM	Q9MZT0_BOVIN|UniProtKB/TrEMBL|high affinity immunoglobulin gamma Fc receptor I [Source:RefSeq peptide;Acc:NP_776963]|3|ENSBTAG00000008592|ENSBTAT00000011333	59873.8	20144.5	33535.5	35960.8	3059.18	9631.22	825.578	924.25
ENSBTAP00000054606	3	3	198.58	0.0285715	1.82056	1;2	2	unstim	PWM	CD81_BOVIN|UniProtKB/Swiss-Prot|CD81 antigen [Source:UniProtKB/Swiss-Prot;Acc:Q3ZCD0]|29|ENSBTAG00000047495|ENSBTAT00000065583	171390	375924	127410	122070	122134	152597	76491.3	86441.1
ENSBTAP00000051857	8	2	387.94	0.0286604	1.29667	1;2;3	3	unstim	PWM	A4IFP6_BOVIN|UniProtKB/TrEMBL|GTPase, IMAP family member 1 [Source:RefSeq peptide;Acc:NP_001077146]|4|ENSBTAG00000040331|ENSBTAT00000052584	423101	662283	595250	482540	323262	463666	550448	330873
ENSBTAP00000026608	2	2	42.2	0.0286789	2.48512	1	1	unstim	PWM	IL7R|HGNC Symbol|interleukin 7 receptor [Source:HGNC Symbol;Acc:6024]|20|ENSBTAG00000019975|ENSBTAT00000026608	19111.3	12050.6	26522.5	13260.5	8555.82	8292.24	6213.14	5486.65
ENSBTAP00000021425	1	1	36.36	0.0286792	4.16708	2	1	unstim	PWM	PLP2_BOVIN|UniProtKB/Swiss-Prot|Proteolipid protein 2 [Source:UniProtKB/Swiss-Prot;Acc:Q6Y1E2]|X|ENSBTAG00000016093|ENSBTAT00000021425	67998.3	40100.8	48918.7	28521.5	7337.26	24003.8	6084.81	7099.11
ENSBTAP00000027046	8	8	416.94	0.0287254	1.47079	2;3	2	unstim	PWM	A5D980_BOVIN|UniProtKB/TrEMBL|tyrosine-protein phosphatase non-receptor type 6 [Source:RefSeq peptide;Acc:NP_001091486]|5|ENSBTAG00000020294|ENSBTAT00000027046	398962	543172	468633	554970	355159	306620	317626	357111
ENSBTAP00000022582	1	1	38.74	0.0289153	2.14706	3	1	PWM	unstim	A6QP53_BOVIN|UniProtKB/TrEMBL|Uncharacterized protein [Source:UniProtKB/TrEMBL;Acc:F1N6W2]|9|ENSBTAG00000016980|ENSBTAT00000022582	10148.6	4142.45	9640.09	15657.4	17304.7	17696.4	22963	27034.8
ENSBTAP00000020055	2	2	95.31	0.0289925	1.45222	2;3	2	unstim	PWM	LANCL1|EntrezGene|lanC-like protein 1 [Source:RefSeq peptide;Acc:NP_001069695]|2|ENSBTAG00000015066|ENSBTAT00000020055	171641	216076	233750	162567	148322	159431	139596	92538.1
ENSBTAP00000021256	16	15	1063.98	0.0290867	2.19054	1;2;3	3	unstim	PWM	F1N650_BOVIN|UniProtKB/TrEMBL|annexin A1 [Source:RefSeq peptide;Acc:NP_786978]|8|ENSBTAG00000015978|ENSBTAT00000021256	1.57287e+07	1.91565e+07	1.21696e+07	1.28487e+07	1.26919e+07	5.92046e+06	4.29141e+06	4.44262e+06
ENSBTAP00000045456;ENSBTAP00000045453	3	3	121.16	0.0290922	1.8522	2	1	unstim	PWM	||Uncharacterized protein [Source:UniProtKB/TrEMBL;Acc:E1B9E8]|20|ENSBTAG00000015512|ENSBTAT00000048411	89935.9	118989	97307.5	99088.8	73554.4	60448.1	36188.4	48641
ENSBTAP00000017861	2	1	45.46	0.0292158	2.52285	2;3	2	PWM	unstim	A6QL80_BOVIN|UniProtKB/TrEMBL|protein arginine N-methyltransferase 3 [Source:RefSeq peptide;Acc:NP_001095546]|29|ENSBTAG00000013421|ENSBTAT00000017861	7916.07	10415.3	5613.17	8471.17	10940.2	23726.7	23266.4	23846.5
ENSBTAP00000037200	2	2	153.16	0.0294302	1.80687	2;3	2	PWM	unstim	RL8_BOVIN|UniProtKB/Swiss-Prot|60S ribosomal protein L8 [Source:UniProtKB/Swiss-Prot;Acc:Q3T0S6]|14|ENSBTAG00000026327|ENSBTAT00000037367	289896	356455	175170	363738	448126	575412	527418	590655
ENSBTAP00000035753	2	2	99.67	0.029604	1.60701	2;3	2	PWM	unstim	A5PJR9_BOVIN|UniProtKB/TrEMBL|guanine nucleotide-binding protein-like 1 [Source:RefSeq peptide;Acc:NP_001096742]|23|ENSBTAG00000025516|ENSBTAT00000035886	29706.9	28492.8	37030.3	32285.5	35741.6	43503.4	57696.4	67977.5
ENSBTAP00000005534	6	6	284.83	0.0296364	1.88729	2;3	2	PWM	unstim	A6QQN4_BOVIN|UniProtKB/TrEMBL|pre-rRNA-processing protein TSR1 homolog [Source:RefSeq peptide;Acc:NP_001095403]|19|ENSBTAG00000004225|ENSBTAT00000005534	81805.5	117321	68904.2	117910	121996	167657	196991	241738
ENSBTAP00000021436	16	14	1066.65	0.0296766	1.5915	2;3	2	unstim	PWM	Q2HJ65_BOVIN|UniProtKB/TrEMBL|H2A histone family, member Y [Source:RefSeq peptide;Acc:NP_001039805]|7|ENSBTAG00000016105|ENSBTAT00000021436	1.12984e+07	1.22119e+07	8.78178e+06	8.49043e+06	9.26621e+06	6.81946e+06	5.75251e+06	3.787e+06
ENSBTAP00000027834	9	9	550.13	0.0296831	6.1549	1	1	PWM	unstim	A2VE30_BOVIN|UniProtKB/TrEMBL|interleukin-2 receptor subunit alpha precursor [Source:RefSeq peptide;Acc:NP_776783]|13|ENSBTAG00000020892|ENSBTAT00000027834	104619	1.52496e+06	103615	125746	1.51779e+06	3.04563e+06	4.10428e+06	2.77386e+06
ENSBTAP00000008366	15	15	606.52	0.0298996	1.46827	1;2;3	3	unstim	PWM	MYO1G|HGNC Symbol|myosin IG [Source:HGNC Symbol;Acc:13880]|4|ENSBTAG00000006377|ENSBTAT00000008366	1.01312e+06	765754	850222	665216	584250	504111	764979	390323
ENSBTAP00000014926	13	8	678.67	0.0299063	1.31719	1;2;3	3	unstim	PWM	Q2KJJ4_BOVIN|UniProtKB/TrEMBL|GTPase, IMAP family member 7 [Source:RefSeq peptide;Acc:NP_001073726]|4|ENSBTAG00000030940|ENSBTAT00000014926	1.31804e+06	1.40703e+06	1.96398e+06	1.3415e+06	1.1427e+06	1.105e+06	1.2455e+06	1.08513e+06
ENSBTAP00000021833	13	12	711.92	0.0300195	1.30211	2;3	2	unstim	PWM	LKHA4_BOVIN|UniProtKB/Swiss-Prot|Leukotriene A-4 hydrolase [Source:UniProtKB/Swiss-Prot;Acc:Q3SZH7]|5|ENSBTAG00000016415|ENSBTAT00000021833	677188	757068	820428	702790	557481	665441	527171	521196
ENSBTAP00000015465;ENSBTAP00000032214	2	2	70.33	0.0300928	1.86615	3	1	PWM	unstim	U2AF1_BOVIN|UniProtKB/Swiss-Prot|Splicing factor U2AF 35 kDa subunit [Source:UniProtKB/Swiss-Prot;Acc:A1A4K8]|1|ENSBTAG00000011645|ENSBTAT00000015465	50345.7	27586.7	163522	61429.3	127082	56857.3	201788	179500
ENSBTAP00000006260	6	6	220.98	0.0301812	2.09793	2;3	2	unstim	PWM	Q32PK0_BOVIN|UniProtKB/TrEMBL|tyrosine-protein kinase SYK [Source:RefSeq peptide;Acc:NP_001032542]|8|ENSBTAG00000004767|ENSBTAT00000006260	114270	255260	93296.5	156893	95809.9	102136	39985.1	57465.1
ENSBTAP00000008848	1	1	29.59	0.0301856	4.61417	1;2	2	PWM	unstim	Q9TU26_BOVIN|UniProtKB/TrEMBL|large neutral amino acids transporter small subunit 1 [Source:RefSeq peptide;Acc:NP_777038]|18|ENSBTAG00000006731|ENSBTAT00000008848	6847.64	97036.4	8637.19	8041.81	86478.3	164429	152612	152779
ENSBTAP00000025152;ENSBTAP00000051244	12	11	548.59	0.0302703	1.2314	2;3	2	PWM	unstim	PSD11_BOVIN|UniProtKB/Swiss-Prot|26S proteasome non-ATPase regulatory subunit 11 [Source:UniProtKB/Swiss-Prot;Acc:Q2KI42]|19|ENSBTAG00000018897|ENSBTAT00000025152	615093	578141	629754	585607	651781	776938	771394	765840
ENSBTAP00000017366;ENSBTAP00000043999	54	48	3257.29	0.0304272	1.24783	1;2;3	3	unstim	PWM	IQGAP1|HGNC Symbol|IQ motif containing GTPase activating protein 1 [Source:HGNC Symbol;Acc:6110]|21|ENSBTAG00000013060|ENSBTAT00000017366	1.27128e+07	1.03586e+07	1.21277e+07	9.93329e+06	1.03971e+07	7.62605e+06	1.11848e+07	6.96079e+06
ENSBTAP00000000731	9	9	414.78	0.0305689	3.1988	2;3	2	unstim	PWM	ACO1|EntrezGene|cytoplasmic aconitate hydratase [Source:RefSeq peptide;Acc:NP_001069059]|8|ENSBTAG00000000555|ENSBTAT00000000731	283962	369859	271920	367833	177597	46211.6	71686	108898
ENSBTAP00000011388	3	3	129.74	0.030791	3.98983	2;3	2	unstim	PWM	ST1A1_BOVIN|UniProtKB/Swiss-Prot|Sulfotransferase 1A1 [Source:UniProtKB/Swiss-Prot;Acc:P50227]|25|ENSBTAG00000008635|ENSBTAT00000011388	203282	322539	255383	308282	142745	47116.2	44007.6	39197
ENSBTAP00000017629	15	15	788.71	0.0308121	1.30213	1;2;3	3	PWM	unstim	XPO1|HGNC Symbol|exportin 1 (CRM1 homolog, yeast) [Source:HGNC Symbol;Acc:12825]|11|ENSBTAG00000013254|ENSBTAT00000017629	826355	854117	854372	676369	900722	1.06704e+06	1.24163e+06	972028
ENSBTAP00000027246	4	4	175.67	0.0308285	1.09458	2;3	2	PWM	unstim	THOP1|EntrezGene|thimet oligopeptidase [Source:RefSeq peptide;Acc:NP_001029163]|7|ENSBTAG00000020446|ENSBTAT00000027246	158730	215390	183508	194850	179919	226108	211761	205862
ENSBTAP00000017301	7	7	294.32	0.0308867	1.93913	2;3	2	PWM	unstim	GMPS|HGNC Symbol|guanine monphosphate synthetase [Source:HGNC Symbol;Acc:4378]|1|ENSBTAG00000013013|ENSBTAT00000017301	70894.6	101658	97210.9	81860.1	106785	147966	185233	241859
ENSBTAP00000034373	2	2	102.97	0.0309158	1.3768	1	1	PWM	unstim	SLAMF6|HGNC Symbol|SLAM family member 6 [Source:HGNC Symbol;Acc:21392]|3|ENSBTAG00000014368|ENSBTAT00000034482	88299.1	166959	95996.9	59841.9	102469	229407	128958	105166
ENSBTAP00000019138	2	1	57.77	0.0309723	2.277	2;3	2	PWM	unstim	ARP10_BOVIN|UniProtKB/Swiss-Prot|Actin-related protein 10 [Source:UniProtKB/Swiss-Prot;Acc:Q3ZBD2]|10|ENSBTAG00000014392|ENSBTAT00000019138	4355.83	102.072	3891.63	4616.22	6984.06	519.179	12800.9	9218.87
ENSBTAP00000028093;ENSBTAP00000052478	6	6	243.21	0.0310198	1.26745	2;3	2	PWM	unstim	RS16_BOVIN|UniProtKB/Swiss-Prot|40S ribosomal protein S16 [Source:UniProtKB/Swiss-Prot;Acc:Q3T0X6]|18|ENSBTAG00000021093|ENSBTAT00000028093	905266	1.09391e+06	879947	1.01845e+06	1.05449e+06	1.62603e+06	1.02926e+06	1.23019e+06
ENSBTAP00000007135	13	12	672.28	0.0310948	1.36363	2;3	2	PWM	unstim	A4FUZ3_BOVIN|UniProtKB/TrEMBL|26S protease regulatory subunit 4 [Source:RefSeq peptide;Acc:NP_001014855]|10|ENSBTAG00000005426|ENSBTAT00000007135	567738	445431	403604	535026	625671	647523	659829	728520
ENSBTAP00000048599	3	3	99.92	0.0311639	2.59993	3	1	PWM	unstim	UTP3|HGNC Symbol|UTP3, small subunit (SSU) processome component, homolog (S. cerevisiae) [Source:HGNC Symbol;Acc:24477]|6|ENSBTAG00000009310|ENSBTAT00000012263	9547.55	19140.1	12390.3	12621.8	16203.5	30727.6	49848.3	42836.4
ENSBTAP00000012002	8	8	274.41	0.0312436	1.31389	2;3	2	PWM	unstim	EIF2A|EntrezGene|eukaryotic translation initiation factor 2A [Source:RefSeq peptide;Acc:NP_001095753]|1|ENSBTAG00000009106|ENSBTAT00000012002	209922	296391	209713	297877	230649	365654	309631	426222
ENSBTAP00000053881;ENSBTAP00000020366;ENSBTAP00000023868;ENSBTAP00000024265	7	7	208.92	0.0313449	1.36093	1	1	PWM	unstim	A5PK04_BOVIN|UniProtKB/TrEMBL|solute carrier family 4, sodium bicarbonate cotransporter, member 7 [Source:RefSeq peptide;Acc:NP_001092396]|22|ENSBTAG00000018227|ENSBTAT00000065868	194426	250348	216731	174949	215354	321602	338305	263096
ENSBTAP00000009603	8	8	328.98	0.0315008	1.27409	2;3	2	PWM	unstim	Q3SWY7_BOVIN|UniProtKB/TrEMBL|splicing factor 3A subunit 3 [Source:RefSeq peptide;Acc:NP_001029720]|3|ENSBTAG00000007299|ENSBTAT00000009603	371934	469170	384662	413974	432639	550710	586215	519617
ENSBTAP00000021233	4	4	154.8	0.031536	1.80969	1	1	PWM	unstim	A6QPH6_BOVIN|UniProtKB/TrEMBL|junctional adhesion molecule-like [Source:RefSeq peptide;Acc:NP_001073719]|15|ENSBTAG00000023283|ENSBTAT00000021233	103483	106502	106354	60759.3	122844	218640	190794	150155
ENSBTAP00000007860	22	22	1231.17	0.0315603	2.54228	1;2;3	3	PWM	unstim	AMPL_BOVIN|UniProtKB/Swiss-Prot|Cytosol aminopeptidase [Source:UniProtKB/Swiss-Prot;Acc:P00727]|6|ENSBTAG00000005989|ENSBTAT00000007860	2.16156e+06	1.85381e+06	2.28211e+06	2.09312e+06	4.9978e+06	8.15991e+06	5.14797e+06	3.02558e+06
ENSBTAP00000032965	3	3	117.72	0.0315674	1.65135	2	1	unstim	PWM	VAMP8_BOVIN|UniProtKB/Swiss-Prot|Vesicle-associated membrane protein 8 [Source:UniProtKB/Swiss-Prot;Acc:Q3T0Y8]|11|ENSBTAG00000023997|ENSBTAT00000033040	40889.2	90722.2	44107.5	47987	36319.4	49189.7	21923.9	28035.4
ENSBTAP00000020009	7	6	326.65	0.031594	2.49047	1;2;3	3	unstim	PWM	A6QNL0_BOVIN|UniProtKB/TrEMBL|monocyte differentiation antigen CD14 precursor [Source:RefSeq peptide;Acc:NP_776433]|7|ENSBTAG00000015032|ENSBTAT00000020009	1.1844e+06	1.35097e+06	1.98189e+06	2.18756e+06	744053	807627	571412	569094
ENSBTAP00000018128	3	2	59.74	0.031674	1.57421	3	1	unstim	PWM	DGKZ|HGNC Symbol|diacylglycerol kinase, zeta [Source:HGNC Symbol;Acc:2857]|15|ENSBTAG00000013636|ENSBTAT00000018128	15420.3	11400.9	13715.7	21404.9	9104.8	8059.14	11565.8	10618.3
ENSBTAP00000021305	2	1	78.03	0.0317107	1.97304	2	1	unstim	PWM	PP2BA_BOVIN|UniProtKB/Swiss-Prot|Serine/threonine-protein phosphatase 2B catalytic subunit alpha isoform [Source:UniProtKB/Swiss-Prot;Acc:P48452]|6|ENSBTAG00000016005|ENSBTAT00000021305	41288.3	32951.1	55594.5	32091.4	19146.7	23636.4	18586.9	20698.7
ENSBTAP00000013451	11	11	554.19	0.0317518	1.37867	2;3	2	unstim	PWM	F1MJQ1_BOVIN|UniProtKB/TrEMBL|ras-related protein Rab-7a [Source:RefSeq peptide;Acc:NP_001030253]|22|ENSBTAG00000010193|ENSBTAT00000013451	2.75701e+06	3.66959e+06	3.03915e+06	2.82518e+06	2.56003e+06	2.54776e+06	1.95051e+06	1.85679e+06
ENSBTAP00000023384	10	9	539.78	0.0318445	1.31385	2;3	2	PWM	unstim	EIF3C_BOVIN|UniProtKB/Swiss-Prot|Eukaryotic translation initiation factor 3 subunit C [Source:UniProtKB/Swiss-Prot;Acc:Q3SYW6]|25|ENSBTAG00000006543|ENSBTAT00000023384	587514	645228	516615	641509	642832	946454	753100	798863
ENSBTAP00000000910	1	1	20.38	0.0318603	2.45124	3	1	unstim	PWM	RAPGEF6|HGNC Symbol|Rap guanine nucleotide exchange factor (GEF) 6 [Source:HGNC Symbol;Acc:20655]|7|ENSBTAG00000000682|ENSBTAT00000000910	5512.49	2051.64	3103.03	6360.53	1543.02	704.486	2524.49	2174.57
ENSBTAP00000044276	1	1	56.05	0.032188	1.82794	2	1	PWM	unstim	EFTUD1|HGNC Symbol|elongation factor Tu GTP binding domain containing 1 [Source:HGNC Symbol;Acc:25789]|21|ENSBTAG00000003410|ENSBTAT00000047037	3265.76	4759.28	4027.69	4889.57	4366.32	7581.69	10821.7	8199.79
ENSBTAP00000053566	1	1	20.21	0.0322396	1.06673	1	1	unstim	PWM	|||7|ENSBTAG00000003498|ENSBTAT00000061431	11510.7	11456.9	12169.8	12018	10655.4	10379.1	11357.8	11813.1
ENSBTAP00000004152	1	1	38.28	0.0322942	8.84609	2	1	unstim	PWM	F1N085_BOVIN|UniProtKB/TrEMBL|bifunctional 3'-phosphoadenosine 5'-phosphosulfate synthase 2 [Source:RefSeq peptide;Acc:NP_001069543]|26|ENSBTAG00000003196|ENSBTAT00000004152	4893.82	9131.99	6845.63	11562.5	2686.85	465.268	219.77	294.585
ENSBTAP00000015703	7	6	220.77	0.0324462	1.81574	2	1	PWM	unstim	Q2KJH7_BOVIN|UniProtKB/TrEMBL|delta-1-pyrroline-5-carboxylate synthase [Source:RefSeq peptide;Acc:NP_001039646]|26|ENSBTAG00000011832|ENSBTAT00000015703	35459.7	51419.6	35046.2	30691.8	41345.6	91429.5	71764.7	72573.1
ENSBTAP00000019346;ENSBTAP00000028091	6	5	220.88	0.032447	1.61102	2;3	2	unstim	PWM	VA0D1_BOVIN|UniProtKB/Swiss-Prot|V-type proton ATPase subunit d 1 [Source:UniProtKB/Swiss-Prot;Acc:P61420]|18|ENSBTAG00000014553|ENSBTAT00000019346	171178	235521	126692	180256	137313	104252	82104.8	119309
ENSBTAP00000003962	16	16	635.72	0.0325027	1.45012	1;2;3	3	PWM	unstim	RS3_BOVIN|UniProtKB/Swiss-Prot|40S ribosomal protein S3 [Source:UniProtKB/Swiss-Prot;Acc:Q3T169]|15|ENSBTAG00000005620|ENSBTAT00000003962	4.64919e+06	4.77785e+06	3.80681e+06	4.98781e+06	5.39186e+06	7.58647e+06	6.8662e+06	6.57909e+06
ENSBTAP00000042033	2	2	43.73	0.0326022	4.9799	1	1	PWM	unstim	Q2KHW2_BOVIN|UniProtKB/TrEMBL|CD83 antigen [Source:RefSeq peptide;Acc:NP_001040055]|23|ENSBTAG00000031430|ENSBTAT00000044544	654.156	28082.2	410.56	360.672	15041.5	64992.5	41264.9	25645.9
ENSBTAP00000011562	2	2	95.83	0.0326146	3.05606	3	1	PWM	unstim	SMC2|HGNC Symbol|structural maintenance of chromosomes 2 [Source:HGNC Symbol;Acc:14011]|8|ENSBTAG00000008772|ENSBTAT00000011562	24113.3	17398.4	21956.5	30856.3	33868.2	84271.8	93740.3	76381.5
ENSBTAP00000001464	4	4	135.79	0.0326809	2.64511	2;3	2	PWM	unstim	CYBP_BOVIN|UniProtKB/Swiss-Prot|Calcyclin-binding protein [Source:UniProtKB/Swiss-Prot;Acc:Q3T168]|16|ENSBTAG00000001107|ENSBTAT00000001464	20382.5	26408.3	26051.3	34763.9	43593.5	126103	42010	72923.3
ENSBTAP00000013737;ENSBTAP00000003343;ENSBTAP00000035330	89	76	5768.94	0.0328291	1.28673	1;2;3	3	unstim	PWM	MYH9|HGNC Symbol|myosin, heavy chain 9, non-muscle [Source:HGNC Symbol;Acc:7579]|5|ENSBTAG00000010402|ENSBTAT00000013737	2.6654e+07	2.59825e+07	2.63864e+07	1.6749e+07	2.0228e+07	1.72786e+07	2.45617e+07	1.2362e+07
ENSBTAP00000001147	2	2	42.9	0.0328444	4.15058	1	1	PWM	unstim	B0LSH3_BOVIN|UniProtKB/TrEMBL|Uncharacterized protein [Source:UniProtKB/TrEMBL;Acc:F1MTX9]|5|ENSBTAG00000000859|ENSBTAT00000001147	5002.82	58370.9	4754.66	5826.62	27492.1	108192	92805.8	78466.2
ENSBTAP00000009348;ENSBTAP00000042497	34	34	1580.5	0.0328475	1.39157	1;2	2	PWM	unstim	A6QNM4_BOVIN|UniProtKB/TrEMBL|integrin alpha-L [Source:RefSeq peptide;Acc:NP_937864]|25|ENSBTAG00000007103|ENSBTAT00000009348	7.24886e+06	1.00344e+07	8.09656e+06	3.88456e+06	1.05101e+07	1.23078e+07	1.04902e+07	7.41526e+06
ENSBTAP00000000146	4	3	91.34	0.032936	1.33159	1;2	2	PWM	unstim	Q2KIW2_BOVIN|UniProtKB/TrEMBL|macrosialin [Source:RefSeq peptide;Acc:NP_001039367]|19|ENSBTAG00000000133|ENSBTAT00000000146	332688	291787	161629	161227	478714	335676	192639	254424
ENSBTAP00000020719	4	4	276.22	0.0330416	3.09307	2;3	2	PWM	unstim	RS10_BOVIN|UniProtKB/Swiss-Prot|40S ribosomal protein S10 [Source:UniProtKB/Swiss-Prot;Acc:Q3T0F4]|23|ENSBTAG00000015598|ENSBTAT00000020719	69046.5	95819.5	221891	116530	436893	291896	315352	512564
ENSBTAP00000043977	2	1	100.86	0.0330619	1.57921	1;3	2	PWM	unstim	ABCB11|HGNC Symbol|ATP-binding cassette, sub-family B (MDR/TAP), member 11 [Source:HGNC Symbol;Acc:42]|2|ENSBTAG00000026885|ENSBTAT00000046707	10512.5	12435	15246.9	14447.9	11547.5	19537.1	27371.1	24677.8
ENSBTAP00000023406	4	4	107.14	0.0331653	1.55263	2;3	2	PWM	unstim	AK2|EntrezGene|adenylate kinase 2, mitochondrial [Source:RefSeq peptide;Acc:NP_776314]|2|ENSBTAG00000017605|ENSBTAT00000023406	38450.6	70052.4	46231.1	61066.3	83332	109400	58642	83684
ENSBTAP00000028048	11	11	495.86	0.0333315	1.34766	2;3	2	PWM	unstim	PRS8_BOVIN|UniProtKB/Swiss-Prot|26S protease regulatory subunit 8 [Source:UniProtKB/Swiss-Prot;Acc:P62194]|19|ENSBTAG00000021061|ENSBTAT00000028048	263459	280461	285358	299506	323079	471300	346547	380286
ENSBTAP00000004398	7	7	211.67	0.0333935	1.32162	3	1	PWM	unstim	SF3A1_BOVIN|UniProtKB/Swiss-Prot|Splicing factor 3A subunit 1 [Source:UniProtKB/Swiss-Prot;Acc:A2VDN6]|17|ENSBTAG00000003390|ENSBTAT00000004398	203395	281509	181642	279794	281254	411847	261007	296594
ENSBTAP00000042131	9	9	418.71	0.0334793	1.62638	2;3	2	PWM	unstim	PFAS|HGNC Symbol|phosphoribosylformylglycinamidine synthase [Source:HGNC Symbol;Acc:8863]|19|ENSBTAG00000031509|ENSBTAT00000044654	342786	297635	345185	268145	390759	575163	538419	534733
ENSBTAP00000008907	19	17	1412.73	0.0334921	1.66562	1;2;3	3	PWM	unstim	PHGDH|EntrezGene|D-3-phosphoglycerate dehydrogenase [Source:RefSeq peptide;Acc:NP_001030189]|3|ENSBTAG00000039719|ENSBTAT00000008907	6.1111e+06	6.29387e+06	3.47783e+06	3.15904e+06	6.84655e+06	1.13678e+07	7.25235e+06	6.24973e+06
ENSBTAP00000029060	1	1	37.62	0.0334946	1.98	2	1	unstim	PWM	CQ037_BOVIN|UniProtKB/Swiss-Prot|Protein C17orf37 homolog [Source:UniProtKB/Swiss-Prot;Acc:Q148C8]|19|ENSBTAG00000021802|ENSBTAT00000029060	30903	51948.1	39635.4	30102.6	8440.56	24461.7	24990.1	19173
ENSBTAP00000004890	6	6	251.89	0.0335477	1.36917	2;3	2	PWM	unstim	DNJA2_BOVIN|UniProtKB/Swiss-Prot|DnaJ homolog subfamily A member 2 [Source:UniProtKB/Swiss-Prot;Acc:Q2HJ94]|18|ENSBTAG00000003757|ENSBTAT00000004890	159078	172681	131291	130261	174231	267185	170880	200046
ENSBTAP00000025024;ENSBTAP00000030486;ENSBTAP00000050594;ENSBTAP00000051734;ENSBTAP00000055974	10	1	516.81	0.0336363	2.75671	2;3	2	PWM	unstim	RS4_BOVIN|UniProtKB/Swiss-Prot|40S ribosomal protein S4 [Source:UniProtKB/Swiss-Prot;Acc:P79103]|X|ENSBTAG00000018800|ENSBTAT00000025024	158518	117644	441984	148159	483869	246961	750158	907168
ENSBTAP00000019351;ENSBTAP00000022002;ENSBTAP00000056193	26	25	1334.66	0.0337221	2.58455	2;3	2	PWM	unstim	A4FV23_BOVIN|UniProtKB/TrEMBL|nucleolar RNA helicase 2 [Source:RefSeq peptide;Acc:NP_001076996]|28|ENSBTAG00000014558|ENSBTAT00000019351	1.45429e+06	1.96405e+06	1.05002e+06	1.59479e+06	2.11741e+06	4.501e+06	5.08908e+06	3.96302e+06
ENSBTAP00000031866	2	1	74.95	0.0337458	4.28843	3	1	PWM	unstim	A4IFC8_BOVIN|UniProtKB/TrEMBL|DNA ligase 1 [Source:RefSeq peptide;Acc:NP_001096018]|18|ENSBTAG00000014595|ENSBTAT00000031920	1863.53	5417.96	1357.4	3467.45	3906.25	14985.2	16759.1	16266.6
ENSBTAP00000009005	5	5	259.15	0.0338018	2.13408	1;2;3	3	unstim	PWM	Q5E9E0_BOVIN|UniProtKB/TrEMBL|galectin-9 isoform 1 [Source:RefSeq peptide;Acc:NP_001034266]|19|ENSBTAG00000006846|ENSBTAT00000009005	315042	410878	398355	336073	262847	176541	132639	112272
ENSBTAP00000036690	1	1	30.18	0.0338346	2.11241	3	1	PWM	unstim	UTP15_BOVIN|UniProtKB/Swiss-Prot|U3 small nucleolar RNA-associated protein 15 homolog [Source:UniProtKB/Swiss-Prot;Acc:A7MB12]|20|ENSBTAG00000006843|ENSBTAT00000036838	9924.33	6271.35	16045.5	4387.5	13066.3	16395.4	31852.8	16060.2
ENSBTAP00000000071	2	2	126.85	0.0338897	1.80519	2;3	2	PWM	unstim	FEN1_BOVIN|UniProtKB/Swiss-Prot|Flap endonuclease 1 [Source:UniProtKB/Swiss-Prot;Acc:Q58DH8]|29|ENSBTAG00000000064|ENSBTAT00000000071	103875	71706.2	91953.4	203738	148970	154231	260403	287132
ENSBTAP00000028950	3	2	88.72	0.0339338	1.60411	2	1	unstim	PWM	ADPRHL2|EntrezGene|poly(ADP-ribose) glycohydrolase ARH3 [Source:RefSeq peptide;Acc:NP_001030417]|3|ENSBTAG00000021715|ENSBTAT00000028950	21617	31618.8	33525.4	29663.5	18756.2	17611	16395.4	19816.4
ENSBTAP00000043550	20	16	976.69	0.0342762	1.51007	3	1	unstim	PWM	A7Z065_BOVIN|UniProtKB/TrEMBL|structural maintenance of chromosomes protein 3 [Source:RefSeq peptide;Acc:NP_776720]|26|ENSBTAG00000013905|ENSBTAT00000046231	1.26774e+06	1.47977e+06	977222	1.09596e+06	778831	914658	895165	603697
ENSBTAP00000027630	2	2	77.39	0.034492	1.51037	1	1	PWM	unstim	CD40|EntrezGene|tumor necrosis factor receptor superfamily member 5 precursor [Source:RefSeq peptide;Acc:NP_001099081]|13|ENSBTAG00000020736|ENSBTAT00000027630	31690.8	94126.8	25460.3	18705.5	68614.1	115650	35666.5	36807.3
ENSBTAP00000034314	3	3	103.4	0.0348994	1.56898	1	1	unstim	PWM	PTPRJ|HGNC Symbol|protein tyrosine phosphatase, receptor type, J [Source:HGNC Symbol;Acc:9673]|15|ENSBTAG00000024715|ENSBTAT00000034419	45394.1	51687.4	60785.9	37432.1	38715.9	36050.1	30384.8	19324.6
ENSBTAP00000019196	2	2	93.1	0.0350081	5.99563	2	1	unstim	PWM	HNMT_BOVIN|UniProtKB/Swiss-Prot|Histamine N-methyltransferase [Source:UniProtKB/Swiss-Prot;Acc:Q58DV7]|2|ENSBTAG00000014432|ENSBTAT00000019196	62612.3	171557	106257	139555	43117.3	12640.1	8679.16	15618.7
ENSBTAP00000025405	6	6	259.17	0.0351776	1.62342	2;3	2	PWM	unstim	SRP54_BOVIN|UniProtKB/Swiss-Prot|Signal recognition particle 54 kDa protein [Source:UniProtKB/Swiss-Prot;Acc:Q2T9U1]|21|ENSBTAG00000019085|ENSBTAT00000025405	67735.2	112027	72458.5	115420	132735	134501	160440	169157
ENSBTAP00000008650	16	15	1013.32	0.0352078	1.51174	1;2;3	3	PWM	unstim	KPNB1|HGNC Symbol|karyopherin (importin) beta 1 [Source:HGNC Symbol;Acc:6400]|19|ENSBTAG00000006586|ENSBTAT00000008650	1.52056e+06	1.71675e+06	1.60423e+06	1.3463e+06	1.68806e+06	2.63518e+06	2.49264e+06	2.53855e+06
ENSBTAP00000009392	2	2	60.29	0.0354775	3.42762	3	1	PWM	unstim	Q32PI3_BOVIN|UniProtKB/TrEMBL|replication factor C subunit 5 [Source:RefSeq peptide;Acc:NP_001068826]|17|ENSBTAG00000007137|ENSBTAT00000009392	6189.26	3204.92	10116	5534.81	7676.32	10405.2	44303.6	23459.4
ENSBTAP00000027912	1	1	21.58	0.0355735	1.66416	3	1	unstim	PWM	A4IFE5_BOVIN|UniProtKB/TrEMBL|leucine-rich repeat-containing protein 8D [Source:RefSeq peptide;Acc:NP_001077210]|3|ENSBTAG00000020958|ENSBTAT00000027912	4709.36	571.619	3738.82	7426.02	3044.04	326.568	3190.35	3321.4
ENSBTAP00000019060	1	1	38.89	0.035665	2.94691	1	1	PWM	unstim	Q27IK9_BOVIN|UniProtKB/TrEMBL|solute carrier family 7 (cationic amino acid transporter, y+ system), member 1 [Source:RefSeq peptide;Acc:NP_001129264]|12|ENSBTAG00000018577|ENSBTAT00000019060	6686.33	43970.3	3953.96	5672.01	23707.7	70852.5	42975	40112.4
ENSBTAP00000002408	3	3	114.59	0.0356796	1.60609	3	1	unstim	PWM	MOGS|HGNC Symbol|mannosyl-oligosaccharide glucosidase [Source:HGNC Symbol;Acc:24862]|11|ENSBTAG00000001844|ENSBTAT00000002408	110497	91837.1	55972.6	100192	89808.7	45979.9	40574.5	46849.4
ENSBTAP00000002549	1	1	42.13	0.0358003	1.2661	3	1	PWM	unstim	MRPS27|EntrezGene|28S ribosomal protein S27, mitochondrial [Source:RefSeq peptide;Acc:NP_001033197]|20|ENSBTAG00000001962|ENSBTAT00000002549	10218.2	10997.6	7579.03	12787	11387.7	13809.7	11646.2	15803
ENSBTAP00000041997;ENSBTAP00000028239	6	3	185.13	0.0358849	1.2456	2;3	2	unstim	PWM	A5D7E1_BOVIN|UniProtKB/TrEMBL|EH domain-containing protein 3 [Source:RefSeq peptide;Acc:NP_001091473]|11|ENSBTAG00000001662|ENSBTAT00000044505	136929	114813	129639	84063.8	108536	90660.3	94275.5	80200.4
ENSBTAP00000012655	18	17	1115.44	0.0359986	1.69901	2;3	2	unstim	PWM	ANXA2_BOVIN|UniProtKB/Swiss-Prot|Annexin A2 [Source:UniProtKB/Swiss-Prot;Acc:P04272]|10|ENSBTAG00000009615|ENSBTAT00000012655	2.13135e+07	2.61856e+07	1.51446e+07	1.35101e+07	1.73402e+07	1.04953e+07	9.8454e+06	7.14152e+06
ENSBTAP00000003664	9	8	616.99	0.0361281	1.38044	2;3	2	PWM	unstim	Q24JZ8_BOVIN|UniProtKB/TrEMBL|splicing factor U2AF 65 kDa subunit [Source:RefSeq peptide;Acc:NP_001068804]|18|ENSBTAG00000002830|ENSBTAT00000003664	622619	668733	1.1731e+06	760545	927244	911305	1.29723e+06	1.31612e+06
ENSBTAP00000016179	1	1	62.51	0.0361679	2.03781	3	1	PWM	unstim	IMP3|EntrezGene|U3 small nucleolar ribonucleoprotein protein IMP3 [Source:RefSeq peptide;Acc:NP_001073056]|21|ENSBTAG00000012199|ENSBTAT00000016179	5159.98	3536.7	6683.87	4017.53	6411.11	10800.8	12171.3	10146.4
ENSBTAP00000014563	1	1	40.27	0.0362218	1.439	1	1	PWM	unstim	TMED1_BOVIN|UniProtKB/Swiss-Prot|Transmembrane emp24 domain-containing protein 1 [Source:UniProtKB/Swiss-Prot;Acc:Q2TBK5]|7|ENSBTAG00000010968|ENSBTAT00000014563	10286.1	14330.7	5880.56	7122.41	12980	21561.4	11021.8	8571.64
ENSBTAP00000003599	5	5	205.87	0.0362513	1.18914	2;3	2	unstim	PWM	AP1G1|HGNC Symbol|adaptor-related protein complex 1, gamma 1 subunit [Source:HGNC Symbol;Acc:555]|18|ENSBTAG00000002769|ENSBTAT00000003599	108716	127265	115906	112224	95616.8	97256.2	108973	88446.3
ENSBTAP00000000453	8	7	446.21	0.0364119	1.41298	1;2;3	3	unstim	PWM	Q1RMI2_BOVIN|UniProtKB/TrEMBL|rho-related GTP-binding protein RhoG [Source:RefSeq peptide;Acc:NP_001073774]|15|ENSBTAG00000000347|ENSBTAT00000000453	1.54399e+06	1.81679e+06	1.66953e+06	1.50126e+06	1.44066e+06	1.18293e+06	1.10599e+06	892961
ENSBTAP00000019538	3	3	153.05	0.0365159	1.69345	2;3	2	unstim	PWM	Q9TRB9_BOVIN|UniProtKB/TrEMBL|beta-lactoglobulin precursor [Source:RefSeq peptide;Acc:NP_776354]|11|ENSBTAG00000014678|ENSBTAT00000019538	632028	825230	751482	463192	434212	616468	359403	167723
ENSBTAP00000022718	12	11	548.92	0.0367024	1.47862	2	1	unstim	PWM	NCPR_BOVIN|UniProtKB/Swiss-Prot|NADPH--cytochrome P450 reductase [Source:UniProtKB/Swiss-Prot;Acc:Q3SYT8]|25|ENSBTAG00000017082|ENSBTAT00000022718	370062	518665	368968	450320	330805	274549	241438	308347
ENSBTAP00000023642	11	11	699.92	0.0371059	1.82633	2;3	2	unstim	PWM	HCD2_BOVIN|UniProtKB/Swiss-Prot|3-hydroxyacyl-CoA dehydrogenase type-2 [Source:UniProtKB/Swiss-Prot;Acc:O02691]|X|ENSBTAG00000017779|ENSBTAT00000023642	2.56084e+06	1.56426e+06	1.05855e+06	1.20248e+06	1.001e+06	1.36496e+06	493310	637447
ENSBTAP00000021686	4	4	103.98	0.0374124	1.32535	1;2	2	PWM	unstim	TM9SF3|HGNC Symbol|transmembrane 9 superfamily member 3 [Source:HGNC Symbol;Acc:21529]|26|ENSBTAG00000016298|ENSBTAT00000021686	150453	161781	136239	110263	207703	242525	144157	146136
ENSBTAP00000056644;ENSBTAP00000022412	14	9	587.72	0.0376266	1.7147	2;3	2	PWM	unstim	PABP1_BOVIN|UniProtKB/Swiss-Prot|Polyadenylate-binding protein 1 [Source:UniProtKB/Swiss-Prot;Acc:P61286]|14|ENSBTAG00000046358|ENSBTAT00000064237	335421	402377	390465	366053	551955	941910	457063	611379
ENSBTAP00000008386	17	17	972.29	0.0377864	1.2407	1;2	2	unstim	PWM	F1MD19_BOVIN|UniProtKB/TrEMBL|glucose-6-phosphate isomerase [Source:RefSeq peptide;Acc:NP_001035561]|18|ENSBTAG00000006396|ENSBTAT00000008386	2.65512e+06	3.31988e+06	2.31195e+06	3.07347e+06	1.99704e+06	2.34091e+06	2.01955e+06	2.79893e+06
ENSBTAP00000018663	3	3	119.78	0.0378267	2.74851	3	1	PWM	unstim	Q2KJ17_BOVIN|UniProtKB/TrEMBL|ras GTPase-activating protein-binding protein 2 [Source:RefSeq peptide;Acc:NP_001039920]|6|ENSBTAG00000014041|ENSBTAT00000018663	6984.4	9120.06	18463.2	19471.9	24557.3	43508.2	22871.6	57591
ENSBTAP00000055736	1	1	47.98	0.0381051	2.08754	2	1	unstim	PWM	A1A4I8_BOVIN|UniProtKB/TrEMBL|exportin 7 [Source:RefSeq peptide;Acc:NP_001096012]|8|ENSBTAG00000047628|ENSBTAT00000065035	9578.97	3442.24	4339.56	9959.21	2579.4	1395.78	1077.92	8034.06
ENSBTAP00000015716	10	10	488.63	0.0386281	1.56149	2;3	2	PWM	unstim	Q1JPA2_BOVIN|UniProtKB/TrEMBL|elongation factor 1-gamma [Source:RefSeq peptide;Acc:NP_001035577]|29|ENSBTAG00000011843|ENSBTAT00000015716	2.78328e+06	3.15457e+06	2.09558e+06	2.80658e+06	3.3554e+06	5.00181e+06	4.58952e+06	3.97987e+06
ENSBTAP00000015408	3	2	194.95	0.038629	1.4385	2;3	2	PWM	unstim	A6H7B7_BOVIN|UniProtKB/TrEMBL|splicing factor, arginine/serine-rich 5 [Source:RefSeq peptide;Acc:NP_001092399]|10|ENSBTAG00000011596|ENSBTAT00000015408	28874.7	47796.7	40945.7	56542.5	50834.1	78621.6	59941	61131.8
ENSBTAP00000040442;ENSBTAP00000001383;ENSBTAP00000050842;ENSBTAP00000054062	10	10	306.17	0.0386714	1.19238	1	1	unstim	PWM	E1BC10_BOVIN|UniProtKB/TrEMBL|primary amine oxidase, lung isozyme [Source:RefSeq peptide;Acc:NP_851345]|19|ENSBTAG00000030333|ENSBTAT00000042831	327212	237730	102452	223258	263286	230574	79062	174034
ENSBTAP00000021580	1	1	29.38	0.0388253	1.27656	3	1	unstim	PWM	NMI|EntrezGene|N-myc-interactor [Source:RefSeq peptide;Acc:NP_001030270]|2|ENSBTAG00000032369|ENSBTAT00000021580	16980.7	25709.3	14434	12250.9	11051.9	23363.1	11767.9	8162.04
ENSBTAP00000019601	1	1	64.96	0.0388325	1.80456	2	1	PWM	unstim	TAPBPL|EntrezGene|tapasin-related protein [Source:RefSeq peptide;Acc:NP_001095591]|5|ENSBTAG00000014728|ENSBTAT00000019601	5041.69	20305.2	9563.27	8138.78	16620.2	25962	20584	14518.1
ENSBTAP00000033870	6	6	260.5	0.0388679	1.30813	1;2	2	PWM	unstim	Q2YDM4_BOVIN|UniProtKB/TrEMBL|torsin-1A-interacting protein 1 [Source:RefSeq peptide;Acc:NP_001073813]|16|ENSBTAG00000035226|ENSBTAT00000033967	102428	167960	106056	114867	149884	176704	159599	156511
ENSBTAP00000043307	1	1	30.36	0.0388979	1.54378	3	1	unstim	PWM	FHOD1|HGNC Symbol|formin homology 2 domain containing 1 [Source:HGNC Symbol;Acc:17905]|18|ENSBTAG00000032427|ENSBTAT00000045966	19740.2	11993.4	11652.2	16340.4	11841.7	9040.06	9771.74	8034.88
ENSBTAP00000009138	6	5	295.09	0.0389463	1.44565	2;3	2	unstim	PWM	Q08DB4_BOVIN|UniProtKB/TrEMBL|copine-1 [Source:RefSeq peptide;Acc:NP_001070408]|13|ENSBTAG00000006955|ENSBTAT00000009138	338002	381994	324775	340324	249933	198531	280460	229185
ENSBTAP00000018818;ENSBTAP00000029226	19	18	957.24	0.038974	1.52412	2;3	2	PWM	unstim	ILF3|HGNC Symbol|interleukin enhancer binding factor 3, 90kDa [Source:HGNC Symbol;Acc:6038]|7|ENSBTAG00000040076|ENSBTAT00000018818	956012	1.57713e+06	1.15347e+06	1.80493e+06	1.44411e+06	1.99324e+06	2.51278e+06	2.41964e+06
ENSBTAP00000044264	3	3	107.87	0.038976	1.61974	1	1	PWM	unstim	Q9BH12_BOVIN|UniProtKB/TrEMBL|Uncharacterized protein [Source:UniProtKB/TrEMBL;Acc:F1MU15]|29|ENSBTAG00000018367|ENSBTAT00000047026	150772	188443	262607	78783	192481	302515	404822	202583
ENSBTAP00000019505	6	6	186.51	0.0389849	1.25791	2	1	unstim	PWM	F1N1M7_BOVIN|UniProtKB/TrEMBL|carnitine O-palmitoyltransferase 2, mitochondrial precursor [Source:RefSeq peptide;Acc:NP_001039354]|3|ENSBTAG00000014649|ENSBTAT00000019505	106704	179447	121605	113664	101402	135970	85714.7	91426.1
ENSBTAP00000035821	4	4	139.77	0.0389966	4.17936	1	1	PWM	unstim	Q3ZC83_BOVIN|UniProtKB/TrEMBL|equilibrative nucleoside transporter 1 [Source:RefSeq peptide;Acc:NP_001029570]|23|ENSBTAG00000015131|ENSBTAT00000035955	24439.1	167352	27054.1	26005.8	86605.4	291176	388768	256773
ENSBTAP00000039003	1	1	30.03	0.0390407	4.07859	2	1	unstim	PWM	PPGB_BOVIN|UniProtKB/Swiss-Prot|Lysosomal protective proteinLysosomal protective protein 32 kDa chainLysosomal protective protein 20 kDa chain [Source:UniProtKB/Swiss-Prot;Acc:Q3MI05]|13|ENSBTAG00000027337|ENSBTAT00000039203	8466.98	12389.8	7698.48	14090.2	4318.16	722.605	1100.25	4314.92
ENSBTAP00000017654	2	1	137.79	0.0390823	1.8762	3	1	unstim	PWM	CENPV|HGNC Symbol|centromere protein V [Source:HGNC Symbol;Acc:29920]|19|ENSBTAG00000013274|ENSBTAT00000017654	45723.1	60826.3	50245.3	48797.6	39357.9	29553.8	17305.9	23361.6
ENSBTAP00000032188	3	3	114.91	0.0391778	1.40917	2	1	PWM	unstim	TOM40_BOVIN|UniProtKB/Swiss-Prot|Mitochondrial import receptor subunit TOM40 homolog [Source:UniProtKB/Swiss-Prot;Acc:Q1LZB5]|18|ENSBTAG00000001781|ENSBTAT00000032251	69166.9	80845.8	65431.1	74082.3	86398.6	144723	88811.5	88057.5
ENSBTAP00000049191	3	3	107.69	0.0392025	1.7113	1	1	PWM	unstim	||Dipeptidyl peptidase IV [Source:UniProtKB/TrEMBL;Acc:Q9BDD9]|2|ENSBTAG00000015330|ENSBTAT00000056886	29923.1	55279.1	42520.8	23848.6	44212.8	66361.4	96138.8	52671.7
ENSBTAP00000004094	2	2	100.93	0.039495	1.29644	3	1	unstim	PWM	DJB11_BOVIN|UniProtKB/Swiss-Prot|DnaJ homolog subfamily B member 11 [Source:UniProtKB/Swiss-Prot;Acc:Q3ZBA6]|1|ENSBTAG00000003151|ENSBTAT00000004094	100462	100566	52491.3	91143.6	82769.3	90231.7	34271.3	58581.6
ENSBTAP00000001668	8	8	438.2	0.0395292	1.56639	2;3	2	PWM	unstim	Q3SX47_BOVIN|UniProtKB/TrEMBL|heterogeneous nuclear ribonucleoprotein C [Source:RefSeq peptide;Acc:NP_001029567]|10|ENSBTAG00000011396|ENSBTAT00000001668	339386	743199	533296	490665	679865	850681	780092	989035
ENSBTAP00000024572;ENSBTAP00000003517;ENSBTAP00000023744	25	22	1450.75	0.0395844	1.90268	1;2;3	3	unstim	PWM	VIME_BOVIN|UniProtKB/Swiss-Prot|Vimentin [Source:UniProtKB/Swiss-Prot;Acc:P48616]|13|ENSBTAG00000018463|ENSBTAT00000024572	1.35254e+07	2.00038e+07	2.73704e+07	1.18072e+07	9.93984e+06	1.28266e+07	8.97192e+06	6.47446e+06
ENSBTAP00000002650	8	8	436.35	0.039761	1.39671	2;3	2	PWM	unstim	PSMD13|EntrezGene|26S proteasome non-ATPase regulatory subunit 13 [Source:RefSeq peptide;Acc:NP_001019703]|11|ENSBTAG00000002045|ENSBTAT00000002650	379147	364757	377507	338835	406998	510029	553895	568615
ENSBTAP00000031959	3	3	117.55	0.0398179	1.77373	2	1	PWM	unstim	Q0V8A9_BOVIN|UniProtKB/TrEMBL|mitochondrial import inner membrane translocase subunit TIM50 precursor [Source:RefSeq peptide;Acc:NP_001030196]|18|ENSBTAG00000010480|ENSBTAT00000032015	23378.1	24241.4	30065.7	39255.4	41260.8	67629.2	49208.1	49322.8
ENSBTAP00000042663	6	5	352.12	0.0398254	1.44634	2;3	2	unstim	PWM	A1L568_BOVIN|UniProtKB/TrEMBL|xaa-Pro dipeptidase [Source:RefSeq peptide;Acc:NP_001073787]|18|ENSBTAG00000031941|ENSBTAT00000045260	85400.2	103229	94505.7	194192	75971.6	62118.7	74511.8	117421
ENSBTAP00000025807	7	7	336.23	0.0398491	1.07829	2;3	2	PWM	unstim	RAB21|EntrezGene|ras-related protein Rab-21 [Source:RefSeq peptide;Acc:NP_001068785]|X|ENSBTAG00000019370|ENSBTAT00000025807	392593	448123	329093	386385	415913	459271	368689	434148
ENSBTAP00000007090	2	2	91.12	0.0399962	1.63667	2;3	2	unstim	PWM	GMFG_BOVIN|UniProtKB/Swiss-Prot|Glia maturation factor gamma [Source:UniProtKB/Swiss-Prot;Acc:Q56JZ9]|18|ENSBTAG00000005390|ENSBTAT00000007090	283079	398389	331945	288359	221774	295977	147328	130298
ENSBTAP00000018110	15	12	682.79	0.0400668	1.54475	3	1	unstim	PWM	F1MJI7_BOVIN|UniProtKB/TrEMBL|Uncharacterized protein [Source:UniProtKB/TrEMBL;Acc:F1MJI7]|7|ENSBTAG00000013624|ENSBTAT00000018110	862652	1.01269e+06	850501	908758	678982	680673	363754	629468
ENSBTAP00000007681	2	2	169.21	0.0400862	1.5822	1;2	2	unstim	PWM	A6QR35_BOVIN|UniProtKB/TrEMBL|secretory carrier-associated membrane protein 2 [Source:RefSeq peptide;Acc:NP_001095640]|21|ENSBTAG00000005844|ENSBTAT00000007681	193496	399785	160117	182854	158479	196971	92922	143368
ENSBTAP00000005611	2	1	44.46	0.0401338	3.69748	3	1	PWM	unstim	A6QLT5_BOVIN|UniProtKB/TrEMBL|ubiquitin-associated protein 2-like [Source:RefSeq peptide;Acc:NP_001096577]|3|ENSBTAG00000004271|ENSBTAT00000005611	230.402	722.475	665.284	2185.47	3199.32	3276.05	1315.33	6273.14
ENSBTAP00000024458	6	5	330.23	0.0401589	1.28241	2;3	2	unstim	PWM	SPSY_BOVIN|UniProtKB/Swiss-Prot|Spermine synthase [Source:UniProtKB/Swiss-Prot;Acc:Q3SZA5]|X|ENSBTAG00000018382|ENSBTAT00000024458	178997	264370	217100	196645	156568	175939	161401	174454
ENSBTAP00000012676	2	2	108.72	0.0402371	1.77165	2;3	2	PWM	unstim	ATAD3_BOVIN|UniProtKB/Swiss-Prot|ATPase family AAA domain-containing protein 3 [Source:UniProtKB/Swiss-Prot;Acc:A7YWC4]|16|ENSBTAG00000002219|ENSBTAT00000012676	26653.4	22375.9	28400.9	22780.3	33610.5	40062	43165.1	60700.8
ENSBTAP00000028162	13	13	842.84	0.0404411	1.21202	1;2;3	3	PWM	unstim	HNRPK_BOVIN|UniProtKB/Swiss-Prot|Heterogeneous nuclear ribonucleoprotein K [Source:UniProtKB/Swiss-Prot;Acc:Q3T0D0]|8|ENSBTAG00000021131|ENSBTAT00000028162	1.3534e+06	2.29513e+06	2.404e+06	1.95544e+06	1.72886e+06	2.5255e+06	2.70128e+06	2.75019e+06
ENSBTAP00000019440	1	1	23.28	0.0404639	1.52498	3	1	unstim	PWM	BPTF|HGNC Symbol|bromodomain PHD finger transcription factor [Source:HGNC Symbol;Acc:3581]|19|ENSBTAG00000014598|ENSBTAT00000019440	11530.3	13598.8	11179.6	7694.13	8558.65	6713.01	9479.36	4103.65
ENSBTAP00000045192	3	3	87.27	0.0404932	1.60724	1	1	PWM	unstim	MGAT2|HGNC Symbol|mannosyl (alpha-1,6-)-glycoprotein beta-1,2-N-acetylglucosaminyltransferase [Source:HGNC Symbol;Acc:7045]|10|ENSBTAG00000033891|ENSBTAT00000048092	19794.6	53981	15311.6	8510.11	39011.4	67559.1	25256.8	25035
ENSBTAP00000016708	34	31	2051.03	0.0405314	1.7594	1;2;3	3	PWM	unstim	F1MUZ9_BOVIN|UniProtKB/TrEMBL|60 kDa heat shock protein, mitochondrial [Source:RefSeq peptide;Acc:NP_001160080]|2|ENSBTAG00000012586|ENSBTAT00000016708	5.36594e+06	5.90929e+06	3.81516e+06	4.81871e+06	5.85452e+06	1.12229e+07	7.19874e+06	1.07518e+07
ENSBTAP00000025496	17	17	1243.72	0.0406768	1.53016	2;3	2	PWM	unstim	TCPB_BOVIN|UniProtKB/Swiss-Prot|T-complex protein 1 subunit beta [Source:UniProtKB/Swiss-Prot;Acc:Q3ZBH0]|5|ENSBTAG00000019156|ENSBTAT00000025496	1.93034e+06	1.98009e+06	1.83554e+06	1.94937e+06	2.08263e+06	3.27005e+06	2.79648e+06	3.62598e+06
ENSBTAP00000012481	1	1	32.07	0.0408006	1.69475	3	1	unstim	PWM	RPB7_BOVIN|UniProtKB/Swiss-Prot|DNA-directed RNA polymerase II subunit RPB7 [Source:UniProtKB/Swiss-Prot;Acc:Q5E9B8]|29|ENSBTAG00000009483|ENSBTAT00000012481	22371.9	28696.4	15146	20204.5	7971.39	24503	7335.26	11182.5
ENSBTAP00000028988	15	15	969.76	0.0409561	1.53372	2;3	2	unstim	PWM	Q9N1C2_BOVIN|UniProtKB/TrEMBL|annexin A5 [Source:RefSeq peptide;Acc:NP_001035567]|6|ENSBTAG00000021746|ENSBTAT00000028988	3.98185e+06	4.80777e+06	4.45667e+06	4.79094e+06	3.7511e+06	2.63055e+06	2.62736e+06	2.75147e+06
ENSBTAP00000021033;ENSBTAP00000048299	6	6	260.77	0.0409664	1.46768	2;3	2	PWM	unstim	RL18A_BOVIN|UniProtKB/Swiss-Prot|60S ribosomal protein L18a [Source:UniProtKB/Swiss-Prot;Acc:Q3T003]|7|ENSBTAG00000015831|ENSBTAT00000021033	1.10186e+06	1.16353e+06	924796	1.13445e+06	1.28241e+06	1.93058e+06	1.7012e+06	1.43298e+06
ENSBTAP00000051164	5	5	196.44	0.0410933	1.41346	3	1	unstim	PWM	BUB3_BOVIN|UniProtKB/Swiss-Prot|Mitotic checkpoint protein BUB3 [Source:UniProtKB/Swiss-Prot;Acc:Q1JQB2]|26|ENSBTAG00000017913|ENSBTAT00000057027	530580	644647	335010	505507	301051	493532	300871	330654
ENSBTAP00000045408	4	1	85.83	0.0412805	2.25104	2	1	PWM	unstim	A6H7D7_BOVIN|UniProtKB/TrEMBL|basic leucine zipper and W2 domain-containing protein 2 [Source:RefSeq peptide;Acc:NP_001098431]|4|ENSBTAG00000014262|ENSBTAT00000048357	4436.1	4769.24	4154.42	4603.41	4896.6	12018.7	10679.4	12841.1
ENSBTAP00000003549	11	10	411.12	0.0412842	4.06036	3	1	PWM	unstim	DNMT1_BOVIN|UniProtKB/Swiss-Prot|DNA (cytosine-5)-methyltransferase 1 [Source:UniProtKB/Swiss-Prot;Acc:Q24K09]|7|ENSBTAG00000002736|ENSBTAT00000003549	45269.4	37486.2	31670.1	72698.6	88903.7	175540	335348	160000
ENSBTAP00000027169	2	2	56.3	0.0413794	3.1992	1	1	PWM	unstim	Q3ZC60_BOVIN|UniProtKB/TrEMBL|OX-2 membrane glycoprotein [Source:RefSeq peptide;Acc:NP_001029792]|1|ENSBTAG00000033319|ENSBTAT00000027169	15432.7	66935.9	12871.1	15691.4	29763.8	128363	106703	90060.5
ENSBTAP00000007705;ENSBTAP00000050722	9	8	338.53	0.0414082	3.87732	3	1	PWM	unstim	Q05B94_BOVIN|UniProtKB/TrEMBL|structural maintenance of chromosomes protein 4 [Source:RefSeq peptide;Acc:NP_001098796]|1|ENSBTAG00000005862|ENSBTAT00000007705	29814.1	34015.2	22900.5	31481.6	38580.6	145470	164609	109683
ENSBTAP00000018645	7	7	300.93	0.0414762	2.60162	2;3	2	PWM	unstim	EIF3H_BOVIN|UniProtKB/Swiss-Prot|Eukaryotic translation initiation factor 3 subunit H [Source:UniProtKB/Swiss-Prot;Acc:Q56JZ5]|14|ENSBTAG00000014032|ENSBTAT00000018645	42559.9	53669.9	72056.2	57296.7	122499	102819	99606.4	261957
ENSBTAP00000019575	7	2	426.44	0.0416943	2.54305	2;3	2	PWM	unstim	RAP1A_BOVIN|UniProtKB/Swiss-Prot|Ras-related protein Rap-1A [Source:UniProtKB/Swiss-Prot;Acc:P62833]|3|ENSBTAG00000014710|ENSBTAT00000019575	2.47658e+06	330514	358528	401096	6.31524e+06	649858	1.56518e+06	540048
ENSBTAP00000021303	1	1	32.81	0.041814	1.83682	3	1	PWM	unstim	AMPM1_BOVIN|UniProtKB/Swiss-Prot|Methionine aminopeptidase 1 [Source:UniProtKB/Swiss-Prot;Acc:A6QLA4]|6|ENSBTAG00000016004|ENSBTAT00000021303	13511.3	12772.4	25913.9	13411.1	24595.4	28562.3	29916.4	37437.4
ENSBTAP00000003192	17	4	1195.04	0.0419228	1.19677	1;2;3	3	unstim	PWM	TBA4A_BOVIN|UniProtKB/Swiss-Prot|Tubulin alpha-4A chain [Source:UniProtKB/Swiss-Prot;Acc:P81948]|2|ENSBTAG00000030974|ENSBTAT00000003192	2.09374e+06	1.58734e+06	1.69686e+06	1.26979e+06	1.51979e+06	1.3877e+06	1.52064e+06	1.1266e+06
ENSBTAP00000045426;ENSBTAP00000053222	6	6	298.92	0.0419467	1.69117	2;3	2	PWM	unstim	NAA15|HGNC Symbol|N(alpha)-acetyltransferase 15, NatA auxiliary subunit [Source:HGNC Symbol;Acc:30782]|17|ENSBTAG00000004745|ENSBTAT00000048374	125931	94357	120976	122098	146230	230350	202206	204836
ENSBTAP00000010303	1	1	35.45	0.0422029	1.38341	2	1	unstim	PWM	CSAD|HGNC Symbol|cysteine sulfinic acid decarboxylase [Source:HGNC Symbol;Acc:18966]|5|ENSBTAG00000007829|ENSBTAT00000010303	7107.71	9327.31	10365.7	9939.72	6778.02	5918.82	7367.59	6493.44
ENSBTAP00000012929	17	9	726.75	0.0423986	1.24228	2;3	2	unstim	PWM	CFDP2|EntrezGene|craniofacial development protein 2 [Source:RefSeq peptide;Acc:NP_777225]|18|ENSBTAG00000009805|ENSBTAT00000012929	895043	1.2054e+06	808919	1.25086e+06	701439	963260	779938	904214
ENSBTAP00000008516;ENSBTAP00000053198	3	2	98.18	0.0425237	2.78367	3	1	unstim	PWM	MYO5A|HGNC Symbol|myosin VA (heavy chain 12, myoxin) [Source:HGNC Symbol;Acc:7602]|10|ENSBTAG00000006489|ENSBTAT00000008516	8948.69	20341.7	12606.1	8151.49	5022.48	3291.23	5498.81	4166.62
ENSBTAP00000023082	20	19	807.95	0.0427112	1.15041	2;3	2	PWM	unstim	DIAPH1|HGNC Symbol|diaphanous homolog 1 (Drosophila) [Source:HGNC Symbol;Acc:2876]|7|ENSBTAG00000030499|ENSBTAT00000023082	544718	447297	601995	566180	638949	479854	759152	607139
ENSBTAP00000002572	1	1	51.87	0.0427479	1.86664	1	1	PWM	unstim	SMAGP_BOVIN|UniProtKB/Swiss-Prot|Small cell adhesion glycoprotein [Source:UniProtKB/Swiss-Prot;Acc:A4IFL2]|5|ENSBTAG00000001983|ENSBTAT00000002572	36303.4	98896.7	23802.1	27967.3	48154.1	168794	79634	52422.8
ENSBTAP00000003923	2	2	93.16	0.0428472	1.14813	2	1	PWM	unstim	Q58D75_BOVIN|UniProtKB/TrEMBL|tyrosine-protein phosphatase non-receptor type 7 [Source:RefSeq peptide;Acc:NP_001035666]|16|ENSBTAG00000003016|ENSBTAT00000003923	10965.1	14643	15123	12823	13037.8	15056.3	18784.4	14608.7
ENSBTAP00000034009	4	4	192.07	0.0429186	6.70185	2;3	2	unstim	PWM	S10AC_BOVIN|UniProtKB/Swiss-Prot|Protein S100-A12 [Source:UniProtKB/Swiss-Prot;Acc:P79105]|3|ENSBTAG00000012638|ENSBTAT00000034108	1.11309e+06	2.4227e+06	3.51359e+06	889891	623929	352794	103189	104727
ENSBTAP00000019607	6	5	300.12	0.0429905	2.14776	3	1	PWM	unstim	NOP2|EntrezGene|nucleolar protein 1, 120kDa [Source:RefSeq peptide;Acc:NP_001095727]|5|ENSBTAG00000014733|ENSBTAT00000019607	189676	206160	109552	164702	237352	455244	411999	334599
ENSBTAP00000012170	4	2	161.1	0.0430547	1.54035	1;2	2	unstim	PWM	RAC1_BOVIN|UniProtKB/Swiss-Prot|Ras-related C3 botulinum toxin substrate 1 [Source:UniProtKB/Swiss-Prot;Acc:P62998]|25|ENSBTAG00000009233|ENSBTAT00000012170	174387	347068	333275	238406	155543	241641	164889	147595
ENSBTAP00000013337	3	3	97.39	0.0433033	3.11103	2	1	PWM	unstim	CDK1_BOVIN|UniProtKB/Swiss-Prot|Cyclin-dependent kinase 1 [Source:UniProtKB/Swiss-Prot;Acc:P48734]|28|ENSBTAG00000010109|ENSBTAT00000013337	40531.9	45308	51736.5	42200.9	46923.4	194754	151470	166145
ENSBTAP00000049908	4	4	188.46	0.043815	1.5698	3	1	PWM	unstim	Q17R04_BOVIN|UniProtKB/TrEMBL|cell division cycle and apoptosis regulator protein 1 [Source:RefSeq peptide;Acc:NP_001070000]|28|ENSBTAG00000047537|ENSBTAT00000053074	94262.2	61091.7	130831	110023	112279	134811	224775	150103
ENSBTAP00000048567	10	1	554.64	0.0439388	1.14613	3	1	unstim	PWM	PP1G_BOVIN|UniProtKB/Swiss-Prot|Serine/threonine-protein phosphatase PP1-gamma catalytic subunit [Source:UniProtKB/Swiss-Prot;Acc:P61287]|17|ENSBTAG00000011198|ENSBTAT00000057594	35419.6	62628.3	28425.4	41004.6	28930.6	54379.2	27854.5	34960.5
ENSBTAP00000009693	2	1	99.94	0.0439737	2.72426	2	1	unstim	PWM	Q3T0D2_BOVIN|UniProtKB/TrEMBL|secretory carrier-associated membrane protein 1 [Source:RefSeq peptide;Acc:NP_001069522]|10|ENSBTAG00000007371|ENSBTAT00000009693	27027.7	62563	50385.7	44521.7	14798	33262.7	6616.47	13046.9
ENSBTAP00000056302	14	14	877.21	0.0442843	1.44916	2;3	2	unstim	PWM	ARC1B_BOVIN|UniProtKB/Swiss-Prot|Actin-related protein 2/3 complex subunit 1B [Source:UniProtKB/Swiss-Prot;Acc:Q58CQ2]|25|ENSBTAG00000046248|ENSBTAT00000064158	5.00713e+06	6.22821e+06	4.96787e+06	5.43015e+06	4.38786e+06	4.59148e+06	3.21132e+06	2.73752e+06
ENSBTAP00000056626	11	1	504.76	0.0443889	2.31433	2;3	2	PWM	unstim	ADT2_BOVIN|UniProtKB/Swiss-Prot|ADP/ATP translocase 2 [Source:UniProtKB/Swiss-Prot;Acc:Q8SQH5]|X|ENSBTAG00000046037|ENSBTAT00000064551	32209	35637.7	62726.7	28284.6	76028.4	59562.3	98446.1	133613
ENSBTAP00000053652	1	1	30.38	0.0444011	1.49015	2	1	PWM	unstim	ATL2|HGNC Symbol|atlastin GTPase 2 [Source:HGNC Symbol;Acc:24047]|11|ENSBTAG00000016167|ENSBTAT00000061283	5330.23	9882.58	7407.37	6152.26	8042.9	10653.4	12284.7	11894.4
ENSBTAP00000019603	1	1	31.78	0.0444082	5.97445	3	1	PWM	unstim	F1N3G4_BOVIN|UniProtKB/TrEMBL|Condensin complex subunit 1 [Source:UniProtKB/TrEMBL;Acc:F1N3G4]|5|ENSBTAG00000014730|ENSBTAT00000019603	3292.14	659.399	1641.93	3128.18	4643.27	10377.5	20523	16563.3
ENSBTAP00000002972;ENSBTAP00000056119	15	15	548.14	0.044448	1.14838	1;2;3	3	PWM	unstim	GLG1|HGNC Symbol|golgi glycoprotein 1 [Source:HGNC Symbol;Acc:4316]|18|ENSBTAG00000002303|ENSBTAT00000002972	362881	450167	311352	287647	450674	532415	330601	307883
ENSBTAP00000030598	5	3	171.81	0.0446561	5.07108	3	1	PWM	unstim	DHX30|EntrezGene|putative ATP-dependent RNA helicase DHX30 [Source:RefSeq peptide;Acc:NP_001070003]|22|ENSBTAG00000015833|ENSBTAT00000030623	2888.89	1187.73	7577.88	2225.65	12749.9	1724.26	29843.9	26069.3
ENSBTAP00000020952	4	4	155.42	0.0446794	1.90124	3	1	unstim	PWM	PML|HGNC Symbol|promyelocytic leukemia [Source:HGNC Symbol;Acc:9113]|21|ENSBTAG00000015779|ENSBTAT00000020952	94302	155814	78351.4	61241	53319.6	58898.7	68688.9	24068.6
ENSBTAP00000028781	5	2	205.23	0.04494	3.62649	2;3	2	PWM	unstim	E1BED6_BOVIN|UniProtKB/TrEMBL|Uncharacterized protein [Source:UniProtKB/TrEMBL;Acc:E1BED6]|4|ENSBTAG00000022498|ENSBTAT00000028781	14701.3	28498.6	15494.7	38169.2	99792.8	37580.5	41968.9	171934
ENSBTAP00000000541;ENSBTAP00000007153	2	2	57.7	0.04498	1.5255	3	1	PWM	unstim	RBM4_BOVIN|UniProtKB/Swiss-Prot|RNA-binding protein 4 [Source:UniProtKB/Swiss-Prot;Acc:Q3MHX3]|29|ENSBTAG00000031688|ENSBTAT00000000541	12850.8	14810.7	12898.4	18086.1	17037.5	26986.3	24802.4	20638.2
ENSBTAP00000019475	16	14	631.81	0.0449934	1.41317	2;3	2	PWM	unstim	SYRC_BOVIN|UniProtKB/Swiss-Prot|Arginyl-tRNA synthetase, cytoplasmic [Source:UniProtKB/Swiss-Prot;Acc:A7YW98]|7|ENSBTAG00000014626|ENSBTAT00000019475	526389	509397	536483	442393	558089	755126	768849	764991
ENSBTAP00000010787	9	9	293.35	0.0451488	1.25076	1;2	2	PWM	unstim	GLU2B_BOVIN|UniProtKB/Swiss-Prot|Glucosidase 2 subunit beta [Source:UniProtKB/Swiss-Prot;Acc:Q28034]|7|ENSBTAG00000008202|ENSBTAT00000010787	621032	1.12171e+06	486981	371489	876591	1.24702e+06	562783	567092
ENSBTAP00000005990	1	1	50.79	0.0452602	2.01535	2;3	2	PWM	unstim	ELP4|EntrezGene|elongator complex protein 4 [Source:RefSeq peptide;Acc:NP_001033773]|15|ENSBTAG00000023831|ENSBTAT00000005990	2301.59	2763.24	4958.45	2490.89	3832.84	3480.18	9931.95	7975.44
ENSBTAP00000036278	4	4	245.48	0.0455831	1.17436	2;3	2	unstim	PWM	CN37_BOVIN|UniProtKB/Swiss-Prot|2',3'-cyclic-nucleotide 3'-phosphodiesterase [Source:UniProtKB/Swiss-Prot;Acc:P06623]|19|ENSBTAG00000025762|ENSBTAT00000036420	444057	400391	426119	557079	411991	333886	389433	420987
ENSBTAP00000004549	3	3	98.1	0.0456244	1.17627	2	1	unstim	PWM	SAC1_BOVIN|UniProtKB/Swiss-Prot|Phosphatidylinositide phosphatase SAC1 [Source:UniProtKB/Swiss-Prot;Acc:A6QL88]|22|ENSBTAG00000003501|ENSBTAT00000004549	36749.8	37321	40833.1	32166.2	28913.4	36547.5	34114.2	25455.9
ENSBTAP00000040467	2	2	61.76	0.0458333	1.47649	1;2	2	PWM	unstim	QSOX2|HGNC Symbol|quiescin Q6 sulfhydryl oxidase 2 [Source:HGNC Symbol;Acc:30249]|11|ENSBTAG00000011129|ENSBTAT00000042859	21228.5	38341.1	16786.2	15847.8	36598.4	48398	19826.7	31314.9
ENSBTAP00000023164	2	1	121.44	0.045945	1.53903	2;3	2	PWM	unstim	VAPB_BOVIN|UniProtKB/Swiss-Prot|Vesicle-associated membrane protein-associated protein B [Source:UniProtKB/Swiss-Prot;Acc:A2VDZ9]|13|ENSBTAG00000017424|ENSBTAT00000023164	8047.91	11116.1	10707.2	14270.5	16904	19271.7	16040.1	15719.4
ENSBTAP00000011801	2	2	86.23	0.0459624	3.93559	2	1	PWM	unstim	E1BGS2_BOVIN|UniProtKB/TrEMBL|Uncharacterized protein [Source:UniProtKB/TrEMBL;Acc:E1BGS2]|17|ENSBTAG00000001164|ENSBTAT00000011801	1051.3	6177.02	2221.2	2443.87	7339.86	7342.48	11137.1	20988.1
ENSBTAP00000043937	2	2	154.24	0.0460522	1.64856	2;3	2	PWM	unstim	RS24_BOVIN|UniProtKB/Swiss-Prot|40S ribosomal protein S24 [Source:UniProtKB/Swiss-Prot;Acc:Q56JU9]|28|ENSBTAG00000013264|ENSBTAT00000046662	364022	453375	525859	432910	640028	593838	665651	1.0286e+06
ENSBTAP00000012167	1	1	20.99	0.0460867	1.69916	2	1	PWM	unstim	NSDHL_BOVIN|UniProtKB/Swiss-Prot|Sterol-4-alpha-carboxylate 3-dehydrogenase, decarboxylating [Source:UniProtKB/Swiss-Prot;Acc:Q3ZBE9]|X|ENSBTAG00000009231|ENSBTAT00000012167	22878.6	24631.8	19729.8	21478.2	24366.7	42302.9	41630.6	42446.8
ENSBTAP00000038997	1	1	44.43	0.046247	1.16988	1	1	unstim	PWM	SLC12A7|HGNC Symbol|solute carrier family 12 (potassium/chloride transporters), member 7 [Source:HGNC Symbol;Acc:10915]|20|ENSBTAG00000006775|ENSBTAT00000039197	20719.9	4596.4	4803.06	3981.9	18427.8	3243.21	3829.45	3648.9
ENSBTAP00000050046;ENSBTAP00000002400	2	2	99.92	0.0463154	1.35742	1	1	PWM	unstim	A6QQ36_BOVIN|UniProtKB/TrEMBL|Putative uncharacterized protein [Source:UniProtKB/TrEMBL;Acc:A6QQ36]|9|ENSBTAG00000038112|ENSBTAT00000055373	114602	53796	66996	6673.37	143739	90341.7	87023.3	7482.8
ENSBTAP00000008962	1	1	33.4	0.0464891	1.33077	3	1	unstim	PWM	PECR|HGNC Symbol|peroxisomal trans-2-enoyl-CoA reductase [Source:HGNC Symbol;Acc:18281]|2|ENSBTAG00000006821|ENSBTAT00000008962	28939.3	47303.1	18203.7	29416.4	26525.9	29490.1	12959.7	24099.9
ENSBTAP00000054753	2	1	54.04	0.0465356	1.54434	2;3	2	PWM	unstim	|||X|ENSBTAG00000046678|ENSBTAT00000066058	3733.1	6269.73	2934.26	4295.11	4901.54	8194.98	6933.29	6582.61
ENSBTAP00000014593	6	5	236.79	0.0465741	3.16625	2	1	unstim	PWM	CATH_BOVIN|UniProtKB/Swiss-Prot|Pro-cathepsin HCathepsin H mini chainCathepsin HCathepsin H heavy chainCathepsin H light chain [Source:UniProtKB/Swiss-Prot;Acc:Q3T0I2]|21|ENSBTAG00000010992|ENSBTAT00000014593	313806	287339	237174	518988	202028	117038	53444.1	56169.3
ENSBTAP00000001989	1	1	35	0.0466492	7.91762	3	1	PWM	unstim	I20L2_BOVIN|UniProtKB/Swiss-Prot|Interferon-stimulated 20 kDa exonuclease-like 2 [Source:UniProtKB/Swiss-Prot;Acc:Q2YDK1]|3|ENSBTAG00000001518|ENSBTAT00000001989	460.681	6.05694	179.8	2500.84	4940.95	3141.48	6115.98	10721.3
ENSBTAP00000026553	11	11	334.92	0.0468822	1.75158	1	1	PWM	unstim	Q8MKD4_BOVIN|UniProtKB/TrEMBL|integrin alpha-V [Source:RefSeq peptide;Acc:NP_776792]|2|ENSBTAG00000019929|ENSBTAT00000026553	240581	294604	238986	186868	613151	351790	350228	368163
ENSBTAP00000002268	5	5	258.86	0.0470105	1.34608	3	1	unstim	PWM	GLYR1_BOVIN|UniProtKB/Swiss-Prot|Putative oxidoreductase GLYR1 [Source:UniProtKB/Swiss-Prot;Acc:A4FUF0]|25|ENSBTAG00000001731|ENSBTAT00000002268	130165	146860	207130	133638	118748	89513.7	141798	108895
ENSBTAP00000023117	11	10	446.81	0.0470496	1.53554	2;3	2	PWM	unstim	GCN1L1|HGNC Symbol|GCN1 general control of amino-acid synthesis 1-like 1 (yeast) [Source:HGNC Symbol;Acc:4199]|17|ENSBTAG00000017379|ENSBTAT00000023117	169056	140774	187659	127464	181517	271497	278306	228320
ENSBTAP00000024299	2	2	194.07	0.0471797	1.47668	2;3	2	unstim	PWM	SRSF2_BOVIN|UniProtKB/Swiss-Prot|Serine/arginine-rich splicing factor 2 [Source:UniProtKB/Swiss-Prot;Acc:Q3MHR5]|19|ENSBTAG00000018258|ENSBTAT00000024299	628425	888628	459015	893552	431862	711227	367530	432679
ENSBTAP00000017500	17	7	1061.84	0.0472962	1.60091	2;3	2	unstim	PWM	HS71A_BOVIN|UniProtKB/Swiss-Prot|Heat shock 70 kDa protein 1A [Source:UniProtKB/Swiss-Prot;Acc:Q27975]|23|ENSBTAG00000025441|ENSBTAT00000017500	1.18801e+06	972153	1.11301e+06	1.17348e+06	961487	726043	601784	488266
ENSBTAP00000009904	8	7	456.45	0.0473644	1.20837	2;3	2	unstim	PWM	Q2KIA8_BOVIN|UniProtKB/TrEMBL|rap1 GTPase-GDP dissociation stimulator 1 [Source:RefSeq peptide;Acc:NP_777091]|6|ENSBTAG00000007522|ENSBTAT00000009904	294354	267936	246119	236469	208248	221467	220656	214330
ENSBTAP00000022955	5	5	120.84	0.04742	2.38173	1	1	unstim	PWM	A2VE93_BOVIN|UniProtKB/TrEMBL|leucine-rich repeat-containing protein 25 precursor [Source:RefSeq peptide;Acc:NP_777113]|7|ENSBTAG00000017273|ENSBTAT00000022955	160075	147832	161832	162864	101866	88341	29508.1	45891.3
ENSBTAP00000022610	2	1	50.08	0.0474219	1.63083	3	1	PWM	unstim	RBM28|HGNC Symbol|RNA binding motif protein 28 [Source:HGNC Symbol;Acc:21863]|4|ENSBTAG00000017001|ENSBTAT00000022610	13057.1	5953.99	6858.14	7657.09	16686.1	13274	14999.7	9716.01
ENSBTAP00000019100	9	9	454.24	0.0474458	1.44425	3	1	unstim	PWM	PRP19_BOVIN|UniProtKB/Swiss-Prot|Pre-mRNA-processing factor 19 [Source:UniProtKB/Swiss-Prot;Acc:Q08E38]|29|ENSBTAG00000014366|ENSBTAT00000019100	1.13541e+06	1.19933e+06	776931	892982	610184	873007	713709	575924
ENSBTAP00000014735	3	3	202.51	0.0474738	2.314	2	1	unstim	PWM	F1N455_BOVIN|UniProtKB/TrEMBL|dipeptidyl peptidase 1 [Source:RefSeq peptide;Acc:NP_001028789]|29|ENSBTAG00000011100|ENSBTAT00000014735	150304	197380	153843	247863	127942	71492.7	65928.7	58487.2
ENSBTAP00000012570;ENSBTAP00000018688	3	2	150.7	0.0475923	1.15578	2;3	2	unstim	PWM	F1N7J2_BOVIN|UniProtKB/TrEMBL|plasma membrane calcium-transporting ATPase 1 [Source:RefSeq peptide;Acc:NP_777121]|5|ENSBTAG00000009552|ENSBTAT00000012570	46323.2	40418.8	59475.5	47252.5	45267.4	34843.9	49980.2	37302.1
ENSBTAP00000056536;ENSBTAP00000012526	5	4	246.38	0.0476905	1.45538	2;3	2	unstim	PWM	ARF6|HGNC Symbol|ADP-ribosylation factor 6 [Source:HGNC Symbol;Acc:659]|10|ENSBTAG00000045980|ENSBTAT00000063023	259716	330790	301857	268143	167161	179124	196618	254489
ENSBTAP00000015581	8	5	450.05	0.0477934	1.59124	2;3	2	unstim	PWM	RAB5C_BOVIN|UniProtKB/Swiss-Prot|Ras-related protein Rab-5C [Source:UniProtKB/Swiss-Prot;Acc:Q58DS9]|19|ENSBTAG00000006982|ENSBTAT00000015581	542440	581565	625655	613384	494909	280069	305841	404217
ENSBTAP00000002157	3	2	92.33	0.0478272	7.85992	3	1	PWM	unstim	MDN1|HGNC Symbol|MDN1, midasin homolog (yeast) [Source:HGNC Symbol;Acc:18302]|9|ENSBTAG00000001644|ENSBTAT00000002157	1256.12	2990.47	1350.45	1073.7	2978.7	7620.06	32263.5	9569.24
ENSBTAP00000012519	1	1	68.27	0.0480408	12.6	3	1	unstim	PWM	TGFBI|HGNC Symbol|transforming growth factor, beta-induced, 68kDa [Source:HGNC Symbol;Acc:11771]|7|ENSBTAG00000009513|ENSBTAT00000012519	24568	13699.4	8490.01	19783.3	1323.81	36.4869	3346.89	573.829
ENSBTAP00000002033;ENSBTAP00000013110;ENSBTAP00000016590;ENSBTAP00000030479;ENSBTAP00000036013	7	6	345.8	0.0481913	2.03149	2;3	2	PWM	unstim	ROA1_BOVIN|UniProtKB/Swiss-Prot|Heterogeneous nuclear ribonucleoprotein A1 [Source:UniProtKB/Swiss-Prot;Acc:P09867]|5|ENSBTAG00000001553|ENSBTAT00000002033	574468	1.05503e+06	1.14883e+06	750377	1.23712e+06	2.54724e+06	1.23683e+06	2.14733e+06
ENSBTAP00000031125	8	2	274.15	0.0482799	2.29027	1;2	2	PWM	unstim	A7YWH4_BOVIN|UniProtKB/TrEMBL|major histocompatibility complex, class I, A [Source:RefSeq peptide;Acc:NP_001108327]|23|ENSBTAG00000005182|ENSBTAT00000031166	160480	170055	1.11008e+06	2.91263e+06	181283	266729	2.43933e+06	7.08277e+06
ENSBTAP00000022271	9	9	404.94	0.0484609	2.39784	3	1	PWM	unstim	NAT10|EntrezGene|N-acetyltransferase 10 [Source:RefSeq peptide;Acc:NP_001091500]|15|ENSBTAG00000016747|ENSBTAT00000022271	93072.3	95135.1	86320.6	75033.6	134509	140954	330560	232171
ENSBTAP00000049383;ENSBTAP00000038330	8	5	370.64	0.0485761	1.18135	1;2;3	3	PWM	unstim	PCBP1_BOVIN|UniProtKB/Swiss-Prot|Poly(rC)-binding protein 1 [Source:UniProtKB/Swiss-Prot;Acc:Q5E9A3]|11|ENSBTAG00000008985|ENSBTAT00000011824	967387	1.14566e+06	1.16934e+06	878741	1.0999e+06	1.25136e+06	1.34607e+06	1.21842e+06
ENSBTAP00000056220	4	2	176.29	0.0486648	1.19798	2;3	2	unstim	PWM	RAB5A|EntrezGene|ras-related protein Rab-5A [Source:RefSeq peptide;Acc:NP_001069654]|1|ENSBTAG00000046385|ENSBTAT00000064563	26130	29804.4	18339.7	45683.3	23303.2	20649.7	14730.1	41450
ENSBTAP00000005331;ENSBTAP00000025528	3	3	117.32	0.0490833	2.17734	3	1	PWM	unstim	TIAL1|HGNC Symbol|TIA1 cytotoxic granule-associated RNA binding protein-like 1 [Source:HGNC Symbol;Acc:11804]|26|ENSBTAG00000004080|ENSBTAT00000005331	14735.4	5266.34	44833.7	20293.2	31217.5	23005.6	54547.6	76583
ENSBTAP00000019679	2	1	42.51	0.0491503	1.91147	2	1	PWM	unstim	B0JYP8_BOVIN|UniProtKB/TrEMBL|cystathionine gamma-lyase [Source:RefSeq peptide;Acc:NP_001019738]|3|ENSBTAG00000014791|ENSBTAT00000019679	1815.97	15081	6152.28	5457.04	6864.33	16544.5	16268.4	14811.9
ENSBTAP00000022780	4	4	233.86	0.0491773	1.72159	2	1	unstim	PWM	STX7_BOVIN|UniProtKB/Swiss-Prot|Syntaxin-7 [Source:UniProtKB/Swiss-Prot;Acc:Q3ZBT5]|9|ENSBTAG00000017139|ENSBTAT00000022780	126971	267683	100137	138938	108551	108093	62084.6	89379.2
ENSBTAP00000039829;ENSBTAP00000049531;ENSBTAP00000051516	3	3	119.34	0.0495734	1.31277	2;3	2	PWM	unstim	RS25_BOVIN|UniProtKB/Swiss-Prot|40S ribosomal protein S25 [Source:UniProtKB/Swiss-Prot;Acc:Q56JX5]|15|ENSBTAG00000027772|ENSBTAT00000040046	1.44142e+06	1.89933e+06	911067	1.5815e+06	1.94116e+06	2.57611e+06	1.47728e+06	1.66324e+06
ENSBTAP00000002243	2	2	66.83	0.0495987	1.1881	1;2	2	unstim	PWM	Q1JQ95_BOVIN|UniProtKB/TrEMBL|CKLF-like MARVEL transmembrane domain-containing protein 7 [Source:RefSeq peptide;Acc:NP_001069428]|22|ENSBTAG00000001712|ENSBTAT00000002243	71803.7	145213	65756.6	42953.6	67160.3	126327	46272.3	34400
ENSBTAP00000006605;ENSBTAP00000053236	3	2	68.81	0.0498638	1.16017	3	1	unstim	PWM	AP3B1_BOVIN|UniProtKB/Swiss-Prot|AP-3 complex subunit beta-1 [Source:UniProtKB/Swiss-Prot;Acc:Q32PG1]|10|ENSBTAG00000005016|ENSBTAT00000006605	27271.3	22352.5	22945.9	34418.1	26100.6	20003.2	19518.5	26594.9
ENSBTAP00000002261	2	2	116.22	0.0500516	2.95122	2	1	unstim	PWM	Q29RN2_BOVIN|UniProtKB/TrEMBL|glycogenin-1 [Source:RefSeq peptide;Acc:NP_001039332]|1|ENSBTAG00000001721|ENSBTAT00000002261	56204.2	127165	77850.7	72145.9	19307.9	16000.3	24564.8	53085.7
ENSBTAP00000056178	2	2	73.83	0.0501228	1.9438	2	1	PWM	unstim	STX11|HGNC Symbol|syntaxin 11 [Source:HGNC Symbol;Acc:11429]|9|ENSBTAG00000011236|ENSBTAT00000014922	4351.48	5009.14	4236.04	4656.43	6577.16	6294.73	8444.8	14163.6
ENSBTAP00000029245;ENSBTAP00000013453;ENSBTAP00000025810;ENSBTAP00000049648;ENSBTAP00000054759;ENSBTAP00000055238	14	14	747.21	0.0501418	1.65406	1;2;3	3	unstim	PWM	H4_BOVIN|UniProtKB/Swiss-Prot|Histone H4 [Source:UniProtKB/Swiss-Prot;Acc:P62803]|5|ENSBTAG00000030504|ENSBTAT00000029245	1.84218e+08	3.79499e+08	1.64096e+08	1.50109e+08	1.68556e+08	1.70643e+08	1.06495e+08	8.50736e+07
ENSBTAP00000037502	2	2	66.6	0.0504267	1.29883	2	1	PWM	unstim	Q862E4_BOVIN|UniProtKB/TrEMBL|cation-independent mannose-6-phosphate receptor [Source:RefSeq peptide;Acc:NP_776777]|9|ENSBTAG00000002402|ENSBTAT00000037678	30163.7	19602.8	28595.1	25649.3	31654.4	24529.9	39579.1	39329.4
ENSBTAP00000010507	5	5	213.96	0.050453	1.4976	2;3	2	unstim	PWM	A2VDN8_BOVIN|UniProtKB/TrEMBL|coronin-1C [Source:RefSeq peptide;Acc:NP_001075059]|17|ENSBTAG00000007993|ENSBTAT00000010507	384214	534811	376307	452591	365199	286419	254510	261024
ENSBTAP00000049910	4	4	235.08	0.0504905	2.2321	2;3	2	unstim	PWM	F1MMU4_BOVIN|UniProtKB/TrEMBL|Uncharacterized protein [Source:UniProtKB/TrEMBL;Acc:F1MMU4]|22|ENSBTAG00000040116|ENSBTAT00000052022	1.33721e+07	1.41344e+07	5.68973e+06	1.34977e+07	7.69285e+06	4.90122e+06	4.62821e+06	3.69704e+06
ENSBTAP00000025175	14	13	478.81	0.0505876	1.29691	2;3	2	unstim	PWM	ARHGEF1|HGNC Symbol|Rho guanine nucleotide exchange factor (GEF) 1 [Source:HGNC Symbol;Acc:681]|18|ENSBTAG00000018912|ENSBTAT00000025175	507062	516843	676892	638730	469216	441467	453349	439885
ENSBTAP00000014966	4	4	220.32	0.0507408	1.38112	2;3	2	PWM	unstim	IF6_BOVIN|UniProtKB/Swiss-Prot|Eukaryotic translation initiation factor 6 [Source:UniProtKB/Swiss-Prot;Acc:Q9TU47]|13|ENSBTAG00000011263|ENSBTAT00000014966	168284	165722	160384	188942	191445	193227	242746	316346
ENSBTAP00000034086;ENSBTAP00000044384	4	4	131.29	0.0508813	1.74761	2;3	2	unstim	PWM	H33_BOVIN|UniProtKB/Swiss-Prot|Histone H3.3 [Source:UniProtKB/Swiss-Prot;Acc:Q5E9F8]|16|ENSBTAG00000024561|ENSBTAT00000034186	6.97413e+07	1.47461e+08	4.91909e+07	6.1832e+07	5.12037e+07	6.49211e+07	4.18707e+07	2.98179e+07
ENSBTAP00000002492	3	3	91.1	0.0509286	1.53023	1	1	PWM	unstim	APOH|EntrezGene|beta-2-glycoprotein 1 precursor [Source:RefSeq peptide;Acc:NP_776417]|19|ENSBTAG00000001915|ENSBTAT00000002492	145958	281770	158842	77796.7	247392	366675	206362	196203
ENSBTAP00000005324	6	4	274.87	0.0510618	1.35084	2;3	2	unstim	PWM	CAZA2_BOVIN|UniProtKB/Swiss-Prot|F-actin-capping protein subunit alpha-2 [Source:UniProtKB/Swiss-Prot;Acc:Q5E997]|4|ENSBTAG00000004072|ENSBTAT00000005324	207031	281328	177043	227290	185756	186020	150141	138924
ENSBTAP00000030640	1	1	20.24	0.0511547	3.50046	2	1	PWM	unstim	VPRBP|HGNC Symbol|Vpr (HIV-1) binding protein [Source:HGNC Symbol;Acc:30911]|22|ENSBTAG00000006501|ENSBTAT00000030668	93.4255	108.862	659.302	269.791	747.182	150.3	1603.3	1459.57
ENSBTAP00000016620	12	12	536.63	0.0511815	3.92654	2;3	2	unstim	PWM	XDH|EntrezGene|xanthine dehydrogenase/oxidase [Source:RefSeq peptide;Acc:NP_776397]|11|ENSBTAG00000012519|ENSBTAT00000016620	426823	978111	733555	956432	396591	139232	118517	133866
ENSBTAP00000016043	2	2	56.4	0.0512383	1.17617	1	1	PWM	unstim	TMEM87B|HGNC Symbol|transmembrane protein 87B [Source:HGNC Symbol;Acc:25913]|11|ENSBTAG00000012099|ENSBTAT00000016043	33842.4	82745	28384.3	17963.5	47991.7	85458.7	36099.3	22090.5
ENSBTAP00000016410	4	2	183.02	0.051475	1.77715	2	1	unstim	PWM	AN32A_BOVIN|UniProtKB/Swiss-Prot|Acidic leucine-rich nuclear phosphoprotein 32 family member A [Source:UniProtKB/Swiss-Prot;Acc:P51122]|10|ENSBTAG00000012365|ENSBTAT00000016410	80910.6	192410	150822	113635	49200.5	83798.2	64970.6	104638
ENSBTAP00000006190;ENSBTAP00000054114	2	1	187.79	0.0515106	1.63516	2;3	2	unstim	PWM	DYL2_BOVIN|UniProtKB/Swiss-Prot|Dynein light chain 2, cytoplasmic [Source:UniProtKB/Swiss-Prot;Acc:Q3MHR3]|19|ENSBTAG00000025313|ENSBTAT00000006190	138399	202000	210213	138566	104947	158851	81893.7	75782
ENSBTAP00000013635	3	2	110.56	0.0517481	1.99454	2;3	2	PWM	unstim	GTPB1_BOVIN|UniProtKB/Swiss-Prot|GTP-binding protein 1 [Source:UniProtKB/Swiss-Prot;Acc:Q58DC5]|5|ENSBTAG00000010324|ENSBTAT00000013635	46927.7	18316.5	21250	28747.8	51643.2	41085.5	72240.7	64885.4
ENSBTAP00000044053	1	1	54.22	0.0519923	1.49364	2	1	unstim	PWM	IR3IP_BOVIN|UniProtKB/Swiss-Prot|Immediate early response 3-interacting protein 1 [Source:UniProtKB/Swiss-Prot;Acc:Q1JQC2]|24|ENSBTAG00000032961|ENSBTAT00000046794	88973.6	99605.6	48315.3	64552.5	65842.6	47109.7	35314.7	53553.1
ENSBTAP00000051545;ENSBTAP00000000359	13	11	717.44	0.0521319	1.28026	2;3	2	unstim	PWM	K6PL_BOVIN|UniProtKB/Swiss-Prot|6-phosphofructokinase, liver type [Source:UniProtKB/Swiss-Prot;Acc:A1A4J1]|1|ENSBTAG00000010658|ENSBTAT00000056305	397848	491778	439978	468095	318242	324707	311997	449220
ENSBTAP00000022763;ENSBTAP00000022772	27	27	1480.46	0.0522224	2.09284	1;2;3	3	unstim	PWM	ALB|EntrezGene|serum albumin precursor [Source:RefSeq peptide;Acc:NP_851335]|6|ENSBTAG00000017121|ENSBTAT00000022763	3.70017e+07	1.72066e+07	1.57121e+07	1.05952e+07	1.04699e+07	1.43141e+07	8.39316e+06	5.29476e+06
ENSBTAP00000010081;ENSBTAP00000053355	8	7	301.35	0.0523121	1.54741	2;3	2	unstim	PWM	MYO1F|HGNC Symbol|myosin IF [Source:HGNC Symbol;Acc:7600]|7|ENSBTAG00000007661|ENSBTAT00000010081	200846	123788	258126	168392	183281	52944.1	140830	108370
ENSBTAP00000007948	5	2	126.4	0.0525764	1.3153	2	1	PWM	unstim	BZW1|HGNC Symbol|basic leucine zipper and W2 domains 1 [Source:HGNC Symbol;Acc:18380]|2|ENSBTAG00000006049|ENSBTAT00000007948	58479.7	66307.7	78614	55843.1	65192.3	102945	89798	83049.6
ENSBTAP00000009160;ENSBTAP00000044686	6	6	257.47	0.0525884	1.76019	2;3	2	PWM	unstim	OLA1_BOVIN|UniProtKB/Swiss-Prot|Obg-like ATPase 1 [Source:UniProtKB/Swiss-Prot;Acc:Q2HJ33]|2|ENSBTAG00000006970|ENSBTAT00000009160	131500	121017	171499	181720	225680	348957	269893	221679
ENSBTAP00000009977	3	3	166.72	0.053088	1.19198	2	1	unstim	PWM	INPP_BOVIN|UniProtKB/Swiss-Prot|Inositol polyphosphate 1-phosphatase [Source:UniProtKB/Swiss-Prot;Acc:P21327]|2|ENSBTAG00000007584|ENSBTAT00000009977	56614.8	94123.2	73890.3	66926.4	53290.8	84941.9	55040.6	51322.9
ENSBTAP00000008799	4	4	158.67	0.0537546	1.07722	2;3	2	PWM	unstim	COPD_BOVIN|UniProtKB/Swiss-Prot|Coatomer subunit delta [Source:UniProtKB/Swiss-Prot;Acc:P53619]|15|ENSBTAG00000006690|ENSBTAT00000008799	150230	181907	160085	174788	157062	186249	181524	193681
ENSBTAP00000006451	1	1	28.14	0.0539056	1.47272	3	1	unstim	PWM	INTS8|EntrezGene|integrator complex subunit 8 [Source:RefSeq peptide;Acc:NP_001096026]|14|ENSBTAG00000004902|ENSBTAT00000006451	22041.1	10123.8	8087.82	5441.77	18242.4	4134.67	6057.31	2593.02
ENSBTAP00000025104;ENSBTAP00000042661	2	2	58.94	0.0539185	1.78447	3	1	PWM	unstim	SCAF4|HGNC Symbol|SR-related CTD-associated factor 4 [Source:HGNC Symbol;Acc:19304]|1|ENSBTAG00000018855|ENSBTAT00000025104	10630.2	15625.5	30142.8	14794.8	27266	18486.8	43965.1	37324.5
ENSBTAP00000038979	1	1	29.75	0.0541509	1.65173	3	1	unstim	PWM	A5PK80_BOVIN|UniProtKB/TrEMBL|TP53-regulating kinase [Source:RefSeq peptide;Acc:NP_001092650]|13|ENSBTAG00000027326|ENSBTAT00000039179	23896.4	31250.8	13594.9	25075.7	15370.4	14768.5	12886.2	13774.8
ENSBTAP00000007423	2	2	56.81	0.0542014	1.46747	2	1	unstim	PWM	GYS1_BOVIN|UniProtKB/Swiss-Prot|Glycogen [starch] synthase, muscle [Source:UniProtKB/Swiss-Prot;Acc:A7MB78]|18|ENSBTAG00000039958|ENSBTAT00000007423	51770.1	34147.2	66948.7	35561.4	42519.8	29689.3	36135.2	20058.5
ENSBTAP00000018774	2	2	75.77	0.0546116	4.45623	1	1	PWM	unstim	Q9TVB3_BOVIN|UniProtKB/TrEMBL|prostaglandin G/H synthase 2 [Source:RefSeq peptide;Acc:NP_776870]|16|ENSBTAG00000014127|ENSBTAT00000018774	629.634	31652.9	262.616	396.694	4867.17	70785.4	47231.5	23912.3
ENSBTAP00000011976	2	2	103.23	0.0547016	1.82714	2	1	unstim	PWM	ATG3_BOVIN|UniProtKB/Swiss-Prot|Ubiquitin-like-conjugating enzyme ATG3 [Source:UniProtKB/Swiss-Prot;Acc:Q0VCL3]|1|ENSBTAG00000009084|ENSBTAT00000011976	25663.1	51503.2	36103.2	32585.4	23159.1	18958.3	18048.8	19660.5
ENSBTAP00000043412	3	3	123.21	0.0547826	1.55567	2;3	2	PWM	unstim	SCFD1|HGNC Symbol|sec1 family domain containing 1 [Source:HGNC Symbol;Acc:20726]|21|ENSBTAG00000017565|ENSBTAT00000046085	35521.4	26917.4	27436.3	51837.1	50247.6	32733.8	63932.9	73542.6
ENSBTAP00000043615	7	7	251.64	0.055092	1.34623	1;3	2	unstim	PWM	A5PK81_BOVIN|UniProtKB/TrEMBL|Uncharacterized protein [Source:UniProtKB/TrEMBL;Acc:E1B7X5]|10|ENSBTAG00000000431|ENSBTAT00000046304	442245	170240	259887	272759	292008	166384	200096	192134
ENSBTAP00000042312	6	5	171.57	0.0551935	1.4294	2	1	PWM	unstim	PSMD8|EntrezGene|26S proteasome non-ATPase regulatory subunit 8 [Source:RefSeq peptide;Acc:NP_001030283]|18|ENSBTAG00000031641|ENSBTAT00000044859	142560	136061	126139	108513	146717	219735	179348	187875
ENSBTAP00000012328	4	2	109.05	0.055217	2.09102	3	1	unstim	PWM	SYNE1|HGNC Symbol|spectrin repeat containing, nuclear envelope 1 [Source:HGNC Symbol;Acc:17089]|9|ENSBTAG00000009362|ENSBTAT00000012328	8092.19	7918.11	9580.3	2878.99	2382.87	1922.81	7653.96	1655.53
ENSBTAP00000053858	14	9	749.72	0.0554285	3.35514	3	1	PWM	unstim	E1B794_BOVIN|UniProtKB/TrEMBL|Uncharacterized protein [Source:UniProtKB/TrEMBL;Acc:F1MDU7]|19|ENSBTAG00000019262|ENSBTAT00000061367	62280.7	183605	60928.4	62268.7	104437	332262	522904	278723
ENSBTAP00000024203	9	9	490.56	0.0555176	3.38637	2	1	unstim	PWM	PDXK_BOVIN|UniProtKB/Swiss-Prot|Pyridoxal kinase [Source:UniProtKB/Swiss-Prot;Acc:Q0II59]|1|ENSBTAG00000018186|ENSBTAT00000024203	479420	1.19045e+06	651576	1.25087e+06	468957	222937	134367	228649
ENSBTAP00000003190	1	1	20.62	0.0555316	1.57237	3	1	unstim	PWM	SEC61B|EntrezGene|protein transport protein Sec61 subunit beta [Source:RefSeq peptide;Acc:NP_001068760]|8|ENSBTAG00000002457|ENSBTAT00000003190	62153.3	160924	60806.5	48518.5	58926	81007.3	39387.2	32082.2
ENSBTAP00000014463	5	4	147.32	0.0557532	1.81548	2;3	2	PWM	unstim	PRMT5|EntrezGene|protein arginine N-methyltransferase 5 [Source:RefSeq peptide;Acc:NP_001098844]|10|ENSBTAG00000010890|ENSBTAT00000014463	114539	93209.9	88708.6	72790.2	128001	152093	186340	203926
ENSBTAP00000020379	3	3	104.55	0.0558125	1.92625	1	1	PWM	unstim	DPP4|EntrezGene|dipeptidyl peptidase 4 [Source:RefSeq peptide;Acc:NP_776464]|2|ENSBTAG00000048246|ENSBTAT00000020379	26094.2	56099.1	43233.1	17128.4	45160.8	63861.4	109973	55601.7
ENSBTAP00000033820	3	2	98.25	0.0560855	1.23643	2;3	2	PWM	unstim	A6H6Z8_BOVIN|UniProtKB/TrEMBL|Uncharacterized protein [Source:UniProtKB/TrEMBL;Acc:F1N1F7]|3|ENSBTAG00000000113|ENSBTAT00000033917	43792.7	39868.6	46451.4	36068.2	57077.3	40006.1	61910.1	46478.1
ENSBTAP00000015713	2	2	115.85	0.0561394	3.00675	2	1	PWM	unstim	HMGCS1|HGNC Symbol|3-hydroxy-3-methylglutaryl-CoA synthase 1 (soluble) [Source:HGNC Symbol;Acc:5007]|20|ENSBTAG00000011839|ENSBTAT00000015713	24230.9	29110.2	19799.9	20901.4	24817.3	103781	84605.8	69558.1
ENSBTAP00000008082	4	3	118.13	0.0563202	1.27955	2;3	2	PWM	unstim	Q05B79_BOVIN|UniProtKB/TrEMBL|probable ATP-dependent RNA helicase DHX36 [Source:RefSeq peptide;Acc:NP_001073720]|1|ENSBTAG00000006142|ENSBTAT00000008082	19536.9	23359.3	23449.4	29730.3	20400.9	28875.1	35432.9	38225.5
ENSBTAP00000031506	10	9	458.57	0.0563378	4.89685	2;3	2	unstim	PWM	F1N529_BOVIN|UniProtKB/TrEMBL|Uncharacterized protein [Source:UniProtKB/TrEMBL;Acc:F1N529]|24|ENSBTAG00000023198|ENSBTAT00000031553	419576	1.47358e+06	1.46096e+06	1.46537e+06	411192	207484	168768	196760
ENSBTAP00000019562	10	6	551.09	0.0564324	1.48073	3	1	unstim	PWM	SMARCC2|HGNC Symbol|SWI/SNF related, matrix associated, actin dependent regulator of chromatin, subfamily c, member 2 [Source:HGNC Symbol;Acc:11105]|5|ENSBTAG00000014697|ENSBTAT00000019562	425409	312341	347745	367581	263662	300359	229644	187659
ENSBTAP00000007589	14	14	657.26	0.0564495	1.52584	2	1	unstim	PWM	A6QQ11_BOVIN|UniProtKB/TrEMBL|PGM2 proteinUncharacterized protein [Source:UniProtKB/TrEMBL;Acc:A6QQ11]|6|ENSBTAG00000005773|ENSBTAT00000007589	995665	1.80048e+06	986754	1.39026e+06	914717	876683	591618	1.00736e+06
ENSBTAP00000020371	5	5	222.16	0.0567846	3.48249	2	1	unstim	PWM	DFNA5|HGNC Symbol|deafness, autosomal dominant 5 [Source:HGNC Symbol;Acc:2810]|4|ENSBTAG00000015326|ENSBTAT00000020371	98829.5	156222	223609	135348	94026.4	20005.3	32963.3	29318
ENSBTAP00000000901	5	5	151.2	0.0568272	1.76709	2;3	2	PWM	unstim	CSDE1|EntrezGene|cold shock domain-containing protein E1 [Source:RefSeq peptide;Acc:NP_001091494]|3|ENSBTAG00000000678|ENSBTAT00000000901	41443.9	28609	30754.9	38591.7	41661.6	62399.1	63965.6	78305.3
ENSBTAP00000021868	1	1	21.4	0.0570237	12.5286	3	1	PWM	unstim	A6QR12_BOVIN|UniProtKB/TrEMBL|ATP-dependent metalloprotease YME1L1 [Source:RefSeq peptide;Acc:NP_001095320]|13|ENSBTAG00000016445|ENSBTAT00000021868	50.4345	224.184	983.964	107.098	2877.16	478.028	4952.71	8802.2
ENSBTAP00000022396	6	5	223.8	0.0571158	2.36505	3	1	PWM	unstim	SRPK1|HGNC Symbol|SRSF protein kinase 1 [Source:HGNC Symbol;Acc:11305]|23|ENSBTAG00000016838|ENSBTAT00000022396	41349.2	36003.2	19950.2	48260.2	59722.5	78950.2	112142	93448.7
ENSBTAP00000040252	5	5	144.29	0.0573265	1.20562	1;2;3	3	PWM	unstim	MAN2A1|HGNC Symbol|mannosidase, alpha, class 2A, member 1 [Source:HGNC Symbol;Acc:6824]|7|ENSBTAG00000025029|ENSBTAT00000042616	40586.3	95831.2	32922.6	21453.9	53662.1	101824	40423.3	34116
ENSBTAP00000026857	3	3	191.63	0.0574236	3.29321	3	1	PWM	unstim	BAZ1A|HGNC Symbol|bromodomain adjacent to zinc finger domain, 1A [Source:HGNC Symbol;Acc:960]|21|ENSBTAG00000020164|ENSBTAT00000026857	10528	9745.01	8532.79	10020.9	16841.2	25974.2	65189.6	19859.8
ENSBTAP00000026654	5	5	247.29	0.057448	1.46349	3	1	PWM	unstim	CDC5L_BOVIN|UniProtKB/Swiss-Prot|Cell division cycle 5-like protein [Source:UniProtKB/Swiss-Prot;Acc:Q2KJC1]|23|ENSBTAG00000020012|ENSBTAT00000026654	108261	103263	83528.8	172899	142435	191672	161148	189586
ENSBTAP00000026834	11	11	591.53	0.0574956	1.53074	2	1	PWM	unstim	DPP3|EntrezGene|dipeptidyl peptidase 3 [Source:RefSeq peptide;Acc:NP_001019684]|29|ENSBTAG00000022242|ENSBTAT00000026834	320798	351207	269135	311677	356314	462936	458456	640032
ENSBTAP00000050170	4	3	161.05	0.0575026	1.17536	2	1	unstim	PWM	A6QQT4_BOVIN|UniProtKB/TrEMBL|fatty aldehyde dehydrogenase [Source:RefSeq peptide;Acc:NP_001095454]|19|ENSBTAG00000039161|ENSBTAT00000056266	95525.5	98310.9	115264	80640.9	86067.3	93842.3	91250.8	60432.9
ENSBTAP00000047905	2	2	122.15	0.0581251	1.90629	2;3	2	PWM	unstim	A4IFU4_BOVIN|UniProtKB/TrEMBL|STAT4 proteinUncharacterized protein [Source:UniProtKB/TrEMBL;Acc:A4IFU4]|2|ENSBTAG00000046699|ENSBTAT00000056709	32396.9	28220.2	36628.4	36426	40860.6	81811	83002.3	49142.7
ENSBTAP00000020296	6	4	216.72	0.0582344	1.6929	2	1	unstim	PWM	GLB1|EntrezGene|beta-galactosidase precursor [Source:RefSeq peptide;Acc:NP_001030215]|22|ENSBTAG00000015254|ENSBTAT00000020296	117395	160339	182926	122828	116440	71076.1	93696.9	63455.7
ENSBTAP00000003922	7	7	234.75	0.0584288	1.28253	1	1	PWM	unstim	Q5EA32_BOVIN|UniProtKB/TrEMBL|transient receptor potential cation channel subfamily V member 2 [Source:RefSeq peptide;Acc:NP_001019664]|19|ENSBTAG00000003014|ENSBTAT00000003922	138696	89986.3	117965	74239	164904	99302.2	153567	122027
ENSBTAP00000020401	7	7	353.52	0.0586963	2.16933	2	1	PWM	unstim	NASP_BOVIN|UniProtKB/Swiss-Prot|Nuclear autoantigenic sperm protein [Source:UniProtKB/Swiss-Prot;Acc:Q2T9P4]|3|ENSBTAG00000015346|ENSBTAT00000020401	83036.6	114237	94414.7	95986.5	107751	182306	189175	361762
ENSBTAP00000011559;ENSBTAP00000050511	22	5	1156.75	0.0590276	1.19366	2;3	2	unstim	PWM	HNRNPM|HGNC Symbol|heterogeneous nuclear ribonucleoprotein M [Source:HGNC Symbol;Acc:5046]|7|ENSBTAG00000021039|ENSBTAT00000011559	1.50948e+06	1.89637e+06	1.57422e+06	1.84585e+06	1.35608e+06	1.64617e+06	1.41869e+06	1.29752e+06
ENSBTAP00000007404	12	12	508.74	0.0594139	1.4659	2;3	2	PWM	unstim	VARS|HGNC Symbol|valyl-tRNA synthetase [Source:HGNC Symbol;Acc:12651]|23|ENSBTAG00000005631|ENSBTAT00000007404	362206	327176	308718	367691	380721	546661	574766	499962
ENSBTAP00000020300	4	3	139.72	0.0594385	1.26962	3	1	PWM	unstim	CPSF7|HGNC Symbol|cleavage and polyadenylation specific factor 7, 59kDa [Source:HGNC Symbol;Acc:30098]|29|ENSBTAG00000015263|ENSBTAT00000020300	30130.8	59965.9	36600.1	62737.8	40221.9	80182.7	56314.2	63791.8
ENSBTAP00000024373;ENSBTAP00000002427	5	4	263.81	0.0595692	1.3904	2;3	2	PWM	unstim	PPP2R2A|HGNC Symbol|protein phosphatase 2, regulatory subunit B, alpha [Source:HGNC Symbol;Acc:9304]|8|ENSBTAG00000018317|ENSBTAT00000024373	91117.7	71157.5	111328	104407	119870	75592.1	149750	180375
ENSBTAP00000020108	10	10	339.56	0.059702	1.31316	2;3	2	PWM	unstim	PSMD6|EntrezGene|26S proteasome non-ATPase regulatory subunit 6 [Source:RefSeq peptide;Acc:NP_001029821]|22|ENSBTAG00000015112|ENSBTAT00000020108	382479	291662	347697	286098	396742	468416	440173	412200
ENSBTAP00000010022	9	9	442.35	0.0598616	2.38017	2;3	2	unstim	PWM	F1MMR6_BOVIN|UniProtKB/TrEMBL|cathepsin D [Source:RefSeq peptide;Acc:NP_001159993]|29|ENSBTAG00000007622|ENSBTAT00000010022	2.55513e+06	1.83187e+06	2.65197e+06	3.1995e+06	1.72858e+06	1.17582e+06	814767	582399
ENSBTAP00000047676	1	1	34.81	0.0599552	1.43798	3	1	PWM	unstim	DDX49|EntrezGene|probable ATP-dependent RNA helicase DDX49 [Source:RefSeq peptide;Acc:NP_001075198]|7|ENSBTAG00000000811|ENSBTAT00000056136	27236.2	53172.5	21303	30234.3	34269	63769.4	29357.8	62339.8
ENSBTAP00000027348	2	2	80.24	0.0600379	2.62793	2	1	unstim	PWM	F1MLK0_BOVIN|UniProtKB/TrEMBL|isocitrate dehydrogenase [Source:RefSeq peptide;Acc:NP_851355]|2|ENSBTAG00000020527|ENSBTAT00000027348	48773.3	55479	61372.5	62758.5	40064	23228.3	14734.3	8879.5
ENSBTAP00000023836	7	7	465.59	0.0601169	1.19979	1	1	PWM	unstim	A7YW37_BOVIN|UniProtKB/TrEMBL|CD58 proteinUncharacterized protein [Source:UniProtKB/TrEMBL;Acc:A7YW37]|3|ENSBTAG00000040131|ENSBTAT00000023836	5.98003e+06	3.38399e+06	2.86324e+06	2.32818e+06	6.04914e+06	4.43127e+06	3.62849e+06	3.35459e+06
ENSBTAP00000021570	2	2	106.95	0.0603388	2.75223	2	1	unstim	PWM	AOFA_BOVIN|UniProtKB/Swiss-Prot|Amine oxidase [flavin-containing] A [Source:UniProtKB/Swiss-Prot;Acc:P21398]|X|ENSBTAG00000016206|ENSBTAT00000021570	12422.8	27426.9	11737.8	14242.6	11237.6	4499.53	4263.23	3918.45
ENSBTAP00000015332	1	1	65.9	0.0604607	2.00903	2	1	unstim	PWM	SPG21_BOVIN|UniProtKB/Swiss-Prot|Maspardin [Source:UniProtKB/Swiss-Prot;Acc:Q8MJJ1]|10|ENSBTAG00000011540|ENSBTAT00000015332	16040.5	15500.7	10250.6	18092.5	8232.41	3171.96	5762.28	12640.9
ENSBTAP00000040493	6	5	348.07	0.0604828	1.28066	1;2;3	3	PWM	unstim	A2VDL2_BOVIN|UniProtKB/TrEMBL|solute carrier family 2, facilitated glucose transporter member 3 [Source:RefSeq peptide;Acc:NP_777028]|5|ENSBTAG00000004556|ENSBTAT00000042889	2.07238e+06	2.04907e+06	1.58582e+06	1.65653e+06	2.195e+06	2.92867e+06	2.37781e+06	1.92901e+06
ENSBTAP00000003145	10	9	558.97	0.0606748	1.29642	2;3	2	PWM	unstim	PSD12_BOVIN|UniProtKB/Swiss-Prot|26S proteasome non-ATPase regulatory subunit 12 [Source:UniProtKB/Swiss-Prot;Acc:Q2KJ25]|19|ENSBTAG00000002423|ENSBTAT00000003145	613639	588776	552288	541237	618339	770440	778537	809183
ENSBTAP00000027260	2	2	79.05	0.060714	1.51861	2	1	unstim	PWM	Q1JPB7_BOVIN|UniProtKB/TrEMBL|1-acyl-sn-glycerol-3-phosphate acyltransferase gamma [Source:RefSeq peptide;Acc:NP_001033135]|1|ENSBTAG00000020456|ENSBTAT00000027260	29327	35641.4	35066.1	41698.6	28937.1	20793.8	22334.8	21265
ENSBTAP00000016514	9	2	550.47	0.0608751	1.20669	2;3	2	unstim	PWM	PPP1CB|EntrezGene|serine/threonine-protein phosphatase PP1-beta catalytic subunit [Source:RefSeq peptide;Acc:NP_001029825]|11|ENSBTAG00000012447|ENSBTAT00000016514	73491.5	94924.2	81812.3	75206.4	67833.1	72636.4	75421.2	53802
ENSBTAP00000000799	3	2	108.51	0.0608939	2.09189	2;3	2	PWM	unstim	ABCF2_BOVIN|UniProtKB/Swiss-Prot|ATP-binding cassette sub-family F member 2 [Source:UniProtKB/Swiss-Prot;Acc:Q2KJA2]|4|ENSBTAG00000000607|ENSBTAT00000000799	27208.6	23594.3	22294.3	37532.1	30577.6	78840	58035	63971.3
ENSBTAP00000027359	4	4	133.34	0.0609499	2.74644	2;3	2	unstim	PWM	PYCARD|EntrezGene|apoptosis-associated speck-like protein containing a CARD [Source:RefSeq peptide;Acc:NP_777155]|25|ENSBTAG00000020535|ENSBTAT00000027359	34599.3	83080.2	67279.2	76891.1	33935.2	21172.4	23435	16798.9
ENSBTAP00000019296	1	1	44.81	0.0621234	2.04578	3	1	PWM	unstim	RFC1|HGNC Symbol|replication factor C (activator 1) 1, 145kDa [Source:HGNC Symbol;Acc:9969]|6|ENSBTAG00000014515|ENSBTAT00000019296	2483.52	540.607	3773.34	1578.77	2486.82	1620.91	8462.01	4566.18
ENSBTAP00000002967	2	2	75.35	0.0623456	1.06248	1	1	unstim	PWM	Q32PA1_BOVIN|UniProtKB/TrEMBL|CD59 molecule, complement regulatory protein [Source:RefSeq peptide;Acc:NP_001032523]|15|ENSBTAG00000002302|ENSBTAT00000002967	446611	153819	130402	124217	410983	144978	125416	123390
ENSBTAP00000020021	1	1	26.01	0.0626038	8.02206	3	1	PWM	unstim	WDR55_BOVIN|UniProtKB/Swiss-Prot|WD repeat-containing protein 55 [Source:UniProtKB/Swiss-Prot;Acc:Q58DT8]|7|ENSBTAG00000015042|ENSBTAT00000020021	451.854	0	1315.62	334.387	3215.7	361.391	6739.34	6544.81
ENSBTAP00000012432	3	3	113.93	0.062631	1.15792	3	1	PWM	unstim	UBP10_BOVIN|UniProtKB/Swiss-Prot|Ubiquitin carboxyl-terminal hydrolase 10 [Source:UniProtKB/Swiss-Prot;Acc:A5PJS6]|18|ENSBTAG00000009446|ENSBTAT00000012432	29351.7	38959.2	25836.4	43957.7	30154.3	46156.3	33924	49680.2
ENSBTAP00000000103	2	2	77.89	0.0626709	1.705	1	1	PWM	unstim	PDCD1LG2|HGNC Symbol|programmed cell death 1 ligand 2 [Source:HGNC Symbol;Acc:18731]|8|ENSBTAG00000033316|ENSBTAT00000000103	15755.8	43275.7	21091	13967	50276.2	53474	32642.6	24029.6
ENSBTAP00000026867	11	11	377.24	0.062765	1.55746	2;3	2	unstim	PWM	INPP5D|EntrezGene|phosphatidylinositol-3,4,5-trisphosphate 5-phosphatase 1 [Source:RefSeq peptide;Acc:NP_001095352]|3|ENSBTAG00000020173|ENSBTAT00000026867	634030	431235	407479	452625	302233	219509	361629	352851
ENSBTAP00000020096	5	4	188.82	0.0628997	1.64708	3	1	unstim	PWM	HMGB2_BOVIN|UniProtKB/Swiss-Prot|High mobility group protein B2 [Source:UniProtKB/Swiss-Prot;Acc:P40673]|8|ENSBTAG00000015101|ENSBTAT00000020096	570972	804251	441310	464729	440432	606987	190742	146870
ENSBTAP00000009864	7	2	442.57	0.0629379	1.40196	2;3	2	unstim	PWM	A5D9B4_BOVIN|UniProtKB/TrEMBL|heterogeneous nuclear ribonucleoprotein H2 [Source:RefSeq peptide;Acc:NP_001069476]|X|ENSBTAG00000007499|ENSBTAT00000009864	86693.4	109678	109630	120042	72912.5	97150.2	69452.6	64376
ENSBTAP00000025044	1	1	35.28	0.0630857	1.67004	2	1	PWM	unstim	IDH3B_BOVIN|UniProtKB/Swiss-Prot|Isocitrate dehydrogenase [NAD] subunit beta, mitochondrial [Source:UniProtKB/Swiss-Prot;Acc:O77784]|13|ENSBTAG00000018813|ENSBTAT00000025044	7281.12	12676.9	14143.8	10793	13517.1	29283.3	20593	11582.8
ENSBTAP00000040952	4	4	159.71	0.0630981	2.95006	3	1	PWM	unstim	Q148H9_BOVIN|UniProtKB/TrEMBL|ribosomal RNA processing protein 1 homolog A [Source:RefSeq peptide;Acc:NP_001069057]|1|ENSBTAG00000003981|ENSBTAT00000043376	27368.9	25050.2	22378.3	28346	35550.2	70396.1	140698	57635.4
ENSBTAP00000001303	4	3	204.28	0.0633525	1.32379	2	1	unstim	PWM	A6QLS9_BOVIN|UniProtKB/TrEMBL|ras-related protein Rab-10 [Source:RefSeq peptide;Acc:NP_001094758]|11|ENSBTAG00000000985|ENSBTAT00000001303	471643	390440	460825	442161	383420	373951	289396	286581
ENSBTAP00000026577	1	1	37.77	0.0633683	1.34539	2	1	unstim	PWM	PCYXL_BOVIN|UniProtKB/Swiss-Prot|Prenylcysteine oxidase-like [Source:UniProtKB/Swiss-Prot;Acc:Q0P5H1]|7|ENSBTAG00000019951|ENSBTAT00000026577	11118.7	13405.6	8350.4	9402.05	7773.1	8060.77	6502.66	9086.96
ENSBTAP00000018840	4	4	174.02	0.063385	1.30051	2;3	2	PWM	unstim	STRAP_BOVIN|UniProtKB/Swiss-Prot|Serine-threonine kinase receptor-associated protein [Source:UniProtKB/Swiss-Prot;Acc:Q5E959]|5|ENSBTAG00000014175|ENSBTAT00000018840	41299.9	50370.3	47389.6	55148.4	50956.4	83199.5	53347.2	65066.6
ENSBTAP00000041740	6	6	312.07	0.0634237	1.76586	3	1	unstim	PWM	SUPT5H|EntrezGene|transcription elongation factor SPT5 [Source:RefSeq peptide;Acc:NP_001076908]|18|ENSBTAG00000010467|ENSBTAT00000044229	345040	316172	194089	290773	155144	167319	196234	130322
ENSBTAP00000001294	1	1	66.01	0.0634254	1.98005	3	1	PWM	unstim	ASH2L|HGNC Symbol|ash2 (absent, small, or homeotic)-like (Drosophila) [Source:HGNC Symbol;Acc:744]|27|ENSBTAG00000000978|ENSBTAT00000001294	7867.87	1563.36	21671.8	7588.59	18328.1	10811.8	28745.7	18725.8
ENSBTAP00000037175;ENSBTAP00000054211	3	3	149	0.0634427	2.44536	2	1	unstim	PWM	APOBR|HGNC Symbol|apolipoprotein B receptor [Source:HGNC Symbol;Acc:24087]|25|ENSBTAG00000018011|ENSBTAT00000037341	21628.7	62170.2	35736.6	40429.7	22230.1	17664.3	11925.3	13595.9
ENSBTAP00000026548	3	3	76.94	0.0635914	1.72664	2	1	unstim	PWM	CYB5R1|EntrezGene|NADH-cytochrome b5 reductase 1 [Source:RefSeq peptide;Acc:NP_001029690]|16|ENSBTAG00000019927|ENSBTAT00000026548	34484.2	65378.2	52456.2	38281.5	27691.8	26186.5	25384.8	31125.1
ENSBTAP00000004925	1	1	20.26	0.0636194	2.42848	3	1	PWM	unstim	DNJC2_BOVIN|UniProtKB/Swiss-Prot|DnaJ homolog subfamily C member 2 [Source:UniProtKB/Swiss-Prot;Acc:Q1RMH9]|4|ENSBTAG00000003784|ENSBTAT00000004925	2392.6	2659.28	2438.47	5468.53	4042.64	14105.9	5565.71	7756.2
ENSBTAP00000053924	4	4	155.72	0.0636475	1.572	3	1	PWM	unstim	EXOS2_BOVIN|UniProtKB/Swiss-Prot|Exosome complex component RRP4 [Source:UniProtKB/Swiss-Prot;Acc:Q2KID0]|11|ENSBTAG00000048071|ENSBTAT00000063775	27440.9	18533.5	40225.4	28337.5	30807.9	26047.1	59713.5	63484
ENSBTAP00000035551	8	3	279.57	0.0636817	2.12992	3	1	unstim	PWM	A5PKK5_BOVIN|UniProtKB/TrEMBL|probable global transcription activator SNF2L2 [Source:RefSeq peptide;Acc:NP_001092585]|8|ENSBTAG00000007494|ENSBTAT00000035681	129272	146080	93883.7	108163	60901.8	53659.9	85264.5	24313.6
ENSBTAP00000014556	3	3	101.13	0.0639348	1.46097	2;3	2	unstim	PWM	IL16_BOVIN|UniProtKB/Swiss-Prot|Pro-interleukin-16Interleukin-16 [Source:UniProtKB/Swiss-Prot;Acc:Q0V8R5]|21|ENSBTAG00000010963|ENSBTAT00000014556	78378.8	69024.1	88405.8	72851.4	49060.5	31808.2	63189.6	67213
ENSBTAP00000010530	1	1	28.38	0.0640517	3.28094	1	1	unstim	PWM	F1N720_BOVIN|UniProtKB/TrEMBL|toll-like receptor 2 precursor [Source:RefSeq peptide;Acc:NP_776622]|17|ENSBTAG00000008008|ENSBTAT00000010530	7337.04	12608.5	16717.7	9174.85	3423.43	8059.36	1748.53	739.733
ENSBTAP00000012125	3	3	115.47	0.0643142	1.26382	2;3	2	PWM	unstim	RANGAP1|EntrezGene|chondroadherin-like [Source:RefSeq peptide;Acc:NP_001103559]|5|ENSBTAG00000012481|ENSBTAT00000012125	34424.1	51273.3	64715.2	45653.6	39658.8	64390.5	71353	72390.7
ENSBTAP00000020150	2	2	60.07	0.0643659	2.09492	3	1	unstim	PWM	S10AA_BOVIN|UniProtKB/Swiss-Prot|Protein S100-A10 [Source:UniProtKB/Swiss-Prot;Acc:P60902]|3|ENSBTAG00000015147|ENSBTAT00000020150	510746	739120	660166	311867	477226	292433	154142	136812
ENSBTAP00000001646;ENSBTAP00000019264	19	10	982.07	0.0644654	1.15945	1;2;3	3	PWM	unstim	ATP1A1|EntrezGene|sodium/potassium-transporting ATPase subunit alpha-1 precursor [Source:RefSeq peptide;Acc:NP_001070266]|3|ENSBTAG00000001246|ENSBTAT00000001646	781896	816023	713878	605442	805201	1.06938e+06	818715	689097
ENSBTAP00000019422	10	10	380.16	0.0645445	1.48582	3	1	PWM	unstim	RL1D1_BOVIN|UniProtKB/Swiss-Prot|Ribosomal L1 domain-containing protein 1 [Source:UniProtKB/Swiss-Prot;Acc:A4FV97]|25|ENSBTAG00000014588|ENSBTAT00000019422	389975	526825	320989	460008	490819	602587	686795	742426
ENSBTAP00000012348	1	1	50.11	0.0646297	2.08231	2	1	unstim	PWM	Q17QI4_BOVIN|UniProtKB/TrEMBL|type-1 angiotensin II receptor-associated protein [Source:RefSeq peptide;Acc:NP_001068831]|16|ENSBTAG00000009384|ENSBTAT00000012348	32184.3	59873.9	46489.4	54716.7	33221.1	22541.8	18268.6	18781.3
ENSBTAP00000022949	3	2	100.37	0.0647198	1.43141	1;2	2	PWM	unstim	COX5A_BOVIN|UniProtKB/Swiss-Prot|Cytochrome c oxidase subunit 5A, mitochondrial [Source:UniProtKB/Swiss-Prot;Acc:P00426]|21|ENSBTAG00000017267|ENSBTAT00000022949	128033	309794	130022	95552.5	234320	453434	155010	106835
ENSBTAP00000006069	11	9	407.69	0.0652203	1.20354	2	1	unstim	PWM	PYGB|EntrezGene|glycogen phosphorylase, brain form [Source:RefSeq peptide;Acc:NP_001030347]|13|ENSBTAG00000004625|ENSBTAT00000006069	481815	367111	535083	372149	413022	343798	376093	326244
ENSBTAP00000013121	6	5	171.27	0.0652527	1.20365	3	1	unstim	PWM	A6QLA8_BOVIN|UniProtKB/TrEMBL|E3 ubiquitin/ISG15 ligase TRIM25 [Source:RefSeq peptide;Acc:NP_001093806]|19|ENSBTAG00000009948|ENSBTAT00000013121	119542	111906	107951	113618	111259	87940.3	98065.2	79104
ENSBTAP00000022386	10	10	531.21	0.0652606	1.11293	1;2;3	3	PWM	unstim	Q2NL04_BOVIN|UniProtKB/TrEMBL|tapasin [Source:RefSeq peptide;Acc:NP_001039350]|23|ENSBTAG00000016828|ENSBTAT00000022386	3.30205e+06	3.24742e+06	1.89593e+06	2.56863e+06	3.66804e+06	3.52192e+06	2.38536e+06	2.68251e+06
ENSBTAP00000040254	9	8	421.79	0.0652836	1.29506	2;3	2	unstim	PWM	CYB5R3|EntrezGene|NADH-cytochrome b5 reductase 3 [Source:RefSeq peptide;Acc:NP_001096720]|5|ENSBTAG00000016516|ENSBTAT00000042618	1.02746e+06	1.27373e+06	1.16639e+06	992597	995138	1.03653e+06	745379	666943
ENSBTAP00000014526	8	7	203.98	0.0656166	1.34256	2;3	2	unstim	PWM	EML4|HGNC Symbol|echinoderm microtubule associated protein like 4 [Source:HGNC Symbol;Acc:1316]|11|ENSBTAG00000010935|ENSBTAT00000014526	410570	365458	298046	402912	327345	229138	288748	254897
ENSBTAP00000010802	1	1	76.82	0.0662042	9.21197	2	1	PWM	unstim	RRM2|HGNC Symbol|ribonucleotide reductase M2 [Source:HGNC Symbol;Acc:10452]|11|ENSBTAG00000008216|ENSBTAT00000010802	3695.52	218.51	92.7427	203.724	8152.65	915.235	6771.43	22947.7
ENSBTAP00000015173	3	3	163.22	0.066252	1.45785	1	1	unstim	PWM	CD37_BOVIN|UniProtKB/Swiss-Prot|Leukocyte antigen CD37 [Source:UniProtKB/Swiss-Prot;Acc:Q2KHY8]|18|ENSBTAG00000011421|ENSBTAT00000015173	853560	1.09644e+06	670974	320618	456048	1.05067e+06	295930	215113
ENSBTAP00000008424	14	13	566.89	0.0663075	1.2204	2;3	2	unstim	PWM	TRIM28|HGNC Symbol|tripartite motif containing 28 [Source:HGNC Symbol;Acc:16384]|18|ENSBTAG00000006422|ENSBTAT00000008424	657323	612368	743474	528312	444113	484343	729190	424854
ENSBTAP00000045494	1	1	32.59	0.0663264	1.15315	1	1	unstim	PWM	A8DC37_BOVIN|UniProtKB/TrEMBL|Fc fragment of IgG, low affinity IIc, receptor for (CD32) [Source:RefSeq peptide;Acc:NP_001103276]|3|ENSBTAG00000038124|ENSBTAT00000048465	101273	106254	39556.5	79551	87088.3	105238	31003.9	59925.7
ENSBTAP00000011270	1	1	25.63	0.066352	3.14602	3	1	PWM	unstim	FAM98A|EntrezGene|hypothetical protein LOC530070 [Source:RefSeq peptide;Acc:NP_001076924]|11|ENSBTAG00000008548|ENSBTAT00000011270	3334.57	2066.67	2986.32	2523.78	3236.8	8592.73	14530.8	7966.88
ENSBTAP00000021260	42	42	2330.1	0.0664941	3.2573	1;2;3	3	PWM	unstim	FASN|EntrezGene|fatty acid synthase [Source:RefSeq peptide;Acc:NP_001012687]|19|ENSBTAG00000015980|ENSBTAT00000021260	1.39106e+06	746316	808157	914158	1.30499e+06	3.77423e+06	3.69475e+06	3.7982e+06
ENSBTAP00000011607	1	1	24.52	0.0665035	1.84314	3	1	PWM	unstim	WDR89_BOVIN|UniProtKB/Swiss-Prot|WD repeat-containing protein 89 [Source:UniProtKB/Swiss-Prot;Acc:Q3ZBK1]|10|ENSBTAG00000008815|ENSBTAT00000011607	3831.34	1464.21	7904.11	3734.4	5432.82	5414.95	10066.6	10297.5
ENSBTAP00000027807	2	2	82.79	0.0665098	3.79853	1;2	2	unstim	PWM	Q673L2_BOVIN|UniProtKB/TrEMBL|C5a anaphylatoxin chemotactic receptor [Source:RefSeq peptide;Acc:NP_001007811]|18|ENSBTAG00000020872|ENSBTAT00000027807	39661.4	115820	159822	123759	25981.9	59326.3	18066.5	12212.9
ENSBTAP00000001355	1	1	36.65	0.0668079	2.17142	2	1	unstim	PWM	NAGA_BOVIN|UniProtKB/Swiss-Prot|Putative N-acetylglucosamine-6-phosphate deacetylase [Source:UniProtKB/Swiss-Prot;Acc:A7MBC0]|25|ENSBTAG00000001022|ENSBTAT00000001355	7846.93	3623.43	4608.49	8299.14	3956.7	3456.12	1255.71	2558.21
ENSBTAP00000026053	2	1	43.31	0.0669308	1.30268	2	1	unstim	PWM	PGRMC1|EntrezGene|membrane-associated progesterone receptor component 1 [Source:RefSeq peptide;Acc:NP_001068601]|X|ENSBTAG00000019552|ENSBTAT00000026053	16303.1	18187.3	13881.1	22711.5	10708.3	10960.4	11896	21002.1
ENSBTAP00000008496	4	3	102.14	0.0669539	1.99396	3	1	PWM	unstim	E1BIX2_BOVIN|UniProtKB/TrEMBL|DNA-directed RNA polymerase [Source:UniProtKB/TrEMBL;Acc:E1BIX2]|11|ENSBTAG00000006481|ENSBTAT00000008496	14615.1	2462.17	16001.3	12623.8	15359.4	7993.46	44860.1	22915.6
ENSBTAP00000036015	3	3	86.3	0.0669991	1.22957	2;3	2	unstim	PWM	A5PK34_BOVIN|UniProtKB/TrEMBL|differentially expressed in FDCP 6 homolog [Source:RefSeq peptide;Acc:NP_001092464]|23|ENSBTAG00000025622|ENSBTAT00000036152	59960	50441.1	63773	60946.9	47993.5	45884.4	57245.2	40099.1
ENSBTAP00000015861	3	3	122.77	0.0670227	1.63077	3	1	PWM	unstim	MRT4_BOVIN|UniProtKB/Swiss-Prot|mRNA turnover protein 4 homolog [Source:UniProtKB/Swiss-Prot;Acc:A4FV84]|2|ENSBTAG00000011951|ENSBTAT00000015861	84445.2	123294	49295.9	104887	108968	183214	145263	152767
ENSBTAP00000013650	4	4	227.96	0.0671118	1.82301	2	1	unstim	PWM	Q58DR3_BOVIN|UniProtKB/TrEMBL|transaldolase [Source:RefSeq peptide;Acc:NP_001030360]|29|ENSBTAG00000010336|ENSBTAT00000013650	531717	856930	815647	940857	533694	468862	353771	368929
ENSBTAP00000018484	5	5	233.15	0.0671192	1.19306	1;2	2	PWM	unstim	BoLA-DRB3|EntrezGene|major histocompatibility complex, class II, DRB3 [Source:RefSeq peptide;Acc:NP_001012698]|23|ENSBTAG00000013919|ENSBTAT00000018484	617137	3.82103e+06	764516	1.38159e+06	806788	4.22452e+06	817912	2.00621e+06
ENSBTAP00000023619	18	16	858.71	0.0671883	1.52311	3	1	unstim	PWM	SMC1A_BOVIN|UniProtKB/Swiss-Prot|Structural maintenance of chromosomes protein 1A [Source:UniProtKB/Swiss-Prot;Acc:O97593]|X|ENSBTAG00000017761|ENSBTAT00000023619	878841	735351	679862	806679	475526	528716	647042	384512
ENSBTAP00000018042	2	2	80.05	0.067322	2.0536	1;2	2	PWM	unstim	Q9TTF5_BOVIN|UniProtKB/TrEMBL|CD38 antigen [Source:RefSeq peptide;Acc:NP_786992]|6|ENSBTAG00000013569|ENSBTAT00000018042	8890.59	10282	7337.12	14049.2	35198.6	15548.8	12714.7	19829.5
ENSBTAP00000021529;ENSBTAP00000038315	10	10	595.97	0.0675062	2.12594	2;3	2	PWM	unstim	||Uncharacterized protein [Source:UniProtKB/TrEMBL;Acc:E1B8K6]|2|ENSBTAG00000016174|ENSBTAT00000021529	1.15541e+06	2.6772e+06	1.21184e+06	1.93668e+06	1.73729e+06	7.31607e+06	1.32126e+06	4.46683e+06
ENSBTAP00000015828	69	65	3147.82	0.0675339	1.48863	2;3	2	unstim	PWM	PLEC|HGNC Symbol|plectin [Source:HGNC Symbol;Acc:9069]|14|ENSBTAG00000011922|ENSBTAT00000015828	3.16727e+06	3.22879e+06	3.36176e+06	2.24663e+06	2.12068e+06	1.41935e+06	3.20731e+06	1.31675e+06
ENSBTAP00000015863	3	3	69.17	0.0678691	1.28153	2	1	unstim	PWM	KAPCB_BOVIN|UniProtKB/Swiss-Prot|cAMP-dependent protein kinase catalytic subunit beta [Source:UniProtKB/Swiss-Prot;Acc:P05131]|3|ENSBTAG00000011953|ENSBTAT00000015863	56933.1	48463.8	61115	47269.8	36375.6	47796.8	46167.9	36476.9
ENSBTAP00000019998	2	2	68.82	0.0679597	1.75687	3	1	unstim	PWM	KIF2A|EntrezGene|kinesin-like protein KIF2A [Source:RefSeq peptide;Acc:NP_001070541]|20|ENSBTAG00000015022|ENSBTAT00000019998	24717.5	27850.1	15419.7	20536.9	11411.3	14009.1	15962.1	9004.9
ENSBTAP00000030898;ENSBTAP00000049717	5	5	167.72	0.0681997	1.58147	2	1	unstim	PWM	GLPK_BOVIN|UniProtKB/Swiss-Prot|Glycerol kinase [Source:UniProtKB/Swiss-Prot;Acc:Q0IID9]|X|ENSBTAG00000008124|ENSBTAT00000030932	97823.6	122314	118306	117577	98628.6	74897.5	56092.1	58734.2
ENSBTAP00000027379	2	2	57.51	0.0683642	1.27754	2;3	2	unstim	PWM	Q5E9F1_BOVIN|UniProtKB/TrEMBL|B-cell receptor-associated protein 31 [Source:RefSeq peptide;Acc:NP_001014941]|X|ENSBTAG00000020547|ENSBTAT00000027379	208707	286553	225147	202475	200126	218258	179950	124053
ENSBTAP00000020818	11	11	325.83	0.0684078	1.37904	2;3	2	PWM	unstim	F1MMK8_BOVIN|UniProtKB/TrEMBL|lysyl-tRNA synthetase [Source:RefSeq peptide;Acc:NP_001029528]|18|ENSBTAG00000015677|ENSBTAT00000020818	401151	452803	320812	414710	424954	602450	593760	570793
ENSBTAP00000028094	6	6	173.71	0.0685516	1.17964	1	1	PWM	unstim	F1MY01_BOVIN|UniProtKB/TrEMBL|multidrug resistance-associated protein 1 [Source:RefSeq peptide;Acc:NP_776648]|25|ENSBTAG00000021090|ENSBTAT00000028094	105931	96713.6	108294	46134.1	115060	121402	117911	66845.7
ENSBTAP00000042894	1	1	55.78	0.0686927	1.97559	1	1	PWM	unstim	FCER2|HGNC Symbol|Fc fragment of IgE, low affinity II, receptor for (CD23) [Source:HGNC Symbol;Acc:3612]|7|ENSBTAG00000004270|ENSBTAT00000045513	12122.9	13158.6	6317.39	3341.17	14288	38413.2	8640.18	7685.9
ENSBTAP00000023671	8	7	404.12	0.0691603	1.59244	2;3	2	unstim	PWM	Q3ZBG1_BOVIN|UniProtKB/TrEMBL|ras-related protein Rab-14 [Source:RefSeq peptide;Acc:NP_001124226]|8|ENSBTAG00000017803|ENSBTAT00000023671	1.34621e+06	804983	912755	722058	565108	742941	591221	478225
ENSBTAP00000018777	5	2	298.53	0.0693147	1.32665	2;3	2	unstim	PWM	F1MNI4_BOVIN|UniProtKB/TrEMBL|Uncharacterized protein [Source:UniProtKB/TrEMBL;Acc:F1MNI4]|5|ENSBTAG00000014129|ENSBTAT00000018777	122476	163405	149699	159486	116678	95621.2	108618	127631
ENSBTAP00000039580	3	3	182.6	0.069722	1.53353	2;3	2	unstim	PWM	CISD2_BOVIN|UniProtKB/Swiss-Prot|CDGSH iron-sulfur domain-containing protein 2 [Source:UniProtKB/Swiss-Prot;Acc:Q05B71]|6|ENSBTAG00000027630|ENSBTAT00000039792	203213	467457	236509	166021	208452	255917	131711	103742
ENSBTAP00000016378	3	3	172.04	0.0698005	2.67937	2;3	2	PWM	unstim	RL26_BOVIN|UniProtKB/Swiss-Prot|60S ribosomal protein L26 [Source:UniProtKB/Swiss-Prot;Acc:P61257]|19|ENSBTAG00000012344|ENSBTAT00000016378	59452.4	5251.79	32624.1	84732.4	113975	82699.4	103579	187555
ENSBTAP00000013018	4	4	193.12	0.0699052	1.28461	2	1	PWM	unstim	RAB18_BOVIN|UniProtKB/Swiss-Prot|Ras-related protein Rab-18 [Source:UniProtKB/Swiss-Prot;Acc:Q0IIG8]|13|ENSBTAG00000009871|ENSBTAT00000013018	327816	378178	309765	328112	331499	509566	386018	499271
ENSBTAP00000019939	4	4	108.78	0.0701619	1.4017	1	1	PWM	unstim	A6H6Y1_BOVIN|UniProtKB/TrEMBL|BOLA-DQA1 proteinUncharacterized protein [Source:UniProtKB/TrEMBL;Acc:A6H6Y1]|23|ENSBTAG00000037605|ENSBTAT00000019939	78781.3	61337.5	131080	545169	123254	61882	165781	793386
ENSBTAP00000006030	27	19	1259.21	0.0701709	1.54926	3	1	unstim	PWM	F1MU48_BOVIN|UniProtKB/TrEMBL|DNA topoisomerase 2 [Source:UniProtKB/TrEMBL;Acc:F1MU48]|27|ENSBTAG00000004593|ENSBTAT00000006030	1.20773e+06	1.08137e+06	1.09261e+06	1.10673e+06	724393	501774	1.11188e+06	559099
ENSBTAP00000033805;ENSBTAP00000024127;ENSBTAP00000028441	6	6	263.19	0.0702576	1.50367	2;3	2	PWM	unstim	F1N1G7_BOVIN|UniProtKB/TrEMBL|Uncharacterized protein [Source:UniProtKB/TrEMBL;Acc:F1N1G7]|13|ENSBTAG00000002280|ENSBTAT00000033899	159256	178500	157040	179758	168438	238292	245883	361694
ENSBTAP00000008225	29	20	1523.76	0.070268	1.34292	1;2;3	3	PWM	unstim	HS90A_BOVIN|UniProtKB/Swiss-Prot|Heat shock protein HSP 90-alpha [Source:UniProtKB/Swiss-Prot;Acc:Q76LV2]|21|ENSBTAG00000006270|ENSBTAT00000008225	7.28214e+06	7.78144e+06	7.31368e+06	7.52706e+06	7.39305e+06	1.19884e+07	9.14434e+06	1.16332e+07
ENSBTAP00000026449;ENSBTAP00000027023	13	13	688.84	0.0702694	1.10886	1;2;3	3	PWM	unstim	A5D973_BOVIN|UniProtKB/TrEMBL|serine/threonine-protein phosphatase 2A 65 kDa regulatory subunit A alpha isoform [Source:RefSeq peptide;Acc:NP_001032554]|18|ENSBTAG00000019851|ENSBTAT00000026449	1.44698e+06	1.51939e+06	1.59857e+06	1.39542e+06	1.58493e+06	1.79781e+06	1.60263e+06	1.62383e+06
ENSBTAP00000019767	10	9	293.05	0.0705804	1.24742	2;3	2	unstim	PWM	COPB2|EntrezGene|coatomer subunit beta' [Source:RefSeq peptide;Acc:NP_776706]|1|ENSBTAG00000014843|ENSBTAT00000019767	518712	491294	495677	421281	326104	451884	418227	348548
ENSBTAP00000028556	3	3	173.09	0.0706189	1.27933	2;3	2	PWM	unstim	SSRD_BOVIN|UniProtKB/Swiss-Prot|Translocon-associated protein subunit delta [Source:UniProtKB/Swiss-Prot;Acc:Q2TBX5]|X|ENSBTAG00000021421|ENSBTAT00000028556	377002	516217	406936	408953	501843	514283	624323	546056
ENSBTAP00000010451	21	20	1025.34	0.0706384	1.66226	2;3	2	unstim	PWM	MVP|EntrezGene|major vault protein [Source:RefSeq peptide;Acc:NP_001030394]|25|ENSBTAG00000007952|ENSBTAT00000010451	1.70498e+06	1.77593e+06	1.36749e+06	1.8917e+06	1.58106e+06	942318	864987	666417
ENSBTAP00000020681	1	1	53.04	0.0711679	1.93043	2;3	2	PWM	unstim	TIMM44|HGNC Symbol|translocase of inner mitochondrial membrane 44 homolog (yeast) [Source:HGNC Symbol;Acc:17316]|7|ENSBTAG00000015567|ENSBTAT00000020681	27789.1	13763.5	10505.3	14396.4	46764.6	16965.3	39560.8	24994.8
ENSBTAP00000055447	1	1	65.2	0.0715219	1.36843	1	1	PWM	unstim	|||16|ENSBTAG00000047621|ENSBTAT00000064703	9032.36	20343	5685.24	4212.58	10675.2	23434.1	11602.2	8031.22
ENSBTAP00000019596	10	3	637.86	0.0722968	1.33049	2;3	2	unstim	PWM	IF4A2_BOVIN|UniProtKB/Swiss-Prot|Eukaryotic initiation factor 4A-II [Source:UniProtKB/Swiss-Prot;Acc:Q3SZ65]|1|ENSBTAG00000014724|ENSBTAT00000019596	188402	234037	293588	229802	177447	196120	173687	163633
ENSBTAP00000046244	1	1	62.56	0.0725573	1.27543	2;3	2	unstim	PWM	TIFA_BOVIN|UniProtKB/Swiss-Prot|TRAF-interacting protein with FHA domain-containing protein A [Source:UniProtKB/Swiss-Prot;Acc:A2VDM0]|6|ENSBTAG00000027655|ENSBTAT00000039829	38690.1	51071.8	43184.1	39728.4	28537.1	51471.8	26921.3	28454.7
ENSBTAP00000046146	8	7	293.05	0.0729083	1.44528	2;3	2	PWM	unstim	EIF3F|HGNC Symbol|eukaryotic translation initiation factor 3, subunit F [Source:HGNC Symbol;Acc:3275]|15|ENSBTAG00000004861|ENSBTAT00000049219	225243	293276	315905	225725	325582	440698	321477	444456
ENSBTAP00000000906	2	2	44.05	0.0730097	1.67759	3	1	unstim	PWM	WDR37|HGNC Symbol|WD repeat domain 37 [Source:HGNC Symbol;Acc:31406]|13|ENSBTAG00000000683|ENSBTAT00000000906	12175.9	9985.24	6617.08	10871.2	5564.36	7788.67	5802.46	4479.31
ENSBTAP00000014594	1	1	31.16	0.0732607	1.59651	2	1	unstim	PWM	P85A_BOVIN|UniProtKB/Swiss-Prot|Phosphatidylinositol 3-kinase regulatory subunit alpha [Source:UniProtKB/Swiss-Prot;Acc:P23727]|20|ENSBTAG00000010989|ENSBTAT00000014594	2465.95	2707.38	3307.21	3943.87	2537.25	1205.2	1853.02	2186.75
ENSBTAP00000018632	3	3	104.5	0.0734374	1.49449	3	1	unstim	PWM	IKZF1|EntrezGene|DNA-binding protein Ikaros [Source:RefSeq peptide;Acc:NP_001098727]|4|ENSBTAG00000014016|ENSBTAT00000018632	122344	125412	110197	92201.7	55826.2	104812	94800	45772.7
ENSBTAP00000014279	1	1	45.4	0.0736992	1.57386	2;3	2	unstim	PWM	PPM1E|HGNC Symbol|protein phosphatase, Mg2+/Mn2+ dependent, 1E [Source:HGNC Symbol;Acc:19322]|19|ENSBTAG00000010788|ENSBTAT00000014279	3.07683e+06	4.00242e+06	3.25524e+06	2.23313e+06	2.96837e+06	2.67772e+06	1.41647e+06	922675
ENSBTAP00000017242	1	1	21.15	0.0739526	4.88795	3	1	PWM	unstim	A3KMY2_BOVIN|UniProtKB/TrEMBL|dickkopf-related protein 2 [Source:RefSeq peptide;Acc:NP_001076084]|6|ENSBTAG00000012969|ENSBTAT00000017242	6542.22	6739.6	19895.3	10361	21920	7046.79	83235.1	100610
ENSBTAP00000041827	1	1	40.94	0.0741765	2.42326	3	1	PWM	unstim	A5PKD1_BOVIN|UniProtKB/TrEMBL|nucleolar protein 14 [Source:RefSeq peptide;Acc:NP_001092466]|6|ENSBTAG00000001504|ENSBTAT00000044320	10330.8	3131.7	9573.39	12407	14740.2	22005.4	28680.4	20461.4
ENSBTAP00000010988	1	1	20.43	0.0743558	1.69119	2	1	unstim	PWM	A6QLZ3_BOVIN|UniProtKB/TrEMBL|arylsulfatase B [Source:RefSeq peptide;Acc:NP_001094645]|10|ENSBTAG00000008341|ENSBTAT00000010988	20529.4	16854.2	19563.6	18204.6	19223.1	10991.4	8037.19	6185.49
ENSBTAP00000021132	1	1	27.84	0.0744178	1.50542	1	1	PWM	unstim	CNPY3|EntrezGene|protein canopy homolog 3 precursor [Source:RefSeq peptide;Acc:NP_001068907]|23|ENSBTAG00000015900|ENSBTAT00000021132	3663.26	7646.96	2760.95	1423.77	6370.3	8855.39	3947.46	4153.21
ENSBTAP00000019719	31	31	1957.57	0.0749139	1.39437	1;2;3	3	unstim	PWM	ANXA6_BOVIN|UniProtKB/Swiss-Prot|Annexin A6 [Source:UniProtKB/Swiss-Prot;Acc:P79134]|7|ENSBTAG00000014809|ENSBTAT00000019719	2.39378e+07	3.19249e+07	1.58052e+07	1.78478e+07	1.73549e+07	1.77618e+07	1.50709e+07	1.40102e+07
ENSBTAP00000003058	5	5	112.01	0.0751674	1.72318	3	1	PWM	unstim	DDX47_BOVIN|UniProtKB/Swiss-Prot|Probable ATP-dependent RNA helicase DDX47 [Source:UniProtKB/Swiss-Prot;Acc:Q29S22]|5|ENSBTAG00000019608|ENSBTAT00000003058	34325.4	36372	30421	38466.4	35231.5	58502.8	78181.9	68613.3
ENSBTAP00000042008	7	7	340.77	0.0752094	1.59355	1;2	2	unstim	PWM	PCYOX1|EntrezGene|prenylcysteine oxidase [Source:RefSeq peptide;Acc:NP_001098944]|11|ENSBTAG00000002783|ENSBTAT00000044517	463515	754428	473595	514905	386139	296940	297361	404172
ENSBTAP00000017445	7	7	295.9	0.0752108	1.5532	3	1	PWM	unstim	||Uncharacterized protein [Source:UniProtKB/TrEMBL;Acc:F1N532]|5|ENSBTAG00000013126|ENSBTAT00000017445	172307	228389	117052	177846	183092	311102	267783	318420
ENSBTAP00000025561	2	2	89.23	0.0753279	2.1804	2;3	2	unstim	PWM	S10A4_BOVIN|UniProtKB/Swiss-Prot|Protein S100-A4 [Source:UniProtKB/Swiss-Prot;Acc:P35466]|3|ENSBTAG00000019203|ENSBTAT00000025561	806710	1.1053e+06	1.61147e+06	626722	747004	575214	350482	230717
ENSBTAP00000016001	1	1	22.41	0.0753327	1.42834	3	1	unstim	PWM	DNAJC3|EntrezGene|dnaJ homolog subfamily C member 3 precursor [Source:RefSeq peptide;Acc:NP_777181]|12|ENSBTAG00000012065|ENSBTAT00000016001	11244.3	12040.1	7610.43	14673.6	9553.07	9280.14	6017.53	7052.45
ENSBTAP00000037887	6	5	200.75	0.0753727	1.2172	2	1	unstim	PWM	Q3ZCM0_BOVIN|UniProtKB/TrEMBL|lymphocyte-specific protein tyrosine kinase [Source:RefSeq peptide;Acc:NP_001029506]|2|ENSBTAG00000012695|ENSBTAT00000038070	72056.5	92662.9	107118	103875	58480.7	62580	84521.5	103086
ENSBTAP00000003812	1	1	26.32	0.0757844	7.55417	3	1	PWM	unstim	IRF4|HGNC Symbol|interferon regulatory factor 4 [Source:HGNC Symbol;Acc:6119]|23|ENSBTAG00000002929|ENSBTAT00000003812	893.612	167.994	4122.54	161.266	1829.47	931.626	23306.4	14312.7
ENSBTAP00000002691	1	1	61.87	0.075842	1.99091	2	1	unstim	PWM	MARCKS|EntrezGene|myristoylated alanine-rich C-kinase substrate [Source:RefSeq peptide;Acc:NP_001069744]|9|ENSBTAG00000002082|ENSBTAT00000002691	19294.3	53097.2	26576.5	37938.9	17912.6	15751.5	15137.1	19964.8
ENSBTAP00000025469	1	1	47.82	0.0758773	1.81002	3	1	PWM	unstim	ZNF326|HGNC Symbol|zinc finger protein 326 [Source:HGNC Symbol;Acc:14104]|3|ENSBTAG00000019133|ENSBTAT00000025469	10596.8	16083.9	15194.6	21792.7	16398.4	43320.1	33030	22491.8
ENSBTAP00000004763	1	1	20.72	0.0760827	10.3834	3	1	PWM	unstim	Q32KM9_BOVIN|UniProtKB/TrEMBL|cell growth-regulating nucleolar protein [Source:RefSeq peptide;Acc:NP_001026939]|6|ENSBTAG00000003653|ENSBTAT00000004763	206.222	0	0	1153.14	2739.66	4003.63	3302.4	4069.05
ENSBTAP00000042926	5	5	220.83	0.0761347	1.50155	2;3	2	PWM	unstim	CSK2B_BOVIN|UniProtKB/Swiss-Prot|Casein kinase II subunit beta [Source:UniProtKB/Swiss-Prot;Acc:P67868]|23|ENSBTAG00000008837|ENSBTAT00000045545	93897.4	158146	139080	89570.4	168242	184699	165394	203450
ENSBTAP00000020731	2	2	49.23	0.0765311	1.3908	2	1	unstim	PWM	ERMP1|HGNC Symbol|endoplasmic reticulum metallopeptidase 1 [Source:HGNC Symbol;Acc:23703]|8|ENSBTAG00000015607|ENSBTAT00000020731	25610.1	28065	19287.7	25367.8	20391.4	13703.7	15338.1	21267.4
ENSBTAP00000028448	2	1	53.1	0.0765922	2.37401	3	1	PWM	unstim	SBF1|HGNC Symbol|SET binding factor 1 [Source:HGNC Symbol;Acc:10542]|5|ENSBTAG00000021337|ENSBTAT00000028448	2252.02	328.514	2813.48	1826.56	3291.99	362.969	8067.57	5419.15
ENSBTAP00000027296	1	1	46.06	0.0769684	2.04961	2	1	unstim	PWM	ARRB1_BOVIN|UniProtKB/Swiss-Prot|Beta-arrestin-1 [Source:UniProtKB/Swiss-Prot;Acc:P17870]|15|ENSBTAG00000020485|ENSBTAT00000027296	16489.3	15451	8045.09	10935.3	8963.02	3114.21	4859.88	7906.9
ENSBTAP00000049149	6	5	274.86	0.0770909	3.56408	2;3	2	PWM	unstim	|||14|ENSBTAG00000046325|ENSBTAT00000054380	134266	44735.3	85625	94645	129281	416065	332583	402541
ENSBTAP00000051181	5	5	184.83	0.0772512	2.23818	1;2	2	unstim	PWM	||Uncharacterized protein [Source:UniProtKB/TrEMBL;Acc:F1MWM8]|13|ENSBTAG00000038048|ENSBTAT00000054341	43667.7	52911.8	48924.1	43634.2	40698.6	25427.2	8302.59	10076.9
ENSBTAP00000014304;ENSBTAP00000011047	6	4	260.78	0.0775123	1.6924	2;3	2	unstim	PWM	MYL6_BOVIN|UniProtKB/Swiss-Prot|Myosin light polypeptide 6 [Source:UniProtKB/Swiss-Prot;Acc:P60661]|5|ENSBTAG00000010799|ENSBTAT00000014304	688086	904723	1.14526e+06	484655	489293	734649	375358	304934
ENSBTAP00000022411	9	6	551.84	0.0778398	1.23453	1;2;3	3	unstim	PWM	F1MNP5_BOVIN|UniProtKB/TrEMBL|14-3-3 protein beta/alpha [Source:RefSeq peptide;Acc:NP_777219]|13|ENSBTAG00000016846|ENSBTAT00000022411	2.41405e+06	3.0784e+06	2.1425e+06	3.02303e+06	2.0891e+06	1.96696e+06	1.78115e+06	2.79603e+06
ENSBTAP00000031993	16	15	1013.16	0.0782135	1.11739	2;3	2	PWM	unstim	HNRNPL|HGNC Symbol|heterogeneous nuclear ribonucleoprotein L [Source:HGNC Symbol;Acc:5045]|18|ENSBTAG00000001055|ENSBTAT00000032051	1.58772e+06	2.53679e+06	2.39728e+06	2.5768e+06	1.90824e+06	3.0124e+06	2.69074e+06	2.55529e+06
ENSBTAP00000026003	4	4	187.92	0.0786077	1.39629	2;3	2	PWM	unstim	PPM1G_BOVIN|UniProtKB/Swiss-Prot|Protein phosphatase 1G [Source:UniProtKB/Swiss-Prot;Acc:P79126]|11|ENSBTAG00000019522|ENSBTAT00000026003	67625.8	101968	66792.2	92051.2	66083	140490	99282.8	152738
ENSBTAP00000026534	16	13	1017.41	0.0791203	2.2458	2;3	2	unstim	PWM	GSN|EntrezGene|gelsolin a [Source:RefSeq peptide;Acc:NP_001106755]|8|ENSBTAG00000019915|ENSBTAT00000026534	2.18072e+06	3.47332e+06	3.23002e+06	3.49323e+06	2.30657e+06	1.49135e+06	871985	841397
ENSBTAP00000016609	1	1	34.75	0.0796111	2.35638	3	1	unstim	PWM	PLCB3|HGNC Symbol|phospholipase C, beta 3 (phosphatidylinositol-specific) [Source:HGNC Symbol;Acc:9056]|29|ENSBTAG00000012510|ENSBTAT00000016609	12711.7	9919.59	13223.7	20991.3	13955.7	3344.94	2416.52	4407.29
ENSBTAP00000042184	1	1	21.21	0.0798061	1.98809	2	1	unstim	PWM	LXN|EntrezGene|latexin [Source:RefSeq peptide;Acc:NP_001073809]|1|ENSBTAG00000009336|ENSBTAT00000044711	19233.7	18968.7	15942.7	21439.9	13400.8	13888.4	6521.44	4208.27
ENSBTAP00000007442;ENSBTAP00000012154	12	9	688.24	0.0799455	1.11029	1;2;3	3	unstim	PWM	1433E_BOVIN|UniProtKB/Swiss-Prot|14-3-3 protein epsilon [Source:UniProtKB/Swiss-Prot;Acc:P62261]|19|ENSBTAG00000005664|ENSBTAT00000007442	1.62034e+06	2.21633e+06	1.5324e+06	1.81639e+06	1.50892e+06	1.81869e+06	1.35315e+06	1.79092e+06
ENSBTAP00000026259;ENSBTAP00000054104	3	3	118.27	0.080138	1.43569	3	1	PWM	unstim	RL31_BOVIN|UniProtKB/Swiss-Prot|60S ribosomal protein L31 [Source:UniProtKB/Swiss-Prot;Acc:Q56JX3]|11|ENSBTAG00000019701|ENSBTAT00000026259	246344	378524	130612	305809	353151	509166	312210	349158
ENSBTAP00000019699	6	3	233.66	0.0804275	1.52097	2;3	2	PWM	unstim	Q2HJH4_BOVIN|UniProtKB/TrEMBL|heterogeneous nuclear ribonucleoprotein D-like [Source:RefSeq peptide;Acc:NP_001077194]|6|ENSBTAG00000014804|ENSBTAT00000019699	104536	193348	150489	120501	189156	319457	141952	214674
ENSBTAP00000005832	4	4	191.43	0.0805368	1.54252	3	1	PWM	unstim	CKAP5|HGNC Symbol|cytoskeleton associated protein 5 [Source:HGNC Symbol;Acc:28959]|15|ENSBTAG00000004448|ENSBTAT00000005832	43295.7	51025.6	33458.9	47556	49829.4	71981.1	82710.8	65938.3
ENSBTAP00000053735	3	3	69.32	0.080554	2.68631	3	1	PWM	unstim	A5PK58_BOVIN|UniProtKB/TrEMBL|ATPase family, AAA domain containing 2 [Source:RefSeq peptide;Acc:NP_001092490]|14|ENSBTAG00000002002|ENSBTAT00000061524	7024.6	3239.78	5664.17	7268.95	7987.5	12838.5	29121.2	12368.5
ENSBTAP00000025945	2	2	115.31	0.0809667	2.16363	2	1	unstim	PWM	NAAA|EntrezGene|N-acylethanolamine-hydrolyzing acid amidase [Source:RefSeq peptide;Acc:NP_001093839]|6|ENSBTAG00000019478|ENSBTAT00000025945	21509.6	37411.3	25444.4	33849.6	22442.6	16438.7	8210.79	7545.19
ENSBTAP00000054130	1	1	37.64	0.0810467	1.4249	1	1	unstim	PWM	|||5|ENSBTAG00000046324|ENSBTAT00000063840	8853.4	6570.76	9170.1	6374.34	6229.4	6081.14	6572.43	2850.9
ENSBTAP00000004242	27	26	1331.58	0.0811047	1.56791	1;2;3	3	unstim	PWM	ANK1|HGNC Symbol|ankyrin 1, erythrocytic [Source:HGNC Symbol;Acc:492]|27|ENSBTAG00000003275|ENSBTAT00000004242	8.25446e+06	291767	470161	823293	5.02497e+06	202413	487930	560353
ENSBTAP00000043730	1	1	26.77	0.081442	Infinity	2	1	PWM	unstim	VPS13D|HGNC Symbol|vacuolar protein sorting 13 homolog D (S. cerevisiae) [Source:HGNC Symbol;Acc:23595]|16|ENSBTAG00000016080|ENSBTAT00000046426	0	0	0	0	27068.2	123.099	0	490.418
ENSBTAP00000006437	3	1	138.14	0.0818439	1.21024	2;3	2	PWM	unstim	||Uncharacterized protein [Source:UniProtKB/TrEMBL;Acc:F1MIA3]|4|ENSBTAG00000000715|ENSBTAT00000006437	19691.8	39593.1	48071.5	21848.2	22706	56580.6	48599.4	28482.5
ENSBTAP00000026694	2	2	57.22	0.0818495	1.84746	2	1	unstim	PWM	A5D977_BOVIN|UniProtKB/TrEMBL|ras-related protein Ral-B [Source:RefSeq peptide;Acc:NP_001091454]|2|ENSBTAG00000032021|ENSBTAT00000026694	48117	60663	59659.8	57352.6	46933	35464.3	23692.1	16128.4
ENSBTAP00000012886	8	8	329.48	0.0820243	1.46672	2	1	PWM	unstim	GPDM_BOVIN|UniProtKB/Swiss-Prot|Glycerol-3-phosphate dehydrogenase, mitochondrial [Source:UniProtKB/Swiss-Prot;Acc:A6QLU1]|2|ENSBTAG00000009770|ENSBTAT00000012886	152533	236444	171357	170930	344068	272124	234751	221617
ENSBTAP00000024318	3	3	75.66	0.0820852	1.32396	3	1	unstim	PWM	NFATC2|HGNC Symbol|nuclear factor of activated T-cells, cytoplasmic, calcineurin-dependent 2 [Source:HGNC Symbol;Acc:7776]|13|ENSBTAG00000018270|ENSBTAT00000024318	65011.6	60337	55574.8	53766.8	37914.1	40570.6	52627.7	46151.1
ENSBTAP00000038810;ENSBTAP00000028729	5	2	149.55	0.0823655	1.26806	1;3	2	unstim	PWM	LOC509513|EntrezGene|hypothetical protein LOC509513 [Source:RefSeq peptide;Acc:NP_001074373]|4|ENSBTAG00000034609|ENSBTAT00000039006	67962.8	82276.4	68166.1	76626.3	42329.5	67523.8	67370.3	55440
ENSBTAP00000023627;ENSBTAP00000016866	3	3	120.72	0.082473	1.32419	2	1	unstim	PWM	GSTM1_BOVIN|UniProtKB/Swiss-Prot|Glutathione S-transferase Mu 1 [Source:UniProtKB/Swiss-Prot;Acc:Q9N0V4]|3|ENSBTAG00000017765|ENSBTAT00000023627	41751.7	36852.2	37594.7	45013.9	35320.3	34918.7	25860.9	25644.1
ENSBTAP00000018473	8	6	462.28	0.0825386	1.58808	2;3	2	unstim	PWM	TXNRD1|EntrezGene|thioredoxin reductase 1, cytoplasmic [Source:RefSeq peptide;Acc:NP_777050]|5|ENSBTAG00000013912|ENSBTAT00000018473	290145	381893	209336	365008	296315	154170	121650	212702
ENSBTAP00000011240	5	3	235.82	0.0826067	1.39034	2;3	2	PWM	unstim	SRSF6|EntrezGene|splicing factor, arginine/serine-rich 6 [Source:RefSeq peptide;Acc:NP_001030349]|13|ENSBTAG00000008527|ENSBTAT00000011240	132210	183586	100298	174838	163901	230319	213982	213393
ENSBTAP00000011125	5	5	137.61	0.0827891	1.55883	2;3	2	unstim	PWM	A6QQV8_BOVIN|UniProtKB/TrEMBL|lamin-B receptor [Source:RefSeq peptide;Acc:NP_001093799]|16|ENSBTAG00000008453|ENSBTAT00000011125	317077	386593	266620	393861	185181	231625	278254	180053
ENSBTAP00000025492	2	2	57.91	0.0829882	2.00937	3	1	PWM	unstim	JMJD6_BOVIN|UniProtKB/Swiss-Prot|Bifunctional arginine demethylase and lysyl-hydroxylase JMJD6 [Source:UniProtKB/Swiss-Prot;Acc:Q58DS6]|19|ENSBTAG00000019153|ENSBTAT00000025492	6037.08	6016.8	5219.39	10960.2	9476.78	7108.99	19980.8	20164.9
ENSBTAP00000025128	4	4	79.24	0.0830394	2.05339	3	1	unstim	PWM	PDIA5_BOVIN|UniProtKB/Swiss-Prot|Protein disulfide-isomerase A5 [Source:UniProtKB/Swiss-Prot;Acc:Q2KIL5]|1|ENSBTAG00000018877|ENSBTAT00000025128	242951	420417	122344	230647	152176	128795	118395	95599.7
ENSBTAP00000024007;ENSBTAP00000008517	5	5	360.62	0.083293	1.18025	2;3	2	unstim	PWM	PIP4K2A|HGNC Symbol|phosphatidylinositol-5-phosphate 4-kinase, type II, alpha [Source:HGNC Symbol;Acc:8997]|13|ENSBTAG00000018033|ENSBTAT00000024007	597768	528088	495779	564674	544500	415205	482038	410662
ENSBTAP00000002020	3	2	133.21	0.0835592	1.82573	2;3	2	PWM	unstim	A5PJF5_BOVIN|UniProtKB/TrEMBL|BRI3-binding protein [Source:RefSeq peptide;Acc:NP_001092557]|17|ENSBTAG00000001543|ENSBTAT00000002020	18995.3	36888.9	49419.3	23362.4	53194.8	50640.2	55948.1	75126.3
ENSBTAP00000011382	13	13	522.2	0.0837767	1.17304	2;3	2	unstim	PWM	COR1A_BOVIN|UniProtKB/Swiss-Prot|Coronin-1A [Source:UniProtKB/Swiss-Prot;Acc:Q92176]|25|ENSBTAG00000008631|ENSBTAT00000011382	6.95803e+06	9.22663e+06	9.462e+06	8.02572e+06	6.91381e+06	8.08389e+06	7.0131e+06	6.69432e+06
ENSBTAP00000049672	1	1	31.09	0.0837894	1.94494	2	1	PWM	unstim	A8E4N7_BOVIN|UniProtKB/TrEMBL|TBC1 domain family member 10A [Source:RefSeq peptide;Acc:NP_001098444]|17|ENSBTAG00000018086|ENSBTAT00000055485	561.557	1137.89	1027	3455.88	2727.98	1409.34	2813.54	5073.38
ENSBTAP00000028520	11	11	549.44	0.0838107	1.28378	1;2;3	3	PWM	unstim	Q2KJE7_BOVIN|UniProtKB/TrEMBL|proteasome activator complex subunit 1 [Source:RefSeq peptide;Acc:NP_001019680]|10|ENSBTAG00000021395|ENSBTAT00000028520	1.69864e+06	1.89856e+06	2.02491e+06	2.0438e+06	2.1821e+06	3.1199e+06	2.3851e+06	2.15426e+06
ENSBTAP00000017187	3	3	109.81	0.0839037	1.47041	3	1	unstim	PWM	Q0VC96_BOVIN|UniProtKB/TrEMBL|thymocyte nuclear protein 1 [Source:RefSeq peptide;Acc:NP_001069890]|15|ENSBTAG00000012936|ENSBTAT00000017187	131636	170555	189835	146536	123787	118604	86028.8	105855
ENSBTAP00000019509	1	1	21.07	0.0839326	2.18138	3	1	PWM	unstim	TRPM8|HGNC Symbol|transient receptor potential cation channel, subfamily M, member 8 [Source:HGNC Symbol;Acc:17961]|3|ENSBTAG00000014652|ENSBTAT00000019509	3809.48	2311.35	35091.5	2415.61	18899.3	8441.55	34906.1	32922
ENSBTAP00000006213	43	35	1973.72	0.0842257	1.84971	3	1	unstim	PWM	SPTB|HGNC Symbol|spectrin, beta, erythrocytic [Source:HGNC Symbol;Acc:11274]|10|ENSBTAG00000004732|ENSBTAT00000006213	3.454e+06	337972	502491	338794	1.57525e+06	193971	520092	215541
ENSBTAP00000039110	1	1	21.22	0.0843654	1.36657	3	1	unstim	PWM	C13H20orf43|EntrezGene|hypothetical protein LOC513536 [Source:RefSeq peptide;Acc:NP_001069093]|13|ENSBTAG00000027390|ENSBTAT00000039313	2818.37	3633.39	1653.82	2345.88	1974.83	2750.85	1639.32	1282.95
ENSBTAP00000009477	3	3	105.48	0.0846622	1.17564	1;2	2	PWM	unstim	STT3A_BOVIN|UniProtKB/Swiss-Prot|Dolichyl-diphosphooligosaccharide--protein glycosyltransferase subunit STT3A [Source:UniProtKB/Swiss-Prot;Acc:Q2KJI2]|29|ENSBTAG00000007203|ENSBTAT00000009477	48151.8	62583.1	48078.4	46324.4	67830.6	70586.2	52752.3	49999
ENSBTAP00000023373	9	9	441.81	0.0850237	1.3516	3	1	unstim	PWM	F1MYG5_BOVIN|UniProtKB/TrEMBL|lamin A/C [Source:RefSeq peptide;Acc:NP_001029225]|3|ENSBTAG00000017574|ENSBTAT00000023373	658291	855940	702046	396573	663086	648661	382711	238696
ENSBTAP00000009896	8	8	304.86	0.0852722	1.55082	3	1	PWM	unstim	ADAR|HGNC Symbol|adenosine deaminase, RNA-specific [Source:HGNC Symbol;Acc:225]|3|ENSBTAG00000007519|ENSBTAT00000009896	87884.2	84393.9	82637.9	130705	124714	132413	202224	138679
ENSBTAP00000023157	1	1	25.93	0.0853059	3.93988	3	1	PWM	unstim	RRP1B|HGNC Symbol|ribosomal RNA processing 1 homolog B (S. cerevisiae) [Source:HGNC Symbol;Acc:23818]|1|ENSBTAG00000017418|ENSBTAT00000023157	11937.9	570.062	12379.9	11148.1	16395.3	10345.9	91624.4	23612
ENSBTAP00000001336	1	1	28.61	0.0853914	2.23015	1	1	PWM	unstim	Q69GU5_BOVIN|UniProtKB/TrEMBL|perforin-1 [Source:RefSeq peptide;Acc:NP_001137207]|28|ENSBTAG00000001008|ENSBTAT00000001336	768.189	6788.05	733.262	654.431	2876.81	11284.5	4985.34	799.597
ENSBTAP00000002705	1	1	51.74	0.0854624	1.8734	3	1	PWM	unstim	MEN1_BOVIN|UniProtKB/Swiss-Prot|Menin [Source:UniProtKB/Swiss-Prot;Acc:Q0P5I0]|29|ENSBTAG00000002095|ENSBTAT00000002705	2787.34	604.969	10902.4	2113.07	6034.71	590.948	18122.8	5989.82
ENSBTAP00000012121	11	10	422.76	0.0858268	1.2547	2;3	2	unstim	PWM	CORO7|EntrezGene|coronin-7 [Source:RefSeq peptide;Acc:NP_001069371]|25|ENSBTAG00000009201|ENSBTAT00000012121	735669	589481	805560	528987	601558	398785	582397	537048
ENSBTAP00000053818	1	1	39.36	0.0860427	1.89977	3	1	PWM	unstim	ROCK1|HGNC Symbol|Rho-associated, coiled-coil containing protein kinase 1 [Source:HGNC Symbol;Acc:10251]|24|ENSBTAG00000008403|ENSBTAT00000061061	2775.57	321.434	4761.4	2340.98	4431.51	2371.53	7758.29	4815.21
ENSBTAP00000008174	2	2	53.71	0.0864261	2.4666	3	1	PWM	unstim	Q2KI86_BOVIN|UniProtKB/TrEMBL|replication protein A2, 32kDa [Source:RefSeq peptide;Acc:NP_001039449]|2|ENSBTAG00000006225|ENSBTAT00000008174	10330.9	18982.8	30404.9	6537.08	24167.6	47244.2	36707.4	55307.5
ENSBTAP00000015991	2	2	86.5	0.0864732	3.5324	3	1	unstim	PWM	PADI4|HGNC Symbol|peptidyl arginine deiminase, type IV [Source:HGNC Symbol;Acc:18368]|2|ENSBTAG00000012052|ENSBTAT00000015991	2859.04	689.946	14858.6	3811.28	2431.95	295.326	1951.63	1611.09
ENSBTAP00000045984	8	7	355.86	0.0864764	1.38596	2;3	2	unstim	PWM	GCLC|EntrezGene|glutamate--cysteine ligase catalytic subunit [Source:RefSeq peptide;Acc:NP_001077143]|23|ENSBTAG00000015571|ENSBTAT00000049040	294636	163857	148108	201448	193173	83958.7	138725	167166
ENSBTAP00000041391;ENSBTAP00000054054	12	11	590.04	0.0864892	1.41072	3	1	unstim	PWM	NUP210|HGNC Symbol|nucleoporin 210kDa [Source:HGNC Symbol;Acc:30052]|22|ENSBTAG00000003665|ENSBTAT00000043850	507782	538254	501107	303461	315355	270565	501486	224408
ENSBTAP00000010525;ENSBTAP00000055702	2	2	70.81	0.0865503	1.47569	2	1	unstim	PWM	NCF2|EntrezGene|neutrophil cytosol factor 2 [Source:RefSeq peptide;Acc:NP_776545]|16|ENSBTAG00000008004|ENSBTAT00000010525	27497.8	37038.1	23774.6	39956.3	28939.7	21047.2	15866.3	21066.8
ENSBTAP00000021075	3	3	74.99	0.0865536	1.52494	2	1	unstim	PWM	C560_BOVIN|UniProtKB/Swiss-Prot|Succinate dehydrogenase cytochrome b560 subunit, mitochondrial [Source:UniProtKB/Swiss-Prot;Acc:P35720]|3|ENSBTAG00000015853|ENSBTAT00000021075	109744	170592	81280.4	90410.1	68985	78593	64806.2	84037.3
ENSBTAP00000026332	2	2	76.71	0.086603	1.57034	2	1	PWM	unstim	IDE_BOVIN|UniProtKB/Swiss-Prot|Insulin-degrading enzyme [Source:UniProtKB/Swiss-Prot;Acc:Q24K02]|26|ENSBTAG00000019759|ENSBTAT00000026332	17499.1	24616.6	16068.1	15648.2	23250	25468	31464.1	35759.4
ENSBTAP00000049139	3	1	146.96	0.0866408	1.78246	2;3	2	PWM	unstim	E1BG13_BOVIN|UniProtKB/TrEMBL|40S ribosomal protein S6 [Source:UniProtKB/TrEMBL;Acc:E1BG13]|8|ENSBTAG00000023462|ENSBTAT00000014877	104057	60651.6	132258	73208.8	112114	201677	205287	140742
ENSBTAP00000038567	1	1	26.84	0.0868409	1.69502	1	1	unstim	PWM	PTAFR_BOVIN|UniProtKB/Swiss-Prot|Platelet-activating factor receptor [Source:UniProtKB/Swiss-Prot;Acc:Q9TTY5]|2|ENSBTAG00000027051|ENSBTAT00000038757	12942.3	13701.2	7530.66	10728.4	9751.07	10780.4	3328.08	2631.34
ENSBTAP00000006432	21	18	1495.82	0.0868441	3.29524	2;3	2	unstim	PWM	TGM3|EntrezGene|protein-glutamine gamma-glutamyltransferase E [Source:RefSeq peptide;Acc:NP_001095318]|13|ENSBTAG00000001785|ENSBTAT00000006432	5.51429e+06	1.42124e+07	1.22898e+07	9.8808e+06	7.04702e+06	2.51753e+06	1.52677e+06	1.62316e+06
ENSBTAP00000027728	1	1	26.53	0.0876027	2.5119	3	1	PWM	unstim	RS30_BOVIN|UniProtKB/Swiss-Prot|40S ribosomal protein S30 [Source:UniProtKB/Swiss-Prot;Acc:P62866]|29|ENSBTAG00000020807|ENSBTAT00000027728	349.892	3419.04	8324.36	28686.4	11800.5	11183.3	26342	53108.8
ENSBTAP00000014015	4	3	145.04	0.0876266	1.37153	2;3	2	PWM	unstim	SRP72|HGNC Symbol|signal recognition particle 72kDa [Source:HGNC Symbol;Acc:11303]|6|ENSBTAG00000010593|ENSBTAT00000014015	57382.2	55718.6	61629.7	83628.4	82870.7	89016.6	103192	79266.4
ENSBTAP00000003602	6	5	209.38	0.088245	1.71357	3	1	PWM	unstim	SF3B2|EntrezGene|splicing factor 3B subunit 2 [Source:RefSeq peptide;Acc:NP_001096741]|29|ENSBTAG00000002778|ENSBTAT00000003602	38018.7	39564.2	44369.3	75730.7	71924	120710	57123.1	88987.2
ENSBTAP00000016813;ENSBTAP00000019230	2	2	80.53	0.0885977	1.20212	3	1	unstim	PWM	KCC2B_BOVIN|UniProtKB/Swiss-Prot|Calcium/calmodulin-dependent protein kinase type II subunit beta [Source:UniProtKB/Swiss-Prot;Acc:Q3MHJ9]|4|ENSBTAG00000012653|ENSBTAT00000016813	13926.8	13462.8	24243.2	10322.7	11931.6	10028.6	19096.5	10481.8
ENSBTAP00000043570	11	11	541.31	0.0888471	1.24385	1;2;3	3	PWM	unstim	||Uncharacterized protein [Source:UniProtKB/TrEMBL;Acc:F1MF76]|25|ENSBTAG00000017759|ENSBTAT00000046252	197714	328636	177528	230763	261483	317350	270878	312844
ENSBTAP00000052156	5	5	179.36	0.0889993	1.10807	2	1	PWM	unstim	CAB39_BOVIN|UniProtKB/Swiss-Prot|Calcium-binding protein 39 [Source:UniProtKB/Swiss-Prot;Acc:Q29RI6]|2|ENSBTAG00000040055|ENSBTAT00000053463	109947	123357	130338	115190	111525	130338	149103	139614
ENSBTAP00000043215	2	2	79.03	0.0890188	1.3277	1	1	unstim	PWM	A6H7H6_BOVIN|UniProtKB/TrEMBL|cadherin-17 [Source:RefSeq peptide;Acc:NP_001092372]|14|ENSBTAG00000021964|ENSBTAT00000045860	47801.9	56341.9	11776.9	12283.3	25658.9	55172.3	6030.78	9699.23
ENSBTAP00000010159;ENSBTAP00000008925;ENSBTAP00000022409	11	5	557.48	0.0890748	1.12809	2;3	2	unstim	PWM	ARF1_BOVIN|UniProtKB/Swiss-Prot|ADP-ribosylation factor 1 [Source:UniProtKB/Swiss-Prot;Acc:P84080]|7|ENSBTAG00000007725|ENSBTAT00000010159	1.3884e+06	1.97941e+06	1.55913e+06	1.57589e+06	1.38361e+06	1.61629e+06	1.30303e+06	1.46153e+06
ENSBTAP00000012818	13	12	490.68	0.0894972	1.89296	3	1	PWM	unstim	PDCD11|EntrezGene|protein RRP5 homolog [Source:RefSeq peptide;Acc:NP_001095573]|26|ENSBTAG00000009715|ENSBTAT00000012818	137668	92627.4	108301	127396	137258	172192	345615	227039
ENSBTAP00000029234	2	2	45.53	0.0895235	15.2322	3	1	PWM	unstim	AATF|HGNC Symbol|apoptosis antagonizing transcription factor [Source:HGNC Symbol;Acc:19235]|19|ENSBTAG00000021927|ENSBTAT00000029234	1036.1	0	1241.32	689.058	3533.95	2801.57	21274.1	17576.4
ENSBTAP00000011884	4	3	109.38	0.0902407	1.43985	3	1	unstim	PWM	PACS1|EntrezGene|phosphofurin acidic cluster sorting protein 1 [Source:RefSeq peptide;Acc:NP_001137342]|29|ENSBTAG00000009026|ENSBTAT00000011884	29057.6	37961.5	26954.7	44286.1	20164.3	25114.6	27786.1	22958.5
ENSBTAP00000017416	6	3	293.41	0.0905091	2.24797	2;3	2	unstim	PWM	Q3ZBY4_BOVIN|UniProtKB/TrEMBL|fructose-bisphosphate aldolase C [Source:RefSeq peptide;Acc:NP_001091453]|19|ENSBTAG00000013099|ENSBTAT00000017416	30318.3	44296.8	31000.2	64702.5	32002.9	18905.9	11834.2	13022
ENSBTAP00000027662;ENSBTAP00000041048	7	4	288.54	0.090661	1.35113	1;2;3	3	PWM	unstim	Q3SYT9_BOVIN|UniProtKB/TrEMBL|poly(rC)-binding protein 2 [Source:RefSeq peptide;Acc:NP_001029883]|5|ENSBTAG00000020757|ENSBTAT00000027662	425593	538713	604378	454202	506710	641157	717469	867847
ENSBTAP00000006754	20	19	945.17	0.0907107	1.35056	2;3	2	PWM	unstim	A7MBA2_BOVIN|UniProtKB/TrEMBL|26S proteasome non-ATPase regulatory subunit 1 [Source:RefSeq peptide;Acc:NP_001094547]|2|ENSBTAG00000005119|ENSBTAT00000006754	970970	778486	687187	709239	988180	949480	1.04391e+06	1.26715e+06
ENSBTAP00000030814	1	1	70.71	0.0908365	3.27267	2	1	PWM	unstim	Q32LA8_BOVIN|UniProtKB/TrEMBL|serine/threonine kinase 39 [Source:RefSeq peptide;Acc:NP_001069294]|2|ENSBTAG00000017162|ENSBTAT00000030845	1908.91	1118.47	1410.19	1378.54	2471.94	1652.11	5391.96	9518.2
ENSBTAP00000002491;ENSBTAP00000023525	8	8	476.52	0.0908844	1.24721	2;3	2	PWM	unstim	RBM39|HGNC Symbol|RNA binding motif protein 39 [Source:HGNC Symbol;Acc:15923]|13|ENSBTAG00000003949|ENSBTAT00000002491	456143	554729	443749	534686	464613	708714	682785	624976
ENSBTAP00000012731	1	1	59.04	0.0909412	1.81499	3	1	PWM	unstim	RNH2A_BOVIN|UniProtKB/Swiss-Prot|Ribonuclease H2 subunit A [Source:UniProtKB/Swiss-Prot;Acc:Q2TBT5]|7|ENSBTAG00000009661|ENSBTAT00000012731	6655.59	11100.5	11937.9	13837.9	8646.84	33895.7	19741.5	16725.7
ENSBTAP00000042536	7	7	257.58	0.0909982	1.42842	1;2	2	PWM	unstim	LAMP1_BOVIN|UniProtKB/Swiss-Prot|Lysosome-associated membrane glycoprotein 1 [Source:UniProtKB/Swiss-Prot;Acc:Q05204]|12|ENSBTAG00000010242|ENSBTAT00000045121	786779	1.19473e+06	536363	631434	1.65722e+06	1.31664e+06	732760	791908
ENSBTAP00000008609	7	6	167.63	0.0910967	1.52777	2;3	2	unstim	PWM	Q08E18_BOVIN|UniProtKB/TrEMBL|hepatoma-derived growth factor [Source:RefSeq peptide;Acc:NP_787026]|3|ENSBTAG00000039793|ENSBTAT00000008609	214999	324280	276070	216048	147686	308064	97165.9	122183
ENSBTAP00000001360;ENSBTAP00000003537	6	6	265.23	0.0914334	1.61335	3	1	unstim	PWM	ARID1A|HGNC Symbol|AT rich interactive domain 1A (SWI-like) [Source:HGNC Symbol;Acc:11110]|2|ENSBTAG00000001024|ENSBTAT00000001360	290420	277661	99170.6	199033	185681	136781	106236	108247
ENSBTAP00000011424	1	1	46.26	0.0914636	1.71157	2;3	2	PWM	unstim	EI2BB_BOVIN|UniProtKB/Swiss-Prot|Translation initiation factor eIF-2B subunit beta [Source:UniProtKB/Swiss-Prot;Acc:Q5E9B4]|10|ENSBTAG00000008664|ENSBTAT00000011424	39402.6	18717.9	19538	38923.7	39362.6	31868.2	58872.3	69435.3
ENSBTAP00000004410;ENSBTAP00000038110	15	15	734.86	0.0915663	1.24223	1;2;3	3	unstim	PWM	ARP3_BOVIN|UniProtKB/Swiss-Prot|Actin-related protein 3 [Source:UniProtKB/Swiss-Prot;Acc:P61157]|2|ENSBTAG00000003401|ENSBTAT00000004410	6.34682e+06	7.1185e+06	6.508e+06	6.54125e+06	5.77786e+06	4.47808e+06	6.06246e+06	5.02587e+06
ENSBTAP00000016073	2	2	53.12	0.0917792	1.34676	1	1	PWM	unstim	VAS1_BOVIN|UniProtKB/Swiss-Prot|V-type proton ATPase subunit S1 [Source:UniProtKB/Swiss-Prot;Acc:P40682]|X|ENSBTAG00000012117|ENSBTAT00000016073	114569	81633.7	79909.5	67408.1	174896	128258	81099.8	78385.3
ENSBTAP00000020226	1	1	43.64	0.0919522	1.90283	2	1	PWM	unstim	L2HDH_BOVIN|UniProtKB/Swiss-Prot|L-2-hydroxyglutarate dehydrogenase, mitochondrial [Source:UniProtKB/Swiss-Prot;Acc:A7MBI3]|10|ENSBTAG00000015200|ENSBTAT00000020226	1306.07	2984.54	956.452	2580.7	3760.83	3057.43	3857.67	4218.92
ENSBTAP00000002080	9	9	382.66	0.0919584	1.147	1;2	2	PWM	unstim	TM9SF2|HGNC Symbol|transmembrane 9 superfamily member 2 [Source:HGNC Symbol;Acc:11865]|12|ENSBTAG00000001589|ENSBTAT00000002080	340967	473364	344694	335904	454937	538837	362602	358312
ENSBTAP00000017090	2	1	44.48	0.0919904	1.49888	2	1	unstim	PWM	5NTC_BOVIN|UniProtKB/Swiss-Prot|Cytosolic purine 5'-nucleotidase [Source:UniProtKB/Swiss-Prot;Acc:O46411]|26|ENSBTAG00000012858|ENSBTAT00000017090	6983.66	9663.38	10555.7	6583.39	7612.33	5268.03	5664.3	3996.19
ENSBTAP00000017446	9	9	408.67	0.0921282	1.75864	1;2	2	unstim	PWM	UPAR_BOVIN|UniProtKB/Swiss-Prot|Urokinase plasminogen activator surface receptor [Source:UniProtKB/Swiss-Prot;Acc:Q05588]|18|ENSBTAG00000013125|ENSBTAT00000017446	370853	942176	839508	762831	321701	744082	352446	239509
ENSBTAP00000028220	1	1	43.59	0.0926311	1.52891	2	1	PWM	unstim	F1MXX5_BOVIN|UniProtKB/TrEMBL|Uncharacterized protein [Source:UniProtKB/TrEMBL;Acc:F1MXX5]|3|ENSBTAG00000021174|ENSBTAT00000028220	8695.14	10358.4	9764.81	10134.9	8606.11	14226	15675.6	21048.4
ENSBTAP00000013123	11	11	400.28	0.0927555	1.39649	2;3	2	PWM	unstim	F1MTX7_BOVIN|UniProtKB/TrEMBL|aspartyl-tRNA synthetase, cytoplasmic [Source:RefSeq peptide;Acc:NP_001030257]|2|ENSBTAG00000009949|ENSBTAT00000013123	335812	356201	276492	326956	344857	545085	519550	399607
ENSBTAP00000053967;ENSBTAP00000044161	5	5	176.51	0.0929446	1.16507	1	1	PWM	unstim	Q3ZCH8_BOVIN|UniProtKB/TrEMBL|sodium/potassium-transporting ATPase subunit beta-1 [Source:RefSeq peptide;Acc:NP_001030411]|16|ENSBTAG00000002688|ENSBTAT00000063162	216427	280670	350704	191290	289597	311294	416533	193193
ENSBTAP00000007787	9	1	277.32	0.0929691	2.74335	2;3	2	unstim	PWM	SPTBN2|HGNC Symbol|spectrin, beta, non-erythrocytic 2 [Source:HGNC Symbol;Acc:11276]|29|ENSBTAG00000005929|ENSBTAT00000007787	164271	31751.7	61153.2	99099.6	35263.9	25659.8	45595.7	23349.3
ENSBTAP00000007351	1	1	22.64	0.0929804	1.82828	3	1	unstim	PWM	PNPLA6|EntrezGene|neuropathy target esterase [Source:RefSeq peptide;Acc:NP_001070015]|7|ENSBTAG00000032137|ENSBTAT00000007351	7707.42	8667.18	6458.08	4463.75	4056.68	2213.3	6235.74	2424.36
ENSBTAP00000008734;ENSBTAP00000001787;ENSBTAP00000012430	12	12	556.62	0.0931697	1.46717	2;3	2	PWM	unstim	Q5E949_BOVIN|UniProtKB/TrEMBL|protein arginine N-methyltransferase 1 [Source:RefSeq peptide;Acc:NP_001015624]|18|ENSBTAG00000006646|ENSBTAT00000008734	653988	794581	533458	604050	631303	1.14982e+06	1.06985e+06	943255
ENSBTAP00000027459	1	1	21.32	0.0935027	1.34399	1	1	PWM	unstim	A5D7P7_BOVIN|UniProtKB/TrEMBL|ATP-binding cassette sub-family B member 6, mitochondrial [Source:RefSeq peptide;Acc:NP_001091625]|2|ENSBTAG00000020607|ENSBTAT00000027459	6932.17	0.596637	1.60892	331.481	8210.34	86.3853	42.7479	1425.75
ENSBTAP00000050307	2	1	48.6	0.0935396	2.75883	3	1	PWM	unstim	CEBPZ|EntrezGene|CCAAT/enhancer-binding protein zeta [Source:RefSeq peptide;Acc:NP_001076855]|11|ENSBTAG00000039770|ENSBTAT00000053855	5985.69	2929.05	8885.66	3660.03	5346.05	8192.85	37255.3	8411.58
ENSBTAP00000030039	2	2	66.14	0.093622	1.54657	1	1	PWM	unstim	FAM3C_BOVIN|UniProtKB/Swiss-Prot|Protein FAM3C [Source:UniProtKB/Swiss-Prot;Acc:A5PKI3]|4|ENSBTAG00000007976|ENSBTAT00000030051	282814	1.14402e+06	282441	45114.7	548900	1.5109e+06	608224	45259.8
ENSBTAP00000007970	2	2	105.56	0.0938237	1.19767	1;2;3	3	unstim	PWM	CDS2_BOVIN|UniProtKB/Swiss-Prot|Phosphatidate cytidylyltransferase 2 [Source:UniProtKB/Swiss-Prot;Acc:A0JNC1]|13|ENSBTAG00000006066|ENSBTAT00000007970	300193	317394	280236	281609	258232	316032	220208	190302
ENSBTAP00000038344;ENSBTAP00000052642	12	2	585.16	0.0938999	1.4382	2;3	2	unstim	PWM	F1N453_BOVIN|UniProtKB/TrEMBL|histone H2B [Source:RefSeq peptide;Acc:NP_001099113]|3|ENSBTAG00000038025|ENSBTAT00000038531	7.96225e+06	1.29327e+07	7.62138e+06	6.07151e+06	8.22753e+06	8.93178e+06	3.44902e+06	3.44105e+06
ENSBTAP00000007879	1	1	27.94	0.0939252	1.54657	3	1	PWM	unstim	DIDO1|HGNC Symbol|death inducer-obliterator 1 [Source:HGNC Symbol;Acc:2680]|13|ENSBTAG00000006002|ENSBTAT00000007879	2838.9	5631.46	6339.41	3191.4	6030.34	6334.62	7523.82	7951.3
ENSBTAP00000028655	1	1	33.27	0.0940663	1.29769	1	1	unstim	PWM	PSAP|EntrezGene|proactivator polypeptide [Source:RefSeq peptide;Acc:NP_776586]|28|ENSBTAG00000021499|ENSBTAT00000028655	18837.5	14836.1	6770.42	13336.6	14370.4	14258.7	5454.13	7360.15
ENSBTAP00000009488;ENSBTAP00000038121	8	5	321.31	0.0941734	2.22665	1	1	unstim	PWM	A6QPC6_BOVIN|UniProtKB/TrEMBL|tyrosine-protein phosphatase non-receptor type substrate 1 [Source:RefSeq peptide;Acc:NP_786982]|13|ENSBTAG00000007213|ENSBTAT00000009488	215206	293912	347732	349555	188454	199259	71154.2	82935.9
ENSBTAP00000027078	12	4	525.96	0.0944645	1.45018	2;3	2	PWM	unstim	AP2B1|EntrezGene|AP-2 complex subunit beta [Source:RefSeq peptide;Acc:NP_001068593]|19|ENSBTAG00000020316|ENSBTAT00000027078	35761.5	16522.8	37280.7	35982	34204.8	23703.2	56522.2	67635.5
ENSBTAP00000056202	8	7	198.47	0.0945953	1.33773	2;3	2	unstim	PWM	ARHGAP4|EntrezGene|Rho GTPase activating protein 4 [Source:RefSeq peptide;Acc:NP_001096010]|X|ENSBTAG00000047531|ENSBTAT00000063618	119952	111264	143441	110064	95087.8	53694.6	120867	92697.8
ENSBTAP00000003770	5	5	132.71	0.0945993	1.19682	1	1	PWM	unstim	ANO6|HGNC Symbol|anoctamin 6 [Source:HGNC Symbol;Acc:25240]|5|ENSBTAG00000002902|ENSBTAT00000003770	138994	123369	188414	116332	182650	169796	181165	145113
ENSBTAP00000007519	3	3	144.83	0.0950995	2.26488	2	1	unstim	PWM	PLIN2|EntrezGene|perilipin-2 [Source:RefSeq peptide;Acc:NP_776405]|8|ENSBTAG00000005718|ENSBTAT00000007519	64551.1	68052.4	65724.8	100700	81076	18411.3	15728.4	16812.6
ENSBTAP00000003242	1	1	64.83	0.0953979	1.54953	3	1	unstim	PWM	BRD4|HGNC Symbol|bromodomain containing 4 [Source:HGNC Symbol;Acc:13575]|7|ENSBTAG00000002495|ENSBTAT00000003242	55591.8	98484.2	93478.4	54180.2	53610.1	75109.4	37775.3	28231.8
ENSBTAP00000024578	1	1	20.05	0.095398	1.5156	3	1	unstim	PWM	C14orf45|HGNC Symbol|chromosome 14 open reading frame 45 [Source:HGNC Symbol;Acc:19855]|10|ENSBTAG00000018467|ENSBTAT00000024578	16978.2	25303	46883.8	24029.5	12944.5	10132.6	29310.8	22298.3
ENSBTAP00000015804	12	12	519.24	0.0956449	1.36283	2;3	2	unstim	PWM	CKAP4|HGNC Symbol|cytoskeleton-associated protein 4 [Source:HGNC Symbol;Acc:16991]|5|ENSBTAG00000011913|ENSBTAT00000015804	405468	866375	447945	402995	410246	526860	290278	330241
ENSBTAP00000007054	6	6	252.1	0.0957063	2.0495	3	1	unstim	PWM	VRK3_BOVIN|UniProtKB/Swiss-Prot|Inactive serine/threonine-protein kinase VRK3 [Source:UniProtKB/Swiss-Prot;Acc:Q2YDN8]|18|ENSBTAG00000005367|ENSBTAT00000007054	212895	347014	160109	192653	99202.5	98174.3	182754	65183.2
ENSBTAP00000021658	10	10	510.37	0.0957335	1.13475	2	1	PWM	unstim	A5D7C6_BOVIN|UniProtKB/TrEMBL|prolyl endopeptidase [Source:RefSeq peptide;Acc:NP_777197]|9|ENSBTAG00000016281|ENSBTAT00000021658	227969	341374	317776	306072	268960	333369	367912	383734
ENSBTAP00000023988	2	2	88.47	0.0961725	1.38772	2	1	unstim	PWM	A6QLR9_BOVIN|UniProtKB/TrEMBL|mitogen-activated protein kinase 14A [Source:RefSeq peptide;Acc:NP_001095644]|23|ENSBTAG00000020783|ENSBTAT00000023988	16892	25242.6	27500.6	20133.4	14873.7	15097.7	15604.8	19111.9
ENSBTAP00000005747	3	3	74.64	0.0961999	1.28171	2;3	2	unstim	PWM	ETHE1_BOVIN|UniProtKB/Swiss-Prot|Protein ETHE1, mitochondrial [Source:UniProtKB/Swiss-Prot;Acc:Q3T094]|18|ENSBTAG00000004379|ENSBTAT00000005747	125256	125759	110013	114182	118700	101220	87680.1	63161.9
ENSBTAP00000020878;ENSBTAP00000001099	9	9	407.7	0.0962739	1.20623	1;2	2	PWM	unstim	ERO1A_BOVIN|UniProtKB/Swiss-Prot|ERO1-like protein alpha [Source:UniProtKB/Swiss-Prot;Acc:A5PJN2]|10|ENSBTAG00000015716|ENSBTAT00000020878	228743	321333	241155	262429	346585	368060	257463	298852
ENSBTAP00000003865	3	3	106.23	0.0964083	1.20434	2;3	2	unstim	PWM	DNAJC13|EntrezGene|DnaJ (Hsp40) homolog, subfamily C, member 13 [Source:RefSeq peptide;Acc:NP_001107217]|1|ENSBTAG00000002966|ENSBTAT00000003865	38943.1	53660.9	49652.3	34152.2	35368.3	35791.6	46662.7	28654.5
ENSBTAP00000006219	3	3	149.02	0.0965446	1.17948	3	1	unstim	PWM	A6QR01_BOVIN|UniProtKB/TrEMBL|leucine-rich repeat-containing protein 47 [Source:RefSeq peptide;Acc:NP_001095768]|16|ENSBTAG00000004738|ENSBTAT00000006219	101416	68454.6	93301.4	105478	83936.2	70902.5	75655.7	82059.2
ENSBTAP00000002506	1	1	31.7	0.0966038	1.68377	3	1	unstim	PWM	RD23B_BOVIN|UniProtKB/Swiss-Prot|UV excision repair protein RAD23 homolog B [Source:UniProtKB/Swiss-Prot;Acc:Q29RK4]|8|ENSBTAG00000001926|ENSBTAT00000002506	4894.87	7575.51	7000	2901.69	1647.21	9034.01	1580.38	1025.27
ENSBTAP00000053145	1	1	27.16	0.0966989	3.30312	2	1	unstim	PWM	Q6QTH1_BOVIN|UniProtKB/TrEMBL|NADH dehydrogenase subunit 1 [Source:RefSeq peptide;Acc:YP_209205]|MT|ENSBTAG00000043558|ENSBTAT00000060571	16500.5	28109.8	4762.22	15766.4	2711.49	1114.46	1509.7	14384.8
ENSBTAP00000019260	1	1	47.02	0.0967298	7.40845	3	1	PWM	unstim	POF1B|HGNC Symbol|premature ovarian failure, 1B [Source:HGNC Symbol;Acc:13711]|X|ENSBTAG00000014485|ENSBTAT00000019260	81.5366	300.866	1622.67	237.621	63.2688	1261.56	14021.6	1268.39
ENSBTAP00000010568	1	1	25.96	0.0969107	1.50926	2	1	PWM	unstim	Q2KIC7_BOVIN|UniProtKB/TrEMBL|serine/threonine-protein phosphatase 6 catalytic subunit [Source:RefSeq peptide;Acc:NP_001124222]|11|ENSBTAG00000008033|ENSBTAT00000010568	2640.9	3368.99	10205.7	2824.85	4420.76	9209.56	11526.5	3580.16
ENSBTAP00000042130	34	30	1352.82	0.0971327	1.33113	2;3	2	unstim	PWM	DYNC1H1|HGNC Symbol|dynein, cytoplasmic 1, heavy chain 1 [Source:HGNC Symbol;Acc:2961]|21|ENSBTAG00000016598|ENSBTAT00000044652	1.07018e+06	1.1546e+06	892902	891626	752375	688234	944291	627062
ENSBTAP00000040793	3	3	154.33	0.0972552	1.3483	2;3	2	unstim	PWM	LASP1_BOVIN|UniProtKB/Swiss-Prot|LIM and SH3 domain protein 1 [Source:UniProtKB/Swiss-Prot;Acc:Q3B7M5]|19|ENSBTAG00000030587|ENSBTAT00000043205	195388	300376	297188	229214	207912	209426	203879	136899
ENSBTAP00000023441	3	3	125.2	0.0973374	1.38368	2;3	2	PWM	unstim	GFPT1|EntrezGene|glucosamine--fructose-6-phosphate aminotransferase [Source:RefSeq peptide;Acc:NP_001103431]|11|ENSBTAG00000017626|ENSBTAT00000023441	107176	97545.3	79568.1	87106.3	103895	151335	144175	114486
ENSBTAP00000026686	3	3	112.62	0.098077	1.87952	2;3	2	unstim	PWM	LYN|HGNC Symbol|v-yes-1 Yamaguchi sarcoma viral related oncogene homolog [Source:HGNC Symbol;Acc:6735]|14|ENSBTAG00000020034|ENSBTAT00000026686	83962.6	191646	111117	112642	99171.4	75760.9	47359.4	43396.7
ENSBTAP00000021268	5	5	430.53	0.0987845	1.32653	2;3	2	PWM	unstim	RS5_BOVIN|UniProtKB/Swiss-Prot|40S ribosomal protein S540S ribosomal protein S5, N-terminally processed [Source:UniProtKB/Swiss-Prot;Acc:Q5E988]|18|ENSBTAG00000015989|ENSBTAT00000021268	1.01054e+06	2.2843e+06	1.1972e+06	1.00641e+06	1.47603e+06	2.12008e+06	1.92895e+06	1.76877e+06
ENSBTAP00000001704	2	1	47.78	0.0989782	2.82848	1;3	2	unstim	PWM	TRFL_BOVIN|UniProtKB/Swiss-Prot|LactotransferrinLactoferricin-B [Source:UniProtKB/Swiss-Prot;Acc:P24627]|22|ENSBTAG00000001292|ENSBTAT00000001704	22638.3	23319.8	13002.7	5579.12	12132.1	2222.9	3991.14	4471.74
ENSBTAP00000019547;ENSBTAP00000055448	4	4	128.12	0.0989823	1.45387	2;3	2	PWM	unstim	HPRT_BOVIN|UniProtKB/Swiss-Prot|Hypoxanthine-guanine phosphoribosyltransferase [Source:UniProtKB/Swiss-Prot;Acc:Q3SZ18]|X|ENSBTAG00000014685|ENSBTAT00000019547	94670	155939	110376	135233	156721	267034	174303	123380
ENSBTAP00000023098	5	4	150.2	0.0989949	1.47815	3	1	unstim	PWM	LACTB_BOVIN|UniProtKB/Swiss-Prot|Serine beta-lactamase-like protein LACTB, mitochondrial [Source:UniProtKB/Swiss-Prot;Acc:P83095]|10|ENSBTAG00000017373|ENSBTAT00000023098	79327.3	101265	65417.1	82742.6	66921.7	49237.7	62222.7	44024.6
ENSBTAP00000003660	5	5	191.86	0.0994745	1.74603	2	1	PWM	unstim	Q17QI3_BOVIN|UniProtKB/TrEMBL|acetyl-CoA acetyltransferase, cytosolic [Source:RefSeq peptide;Acc:NP_001069017]|9|ENSBTAG00000002827|ENSBTAT00000003660	54372.4	69169.8	68133.4	87066.3	91762.7	190611	121668	82649.3
ENSBTAP00000018261	6	5	235.63	0.0995351	1.12756	1	1	PWM	unstim	F1MK44_BOVIN|UniProtKB/TrEMBL|integrin alpha-5 [Source:RefSeq peptide;Acc:NP_001159972]|5|ENSBTAG00000013745|ENSBTAT00000018261	178701	129748	183920	126157	203568	144641	184602	164615
ENSBTAP00000034425	5	5	255.59	0.0995713	1.26772	2	1	unstim	PWM	A7YY77_BOVIN|UniProtKB/TrEMBL|endonuclease domain-containing 1 protein [Source:RefSeq peptide;Acc:NP_001095989]|15|ENSBTAG00000024803|ENSBTAT00000034535	210261	151535	143020	215041	205557	127086	108543	126651
ENSBTAP00000054338	1	1	36.9	0.0997336	1.39642	1	1	unstim	PWM	A5PKB9_BOVIN|UniProtKB/TrEMBL|hypothetical protein LOC100125414 [Source:RefSeq peptide;Acc:NP_001098503]|25|ENSBTAG00000047448|ENSBTAT00000065695	19893.6	18240.4	36260.1	15896.5	12613.7	18578.2	20695.8	12770.7
ENSBTAP00000022442	1	1	43.64	0.0997769	1.60685	3	1	PWM	unstim	POLD3|EntrezGene|DNA polymerase delta subunit 3 [Source:RefSeq peptide;Acc:NP_001161376]|15|ENSBTAG00000016869|ENSBTAT00000022442	8701.8	7064.71	6728.38	8243.3	8067.8	16061	12341.8	12921.1
ENSBTAP00000028047	1	1	29.38	0.0998916	12.8209	3	1	PWM	unstim	FTSJ3|EntrezGene|putative rRNA methyltransferase 3 [Source:RefSeq peptide;Acc:NP_001068830]|19|ENSBTAG00000021060|ENSBTAT00000028047	617.885	0	277.684	2636.99	5989.55	9694.2	17697.4	11909.3
ENSBTAP00000007436	20	19	736.69	0.100242	1.33063	2;3	2	PWM	unstim	PSMD2_BOVIN|UniProtKB/Swiss-Prot|26S proteasome non-ATPase regulatory subunit 2 [Source:UniProtKB/Swiss-Prot;Acc:P56701]|1|ENSBTAG00000005660|ENSBTAT00000007436	811421	741906	600654	583474	779066	956317	922699	984457
ENSBTAP00000033789	1	1	31.49	0.10053	1.9492	3	1	unstim	PWM	POGZ|EntrezGene|pogo transposable element with ZNF domain [Source:RefSeq peptide;Acc:NP_001156662]|3|ENSBTAG00000021289|ENSBTAT00000033883	19464.3	23571.9	10504.5	20271	9406.99	10665	11797.6	5998.11
ENSBTAP00000026074	3	3	108.41	0.100807	1.09966	1	1	PWM	unstim	CD151_BOVIN|UniProtKB/Swiss-Prot|CD151 antigen [Source:UniProtKB/Swiss-Prot;Acc:Q3ZBH3]|29|ENSBTAG00000019569|ENSBTAT00000026074	63278.5	42352.1	39518.5	18948.9	61307.5	50105.8	46978.1	22060.3
ENSBTAP00000001754	3	3	102.04	0.100886	1.42145	3	1	unstim	PWM	CLPTM1L|EntrezGene|cleft lip and palate transmembrane protein 1-like protein [Source:RefSeq peptide;Acc:NP_001075895]|20|ENSBTAG00000001329|ENSBTAT00000001754	30072.4	21601.7	23375	29864.3	18481.5	10480.1	24967.4	19878.1
ENSBTAP00000000143	1	1	56.15	0.100925	1.48667	3	1	PWM	unstim	SENP3|HGNC Symbol|SUMO1/sentrin/SMT3 specific peptidase 3 [Source:HGNC Symbol;Acc:17862]|19|ENSBTAG00000000131|ENSBTAT00000000143	5598.38	8785.69	8734.8	3697.01	7989.61	8339.16	15600.5	7937.07
ENSBTAP00000008826	4	4	153.09	0.101136	2.47246	2;3	2	unstim	PWM	Q2TA22_BOVIN|UniProtKB/TrEMBL|long-chain-fatty-acid--CoA ligase 6 [Source:RefSeq peptide;Acc:NP_001033131]|7|ENSBTAG00000019708|ENSBTAT00000008826	84789.3	218615	136706	132293	107126	47826.1	31600.4	44959.6
ENSBTAP00000021759	5	5	216.98	0.101362	1.82771	1	1	unstim	PWM	VNN2|EntrezGene|vanin 2 [Source:RefSeq peptide;Acc:NP_001157392]|9|ENSBTAG00000016357|ENSBTAT00000021759	74187.7	81758.2	126793	71331.6	60697.2	70762.3	38289.5	23974.9
ENSBTAP00000025505	1	1	23.82	0.10138	1.13063	2	1	unstim	PWM	C56D2_BOVIN|UniProtKB/Swiss-Prot|Cytochrome b561 domain-containing protein 2 [Source:UniProtKB/Swiss-Prot;Acc:Q5E965]|22|ENSBTAG00000019163|ENSBTAT00000025505	4127.54	5887.35	5053.78	5195.1	4114.03	5476.55	4235.69	4096.25
ENSBTAP00000045061	1	1	33.94	0.101424	1.913	2	1	unstim	PWM	IFI30|EntrezGene|gamma-interferon-inducible lysosomal thiol reductase [Source:RefSeq peptide;Acc:NP_001094721]|7|ENSBTAG00000018349|ENSBTAT00000047907	4207.66	6247.05	4035.77	5716.61	4462.07	1455.93	1793.79	2851.27
ENSBTAP00000022034	7	7	558.98	0.101465	1.90459	1;2;3	3	PWM	unstim	HBA_BOVIN|UniProtKB/Swiss-Prot|Hemoglobin subunit alpha [Source:UniProtKB/Swiss-Prot;Acc:P01966]|25|ENSBTAG00000026417|ENSBTAT00000022034	1.93454e+08	1.14038e+07	1.50254e+07	3.36357e+07	3.28892e+08	4.21329e+07	7.81772e+07	3.3649e+07
ENSBTAP00000003333	12	12	673.73	0.101524	1.13632	2	1	PWM	unstim	A4FV12_BOVIN|UniProtKB/TrEMBL|SUMO-activating enzyme subunit 2 [Source:RefSeq peptide;Acc:NP_001076850]|18|ENSBTAG00000002573|ENSBTAT00000003333	557325	634682	679158	754814	629948	842151	707978	803869
ENSBTAP00000007283	2	1	121.78	0.102052	1.65914	3	1	unstim	PWM	CBX3|EntrezGene|chromobox protein homolog 3 [Source:RefSeq peptide;Acc:NP_001094668]|1|ENSBTAG00000005540|ENSBTAT00000007283	78452	132205	71107.7	80960.5	58550.3	88545.8	16824	54702.9
ENSBTAP00000008683	5	4	177.92	0.10226	1.35448	2;3	2	PWM	unstim	NUP93_BOVIN|UniProtKB/Swiss-Prot|Nuclear pore complex protein Nup93 [Source:UniProtKB/Swiss-Prot;Acc:A5PJZ5]|18|ENSBTAG00000006611|ENSBTAT00000008683	104967	109528	117317	99690.4	100288	143768	197028	143379
ENSBTAP00000003532	2	2	46.95	0.102569	1.31633	3	1	PWM	unstim	Q2KHX7_BOVIN|UniProtKB/TrEMBL|mRNA-capping enzyme [Source:RefSeq peptide;Acc:NP_001039550]|9|ENSBTAG00000002725|ENSBTAT00000003532	9058.31	7302.04	9168.25	8904.82	8980.56	10305.5	15309.9	10729.9
ENSBTAP00000008722	1	1	30.16	0.10298	1.46092	3	1	unstim	PWM	A0JN63_BOVIN|UniProtKB/TrEMBL|cleavage stimulation factor subunit 1 [Source:RefSeq peptide;Acc:NP_001071333]|13|ENSBTAG00000006639|ENSBTAT00000008722	17999	19849	8346.94	15206.3	8004.02	18213.3	7225.94	8585.94
ENSBTAP00000040728	4	4	217.15	0.102983	1.15688	2;3	2	PWM	unstim	ALDH16A1|EntrezGene|aldehyde dehydrogenase family 16 member A1 [Source:RefSeq peptide;Acc:NP_001095339]|18|ENSBTAG00000000330|ENSBTAT00000043139	69174.2	80038.6	105374	67414.8	67035.7	101487	122219	81775.9
ENSBTAP00000008107	5	3	183.2	0.103065	1.1819	1;2;3	3	PWM	unstim	PRDX4_BOVIN|UniProtKB/Swiss-Prot|Peroxiredoxin-4 [Source:UniProtKB/Swiss-Prot;Acc:Q9BGI2]|X|ENSBTAG00000006165|ENSBTAT00000008107	55222	127220	74027.4	72545.1	82785.5	125276	94380.2	86421.4
ENSBTAP00000013796	10	10	515.58	0.103108	1.26574	2;3	2	PWM	unstim	Q3ZBH5_BOVIN|UniProtKB/TrEMBL|proliferation-associated protein 2G4 [Source:RefSeq peptide;Acc:NP_001029871]|5|ENSBTAG00000010451|ENSBTAT00000013796	1.06335e+06	1.49036e+06	1.04943e+06	1.17292e+06	1.19588e+06	2.03499e+06	1.05601e+06	1.75838e+06
ENSBTAP00000021408	2	1	127.78	0.103133	1.55737	2	1	unstim	PWM	RAB8A_BOVIN|UniProtKB/Swiss-Prot|Ras-related protein Rab-8A [Source:UniProtKB/Swiss-Prot;Acc:A4FV54]|7|ENSBTAG00000038696|ENSBTAT00000021408	52263.9	145933	104274	95324.9	54090.1	70389.5	59802.8	71145.4
ENSBTAP00000024448;ENSBTAP00000005625;ENSBTAP00000014091	13	12	447.93	0.103227	1.62629	2;3	2	unstim	PWM	DPYL2_BOVIN|UniProtKB/Swiss-Prot|Dihydropyrimidinase-related protein 2 [Source:UniProtKB/Swiss-Prot;Acc:O02675]|8|ENSBTAG00000018373|ENSBTAT00000024448	470497	717675	477120	708492	539207	388385	199846	332195
ENSBTAP00000015985	1	1	44.38	0.103497	1.33849	2	1	PWM	unstim	CARM1|HGNC Symbol|coactivator-associated arginine methyltransferase 1 [Source:HGNC Symbol;Acc:23393]|7|ENSBTAG00000012048|ENSBTAT00000015985	16802.2	13532.4	14376.2	8788.99	16509.1	24202.2	19360.3	11537.4
ENSBTAP00000023150	3	2	215.39	0.10425	1.79179	2;3	2	PWM	unstim	C1JZ67_BOVIN|UniProtKB/TrEMBL|karyopherin alpha 4 (importin alpha 3) [Source:RefSeq peptide;Acc:NP_001152788]|1|ENSBTAG00000017416|ENSBTAT00000023150	47980.6	32321.2	42727.6	53505.8	72319.7	29839.1	97721.8	116434
ENSBTAP00000015769	24	23	1189.34	0.104264	1.19489	1;2;3	3	unstim	PWM	NNTM_BOVIN|UniProtKB/Swiss-Prot|NAD(P) transhydrogenase, mitochondrial [Source:UniProtKB/Swiss-Prot;Acc:P11024]|20|ENSBTAG00000011885|ENSBTAT00000015769	2.52653e+06	2.74499e+06	2.50842e+06	2.24049e+06	2.41696e+06	2.5973e+06	1.81479e+06	1.55705e+06
ENSBTAP00000029840	9	7	380.49	0.104423	1.2709	3	1	unstim	PWM	PLRG1_BOVIN|UniProtKB/Swiss-Prot|Pleiotropic regulator 1 [Source:UniProtKB/Swiss-Prot;Acc:Q2KID6]|17|ENSBTAG00000007234|ENSBTAT00000029844	316168	383767	248633	279125	231538	254509	261687	218270
ENSBTAP00000000526	1	1	31.2	0.104785	1.41064	3	1	unstim	PWM	CDC40|EntrezGene|pre-mRNA-processing factor 17 [Source:RefSeq peptide;Acc:NP_001069111]|9|ENSBTAG00000000409|ENSBTAT00000000526	13642.6	13523.3	13571.4	12515	7939.64	14744.8	8947.01	6119.03
ENSBTAP00000050205	1	1	55.36	0.104914	1.15483	2;3	2	unstim	PWM	OSTC_BOVIN|UniProtKB/Swiss-Prot|Oligosaccharyltransferase complex subunit OSTC [Source:UniProtKB/Swiss-Prot;Acc:Q2KID7]|6|ENSBTAG00000011611|ENSBTAT00000035535	62662.9	53080.4	70841.3	59929.8	62324.4	48458.7	52655.8	50025
ENSBTAP00000012108	7	5	323.46	0.104928	1.27806	2;3	2	PWM	unstim	PUR2_BOVIN|UniProtKB/Swiss-Prot|Trifunctional purine biosynthetic protein adenosine-3Phosphoribosylamine--glycine ligasePhosphoribosylformylglycinamidine cyclo-ligasePhosphoribosylglycinamide formyltransferase [Source:UniProtKB/Swiss-Prot;Acc:Q59A32	207598	228025	206413	200572	199632	278822	294647	303802
ENSBTAP00000006231	1	1	23.6	0.105044	1.24903	2;3	2	unstim	PWM	SPCS1_BOVIN|UniProtKB/Swiss-Prot|Signal peptidase complex subunit 1 [Source:UniProtKB/Swiss-Prot;Acc:Q3T134]|22|ENSBTAG00000004747|ENSBTAT00000006231	153203	349374	169735	165414	161875	268959	127580	112286
ENSBTAP00000010119	3	3	96.91	0.105188	1.5886	2;3	2	unstim	PWM	CASA1_BOVIN|UniProtKB/Swiss-Prot|Alpha-S1-caseinAntioxidant peptide [Source:UniProtKB/Swiss-Prot;Acc:P02662]|6|ENSBTAG00000007695|ENSBTAT00000010119	292522	228540	360218	165931	275240	76351.4	180635	126978
ENSBTAP00000022496	1	1	53.41	0.106307	1.30552	2;3	2	PWM	unstim	EFTS_BOVIN|UniProtKB/Swiss-Prot|Elongation factor Ts, mitochondrial [Source:UniProtKB/Swiss-Prot;Acc:P43896]|5|ENSBTAG00000016912|ENSBTAT00000022496	85205.6	81824.7	78902.1	64026.5	90286.4	133446	112035	68890.8
ENSBTAP00000024740	3	2	122.77	0.106434	1.93322	3	1	PWM	unstim	RFC2_BOVIN|UniProtKB/Swiss-Prot|Replication factor C subunit 2 [Source:UniProtKB/Swiss-Prot;Acc:Q05B83]|25|ENSBTAG00000018589|ENSBTAT00000024740	21294.8	17875.9	10666.9	17939.4	19088.2	36567.3	38207.9	37164.8
ENSBTAP00000047239	1	1	77.53	0.106538	1.7289	1	1	unstim	PWM	EMP1|HGNC Symbol|epithelial membrane protein 1 [Source:HGNC Symbol;Acc:3333]|5|ENSBTAG00000036078|ENSBTAT00000050559	134209	163990	169750	91710.4	95453.4	156506	42161.1	29588.5
ENSBTAP00000011148	4	3	218.58	0.106562	1.59881	3	1	unstim	PWM	CRNKL1|HGNC Symbol|crooked neck pre-mRNA splicing factor-like 1 (Drosophila) [Source:HGNC Symbol;Acc:15762]|13|ENSBTAG00000008472|ENSBTAT00000011148	68294	68856.5	42168.2	60176.1	37216.7	42170.4	46203.9	24205
ENSBTAP00000009435	1	1	33.37	0.106929	1.28331	1	1	unstim	PWM	SLC44A1|HGNC Symbol|solute carrier family 44, member 1 [Source:HGNC Symbol;Acc:18798]|8|ENSBTAG00000007163|ENSBTAT00000009435	20124.9	18647.9	18771.8	11870	16557	16298.3	10507	10728.1
ENSBTAP00000005982;ENSBTAP00000015186	3	2	114.89	0.107188	2.51693	2;3	2	unstim	PWM	A6QR15_BOVIN|UniProtKB/TrEMBL|tropomyosin alpha-4 chain [Source:RefSeq peptide;Acc:NP_001094632]|7|ENSBTAG00000004553|ENSBTAT00000005982	68216.1	210568	121878	57235.9	50829.7	41910.9	39500.8	49686.2
ENSBTAP00000019737	1	1	21.96	0.107356	1.57136	1	1	unstim	PWM	Q0V8M6_BOVIN|UniProtKB/TrEMBL|Y+L amino acid transporter 1 [Source:RefSeq peptide;Acc:NP_001068619]|10|ENSBTAG00000014821|ENSBTAT00000019737	8364.94	7456.06	4369.35	5951.08	9419.66	3899.04	1100.11	2217.38
ENSBTAP00000012724	4	4	115.29	0.107365	1.5865	2;3	2	unstim	PWM	PLEK|HGNC Symbol|pleckstrin [Source:HGNC Symbol;Acc:9070]|11|ENSBTAG00000009658|ENSBTAT00000012724	50657.9	94370.1	36530.3	39202.7	56795.5	43167.5	22512.4	16674.6
ENSBTAP00000007840	3	3	100.17	0.107535	1.29591	3	1	unstim	PWM	CF130_BOVIN|UniProtKB/Swiss-Prot|Uncharacterized protein C6orf130 homolog [Source:UniProtKB/Swiss-Prot;Acc:Q1LZ74]|23|ENSBTAG00000005975|ENSBTAT00000007840	74347.9	78894.2	95529.9	65681.3	62895	77922	54435.5	47398.8
ENSBTAP00000054191	1	1	96.93	0.108094	1.46484	2;3	2	unstim	PWM	A4FUC7_BOVIN|UniProtKB/TrEMBL|coiled-coil domain containing 127 [Source:RefSeq peptide;Acc:NP_001096788]|20|ENSBTAG00000047780|ENSBTAT00000066105	104662	45923.5	39887.7	57155.3	55326.8	39514.8	38969.2	35237.3
ENSBTAP00000027289	3	3	103.92	0.108424	1.34069	2	1	PWM	unstim	A5PKM3_BOVIN|UniProtKB/TrEMBL|serine palmitoyltransferase 2 [Source:RefSeq peptide;Acc:NP_001092551]|10|ENSBTAG00000020480|ENSBTAT00000027289	16055.6	40832.7	29582	27709.5	34695.3	44661.4	35638.1	38085
ENSBTAP00000000683	1	1	77.63	0.108611	2.63093	2;3	2	unstim	PWM	CSTB|EntrezGene|cystatin-B [Source:RefSeq peptide;Acc:NP_001032538]|1|ENSBTAG00000000524|ENSBTAT00000000683	68585.2	155880	140454	92347.7	89877.1	25216.8	27800.5	30909.8
ENSBTAP00000024514	18	12	726.19	0.108792	1.37006	2;3	2	PWM	unstim	F1MBQ8_BOVIN|UniProtKB/TrEMBL|Uncharacterized protein [Source:UniProtKB/TrEMBL;Acc:F1MBQ8]|19|ENSBTAG00000018423|ENSBTAT00000024514	866625	1.03235e+06	743430	945575	866941	1.38468e+06	1.42999e+06	1.23414e+06
ENSBTAP00000002131	1	1	39.27	0.109026	2.37225	2	1	PWM	unstim	A0JNE9_BOVIN|UniProtKB/TrEMBL|CTP synthase 1 [Source:RefSeq peptide;Acc:NP_001071326]|3|ENSBTAG00000001626|ENSBTAT00000002131	687.456	1145.88	1009.97	933.055	2064.07	963.746	2147.87	3782.76
ENSBTAP00000008111	3	2	124.88	0.109459	1.75255	3	1	PWM	unstim	Q3MHF0_BOVIN|UniProtKB/TrEMBL|RNA-binding protein 45 [Source:RefSeq peptide;Acc:NP_001124225]|2|ENSBTAG00000006168|ENSBTAT00000008111	38781.7	34665.2	45159.6	46863.5	54540.4	54643.7	131222	49589.5
ENSBTAP00000007772	1	1	20.41	0.10974	1.07418	1	1	unstim	PWM	PARD6G|EntrezGene|partitioning defective 6 homolog gamma [Source:RefSeq peptide;Acc:NP_001091569]|24|ENSBTAG00000005917|ENSBTAT00000007772	152761	160721	167012	153820	134867	146237	152232	157172
ENSBTAP00000021559	1	1	30.94	0.10987	1.18967	2	1	PWM	unstim	EPN4_BOVIN|UniProtKB/Swiss-Prot|Clathrin interactor 1 [Source:UniProtKB/Swiss-Prot;Acc:A7Z035]|7|ENSBTAG00000016199|ENSBTAT00000021559	1317.36	1099.9	2143.34	1393.01	1850.02	1482.96	2358.63	1391.21
ENSBTAP00000040521	13	13	574.09	0.110045	1.4139	2;3	2	unstim	PWM	F1N5H8_BOVIN|UniProtKB/TrEMBL|probable ATP-dependent RNA helicase DDX31 [Source:RefSeq peptide;Acc:NP_001095356]|11|ENSBTAG00000003530|ENSBTAT00000042916	1.56617e+06	1.61856e+06	1.28819e+06	1.43876e+06	1.03016e+06	877797	1.43409e+06	839071
ENSBTAP00000013079	9	1	468.3	0.110122	2.26559	2;3	2	PWM	unstim	RS3A_BOVIN|UniProtKB/Swiss-Prot|40S ribosomal protein S3a [Source:UniProtKB/Swiss-Prot;Acc:Q56JV9]|17|ENSBTAG00000009908|ENSBTAT00000013079	44540.1	44542.4	143773	47660.5	134683	81398.7	138734	280719
ENSBTAP00000014799	2	1	108.62	0.110257	1.82491	2;3	2	unstim	PWM	IMA1_BOVIN|UniProtKB/Swiss-Prot|Importin subunit alpha-1 [Source:UniProtKB/Swiss-Prot;Acc:A2VE08]|1|ENSBTAG00000011143|ENSBTAT00000014799	40062.7	35687.6	19542.4	32876.6	19869.7	15177.1	23324.8	11861.6
ENSBTAP00000027059;ENSBTAP00000003678;ENSBTAP00000017963	2	2	71.63	0.11028	1.20175	2	1	PWM	unstim	A5PK75_BOVIN|UniProtKB/TrEMBL|torsin-1A [Source:RefSeq peptide;Acc:NP_001092528]|11|ENSBTAG00000020305|ENSBTAT00000027059	20777.8	33436.4	24875.5	29106.5	32278.6	38201.6	29278.2	30266.5
ENSBTAP00000011038	1	1	44.75	0.110825	1.05863	1	1	unstim	PWM	CLPX|HGNC Symbol|ClpX caseinolytic peptidase X homolog (E. coli) [Source:HGNC Symbol;Acc:2088]|10|ENSBTAG00000008386|ENSBTAT00000011038	1.35207e+06	1.42736e+06	1.569e+06	1.40258e+06	1.25297e+06	1.31015e+06	1.43984e+06	1.42955e+06
ENSBTAP00000024092	19	17	1039.77	0.110997	1.42227	1;2;3	3	unstim	PWM	SAHH_BOVIN|UniProtKB/Swiss-Prot|Adenosylhomocysteinase [Source:UniProtKB/Swiss-Prot;Acc:Q3MHL4]|13|ENSBTAG00000018101|ENSBTAT00000024092	3.86585e+06	4.26687e+06	5.4354e+06	5.15523e+06	3.54826e+06	3.9503e+06	3.00624e+06	2.6596e+06
ENSBTAP00000026818	2	1	49.44	0.111795	1.81525	2	1	PWM	unstim	A5D7T5_BOVIN|UniProtKB/TrEMBL|serine/threonine-protein phosphatase 2B catalytic subunit gamma isoform [Source:RefSeq peptide;Acc:NP_001091545]|8|ENSBTAG00000020133|ENSBTAT00000026818	178832	13917.9	18540.2	34655	281818	46009.3	85011.5	33614.5
ENSBTAP00000027016	4	4	166.68	0.112613	1.18401	2;3	2	unstim	PWM	NFKB1|EntrezGene|nuclear factor NF-kappa-B p105 subunit [Source:RefSeq peptide;Acc:NP_001069877]|6|ENSBTAG00000020270|ENSBTAT00000027016	120811	172114	102230	171207	108753	149039	100005	120547
ENSBTAP00000055919;ENSBTAP00000040523	6	6	233.92	0.112792	1.27874	2;3	2	PWM	unstim	PPP6R1|EntrezGene|serine/threonine-protein phosphatase 6 regulatory subunit 1 [Source:RefSeq peptide;Acc:NP_001107979]|18|ENSBTAG00000021157|ENSBTAT00000066016	103891	62792.4	107419	96498.7	98419.6	90478.9	165298	119707
ENSBTAP00000007189	5	5	222.7	0.112827	1.16671	2;3	2	unstim	PWM	NDUA9_BOVIN|UniProtKB/Swiss-Prot|NADH dehydrogenase [ubiquinone] 1 alpha subcomplex subunit 9, mitochondrial [Source:UniProtKB/Swiss-Prot;Acc:P34943]|5|ENSBTAG00000005465|ENSBTAT00000007189	164646	187609	115489	156085	145684	142656	118534	127817
ENSBTAP00000020797	1	1	50.01	0.112831	2.13791	3	1	PWM	unstim	CIAO1_BOVIN|UniProtKB/Swiss-Prot|Probable cytosolic iron-sulfur protein assembly protein CIAO1 [Source:UniProtKB/Swiss-Prot;Acc:Q32PJ6]|11|ENSBTAG00000015659|ENSBTAT00000020797	991.348	443.036	5446.06	1076.58	3582.58	2474.65	3839.62	7114.59
ENSBTAP00000023680	10	9	343.32	0.112886	1.56904	3	1	unstim	PWM	PDS5A|HGNC Symbol|PDS5, regulator of cohesion maintenance, homolog A (S. cerevisiae) [Source:HGNC Symbol;Acc:29088]|6|ENSBTAG00000017809|ENSBTAT00000023680	385348	485597	298680	330816	207534	230056	350518	168171
ENSBTAP00000020990	1	1	35.93	0.113097	1.64313	2	1	PWM	unstim	SGMR1_BOVIN|UniProtKB/Swiss-Prot|Sigma non-opioid intracellular receptor 1 [Source:UniProtKB/Swiss-Prot;Acc:Q58DH7]|8|ENSBTAG00000015804|ENSBTAT00000020990	1004.38	4402.58	1603.09	6170.8	1425.94	4208.8	4250.29	11772.8
ENSBTAP00000025880	1	1	58.34	0.113167	3.70183	1	1	unstim	PWM	A0JN72_BOVIN|UniProtKB/TrEMBL|C-C chemokine receptor type 1 [Source:RefSeq peptide;Acc:NP_001071307]|22|ENSBTAG00000019428|ENSBTAT00000025880	18533.4	20580.3	30576.7	33735.2	7494.27	11474	8277.31	693.454
ENSBTAP00000026008	2	2	48.59	0.11335	1.85048	1	1	unstim	PWM	F1N6B8_BOVIN|UniProtKB/TrEMBL|integrin alpha-D [Source:RefSeq peptide;Acc:NP_001095966]|25|ENSBTAG00000019524|ENSBTAT00000026008	30365	28317.1	25833.4	36329.9	28442.2	20436.7	8695.15	7731
ENSBTAP00000020166	3	3	116.87	0.113444	1.0751	1;3	2	unstim	PWM	PLD4|HGNC Symbol|phospholipase D family, member 4 [Source:HGNC Symbol;Acc:23792]|21|ENSBTAG00000015160|ENSBTAT00000020166	82515.4	97019.9	63056.4	41402.2	78273.3	87604.8	56329.8	41947
ENSBTAP00000035745	1	1	42.73	0.113618	1.59088	2	1	unstim	PWM	MGC126945|EntrezGene|hypothetical protein LOC767904 [Source:RefSeq peptide;Acc:NP_001070451]|23|ENSBTAG00000008959|ENSBTAT00000035878	52699.3	25409.2	48924.5	80650.7	40212.5	26452.2	27029.4	36852.2
ENSBTAP00000025685	6	6	233.08	0.11438	1.17409	1	1	PWM	unstim	ITGA2|EntrezGene|integrin alpha-2 [Source:RefSeq peptide;Acc:NP_001159971]|20|ENSBTAG00000019289|ENSBTAT00000025685	107520	85316	68920.5	72555.1	105227	96169.5	89979.8	101136
ENSBTAP00000019460	18	17	710.47	0.114386	1.26984	2;3	2	unstim	PWM	|||20|ENSBTAG00000014612|ENSBTAT00000019460	734331	662497	804788	609293	472238	404808	855206	481347
ENSBTAP00000011597	1	1	34.37	0.114405	1.58936	2;3	2	PWM	unstim	E1BA24_BOVIN|UniProtKB/TrEMBL|Uncharacterized protein [Source:UniProtKB/TrEMBL;Acc:E1BD67]|15|ENSBTAG00000008804|ENSBTAT00000011597	6099.07	8370.99	5819.26	6152.11	7321.81	8518.01	12855.7	13329.4
ENSBTAP00000019595	1	1	27.74	0.114798	1.56818	1	1	PWM	unstim	CD27|EntrezGene|CD27 antigen [Source:RefSeq peptide;Acc:NP_001075903]|5|ENSBTAG00000014725|ENSBTAT00000019595	11798.2	20001	21463.7	17211.7	10442.1	36694.9	33178.3	30201.8
ENSBTAP00000017175	1	1	22.88	0.114855	1.57221	2	1	unstim	PWM	TM6SF1|EntrezGene|transmembrane 6 superfamily member 1 [Source:RefSeq peptide;Acc:NP_001095765]|21|ENSBTAG00000012926|ENSBTAT00000017175	15841.1	32329.5	17742.1	20146.8	7674.45	12911.7	12839.6	21312.2
ENSBTAP00000029307	1	1	41.03	0.114988	2.97064	2;3	2	unstim	PWM	A6QLQ6_BOVIN|UniProtKB/TrEMBL|beta-parvin [Source:RefSeq peptide;Acc:NP_001095769]|5|ENSBTAG00000021978|ENSBTAT00000029307	14333.4	6189.16	6007.07	2362.41	4703.09	395.014	2593.09	2034.66
ENSBTAP00000029088	15	8	641.31	0.115011	1.18996	2;3	2	PWM	unstim	Q5E970_BOVIN|UniProtKB/TrEMBL|ATP-dependent RNA helicase DDX39 [Source:RefSeq peptide;Acc:NP_001029924]|7|ENSBTAG00000021820|ENSBTAT00000029088	686426	813109	533528	863146	737423	1.00164e+06	804295	903015
ENSBTAP00000022240	1	1	35.62	0.115301	4.97461	3	1	PWM	unstim	NOL9_BOVIN|UniProtKB/Swiss-Prot|Polynucleotide 5'-hydroxyl-kinase NOL9 [Source:UniProtKB/Swiss-Prot;Acc:E1BPN0]|16|ENSBTAG00000016733|ENSBTAT00000022240	1625.59	0	1005.7	459.201	1561.87	74.2754	10922.6	2815.24
ENSBTAP00000010806	3	3	98.98	0.115491	1.10658	1	1	PWM	unstim	NPTN|EntrezGene|neuroplastin [Source:RefSeq peptide;Acc:NP_001069667]|10|ENSBTAG00000008218|ENSBTAT00000010806	391476	478836	433493	244471	436462	551706	422731	302393
ENSBTAP00000013466;ENSBTAP00000056310	2	2	76.54	0.115498	1.25635	2	1	PWM	unstim	A5D9G1_BOVIN|UniProtKB/TrEMBL|UDP-N-acetylhexosamine pyrophosphorylase [Source:RefSeq peptide;Acc:NP_001039869]|3|ENSBTAG00000010206|ENSBTAT00000013466	18744.2	25189.2	25769.7	26810.3	28541.5	32686	34960	25067.5
ENSBTAP00000023209	1	1	24.64	0.115928	1.88896	2	1	unstim	PWM	B2DG18_BOVIN|UniProtKB/TrEMBL|monocarboxylate transporter 4 [Source:RefSeq peptide;Acc:NP_001103450]|19|ENSBTAG00000017461|ENSBTAT00000023209	3351.56	9752.21	5614.3	5906.4	4079.41	3637.43	2765.94	2553.2
ENSBTAP00000016093	14	11	886.36	0.116091	1.40448	2;3	2	unstim	PWM	GDIA_BOVIN|UniProtKB/Swiss-Prot|Rab GDP dissociation inhibitor alpha [Source:UniProtKB/Swiss-Prot;Acc:P21856]|X|ENSBTAG00000012125|ENSBTAT00000016093	819154	1.2132e+06	1.05214e+06	1.2453e+06	900968	787778	722983	671104
ENSBTAP00000025884	7	7	236.44	0.116317	1.29718	1;2	2	PWM	unstim	ICAM2|HGNC Symbol|intercellular adhesion molecule 2 [Source:HGNC Symbol;Acc:5345]|19|ENSBTAG00000019432|ENSBTAT00000025884	870307	955691	1.02072e+06	782047	1.09574e+06	1.63315e+06	1.02018e+06	958082
ENSBTAP00000009744	1	1	32.1	0.117182	1.54177	1	1	unstim	PWM	||Uncharacterized protein [Source:UniProtKB/TrEMBL;Acc:E1BBK2]|19|ENSBTAG00000007409|ENSBTAT00000009744	8553.87	7454.27	10757.9	6964.53	6889.1	7469.22	4561.68	2957.86
ENSBTAP00000028199;ENSBTAP00000021729	7	7	279.51	0.117868	1.76181	3	1	PWM	unstim	A7MB41_BOVIN|UniProtKB/TrEMBL|DNA-binding protein SATB1 [Source:RefSeq peptide;Acc:NP_001095510]|1|ENSBTAG00000021158|ENSBTAT00000028199	133059	85192.3	113755	119289	138096	175962	332295	148741
ENSBTAP00000052192	1	1	52.62	0.118961	2.21918	3	1	PWM	unstim	TFAM|EntrezGene|transcription factor A, mitochondrial precursor [Source:RefSeq peptide;Acc:NP_001029188]|28|ENSBTAG00000003546|ENSBTAT00000052511	18035.1	1434.66	9898.6	24886	35981.5	23039.8	30128.9	31250.3
ENSBTAP00000037356	2	2	129.12	0.119538	3.60488	3	1	PWM	unstim	A7E374_BOVIN|UniProtKB/TrEMBL|Uncharacterized protein [Source:UniProtKB/TrEMBL;Acc:F1MI03]|25|ENSBTAG00000012683|ENSBTAT00000037527	6731.79	2207.47	7633.06	17432.9	13665	54427.2	31937.3	22555.2
ENSBTAP00000025484	2	2	146.08	0.11967	1.30713	3	1	PWM	unstim	RS20_BOVIN|UniProtKB/Swiss-Prot|40S ribosomal protein S20 [Source:UniProtKB/Swiss-Prot;Acc:Q3ZBH8]|14|ENSBTAG00000019147|ENSBTAT00000025484	293629	388086	137504	273223	330577	478409	290780	328197
ENSBTAP00000039416	1	1	23.39	0.119723	1.67572	3	1	unstim	PWM	COMMD8|HGNC Symbol|COMM domain containing 8 [Source:HGNC Symbol;Acc:26036]|6|ENSBTAG00000001348|ENSBTAT00000039626	2585.65	6108.16	4580.94	2229.61	1624.56	4227.54	1328.52	2071.74
ENSBTAP00000028016	4	4	182.31	0.119793	1.34909	3	1	unstim	PWM	CATK_BOVIN|UniProtKB/Swiss-Prot|Cathepsin K [Source:UniProtKB/Swiss-Prot;Acc:Q5E968]|3|ENSBTAG00000021035|ENSBTAT00000028016	361437	175180	167874	135801	431296	81017.5	46300.3	64246.8
ENSBTAP00000025185	1	1	83.49	0.119895	1.66459	3	1	PWM	unstim	EXOS3_BOVIN|UniProtKB/Swiss-Prot|Exosome complex component RRP40 [Source:UniProtKB/Swiss-Prot;Acc:Q3T0E1]|8|ENSBTAG00000018925|ENSBTAT00000025185	15086.2	5282.22	30608.4	14262.1	24512.4	21618	28530.3	33935.6
ENSBTAP00000005837	3	3	109.3	0.12005	1.20392	1;2	2	unstim	PWM	IPO9|EntrezGene|importin-9 [Source:RefSeq peptide;Acc:NP_001098846]|16|ENSBTAG00000004452|ENSBTAT00000005837	131042	99541.3	150538	134810	103414	104789	108285	112055
ENSBTAP00000017825	7	1	463.48	0.120265	4.07601	1;2;3	3	PWM	unstim	E1B7J1_BOVIN|UniProtKB/TrEMBL|Elongation factor 1-alpha [Source:UniProtKB/TrEMBL;Acc:E1B7J1]|29|ENSBTAG00000013398|ENSBTAT00000017825	9936.62	19511.4	5421.05	51110.2	47257.3	13438.7	64433	225323
ENSBTAP00000017122	8	8	399.74	0.120469	1.16446	2;3	2	unstim	PWM	THIL_BOVIN|UniProtKB/Swiss-Prot|Acetyl-CoA acetyltransferase, mitochondrial [Source:UniProtKB/Swiss-Prot;Acc:Q29RZ0]|15|ENSBTAG00000012885|ENSBTAT00000017122	301192	413763	350967	482004	311311	358543	296252	363204
ENSBTAP00000009073	4	3	110.63	0.120535	2.51633	2	1	unstim	PWM	ASGL1_BOVIN|UniProtKB/Swiss-Prot|L-asparaginase [Source:UniProtKB/Swiss-Prot;Acc:Q32LE5]|29|ENSBTAG00000006910|ENSBTAT00000009073	52290.4	90942.2	74398.5	90275.7	81387.2	22270.1	8632.01	10074
ENSBTAP00000047927;ENSBTAP00000007817	17	15	908.19	0.120733	1.44768	1;2	2	PWM	unstim	Q58DL4_BOVIN|UniProtKB/TrEMBL|exportin-2 [Source:RefSeq peptide;Acc:NP_001014933]|13|ENSBTAG00000005957|ENSBTAT00000057219	621631	594488	623228	622515	559258	1.11451e+06	901625	988609
ENSBTAP00000010906	1	1	43.96	0.120981	2.71813	3	1	PWM	unstim	YLPM1|HGNC Symbol|YLP motif containing 1 [Source:HGNC Symbol;Acc:17798]|10|ENSBTAG00000008287|ENSBTAT00000010906	3113.5	1206.25	4779	6042.65	8567.26	16269	7400.65	8919.45
ENSBTAP00000013402;ENSBTAP00000049611	4	4	165.66	0.121314	1.58131	2;3	2	PWM	unstim	TCTP_BOVIN|UniProtKB/Swiss-Prot|Translationally-controlled tumor protein [Source:UniProtKB/Swiss-Prot;Acc:Q5E984]|12|ENSBTAG00000010156|ENSBTAT00000013402	78365.9	144172	174115	133790	168170	335587	176286	158749
ENSBTAP00000033176	4	4	109.97	0.12136	1.20169	2;3	2	unstim	PWM	INPP5B|HGNC Symbol|inositol polyphosphate-5-phosphatase, 75kDa [Source:HGNC Symbol;Acc:6077]|3|ENSBTAG00000024107|ENSBTAT00000033256	104813	92692.6	110499	79727	71334	95519	87295	68506.6
ENSBTAP00000040053	1	1	40.65	0.121472	1.76221	3	1	unstim	PWM	A4IFN6_BOVIN|UniProtKB/TrEMBL|sorting nexin-18 [Source:RefSeq peptide;Acc:NP_001077200]|20|ENSBTAG00000027924|ENSBTAT00000040276	21560.6	34724.1	32386	19975	17858.4	11425.7	13282	19087
ENSBTAP00000022558	27	26	1290.29	0.122037	1.13991	1;2	2	PWM	unstim	A6QNJ8_BOVIN|UniProtKB/TrEMBL|Uncharacterized protein [Source:UniProtKB/TrEMBL;Acc:F1N6Y1]|29|ENSBTAG00000016956|ENSBTAT00000022558	2.1872e+06	3.31527e+06	2.38478e+06	2.08681e+06	2.76883e+06	3.79378e+06	2.28841e+06	2.51856e+06
ENSBTAP00000001767	2	1	45.75	0.122358	2.06939	3	1	PWM	unstim	RLP24_BOVIN|UniProtKB/Swiss-Prot|Probable ribosome biogenesis protein RLP24 [Source:UniProtKB/Swiss-Prot;Acc:Q3SZ12]|10|ENSBTAG00000001342|ENSBTAT00000001767	12153.1	8279.84	4102.04	8393.62	12681.9	21518.7	21705	12236.5
ENSBTAP00000014882	1	1	29.47	0.122608	2.04255	1	1	PWM	unstim	GALT1_BOVIN|UniProtKB/Swiss-Prot|Polypeptide N-acetylgalactosaminyltransferase 1Polypeptide N-acetylgalactosaminyltransferase 1 soluble form [Source:UniProtKB/Swiss-Prot;Acc:Q07537]|24|ENSBTAG00000011206|ENSBTAT00000014882	1113.76	6976.41	0	0	4247.3	9791.85	1798.39	687.049
ENSBTAP00000039940	1	1	40.6	0.123751	2.14046	2	1	unstim	PWM	Q3SZT2_BOVIN|UniProtKB/TrEMBL|ribosyldihydronicotinamide dehydrogenase [Source:RefSeq peptide;Acc:NP_001029495]|23|ENSBTAG00000000786|ENSBTAT00000040161	19800.5	73552.8	75088.4	38740.3	25460.6	33456.7	23757	14119
ENSBTAP00000036813;ENSBTAP00000046814	6	4	250.26	0.12412	1.15095	1;2	2	PWM	unstim	|||12|ENSBTAG00000026070|ENSBTAT00000036965	482956	58701.1	53728.4	137491	536074	89616.5	81678.4	136132
ENSBTAP00000009911	2	2	77.51	0.124688	2.20005	2;3	2	unstim	PWM	Q2HJA6_BOVIN|UniProtKB/TrEMBL|neutrophil cytosol factor 4 [Source:RefSeq peptide;Acc:NP_001039448]|5|ENSBTAG00000007531|ENSBTAT00000009911	19131.5	24781.4	15054.5	25018.4	24649.6	3378.32	6570.89	3575.57
ENSBTAP00000048179	5	1	182.04	0.124787	7.44568	3	1	PWM	unstim	A6QQ28_BOVIN|UniProtKB/TrEMBL|histone H2B [Source:RefSeq peptide;Acc:NP_001099113]|23|ENSBTAG00000031769|ENSBTAT00000053239	330.029	330.058	3413.09	148.079	3019.44	198.613	22931.6	5280.47
ENSBTAP00000024017	1	1	35.56	0.124871	1.39617	2	1	unstim	PWM	ACDSB_BOVIN|UniProtKB/Swiss-Prot|Short/branched chain specific acyl-CoA dehydrogenase, mitochondrial [Source:UniProtKB/Swiss-Prot;Acc:Q5EAD4]|26|ENSBTAG00000018041|ENSBTAT00000024017	8038.8	7035.81	2059.63	8265.23	7369.94	2746.42	1464.76	6611.08
ENSBTAP00000018916	8	8	321.04	0.125107	1.27902	3	1	PWM	unstim	VRK1|EntrezGene|serine/threonine-protein kinase VRK1 [Source:RefSeq peptide;Acc:NP_001033313]|21|ENSBTAG00000014230|ENSBTAT00000018916	333696	472919	271953	340300	347327	549772	490994	426661
ENSBTAP00000001113	16	15	962.11	0.125387	1.19046	2;3	2	PWM	unstim	PARP1|EntrezGene|poly [Source:RefSeq peptide;Acc:NP_777176]|16|ENSBTAG00000000837|ENSBTAT00000001113	1.85155e+06	2.03212e+06	1.57342e+06	2.25122e+06	2.24978e+06	2.47733e+06	2.2929e+06	2.15641e+06
ENSBTAP00000005672	12	12	643.65	0.12671	1.05746	2;3	2	PWM	unstim	COPA|EntrezGene|coatomer subunit alpha [Source:RefSeq peptide;Acc:NP_001099115]|3|ENSBTAG00000004333|ENSBTAT00000005672	761621	760208	863836	758826	775626	846149	942767	760642
ENSBTAP00000019298;ENSBTAP00000023649;ENSBTAP00000054016;ENSBTAP00000054646;ENSBTAP00000055456	8	1	508.74	0.12685	1.16743	2;3	2	PWM	unstim	RL9_BOVIN|UniProtKB/Swiss-Prot|60S ribosomal protein L9 [Source:UniProtKB/Swiss-Prot;Acc:Q3SYR7]|6|ENSBTAG00000014518|ENSBTAT00000019298	97871.2	289467	78862	105019	143734	260579	110832	151714
ENSBTAP00000042872	12	12	627.07	0.126971	1.55256	3	1	PWM	unstim	|||2|ENSBTAG00000015077|ENSBTAT00000045489	581610	714749	396025	589428	656272	881097	1.13704e+06	868255
ENSBTAP00000025447	1	1	40.43	0.127429	1.63292	2;3	2	unstim	PWM	A4FUE6_BOVIN|UniProtKB/TrEMBL|mps one binder kinase activator-like 3 [Source:RefSeq peptide;Acc:NP_001076995]|2|ENSBTAG00000019116|ENSBTAT00000025447	49706	10814.8	28545.4	46064.1	33180.7	10162.6	22480.9	16929.6
ENSBTAP00000018435	2	2	103.36	0.127551	2.21387	3	1	unstim	PWM	A6QPH2_BOVIN|UniProtKB/TrEMBL|signal-induced proliferation-associated protein 1 [Source:RefSeq peptide;Acc:NP_001095365]|29|ENSBTAG00000013884|ENSBTAT00000018435	51512.4	75077.4	20905.4	52703	17348.7	24919.3	28445.9	19715.4
ENSBTAP00000013167	3	3	88.98	0.127963	1.47168	3	1	unstim	PWM	SIN3A|HGNC Symbol|SIN3 transcription regulator homolog A (yeast) [Source:HGNC Symbol;Acc:19353]|21|ENSBTAG00000009985|ENSBTAT00000013167	83745	53456.1	63509.3	46220.6	37372	28430.6	76633	25352.6
ENSBTAP00000000950	2	2	65.18	0.128377	3.64796	2	1	unstim	PWM	NDRG1|EntrezGene|protein NDRG1 [Source:RefSeq peptide;Acc:NP_001030181]|14|ENSBTAG00000000711|ENSBTAT00000000950	7168.09	27043	11229.8	13402.2	8621.69	1195.72	3350.89	2962.09
ENSBTAP00000020908	1	1	48.1	0.128401	1.29625	2	1	PWM	unstim	SYNJ2BP|EntrezGene|synaptojanin-2-binding protein [Source:RefSeq peptide;Acc:NP_001030432]|10|ENSBTAG00000007586|ENSBTAT00000020908	24519.7	38325.4	27982.8	33815.3	41676.8	50467.6	37977.6	31447
ENSBTAP00000040769	6	4	171.64	0.128817	1.37395	3	1	unstim	PWM	Q1JPJ7_BOVIN|UniProtKB/TrEMBL|Uncharacterized protein [Source:UniProtKB/TrEMBL;Acc:E1BMW2]|18|ENSBTAG00000019180|ENSBTAT00000043179	117563	132402	83400	119298	93438.6	71666.8	89307.9	75047.8
ENSBTAP00000017968	4	4	248.09	0.128878	1.3644	2;3	2	unstim	PWM	VATC1_BOVIN|UniProtKB/Swiss-Prot|V-type proton ATPase subunit C 1 [Source:UniProtKB/Swiss-Prot;Acc:P21282]|14|ENSBTAG00000013513|ENSBTAT00000017968	116068	157490	106708	125286	94599.1	74070.1	84910.8	116951
ENSBTAP00000037201	9	9	336	0.129664	1.15372	1;2;3	3	unstim	PWM	A6QQP5_BOVIN|UniProtKB/TrEMBL|leukosialin [Source:RefSeq peptide;Acc:NP_001096572]|25|ENSBTAG00000026326|ENSBTAT00000037368	1.23407e+06	1.27341e+06	1.69493e+06	1.17201e+06	883069	1.29202e+06	1.43878e+06	1.04448e+06
ENSBTAP00000012497	14	1	600.99	0.12971	1.26869	2;3	2	PWM	unstim	STAT5B|EntrezGene|signal transducer and activator of transcription 5B [Source:RefSeq peptide;Acc:NP_777042]|19|ENSBTAG00000010125|ENSBTAT00000012497	46784.9	35959.7	52817.3	38479.1	43694.9	58170.3	69002.6	49936.3
ENSBTAP00000038993;ENSBTAP00000004537	11	9	397.57	0.129756	1.33463	2;3	2	unstim	PWM	Q5EAA6_BOVIN|UniProtKB/TrEMBL|engulfment and cell motility 1 isoform 1 [Source:RefSeq peptide;Acc:NP_001106698]|4|ENSBTAG00000003490|ENSBTAT00000039193	425160	457549	422166	371868	234185	275862	466863	279426
ENSBTAP00000017527	1	1	30.52	0.129898	14.3575	1	1	PWM	unstim	Q28090_BOVIN|UniProtKB/TrEMBL|cytotoxic T-lymphocyte protein 4 [Source:RefSeq peptide;Acc:NP_776722]|2|ENSBTAG00000013170|ENSBTAT00000017527	91.3154	681.489	0	0	97.1242	3981.06	6558.07	459.309
ENSBTAP00000006990;ENSBTAP00000019214	4	2	284.5	0.129928	1.3263	2;3	2	PWM	unstim	F1MKZ5_BOVIN|UniProtKB/TrEMBL|40S ribosomal protein S6 [Source:RefSeq peptide;Acc:NP_001015548]|2|ENSBTAG00000005315|ENSBTAT00000006990	603340	645615	348771	842396	701564	816162	766146	952467
ENSBTAP00000008891	1	1	32.61	0.129988	3.74614	2	1	unstim	PWM	EHBP1L1|HGNC Symbol|EH domain binding protein 1-like 1 [Source:HGNC Symbol;Acc:30682]|29|ENSBTAG00000009554|ENSBTAT00000008891	4005.36	6984.13	3186.79	4547.1	2262.8	99.3536	1033.07	1602.82
ENSBTAP00000007150	5	4	217.23	0.130056	1.92159	2;3	2	unstim	PWM	CAPG_BOVIN|UniProtKB/Swiss-Prot|Macrophage-capping protein [Source:UniProtKB/Swiss-Prot;Acc:Q865V6]|11|ENSBTAG00000005432|ENSBTAT00000007150	172971	300312	195777	270060	209358	150369	73829.8	55162.3
ENSBTAP00000000596;ENSBTAP00000012182	6	5	240.63	0.13018	1.19819	2;3	2	PWM	unstim	PP2AA_BOVIN|UniProtKB/Swiss-Prot|Serine/threonine-protein phosphatase 2A catalytic subunit alpha isoform [Source:UniProtKB/Swiss-Prot;Acc:P67774]|7|ENSBTAG00000000469|ENSBTAT00000000596	958670	1.08458e+06	768774	467610	1.32301e+06	1.30114e+06	843055	462407
ENSBTAP00000021569	2	2	122.89	0.130286	4.179	2	1	PWM	unstim	TGM2|EntrezGene|protein-glutamine gamma-glutamyltransferase 2 [Source:RefSeq peptide;Acc:NP_803473]|13|ENSBTAG00000016208|ENSBTAT00000021569	5470.17	11833	9421.72	6260.23	83608	17349	12118.6	24769.1
ENSBTAP00000055564	6	6	498.96	0.13089	1.1426	2;3	2	unstim	PWM	RNH1|EntrezGene|ribonuclease inhibitor [Source:RefSeq peptide;Acc:NP_001030396]|GJ060032.1|ENSBTAG00000046869|ENSBTAT00000065344	734480	914257	686522	747213	691973	691716	687124	626962
ENSBTAP00000013170	3	3	88.18	0.130962	1.62774	3	1	unstim	PWM	SNF5_BOVIN|UniProtKB/Swiss-Prot|SWI/SNF-related matrix-associated actin-dependent regulator of chromatin subfamily B member 1 [Source:UniProtKB/Swiss-Prot;Acc:Q5BIN2]|17|ENSBTAG00000009988|ENSBTAT00000013170	95235	102267	57627.8	72072.8	42020.9	48858.4	71170.9	38967
ENSBTAP00000030517	1	1	21.57	0.131271	1.13244	1	1	PWM	unstim	CLEC1B|HGNC Symbol|C-type lectin domain family 1, member B [Source:HGNC Symbol;Acc:24356]|5|ENSBTAG00000030423|ENSBTAT00000030538	7696.15	14441	7738.87	12338.6	8302.38	17024.3	7538.74	14940.2
ENSBTAP00000002604	1	1	43.59	0.131767	1.53867	2	1	unstim	PWM	A6QLN5_BOVIN|UniProtKB/TrEMBL|phosphatidylinositol 4-kinase type 2-alpha [Source:RefSeq peptide;Acc:NP_001093786]|26|ENSBTAG00000002010|ENSBTAT00000002604	11304.1	10615.7	10753.6	9219.16	11525	6325.93	3184.85	6190.67
ENSBTAP00000018778	1	1	25.49	0.133035	1.19832	2	1	unstim	PWM	COX6C_BOVIN|UniProtKB/Swiss-Prot|Cytochrome c oxidase subunit 6C [Source:UniProtKB/Swiss-Prot;Acc:P04038]|14|ENSBTAG00000014130|ENSBTAT00000018778	147661	213822	152640	149934	147747	199711	103187	103514
ENSBTAP00000027627;ENSBTAP00000050800;ENSBTAP00000052821;ENSBTAP00000056582	8	2	370.5	0.133313	1.67358	2;3	2	PWM	unstim	RS15A_BOVIN|UniProtKB/Swiss-Prot|40S ribosomal protein S15a [Source:UniProtKB/Swiss-Prot;Acc:Q76I82]|25|ENSBTAG00000020733|ENSBTAT00000027627	339232	392694	742431	300077	570449	549610	769166	1.08043e+06
ENSBTAP00000003613	1	1	31.98	0.133993	1.45967	2	1	unstim	PWM	RB27B_BOVIN|UniProtKB/Swiss-Prot|Ras-related protein Rab-27B [Source:UniProtKB/Swiss-Prot;Acc:Q8HZJ5]|24|ENSBTAG00000002788|ENSBTAT00000003613	10263.1	10080.1	6444.78	5557.38	7180.49	4244.32	6477.9	4256.6
ENSBTAP00000004124	1	1	41.26	0.134095	1.46745	1	1	unstim	PWM	A7YW22_BOVIN|UniProtKB/TrEMBL|junctional adhesion molecule C [Source:RefSeq peptide;Acc:NP_001098834]|29|ENSBTAG00000003176|ENSBTAT00000004124	29436.5	27487.7	32079	45846.5	29635.3	22232.7	12713.8	27311.8
ENSBTAP00000056043	2	1	33.67	0.134253	1.96509	2	1	unstim	PWM	ASXL3|HGNC Symbol|additional sex combs like 3 (Drosophila) [Source:HGNC Symbol;Acc:29357]|24|ENSBTAG00000047003|ENSBTAT00000064050	585974	217629	579006	430729	279112	286858	206854	149952
ENSBTAP00000002124	7	1	335.32	0.134256	1.58703	2;3	2	PWM	unstim	A5PK20_BOVIN|UniProtKB/TrEMBL|histone cluster 1, H1e [Source:RefSeq peptide;Acc:NP_001092459]|23|ENSBTAG00000031774|ENSBTAT00000002124	287578	128210	72623	336364	377450	279264	303509	348716
ENSBTAP00000013354	6	5	202.48	0.134463	1.34995	1	1	unstim	PWM	APOE|EntrezGene|apolipoprotein E precursor [Source:RefSeq peptide;Acc:NP_776416]|18|ENSBTAG00000010123|ENSBTAT00000013354	244618	273989	217131	258810	121117	273549	193222	148841
ENSBTAP00000055528	1	1	31.45	0.134635	1.05295	1	1	unstim	PWM	|||16|ENSBTAG00000013700|ENSBTAT00000018200	880129	787948	909907	848972	774382	767923	882757	829555
ENSBTAP00000007743	14	14	629.6	0.134845	1.2183	2;3	2	PWM	unstim	ZAP70|HGNC Symbol|zeta-chain (TCR) associated protein kinase 70kDa [Source:HGNC Symbol;Acc:12858]|11|ENSBTAG00000005892|ENSBTAT00000007743	723174	447882	717897	724465	696719	638059	1.03727e+06	811872
ENSBTAP00000012904	3	3	113.02	0.13511	1.32619	3	1	PWM	unstim	GTF2I_BOVIN|UniProtKB/Swiss-Prot|General transcription factor II-I [Source:UniProtKB/Swiss-Prot;Acc:A7MB80]|25|ENSBTAG00000009780|ENSBTAT00000012904	27752.9	33080.2	42316.2	46731.8	28046	36539.3	71574.1	62611.4
ENSBTAP00000013787	8	7	456.26	0.135147	1.19606	2;3	2	unstim	PWM	Q0P5E0_BOVIN|UniProtKB/TrEMBL|lymphocyte-specific protein 1 [Source:RefSeq peptide;Acc:NP_001068842]|29|ENSBTAG00000010447|ENSBTAT00000013787	487269	528879	493720	592130	441482	382641	327663	605642
ENSBTAP00000027665	4	3	197.5	0.135379	1.14713	2;3	2	PWM	unstim	Q1LZC3_BOVIN|UniProtKB/TrEMBL|nicalin [Source:RefSeq peptide;Acc:NP_001069423]|7|ENSBTAG00000020759|ENSBTAT00000027665	70406.2	72256.2	62638.9	73516.1	79868.4	98329.1	66687	74954.4
ENSBTAP00000024887	1	1	60.46	0.136271	2.14851	3	1	unstim	PWM	Q08DP5_BOVIN|UniProtKB/TrEMBL|histone acetyltransferase MYST2 [Source:RefSeq peptide;Acc:NP_001070286]|19|ENSBTAG00000018699|ENSBTAT00000024887	16698.4	10943.8	6293.77	13123.8	4503.89	5166.33	8483.48	3749.68
ENSBTAP00000043063	17	12	1346.41	0.136692	1.59654	1;2;3	3	PWM	unstim	HBB_BOVIN|UniProtKB/Swiss-Prot|Hemoglobin subunit beta [Source:UniProtKB/Swiss-Prot;Acc:P02070]|15|ENSBTAG00000038748|ENSBTAT00000045694	5.10922e+08	3.20038e+07	2.76716e+07	7.98602e+07	6.60411e+08	7.85974e+07	2.01419e+08	9.80534e+07
ENSBTAP00000027095;ENSBTAP00000025485	4	4	121.72	0.136846	1.52435	2	1	unstim	PWM	OSBP|HGNC Symbol|oxysterol binding protein [Source:HGNC Symbol;Acc:8503]|15|ENSBTAG00000020332|ENSBTAT00000027095	203527	170323	244434	209514	87581.3	207417	147147	100903
ENSBTAP00000020880	1	1	32.29	0.137762	1.28177	2	1	PWM	unstim	TXNL1|EntrezGene|thioredoxin-like protein 1 [Source:RefSeq peptide;Acc:NP_001071354]|24|ENSBTAG00000015731|ENSBTAT00000020880	5228.53	10432.8	7844.33	12359.2	8914.54	13005.8	12736.4	11313.5
ENSBTAP00000012094	7	7	411.28	0.137802	1.08883	2;3	2	unstim	PWM	STXBP2|EntrezGene|syntaxin-binding protein 2 [Source:RefSeq peptide;Acc:NP_001039673]|7|ENSBTAG00000009178|ENSBTAT00000012094	215625	192966	170403	216562	215739	156902	162104	195905
ENSBTAP00000022470	5	1	171.96	0.137847	1.9207	2;3	2	unstim	PWM	CYFIP1|HGNC Symbol|cytoplasmic FMR1 interacting protein 1 [Source:HGNC Symbol;Acc:13759]|2|ENSBTAG00000016894|ENSBTAT00000022470	3272.81	1494.79	6787.53	4114.27	4534.01	200.992	1812.1	1611.09
ENSBTAP00000016796	1	1	32.49	0.138016	4.07015	3	1	PWM	unstim	C6H4orf43|EntrezGene|hypothetical protein LOC506277 [Source:RefSeq peptide;Acc:NP_001030206]|6|ENSBTAG00000012658|ENSBTAT00000016796	2916.16	3865.54	168.088	2663.76	4798.97	19226.9	10367.9	4734.76
ENSBTAP00000009990	1	1	43.88	0.138728	2.00377	2	1	unstim	PWM	BROX|HGNC Symbol|BRO1 domain and CAAX motif containing [Source:HGNC Symbol;Acc:26512]|16|ENSBTAG00000007595|ENSBTAT00000009990	10066.8	12226.2	8180.81	10167.3	3763.06	1446.63	4658.7	10413.9
ENSBTAP00000026580	8	8	296.78	0.140389	1.61252	1;2	2	unstim	PWM	CY24B_BOVIN|UniProtKB/Swiss-Prot|Cytochrome b-245 heavy chain [Source:UniProtKB/Swiss-Prot;Acc:O46522]|X|ENSBTAG00000019953|ENSBTAT00000026580	609283	946913	671638	795996	616382	787491	201980	269363
ENSBTAP00000017097	6	6	326.03	0.140514	1.33276	3	1	unstim	PWM	A5PJQ1_BOVIN|UniProtKB/TrEMBL|protein DEK [Source:RefSeq peptide;Acc:NP_001093187]|23|ENSBTAG00000012865|ENSBTAT00000017097	957099	1.37559e+06	1.27733e+06	1.10852e+06	1.02788e+06	1.04432e+06	665389	802836
ENSBTAP00000003340;ENSBTAP00000054113	9	9	583.25	0.140828	1.19084	3	1	unstim	PWM	A6QLX2_BOVIN|UniProtKB/TrEMBL|FBL protein [Source:UniProtKB/TrEMBL;Acc:A6QLX2]|18|ENSBTAG00000002579|ENSBTAT00000003340	1.7961e+06	2.28133e+06	1.56961e+06	1.59238e+06	1.39474e+06	1.6431e+06	1.66339e+06	1.37804e+06
ENSBTAP00000012405	1	1	63.4	0.140895	10.4247	3	1	PWM	unstim	EZH2|HGNC Symbol|enhancer of zeste homolog 2 (Drosophila) [Source:HGNC Symbol;Acc:3527]|4|ENSBTAG00000009426|ENSBTAT00000012405	972.646	0	561.06	2880.6	4709.09	13966.4	15666.9	11675.3
ENSBTAP00000006773	1	1	31.05	0.140923	1.49225	2	1	unstim	PWM	A4IFP8_BOVIN|UniProtKB/TrEMBL|acyl-CoA:lysophosphatidylglycerol acyltransferase 1 [Source:RefSeq peptide;Acc:NP_001077225]|16|ENSBTAG00000005137|ENSBTAT00000006773	16963.9	17047.6	8539.07	13353.6	12510.5	6282.91	7557.57	11112
ENSBTAP00000002420	1	1	27.57	0.141295	1.38769	3	1	unstim	PWM	RPB3_BOVIN|UniProtKB/Swiss-Prot|DNA-directed RNA polymerase II subunit RPB3 [Source:UniProtKB/Swiss-Prot;Acc:Q3T0Q3]|18|ENSBTAG00000001856|ENSBTAT00000002420	32974.8	28618	37686.2	23232.7	20340.7	29042.4	18524.2	20377
ENSBTAP00000053402	3	3	78.46	0.141716	1.79268	1	1	unstim	PWM	ENPP1|HGNC Symbol|ectonucleotide pyrophosphatase/phosphodiesterase 1 [Source:HGNC Symbol;Acc:3356]|9|ENSBTAG00000021830|ENSBTAT00000061365	131091	23734.6	95156.1	22787.6	49520.6	23093	60706.5	18837.6
ENSBTAP00000000677	3	1	96.31	0.141804	1.13505	1;2;3	3	PWM	unstim	ATP2B3|HGNC Symbol|ATPase, Ca++ transporting, plasma membrane 3 [Source:HGNC Symbol;Acc:816]|X|ENSBTAG00000000520|ENSBTAT00000000677	18372.1	14617.3	14874.6	11025.1	21913.3	13946.3	18614.1	12368.5
ENSBTAP00000016954	15	13	1126.84	0.141998	1.26433	2;3	2	PWM	unstim	TCPH_BOVIN|UniProtKB/Swiss-Prot|T-complex protein 1 subunit eta [Source:UniProtKB/Swiss-Prot;Acc:Q2NKZ1]|11|ENSBTAG00000012756|ENSBTAT00000016954	3.64462e+06	2.18918e+06	2.44285e+06	1.98763e+06	3.47993e+06	3.8638e+06	2.9479e+06	2.68577e+06
ENSBTAP00000016250	1	1	60.27	0.142098	153.936	3	1	PWM	unstim	Q3SZ29_BOVIN|UniProtKB/TrEMBL|DNA-directed RNA polymerase I subunit RPA49 [Source:RefSeq peptide;Acc:NP_001029580]|8|ENSBTAG00000012243|ENSBTAT00000016250	105.973	0	0	0	420.501	0	12795	3097.5
ENSBTAP00000009109	1	1	41.75	0.142973	2.69786	2	1	unstim	PWM	E1BF95_BOVIN|UniProtKB/TrEMBL|Uncharacterized protein [Source:UniProtKB/TrEMBL;Acc:E1BF95]|17|ENSBTAG00000006938|ENSBTAT00000009109	2935.35	8932.11	2714	3475.45	933.063	588.762	963.825	4207.41
ENSBTAP00000019834;ENSBTAP00000052696	12	12	591.78	0.143199	1.88037	2;3	2	unstim	PWM	E1BCS3_BOVIN|UniProtKB/TrEMBL|hexokinase 3 [Source:RefSeq peptide;Acc:NP_001095399]|7|ENSBTAG00000014898|ENSBTAT00000019834	276319	419028	300355	356162	441266	106996	78281.8	92392.5
ENSBTAP00000047888	4	4	165.33	0.143521	1.28653	1;3	2	unstim	PWM	||Uncharacterized protein [Source:UniProtKB/TrEMBL;Acc:F1MGN3]|4|ENSBTAG00000000144|ENSBTAT00000052995	175060	66277.7	101581	107324	113941	71707.5	80437.2	83879.6
ENSBTAP00000023029	1	1	47.35	0.143662	1.38891	3	1	unstim	PWM	SUMO3_BOVIN|UniProtKB/Swiss-Prot|Small ubiquitin-related modifier 3 [Source:UniProtKB/Swiss-Prot;Acc:Q17QV3]|1|ENSBTAG00000017321|ENSBTAT00000023029	35363.9	78086.6	45850.9	48548.7	38520.8	58165.4	20976.6	31986.5
ENSBTAP00000004870	1	1	58.32	0.143923	1.98181	2;3	2	PWM	unstim	||Uncharacterized protein [Source:UniProtKB/TrEMBL;Acc:F1N434]|9|ENSBTAG00000003743|ENSBTAT00000004870	33824	10046.7	24524.5	29906.3	40462.7	41766.4	82550.4	30034.9
ENSBTAP00000021471	1	1	37.87	0.144186	1.32117	2;3	2	PWM	unstim	RT07_BOVIN|UniProtKB/Swiss-Prot|28S ribosomal protein S7, mitochondrial [Source:UniProtKB/Swiss-Prot;Acc:Q3T040]|19|ENSBTAG00000016133|ENSBTAT00000021471	5543.73	10736.1	8715.77	6522.92	10592.7	12958.5	8212.74	9877.39
ENSBTAP00000002327	2	2	78.6	0.144203	1.19247	2	1	unstim	PWM	C6K7D3_BOVIN|UniProtKB/TrEMBL|NAD-dependent deacetylase sirtuin-2 [Source:RefSeq peptide;Acc:NP_001107003]|18|ENSBTAG00000001776|ENSBTAT00000002327	19779.4	28449.2	23169.4	24320	21398.7	20983	19215.6	18671.2
ENSBTAP00000015781	6	6	174.6	0.144639	1.06957	1	1	unstim	PWM	CD22|HGNC Symbol|CD22 molecule [Source:HGNC Symbol;Acc:1643]|18|ENSBTAG00000011887|ENSBTAT00000015781	111904	145666	58690.6	44799.4	99959.7	144025	49391.5	44200.1
ENSBTAP00000015548	2	2	84.95	0.144771	1.64061	2	1	unstim	PWM	IMPA1_BOVIN|UniProtKB/Swiss-Prot|Inositol monophosphatase 1 [Source:UniProtKB/Swiss-Prot;Acc:P20456]|14|ENSBTAG00000011709|ENSBTAT00000015548	25139.6	53614	43422.2	55726.3	30583.7	31764.4	23859.9	22228.6
ENSBTAP00000002451;ENSBTAP00000031933	2	2	97.33	0.145223	1.16168	1	1	unstim	PWM	CD79A_BOVIN|UniProtKB/Swiss-Prot|B-cell antigen receptor complex-associated protein alpha chain [Source:UniProtKB/Swiss-Prot;Acc:P40293]|18|ENSBTAG00000001882|ENSBTAT00000002451	273473	714560	181721	158099	219316	699043	92598.3	132086
ENSBTAP00000023753	1	1	43.59	0.145601	1.65277	3	1	unstim	PWM	Q08DS9_BOVIN|UniProtKB/TrEMBL|probable ATP-dependent RNA helicase DHX40 [Source:RefSeq peptide;Acc:NP_001070365]|19|ENSBTAG00000017868|ENSBTAT00000023753	4435.29	4735.19	3744.61	3388.2	2190.1	1275.49	4689.93	1708.72
ENSBTAP00000013719	5	5	190.93	0.146126	1.50429	2	1	unstim	PWM	SCLY_BOVIN|UniProtKB/Swiss-Prot|Selenocysteine lyase [Source:UniProtKB/Swiss-Prot;Acc:A2VDS1]|3|ENSBTAG00000017826|ENSBTAT00000013719	104001	79110.6	150825	166202	115227	59307.8	87642.8	70297.4
ENSBTAP00000001613	12	6	502.45	0.146201	1.11508	1;2;3	3	unstim	PWM	|||8|ENSBTAG00000001219|ENSBTAT00000001613	1.82572e+06	2.65384e+06	840575	1.01062e+06	1.4243e+06	2.79329e+06	576429	883385
ENSBTAP00000048341	1	1	32.93	0.146259	1.47119	3	1	unstim	PWM	Q58DG7_BOVIN|UniProtKB/TrEMBL|transcription initiation factor TFIID subunit 6 [Source:RefSeq peptide;Acc:NP_001015525]|25|ENSBTAG00000030966|ENSBTAT00000054282	13207	11862.4	9769.25	9418.01	7295.98	7732.98	11463	3590.32
ENSBTAP00000013622	2	2	97.49	0.147651	2.75441	3	1	PWM	unstim	DDX52_BOVIN|UniProtKB/Swiss-Prot|Probable ATP-dependent RNA helicase DDX52 [Source:UniProtKB/Swiss-Prot;Acc:A5D7C1]|19|ENSBTAG00000010313|ENSBTAT00000013622	14385.3	5365.3	5591.88	10977.6	12446.3	13032.4	50244	24318
ENSBTAP00000054571	33	33	1269.48	0.147692	1.33177	1;2	2	unstim	PWM	ITGAM|EntrezGene|integrin alpha M [Source:RefSeq peptide;Acc:NP_001035046]|25|ENSBTAG00000047238|ENSBTAT00000063617	3.14202e+06	4.37698e+06	3.33636e+06	2.50509e+06	3.05971e+06	4.10197e+06	1.52005e+06	1.35034e+06
ENSBTAP00000042855	1	1	31.53	0.147973	1.58278	2	1	unstim	PWM	SCYL1|EntrezGene|N-terminal kinase-like protein [Source:RefSeq peptide;Acc:NP_001095491]|29|ENSBTAG00000006740|ENSBTAT00000045467	4636.09	5971.73	4594.94	5372.14	1912.12	1813.65	4344.18	4929.23
ENSBTAP00000012349	1	1	30.17	0.148432	6.1014	2	1	unstim	PWM	INF2|HGNC Symbol|inverted formin, FH2 and WH2 domain containing [Source:HGNC Symbol;Acc:23791]|21|ENSBTAG00000007187|ENSBTAT00000012349	7053	0	1996.31	3896.81	114.348	0	266.846	1740.63
ENSBTAP00000016712	1	1	52.93	0.148501	5.12441	2	1	PWM	unstim	CH10_BOVIN|UniProtKB/Swiss-Prot|10 kDa heat shock protein, mitochondrial [Source:UniProtKB/Swiss-Prot;Acc:P61603]|2|ENSBTAG00000012589|ENSBTAT00000016712	4598.68	7962.62	3070.65	1058.8	29573.8	47862	7397.73	696.792
ENSBTAP00000039319	3	1	66.23	0.148699	1.79071	3	1	PWM	unstim	SNRPB2|HGNC Symbol|small nuclear ribonucleoprotein polypeptide B [Source:HGNC Symbol;Acc:11155]|13|ENSBTAG00000027506|ENSBTAT00000039526	12153.8	28402.5	23674.9	29803.5	39780.7	68661.2	21902.9	38044.3
ENSBTAP00000022205	3	3	142.84	0.148822	1.31419	3	1	PWM	unstim	CDC73|HGNC Symbol|cell division cycle 73, Paf1/RNA polymerase II complex component, homolog (S. cerevisiae) [Source:HGNC Symbol;Acc:16783]|16|ENSBTAG00000016703|ENSBTAT00000022205	26284.6	14687.7	28426	33538.1	32642.3	31752.9	29466	41416.7
ENSBTAP00000013326	3	3	107.76	0.149716	1.75663	3	1	PWM	unstim	BYST_BOVIN|UniProtKB/Swiss-Prot|Bystin [Source:UniProtKB/Swiss-Prot;Acc:Q5E9N0]|23|ENSBTAG00000010101|ENSBTAT00000013326	22385.5	21925.3	11780.4	26707.6	19997.7	37889.1	43552	44008.2
ENSBTAP00000024880	3	3	73.44	0.150228	1.54006	2	1	unstim	PWM	ACSS3|EntrezGene|acyl-CoA synthetase short-chain family member 3, mitochondrial precursor [Source:RefSeq peptide;Acc:NP_001095607]|5|ENSBTAG00000018694|ENSBTAT00000024880	25069.1	48002.2	55634.3	65582.4	28853.6	33555.5	34217.2	29530.1
ENSBTAP00000009643	1	1	106.7	0.150463	1.24262	2;3	2	PWM	unstim	ATP5L|EntrezGene|ATP synthase subunit g, mitochondrial [Source:RefSeq peptide;Acc:NP_001019721]|15|ENSBTAG00000007332|ENSBTAT00000009643	398642	587885	562961	418097	688291	592010	617746	546910
ENSBTAP00000022774	3	3	164.02	0.150577	2.22323	2	1	unstim	PWM	CATS_BOVIN|UniProtKB/Swiss-Prot|Cathepsin S [Source:UniProtKB/Swiss-Prot;Acc:P25326]|3|ENSBTAG00000017135|ENSBTAT00000022774	264308	283973	334201	566363	321105	173017	79227.8	78334.8
ENSBTAP00000002852	3	3	118.59	0.150663	1.16554	2;3	2	PWM	unstim	NDUS2_BOVIN|UniProtKB/Swiss-Prot|NADH dehydrogenase [ubiquinone] iron-sulfur protein 2, mitochondrial [Source:UniProtKB/Swiss-Prot;Acc:P17694]|3|ENSBTAG00000002203|ENSBTAT00000002852	106321	92872.1	120344	85582.4	145532	111029	112534	103089
ENSBTAP00000002170;ENSBTAP00000012314	4	4	300.65	0.150753	2.01584	2;3	2	unstim	PWM	PICALM|EntrezGene|phosphatidylinositol-binding clathrin assembly protein [Source:RefSeq peptide;Acc:NP_001095447]|29|ENSBTAG00000001657|ENSBTAT00000002170	93386.3	180115	123322	137174	87606.4	26498.3	75542.6	75253.4
ENSBTAP00000025246	1	1	75.7	0.151958	1.78066	2;3	2	PWM	unstim	RPAC1_BOVIN|UniProtKB/Swiss-Prot|DNA-directed RNA polymerases I and III subunit RPAC1 [Source:UniProtKB/Swiss-Prot;Acc:Q32L22]|23|ENSBTAG00000018969|ENSBTAT00000025246	18976.9	1710.61	7514.87	13613.1	13289.4	4848.57	25769.1	30552
ENSBTAP00000012138	1	1	30.21	0.152502	1.22088	1	1	unstim	PWM	APOA2_BOVIN|UniProtKB/Swiss-Prot|Apolipoprotein A-IIApolipoprotein A-II(1-76) [Source:UniProtKB/Swiss-Prot;Acc:P81644]|3|ENSBTAG00000009212|ENSBTAT00000012138	6253.45	10688.7	10432.2	10243.9	5586.19	11088.9	7762.61	6374.59
ENSBTAP00000006430	8	8	353.79	0.152789	1.13723	2;3	2	PWM	unstim	DCTN1|EntrezGene|dynactin subunit 1 [Source:RefSeq peptide;Acc:NP_001092404]|11|ENSBTAG00000004887|ENSBTAT00000006430	93703.8	53051.8	99740.3	106654	95614.3	77692.9	110659	117645
ENSBTAP00000011613	2	1	46.93	0.15373	1.29706	2	1	unstim	PWM	SPS1_BOVIN|UniProtKB/Swiss-Prot|Selenide, water dikinase 1 [Source:UniProtKB/Swiss-Prot;Acc:Q0VC82]|13|ENSBTAG00000008821|ENSBTAT00000011613	6447.89	10863.5	9381.7	11785.4	7241.62	7416.12	7363.29	7645.01
ENSBTAP00000011521	16	16	835.96	0.153925	1.36663	1;2;3	3	unstim	PWM	ALDH2_BOVIN|UniProtKB/Swiss-Prot|Aldehyde dehydrogenase, mitochondrial [Source:UniProtKB/Swiss-Prot;Acc:P20000]|17|ENSBTAG00000008743|ENSBTAT00000011521	3.46016e+06	3.79296e+06	4.82739e+06	3.66595e+06	3.98891e+06	2.85028e+06	2.78023e+06	1.90265e+06
ENSBTAP00000024915;ENSBTAP00000003750	4	4	130.81	0.15394	1.29104	2	1	unstim	PWM	DDI2|HGNC Symbol|DNA-damage inducible 1 homolog 2 (S. cerevisiae) [Source:HGNC Symbol;Acc:24578]|16|ENSBTAG00000018718|ENSBTAT00000024915	83627.8	86625.1	77045.8	89810	77506.7	42054.7	65669.5	75882.7
ENSBTAP00000001802	3	3	106.91	0.155044	1.23047	1;2	2	unstim	PWM	LG3BP_BOVIN|UniProtKB/Swiss-Prot|Galectin-3-binding protein [Source:UniProtKB/Swiss-Prot;Acc:A7E3W2]|19|ENSBTAG00000001368|ENSBTAT00000001802	102689	130293	96026.2	95631.8	83883.9	82463.7	75906.8	102849
ENSBTAP00000018130	2	2	63.48	0.15513	1.57318	1	1	unstim	PWM	KLRG1|HGNC Symbol|killer cell lectin-like receptor subfamily G, member 1 [Source:HGNC Symbol;Acc:6380]|5|ENSBTAG00000013640|ENSBTAT00000018130	159700	112954	155061	11838.6	99226.6	102717	65908	11553.8
ENSBTAP00000003261	20	19	1160.01	0.155665	1.30553	2;3	2	unstim	PWM	|||29|ENSBTAG00000002510|ENSBTAT00000003261	2.92781e+06	2.73532e+06	2.41527e+06	2.81579e+06	1.76324e+06	2.16385e+06	2.73013e+06	1.68742e+06
ENSBTAP00000017995;ENSBTAP00000002299	8	8	580.23	0.15657	1.18826	1;2;3	3	PWM	unstim	CLIC1_BOVIN|UniProtKB/Swiss-Prot|Chloride intracellular channel protein 1 [Source:UniProtKB/Swiss-Prot;Acc:Q5E9B7]|23|ENSBTAG00000013533|ENSBTAT00000017995	2.56466e+06	2.33883e+06	2.89795e+06	2.98614e+06	3.29127e+06	3.41917e+06	3.28534e+06	2.82272e+06
ENSBTAP00000018822	3	3	183.65	0.156612	1.27207	2;3	2	unstim	PWM	ARMC10|HGNC Symbol|armadillo repeat containing 10 [Source:HGNC Symbol;Acc:21706]|4|ENSBTAG00000014161|ENSBTAT00000018822	68372.6	64922.6	107089	82857	48949.7	73259.9	68456.1	63441.4
ENSBTAP00000016495	6	6	385.18	0.157081	1.17911	2;3	2	unstim	PWM	SH3BP1|HGNC Symbol|SH3-domain binding protein 1 [Source:HGNC Symbol;Acc:10824]|5|ENSBTAG00000030257|ENSBTAT00000016495	273239	262319	292732	302907	222906	220825	311957	203679
ENSBTAP00000045796	2	2	43.07	0.157182	2.15194	3	1	PWM	unstim	BMS1|HGNC Symbol|BMS1 homolog, ribosome assembly protein (yeast) [Source:HGNC Symbol;Acc:23505]|28|ENSBTAG00000012878|ENSBTAT00000048816	14853.4	9433.67	5219.59	13919.8	14121.7	19051.4	36277	24000.9
ENSBTAP00000018492	2	1	46.81	0.157515	5.77583	2	1	unstim	PWM	KCRM_BOVIN|UniProtKB/Swiss-Prot|Creatine kinase M-type [Source:UniProtKB/Swiss-Prot;Acc:Q9XSC6]|18|ENSBTAG00000013921|ENSBTAT00000018492	8392.07	8342.47	106741	8900.48	8337.91	4837.16	6900.87	2842.95
ENSBTAP00000046374	5	5	148.07	0.157607	1.19716	3	1	PWM	unstim	SRSF1_BOVIN|UniProtKB/Swiss-Prot|Serine/arginine-rich splicing factor 1 [Source:UniProtKB/Swiss-Prot;Acc:Q0VCY7]|19|ENSBTAG00000014766|ENSBTAT00000049486	301696	420077	462957	350098	461468	404851	508929	462192
ENSBTAP00000026703	3	3	167.01	0.157877	1.34906	2;3	2	PWM	unstim	ARHGAP17|HGNC Symbol|Rho GTPase activating protein 17 [Source:HGNC Symbol;Acc:18239]|25|ENSBTAG00000020043|ENSBTAT00000026703	42718.2	27597.1	73090.6	59783.5	81733.5	29231.8	74359.3	88790.9
ENSBTAP00000029018	3	3	141.69	0.158105	1.52851	3	1	PWM	unstim	E1BIN5_BOVIN|UniProtKB/TrEMBL|Uncharacterized protein [Source:UniProtKB/TrEMBL;Acc:E1BIN5]|2|ENSBTAG00000021769|ENSBTAT00000029018	11445.2	11172.9	12922.6	11054.4	12051.2	11779.3	29693.4	17697.3
ENSBTAP00000005560	3	1	60.68	0.158455	1.3668	2	1	unstim	PWM	VAV1|HGNC Symbol|vav 1 guanine nucleotide exchange factor [Source:HGNC Symbol;Acc:12657]|7|ENSBTAG00000039160|ENSBTAT00000005560	7798.77	11153.8	10073.9	6319.01	7531.45	4961.33	8445.23	4922.04
ENSBTAP00000044619;ENSBTAP00000044193	27	27	2173	0.158566	1.19664	1;2;3	3	unstim	PWM	A5D984_BOVIN|UniProtKB/TrEMBL|Pyruvate kinase [Source:UniProtKB/TrEMBL;Acc:A5D984]|10|ENSBTAG00000001601|ENSBTAT00000047412	2.10719e+07	2.39446e+07	2.40059e+07	2.69283e+07	2.15514e+07	2.26263e+07	1.75398e+07	1.84657e+07
ENSBTAP00000055064	4	1	156.42	0.158995	1.96521	1	1	unstim	PWM	||Uncharacterized protein [Source:UniProtKB/TrEMBL;Acc:F1N5I7]|5|ENSBTAG00000039380|ENSBTAT00000065821	15055.6	2519.48	12846.3	5019.43	9001.05	2877.16	3252.76	2903.17
ENSBTAP00000053458	1	1	27.96	0.160065	2.33963	2	1	PWM	unstim	MMS19|EntrezGene|MMS19 nucleotide excision repair homolog [Source:RefSeq peptide;Acc:NP_001095627]|26|ENSBTAG00000012704|ENSBTAT00000061179	1954.17	1100.58	207.963	2574.99	2316.03	1527.77	2735.24	7079.05
ENSBTAP00000034967	1	1	101.43	0.160578	1.47155	3	1	unstim	PWM	A6QQE2_BOVIN|UniProtKB/TrEMBL|arf-GAP with coiled-coil, ANK repeat and PH domain-containing protein 1 [Source:RefSeq peptide;Acc:NP_001096704]|19|ENSBTAG00000010527|ENSBTAT00000035087	38436.2	25862.6	24664	30028.4	17937.2	17190.8	30504.6	15228.6
ENSBTAP00000015019	6	6	306.46	0.160692	1.51631	3	1	PWM	unstim	XRN2|HGNC Symbol|5'-3' exoribonuclease 2 [Source:HGNC Symbol;Acc:12836]|13|ENSBTAG00000011304|ENSBTAT00000015019	105337	132422	101986	135266	149407	137040	271771	162045
ENSBTAP00000003022	1	1	60.12	0.160743	1.33346	3	1	unstim	PWM	A5PJG9_BOVIN|UniProtKB/TrEMBL|protein C-ets-1 [Source:RefSeq peptide;Acc:NP_001092576]|29|ENSBTAG00000002341|ENSBTAT00000003022	28833.8	35764.4	29129.6	26498.4	18636.6	21391.5	35554.9	14578
ENSBTAP00000000088	3	2	89.59	0.161301	3.58464	2;3	2	PWM	unstim	GRWD1_BOVIN|UniProtKB/Swiss-Prot|Glutamate-rich WD repeat-containing protein 1 [Source:UniProtKB/Swiss-Prot;Acc:Q1JQD2]|18|ENSBTAG00000000080|ENSBTAT00000000088	2111.2	1818.39	8308.38	1207.36	5925.1	1843.4	16562.6	23865.6
ENSBTAP00000022210	36	36	1939.32	0.161447	1.05981	2;3	2	unstim	PWM	CLTC|EntrezGene|clathrin heavy chain 1 [Source:RefSeq peptide;Acc:NP_776448]|19|ENSBTAG00000016708|ENSBTAT00000022210	3.81247e+06	3.46937e+06	5.02052e+06	3.10375e+06	3.7959e+06	3.19991e+06	4.45623e+06	3.08466e+06
ENSBTAP00000016718	2	2	121.34	0.161527	2.92698	2	1	unstim	PWM	UK114_BOVIN|UniProtKB/Swiss-Prot|Ribonuclease UK114 [Source:UniProtKB/Swiss-Prot;Acc:Q3T114]|14|ENSBTAG00000012595|ENSBTAT00000016718	28590	121451	47247	100404	53992.2	27422.4	10484	9807.52
ENSBTAP00000013953	3	3	60.23	0.161813	1.30156	2	1	PWM	unstim	PSMG2_BOVIN|UniProtKB/Swiss-Prot|Proteasome assembly chaperone 2 [Source:UniProtKB/Swiss-Prot;Acc:Q2NL24]|24|ENSBTAG00000010552|ENSBTAT00000013953	57133.7	46374.4	47697.9	46792.2	51339.8	80807.1	65959.6	59600.9
ENSBTAP00000044113	4	4	180.81	0.162007	1.37766	1	1	unstim	PWM	F1N4U9_BOVIN|UniProtKB/TrEMBL|L-selectin [Source:RefSeq peptide;Acc:NP_776607]|16|ENSBTAG00000011515|ENSBTAT00000046865	315376	327027	400356	263717	173646	388668	194376	191638
ENSBTAP00000009308	38	30	2337.35	0.162128	1.25225	1;2;3	3	unstim	PWM	LCP1|EntrezGene|plastin-2 [Source:RefSeq peptide;Acc:NP_001029892]|12|ENSBTAG00000007079|ENSBTAT00000009308	1.55313e+07	2.84657e+07	1.92102e+07	2.13166e+07	1.46821e+07	1.68499e+07	1.81605e+07	1.7805e+07
ENSBTAP00000003544	1	1	36.42	0.162211	1.23136	2;3	2	PWM	unstim	CP013_BOVIN|UniProtKB/Swiss-Prot|UPF0585 protein C16orf13 homolog [Source:UniProtKB/Swiss-Prot;Acc:Q32KX8]|25|ENSBTAG00000002735|ENSBTAT00000003544	24176.4	18823.1	17441.6	18871.4	22394.5	28691.1	24995.8	21580.8
ENSBTAP00000034179	4	4	174.56	0.162575	1.08051	1;2	2	PWM	unstim	BOLA-DQA2|EntrezGene|major histocompatibility complex, class II, DQ alpha 2 [Source:RefSeq peptide;Acc:NP_001012699]|23|ENSBTAG00000009656|ENSBTAT00000034282	411850	403679	296922	19844.9	490799	413749	294304	24607.5
ENSBTAP00000028959	1	1	47.31	0.162644	1.44681	3	1	unstim	PWM	PCID2|EntrezGene|PCI domain-containing protein 2 [Source:RefSeq peptide;Acc:NP_001033674]|12|ENSBTAG00000021725|ENSBTAT00000028959	14339.8	21533.4	16630.1	13334.9	8561.4	8310.26	18269	10365.2
ENSBTAP00000045026	2	2	42.7	0.162802	1.16644	1	1	PWM	unstim	F1MB25_BOVIN|UniProtKB/TrEMBL|ectonucleoside triphosphate diphosphohydrolase 1 [Source:RefSeq peptide;Acc:NP_776961]|26|ENSBTAG00000020589|ENSBTAT00000047862	24768.9	30690.4	19318.8	17710.4	32525.3	35936.8	22894.4	16525.4
ENSBTAP00000007177	8	7	322.03	0.163337	1.19786	2;3	2	unstim	PWM	F1N556_BOVIN|UniProtKB/TrEMBL|Ubiquitin carboxyl-terminal hydrolase [Source:UniProtKB/TrEMBL;Acc:F1N556]|25|ENSBTAG00000005455|ENSBTAT00000007177	272972	232309	241633	251477	176973	192971	259045	204490
ENSBTAP00000041167	2	1	56.71	0.163344	1.51195	2;3	2	unstim	PWM	A6QP60_BOVIN|UniProtKB/TrEMBL|Uncharacterized protein [Source:UniProtKB/TrEMBL;Acc:F1MN29]|4|ENSBTAG00000005483|ENSBTAT00000043608	18455.2	9929.1	19549.8	18303.6	12532.7	10972.9	13532.3	6771.45
ENSBTAP00000054889;ENSBTAP00000011602;ENSBTAP00000054832	11	11	564.11	0.163528	1.53514	2;3	2	PWM	unstim	PTBP1_BOVIN|UniProtKB/Swiss-Prot|Polypyrimidine tract-binding protein 1 [Source:UniProtKB/Swiss-Prot;Acc:Q8WN55]|7|ENSBTAG00000045828|ENSBTAT00000066209	1.03922e+06	1.38204e+06	3.49384e+06	1.34811e+06	2.39489e+06	1.74993e+06	3.07487e+06	3.93032e+06
ENSBTAP00000008802	3	3	77.09	0.164751	1.33245	2;3	2	unstim	PWM	VCPIP1|HGNC Symbol|valosin containing protein (p97)/p47 complex interacting protein 1 [Source:HGNC Symbol;Acc:30897]|14|ENSBTAG00000006695|ENSBTAT00000008802	20353.3	11733.3	12107.4	18170.5	13193.2	9390.74	13706.3	10514
ENSBTAP00000040280;ENSBTAP00000034616	4	3	195.28	0.165307	1.24311	2;3	2	unstim	PWM	GDIR1_BOVIN|UniProtKB/Swiss-Prot|Rho GDP-dissociation inhibitor 1 [Source:UniProtKB/Swiss-Prot;Acc:P19803]|19|ENSBTAG00000030209|ENSBTAT00000042645	1.13463e+06	1.47936e+06	1.27742e+06	1.68133e+06	1.07424e+06	1.44694e+06	987859	973865
ENSBTAP00000029304	3	2	234.01	0.165408	1.62448	2;3	2	PWM	unstim	EF1B_BOVIN|UniProtKB/Swiss-Prot|Elongation factor 1-beta [Source:UniProtKB/Swiss-Prot;Acc:Q5E983]|2|ENSBTAG00000021979|ENSBTAT00000029304	194272	228958	263005	152356	263363	575035	221941	301937
ENSBTAP00000056437;ENSBTAP00000054055	11	11	530.54	0.165498	1.28217	2;3	2	unstim	PWM	KCTD12|HGNC Symbol|potassium channel tetramerisation domain containing 12 [Source:HGNC Symbol;Acc:14678]|12|ENSBTAG00000001414|ENSBTAT00000001854	2.25072e+06	1.47608e+06	1.91148e+06	2.06058e+06	2.32729e+06	1.01373e+06	1.66929e+06	994252
ENSBTAP00000035031	1	1	21.12	0.165569	2.13467	3	1	PWM	unstim	||Uncharacterized protein [Source:UniProtKB/TrEMBL;Acc:E1BCU7]|19|ENSBTAG00000017440|ENSBTAT00000035153	2262.95	1219.29	2337.13	3321.78	2515.68	1538.71	10215.1	5243.85
ENSBTAP00000009178	2	2	48.15	0.165583	1.11107	1	1	unstim	PWM	Q45VK8_BOVIN|UniProtKB/TrEMBL|complement decay-accelerating factor [Source:RefSeq peptide;Acc:NP_001025474]|16|ENSBTAG00000006984|ENSBTAT00000009178	35445.6	74966.7	22112	16063.9	33758.8	73937.4	13508.6	12529
ENSBTAP00000038002	10	10	341.57	0.165688	1.14115	2;3	2	unstim	PWM	DGKA_BOVIN|UniProtKB/Swiss-Prot|Diacylglycerol kinase alpha [Source:UniProtKB/Swiss-Prot;Acc:A0JN54]|5|ENSBTAG00000004018|ENSBTAT00000038186	191345	219684	248077	196005	137846	178111	230509	202879
ENSBTAP00000015748;ENSBTAP00000033014	13	12	542.53	0.166203	1.23891	3	1	unstim	PWM	Q1RMW3_BOVIN|UniProtKB/TrEMBL|metastasis-associated protein MTA2 [Source:RefSeq peptide;Acc:NP_001069180]|29|ENSBTAG00000011865|ENSBTAT00000015748	636725	666141	532716	474044	398784	502490	600096	362875
ENSBTAP00000010393	4	1	151.56	0.166301	17.1878	2;3	2	PWM	unstim	K2C73_BOVIN|UniProtKB/Swiss-Prot|Keratin, type II cytoskeletal 73 [Source:UniProtKB/Swiss-Prot;Acc:A7YWK3]|5|ENSBTAG00000037638|ENSBTAT00000010393	3267.84	316.97	218.369	1024.9	22093.1	2431.58	57814.6	644.998
ENSBTAP00000004279	3	3	117.05	0.166614	1.71607	3	1	unstim	PWM	NCF1_BOVIN|UniProtKB/Swiss-Prot|Neutrophil cytosol factor 1 [Source:UniProtKB/Swiss-Prot;Acc:O77774]|25|ENSBTAG00000003305|ENSBTAT00000004279	97833.9	140950	77632.9	145800	129858	55683.6	45636.9	38167.9
ENSBTAP00000018878	2	2	65.9	0.16838	1.06777	2;3	2	unstim	PWM	CDK5RAP3|EntrezGene|CDK5 regulatory subunit-associated protein 3 [Source:RefSeq peptide;Acc:NP_001068867]|19|ENSBTAG00000014202|ENSBTAT00000018878	24549.5	22871.4	25221.3	22747.9	22127.1	22569.8	25248.3	19390.9
ENSBTAP00000017775	17	17	1017.96	0.168669	1.22258	1;2;3	3	unstim	PWM	CAP1_BOVIN|UniProtKB/Swiss-Prot|Adenylyl cyclase-associated protein 1 [Source:UniProtKB/Swiss-Prot;Acc:Q3SYV4]|3|ENSBTAG00000013363|ENSBTAT00000017775	4.69014e+06	5.13442e+06	5.81283e+06	5.96504e+06	4.6432e+06	5.03959e+06	4.21302e+06	3.77379e+06
ENSBTAP00000048477	21	21	665.2	0.169244	1.41918	1;2;3	3	unstim	PWM	AHNAK|HGNC Symbol|AHNAK nucleoprotein [Source:HGNC Symbol;Acc:347]|29|ENSBTAG00000013468|ENSBTAT00000052103	1.19779e+06	1.34492e+06	1.23806e+06	1.39547e+06	1.48238e+06	911841	661266	591850
ENSBTAP00000022548	9	9	370.14	0.169397	1.36254	1;2;3	3	PWM	unstim	PSMD5_BOVIN|UniProtKB/Swiss-Prot|26S proteasome non-ATPase regulatory subunit 5 [Source:UniProtKB/Swiss-Prot;Acc:Q0P5A6]|8|ENSBTAG00000016952|ENSBTAT00000022548	361364	249058	195873	242071	324284	297347	392117	414689
ENSBTAP00000028671	8	7	317.82	0.169513	1.23169	2;3	2	PWM	unstim	DNPEP_BOVIN|UniProtKB/Swiss-Prot|Aspartyl aminopeptidase [Source:UniProtKB/Swiss-Prot;Acc:Q2HJH1]|2|ENSBTAG00000021514|ENSBTAT00000028671	206959	223336	149908	254909	297958	323206	177108	230328
ENSBTAP00000028602;ENSBTAP00000020036	7	7	496.79	0.17056	1.23733	1;2;3	3	unstim	PWM	COF1_BOVIN|UniProtKB/Swiss-Prot|Cofilin-1 [Source:UniProtKB/Swiss-Prot;Acc:Q5E9F7]|29|ENSBTAG00000021455|ENSBTAT00000028602	5.49594e+06	5.32667e+06	6.4742e+06	6.32043e+06	5.85582e+06	4.83308e+06	4.10464e+06	4.2937e+06
ENSBTAP00000018741	12	12	697.96	0.171149	1.24996	1;2;3	3	unstim	PWM	IDHP_BOVIN|UniProtKB/Swiss-Prot|Isocitrate dehydrogenase [NADP], mitochondrial [Source:UniProtKB/Swiss-Prot;Acc:Q04467]|21|ENSBTAG00000014093|ENSBTAT00000018741	1.34706e+06	1.70772e+06	1.55636e+06	1.46366e+06	1.47474e+06	1.3865e+06	1.17071e+06	828032
ENSBTAP00000020356	4	4	173.2	0.17163	1.33261	3	1	unstim	PWM	A5PKF6_BOVIN|UniProtKB/TrEMBL|SWI/SNF-related matrix-associated actin-dependent regulator of chromatin e1 [Source:RefSeq peptide;Acc:NP_001092586]|19|ENSBTAG00000015308|ENSBTAT00000020356	113472	129770	126279	86532.2	64561.5	171357	64244.1	42062.7
ENSBTAP00000018092	17	17	969.55	0.172319	1.20331	1;2;3	3	unstim	PWM	WDR1|EntrezGene|WD repeat-containing protein 1 [Source:RefSeq peptide;Acc:NP_001039811]|6|ENSBTAG00000013607|ENSBTAT00000018092	3.69096e+06	5.14998e+06	5.24358e+06	4.84907e+06	4.07889e+06	4.25093e+06	3.62918e+06	3.77563e+06
ENSBTAP00000024515	5	5	296.59	0.172339	1.23785	2;3	2	PWM	unstim	PSD7_BOVIN|UniProtKB/Swiss-Prot|26S proteasome non-ATPase regulatory subunit 7 [Source:UniProtKB/Swiss-Prot;Acc:Q3ZBD0]|18|ENSBTAG00000018425|ENSBTAT00000024515	572507	365085	336395	435393	512000	581827	502730	519394
ENSBTAP00000026785	9	9	392.84	0.172466	1.15261	2;3	2	PWM	unstim	LETM1|EntrezGene|LETM1 and EF-hand domain-containing protein 1, mitochondrial precursor [Source:RefSeq peptide;Acc:NP_001069082]|6|ENSBTAG00000020108|ENSBTAT00000026785	221430	244859	141047	219038	243626	229663	189254	289948
ENSBTAP00000027862	1	1	23.72	0.172632	3.72544	1	1	unstim	PWM	SIRPB1|EntrezGene|signal-regulatory protein beta 1 [Source:RefSeq peptide;Acc:NP_001074380]|13|ENSBTAG00000039520|ENSBTAT00000027862	2409.84	470.58	2459.81	6549.23	1398.82	687.361	300.231	805.015
ENSBTAP00000041364	2	2	81.87	0.17319	1.25779	3	1	unstim	PWM	A3KN48_BOVIN|UniProtKB/TrEMBL|selenocysteine-specific elongation factor [Source:RefSeq peptide;Acc:NP_001076933]|22|ENSBTAG00000030962|ENSBTAT00000043822	49870.9	59869.1	39403.4	51428.1	43468.3	36625.7	42781.3	36587.6
ENSBTAP00000053740	4	3	115.26	0.17321	1.33465	3	1	unstim	PWM	RRBP1|HGNC Symbol|ribosome binding protein 1 homolog 180kDa (dog) [Source:HGNC Symbol;Acc:10448]|13|ENSBTAG00000015438|ENSBTAT00000061585	58663.8	71526.2	70135	88511.5	71060.8	46741	47227.2	51383.9
ENSBTAP00000026511	19	19	781.83	0.174191	1.06154	1;2	2	PWM	unstim	LNPEP|HGNC Symbol|leucyl/cystinyl aminopeptidase [Source:HGNC Symbol;Acc:6656]|7|ENSBTAG00000019900|ENSBTAT00000026511	1.42659e+06	1.54247e+06	1.50212e+06	1.22856e+06	1.37912e+06	1.67184e+06	1.60536e+06	1.39418e+06
ENSBTAP00000019803	5	5	199.89	0.174493	1.22889	2;3	2	unstim	PWM	CPNS1_BOVIN|UniProtKB/Swiss-Prot|Calpain small subunit 1 [Source:UniProtKB/Swiss-Prot;Acc:P13135]|18|ENSBTAG00000014872|ENSBTAT00000019803	183855	182853	232397	164184	211939	127590	179514	102076
ENSBTAP00000008431	19	18	925.31	0.175032	1.18625	2;3	2	PWM	unstim	ACON_BOVIN|UniProtKB/Swiss-Prot|Aconitate hydratase, mitochondrial [Source:UniProtKB/Swiss-Prot;Acc:P20004]|5|ENSBTAG00000006429|ENSBTAT00000008431	1.3474e+06	1.41358e+06	1.39173e+06	1.52675e+06	1.73595e+06	2.04975e+06	1.47403e+06	1.47753e+06
ENSBTAP00000000085	11	10	441.14	0.176674	1.21407	1;2;3	3	PWM	unstim	ADSL|EntrezGene|adenylosuccinate lyase [Source:RefSeq peptide;Acc:NP_001095847]|5|ENSBTAG00000000077|ENSBTAT00000000085	698889	450417	495321	449145	616666	692228	665386	567713
ENSBTAP00000015793	10	10	321.62	0.177459	1.26856	3	1	unstim	PWM	HCFC1|HGNC Symbol|host cell factor C1 (VP16-accessory protein) [Source:HGNC Symbol;Acc:4839]|X|ENSBTAG00000011904|ENSBTAT00000015793	167266	202320	334344	235470	170708	195760	210966	163092
ENSBTAP00000004312	2	2	79.14	0.177737	1.96398	3	1	PWM	unstim	A5PJU0_BOVIN|UniProtKB/TrEMBL|nucleolar protein 6 [Source:RefSeq peptide;Acc:NP_001092655]|8|ENSBTAG00000003323|ENSBTAT00000004312	20146.6	18358.9	10890.9	22229.6	19656.7	30573.4	57629.1	32813.2
ENSBTAP00000007899	1	1	21.71	0.178031	6.50981	2	1	PWM	unstim	NT5DC3|HGNC Symbol|5'-nucleotidase domain containing 3 [Source:HGNC Symbol;Acc:30826]|5|ENSBTAG00000006013|ENSBTAT00000007899	585.806	23.5202	997.819	1092.66	1729.56	10489.3	3254.46	2101.94
ENSBTAP00000005656	3	2	72.48	0.178961	1.63396	3	1	PWM	unstim	HDLBP|HGNC Symbol|high density lipoprotein binding protein [Source:HGNC Symbol;Acc:4857]|3|ENSBTAG00000004315|ENSBTAT00000005656	29864.6	28690	18524.6	46961.4	47753.6	27956.5	66920.5	60047.3
ENSBTAP00000025116	1	1	33.49	0.179497	1.42936	3	1	PWM	unstim	LRCH3|HGNC Symbol|leucine-rich repeats and calponin homology (CH) domain containing 3 [Source:HGNC Symbol;Acc:28637]|1|ENSBTAG00000032839|ENSBTAT00000025116	3155.16	1984.2	3764.24	2544.39	2607.18	3300.72	6973.33	3482.1
ENSBTAP00000040230	2	2	106.41	0.179893	1.12799	2;3	2	unstim	PWM	A4IFQ5_BOVIN|UniProtKB/TrEMBL|gamma-parvin [Source:RefSeq peptide;Acc:NP_001077274]|5|ENSBTAG00000008057|ENSBTAT00000042594	29143.7	47831.1	40652	36783.8	24037.1	36151.8	38691	38010.1
ENSBTAP00000036252;ENSBTAP00000008948;ENSBTAP00000010255;ENSBTAP00000020622;ENSBTAP00000056163	16	9	785.46	0.180196	1.34374	1;2;3	3	unstim	PWM	F1MC11_BOVIN|UniProtKB/TrEMBL|keratin, type I cytoskeletal 14 [Source:RefSeq peptide;Acc:NP_001160047]|19|ENSBTAG00000007583|ENSBTAT00000036393	1.25511e+06	1.94364e+06	1.50625e+06	1.18011e+06	781868	1.1052e+06	1.94311e+06	549488
ENSBTAP00000020672	1	1	60.84	0.180575	1.15086	2	1	PWM	unstim	Q0P5I7_BOVIN|UniProtKB/TrEMBL|NEDD8-activating enzyme E1 catalytic subunit [Source:RefSeq peptide;Acc:NP_001069042]|22|ENSBTAG00000015556|ENSBTAT00000020672	16416.2	25830.5	25453	19498.8	16501.7	26747.2	29580.9	27523.3
ENSBTAP00000030177	3	2	185.97	0.181081	1.18296	2	1	PWM	unstim	Q6XZP8_BOVIN|UniProtKB/TrEMBL|emerin [Source:RefSeq peptide;Acc:NP_976237]|X|ENSBTAG00000022314|ENSBTAT00000030192	56633.9	79053	66231.1	98230.3	79382.3	109823	77307.8	88549.6
ENSBTAP00000021704	5	5	127.06	0.181558	1.4584	2	1	unstim	PWM	COTL1_BOVIN|UniProtKB/Swiss-Prot|Coactosin-like protein [Source:UniProtKB/Swiss-Prot;Acc:Q2HJ57]|18|ENSBTAG00000016315|ENSBTAT00000021704	233626	328759	252685	413567	247189	271580	167076	156609
ENSBTAP00000006026	3	3	82.3	0.181963	1.19133	3	1	unstim	PWM	PPIH_BOVIN|UniProtKB/Swiss-Prot|Peptidyl-prolyl cis-trans isomerase H [Source:UniProtKB/Swiss-Prot;Acc:Q0P5D0]|3|ENSBTAG00000004590|ENSBTAT00000006026	52555.9	75837.5	52117.7	44451.7	42293	77131.3	29417.5	39992.1
ENSBTAP00000009007;ENSBTAP00000007371	2	2	79.31	0.182217	1.1654	1	1	unstim	PWM	CEACAM8|EntrezGene|carcinoembryonic antigen-related cell adhesion molecule 8 [Source:RefSeq peptide;Acc:NP_991357]|18|ENSBTAG00000005615|ENSBTAT00000009007	148843	166860	138991	147518	122039	188125	97570.7	109008
ENSBTAP00000014027	3	1	151.14	0.182473	1.89017	1;2	2	PWM	unstim	F1N6C2_BOVIN|UniProtKB/TrEMBL|Uncharacterized protein [Source:UniProtKB/TrEMBL;Acc:F1N6C2]|4|ENSBTAG00000010612|ENSBTAT00000014027	11475.9	24778.6	17287.8	8061.18	20323.2	70669.6	15011.1	10436.9
ENSBTAP00000022970	3	2	133.19	0.18265	1.21402	3	1	unstim	PWM	VAPA_BOVIN|UniProtKB/Swiss-Prot|Vesicle-associated membrane protein-associated protein A [Source:UniProtKB/Swiss-Prot;Acc:Q0VCY1]|24|ENSBTAG00000017279|ENSBTAT00000022970	54167.3	92898.5	48070.2	64597.6	59802.1	75259.6	38467.1	40416.9
ENSBTAP00000007163	28	27	1268.56	0.183129	1.08526	1;2;3	3	unstim	PWM	UGGT1|HGNC Symbol|UDP-glucose glycoprotein glucosyltransferase 1 [Source:HGNC Symbol;Acc:15663]|2|ENSBTAG00000005444|ENSBTAT00000007163	1.50177e+06	1.71295e+06	1.38344e+06	1.39068e+06	1.52876e+06	1.42291e+06	1.20859e+06	1.3581e+06
ENSBTAP00000053832	2	2	76.64	0.183146	1.38903	3	1	PWM	unstim	SAMD9|HGNC Symbol|sterile alpha motif domain containing 9 [Source:HGNC Symbol;Acc:1348]|4|ENSBTAG00000012894|ENSBTAT00000061545	5074.1	5749.47	20221.9	6330.71	13092.7	7042.78	17132.3	14648.9
ENSBTAP00000040198	3	2	79.23	0.183609	1.08923	2	1	PWM	unstim	KPRA_BOVIN|UniProtKB/Swiss-Prot|Phosphoribosyl pyrophosphate synthase-associated protein 1 [Source:UniProtKB/Swiss-Prot;Acc:Q08DW2]|19|ENSBTAG00000030172|ENSBTAT00000042563	18391.9	18460.3	17926.8	14682.9	20545.7	17483.7	19933	17697.2
ENSBTAP00000009128	2	2	114.26	0.183676	1.40309	3	1	unstim	PWM	CSN4_BOVIN|UniProtKB/Swiss-Prot|COP9 signalosome complex subunit 4 [Source:UniProtKB/Swiss-Prot;Acc:Q3SZA0]|6|ENSBTAG00000006950|ENSBTAT00000009128	34718.7	33046	17111	32057.3	16078.7	22788.3	19272.5	25200.4
ENSBTAP00000020887	3	3	218.6	0.183694	1.18489	2;3	2	PWM	unstim	A4FUZ2_BOVIN|UniProtKB/TrEMBL|ribonucleoprotein PTB-binding 1 [Source:RefSeq peptide;Acc:NP_001096578]|7|ENSBTAG00000015721|ENSBTAT00000020887	90140	94746.6	120388	163430	95986.1	129844	174537	154995
ENSBTAP00000007028;ENSBTAP00000055935	4	4	325.51	0.185615	1.51772	2;3	2	unstim	PWM	ARPC3_BOVIN|UniProtKB/Swiss-Prot|Actin-related protein 2/3 complex subunit 3 [Source:UniProtKB/Swiss-Prot;Acc:Q3T035]|17|ENSBTAG00000005345|ENSBTAT00000007028	1.26489e+06	3.29978e+06	1.89911e+06	1.43601e+06	1.6491e+06	1.71945e+06	903596	932897
ENSBTAP00000001164	25	24	1040.69	0.186745	1.0335	1;2	2	PWM	unstim	ERAP2_BOVIN|UniProtKB/Swiss-Prot|Endoplasmic reticulum aminopeptidase 2 [Source:UniProtKB/Swiss-Prot;Acc:A6QPT7]|7|ENSBTAG00000039275|ENSBTAT00000001164	1.46072e+06	2.1407e+06	1.03295e+06	1.45559e+06	1.60775e+06	2.12383e+06	1.07827e+06	1.4841e+06
ENSBTAP00000010466	14	14	608.7	0.187005	1.2565	3	1	PWM	unstim	F1MN93_BOVIN|UniProtKB/TrEMBL|Uncharacterized protein [Source:UniProtKB/TrEMBL;Acc:F1MN93]|13|ENSBTAG00000007960|ENSBTAT00000010466	1.76469e+06	2.1305e+06	1.24217e+06	2.0673e+06	2.35504e+06	2.11083e+06	2.36588e+06	2.22088e+06
ENSBTAP00000008146	4	3	129.2	0.187236	1.06296	2;3	2	PWM	unstim	A7E3S8_BOVIN|UniProtKB/TrEMBL|hsc70-interacting protein [Source:RefSeq peptide;Acc:NP_001095396]|5|ENSBTAG00000006202|ENSBTAT00000008146	67038.1	84414.7	73050.1	77066.4	71117.6	93388.3	70301.1	85747.8
ENSBTAP00000008132	22	3	1830.35	0.18798	1.3164	1;2;3	3	unstim	PWM	ACTG_BOVIN|UniProtKB/Swiss-Prot|Actin, cytoplasmic 2Actin, cytoplasmic 2, N-terminally processed [Source:UniProtKB/Swiss-Prot;Acc:P63258]|19|ENSBTAG00000006189|ENSBTAT00000008132	3.12048e+07	4.33203e+07	3.75154e+07	3.48243e+07	2.95305e+07	2.06134e+07	2.71443e+07	3.42772e+07
ENSBTAP00000025473	1	1	24.66	0.189855	1.83453	3	1	PWM	unstim	STUB1|EntrezGene|STIP1 homology and U box-containing protein 1 [Source:RefSeq peptide;Acc:NP_001068634]|25|ENSBTAG00000019136|ENSBTAT00000025473	4040.92	827.115	3246.88	4138.8	4989.26	6690.85	4212.2	6587.44
ENSBTAP00000001378	2	2	56.84	0.189915	1.41704	3	1	unstim	PWM	MAP4K2|HGNC Symbol|mitogen-activated protein kinase kinase kinase kinase 2 [Source:HGNC Symbol;Acc:6864]|29|ENSBTAG00000001037|ENSBTAT00000001378	14350.7	6569.62	8362.18	15860.5	6256.28	3160.69	10376.3	12063.9
ENSBTAP00000001376	2	2	111.34	0.189939	1.43928	3	1	unstim	PWM	A2VDM7_BOVIN|UniProtKB/TrEMBL|splicing factor 1 [Source:RefSeq peptide;Acc:NP_001075083]|29|ENSBTAG00000001035|ENSBTAT00000001376	71752	39086	116361	79144.7	66433.4	36756.4	49077.3	60578
ENSBTAP00000013288;ENSBTAP00000035143	4	4	129.47	0.190064	1.22951	2	1	unstim	PWM	FLOT2_BOVIN|UniProtKB/Swiss-Prot|Flotillin-2 [Source:UniProtKB/Swiss-Prot;Acc:A6QLR4]|19|ENSBTAG00000010073|ENSBTAT00000013288	87496.1	90610.7	100329	86280.8	84614.2	91288.2	72664.6	48069.6
ENSBTAP00000008022	3	3	163.75	0.190433	1.33184	3	1	unstim	PWM	NH2L1_BOVIN|UniProtKB/Swiss-Prot|NHP2-like protein 1 [Source:UniProtKB/Swiss-Prot;Acc:Q3B8S0]|5|ENSBTAG00000006104|ENSBTAT00000008022	239830	545800	243281	135408	185124	491807	79390.7	117894
ENSBTAP00000019134	7	7	178.09	0.190842	1.60779	3	1	PWM	unstim	EIF3I_BOVIN|UniProtKB/Swiss-Prot|Eukaryotic translation initiation factor 3 subunit I [Source:UniProtKB/Swiss-Prot;Acc:Q5E966]|2|ENSBTAG00000014388|ENSBTAT00000019134	80489.5	133291	120503	104128	135790	229534	90763.3	248787
ENSBTAP00000012242	3	3	165.04	0.191164	1.61497	2;3	2	unstim	PWM	EVL|HGNC Symbol|Enah/Vasp-like [Source:HGNC Symbol;Acc:20234]|21|ENSBTAG00000009293|ENSBTAT00000012242	90732.9	111357	154023	130778	89336.2	109792	42506.9	59850.9
ENSBTAP00000028757;ENSBTAP00000055925	8	8	512.37	0.191749	1.08902	2;3	2	unstim	PWM	|||2|ENSBTAG00000021580|ENSBTAT00000028757	1.35215e+06	1.90076e+06	1.52805e+06	1.77729e+06	1.38156e+06	1.7289e+06	1.46349e+06	1.4482e+06
ENSBTAP00000018759	2	2	51.53	0.192379	1.12819	3	1	unstim	PWM	A6QLD1_BOVIN|UniProtKB/TrEMBL|exocyst complex component 4 [Source:RefSeq peptide;Acc:NP_001095677]|4|ENSBTAG00000014112|ENSBTAT00000018759	10798.9	8992.49	13167.8	9643.64	7973.2	7654.02	11879.8	10255.2
ENSBTAP00000015794	1	1	69.86	0.192516	1.13757	2	1	PWM	unstim	A5PKL2_BOVIN|UniProtKB/TrEMBL|ras-related protein R-Ras2 [Source:RefSeq peptide;Acc:NP_001092480]|15|ENSBTAG00000011905|ENSBTAT00000015794	16584	22880	20789.2	22860.4	23885.6	25718.4	22355.4	22587.9
ENSBTAP00000007367	4	4	155.41	0.192566	1.09128	2;3	2	unstim	PWM	DEOC_BOVIN|UniProtKB/Swiss-Prot|Putative deoxyribose-phosphate aldolase [Source:UniProtKB/Swiss-Prot;Acc:Q3T0V9]|5|ENSBTAG00000022167|ENSBTAT00000007367	96561.4	89527.7	91441.7	90229	79244.4	82339.5	96686.3	78728.6
ENSBTAP00000004418	2	2	133.78	0.192628	1.53522	3	1	PWM	unstim	Q2KIQ7_BOVIN|UniProtKB/TrEMBL|pre-mRNA branch site protein p14 [Source:RefSeq peptide;Acc:NP_001039482]|11|ENSBTAG00000003407|ENSBTAT00000004418	56646.9	59335.2	111561	59460.8	103069	140235	79392.4	117918
ENSBTAP00000019929	1	1	22.38	0.19306	1.34303	2	1	PWM	unstim	SC61G_BOVIN|UniProtKB/Swiss-Prot|Protein transport protein Sec61 subunit gamma [Source:UniProtKB/Swiss-Prot;Acc:Q3T104]|22|ENSBTAG00000014971|ENSBTAT00000019929	8939.91	37323.3	14956.4	10758.9	25851.1	31539.7	18946.5	20332.2
ENSBTAP00000017332	1	1	22.36	0.1942	1.70119	2	1	unstim	PWM	F1MC72_BOVIN|UniProtKB/TrEMBL|ubiquitin-conjugating enzyme E2 L3 [Source:RefSeq peptide;Acc:NP_001071562]|17|ENSBTAG00000013038|ENSBTAT00000017332	24712.6	28261	11846.2	31036.2	15884	4162.11	9040.94	27259.4
ENSBTAP00000001855	3	2	122.7	0.194882	1.47353	3	1	unstim	PWM	THOC6|EntrezGene|THO complex subunit 6 homolog [Source:RefSeq peptide;Acc:NP_001098973]|25|ENSBTAG00000001415|ENSBTAT00000001855	47508	43004.6	27598.1	38203.9	20003.4	33689.6	34032.1	18356.2
ENSBTAP00000017739	3	3	161.83	0.194899	1.3269	2	1	unstim	PWM	BAX_BOVIN|UniProtKB/Swiss-Prot|Apoptosis regulator BAX [Source:UniProtKB/Swiss-Prot;Acc:O02703]|18|ENSBTAG00000013340|ENSBTAT00000017739	166585	330702	162298	182246	156705	169673	137726	170329
ENSBTAP00000023612	1	1	46.74	0.194922	1.33741	3	1	unstim	PWM	A8E651_BOVIN|UniProtKB/TrEMBL|RNA-binding protein EWS [Source:RefSeq peptide;Acc:NP_001103270]|17|ENSBTAG00000017755|ENSBTAT00000023612	34674.6	86951.4	32261.2	45084.2	35229.3	56263.5	32084.5	25196.9
ENSBTAP00000005553	9	2	385.55	0.195399	1.33673	2;3	2	PWM	unstim	TMPO|EntrezGene|thymopoietin-2 [Source:RefSeq peptide;Acc:NP_001091474]|5|ENSBTAG00000004240|ENSBTAT00000005553	179587	134097	127584	494705	324878	270880	306388	349003
ENSBTAP00000005626	13	4	555.07	0.195527	1.28404	2;3	2	PWM	unstim	SEP11_BOVIN|UniProtKB/Swiss-Prot|Septin-11 [Source:UniProtKB/Swiss-Prot;Acc:A2VE99]|6|ENSBTAG00000021372|ENSBTAT00000005626	164661	132004	162068	104626	170999	232438	154034	165903
ENSBTAP00000020277	3	2	70.44	0.195602	2.2241	2	1	PWM	unstim	UBR4|HGNC Symbol|ubiquitin protein ligase E3 component n-recognin 4 [Source:HGNC Symbol;Acc:30313]|2|ENSBTAG00000015240|ENSBTAT00000020277	2901.13	2741.74	2357.74	2126.59	4214.28	2271.39	4883.42	11154.8
ENSBTAP00000002872	3	3	136.56	0.195899	1.25915	2	1	PWM	unstim	SPTC1_BOVIN|UniProtKB/Swiss-Prot|Serine palmitoyltransferase 1 [Source:UniProtKB/Swiss-Prot;Acc:Q3MHG1]|8|ENSBTAG00000002220|ENSBTAT00000002872	78724.5	92192.8	102171	80458.1	126687	134344	108919	75216.8
ENSBTAP00000015401	3	3	87.59	0.197444	1.41712	3	1	PWM	unstim	KRR1|EntrezGene|KRR1 small subunit processome component homolog [Source:RefSeq peptide;Acc:NP_001032908]|5|ENSBTAG00000011591|ENSBTAT00000015401	67675.5	26345.7	45591.5	32656.2	71819.4	25465.4	71737.2	75103
ENSBTAP00000023084	6	5	151.01	0.197705	1.16241	2;3	2	unstim	PWM	BAG5_BOVIN|UniProtKB/Swiss-Prot|BAG family molecular chaperone regulator 5 [Source:UniProtKB/Swiss-Prot;Acc:Q2TA08]|21|ENSBTAG00000017361|ENSBTAT00000023084	100695	95537.5	84002.4	107620	78403.3	74803.1	95008.2	85448.5
ENSBTAP00000042908	2	2	70.86	0.199178	1.47093	3	1	PWM	unstim	||Uncharacterized protein [Source:UniProtKB/TrEMBL;Acc:F1MXS1]|11|ENSBTAG00000000152|ENSBTAT00000045527	13788.6	3272.35	19716.7	12460.3	13270.1	4899.65	41064.5	13191.2
ENSBTAP00000011834;ENSBTAP00000056125	7	7	418.36	0.200114	1.29608	2;3	2	PWM	unstim	DRG1_BOVIN|UniProtKB/Swiss-Prot|Developmentally-regulated GTP-binding protein 1 [Source:UniProtKB/Swiss-Prot;Acc:Q3MHP5]|17|ENSBTAG00000008990|ENSBTAT00000011834	230770	267462	163643	253409	221831	301200	332502	330742
ENSBTAP00000006245;ENSBTAP00000017435	2	2	62.43	0.200349	1.71847	2	1	PWM	unstim	GSTO1|EntrezGene|glutathione-S-transferase omega 1 [Source:RefSeq peptide;Acc:NP_001068682]|26|ENSBTAG00000003989|ENSBTAT00000006245	44015.4	14563.8	20703.8	19723.4	60740.1	49220.6	44874.1	15304.8
ENSBTAP00000023628	4	2	137.23	0.200666	1.19351	2;3	2	unstim	PWM	LUC7L2|HGNC Symbol|LUC7-like 2 (S. cerevisiae) [Source:HGNC Symbol;Acc:21608]|4|ENSBTAG00000017770|ENSBTAT00000023628	144642	124934	92547.3	124337	92329	128003	89077.3	98180.3
ENSBTAP00000008756	5	3	152.87	0.200736	2.84179	2;3	2	PWM	unstim	NAA25|HGNC Symbol|N(alpha)-acetyltransferase 25, NatB auxiliary subunit [Source:HGNC Symbol;Acc:25783]|17|ENSBTAG00000006666|ENSBTAT00000008756	2358.23	3619.14	4071.53	2748.34	3697.57	2383.41	17620.3	12665.8
ENSBTAP00000020080	4	4	155.95	0.200759	1.18111	2;3	2	unstim	PWM	LEG1_BOVIN|UniProtKB/Swiss-Prot|Galectin-1 [Source:UniProtKB/Swiss-Prot;Acc:P11116]|5|ENSBTAG00000015089|ENSBTAT00000020080	468291	466648	520840	458082	515706	371801	444528	288360
ENSBTAP00000016153	5	5	266.76	0.201353	1.15641	3	1	unstim	PWM	SMD2_BOVIN|UniProtKB/Swiss-Prot|Small nuclear ribonucleoprotein Sm D2 [Source:UniProtKB/Swiss-Prot;Acc:Q3SZF8]|18|ENSBTAG00000012177|ENSBTAT00000016153	370122	494286	220474	267285	239826	535574	204148	189733
ENSBTAP00000024788	1	1	28.75	0.202652	3.69303	3	1	PWM	unstim	RL29_BOVIN|UniProtKB/Swiss-Prot|60S ribosomal protein L29 [Source:UniProtKB/Swiss-Prot;Acc:Q58DW3]|22|ENSBTAG00000018628|ENSBTAT00000024788	1426.9	8.86012	1017.17	1903.36	5391.73	3979.58	1217.81	5498.77
ENSBTAP00000027556	6	5	247.71	0.202818	8.78531	2;3	2	unstim	PWM	Q9TVA6_BOVIN|UniProtKB/TrEMBL|matrix metalloproteinase-9 precursor [Source:RefSeq peptide;Acc:NP_777169]|13|ENSBTAG00000020676|ENSBTAT00000027556	11022.4	411011	79102.4	59702.9	29152.6	10417.2	14570.4	9698.05
ENSBTAP00000024660	2	1	135.57	0.203061	1.69905	3	1	unstim	PWM	||Uncharacterized protein [Source:UniProtKB/TrEMBL;Acc:E1BHR3]|21|ENSBTAG00000018527|ENSBTAT00000024660	92427.4	175760	237636	81521.8	104329	164430	51040.2	25891.8
ENSBTAP00000017694	2	2	56.46	0.203691	1.53218	2	1	PWM	unstim	A7YWF1_BOVIN|UniProtKB/TrEMBL|acetyl-coenzyme A synthetase, cytoplasmic [Source:RefSeq peptide;Acc:NP_001098809]|13|ENSBTAG00000013303|ENSBTAT00000017694	10389.9	18832.7	13306.3	14115.2	11432.8	16522.1	28293.2	30541.1
ENSBTAP00000017106;ENSBTAP00000024786	5	4	165.99	0.204391	1.26603	2	1	unstim	PWM	A5D9F7_BOVIN|UniProtKB/TrEMBL|sorting nexin 6 [Source:RefSeq peptide;Acc:NP_001039796]|21|ENSBTAG00000012873|ENSBTAT00000017106	103824	108945	132815	121248	116499	96849.8	75419.3	79968.5
ENSBTAP00000032384	2	2	60.9	0.204961	1.23509	2	1	unstim	PWM	SODC_BOVIN|UniProtKB/Swiss-Prot|Superoxide dismutase [Cu-Zn] [Source:UniProtKB/Swiss-Prot;Acc:P00442]|1|ENSBTAG00000018854|ENSBTAT00000032452	19030.5	12792.8	9475.75	9685.16	20020.3	7727.63	9131.49	4400.4
ENSBTAP00000031853	14	13	631.09	0.205184	1.14881	2;3	2	PWM	unstim	RUVBL2|EntrezGene|ruvB-like 2 [Source:RefSeq peptide;Acc:NP_001033615]|18|ENSBTAG00000023417|ENSBTAT00000031907	689708	749057	617707	590484	618471	945568	775531	701278
ENSBTAP00000002344	4	1	155.38	0.20522	1.69941	3	1	PWM	unstim	SAFB|EntrezGene|scaffold attachment factor B1 [Source:RefSeq peptide;Acc:NP_001093185]|7|ENSBTAG00000007875|ENSBTAT00000002344	772.51	951.668	10185.4	751.644	7753.93	1933.82	5211.89	6617
ENSBTAP00000010538	2	2	124.21	0.206219	1.37275	2;3	2	PWM	unstim	F1N719_BOVIN|UniProtKB/TrEMBL|Serine/threonine-protein phosphatase [Source:UniProtKB/TrEMBL;Acc:F1N719]|18|ENSBTAG00000008014|ENSBTAT00000010538	53591.4	32566.9	38659.8	57917	41976.5	56141.4	71474.6	81256.3
ENSBTAP00000020709	1	1	49.7	0.206318	1.32343	2	1	PWM	unstim	SQSTM1|EntrezGene|sequestosome-1 [Source:RefSeq peptide;Acc:NP_788814]|7|ENSBTAG00000015591|ENSBTAT00000020709	7690.26	23171.1	15096.1	19276.9	19370.9	21960	24242.8	20759.5
ENSBTAP00000012029	6	1	170.04	0.206497	1.47398	3	1	unstim	PWM	STAG2|HGNC Symbol|stromal antigen 2 [Source:HGNC Symbol;Acc:11355]|X|ENSBTAG00000009121|ENSBTAT00000012029	48364.9	63430.5	27874.5	38153.1	30694.9	33111.7	37871.4	18963.6
ENSBTAP00000016520	4	4	194.18	0.206596	1.13045	1;2	2	PWM	unstim	Q58DW7_BOVIN|UniProtKB/TrEMBL|HLA class II histocompatibility antigen, DM beta chain [Source:RefSeq peptide;Acc:NP_001035571]|23|ENSBTAG00000012451|ENSBTAT00000016520	201411	453611	113098	163471	300643	449108	135029	168338
ENSBTAP00000029026	5	5	225.01	0.207166	1.20596	2;3	2	unstim	PWM	NDUV1_BOVIN|UniProtKB/Swiss-Prot|NADH dehydrogenase [ubiquinone] flavoprotein 1, mitochondrial [Source:UniProtKB/Swiss-Prot;Acc:P25708]|29|ENSBTAG00000021776|ENSBTAT00000029026	174143	233871	139303	180271	195609	208179	93638.4	105897
ENSBTAP00000022854	26	25	1350.09	0.207286	1.14928	1;2;3	3	unstim	PWM	A5D7E8_BOVIN|UniProtKB/TrEMBL|protein disulfide-isomerase A3 precursor [Source:RefSeq peptide;Acc:NP_776758]|21|ENSBTAG00000017196|ENSBTAT00000022854	1.13048e+07	1.21332e+07	8.74202e+06	8.59917e+06	1.26081e+07	1.03087e+07	5.72389e+06	6.84167e+06
ENSBTAP00000051209	9	9	672.24	0.207631	1.1667	1;2;3	3	unstim	PWM	RPN2_BOVIN|UniProtKB/Swiss-Prot|Dolichyl-diphosphooligosaccharide--protein glycosyltransferase subunit 2 [Source:UniProtKB/Swiss-Prot;Acc:Q3SZI6]|13|ENSBTAG00000014648|ENSBTAT00000057162	1.24865e+06	1.45184e+06	974574	1.22746e+06	1.0005e+06	1.00461e+06	1.01119e+06	1.18575e+06
ENSBTAP00000010347	5	2	126.77	0.208153	1.52826	2	1	unstim	PWM	GNPI1_BOVIN|UniProtKB/Swiss-Prot|Glucosamine-6-phosphate isomerase 1 [Source:UniProtKB/Swiss-Prot;Acc:A4FV08]|7|ENSBTAG00000007865|ENSBTAT00000010347	36746.1	65254.3	71736.4	72736.8	48992.4	31335.9	50947.7	30000.9
ENSBTAP00000044459	1	1	63.36	0.208243	1.82107	2	1	unstim	PWM	Q2KIN2_BOVIN|UniProtKB/TrEMBL|deoxyguanosine kinase, mitochondrial [Source:RefSeq peptide;Acc:NP_001014888]|11|ENSBTAG00000012037|ENSBTAT00000047239	2304.12	9270.78	1696.01	6796.21	259.26	131.419	1106.06	9522.65
ENSBTAP00000013373	7	7	235.12	0.208475	1.47579	3	1	unstim	PWM	CMAS|HGNC Symbol|cytidine monophosphate N-acetylneuraminic acid synthetase [Source:HGNC Symbol;Acc:18290]|5|ENSBTAG00000010136|ENSBTAT00000013373	583514	583392	391976	538298	347225	268234	560183	245413
ENSBTAP00000054517	12	12	688.37	0.209835	1.15457	1;2;3	3	PWM	unstim	A7Z066_BOVIN|UniProtKB/TrEMBL|calnexin [Source:RefSeq peptide;Acc:NP_001099082]|7|ENSBTAG00000048107|ENSBTAT00000064711	2.85632e+06	3.0538e+06	2.68222e+06	3.25456e+06	3.45166e+06	4.2512e+06	2.95858e+06	3.01668e+06
ENSBTAP00000005600;ENSBTAP00000018998;ENSBTAP00000054785	5	4	208.57	0.209843	1.16023	2	1	unstim	PWM	RHOA_BOVIN|UniProtKB/Swiss-Prot|Transforming protein RhoA [Source:UniProtKB/Swiss-Prot;Acc:P61585]|22|ENSBTAG00000004279|ENSBTAT00000005600	416179	735943	660111	470194	421976	652708	449888	442640
ENSBTAP00000026745	2	2	84.69	0.210078	1.1139	2	1	unstim	PWM	NCEH1_BOVIN|UniProtKB/Swiss-Prot|Neutral cholesterol ester hydrolase 1 [Source:UniProtKB/Swiss-Prot;Acc:Q1JQE6]|1|ENSBTAG00000020073|ENSBTAT00000026745	26756.1	51952.3	34654.8	29368.2	17307.6	53284.5	32358.7	25185.3
ENSBTAP00000026189;ENSBTAP00000012764	6	5	176.63	0.210887	1.13358	2;3	2	unstim	PWM	MST4|EntrezGene|serine/threonine-protein kinase MST4 [Source:RefSeq peptide;Acc:NP_001157258]|X|ENSBTAG00000019652|ENSBTAT00000026189	164258	188900	154487	150604	129433	149960	134329	166960
ENSBTAP00000024335	4	4	163.6	0.211232	1.23021	2;3	2	unstim	PWM	Q3ZC41_BOVIN|UniProtKB/TrEMBL|3-ketoacyl-CoA thiolase, peroxisomal [Source:RefSeq peptide;Acc:NP_001029491]|22|ENSBTAG00000018283|ENSBTAT00000024335	98627	166240	98615.3	127607	106686	105951	91521	95032.6
ENSBTAP00000015848	17	12	600.49	0.211412	1.17562	3	1	unstim	PWM	TPR|HGNC Symbol|translocated promoter region (to activated MET oncogene) [Source:HGNC Symbol;Acc:12017]|16|ENSBTAG00000011943|ENSBTAT00000015848	296237	347743	294787	205676	173856	377295	266878	155449
ENSBTAP00000044292;ENSBTAP00000056345	4	4	143.72	0.211896	1.41956	2	1	PWM	unstim	Q3T0J4_BOVIN|UniProtKB/TrEMBL|heme oxygenase (decycling) 2 [Source:RefSeq peptide;Acc:NP_001030259]|25|ENSBTAG00000018937|ENSBTAT00000047056	39640.3	96928.2	66313.2	44831.4	112671	90505.4	71531	76937.5
ENSBTAP00000029114;ENSBTAP00000045488	2	2	49.07	0.212459	1.05183	1	1	unstim	PWM	FCGR2_BOVIN|UniProtKB/Swiss-Prot|Low affinity immunoglobulin gamma Fc region receptor II [Source:UniProtKB/Swiss-Prot;Acc:Q28110]|3|ENSBTAG00000021842|ENSBTAT00000029114	24042.8	146166	50520.1	17978.2	20814.6	161017	30807	14306.5
ENSBTAP00000026568	3	3	188.87	0.213804	1.05409	3	1	PWM	unstim	F1N4Q2_BOVIN|UniProtKB/TrEMBL|methionine aminopeptidase 2 [Source:RefSeq peptide;Acc:NP_001035583]|5|ENSBTAG00000019944|ENSBTAT00000026568	88278.6	100806	108642	93220.5	94460.1	102195	107578	107861
ENSBTAP00000021204	2	2	89.97	0.21408	1.52658	3	1	unstim	PWM	A4FUE3_BOVIN|UniProtKB/TrEMBL|retinoblastoma-binding protein 5 [Source:RefSeq peptide;Acc:NP_001076871]|16|ENSBTAG00000015946|ENSBTAT00000021204	50211.2	30753.2	33914.5	33877	15160.9	33230.4	32482.7	16569.6
ENSBTAP00000013320	40	40	1970.14	0.214422	1.0917	1;2;3	3	PWM	unstim	PTPRC|HGNC Symbol|protein tyrosine phosphatase, receptor type, C [Source:HGNC Symbol;Acc:9666]|16|ENSBTAG00000023144|ENSBTAT00000013320	2.7506e+07	3.74892e+07	3.98913e+07	2.42483e+07	2.76929e+07	4.34e+07	3.92661e+07	3.06173e+07
ENSBTAP00000023581	6	6	230.03	0.214943	1.55192	2	1	PWM	unstim	CA2|EntrezGene|carbonic anhydrase 2 [Source:RefSeq peptide;Acc:NP_848667]|14|ENSBTAG00000017733|ENSBTAT00000023581	806054	24820.1	12514.9	62329.1	1.10625e+06	131890	126039	41421.1
ENSBTAP00000011748	2	2	101.12	0.215712	1.30315	3	1	unstim	PWM	E1BIN9_BOVIN|UniProtKB/TrEMBL|Uncharacterized protein [Source:UniProtKB/TrEMBL;Acc:E1BIN9]|15|ENSBTAG00000008925|ENSBTAT00000011748	57525.7	60041	39398.3	39066.3	30153.9	45093.1	48033.9	27147.6
ENSBTAP00000041860	1	1	108.05	0.216074	1.87052	2;3	2	PWM	unstim	THIO_BOVIN|UniProtKB/Swiss-Prot|Thioredoxin [Source:UniProtKB/Swiss-Prot;Acc:O97680]|8|ENSBTAG00000002953|ENSBTAT00000044356	81466	61401.9	122460	105776	231107	232554	149228	81268.9
ENSBTAP00000026715	7	7	424.67	0.216157	1.14633	2;3	2	unstim	PWM	A6H797_BOVIN|UniProtKB/TrEMBL|malectin [Source:RefSeq peptide;Acc:NP_001092453]|17|ENSBTAG00000020050|ENSBTAT00000026715	263142	335756	263063	323258	291190	299212	206960	236567
ENSBTAP00000052294	8	2	436.72	0.216343	1.18903	1;2;3	3	unstim	PWM	||Uncharacterized protein [Source:UniProtKB/TrEMBL;Acc:E1B822]|4|ENSBTAG00000037510|ENSBTAT00000055206	21791.6	7743.55	10807.6	11903.8	17822.1	4775.04	7179.73	14163.9
ENSBTAP00000000993	3	3	229.62	0.2176	1.01666	1	1	unstim	PWM	AQP1_BOVIN|UniProtKB/Swiss-Prot|Aquaporin-1 [Source:UniProtKB/Swiss-Prot;Acc:P47865]|4|ENSBTAG00000000745|ENSBTAT00000000993	2.44745e+06	132484	146723	233273	2.14799e+06	149501	264114	349828
ENSBTAP00000002894	3	3	200.51	0.217969	1.12021	2;3	2	unstim	PWM	|||4|ENSBTAG00000039928|ENSBTAT00000002894	1.10309e+06	1.10576e+06	1.11319e+06	64854.1	1.05646e+06	721813	1.19982e+06	45351.3
ENSBTAP00000004245	2	2	78.39	0.218596	1.30179	2;3	2	PWM	unstim	NDUAA_BOVIN|UniProtKB/Swiss-Prot|NADH dehydrogenase [ubiquinone] 1 alpha subcomplex subunit 10, mitochondrial [Source:UniProtKB/Swiss-Prot;Acc:P34942]|3|ENSBTAG00000003279|ENSBTAT00000004245	10879	12773.5	13965.4	14945.6	18090	19839.8	11422.3	19074.6
ENSBTAP00000037577;ENSBTAP00000021166	15	15	999.45	0.218852	1.14953	1;2;3	3	unstim	PWM	G3P_BOVIN|UniProtKB/Swiss-Prot|Glyceraldehyde-3-phosphate dehydrogenase [Source:UniProtKB/Swiss-Prot;Acc:P10096]|5|ENSBTAG00000014731|ENSBTAT00000037753	1.96915e+07	2.26721e+07	2.49412e+07	2.49604e+07	2.11718e+07	2.11212e+07	1.78153e+07	2.01548e+07
ENSBTAP00000034709	16	16	755.63	0.219577	1.17354	2;3	2	unstim	PWM	FMNL1|HGNC Symbol|formin-like 1 [Source:HGNC Symbol;Acc:1212]|19|ENSBTAG00000004196|ENSBTAT00000034825	1.08047e+06	1.05503e+06	1.33015e+06	1.24319e+06	1.16559e+06	974123	1.05526e+06	817531
ENSBTAP00000002065	1	1	76.55	0.22025	1.19584	2	1	PWM	unstim	ADPGK_BOVIN|UniProtKB/Swiss-Prot|ADP-dependent glucokinase [Source:UniProtKB/Swiss-Prot;Acc:A2VE47]|10|ENSBTAG00000001578|ENSBTAT00000002065	15322.6	15432.5	17105	15882	19390	24028.2	16740.7	16066.2
ENSBTAP00000003868	2	1	41.46	0.221246	2.46295	3	1	PWM	unstim	INTS6|HGNC Symbol|integrator complex subunit 6 [Source:HGNC Symbol;Acc:14879]|12|ENSBTAG00000002970|ENSBTAT00000003868	2400.34	0	8096.81	1520.98	5154.14	1722.71	15835.9	6887.25
ENSBTAP00000055014	3	3	112	0.222944	1.49364	1	1	unstim	PWM	P2RY8|HGNC Symbol|purinergic receptor P2Y, G-protein coupled, 8 [Source:HGNC Symbol;Acc:15524]|X|ENSBTAG00000047839|ENSBTAT00000065049	145400	40563.5	101427	95920.2	89109.5	54715.5	51988.6	60815.6
ENSBTAP00000038273	1	1	21.63	0.223023	1.32831	2	1	PWM	unstim	68MP_BOVIN|UniProtKB/Swiss-Prot|6.8 kDa mitochondrial proteolipid [Source:UniProtKB/Swiss-Prot;Acc:P14790]|21|ENSBTAG00000026886|ENSBTAT00000038460	9795.69	18281.7	14818.5	12332.9	18752.3	25635.2	18603.9	10369.4
ENSBTAP00000013500	2	2	73.61	0.223307	1.69064	3	1	PWM	unstim	CPSF2_BOVIN|UniProtKB/Swiss-Prot|Cleavage and polyadenylation specificity factor subunit 2 [Source:UniProtKB/Swiss-Prot;Acc:Q10568]|21|ENSBTAG00000010227|ENSBTAT00000013500	15846.6	1003.76	8764.34	16728.2	11916.3	8062.03	31281.6	20326.5
ENSBTAP00000016473	2	2	69.19	0.223309	6.12525	3	1	PWM	unstim	URB1|HGNC Symbol|URB1 ribosome biogenesis 1 homolog (S. cerevisiae) [Source:HGNC Symbol;Acc:17344]|1|ENSBTAG00000012412|ENSBTAT00000016473	1029.58	1306.13	12394.1	69.0419	10285.5	680.743	38026.9	41653.7
ENSBTAP00000055621	1	1	30.36	0.223891	1.44701	2;3	2	PWM	unstim	NAA10|HGNC Symbol|N(alpha)-acetyltransferase 10, NatA catalytic subunit [Source:HGNC Symbol;Acc:18704]|X|ENSBTAG00000047702|ENSBTAT00000064306	13256.9	11855.1	8518.9	15993.1	12005	27819.5	15422.2	16559.4
ENSBTAP00000016453	2	2	117.67	0.225174	1.16932	1	1	unstim	PWM	APOC3_BOVIN|UniProtKB/Swiss-Prot|Apolipoprotein C-III [Source:UniProtKB/Swiss-Prot;Acc:P19035]|15|ENSBTAG00000012398|ENSBTAT00000016453	251406	377528	209149	225553	192704	400118	194943	121854
ENSBTAP00000011000	1	1	29.09	0.225176	1.08972	1	1	PWM	unstim	Q95KW2_BOVIN|UniProtKB/TrEMBL|ADP-ribosyltransferase 4 [Source:UniProtKB/TrEMBL;Acc:B2BAM0]|5|ENSBTAG00000008352|ENSBTAT00000011000	19126.4	2810.3	1636.84	2209.98	18229.8	2834.28	2504.74	4528.08
ENSBTAP00000003926	1	1	34.02	0.225227	1.68901	3	1	PWM	unstim	MBD3|EntrezGene|methyl-CpG-binding domain protein 3 [Source:RefSeq peptide;Acc:NP_001121977]|7|ENSBTAG00000038409|ENSBTAT00000003926	8208.83	8621.99	9376.28	7400.4	6904.35	25906.9	14394.4	9557.73
ENSBTAP00000053509	4	4	194.93	0.225534	1.31705	3	1	PWM	unstim	TCERG1|HGNC Symbol|transcription elongation regulator 1 [Source:HGNC Symbol;Acc:15630]|7|ENSBTAG00000003259|ENSBTAT00000061039	43424.7	29777.3	54052.8	82634.9	55815.3	76114.7	71654.1	72852
ENSBTAP00000006650	1	1	63.9	0.226095	1.26171	2	1	unstim	PWM	SMEK1|HGNC Symbol|SMEK homolog 1, suppressor of mek1 (Dictyostelium) [Source:HGNC Symbol;Acc:20219]|21|ENSBTAG00000005040|ENSBTAT00000006650	11249.9	6264.41	6218.02	9903.4	5568.54	4079.57	5178.15	11832.6
ENSBTAP00000004145	11	11	453.51	0.226518	1.39185	2	1	PWM	unstim	Q3MHK9_BOVIN|UniProtKB/TrEMBL|fascin [Source:RefSeq peptide;Acc:NP_001030217]|25|ENSBTAG00000003191|ENSBTAT00000004145	159331	278262	197731	394080	456485	364465	257395	354427
ENSBTAP00000008473	4	4	223.76	0.226641	1.20368	2;3	2	unstim	PWM	F1MEQ3_BOVIN|UniProtKB/TrEMBL|dihydrolipoyllysine-residue succinyltransferase component of 2-oxoglutarate dehydrogenase complex, mitochondrial [Source:RefSeq peptide;Acc:NP_001068750]|10|ENSBTAG00000006463|ENSBTAT00000008473	303276	286696	293054	253395	243416	328328	168212	204163
ENSBTAP00000004032	3	3	77.79	0.226792	4.00456	2	1	unstim	PWM	DENND4C|HGNC Symbol|DENN/MADD domain containing 4C [Source:HGNC Symbol;Acc:26079]|8|ENSBTAG00000003097|ENSBTAT00000004032	459486	29183.2	70743.8	64402.3	44598.9	38442.1	40957.1	31778.5
ENSBTAP00000056049	1	1	34.26	0.226979	1.10588	1	1	unstim	PWM	IGLL1|EntrezGene|immunoglobulin lambda-like polypeptide 1 [Source:RefSeq peptide;Acc:NP_001077269]|17|ENSBTAG00000031160|ENSBTAT00000065780	37055.1	44090.7	13695.3	25296.2	30936.4	45952	8208.42	23537.9
ENSBTAP00000010242	3	3	138.95	0.22749	1.25712	2	1	PWM	unstim	HIBCH|HGNC Symbol|3-hydroxyisobutyryl-CoA hydrolase [Source:HGNC Symbol;Acc:4908]|2|ENSBTAG00000007787|ENSBTAT00000010242	36688.3	54765.9	52097.3	54473.8	55760.7	77665.3	71340.4	44176.1
ENSBTAP00000050022	2	2	65.9	0.228105	1.015	1	1	unstim	PWM	PLVAP|EntrezGene|plasmalemma vesicle-associated protein [Source:RefSeq peptide;Acc:NP_001030430]|7|ENSBTAG00000005434|ENSBTAT00000052388	43112.4	3690.26	5387.56	2841.38	37736.8	5738.43	5913.98	4829.41
ENSBTAP00000028608	10	10	466.82	0.228192	1.15203	2;3	2	PWM	unstim	PSMD3_BOVIN|UniProtKB/Swiss-Prot|26S proteasome non-ATPase regulatory subunit 3 [Source:UniProtKB/Swiss-Prot;Acc:Q2KJ46]|19|ENSBTAG00000021461|ENSBTAT00000028608	770612	609746	588826	646207	717329	832819	790900	671971
ENSBTAP00000008508;ENSBTAP00000003589	8	4	384.32	0.228376	1.24861	1;2;3	3	unstim	PWM	GBB2_BOVIN|UniProtKB/Swiss-Prot|Guanine nucleotide-binding protein G(I)/G(S)/G(T) subunit beta-2 [Source:UniProtKB/Swiss-Prot;Acc:P11017]|25|ENSBTAG00000006495|ENSBTAT00000008508	282906	303253	334686	359899	251964	339473	243144	191153
ENSBTAP00000025800	10	9	352.19	0.228721	1.20976	2;3	2	unstim	PWM	A5PJW8_BOVIN|UniProtKB/TrEMBL|DNA-directed RNA polymerase II subunit RPB2 [Source:RefSeq peptide;Acc:NP_001092552]|6|ENSBTAG00000019366|ENSBTAT00000025800	196333	174883	174013	169626	126826	120240	212447	131394
ENSBTAP00000009771	22	22	1040.75	0.229867	1.50671	2;3	2	PWM	unstim	MYBBP1A|HGNC Symbol|MYB binding protein (P160) 1a [Source:HGNC Symbol;Acc:7546]|19|ENSBTAG00000007430|ENSBTAT00000009771	887652	1.16722e+06	651923	816651	944517	1.33364e+06	2.04054e+06	990115
ENSBTAP00000016194	8	2	354.44	0.230065	3.44642	1;2	2	PWM	unstim	F1MZQ5_BOVIN|UniProtKB/TrEMBL|Uncharacterized protein [Source:UniProtKB/TrEMBL;Acc:F1MZQ5]|23|ENSBTAG00000012208|ENSBTAT00000016194	1758.73	24912.3	24349.6	4263.09	52253.2	43135.9	92323.6	2817.92
ENSBTAP00000016863	1	1	29.62	0.230737	3.11006	3	1	PWM	unstim	GTF2E2|EntrezGene|general transcription factor IIE subunit 2 [Source:RefSeq peptide;Acc:NP_001039530]|27|ENSBTAG00000012691|ENSBTAT00000016863	1440.2	0	1809.28	1528.98	2923.78	2180.08	3835.83	5921.61
ENSBTAP00000015758	3	3	113.12	0.231282	1.57724	3	1	unstim	PWM	MORC3|HGNC Symbol|MORC family CW-type zinc finger 3 [Source:HGNC Symbol;Acc:23572]|1|ENSBTAG00000011876|ENSBTAT00000015758	28728.7	53847.9	19714.2	18568.6	20199.9	19854.4	27882.9	8689.91
ENSBTAP00000006279	3	3	66.64	0.231301	1.16039	2	1	unstim	PWM	Q1RMJ1_BOVIN|UniProtKB/TrEMBL|protein tyrosine phosphatase receptor type C-associated protein [Source:RefSeq peptide;Acc:NP_001040083]|29|ENSBTAG00000004782|ENSBTAT00000006279	126528	235636	142542	122456	115352	170280	123119	131726
ENSBTAP00000003904	23	22	827.6	0.231339	1.28578	3	1	unstim	PWM	SMCHD1|HGNC Symbol|structural maintenance of chromosomes flexible hinge domain containing 1 [Source:HGNC Symbol;Acc:29090]|24|ENSBTAG00000003354|ENSBTAT00000003904	743033	788688	610804	506707	421684	490984	812974	334766
ENSBTAP00000010628	4	4	146.24	0.2317	1.13217	1;2;3	3	PWM	unstim	SEL1L|HGNC Symbol|sel-1 suppressor of lin-12-like (C. elegans) [Source:HGNC Symbol;Acc:10717]|10|ENSBTAG00000008083|ENSBTAT00000010628	56853.6	67983.5	44115.4	57201.4	67062.2	76236.7	60557.2	52188.3
ENSBTAP00000031165	1	1	46.83	0.233563	1.33236	1;3	2	unstim	PWM	IGLL1|EntrezGene|immunoglobulin lambda-like polypeptide 1 [Source:RefSeq peptide;Acc:NP_001077269]|17|ENSBTAG00000031160|ENSBTAT00000031209	48123	2381.79	17140.7	22178.8	37426.1	2839.05	10090.1	17062.2
ENSBTAP00000021699	1	1	31.95	0.233732	1.33507	2	1	unstim	PWM	Q2KJ66_BOVIN|UniProtKB/TrEMBL|V-type proton ATPase subunit D [Source:RefSeq peptide;Acc:NP_001068609]|10|ENSBTAG00000016309|ENSBTAT00000021699	44711.1	52356	58201.9	61988.7	54105.1	43502.6	37119.1	28004.5
ENSBTAP00000001830	3	3	165.86	0.234377	1.35752	1;2;3	3	unstim	PWM	TMED9_BOVIN|UniProtKB/Swiss-Prot|Transmembrane emp24 domain-containing protein 9 [Source:UniProtKB/Swiss-Prot;Acc:Q3T133]|7|ENSBTAG00000001394|ENSBTAT00000001830	102514	131372	62545.3	66693.5	106480	53528.4	57275.5	50206.8
ENSBTAP00000027346	3	3	192.82	0.234467	1.06982	2;3	2	unstim	PWM	SEC31A|HGNC Symbol|SEC31 homolog A (S. cerevisiae) [Source:HGNC Symbol;Acc:17052]|6|ENSBTAG00000020525|ENSBTAT00000027346	150470	174657	195932	152374	153881	159736	191695	124170
ENSBTAP00000000992	1	1	47.31	0.234544	1.6585	3	1	PWM	unstim	GAR1|EntrezGene|H/ACA ribonucleoprotein complex subunit 1 [Source:RefSeq peptide;Acc:NP_001030380]|6|ENSBTAG00000000748|ENSBTAT00000000992	8803.03	17498.1	69064.3	8600.8	47522.1	50642.9	29400.1	44862.5
ENSBTAP00000008186	1	1	31.98	0.234777	2.74816	3	1	PWM	unstim	INTS3|HGNC Symbol|integrator complex subunit 3 [Source:HGNC Symbol;Acc:26153]|3|ENSBTAG00000006235|ENSBTAT00000008186	4729.04	0	10615.7	4601.83	9960.52	2827.57	28873.8	13154.5
ENSBTAP00000003514	1	1	24.22	0.234828	1.24967	3	1	unstim	PWM	A1XEA8_BOVIN|UniProtKB/TrEMBL|NEDD8 precursor [Source:RefSeq peptide;Acc:NP_777189]|10|ENSBTAG00000038842|ENSBTAT00000003514	60682.3	69905.5	32501.8	49219.5	33379.2	57166.6	34470.9	44875.8
ENSBTAP00000020642	1	1	60.6	0.235409	1.43973	3	1	unstim	PWM	LEMD2|HGNC Symbol|LEM domain containing 2 [Source:HGNC Symbol;Acc:21244]|23|ENSBTAG00000015538|ENSBTAT00000020642	43280.6	68536	31979	42889.7	32498.5	31080.5	42497.6	23590.7
ENSBTAP00000005408	2	1	72.9	0.236252	1.20764	2	1	unstim	PWM	RAP2C_BOVIN|UniProtKB/Swiss-Prot|Ras-related protein Rap-2c [Source:UniProtKB/Swiss-Prot;Acc:Q08DI5]|X|ENSBTAG00000004131|ENSBTAT00000005408	9315.57	15819.4	12529.4	13780.8	10264.1	14919.5	7517.24	9899.05
ENSBTAP00000018076	4	3	183.85	0.237077	1.32264	3	1	PWM	unstim	A6H788_BOVIN|UniProtKB/TrEMBL|U2 small nuclear ribonucleoprotein A' [Source:RefSeq peptide;Acc:NP_001092418]|21|ENSBTAG00000013593|ENSBTAT00000018076	83121.4	80461.7	138341	94276.8	127815	131938	102675	161604
[truncated: 992 more rows]
