# Supplementary material for: Bovine Peripheral Blood Derived Lymphocyte Proteome and Secretome Show Divergent Reaction of Bovine Immune Phenotypes after Stimulation with Pokeweed Mitogen
Source: Proteomes. 2022 Feb 8;10(1):7. doi: 10.3390/proteomes10010007 (PMC8883952; doi:10.3390/proteomes10010007)
Supplement: Supplementary file 1 [file proteomes-10-00007-s001.zip › Table S2_identified proteins of cellular dataset_ratio2 p005_Kleinwort et al.xlsx]

## Sheet: Suppl Tab 2
Supplemental Table S2: Proteins identified in cellular mass spectrometry dataset with statistically significant (p ≤ 0.05) abundance changes and biologically relevant fold changes (ratio ≥ 2) after PWM stimulation in lymphocytes of both immune phenotypes (1), exclusively in control lymphocytes (2) or exclusively in lymphocytes of ID cows (3). (a) Protein names as listed in Ensembl protein databas…
1) Up in controls and immune Deviants
Description a	Gene Symbol b	Protein ID c	Unique Peptides d	p Value e	Ratio Ctr (PWM/unstim) f	Ratio Ctr (PWM/unstim) g
Importin subunit alpha-2	KPNA2	ENSBTAP00000016216	2	0.004	18.8	93.2
GB1/RHD3-type G domain-containing protein	GBP6	ENSBTAP00000052801	2	0.006	13.9	7.8
Cystathionine beta-synthase	CBS	ENSBTAP00000000184	3	0.006	10.9	19.6
Bifunctional methylenetetrahydrofolate dehydrogenase/cyclohydrolase. mitochondrial	MTHFD2	ENSBTAP00000006419	2	0.003	10.7	5.8
Pyrroline-5-carboxylate reductase 1. mitochondrial	PYCR1	ENSBTAP00000000046	3	0.006	9.3	6.5
Polyadenylate-binding protein	PABPC4	ENSBTAP00000022761	2	0.005	8.8	4.8
Ras GTPase-activating protein-binding protein 1	G3BP1	ENSBTAP00000027067	5	0.027	7.9	3.9
phosphoserine aminotransferase	PSAT1	ENSBTAP00000018554	10	0.001	7.2	8.5
TNF receptor superfamily member 4	TNFRSF4	ENSBTAP00000020764	2	0.016	6.3	39.5
60S ribosomal protein L37a	RPL37A	ENSBTAP00000005015	2	0.009	6.3	3.7
GB1/RHD3-type G domain-containing protein	GBP1	ENSBTAP00000032626	7	0.011	6.3	3.7
Tryptophan--tRNA ligase. cytoplasmic	WARS1	ENSBTAP00000006139	17	0.002	5.8	3.8
GB1/RHD3-type G domain-containing protein	GBP6	ENSBTAP00000019785	9	0.003	5.3	3.6
E3 ubiquitin-protein ligase UHRF1	UHRF1	ENSBTAP00000042353	5	0.009	4.7	12.3
HECT and RLD domain containing E3 ubiquitin protein ligase family member 6	HERC6	ENSBTAP00000027362	2	0.005	4.6	3.0
Inorganic pyrophosphatase	PPA1	ENSBTAP00000010311	13	0.001	4.6	4.6
40S ribosomal protein S10	RPS10	ENSBTAP00000020719	4	0.033	4.4	2.4
MCM domain-containing protein	MCM4	ENSBTAP00000052820	11	0.018	4.4	5.0
Monofunctional C1-tetrahydrofolate synthase. mitochondrial	MTHFD1L	ENSBTAP00000052260	12	0.001	4.3	5.1
Ras GTPase-activating protein-binding protein 2	G3BP2	ENSBTAP00000018663	3	0.038	4.2	2.1
Ubiquitin-like protein ISG15	ISG15	ENSBTAP00000019573	2	0.016	4.2	2.5
Asparagine synthetase [glutamine-hydrolyzing]	ASNS	ENSBTAP00000004181	14	0.005	4.1	4.9
NEDD8 ultimate buster 1	NUB1	ENSBTAP00000005970	6	0.000	4.1	4.9
DNA replication licensing factor MCM5	MCM5	ENSBTAP00000020715	17	0.006	3.8	4.8
Farnesyl pyrophosphate synthase	FDPS	ENSBTAP00000014472	2	0.009	3.8	2.2
DNA helicase	MCM2	ENSBTAP00000019121	20	0.009	3.8	4.9
GB1/RHD3-type G domain-containing protein	GBP1	ENSBTAP00000023500	6	0.004	3.7	2.9
ATP-dependent RNA helicase DHX30	DHX30	ENSBTAP00000030598	3	0.045	3.6	5.7
GB1/RHD3-type G domain-containing protein	GBP4	ENSBTAP00000052397	5	0.001	3.6	3.2
Eukaryotic translation initiation factor 2 subunit 2	EIF2S2	ENSBTAP00000007832	5	0.006	3.4	2.8
Interferon stimulated exonuclease gene 20kDa	ISG20	ENSBTAP00000019639	6	0.009	3.4	2.3
DNA replication licensing factor MCM6	MCM6	ENSBTAP00000048625	12	0.009	3.4	4.4
Interferon induced protein 44 like	IFI44L	ENSBTAP00000031029	2	0.005	3.4	2.5
Nucleolar complex protein 3 homolog	NOC3L	ENSBTAP00000015105	3	0.010	3.3	8.9
AARS protein	AARS1	ENSBTAP00000026393	18	0.001	3.3	4.0
DNA (cytosine-5)-methyltransferase 1	DNMT1	ENSBTAP00000003549	10	0.041	3.2	4.7
Phosphoenolpyruvate carboxykinase 2. mitochondrial	PCK2	ENSBTAP00000015834	9	0.002	3.2	3.1
Ribosomal_L23eN domain-containing protein	RPL23	ENSBTAP00000028781	2	0.045	3.2	4.0
Ubiquitin-like modifier-activating enzyme 7	UBA7	ENSBTAP00000016365	4	0.004	3.1	2.4
Phosphoserine phosphatase	PSPH	ENSBTAP00000017392	4	0.024	3.1	4.0
T-complex protein 1 subunit zeta	CCT6A	ENSBTAP00000010765	8	0.011	3.0	2.2
Ribonucleoside-diphosphate reductase M1 chain	RRM1	ENSBTAP00000017428	10	0.015	3.0	4.3
DNA replication licensing factor MCM7	MCM7	ENSBTAP00000003728	17	0.009	3.0	4.4
RNA polymerase II-associated factor 1 homolog	PAF1	ENSBTAP00000027224	2	0.004	3.0	2.7
Beta-2-microglobulin	B2M	ENSBTAP00000016359	4	0.004	2.9	2.8
Structural maintenance of chromosomes protein 4	SMC4	ENSBTAP00000007705	8	0.041	2.9	5.0
Heat shock protein HSP 90-beta	HSP90AB1	ENSBTAP00000001034	6	0.004	2.9	3.3
Branched-chain-amino-acid aminotransferase	BCAT1	ENSBTAP00000018370	2	0.006	2.9	4.3
Intercellular adhesion molecule 1 precursor	ICAM1	ENSBTAP00000013608	11	0.028	2.8	3.4
Structural maintenance of chromosomes 2	SMC2	ENSBTAP00000011562	2	0.033	2.8	3.2
GARS protein	GARS1	ENSBTAP00000025254	5	0.003	2.8	4.5
Cyclin-dependent kinase 1	CDK1	ENSBTAP00000013337	3	0.043	2.8	3.4
Interleukin-2 receptor subunit alpha	IL2RA	ENSBTAP00000027834	9	0.030	2.8	30.0
CD83 antigen	CD83	ENSBTAP00000042033	2	0.033	2.8	86.8
DnaJ homolog subfamily A member 1	DNAJA1	ENSBTAP00000021637	4	0.021	2.7	2.8
DNA replication licensing factor MCM3	MCM3	ENSBTAP00000014194	22	0.018	2.7	4.2
TIA1 cytotoxic granule-associated RNA binding protein 1	TIAL1	ENSBTAP00000005331	3	0.049	2.7	2.0
Eukaryotic translation initiation factor 4 gamma 2	EIF4G2	ENSBTAP00000049614	2	0.006	2.7	2.3
Interferon-induced protein 44	IFI44	ENSBTAP00000045648	2	0.020	2.7	4.8
Tumor necrosis factor receptor superfamily. member 18	TNFRSF18	ENSBTAP00000020759	3	0.024	2.6	14.4
GB1/RHD3-type G domain-containing protein	GBP4	ENSBTAP00000019081	2	0.003	2.6	2.5
Tumor necrosis factor ligand superfamily member 8	TNFSF8	ENSBTAP00000036314	4	0.009	2.6	6.0
Neutral amino acid transporter B(0)	SLC1A5	ENSBTAP00000018050	9	0.028	2.6	23.4
ACPS domain-containing protein	AASDHPPT	ENSBTAP00000040011	2	0.001	2.6	2.2
Polycomb protein EED	EED	ENSBTAP00000010324	2	0.026	2.5	4.8
Solute carrier family 3. member 2	SLC3A2	ENSBTAP00000017614	19	0.015	2.5	7.5
Midasin	MDN1	ENSBTAP00000002157	2	0.048	2.5	17.3
Neutral amino acid transporter A	SLC1A4	ENSBTAP00000010206	3	0.023	2.5	13.9
Ras-related protein Rap-1A	RAP1A	ENSBTAP00000019575	2	0.042	2.5	2.8
P2X purinoceptor	P2RX7	ENSBTAP00000011779	9	0.021	2.5	7.0
Signaling lymphocytic activation molecule family member 1	SLAMF1	ENSBTAP00000010425	3	0.024	2.5	9.6
Intercellular adhesion molecule 3	ICAM3	ENSBTAP00000020903	6	0.001	2.5	2.5
Signal transducer and activator of transcription 3	STAT3	ENSBTAP00000028687	10	0.002	2.5	2.9
Serine hydroxymethyltransferase. mitochondrial	SHMT2	ENSBTAP00000038059	13	0.026	2.4	3.4
Pyrroline-5-carboxylate reductase 2	PYCR2	ENSBTAP00000000047	3	0.010	2.4	2.2
Uncharacterized protein	ACOT7	ENSBTAP00000028254	4	0.009	2.4	2.1
Ubiquitin-like modifier-activating enzyme 5	UBA5	ENSBTAP00000005894	2	0.021	2.4	3.0
CD69	CD69	ENSBTAP00000002767	7	0.013	2.4	5.7
CD166 antigen	ALCAM	ENSBTAP00000000097	10	0.006	2.4	4.5
Eukaryotic translation initiation factor 3 subunit H	EIF3H	ENSBTAP00000018645	7	0.041	2.3	2.8
Putative helicase MOV-10	MOV10	ENSBTAP00000018997	9	0.010	2.3	3.5
DNA polymerase delta catalytic subunit	POLD1	ENSBTAP00000014714	2	0.024	2.3	2.6
Peptidyl-prolyl cis-trans isomerase FKBP4	FKBP4	ENSBTAP00000009998	12	0.006	2.3	3.0
Similar to ribosomal protein L21Uncharacterized protein	RPL21	ENSBTAP00000002160	3	0.012	2.3	2.5
Leucyl-tRNA synthetase	LARS1	ENSBTAP00000008902	15	0.001	2.3	2.2
ATP-binding cassette transporter subfamily B member 1	ABCB4	ENSBTAP00000020806	7	0.012	2.3	4.7
Eukaryotic translation initiation factor 5B	EIF5B	ENSBTAP00000034522	13	0.003	2.2	2.6
Elongation factor 1-delta	EEF1D	ENSBTAP00000019499	4	0.002	2.2	2.8
40S ribosomal protein S7	RPS7	ENSBTAP00000021587	7	0.001	2.2	2.5
Inducible T-cell costimulator	ICOS	ENSBTAP00000028775	4	0.021	2.2	8.1
Cysteinyl-tRNA synthetase. cytoplasmic	CARS1	ENSBTAP00000014273	10	0.011	2.2	2.5
Isoleucyl-tRNA synthetase. cytoplasmic	IARS1	ENSBTAP00000001290	14	0.010	2.2	2.7
Solute carrier family 38 member 1	SLC38A1	ENSBTAP00000001147	2	0.033	2.1	16.2
Proliferating cell nuclear antigen	PCNA	ENSBTAP00000007967	7	0.028	2.1	2.7
60S ribosomal protein L23	RPL23	ENSBTAP00000004190	4	0.001	2.1	2.1
Threonine--tRNA ligase 1. cytoplasmic	TARS1	ENSBTAP00000018947	19	0.001	2.1	2.5
Sodium/potassium-transporting ATPase subunit beta-3	ATP1B3	ENSBTAP00000018795	4	0.010	2.1	2.0
Tubulin-specific chaperone D	TBCD	ENSBTAP00000020484	3	0.000	2.1	2.1
60S ribosomal protein L27a	RPL27A	ENSBTAP00000007036	4	0.002	2.0	2.1
60S ribosomal protein L27	RPL27	ENSBTAP00000023183	3	0.005	2.0	2.3
Carbamoyl-phosphate synthetase 2. aspartate transcarbamylase. and dihydroorotase	CAD	ENSBTAP00000023783	12	0.021	2.0	2.6
Formin binding protein 1	FNBP1	ENSBTAP00000027072	6	0.001	2.0	2.1
Uncharacterized protein	ACAD10	ENSBTAP00000011801	2	0.046	2.0	6.9
Nuclear migration protein nudC	NUDC	ENSBTAP00000005789	3	0.017	2.0	2.5
Eukaryotic translation initiation factor 4 gamma 1	EIF4G1	ENSBTAP00000032150	8	0.005	2.0	2.6
Solute carrier family 29 member 1	SLC29A1	ENSBTAP00000035821	4	0.039	2.0	12.2
Dedicator of cytokinesis 10	DOCK10	ENSBTAP00000037982	8	0.001	2.0	2.1
2) Up in controls
Description a	Gene Symbol b	Protein ID c	Unique Peptides d	p Value e	Ratio Ctr (PWM/unstim) f	Ratio Ctr (PWM/unstim) g
Calcyclin-binding protein	CACYBP	ENSBTAP00000001464	4	0.033	3.6	1.9
Cytosol aminopeptidase	LAP3	ENSBTAP00000007860	22	0.032	3.3	1.9
PfkB domain-containing protein	ADK	ENSBTAP00000014702	4	0.022	2.8	1.7
Leucine-rich repeat-containing protein 59	LRRC59	ENSBTAP00000007978	7	0.017	2.6	1.8
Chloride intracellular channel protein 4	CLIC4	ENSBTAP00000048950	5	0.020	2.6	1.8
Amidophosphoribosyltransferase	PPAT	ENSBTAP00000047788	2	0.016	2.6	1.8
Histone H1.2	H1-2	ENSBTAP00000015499	2	0.023	2.6	1.5
Splicing factor U2AF 35 kDa subunit	U2AF1	ENSBTAP00000015465	2	0.030	2.4	1.7
Histone H1.1	H1-1	ENSBTAP00000055553	2	0.029	2.3	1.4
ELAV-like protein 1	ELAVL1	ENSBTAP00000000805	6	0.002	2.3	1.9
Heterogeneous nuclear ribonucleoprotein A1	HNRNPA1	ENSBTAP00000002033	6	0.048	2.3	1.8
Synaptotagmin binding. cytoplasmic RNA interacting protein	SYNCRIP	ENSBTAP00000008774	10	0.010	2.3	1.7
Nicotinamide phosphoribosyltransferase	NAMPT	ENSBTAP00000020608	6	0.005	2.3	1.9
Mitochondrial import inner membrane translocase subunit TIM50 precursor	TIMM50	ENSBTAP00000031959	3	0.040	2.3	1.4
Obg-like ATPase 1	OLA1	ENSBTAP00000009160	6	0.053	2.3	1.4
Coproporphyrinogen oxidase	CPOX	ENSBTAP00000005398	2	0.026	2.3	1.7
RALY heterogeneous nuclear ribonucleoprotein	RALY	ENSBTAP00000041837	2	0.020	2.2	1.8
Inosine-5'-monophosphate dehydrogenase 2	IMPDH2	ENSBTAP00000025179	10	0.014	2.1	1.7
Histidyl-tRNA synthetase. cytoplasmic	HARS1	ENSBTAP00000025094	9	0.003	2.1	1.8
Heat shock protein 75 kDa. mitochondrial	TRAP1	ENSBTAP00000026786	6	0.016	2.1	1.7
Hypoxia up-regulated 1	HYOU1	ENSBTAP00000013636	17	0.004	2.1	1.8
Parkinson disease protein 7 homolog	PARK7	ENSBTAP00000027339	2	0.028	2.1	1.4
60S ribosomal protein L36	RPL36	ENSBTAP00000002349	3	0.025	2.1	1.6
Purine nucleoside phosphorylase	PNP	ENSBTAP00000016346	7	0.027	2.0	1.8
Interferon-induced GTP-binding protein Mx1	MX1	ENSBTAP00000012035	2	0.019	2.0	1.7
Polyadenylate-binding protein 1	PABPC1	ENSBTAP00000056644	9	0.038	2.0	1.4
N-alpha-acetyltransferase 50	NAA50	ENSBTAP00000031032	2	0.020	2.0	1.8
3) Up in immune deviants
Description a	Gene Symbol b	Protein ID c	Unique Peptides d	p Value e	Ratio Ctr (PWM/unstim) f	Ratio Ctr (PWM/unstim) g
CD200	CD200	ENSBTAP00000027169	2	0.041	1.9	6.9
Replication factor C subunit 5	RFC5	ENSBTAP00000009392	2	0.035	1.9	4.3
Importin-4	IPO4	ENSBTAP00000036318	7	0.025	1.9	4.0
Semaphorin-4A	SEMA4A	ENSBTAP00000016223	7	0.023	1.8	3.9
UTP3. small subunit (SSU) processome component. homolog (S. cerevisiae)	UTP3	ENSBTAP00000048599	3	0.031	1.6	3.7
N-acetyltransferase 10	NAT10	ENSBTAP00000022271	9	0.048	1.5	3.5
DDX21 protein	DDX21	ENSBTAP00000019351	25	0.034	1.9	3.4
Replication factor C subunit 4	RFC4	ENSBTAP00000043171	3	0.027	1.8	3.0
Leucine-rich PPR-motif containing	LRPPRC	ENSBTAP00000021773	24	0.017	1.9	2.8
Tumor necrosis factor receptor superfamily member 6	FAS	ENSBTAP00000014282	7	0.008	1.8	2.8
GTP-binding protein 1	GTPBP1	ENSBTAP00000013635	2	0.052	1.4	2.7
Nucleolar protein 1. 120kDa	NOP2	ENSBTAP00000019607	5	0.043	1.7	2.7
Histone PARylation factor 1	HPF1	ENSBTAP00000026815	2	0.013	1.9	2.7
Glucosamine (UDP-N-acetyl)-2-epimerase/N-acetylmannosamine kinase	GNE	ENSBTAP00000001520	3	0.010	1.9	2.6
BOLA class I histocompatibility antigen. alpha chain BL3-7	HLA-E	ENSBTAP00000031126	6	0.020	1.6	2.6
60S ribosomal protein L3	RPL3	ENSBTAP00000004188	10	0.013	1.6	2.5
Transmembrane protein 87A	TMEM87A	ENSBTAP00000011671	2	0.028	1.5	2.5
Syntaxin 11	STX11	ENSBTAP00000056178	2	0.050	1.4	2.5
Transferrin receptor (p90. CD71)	TFRC	ENSBTAP00000043726	16	0.027	1.5	2.5
Guanine monphosphate synthetase	GMPS	ENSBTAP00000017301	7	0.031	1.5	2.4
BoLA protein	HLA-E	ENSBTAP00000031125	2	0.048	1.4	2.4
Peptidyl-prolyl cis-trans isomerase D	PPID	ENSBTAP00000022180	4	0.016	1.7	2.4
TSR1 ribosome maturation factor	TSR1	ENSBTAP00000005534	6	0.030	1.5	2.3
Basigin	BSG	ENSBTAP00000039862	12	0.022	1.5	2.3
Eukaryotic translation initiation factor 5	EIF5	ENSBTAP00000030260	6	0.014	1.9	2.3
Coiled-coil domain-containing protein	CCDC47	ENSBTAP00000015705	2	0.003	1.7	2.3
60S ribosomal protein L35	RPL35	ENSBTAP00000004161	2	0.020	1.9	2.3
Heat shock protein 105 kDa	HSPH1	ENSBTAP00000006600	11	0.004	1.9	2.3
MTHFD1 protein	MTHFD1	ENSBTAP00000012704	19	0.015	1.8	2.3
60S ribosomal protein L15	RPL15	ENSBTAP00000044213	6	0.010	1.6	2.3
Dipeptidyl peptidase IV	DPP4	ENSBTAP00000049191	3	0.039	1.3	2.2
Importin 5	IPO5	ENSBTAP00000053578	16	0.026	1.8	2.2
ATP binding cassette subfamily F member 1	ABCF1	ENSBTAP00000009098	8	0.011	1.9	2.2
Histone acetyltransferase type B catalytic subunit	HAT1	ENSBTAP00000013355	2	0.017	1.8	2.2
Delta-1-pyrroline-5-carboxylate synthase	ALDH18A1	ENSBTAP00000015703	6	0.032	1.5	2.2
Eukaryotic initiation factor 4A-I	EIF4A1	ENSBTAP00000000144	13	0.003	1.8	2.2
Activator of 90 kDa heat shock protein ATPase homolog 1	AHSA1	ENSBTAP00000035425	4	0.014	1.7	2.2
Serotransferrin	TF	ENSBTAP00000009564	19	0.020	1.5	2.1
ATP-binding cassette sub-family E member 1	ABCE1	ENSBTAP00000045734	5	0.008	1.6	2.1
G-protein coupled receptor 183	GPR183	ENSBTAP00000007471	4	0.007	1.5	2.1
Mannosyl (alpha-1.6-)-glycoprotein beta-1.2-N-acetylglucosaminyltransferase	MGAT2	ENSBTAP00000045192	3	0.040	1.4	2.1
DEAD (Asp-Glu-Ala-Asp) box polypeptide 3. X-linked	DDX3X	ENSBTAP00000047104	17	0.021	1.4	2.1
60 kDa heat shock protein. mitochondrial	HSPD1	ENSBTAP00000016708	31	0.041	1.5	2.1
Tyrosyl-tRNA synthetase. cytoplasmic	YARS1	ENSBTAP00000024051	10	0.001	1.9	2.1
60S ribosomal protein L8	RPL8	ENSBTAP00000037200	2	0.029	1.6	2.1
G1 to S phase transition 1	GSPT1	ENSBTAP00000004656	6	0.005	1.6	2.0
AMICA1 protein	JAML	ENSBTAP00000021233	4	0.032	1.6	2.0
Mitochondrial-processing peptidase subunit beta	PMPCB	ENSBTAP00000004922	2	0.018	1.6	2.0
D-3-phosphoglycerate dehydrogenase	PHGDH	ENSBTAP00000008907	17	0.033	1.5	2.0
ATPase family AAA domain-containing protein 3	ATAD3A	ENSBTAP00000012676	2	0.040	1.5	2.0
Glycylpeptide N-tetradecanoyltransferase 1	NMT1	ENSBTAP00000007950	7	0.026	1.4	2.0
Switch-associated protein 70	SWAP70	ENSBTAP00000002578	3	0.005	1.6	2.0
40S ribosomal protein S27	RPS27	ENSBTAP00000018414	2	0.004	1.7	2.0
Importin 7	IPO7	ENSBTAP00000039739	8	0.021	1.5	2.0
Ig-like domain-containing protein	HLA-E	ENSBTAP00000021451	7	0.008	1.5	2.0
Kinectin 1	KTN1	ENSBTAP00000041243	12	0.001	1.7	2.0
CD44 antigen	CD44	ENSBTAP00000015381	10	0.010	1.5	2.0
40S ribosomal protein S8	RPS8	ENSBTAP00000020326	6	0.008	1.7	2.0
40S ribosomal protein S23	RPS23	ENSBTAP00000017770	3	0.000	1.9	2.0
