# Supplementary material for: Bovine Peripheral Blood Derived Lymphocyte Proteome and Secretome Show Divergent Reaction of Bovine Immune Phenotypes after Stimulation with Pokeweed Mitogen
Source: Proteomes. 2022 Feb 8;10(1):7. doi: 10.3390/proteomes10010007 (PMC8883952; doi:10.3390/proteomes10010007)
Supplement: Supplementary file 1 [file proteomes-10-00007-s001.zip › Table S3_cellular data pathway enrichment analysis_Kleinwort et al.xlsx]

## Sheet: Suppl Tab 3
Supplemental Table S3: Pathway enrichment analysis of cellular PBMC dataset. Functional enrichment showing 30 most significant categories of biological processes (GO terms). Hierarchical clustering was performed with ShinyGO software v0.741 using human orthologue gene names of higher abundant PBMC proteins after PWM stimulation of lymphocytes from controls and immune deviant cows. Table shows dat…
1) Up in controls
Enrichment FDR a	Biological process b	Genes in list c	Total genes d	Genes e
8.4159e-05	Organonitrogen compound biosynthetic process	13	1905	CPOX PPAT RPL36 HARS1 IMPDH PARK7 ELAVL1 SYNCRIP PNP PABPC1 PBEF1 ADK TRAP1
0.000113043	Purine nucleoside monophosphate metabolic process	4	46	PNP PPAT ADK IMPDH
0.000113043	Purine ribonucleoside monophosphate metabolic process	4	43	PNP PPAT ADK IMPDH
0.000250501	Ribonucleoside monophosphate metabolic process	4	60	PNP PPAT ADK IMPDH
0.000461518	Nucleoside monophosphate metabolic process	4	80	PNP PPAT ADK IMPDH
0.000461518	Purine nucleoside monophosphate biosynthetic process	3	23	PPAT ADK IMPDH
0.000461518	Purine ribonucleoside monophosphate biosynthetic process	3	21	PPAT ADK IMPDH
0.000461518	Purine nucleoside biosynthetic process	3	25	IMPDH ADK PNP
0.000461518	Ribonucleoside biosynthetic process	3	25	IMPDH ADK PNP
0.000461518	Purine ribonucleoside biosynthetic process	3	25	IMPDH ADK PNP
0.000465062	Regulation of intrinsic apoptotic signaling pathway in response to hydrogen peroxide	2	3	PARK7 TRAP1
0.000465062	Negative regulation of intrinsic apoptotic signaling pathway in response to hydrogen peroxide	2	3	PARK7 TRAP1
0.000583953	RNA splicing, via transesterification reactions	6	403	U2AF1L5 PABPC1 RALY SYNCRIP HNRNPA1 ELAVL1
0.000583953	RNA splicing, via transesterification reactions with bulged adenosine as nucleophile	6	400	U2AF1L5 PABPC1 RALY SYNCRIP HNRNPA1 ELAVL1
0.000583953	MRNA splicing, via spliceosome	6	400	U2AF1L5 PABPC1 RALY SYNCRIP HNRNPA1 ELAVL1
0.000738103	Nucleoside metabolic process	4	111	IMPDH PNP PPAT ADK
0.000766464	Ribonucleoside monophosphate biosynthetic process	3	35	PPAT ADK IMPDH
0.000977646	Intrinsic apoptotic signaling pathway in response to hydrogen peroxide	2	5	PARK7 TRAP1
0.000977646	Negative regulation of hydrogen peroxide-mediated programmed cell death	2	5	PARK7 TRAP1
0.00105609	Nucleoside biosynthetic process	3	41	IMPDH ADK PNP
0.001091	Nucleoside monophosphate biosynthetic process	3	44	PPAT ADK IMPDH
0.001091	Nucleotide biosynthetic process	5	285	PPAT IMPDH PBEF1 ADK PNP
0.001091	Negative regulation of cellular catabolic process	5	278	SYNCRIP ELAVL1 PABPC1 PARK7 PBEF1
0.001091	Negative regulation of gene silencing	3	44	H1-1 H1-2 ELAVL1
0.00109364	Nucleoside phosphate biosynthetic process	5	290	PPAT IMPDH PBEF1 ADK PNP
0.00109364	Glycosyl compound metabolic process	4	140	IMPDH PNP PPAT ADK
0.00109364	Glycosyl compound biosynthetic process	3	45	IMPDH ADK PNP
0.00122905	RNA splicing	6	513	U2AF1L5 PABPC1 RALY SYNCRIP HNRNPA1 ELAVL1
0.00134314	Purine ribonucleoside salvage	2	7	ADK PNP
0.00194591	Nucleotide metabolic process	6	567	PARK7 PPAT IMPDH PNP PBEF1 ADK
2) Up in immune deviants
Enrichment FDR a	Biological process b	Genes in list c	Total genes d	Genes e
7.11395e-10	Translational initiation	12	229	EIF5 EIF4A1 ABCE1 DDX3X ABCF1 RPL3 RPL35 RPS8 RPL8 RPL15 RPS27 RPS23
1.41183e-09	Translation	17	752	GTPBP1 EIF5 GSPT1 RPL8 EIF4A1 ABCE1 RPL15 RPS23 RPL3 RPL35 RPS8 RPS27 NAT10 DDX3X ABCF1 YARS LRPPRC
1.41183e-09	Viral process	20	1158	BSG RANBP5 TFRC AHSA1 HSPD1 EIF4A1 ABCE1 PPID DPP4 IPO7 HLA-E DDX3X RPL3 RPL35 RPS8 RPL8 MGAT2 RPL15 RPS27 RPS23
1.93371e-09	Ribosome biogenesis	13	367	RPL3 NOP2 UTP3 NAT10 RPL35 RPS8 ABCE1 TSR1 RPS27 DDX21 DDX3X RPL8 RPL15
1.93371e-09	Peptide biosynthetic process	17	783	GTPBP1 EIF5 GSPT1 RPL8 EIF4A1 ABCE1 RPL15 RPS23 RPL3 RPL35 RPS8 RPS27 NAT10 DDX3X ABCF1 YARS LRPPRC
2.49121e-09	Biological process involved in symbiotic interaction	20	1241	BSG RANBP5 TFRC AHSA1 HSPD1 EIF4A1 ABCE1 PPID DPP4 IPO7 HLA-E DDX3X RPL3 RPL35 RPS8 RPL8 MGAT2 RPL15 RPS27 RPS23
3.319e-09	Cytoplasmic translation	10	169	EIF5 GSPT1 RPL8 EIF4A1 RPL15 RPL3 RPL35 RPS8 RPS27 RPS23
9.38086e-09	Ribonucleoprotein complex biogenesis	14	535	RPL3 EIF5 NOP2 UTP3 NAT10 RPL35 RPS8 ABCE1 TSR1 RPS27 DDX21 DDX3X RPL8 RPL15
9.68521e-09	Organonitrogen compound biosynthetic process	23	1905	GTPBP1 EIF5 GSPT1 NMT1 RPL8 EIF4A1 GMPS ABCE1 MGAT2 RPL15 RPS23 RPL3 RPL35 RPS8 RPS27 MTHFD1 NAT10 DDX3X ABCF1 ALDH18A1 PHGDH YARS LRPPRC
1.64457e-08	Amide biosynthetic process	17	950	GTPBP1 EIF5 GSPT1 RPL8 EIF4A1 ABCE1 RPL15 RPS23 RPL3 RPL35 RPS8 RPS27 NAT10 DDX3X ABCF1 YARS LRPPRC
1.81622e-08	Peptide metabolic process	17	962	GTPBP1 EIF5 GSPT1 RPL8 EIF4A1 ABCE1 RPL15 RPS23 RPL3 RPL35 RPS8 RPS27 NAT10 DDX3X ABCF1 YARS LRPPRC
1.99935e-08	Cellular amide metabolic process	19	1281	GTPBP1 EIF5 GSPT1 RPL8 EIF4A1 ABCE1 RPL15 RPS23 RPL3 RPL35 RPS8 RPS27 NAT10 DDX3X ABCF1 YARS LRPPRC MTHFD1 GNE
2.24286e-08	RRNA processing	11	295	NOP2 UTP3 NAT10 RPL35 RPS8 TSR1 DDX21 RPS27 RPL3 RPL8 RPL15
3.18132e-08	RRNA metabolic process	11	307	NOP2 UTP3 NAT10 RPL35 RPS8 TSR1 DDX21 RPS27 RPL3 RPL8 RPL15
5.88879e-08	Establishment of protein localization	23	2139	RANBP5 PMPCB STX11 HSPD1 ABCE1 IPO7 IPO4 TFRC CD200 CCDC47 BSG KTN1 PPID TF RPL3 NMT1 RPL35 RPS8 RPL8 RPL15 RPS27 RPS23 DPP4
1.16478e-07	Protein transport	22	2015	RANBP5 PMPCB STX11 HSPD1 ABCE1 IPO7 IPO4 TFRC CD200 BSG KTN1 PPID TF RPL3 NMT1 RPL35 RPS8 RPL8 RPL15 RPS27 RPS23 DPP4
1.78601e-07	Peptide transport	22	2068	RANBP5 PMPCB STX11 HSPD1 ABCE1 IPO7 IPO4 TFRC CD200 BSG KTN1 PPID TF RPL3 NMT1 RPL35 RPS8 RPL8 RPL15 RPS27 RPS23 DPP4
1.78601e-07	Establishment of protein localization to organelle	13	588	RANBP5 PMPCB HSPD1 IPO7 IPO4 RPL3 NMT1 RPL35 RPS8 RPL8 RPL15 RPS27 RPS23
2.21292e-07	Amide transport	22	2104	RANBP5 PMPCB STX11 HSPD1 ABCE1 IPO7 IPO4 TFRC CD200 BSG KTN1 PPID TF RPL3 NMT1 RPL35 RPS8 RPL8 RPL15 RPS27 RPS23 DPP4
2.22099e-07	NcRNA metabolic process	13	604	NOP2 UTP3 NAT10 RPL35 RPS8 TSR1 YARS DDX21 DDX3X RPS27 RPL3 RPL8 RPL15
2.25741e-07	NcRNA processing	12	490	NOP2 UTP3 NAT10 RPL35 RPS8 TSR1 DDX21 DDX3X RPS27 RPL3 RPL8 RPL15
2.68843e-07	Nuclear-transcribed mRNA catabolic process, nonsense-mediated decay	8	147	GSPT1 RPL3 RPL35 RPS8 RPL8 RPL15 RPS27 RPS23
3.50573e-07	Protein localization to organelle	16	1063	RANBP5 PMPCB HSPD1 IPO7 IPO4 CCDC47 TFRC DDX3X RPL3 NMT1 RPL35 RPS8 RPL8 RPL15 RPS27 RPS23
4.55032e-07	Nitrogen compound transport	23	2433	RANBP5 PMPCB STX11 HSPD1 ABCE1 IPO7 IPO4 TFRC CD200 BSG KTN1 LRPPRC PPID TF RPL3 NMT1 RPL35 RPS8 RPL8 RPL15 RPS27 RPS23 DPP4
4.61377e-07	Biological process involved in interspecies interaction between organisms	24	2667	TF BSG HLA-E DDX3X RANBP5 TFRC AHSA1 HSPD1 EIF4A1 ABCE1 DDX21 PPID DPP4 IPO7 ATAD3A CD44 RPL3 RPL35 RPS8 RPL8 MGAT2 RPL15 RPS27 RPS23
7.14217e-07	Protein localization	25	2970	RANBP5 PMPCB STX11 HSPD1 ABCE1 IPO7 IPO4 TFRC CD200 CCDC47 BSG KTN1 SWAP70 PPID DDX3X TF RPL3 NMT1 RPL35 RPS8 RPL8 RPL15 RPS27 RPS23 DPP4
8.6587e-07	SRP-dependent cotranslational protein targeting to membrane	7	112	RPL3 RPL35 RPS8 RPL8 RPL15 RPS27 RPS23
1.20115e-06	Cotranslational protein targeting to membrane	7	118	RPL3 RPL35 RPS8 RPL8 RPL15 RPS27 RPS23
2.03968e-06	Protein targeting to ER	7	128	RPL3 RPL35 RPS8 RPL8 RPL15 RPS27 RPS23
2.27249e-06	Macromolecule localization	26	3421	RANBP5 PMPCB STX11 HSPD1 ABCE1 IPO7 IPO4 TFRC CD200 CCDC47 BSG KTN1 SWAP70 LRPPRC PPID DDX3X TF RPL3 NMT1 RPL35 RPS8 RPL8 RPL15 RPS27 RPS23 DPP4
3) Up in controls and immune deviants
Enrichment FDR a	Biological process b	Genes in list c	Total genes d	Genes e
8.48758e-12	Translation	25	752	AARS1 GARS1 TARS1 EIF2S2 LARS1 WARS1 IARS1 EEF1D CARS RPL21 RPS10 RPL23 RPL27 EIF3H RPL27A RPS7 RPL37A EIF4G2 EIF4G1 MOV10 EIF5B STAT3 HEL-S-51e PABPC4 HEL-S-66p
1.06585e-11	Peptide biosynthetic process	25	783	AARS1 GARS1 TARS1 EIF2S2 LARS1 WARS1 IARS1 EEF1D CARS RPL21 RPS10 RPL23 RPL27 EIF3H RPL27A RPS7 RPL37A EIF4G2 EIF4G1 MOV10 EIF5B STAT3 HEL-S-51e PABPC4 HEL-S-66p
2.41609e-11	Cellular amide metabolic process	30	1281	AARS1 ACOT7 GARS1 TARS1 EIF2S2 LARS1 WARS1 HEL-S-51e IARS1 EEF1D CARS RPL21 RPS10 RPL23 RPL27 EIF3H RPL27A RPS7 RPL37A EIF4G2 EIF4G1 MOV10 EIF5B STAT3 ASNS MTHFD2 PABPC4 MTHFD1L AASDHPPT HEL-S-66p
2.41609e-11	Organonitrogen compound biosynthetic process	36	1905	BCAT1 ASNS CAD AARS1 GARS1 TARS1 EIF2S2 LARS1 PSAT1 WARS1 PYCR2 PSPH AASDHPPT HEL-S-51e PYCR1 IARS1 EEF1D CARS RPL21 RPS10 RPL23 RPL27 EIF3H RPL27A RPS7 RPL37A ACOT7 EIF4G2 EIF4G1 MTHFD1L MOV10 EIF5B CBS STAT3 PABPC4 HEL-S-66p
4.11167e-11	Amide biosynthetic process	26	950	AARS1 GARS1 TARS1 EIF2S2 LARS1 WARS1 IARS1 EEF1D CARS RPL21 RPS10 RPL23 RPL27 EIF3H RPL27A RPS7 RPL37A EIF4G2 EIF4G1 MOV10 EIF5B STAT3 ASNS HEL-S-51e PABPC4 HEL-S-66p
7.09075e-11	Pre-replicative complex assembly involved in nuclear cell cycle DNA replication	6	8	MCM2 MCM6 MCM5 MCM4 MCM3 MCM7
7.09075e-11	Cellular amino acid metabolic process	18	391	BCAT1 ASNS CAD AARS1 GARS1 TARS1 LARS1 PSAT1 WARS1 PYCR2 PSPH AASDHPPT CBS HEL-S-51e PYCR1 IARS1 CARS HEL-S-66p
7.09075e-11	Pre-replicative complex assembly involved in cell cycle DNA replication	6	8	MCM2 MCM6 MCM5 MCM4 MCM3 MCM7
2.38056e-10	Peptide metabolic process	25	962	AARS1 GARS1 TARS1 EIF2S2 LARS1 WARS1 IARS1 EEF1D CARS RPL21 RPS10 RPL23 RPL27 EIF3H RPL27A RPS7 RPL37A EIF4G2 EIF4G1 MOV10 EIF5B STAT3 HEL-S-51e PABPC4 HEL-S-66p
1.84479e-09	Double-strand break repair via break-induced replication	6	12	MCM2 MCM6 MCM5 MCM4 MCM3 MCM7
3.20532e-09	Carboxylic acid metabolic process	25	1094	BCAT1 ASNS CAD AARS1 ACOT7 GARS1 TARS1 LARS1 PSAT1 WARS1 PYCR2 PSPH AASDHPPT CBS HEL-S-51e PYCR1 IARS1 CARS PCK2 MTHFD1L STAT3 P2RX7 MTHFD2 ACAD10 HEL-S-66p
5.55978e-09	Oxoacid metabolic process	25	1127	BCAT1 ASNS CAD AARS1 ACOT7 GARS1 TARS1 LARS1 PSAT1 WARS1 PYCR2 PSPH AASDHPPT CBS HEL-S-51e PYCR1 IARS1 CARS PCK2 MTHFD1L STAT3 P2RX7 MTHFD2 ACAD10 HEL-S-66p
7.57792e-09	Organic acid metabolic process	25	1159	BCAT1 ASNS CAD AARS1 ACOT7 GARS1 TARS1 LARS1 PSAT1 WARS1 PYCR2 PSPH AASDHPPT CBS HEL-S-51e PYCR1 IARS1 CARS PCK2 MTHFD1L STAT3 P2RX7 MTHFD2 ACAD10 HEL-S-66p
7.57792e-09	Cellular amino acid biosynthetic process	9	73	BCAT1 ASNS PSAT1 PYCR2 PSPH AASDHPPT HEL-S-51e PYCR1 CBS
7.57792e-09	Viral process	25	1158	ISG20 ICAM1 EED SLC1A5 EIF4G1 SLAMF1 PCNA G3BP2 DKFZp686L1159 MOV10 FDPS STAT3 CDK1 KPNA2 TNFRSF4 ISG15 HSP90AB1 RPL21 RPS10 RPL23 RPL27 RPL27A RPS7 RPL37A B2M
7.57792e-09	Alpha-amino acid biosynthetic process	9	72	ASNS CAD PSAT1 PYCR2 PSPH AASDHPPT HEL-S-51e PYCR1 CBS
3.02155e-08	Biological process involved in symbiotic interaction	25	1241	ISG20 ICAM1 EED SLC1A5 EIF4G1 SLAMF1 PCNA G3BP2 DKFZp686L1159 MOV10 FDPS STAT3 CDK1 KPNA2 TNFRSF4 ISG15 HSP90AB1 RPL21 RPS10 RPL23 RPL27 RPL27A RPS7 RPL37A B2M
4.58026e-08	Cytoplasmic translation	11	169	EIF2S2 RPL21 RPS10 RPL23 RPL27 RPL27A RPS7 RPL37A AARS1 EIF3H EIF4G1
4.65845e-08	TRNA aminoacylation for protein translation	8	61	AARS1 GARS1 TARS1 LARS1 WARS1 IARS1 CARS HEL-S-66p
7.16426e-08	Translational initiation	12	229	EIF2S2 EIF3H EIF4G2 EIF5B EIF4G1 RPL21 RPS10 RPL23 RPL27 RPL27A RPS7 RPL37A
7.16426e-08	TRNA aminoacylation	8	65	AARS1 GARS1 TARS1 LARS1 WARS1 IARS1 CARS HEL-S-66p
7.30941e-08	Biological process involved in interspecies interaction between organisms	36	2667	GBP1 GBP4 ISG20 HEL-S-51e GBP6 ICAM1 IFI44L ISG15 PAF1 EED SLC1A5 TNFSF8 EIF4G1 SLAMF1 PCNA IFI44 G3BP2 DKFZp686L1159 MOV10 FDPS STAT3 CDK1 KPNA2 TNFRSF4 NUB1 HSP90AB1 P2RX7 ICAM3 RPL21 RPS10 RPL23 RPL27 RPL27A RPS7 RPL37A B2M
7.36769e-08	Amino acid activation	8	66	AARS1 GARS1 TARS1 LARS1 WARS1 IARS1 CARS HEL-S-66p
9.01997e-08	Nuclear DNA replication	8	68	MCM2 MCM6 MCM5 MCM4 MCM3 MCM7 PCNA POLD1
1.38142e-07	Cell cycle DNA replication	8	72	MCM2 MCM6 MCM5 MCM4 MCM3 MCM7 PCNA POLD1
1.85695e-07	NcRNA metabolic process	17	604	AARS1 GARS1 TARS1 LARS1 WARS1 RPS7 IARS1 CARS MDN1 ISG20 RPL27 STAT3 RPL21 RPL23 RPL27A HEL-S-66p RPL37A
2.36662e-07	DNA replication initiation	7	49	MCM2 MCM5 MCM4 MCM3 MCM7 NOC3L MCM6
4.85576e-07	Response to stress	48	4769	POLD1 MCM2 MCM6 HSP90AB1 MCM5 MCM4 MCM3 GBP1 PCNA IL2RA GBP4 MCM7 STAT3 CDK1 ISG20 UBA7 HEL-S-51e GBP6 TNFRSF4 PCK2 ASNS UBA5 DNAJA1 SLAMF1 IFI44L ISG15 B2M CAD ICAM1 TNFSF8 SLC29A1 EIF4G1 G3BP2 DKFZp686L1159 UHRF1 NUB1 LARS1 PYCR2 MOV10 CBS PYCR1 P2RX7 FKBP4 ICAM3 PABPC4 CD83 TIAL1 KPNA2
3.45891e-06	Organic acid biosynthetic process	12	333	BCAT1 ASNS CAD ACOT7 PSAT1 PYCR2 PSPH AASDHPPT HEL-S-51e PYCR1 MTHFD1L CBS
1.75339e-05	L-serine metabolic process	4	12	PSAT1 PSPH HEL-S-51e CBS
