# Supplementary material for: Bovine Peripheral Blood Derived Lymphocyte Proteome and Secretome Show Divergent Reaction of Bovine Immune Phenotypes after Stimulation with Pokeweed Mitogen
Source: Proteomes. 2022 Feb 8;10(1):7. doi: 10.3390/proteomes10010007 (PMC8883952; doi:10.3390/proteomes10010007)
Supplement: Supplementary file 1 [file proteomes-10-00007-s001.zip › Table S4_all identified proteins of secretome dataset_Kleinwort et al.xlsx]

## Sheet: table 1
									Normalized abundance
Accession	Peptide count	Unique peptides	Confidence score	Mass	Ratio control PWM/ unstim	Ratio BNP PWM/ unstim	Gene symbol	Description	control unstimulated	control PWM	BNP unstimulated	BNP PWM
ENSBTAP00000010168	1	1	58.34	31875	0	1.76172	MEMO1	MEMO1|EntrezGene|protein MEMO1 [Source:RefSeq peptide;Acc:NP_001069863]|11|ENSBTAG00000007734|ENSBTAT00000010168	0	0	58181.7	102500
ENSBTAP00000017224	1	1	13.05	36963	infinity	infinity	E1BFP5	||Uncharacterized protein [Source:UniProtKB/TrEMBL;Acc:E1BFP5]|23|ENSBTAG00000047014|ENSBTAT00000017224	0	76006.5	0	191.648
ENSBTAP00000018888	1	1	23.82	12601	infinity	2.66536	RPL35A	RPL35A|UniProtKB Gene Name|Bos taurus ribosomal protein L35a (RPL35A), mRNA. [Source:RefSeq mRNA;Acc:NM_001025321]|1|ENSBTAG00000014208|ENSBTAT00000018888	0	8559.35	2869.14	7647.28
ENSBTAP00000018757	1	1	57.41	11178	540.346	0.565022	CCL8	CCL8|UniProtKB Gene Name|Bos taurus chemokine (C-C motif) ligand 8 (CCL8), mRNA. [Source:RefSeq mRNA;Acc:NM_174007]|19|ENSBTAG00000014113|ENSBTAT00000018757	589.09	318312	45163.7	25518.5
ENSBTAP00000021212	1	1	37.19	14927	208.475	140.448	IL13	IL13|UniProtKB Gene Name|Bos taurus interleukin 13 (IL13), mRNA. [Source:RefSeq mRNA;Acc:NM_174089]|7|ENSBTAG00000015953|ENSBTAT00000021212	91.1655	19005.7	63.7533	8954
ENSBTAP00000003326	1	1	13.75	80418	83.2817	0.80543	DLG4	DLG4|HGNC Symbol|discs, large homolog 4 (Drosophila) [Source:HGNC Symbol;Acc:2903]|19|ENSBTAG00000002564|ENSBTAT00000003326	1246.83	103838	576.189	464.08
ENSBTAP00000048179	2	1	67.66	7391	51.7973	5.15277	H2B	H2B|UniProtKB Gene Name|Bos taurus histone H2B (H2B), mRNA. [Source:RefSeq mRNA;Acc:NM_001105643]|23|ENSBTAG00000031769|ENSBTAT00000053239	1803.67	93425.1	1073.16	5529.74
ENSBTAP00000035305	1	1	19.99	10477	37.1485	3.61474	CCL3	CCL3|EntrezGene|Bos taurus chemokine (C-C motif) ligand 3 (CCL3), mRNA. [Source:RefSeq mRNA;Acc:NM_174511]|19|ENSBTAG00000025250|ENSBTAT00000035430	6144.64	228264	25842.6	93414.3
ENSBTAP00000009463	3	3	106.65	10337	36.398	1.96005	CCL5	CCL5|UniProtKB Gene Name|Bos taurus chemokine (C-C motif) ligand 5 (CCL5), mRNA. [Source:RefSeq mRNA;Acc:NM_175827]|19|ENSBTAG00000007191|ENSBTAT00000009463	20379.8	741786	230518	451826
ENSBTAP00000021451	3	1	101.12	39047	30.6924	0.461212	BOLA-NC	BOLA-NC|UniProtKB Gene Name|Bos taurus non-classical MHC class I antigen (BOLA-NC1), mRNA. [Source:RefSeq mRNA;Acc:NM_001105616]|23|ENSBTAG00000019386|ENSBTAT00000021451	22834.2	700838	170944	78841.4
ENSBTAP00000003783	4	4	246.74	48346	27.398	11.3478	INHBA	INHBA|UniProtKB Gene Name|Bos taurus inhibin, beta A (INHBA), mRNA. [Source:RefSeq mRNA;Acc:NM_174363]|4|ENSBTAG00000002912|ENSBTAT00000003783	19283.7	528334	36038.9	408960
ENSBTAP00000027819	2	2	78.08	18016	17.3202	30.4842	IL2	IL2|UniProtKB Gene Name|Bos taurus interleukin 2 (IL2), mRNA. [Source:RefSeq mRNA;Acc:NM_180997]|17|ENSBTAG00000020883|ENSBTAT00000027819	4038.79	69952.5	7188.34	219131
ENSBTAP00000032626	8	2	354.95	68316	16.5405	2.97675	LOC511531	||Uncharacterized protein [Source:UniProtKB/TrEMBL;Acc:E1B7Z4]|3|ENSBTAG00000001143|ENSBTAT00000032697	3900.52	64516.4	3515.36	10464.4
ENSBTAP00000027449	4	4	250.6	45616	15.0748	5.24416	IDO1	IDO1|HGNC Symbol|indoleamine 2,3-dioxygenase 1 [Source:HGNC Symbol;Acc:6059]|27|ENSBTAG00000020602|ENSBTAT00000027449	30159.1	454643	55403.8	290546
ENSBTAP00000029273	2	2	41.26	28754	14.3581	14.9721	GZMA	GZMA|EntrezGene|Bos taurus granzyme A (granzyme 1, cytotoxic T-lymphocyte-associated serine esterase 3) (GZMA), mRNA. [Source:RefSeq mRNA;Acc:NM_001099095]|20|ENSBTAG00000021958|ENSBTAT00000029273	6496.46	93276.8	12654.8	189469
ENSBTAP00000019573	1	1	60.71	17470	13.984	12.418	ISG15	ISG15|UniProtKB Gene Name|Bos taurus ISG15 ubiquitin-like modifier (ISG15), mRNA. [Source:RefSeq mRNA;Acc:NM_174366]|16|ENSBTAG00000014707|ENSBTAT00000019573	7960.56	111320	11608	144148
ENSBTAP00000021569	6	6	126.72	78275	13.8625	2.32818	TGM2	TGM2|UniProtKB Gene Name|Bos taurus transglutaminase 2 (C polypeptide, protein-glutamine-gamma-glutamyltransferase) (TGM2), mRNA. [Source:RefSeq mRNA;Acc:NM_177507]|13|ENSBTAG00000016208|ENSBTAT00000021569	32368.5	448707	30101.9	70082.5
ENSBTAP00000044328	1	1	48.82	37482	11.7246	0.391573	E1BFB1	||Uncharacterized protein [Source:UniProtKB/TrEMBL;Acc:E1BFB1]|21|ENSBTAG00000017054|ENSBTAT00000022678	2542.72	29812.3	61166.4	23951.1
ENSBTAP00000009062;ENSBTAP00000023515	4	4	106.87	132608	10.8485	4.57876	INOS	INOS|UniProtKB Gene Name|Bos taurus nitric oxide synthase 2, inducible (NOS2), mRNA. [Source:RefSeq mRNA;Acc:NM_001076799]|19|ENSBTAG00000006894|ENSBTAT00000009062	27657.7	300045	23923.1	109538
ENSBTAP00000025846	3	1	147.59	76492	10.5855	0.674262	LOC781004	||Uncharacterized protein [Source:UniProtKB/TrEMBL;Acc:G3X7F3]|16|ENSBTAG00000024647|ENSBTAT00000025846	95.7539	1013.61	69008	46529.5
ENSBTAP00000012807;ENSBTAP00000023926	2	1	76.41	45782	10.2641	5.9887	HKA1	HKA1|UniProtKB Gene Name|Bos taurus keratin 34 (KRT34), mRNA. [Source:RefSeq mRNA;Acc:NM_001075951]|19|ENSBTAG00000037560|ENSBTAT00000012807	9179.54	94219.6	2691.91	16121
ENSBTAP00000013608	2	2	64.35	59160	8.9218	7.74786	ICAM1	ICAM1|EntrezGene|Bos taurus intercellular adhesion molecule 1 (ICAM1), mRNA. [Source:RefSeq mRNA;Acc:NM_174348]|7|ENSBTAG00000010303|ENSBTAT00000013608	15227.8	135860	4824.36	37378.5
ENSBTAP00000021014	4	4	193.12	53598	7.37739	0.804657	MMP1	MMP1|EntrezGene|Interstitial collagenase [Source:UniProtKB/TrEMBL;Acc:F1MT97]|15|ENSBTAG00000048029|ENSBTAT00000021014	132733	979226	379576	305428
ENSBTAP00000039324	1	1	39.8	11704	7.26158	8.34399	CXCL10	CXCL10|UniProtKB Gene Name|Bos taurus chemokine (C-X-C motif) ligand 10 (CXCL10), mRNA. [Source:RefSeq mRNA;Acc:NM_001046551]|6|ENSBTAG00000001725|ENSBTAT00000039533	2802.89	20353.4	10316.7	86082.5
ENSBTAP00000002786	3	3	105.44	17573	7.08535	1.37204	IL17	IL17|UniProtKB Gene Name|Bos taurus interleukin 17A (IL17A), mRNA. [Source:RefSeq mRNA;Acc:NM_001008412]|23|ENSBTAG00000002150|ENSBTAT00000002786	52541.3	372274	75938.5	104191
ENSBTAP00000013124	6	6	210.73	77074	6.76357	0.412112	MMP3	MMP3|HGNC Symbol|matrix metallopeptidase 3 (stromelysin 1, progelatinase) [Source:HGNC Symbol;Acc:7173]|15|ENSBTAG00000037768|ENSBTAT00000013124	233114	1.57668e+06	4.39253e+06	1.81022e+06
ENSBTAP00000043065;ENSBTAP00000049033	2	1	51.96	16117	6.35352	0.956207	HBE1	||Bos taurus hemoglobin, epsilon 1 (HBE1), mRNA. [Source:RefSeq mRNA;Acc:NM_001110507]|15|ENSBTAG00000037815|ENSBTAT00000045696	133516	848297	258223	246914
ENSBTAP00000037804	1	1	14.41	64518	6.2612	2.36603	EIF3D	EIF3D|UniProtKB Gene Name|Bos taurus eukaryotic translation initiation factor 3, subunit D (EIF3D), mRNA. [Source:RefSeq mRNA;Acc:NM_001034484]|5|ENSBTAG00000001988|ENSBTAT00000037985	9613.13	60189.7	5530.69	13085.8
ENSBTAP00000026275	5	5	225.21	11569	6.2186	0.778195	IL-8	IL-8|UniProtKB Gene Name|Bos taurus interleukin 8 (IL8), mRNA. [Source:RefSeq mRNA;Acc:NM_173925]|6|ENSBTAG00000019716|ENSBTAT00000026275	2.54914e+06	1.58521e+07	1.04392e+07	8.12374e+06
ENSBTAP00000022366	4	2	205.75	11171	6.20374	1.33756	GRO1	GRO1|EntrezGene|Bos taurus chemokine (C-X-C motif) ligand 1 (melanoma growth stimulating activity, alpha) (GRO1), mRNA. [Source:RefSeq mRNA;Acc:NM_175700]|6|ENSBTAG00000037558|ENSBTAT00000022366	366069	2.271e+06	595548	796581
ENSBTAP00000018050	1	1	55.01	57004	6.13851	21.762	SLC1A5	SLC1A5|HGNC Symbol|solute carrier family 1 (neutral amino acid transporter), member 5 [Source:HGNC Symbol;Acc:10943]|18|ENSBTAG00000013577|ENSBTAT00000018050	3647.63	22391	974.144	21199.3
ENSBTAP00000052397;ENSBTAP00000050757	3	1	86.14	67247	5.5623	18.3703	F1N6A3	||Uncharacterized protein [Source:UniProtKB/TrEMBL;Acc:F1N6A3]|3|ENSBTAG00000037634|ENSBTAT00000056121	3850.32	21416.7	1204.79	22132.4
ENSBTAP00000016634	3	3	141.32	19438	4.97112	177.558	IFNG	IFNG|UniProtKB Gene Name|Bos taurus interferon, gamma (IFNG), mRNA. [Source:RefSeq mRNA;Acc:NM_174086]|5|ENSBTAG00000012529|ENSBTAT00000016634	79538.7	395396	47769.1	8.48179e+06
ENSBTAP00000039327	5	3	277.62	10615	4.7959	0.929935	CXCL2	||Bos taurus chemokine (C-X-C motif) ligand 2 (CXCL2), mRNA. [Source:RefSeq mRNA;Acc:NM_174299]|6|ENSBTAG00000027513|ENSBTAT00000039536	760187	3.64579e+06	1.65626e+06	1.54021e+06
ENSBTAP00000026750;ENSBTAP00000011364	5	5	273.84	17931	4.20323	1.76538	CATHL1	CATHL1|UniProtKB Gene Name|Cathelicidin-1 [Source:UniProtKB/Swiss-Prot;Acc:P22226]|22|ENSBTAG00000013356|ENSBTAT00000026750	423193	1.77878e+06	814980	1.43875e+06
ENSBTAP00000013623	1	1	64.7	37659	3.91369	1.15343	MAPK1	MAPK1|UniProtKB Gene Name|Mitogen-activated protein kinase 1 [Source:UniProtKB/Swiss-Prot;Acc:P46196]|17|ENSBTAG00000010312|ENSBTAT00000013623	11978.7	46881.1	23043	26578.3
ENSBTAP00000010311	6	6	337.27	33249	3.66991	4.1508	PPA1	PPA1|UniProtKB Gene Name|Bos taurus pyrophosphatase (inorganic) 1 (PPA1), mRNA. [Source:RefSeq mRNA;Acc:NM_001075118]|28|ENSBTAG00000007836|ENSBTAT00000010311	421476	1.54678e+06	265098	1.10037e+06
ENSBTAP00000013116	1	1	18.59	12539	3.59209	4.08321	E1BH62	||Uncharacterized protein [Source:UniProtKB/TrEMBL;Acc:E1BH62]|16|ENSBTAG00000009943|ENSBTAT00000013116	23956.8	86055.1	20543.6	83883.9
ENSBTAP00000006848	1	1	17.65	172008	3.46307	0.069388	BAZ1B	BAZ1B|EntrezGene|Bos taurus bromodomain adjacent to zinc finger domain, 1B (BAZ1B), mRNA. [Source:RefSeq mRNA;Acc:NM_001192183]|25|ENSBTAG00000005197|ENSBTAT00000006848	3816.56	13217	280166	19440.2
ENSBTAP00000006139	11	10	558.87	54177	3.37433	2.91648	WARS	WARS|UniProtKB Gene Name|Bos taurus tryptophanyl-tRNA synthetase (WARS), mRNA. [Source:RefSeq mRNA;Acc:NM_174218]|21|ENSBTAG00000004679|ENSBTAT00000006139	1.38675e+06	4.67936e+06	1.51881e+06	4.42959e+06
ENSBTAP00000022034;ENSBTAP00000018618	8	8	695.16	15175	3.27858	0.859225	HBA	HBA|UniProtKB Gene Name|Bos taurus hemoglobin, alpha 2 (HBA), mRNA. [Source:RefSeq mRNA;Acc:NM_001077422]|25|ENSBTAG00000026417|ENSBTAT00000022034	7.5106e+07	2.46241e+08	1.08074e+08	9.286e+07
ENSBTAP00000010196	1	1	19.95	22216	3.06235	59.6521	APOBEC3A	APOBEC3A|EntrezGene|Bos taurus apolipoprotein B mRNA editing enzyme, catalytic polypeptide-like 3A (APOBEC3A), mRNA. [Source:RefSeq mRNA;Acc:NM_001163936]|5|ENSBTAG00000037800|ENSBTAT00000010196	13704.7	41968.8	332.994	19863.8
ENSBTAP00000003414	3	3	124.31	21392	3.04502	1.55798	PGLYRP1	PGLYRP1|UniProtKB Gene Name|Bos taurus peptidoglycan recognition protein 1 (PGLYRP1), mRNA. [Source:RefSeq mRNA;Acc:NM_174573]|18|ENSBTAG00000002635|ENSBTAT00000003414	227523	692813	327869	510813
ENSBTAP00000001704	2	2	89.45	80002	2.97894	1.98249	LTF	LTF|UniProtKB Gene Name|Bos taurus lactotransferrin (LTF), mRNA. [Source:RefSeq mRNA;Acc:NM_180998]|22|ENSBTAG00000001292|ENSBTAT00000001704	24743.5	73709.4	49508	98149.3
ENSBTAP00000024692	1	1	61.72	30774	2.95675	1.12098	GAPDH	glyceraldehyde-3-phosphate dehydrogenase family||Uncharacterized protein [Source:UniProtKB/TrEMBL;Acc:E1BH84]|11|ENSBTAG00000018554|ENSBTAT00000024692	94126.9	278310	159117	178366
ENSBTAP00000007021	1	1	44.31	42941	2.81311	1.29692	EIF3M	EIF3M|EntrezGene|Bos taurus eukaryotic translation initiation factor 3, subunit M (EIF3M), mRNA. [Source:RefSeq mRNA;Acc:NM_001035312]|15|ENSBTAG00000005338|ENSBTAT00000007021	32065.7	90204.3	38849	50383.9
ENSBTAP00000018822	2	2	32.83	33909	2.79043	0.660661	ARMC10	ARMC10|HGNC Symbol|armadillo repeat containing 10 [Source:HGNC Symbol;Acc:21706]|4|ENSBTAG00000014161|ENSBTAT00000018822	3921.17	10941.7	12129.4	8013.43
ENSBTAP00000023581	6	6	174.95	27733	2.76066	0.777676	CA2	CA2|EntrezGene|Bos taurus carbonic anhydrase II (CA2), mRNA. [Source:RefSeq mRNA;Acc:NM_178572]|14|ENSBTAG00000017733|ENSBTAT00000023581	349561	965017	199377	155051
ENSBTAP00000011863	4	4	173.62	42550	2.73459	3.08075	PTX3	PTX3|EntrezGene|Bos taurus pentraxin 3, long (PTX3), mRNA. [Source:RefSeq mRNA;Acc:NM_001076259]|1|ENSBTAG00000009012|ENSBTAT00000011863	165027	451280	99819.9	307520
ENSBTAP00000015713	1	1	47.13	63048	2.73222	9.31284	HMGCS1	HMGCS1|HGNC Symbol|3-hydroxy-3-methylglutaryl-CoA synthase 1 (soluble) [Source:HGNC Symbol;Acc:5007]|20|ENSBTAG00000011839|ENSBTAT00000015713	13938.6	38083.3	3987.18	37132
ENSBTAP00000043063;ENSBTAP00000050256;ENSBTAP00000054812;ENSBTAP00000055887	18	16	1221.74	16001	2.73055	0.787561	HBB	HBB|UniProtKB Gene Name|Bos taurus hemoglobin, beta (HBB), mRNA. [Source:RefSeq mRNA;Acc:NM_173917]|15|ENSBTAG00000038748|ENSBTAT00000045694	1.24524e+08	3.4002e+08	2.03898e+08	1.60582e+08
ENSBTAP00000002081	5	5	195.3	95867	2.722	0.818017	BKB3	BKB3|UniProtKB Gene Name|Bos taurus solute carrier family 4, anion exchanger, member 1 (erythrocyte membrane protein band 3, Diego blood group) (SLC4A1), mRNA. [Source:RefSeq mRNA;Acc:NM_181036]|19|ENSBTAG00000001610|ENSBTAT00000002081	186607	507945	267330	218680
ENSBTAP00000042250;ENSBTAP00000003930;ENSBTAP00000017763	2	2	49.64	18069	2.6428	1.73077	CATHL6	CATHL6|UniProtKB Gene Name|Bos taurus cathelicidin 6 (CATHL6), mRNA. [Source:RefSeq mRNA;Acc:NM_174832]|22|ENSBTAG00000020077|ENSBTAT00000044788	51002.6	134789	62021	107344
ENSBTAP00000011088	2	2	91.63	34537	2.61687	1.93587	UPP1	UPP1|HGNC Symbol|uridine phosphorylase 1 [Source:HGNC Symbol;Acc:12576]|4|ENSBTAG00000008428|ENSBTAT00000011088	53184.6	139177	14938.9	28919.7
ENSBTAP00000042524	9	9	654.42	34846	2.61041	3.77008	SDS	SDS|HGNC Symbol|serine dehydratase [Source:HGNC Symbol;Acc:10691]|17|ENSBTAG00000031814|ENSBTAT00000045109	2.8874e+06	7.53731e+06	390955	1.47393e+06
ENSBTAP00000003094	1	1	59.08	51016	2.58236	0.866884	TGFB1I1	TGFB1I1|UniProtKB Gene Name|Bos taurus transforming growth factor beta 1 induced transcript 1 (TGFB1I1), mRNA. [Source:RefSeq mRNA;Acc:NM_001035313]|25|ENSBTAG00000002391|ENSBTAT00000003094	7170.6	18517	16882.3	14635
ENSBTAP00000020677	1	1	17.13	62801	2.51057	0	PLBD1	PLBD1|UniProtKB Gene Name|Bos taurus phospholipase B domain containing 1 (PLBD1), transcript variant a, mRNA. [Source:RefSeq mRNA;Acc:NM_001166298]|5|ENSBTAG00000015562|ENSBTAT00000020677	33584.7	84316.7	1332.16	0
ENSBTAP00000002972	2	2	77.04	138424	2.49731	1.13127	GLG1	GLG1|HGNC Symbol|golgi glycoprotein 1 [Source:HGNC Symbol;Acc:4316]|18|ENSBTAG00000002303|ENSBTAT00000002972	38386	95861.7	86856.3	98258.1
ENSBTAP00000022393	3	3	146.71	19575	2.48448	0.779537	IL17F	IL17F|HGNC Symbol|interleukin 17F [Source:HGNC Symbol;Acc:16404]|23|ENSBTAG00000016835|ENSBTAT00000022393	272103	676035	493879	384997
ENSBTAP00000038081	4	4	173.49	16921	2.4536	1.15526	LYZ	LYZ|UniProtKB Gene Name|Bos taurus lysozyme (LYZ), mRNA. [Source:RefSeq mRNA;Acc:NM_001078159]|5|ENSBTAG00000026779|ENSBTAT00000038266	1.15258e+06	2.82798e+06	895081	1.03405e+06
ENSBTAP00000013466	1	1	28.12	58985	2.45115	13.5462	UAP1	UAP1|UniProtKB Gene Name|Bos taurus UDP-N-acteylglucosamine pyrophosphorylase 1 (UAP1), mRNA. [Source:RefSeq mRNA;Acc:NM_001046404]|3|ENSBTAG00000010206|ENSBTAT00000013466	17758.8	43529.6	1730.72	23444.7
ENSBTAP00000037982	1	1	36.74	250261	2.31836	6.80337	DOCK10	DOCK10|HGNC Symbol|dedicator of cytokinesis 10 [Source:HGNC Symbol;Acc:23479]|2|ENSBTAG00000000581|ENSBTAT00000038166	10122	23466.4	3319.73	22585.4
ENSBTAP00000034709	1	1	32.46	123761	2.31781	2.60337	FMNL1	FMNL1|HGNC Symbol|formin-like 1 [Source:HGNC Symbol;Acc:1212]|19|ENSBTAG00000004196|ENSBTAT00000034825	6472.36	15001.7	1736.51	4520.78
ENSBTAP00000011787	1	1	21.17	81888	2.26699	0.750583	TAP1	TAP1|UniProtKB Gene Name|Bos taurus transporter 1, ATP-binding cassette, sub-family B (MDR/TAP) (TAP1), mRNA. [Source:RefSeq mRNA;Acc:NM_001098058]|23|ENSBTAG00000008953|ENSBTAT00000011787	13394.5	30365.2	30601.5	22969
ENSBTAP00000020401	1	1	62.19	83922	2.13721	infinity	NASP	NASP|UniProtKB Gene Name|Bos taurus nuclear autoantigenic sperm protein (histone-binding) (NASP), mRNA. [Source:RefSeq mRNA;Acc:NM_001038088]|3|ENSBTAG00000015346|ENSBTAT00000020401	13427.2	28696.8	0	1884.95
ENSBTAP00000025254	1	1	14.56	83806	2.13236	1.47739	GARS	GARS|UniProtKB Gene Name|Bos taurus glycyl-tRNA synthetase (GARS), mRNA. [Source:RefSeq mRNA;Acc:NM_001097566]|4|ENSBTAG00000018972|ENSBTAT00000025254	23584	50289.6	36566.9	54023.6
ENSBTAP00000026209	2	2	104.69	20312	2.12083	0.544033	IL1RN	IL1RN|UniProtKB Gene Name|Bos taurus interleukin 1 receptor antagonist (IL1RN), mRNA. [Source:RefSeq mRNA;Acc:NM_174357]|11|ENSBTAG00000019665|ENSBTAT00000026209	264521	561003	412136	224215
ENSBTAP00000011834	1	1	30.04	40802	2.05796	3.50406	DRG1	DRG1|UniProtKB Gene Name|Bos taurus developmentally regulated GTP binding protein 1 (DRG1), mRNA. [Source:RefSeq mRNA;Acc:NM_001034691]|17|ENSBTAG00000008990|ENSBTAT00000011834	5975.59	12297.5	3016.68	10570.6
ENSBTAP00000008749	1	1	15.51	23696	2.0254	0.890125	RALA	RALA|UniProtKB Gene Name|Bos taurus v-ral simian leukemia viral oncogene homolog A (ras related) (RALA), mRNA. [Source:RefSeq mRNA;Acc:NM_001034644]|4|ENSBTAG00000006661|ENSBTAT00000008749	13093.6	26519.7	34495.7	30705.5
ENSBTAP00000045456	1	1	32.71	61622	2.02234	1.89608	HEXB	||Bos taurus hexosaminidase B (beta polypeptide) (HEXB), mRNA. [Source:RefSeq mRNA;Acc:NM_001076510]|20|ENSBTAG00000015512|ENSBTAT00000048411	28737.8	58117.7	16092.9	30513.4
ENSBTAP00000023221	5	5	163.46	49329	2.00316	2.37293	NUCB2	NUCB2|UniProtKB Gene Name|Bos taurus nucleobindin 2 (NUCB2), mRNA. [Source:RefSeq mRNA;Acc:NM_001075381]|15|ENSBTAG00000017468|ENSBTAT00000023221	239976	480710	286887	680762
ENSBTAP00000032150	2	2	52.64	179452	2.00286	1.40359	EIF4G1	EIF4G1|HGNC Symbol|eukaryotic translation initiation factor 4 gamma, 1 [Source:HGNC Symbol;Acc:3296]|1|ENSBTAG00000012881|ENSBTAT00000032213	99144	198572	85580.4	120120
ENSBTAP00000019699	3	1	94.24	46574	1.99543	1.37532	HNRPDL	HNRPDL|UniProtKB Gene Name|Bos taurus heterogeneous nuclear ribonucleoprotein D-like (HNRPDL), mRNA. [Source:RefSeq mRNA;Acc:NM_001083725]|6|ENSBTAG00000014804|ENSBTAT00000019699	71249.3	142173	59135.1	81329.9
ENSBTAP00000018806	2	2	95.89	23083	1.96417	1.69085	LCN2	LCN2|HGNC Symbol|lipocalin 2 [Source:HGNC Symbol;Acc:6526]|11|ENSBTAG00000014149|ENSBTAT00000018806	84324.2	165627	210880	356565
ENSBTAP00000018840	1	1	28.15	38746	1.95588	2.63032	STRAP	STRAP|UniProtKB Gene Name|Bos taurus serine/threonine kinase receptor associated protein (STRAP), mRNA. [Source:RefSeq mRNA;Acc:NM_001015567]|5|ENSBTAG00000014175|ENSBTAT00000018840	25559.6	49991.5	21029.8	55315
ENSBTAP00000003953	1	1	26.16	79780	1.95365	0.846226	TAP2	TAP2|UniProtKB Gene Name|Bos taurus transporter 2, ATP-binding cassette, sub-family B (MDR/TAP) (TAP2), mRNA. [Source:RefSeq mRNA;Acc:NM_174222]|23|ENSBTAG00000003038|ENSBTAT00000003953	7195.61	14057.7	8831.26	7473.24
ENSBTAP00000011484	4	4	166.61	46676	1.95106	1.84689	SSB	SSB|UniProtKB Gene Name|Bos taurus Sjogren syndrome antigen B (autoantigen La) (SSB), mRNA. [Source:RefSeq mRNA;Acc:NM_176665]|2|ENSBTAG00000008716|ENSBTAT00000011484	141189	275469	87853.2	162255
ENSBTAP00000003073	7	7	251.35	54949	1.94615	2.87919	NUCB1	NUCB1|UniProtKB Gene Name|Bos taurus nucleobindin 1 (NUCB1), mRNA. [Source:RefSeq mRNA;Acc:NM_001075199]|18|ENSBTAG00000002378|ENSBTAT00000003073	405314	788800	305172	878648
ENSBTAP00000040249	1	1	49.14	69023	1.93998	0.984247	NPLOC4	NPLOC4|EntrezGene|Bos taurus nuclear protein localization 4 homolog (S. cerevisiae) (NPLOC4), mRNA. [Source:RefSeq mRNA;Acc:NM_001192189]|19|ENSBTAG00000019105|ENSBTAT00000042613	15667.8	30395.3	26463	26046.1
ENSBTAP00000015172	4	4	211.77	73981	1.93647	1.17641	HSPA9	HSPA9|UniProtKB Gene Name|Bos taurus heat shock 70kDa protein 9 (mortalin) (HSPA9), mRNA. [Source:RefSeq mRNA;Acc:NM_001034524]|7|ENSBTAG00000011419|ENSBTAT00000015172	141231	273489	198230	233199
ENSBTAP00000000486	1	1	47.84	81364	1.92899	2.07559	SSRP1	SSRP1|EntrezGene|Bos taurus structure specific recognition protein 1 (SSRP1), mRNA. [Source:RefSeq mRNA;Acc:NM_001101041]|15|ENSBTAG00000000375|ENSBTAT00000000486	16458.1	31747.6	12304.9	25539.8
ENSBTAP00000017122	1	1	18	45146	1.9206	0.741786	ACAT1	ACAT1|UniProtKB Gene Name|Bos taurus acetyl-CoA acetyltransferase 1 (ACAT1), mRNA. [Source:RefSeq mRNA;Acc:NM_001046075]|15|ENSBTAG00000012885|ENSBTAT00000017122	11679.1	22430.8	15921.7	11810.5
ENSBTAP00000054436	1	1	43.62	26858	1.91681	3.86927	MARCKSL1	MARCKSL1|EntrezGene|Bos taurus MARCKS-like 1 (MARCKSL1), mRNA. [Source:RefSeq mRNA;Acc:NM_001076172]|2|ENSBTAG00000046862|ENSBTAT00000066186	76113.3	145895	6786.09	26257.2
ENSBTAP00000020608	1	1	33.37	55666	1.90433	5.70316	NAMPT	NAMPT|EntrezGene|Bos taurus nicotinamide phosphoribosyltransferase (NAMPT), mRNA. [Source:RefSeq mRNA;Acc:NM_001244141]|4|ENSBTAG00000015509|ENSBTAT00000020608	22048.8	41988.2	6088.39	34723.1
ENSBTAP00000032241	1	1	29.02	337872	1.89355	1.62987	KALRN	KALRN|EntrezGene|kalirin [Source:RefSeq peptide;Acc:NP_001178293]|1|ENSBTAG00000002640|ENSBTAT00000032306	75827.2	143583	81292.8	132497
ENSBTAP00000018886	1	1	31.48	45408	1.87654	0.778242	PRKAR2A	PRKAR2A|UniProtKB Gene Name|Bos taurus protein kinase, cAMP-dependent, regulatory, type II, alpha (PRKAR2A), mRNA. [Source:RefSeq mRNA;Acc:NM_001191367]|22|ENSBTAG00000014205|ENSBTAT00000018886	130785	245424	112251	87358.2
ENSBTAP00000003467	1	1	68.73	38738	1.86592	2.21771	SAE1	SAE1|UniProtKB Gene Name|Bos taurus SUMO1 activating enzyme subunit 1 (SAE1), mRNA. [Source:RefSeq mRNA;Acc:NM_001081711]|18|ENSBTAG00000002676|ENSBTAT00000003467	48582.4	90650.8	29227.3	64817.7
ENSBTAP00000031126	7	3	388.93	41619	1.83471	1.42162	BOLA	BOLA|UniProtKB Gene Name|Bos taurus MHC class I heavy chain (BOLA), transcript variant 1, mRNA. [Source:RefSeq mRNA;Acc:NM_001038518]|23|ENSBTAG00000002069|ENSBTAT00000031167	870538	1.59719e+06	902599	1.28315e+06
ENSBTAP00000022774	2	2	134.13	37722	1.82485	1.45017	CTSS	CTSS|UniProtKB Gene Name|Bos taurus cathepsin S (CTSS), mRNA. [Source:RefSeq mRNA;Acc:NM_001033615]|3|ENSBTAG00000017135|ENSBTAT00000022774	504150	919997	335977	487225
ENSBTAP00000018414	1	1	15.2	9797	1.82241	2.33996	RPS27	RPS27|UniProtKB Gene Name|Bos taurus ribosomal protein S27 (RPS27), transcript variant 1, mRNA. [Source:RefSeq mRNA;Acc:NM_001098135]|3|ENSBTAG00000013866|ENSBTAT00000018414	56913.9	103721	17472.1	40884
ENSBTAP00000029271	2	2	57.5	16972	1.80869	1.59732	NPC2	NPC2|UniProtKB Gene Name|Bos taurus Niemann-Pick disease, type C2 (NPC2), mRNA. [Source:RefSeq mRNA;Acc:NM_173918]|10|ENSBTAG00000021955|ENSBTAT00000029271	164804	298079	124837	199404
ENSBTAP00000007922	1	1	14.7	116875	1.79957	0.656827	OGDH	OGDH|UniProtKB Gene Name|Bos taurus oxoglutarate (alpha-ketoglutarate) dehydrogenase (lipoamide) (OGDH), mRNA. [Source:RefSeq mRNA;Acc:NM_001076030]|4|ENSBTAG00000006029|ENSBTAT00000007922	12958.3	23319.4	36634.6	24062.6
ENSBTAP00000043518	1	1	51.16	54024	1.79504	0.829003	PPM1B	PPM1B|UniProtKB Gene Name|Bos taurus protein phosphatase, Mg2+/Mn2+ dependent, 1B (PPM1B), mRNA. [Source:RefSeq mRNA;Acc:NM_174430]|11|ENSBTAG00000000223|ENSBTAT00000046197	32975.2	59191.7	73455.8	60895.1
ENSBTAP00000020719	2	2	39.23	18886	1.78327	1.96389	RPS10	RPS10|UniProtKB Gene Name|Bos taurus ribosomal protein S10 (RPS10), mRNA. [Source:RefSeq mRNA;Acc:NM_001034716]|23|ENSBTAG00000015598|ENSBTAT00000020719	29365.8	52367.1	17114.3	33610.5
ENSBTAP00000018818	1	1	34.89	95733	1.77942	2.20728	ILF3	ILF3|HGNC Symbol|interleukin enhancer binding factor 3, 90kDa [Source:HGNC Symbol;Acc:6038]|7|ENSBTAG00000040076|ENSBTAT00000018818	44674	79494	23136.1	51067.7
ENSBTAP00000013402;ENSBTAP00000049611	4	4	216.17	19683	1.77577	1.4905	TPT1	TPT1|UniProtKB Gene Name|Bos taurus tumor protein, translationally-controlled 1 (TPT1), mRNA. [Source:RefSeq mRNA;Acc:NM_001014388]|12|ENSBTAG00000010156|ENSBTAT00000013402	1.01665e+06	1.80534e+06	893449	1.33168e+06
ENSBTAP00000008734;ENSBTAP00000001787	2	2	61.5	41149	1.75765	2.70845	HRMT1L2	HRMT1L2|UniProtKB Gene Name|Bos taurus protein arginine methyltransferase 1 (PRMT1), mRNA. [Source:RefSeq mRNA;Acc:NM_001015624]|18|ENSBTAG00000006646|ENSBTAT00000008734	64031.5	112545	32685.2	88526.2
ENSBTAP00000004188	2	2	44.43	46280	1.73798	3.37627	RPL3	RPL3|UniProtKB Gene Name|Bos taurus ribosomal protein L3 (RPL3), mRNA. [Source:RefSeq mRNA;Acc:NM_174715]|5|ENSBTAG00000003228|ENSBTAT00000004188	64681.2	112414	34888.7	117794
ENSBTAP00000017002	1	1	29.33	28488	1.73182	0.881621	DCUN1D1	DCUN1D1|HGNC Symbol|DCN1, defective in cullin neddylation 1, domain containing 1 [Source:HGNC Symbol;Acc:18184]|1|ENSBTAG00000012797|ENSBTAT00000017002	30572.1	52945.6	52696.8	46458.6
ENSBTAP00000020318	1	1	23.47	16931	1.726	1.28638	ARPC5L	ARPC5L|UniProtKB Gene Name|Bos taurus actin related protein 2/3 complex, subunit 5-like (ARPC5L), mRNA. [Source:RefSeq mRNA;Acc:NM_001034737]|11|ENSBTAG00000015278|ENSBTAT00000020318	44023.5	75984.7	30919.4	39774.1
ENSBTAP00000002894	3	2	242.77	11002	1.72083	1.78187	E1BN49	||Uncharacterized protein [Source:UniProtKB/TrEMBL;Acc:E1BN49]|4|ENSBTAG00000039928|ENSBTAT00000002894	440900	758715	285924	509480
ENSBTAP00000024376;ENSBTAP00000047550	4	2	128.82	11621	1.71758	1.64396	RPLP1	RPLP1|UniProtKB Gene Name|Bos taurus ribosomal protein, large, P1 (RPLP1), mRNA. [Source:RefSeq mRNA;Acc:NM_001025340]|10|ENSBTAG00000018320|ENSBTAT00000024376	151815	260756	75024.2	123336
ENSBTAP00000041259	1	1	22.81	16874	1.71547	0.956892	GMFB	GMFB|UniProtKB Gene Name|Bos taurus glia maturation factor, beta (GMFB), mRNA. [Source:RefSeq mRNA;Acc:NM_001101237]|10|ENSBTAG00000025311|ENSBTAT00000043708	151642	260137	181706	173873
ENSBTAP00000004190	1	1	36.95	14970	1.70216	1.83714	RPL23	RPL23|UniProtKB Gene Name|Bos taurus ribosomal protein L23 (RPL23), mRNA. [Source:RefSeq mRNA;Acc:NM_001035014]|19|ENSBTAG00000003229|ENSBTAT00000004190	57194.3	97353.6	42016.8	77190.6
ENSBTAP00000021327	1	1	16.06	47096	1.69552	2.06953	EIF4A3	EIF4A3|UniProtKB Gene Name|Bos taurus eukaryotic translation initiation factor 4A3 (EIF4A3), mRNA. [Source:RefSeq mRNA;Acc:NM_001046188]|19|ENSBTAG00000016023|ENSBTAT00000021327	8822.21	14958.2	4900.54	10141.8
ENSBTAP00000039739	1	1	23.63	120765	1.68987	1.40842	IPO7	IPO7|EntrezGene|Bos taurus importin 7 (IPO7), mRNA. [Source:RefSeq mRNA;Acc:NM_001192356]|15|ENSBTAG00000027722|ENSBTAT00000039955	27786.3	46955.1	38135.2	53710.5
ENSBTAP00000012391	2	2	157.13	47354	1.68097	1.37035	PSMC4	PSMC4|UniProtKB Gene Name|Bos taurus proteasome (prosome, macropain) 26S subunit, ATPase, 4 (PSMC4), mRNA. [Source:RefSeq mRNA;Acc:NM_001035083]|18|ENSBTAG00000009414|ENSBTAT00000012391	52621.8	88455.7	133791	183339
ENSBTAP00000007163	1	1	34	178321	1.67342	1.13374	UGGT1	UGGT1|HGNC Symbol|UDP-glucose glycoprotein glucosyltransferase 1 [Source:HGNC Symbol;Acc:15663]|2|ENSBTAG00000005444|ENSBTAT00000007163	14473.5	24220.3	25847	29303.7
ENSBTAP00000009160	1	1	26.41	44943	1.66411	1.15157	OLA1	OLA1|UniProtKB Gene Name|Bos taurus Obg-like ATPase 1 (OLA1), mRNA. [Source:RefSeq mRNA;Acc:NM_001046045]|2|ENSBTAG00000006970|ENSBTAT00000009160	17801.9	29624.4	17945.9	20666
ENSBTAP00000044368	1	1	38.57	56873	1.66318	1.02124	OXCT1	OXCT1|UniProtKB Gene Name|Bos taurus 3-oxoacid CoA transferase 1 (OXCT1), mRNA. [Source:RefSeq mRNA;Acc:NM_001076070]|20|ENSBTAG00000033186|ENSBTAT00000047142	42126.6	70064	71335	72850
ENSBTAP00000042131	2	2	47.67	145958	1.65425	1.37076	PFAS	PFAS|UniProtKB Gene Name|Bos taurus phosphoribosylformylglycinamidine synthase (PFAS), mRNA. [Source:RefSeq mRNA;Acc:NM_001256564]|19|ENSBTAG00000031509|ENSBTAT00000044654	36274.2	60006.4	32619.5	44713.4
ENSBTAP00000003664	1	1	14.33	53795	1.653	1.43342	U2AF2	U2AF2|UniProtKB Gene Name|Bos taurus U2 small nuclear RNA auxiliary factor 2 (U2AF2), mRNA. [Source:RefSeq mRNA;Acc:NM_001075336]|18|ENSBTAG00000002830|ENSBTAT00000003664	6086.22	10060.5	7488.08	10733.6
ENSBTAP00000004418	1	1	30.25	14690	1.65069	2.49522	SF3B14	SF3B14|UniProtKB Gene Name|Bos taurus splicing factor 3B, 14 kDa subunit (SF3B14), mRNA. [Source:RefSeq mRNA;Acc:NM_001046017]|11|ENSBTAG00000003407|ENSBTAT00000004418	27175.6	44858.5	11894.2	29678.7
ENSBTAP00000056644;ENSBTAP00000022412;ENSBTAP00000054753	3	3	121.82	70854	1.64565	1.74078	PABPC1	PABPC1|UniProtKB Gene Name|Bos taurus poly(A) binding protein, cytoplasmic 1 (PABPC1), mRNA. [Source:RefSeq mRNA;Acc:NM_174568]|14|ENSBTAG00000046358|ENSBTAT00000064237	118637	195234	66883.7	116430
ENSBTAP00000043412	1	1	42.93	72703	1.64427	1.23595	SCFD1	SCFD1|EntrezGene|Bos taurus sec1 family domain containing 1 (SCFD1), mRNA. [Source:RefSeq mRNA;Acc:NM_001191365]|21|ENSBTAG00000017565|ENSBTAT00000046085	24510	40301.1	22948.1	28362.7
ENSBTAP00000007860	16	16	605.62	56653	1.64334	1.86541	LAP3	LAP3|UniProtKB Gene Name|Bos taurus leucine aminopeptidase 3 (LAP3), mRNA. [Source:RefSeq mRNA;Acc:NM_174098]|6|ENSBTAG00000005989|ENSBTAT00000007860	2.00306e+06	3.29171e+06	1.44177e+06	2.68949e+06
ENSBTAP00000008907	8	8	392.69	57227	1.64056	1.38117	PHGDH	PHGDH|UniProtKB Gene Name|Bos taurus phosphoglycerate dehydrogenase (PHGDH), mRNA. [Source:RefSeq mRNA;Acc:NM_001035017]|3|ENSBTAG00000039719|ENSBTAT00000008907	1.0408e+06	1.70749e+06	867478	1.19813e+06
ENSBTAP00000002616;ENSBTAP00000013947	8	8	388.64	17049	1.63948	1.17563	EIF5A	EIF5A|UniProtKB Gene Name|Bos taurus eukaryotic translation initiation factor 5A (EIF5A), mRNA. [Source:RefSeq mRNA;Acc:NM_001003658]|19|ENSBTAG00000002018|ENSBTAT00000002616	922084	1.51174e+06	1.02807e+06	1.20863e+06
ENSBTAP00000022237	3	3	189.51	30241	1.63675	1.53817	ANP32E	ANP32E|EntrezGene|Bos taurus acidic (leucine-rich) nuclear phosphoprotein 32 family, member E (ANP32E), mRNA. [Source:RefSeq mRNA;Acc:NM_001075306]|3|ENSBTAG00000016730|ENSBTAT00000022237	194967	319111	178362	274351
ENSBTAP00000044296	1	1	44.11	50524	1.63006	1.48701	ADSS	ADSS|UniProtKB Gene Name|Bos taurus adenylosuccinate synthase (ADSS), mRNA. [Source:RefSeq mRNA;Acc:NM_001167809]|16|ENSBTAG00000013885|ENSBTAT00000047061	39844.8	64949.4	27965	41584.2
ENSBTAP00000017392	2	2	54.67	25063	1.62982	1.46075	PSPH	PSPH|UniProtKB Gene Name|Bos taurus phosphoserine phosphatase (PSPH), mRNA. [Source:RefSeq mRNA;Acc:NM_001046355]|25|ENSBTAG00000013081|ENSBTAT00000017392	84142.3	137137	85992.9	125614
ENSBTAP00000004984	4	4	258.42	23263	1.62784	0.997054	PSMB3	PSMB3|UniProtKB Gene Name|Bos taurus proteasome (prosome, macropain) subunit, beta type, 3 (PSMB3), mRNA. [Source:RefSeq mRNA;Acc:NM_001034596]|19|ENSBTAG00000003830|ENSBTAT00000004984	286822	466901	349378	348348
ENSBTAP00000017106	1	1	18.77	44897	1.60534	1.38747	SNX6	SNX6|UniProtKB Gene Name|Bos taurus sorting nexin 6 (SNX6), mRNA. [Source:RefSeq mRNA;Acc:NM_001046331]|21|ENSBTAG00000012873|ENSBTAT00000017106	12035.9	19321.7	10711.2	14861.4
ENSBTAP00000018540	5	3	194.12	38595	1.59626	1.44427	HNRPD	HNRPD|UniProtKB Gene Name|Bos taurus heterogeneous nuclear ribonucleoprotein D (AU-rich element RNA binding protein 1, 37kDa) (HNRNPD), mRNA. [Source:RefSeq mRNA;Acc:NM_001098064]|6|ENSBTAG00000013952|ENSBTAT00000018540	735587	1.17419e+06	405108	585086
ENSBTAP00000007438	1	1	46.09	23497	1.59576	0.596223	SNAP23	SNAP23|UniProtKB Gene Name|Bos taurus synaptosomal-associated protein, 23kDa (SNAP23), mRNA. [Source:RefSeq mRNA;Acc:NM_001075831]|10|ENSBTAG00000005661|ENSBTAT00000007438	53183.1	84867.4	65119.2	38825.6
ENSBTAP00000012704	2	2	34.05	101740	1.58864	1.22189	MTHFD1	MTHFD1|UniProtKB Gene Name|Bos taurus methylenetetrahydrofolate dehydrogenase (NADP+ dependent) 1, methenyltetrahydrofolate cyclohydrolase, formyltetrahydrofolate synthetase (MTHFD1), mRNA. [Source:RefSeq mRNA;Acc:NM_001083477]|10|ENSBTAG00000009641	58583.5	93067.8	48952	59813.9
ENSBTAP00000027662	3	1	150.28	37177	1.58476	1.11303	PCBP2	PCBP2|UniProtKB Gene Name|Bos taurus poly(rC) binding protein 2 (PCBP2), mRNA. [Source:RefSeq mRNA;Acc:NM_001034711]|5|ENSBTAG00000020757|ENSBTAT00000027662	27843.3	44125.1	20574.8	22900.5
ENSBTAP00000023384	1	1	49.22	105984	1.57829	2.68287	EIF3C	EIF3C|UniProtKB Gene Name|Bos taurus eukaryotic translation initiation factor 3, subunit C-like (EIF3CL), mRNA. [Source:RefSeq mRNA;Acc:NM_001034618]|25|ENSBTAG00000006543|ENSBTAT00000023384	16468.8	25992.6	4333.32	11625.7
ENSBTAP00000030260	1	1	21.2	49397	1.57387	1.26616	EIF5	EIF5|UniProtKB Gene Name|Bos taurus eukaryotic translation initiation factor 5 (EIF5), mRNA. [Source:RefSeq mRNA;Acc:NM_001193223]|21|ENSBTAG00000016282|ENSBTAT00000030275	80397.7	126535	50235.9	63606.8
ENSBTAP00000004656	1	1	16.62	66715	1.57129	1.69235	GSPT1	GSPT1|UniProtKB Gene Name|Bos taurus G1 to S phase transition 1 (GSPT1), mRNA. [Source:RefSeq mRNA;Acc:NM_001098071]|25|ENSBTAG00000003577|ENSBTAT00000004656	39892.6	62682.8	41674.3	70527.6
ENSBTAP00000001034	26	4	1404.64	83105	1.56785	1.779	HSP90	||Heat shock protein HSP 90-beta [Source:UniProtKB/TrEMBL;Acc:G5E507]|23|ENSBTAG00000000778|ENSBTAT00000001034	1.90675e+06	2.98949e+06	1.37329e+06	2.44308e+06
ENSBTAP00000022364	1	1	45.33	32642	1.5651	1.02833	PYCRL	PYCRL|UniProtKB Gene Name|Bos taurus pyrroline-5-carboxylate reductase-like (PYCRL), mRNA. [Source:RefSeq mRNA;Acc:NM_001014906]|14|ENSBTAG00000016810|ENSBTAT00000022364	36723.8	57476.5	54830.7	56384.2
ENSBTAP00000027339	7	7	289.28	20194	1.55648	1.02801	PARK7	PARK7|UniProtKB Gene Name|Bos taurus parkinson protein 7 (PARK7), mRNA. [Source:RefSeq mRNA;Acc:NM_001015572]|16|ENSBTAG00000020518|ENSBTAT00000027339	1.73644e+06	2.70273e+06	2.21501e+06	2.27705e+06
ENSBTAP00000003333	1	1	70.77	71614	1.55069	1.2797	UBA2	UBA2|UniProtKB Gene Name|Bos taurus ubiquitin-like modifier activating enzyme 2 (UBA2), mRNA. [Source:RefSeq mRNA;Acc:NM_001083381]|18|ENSBTAG00000002573|ENSBTAT00000003333	36497.2	56595.8	29884.6	38243.4
ENSBTAP00000025311	1	1	54.92	15946	1.54995	1.81876	IFITM3	IFITM3|EntrezGene|Bos taurus interferon induced transmembrane protein 3 (IFITM3), mRNA. [Source:RefSeq mRNA;Acc:NM_001078141]|29|ENSBTAG00000019015|ENSBTAT00000025311	439555	681288	118011	214633
ENSBTAP00000003201	1	1	47.02	7893	1.54831	2.38783	RPS28	RPS28|UniProtKB Gene Name|Bos taurus ribosomal protein S28 (RPS28), mRNA. [Source:RefSeq mRNA;Acc:NM_001025316]|7|ENSBTAG00000002468|ENSBTAT00000003201	138858	214996	68627	163870
ENSBTAP00000005581	20	20	814.91	96276	1.54651	1.90194	EEF2	EEF2|UniProtKB Gene Name|Bos taurus eukaryotic translation elongation factor 2 (EEF2), mRNA. [Source:RefSeq mRNA;Acc:NM_001075121]|7|ENSBTAG00000004258|ENSBTAT00000005581	3.31024e+06	5.11933e+06	1.83217e+06	3.48468e+06
ENSBTAP00000026393	2	2	56.52	107329	1.54232	2.41908	AARS	AARS|UniProtKB Gene Name|Bos taurus alanyl-tRNA synthetase (AARS), mRNA. [Source:RefSeq mRNA;Acc:NM_001101075]|18|ENSBTAG00000019810|ENSBTAT00000026393	55561	85692.9	34460.8	83363.4
ENSBTAP00000020443	4	4	145.07	71319	1.54033	1.2247	ARHGAP18	ARHGAP18|EntrezGene|Bos taurus Rho GTPase activating protein 18 (ARHGAP18), mRNA. [Source:RefSeq mRNA;Acc:NM_001110772]|9|ENSBTAG00000015381|ENSBTAT00000020443	201403	310226	238515	292110
ENSBTAP00000022548	3	3	95.45	56648	1.53388	1.38842	PSMD5	PSMD5|UniProtKB Gene Name|Bos taurus proteasome (prosome, macropain) 26S subunit, non-ATPase, 5 (PSMD5), mRNA. [Source:RefSeq mRNA;Acc:NM_001075693]|8|ENSBTAG00000016952|ENSBTAT00000022548	160280	245850	150563	209044
ENSBTAP00000034658	8	7	446.28	37276	1.53334	1.90124	GIMAP4	GIMAP4|UniProtKB Gene Name|Bos taurus GTPase, IMAP family member 4 (GIMAP4), mRNA. [Source:RefSeq mRNA;Acc:NM_001046060]|4|ENSBTAG00000046257|ENSBTAT00000034773	1.75239e+06	2.68701e+06	910017	1.73016e+06
ENSBTAP00000036650	8	8	443.03	37664	1.52908	2.65433	CATB	CATB|UniProtKB Gene Name|Bos taurus cathepsin B (CTSB), mRNA. [Source:RefSeq mRNA;Acc:NM_174031]|8|ENSBTAG00000012442|ENSBTAT00000036795	1.59911e+06	2.44517e+06	304350	807846
ENSBTAP00000034522	1	1	31.41	138650	1.52054	2.23264	EIF5B	EIF5B|HGNC Symbol|eukaryotic translation initiation factor 5B [Source:HGNC Symbol;Acc:30793]|11|ENSBTAG00000034255|ENSBTAT00000034635	29879.8	45433.6	20220.6	45145.4
ENSBTAP00000028740	1	1	16.01	128104	1.5198	1.57381	DDB1	DDB1|UniProtKB Gene Name|Bos taurus damage-specific DNA binding protein 1, 127kDa (DDB1), mRNA. [Source:RefSeq mRNA;Acc:NM_001080262]|29|ENSBTAG00000021569|ENSBTAT00000028740	20392.6	30992.6	19522.8	30725.1
ENSBTAP00000000085;ENSBTAP00000052789	3	3	84.14	56230	1.50999	1.11321	ADSL	ADSL|UniProtKB Gene Name|Bos taurus adenylosuccinate lyase (ADSL), mRNA. [Source:RefSeq mRNA;Acc:NM_001102377]|5|ENSBTAG00000000077|ENSBTAT00000000085	170179	256969	151246	168369
ENSBTAP00000008502	3	3	70.85	22635	1.50696	2.35364	RPS9	RPS9|UniProtKB Gene Name|Bos taurus ribosomal protein S9 (RPS9), mRNA. [Source:RefSeq mRNA;Acc:NM_001101152]|18|ENSBTAG00000006487|ENSBTAT00000008502	146341	220530	59736.5	140598
ENSBTAP00000018114	2	1	88.81	30748	1.50391	2.24784	HNRNPAB	HNRNPAB|UniProtKB Gene Name|Bos taurus heterogeneous nuclear ribonucleoprotein A/B (HNRNPAB), mRNA. [Source:RefSeq mRNA;Acc:NM_001040522]|7|ENSBTAG00000013627|ENSBTAT00000018114	406810	611805	228177	512903
ENSBTAP00000018947	11	11	398.75	84351	1.50218	1.65145	TARS	TARS|UniProtKB Gene Name|Bos taurus threonyl-tRNA synthetase (TARS), mRNA. [Source:RefSeq mRNA;Acc:NM_001034370]|20|ENSBTAG00000014261|ENSBTAT00000018947	1.0718e+06	1.61005e+06	742437	1.22609e+06
ENSBTAP00000026261	1	1	31	35325	1.50215	0.94846	PRPS1	PRPS1|UniProtKB Gene Name|Bos taurus phosphoribosyl pyrophosphate synthetase 1 (PRPS1), mRNA. [Source:RefSeq mRNA;Acc:NM_001046189]|X|ENSBTAG00000019703|ENSBTAT00000026261	29764.3	44710.4	26986.7	25595.8
ENSBTAP00000046146	1	1	13.01	40277	1.5012	2.65389	EIF3F	EIF3F|HGNC Symbol|eukaryotic translation initiation factor 3, subunit F [Source:HGNC Symbol;Acc:3275]|15|ENSBTAG00000004861|ENSBTAT00000049219	15614.1	23439.8	3743.43	9934.65
ENSBTAP00000051115	2	2	79.51	94108	1.49505	1.0357	MATR3	|||7|ENSBTAG00000006756|ENSBTAT00000057156	230774	345018	181674	188160
ENSBTAP00000045984	1	1	60.62	69663	1.49318	1.06503	GCLC	GCLC|UniProtKB Gene Name|Bos taurus glutamate-cysteine ligase, catalytic subunit (GCLC), mRNA. [Source:RefSeq mRNA;Acc:NM_001083674]|23|ENSBTAG00000015571|ENSBTAT00000049040	29919.8	44675.7	31393.9	33435.4
ENSBTAP00000033188	2	1	32.16	829008	1.49214	0.693785	MACF1	MACF1|HGNC Symbol|microtubule-actin crosslinking factor 1 [Source:HGNC Symbol;Acc:13664]|3|ENSBTAG00000021024|ENSBTAT00000033270	14160.6	21129.6	20864	14475.1
ENSBTAP00000012544	1	1	36.54	31501	1.49097	2.91997	RPS2	RPS2|UniProtKB Gene Name|Bos taurus ribosomal protein S2 (RPS2), mRNA. [Source:RefSeq mRNA;Acc:NM_001033613]|25|ENSBTAG00000009535|ENSBTAT00000012544	13993.3	20863.6	8808.22	25719.8
ENSBTAP00000019134	1	1	32.68	36849	1.48475	1.79811	EIF3I	EIF3I|UniProtKB Gene Name|Bos taurus eukaryotic translation initiation factor 3, subunit I (EIF3I), mRNA. [Source:RefSeq mRNA;Acc:NM_001015628]|2|ENSBTAG00000014388|ENSBTAT00000019134	11499.5	17073.9	3111.53	5594.86
ENSBTAP00000015924;ENSBTAP00000055082	10	4	362.24	18086	1.48169	0.669351	PPIA	PPIA|UniProtKB Gene Name|Bos taurus peptidylprolyl isomerase A (cyclophilin A) (PPIA), mRNA. [Source:RefSeq mRNA;Acc:NM_178320]|4|ENSBTAG00000012003|ENSBTAT00000015924	1.3585e+06	2.01287e+06	1.91976e+06	1.28499e+06
ENSBTAP00000002938	1	1	28.25	51864	1.47259	1.92356	LUC7L3	LUC7L3|UniProtKB Gene Name|Bos taurus LUC7-like 3 (S. cerevisiae) (LUC7L3), mRNA. [Source:RefSeq mRNA;Acc:NM_001034684]|19|ENSBTAG00000002279|ENSBTAT00000002938	18537.6	27298.3	10819.8	20812.6
ENSBTAP00000008366	1	1	18.84	117833	1.47123	1.26434	MYO1G	MYO1G|HGNC Symbol|myosin IG [Source:HGNC Symbol;Acc:13880]|4|ENSBTAG00000006377|ENSBTAT00000008366	14676.5	21592.5	6952.17	8789.88
ENSBTAP00000021587	2	2	52.14	22113	1.47058	4.03749	RPS7	RPS7|UniProtKB Gene Name|Bos taurus ribosomal protein S7 (RPS7), mRNA. [Source:RefSeq mRNA;Acc:NM_001098874]|8|ENSBTAG00000016224|ENSBTAT00000021587	109205	160595	27160.7	109661
ENSBTAP00000012121	5	5	138.47	100118	1.47037	1.97196	CORO7	CORO7|UniProtKB Gene Name|Bos taurus coronin 7 (CORO7), mRNA. [Source:RefSeq mRNA;Acc:NM_001075903]|25|ENSBTAG00000009201|ENSBTAT00000012121	127889	188044	39286.7	77471.9
ENSBTAP00000016549	2	2	109.99	43263	1.46994	1.22637	ILF2	ILF2|EntrezGene|Bos taurus interleukin enhancer binding factor 2, 45kDa (ILF2), mRNA. [Source:RefSeq mRNA;Acc:NM_001038187]|3|ENSBTAG00000012471|ENSBTAT00000016549	120597	177271	92130.6	112986
ENSBTAP00000008774	7	5	260.33	71359	1.46755	2.05273	SYNCRIP	SYNCRIP|HGNC Symbol|synaptotagmin binding, cytoplasmic RNA interacting protein [Source:HGNC Symbol;Acc:16918]|9|ENSBTAG00000006672|ENSBTAT00000008774	304371	446679	170906	350823
ENSBTAP00000008837	1	1	16.93	40958	1.4659	0.707371	GJA5	GJA5|HGNC Symbol|gap junction protein, alpha 5, 40kDa [Source:HGNC Symbol;Acc:4279]|3|ENSBTAG00000006720|ENSBTAT00000008837	106290	155811	80560.1	56985.8
ENSBTAP00000028687	2	2	127.56	88810	1.46541	0.972511	STAT3	STAT3|UniProtKB Gene Name|Bos taurus signal transducer and activator of transcription 3 (acute-phase response factor) (STAT3), mRNA. [Source:RefSeq mRNA;Acc:NM_001012671]|19|ENSBTAG00000021523|ENSBTAT00000028687	86609.8	126919	115894	112708
ENSBTAP00000006653	2	2	163.32	23700	1.46394	0.656572	TIMP1	TIMP1|UniProtKB Gene Name|Bos taurus TIMP metallopeptidase inhibitor 1 (TIMP1), mRNA. [Source:RefSeq mRNA;Acc:NM_174471]|X|ENSBTAG00000005043|ENSBTAT00000006653	768901	1.12562e+06	1.00006e+06	656612
ENSBTAP00000015996	6	6	297.38	22217	1.4625	0.91869	PRDX2	PRDX2|UniProtKB Gene Name|Bos taurus peroxiredoxin 2 (PRDX2), mRNA. [Source:RefSeq mRNA;Acc:NM_174763]|7|ENSBTAG00000012062|ENSBTAT00000015996	2.70463e+06	3.95552e+06	2.53055e+06	2.32479e+06
ENSBTAP00000010389	1	1	28.39	16984	1.46012	1.55988	FIS1	FIS1|UniProtKB Gene Name|Bos taurus fission 1 (mitochondrial outer membrane) homolog (S. cerevisiae) (FIS1), mRNA. [Source:RefSeq mRNA;Acc:NM_001034784]|25|ENSBTAG00000007900|ENSBTAT00000010389	15401.6	22488.2	10800.6	16847.6
ENSBTAP00000021719	2	2	81.31	76315	1.45677	1.66745	SFPQ	SFPQ|HGNC Symbol|splicing factor proline/glutamine-rich [Source:HGNC Symbol;Acc:10774]|3|ENSBTAG00000016328|ENSBTAT00000021719	197781	288122	126958	211696
ENSBTAP00000002033;ENSBTAP00000036013;ENSBTAP00000013110;ENSBTAP00000016590;ENSBTAP00000016960	7	6	398.47	34289	1.45421	1.72635	HNRNPA1	HNRNPA1|UniProtKB Gene Name|Bos taurus heterogeneous nuclear ribonucleoprotein A1 (HNRNPA1), mRNA. [Source:RefSeq mRNA;Acc:NM_001045911]|5|ENSBTAG00000001553|ENSBTAT00000002033	2.09308e+06	3.04379e+06	1.18057e+06	2.03808e+06
ENSBTAP00000026598	2	2	108.33	96667	1.44954	0.840859	RASA3	RASA3|UniProtKB Gene Name|Bos taurus RAS p21 protein activator 3 (RASA3), mRNA. [Source:RefSeq mRNA;Acc:NM_174676]|12|ENSBTAG00000019967|ENSBTAT00000026598	26757.9	38786.7	139828	117576
ENSBTAP00000038344;ENSBTAP00000052642	8	1	423.91	13911	1.44351	1.55293	H2B	H2B|UniProtKB Gene Name|Bos taurus histone cluster 2, H2be (HIST2H2BE), mRNA. [Source:RefSeq mRNA;Acc:NM_001099384]|3|ENSBTAG00000038025|ENSBTAT00000038531	706129	1.01931e+06	786389	1.22121e+06
ENSBTAP00000027991	2	1	39.15	74045	1.44026	1.5595	KHSRP	KHSRP|HGNC Symbol|KH-type splicing regulatory protein [Source:HGNC Symbol;Acc:6316]|7|ENSBTAG00000021018|ENSBTAT00000027991	54930	79113.8	48051.1	74935.7
ENSBTAP00000009064	2	2	97.15	171465	1.43383	1.70499	EPRS	EPRS|EntrezGene|Bos taurus glutamyl-prolyl-tRNA synthetase (EPRS), mRNA. [Source:RefSeq mRNA;Acc:NM_001243320]|16|ENSBTAG00000006898|ENSBTAT00000009064	63669.1	91291	43181.7	73624.3
ENSBTAP00000007398	1	1	40.58	25724	1.43248	0.949193	PAFAH1B2	PAFAH1B2|UniProtKB Gene Name|Bos taurus platelet-activating factor acetylhydrolase 1b, catalytic subunit 2 (30kDa) (PAFAH1B2), mRNA. [Source:RefSeq mRNA;Acc:NM_174664]|15|ENSBTAG00000005627|ENSBTAT00000007398	13490.9	19325.3	11376.9	10798.9
ENSBTAP00000047838	2	2	30.88	18223	1.43174	1.2407	UBE2I	UBE2I|UniProtKB Gene Name|Bos taurus ubiquitin-conjugating enzyme E2I (UBE2I), mRNA. [Source:RefSeq mRNA;Acc:NM_001099372]|25|ENSBTAG00000038866|ENSBTAT00000056739	203749	291716	183223	227325
ENSBTAP00000013079	1	1	66.94	30154	1.43104	1.86146	RPS3A	RPS3A|UniProtKB Gene Name|Bos taurus ribosomal protein S3A (RPS3A), mRNA. [Source:RefSeq mRNA;Acc:NM_001034038]|17|ENSBTAG00000009908|ENSBTAT00000013079	107256	153488	89326.9	166278
ENSBTAP00000009084	3	1	102.96	51238	1.42836	1.49316	TAF15	TAF15|HGNC Symbol|TAF15 RNA polymerase II, TATA box binding protein (TBP)-associated factor, 68kDa [Source:HGNC Symbol;Acc:11547]|19|ENSBTAG00000006916|ENSBTAT00000009084	44025.8	62884.9	17769.2	26532.2
ENSBTAP00000039003	1	1	68.97	54630	1.42597	1.2643	CTSA	CTSA|UniProtKB Gene Name|Bos taurus cathepsin A (CTSA), mRNA. [Source:RefSeq mRNA;Acc:NM_001035326]|13|ENSBTAG00000027337|ENSBTAT00000039203	29733.7	42399.3	28224.9	35684.7
ENSBTAP00000011952	1	1	25.92	54741	1.42516	3.22006	DDX6	DDX6|HGNC Symbol|DEAD (Asp-Glu-Ala-Asp) box helicase 6 [Source:HGNC Symbol;Acc:2747]|15|ENSBTAG00000009067|ENSBTAT00000011952	22806.9	32503.4	4987.37	16059.6
ENSBTAP00000009152;ENSBTAP00000054964;ENSBTAP00000024473	5	3	245.05	17979	1.41978	1.61814	RPL12	RPL12|UniProtKB Gene Name|60S ribosomal protein L12 [Source:UniProtKB/Swiss-Prot;Acc:P61284]|11|ENSBTAG00000006963|ENSBTAT00000009152	413708	587375	206217	333690
ENSBTAP00000026530	1	1	75.69	18475	1.41968	1.2335	DNPH1	DNPH1|HGNC Symbol|2'-deoxynucleoside 5'-phosphate N-hydrolase 1 [Source:HGNC Symbol;Acc:21218]|23|ENSBTAG00000019913|ENSBTAT00000026530	40874.7	58029.1	21625.7	26675.3
ENSBTAP00000000814	1	1	56.72	15571	1.41814	1.96179	RPS17	RPS17|UniProtKB Gene Name|Bos taurus ribosomal protein S17 (RPS17), mRNA. [Source:RefSeq mRNA;Acc:NM_001099210]|21|ENSBTAG00000000622|ENSBTAT00000000814	122973	174393	74273.9	145710
ENSBTAP00000001791;ENSBTAP00000048421	4	4	94.29	14905	1.41769	1.65517	RPS12	RPS12|UniProtKB Gene Name|Bos taurus ribosomal protein S12 (RPS12), mRNA. [Source:RefSeq mRNA;Acc:NM_001014387]|9|ENSBTAG00000001360|ENSBTAT00000001791	509489	722299	276562	457756
ENSBTAP00000013467	1	1	26.51	26268	1.41406	1.03766	NUDT21	NUDT21|UniProtKB Gene Name|Bos taurus nudix (nucleoside diphosphate linked moiety X)-type motif 21 (NUDT21), mRNA. [Source:RefSeq mRNA;Acc:NM_001035331]|18|ENSBTAG00000010207|ENSBTAT00000013467	57708.5	81603.4	48427.7	50251.4
ENSBTAP00000046975;ENSBTAP00000055044	3	3	96.48	24462	1.40969	1.03912	RAN	RAN|EntrezGene|Uncharacterized protein [Source:UniProtKB/TrEMBL;Acc:G5E619]|X|ENSBTAG00000014223|ENSBTAT00000018906	1.05934e+06	1.49334e+06	936774	973422
ENSBTAP00000012345	3	3	101.08	60334	1.4095	0.822846	LCP2	LCP2|HGNC Symbol|lymphocyte cytosolic protein 2 (SH2 domain containing leukocyte protein of 76kDa) [Source:HGNC Symbol;Acc:6529]|20|ENSBTAG00000009381|ENSBTAT00000012345	155344	218957	249158	205018
ENSBTAP00000018554	1	1	93.34	40902	1.40902	1.55196	PSAT1	PSAT1|UniProtKB Gene Name|Bos taurus phosphoserine aminotransferase 1 (PSAT1), mRNA. [Source:RefSeq mRNA;Acc:NM_001102150]|8|ENSBTAG00000013960|ENSBTAT00000018554	65116.2	91749.9	62525	97036.1
ENSBTAP00000028152	2	2	93.79	80965	1.40011	1.7608	ADD1	ADD1|HGNC Symbol|adducin 1 (alpha) [Source:HGNC Symbol;Acc:243]|6|ENSBTAG00000021128|ENSBTAT00000028152	97184.9	136069	61436.1	108177
ENSBTAP00000055282	1	1	37.45	7175	1.39963	3.57253	PPP1R3B	|||29|ENSBTAG00000047265|ENSBTAT00000065478	7826.41	10954.1	2777.82	9923.87
ENSBTAP00000040892	1	1	39.5	33400	1.38916	1.58356	MPST	MPST|UniProtKB Gene Name|Bos taurus mercaptopyruvate sulfurtransferase (MPST), transcript variant 1, mRNA. [Source:RefSeq mRNA;Acc:NM_001034291]|5|ENSBTAG00000030648|ENSBTAT00000043315	45710.3	63498.9	45230.5	71625.1
ENSBTAP00000053818	1	1	36.86	160630	1.38684	0.861473	ROCK1	ROCK1|HGNC Symbol|Rho-associated, coiled-coil containing protein kinase 1 [Source:HGNC Symbol;Acc:10251]|24|ENSBTAG00000008403|ENSBTAT00000061061	16268.4	22561.6	22492.6	19376.8
ENSBTAP00000028162	7	7	389.38	51272	1.3867	1.34726	HNRNPK	HNRNPK|UniProtKB Gene Name|Bos taurus heterogeneous nuclear ribonucleoprotein K (HNRNPK), mRNA. [Source:RefSeq mRNA;Acc:NM_001034562]|8|ENSBTAG00000021131|ENSBTAT00000028162	996373	1.38167e+06	669864	902479
ENSBTAP00000016774	4	4	123.42	10567	1.38532	1.56099	S100A8	S100A8|UniProtKB Gene Name|Bos taurus S100 calcium binding protein A8 (S100A8), mRNA. [Source:RefSeq mRNA;Acc:NM_001113725]|3|ENSBTAG00000012640|ENSBTAT00000016774	466269	645931	61590.8	96142.7
ENSBTAP00000016708	14	13	1007.18	61110	1.3814	1.01927	HSPD1	HSPD1|HGNC Symbol|heat shock 60kDa protein 1 (chaperonin) [Source:HGNC Symbol;Acc:5261]|2|ENSBTAG00000012586|ENSBTAT00000016708	1.83915e+06	2.5406e+06	2.11995e+06	2.16081e+06
ENSBTAP00000007338	2	2	133.88	48839	1.37831	0.938499	GATM	GATM|UniProtKB Gene Name|Bos taurus glycine amidinotransferase (L-arginine:glycine amidinotransferase) (GATM), mRNA. [Source:RefSeq mRNA;Acc:NM_001045878]|10|ENSBTAG00000005586|ENSBTAT00000007338	127718	176035	452122	424316
ENSBTAP00000020323	1	1	50.89	15978	1.37763	2.0347	RPL32	RPL32|UniProtKB Gene Name|Bos taurus ribosomal protein L32 (RPL32), mRNA. [Source:RefSeq mRNA;Acc:NM_001034783]|22|ENSBTAG00000015283|ENSBTAT00000020323	41334.5	56943.6	15393.8	31321.8
ENSBTAP00000027913;ENSBTAP00000036564	4	3	229.98	29701	1.37743	1.69157	SET	SET|EntrezGene|Bos taurus SET nuclear oncogene (SET), mRNA. [Source:RefSeq mRNA;Acc:NM_001038564]|11|ENSBTAG00000020959|ENSBTAT00000027913	1.91396e+06	2.63635e+06	981237	1.65983e+06
ENSBTAP00000023406	10	10	281.37	25788	1.37741	0.984712	AK2	AK2|UniProtKB Gene Name|Bos taurus adenylate kinase 2 (AK2), mRNA. [Source:RefSeq mRNA;Acc:NM_173889]|2|ENSBTAG00000017605|ENSBTAT00000023406	718304	989401	748840	737392
ENSBTAP00000030612	1	1	41.11	54673	1.37706	2.08248	API5	API5|EntrezGene|Bos taurus apoptosis inhibitor 5 (API5), mRNA. [Source:RefSeq mRNA;Acc:NM_001144083]|15|ENSBTAG00000014474|ENSBTAT00000030639	24237.6	33376.6	7603.34	15833.8
ENSBTAP00000019921	1	1	25.37	42616	1.37657	0.904972	GALK1	GALK1|HGNC Symbol|galactokinase 1 [Source:HGNC Symbol;Acc:4118]|19|ENSBTAG00000014964|ENSBTAT00000019921	39375.3	54202.8	31240.7	28272
ENSBTAP00000027808;ENSBTAP00000031255	3	3	124.25	44005	1.37649	1.55111	MAT2A	MAT2A|UniProtKB Gene Name|Bos taurus methionine adenosyltransferase II, alpha (MAT2A), mRNA. [Source:RefSeq mRNA;Acc:NM_001101131]|11|ENSBTAG00000020873|ENSBTAT00000027808	152955	210541	86312.1	133880
ENSBTAP00000020363;ENSBTAP00000047554;ENSBTAP00000049745	3	3	242.23	32826	1.37533	1.55447	NPM1	NPM1|UniProtKB Gene Name|Bos taurus nucleophosmin (nucleolar phosphoprotein B23, numatrin) (NPM1), mRNA. [Source:RefSeq mRNA;Acc:NM_001035441]|20|ENSBTAG00000015316|ENSBTAT00000020363	772944	1.06305e+06	626769	974292
ENSBTAP00000019834;ENSBTAP00000052696	5	5	231.99	101152	1.37445	1.70613	HK3	HK3|HGNC Symbol|hexokinase 3 (white cell) [Source:HGNC Symbol;Acc:4925]|7|ENSBTAG00000014898|ENSBTAT00000019834	346925	476831	91432	155995
ENSBTAP00000014926;ENSBTAP00000001588	5	2	156.76	33921	1.37271	1.45162	GIMAP7	GIMAP7|UniProtKB Gene Name|Bos taurus GTPase, IMAP family member 7 (GIMAP7), mRNA. [Source:RefSeq mRNA;Acc:NM_001080257]|4|ENSBTAG00000030940|ENSBTAT00000014926	141133	193735	74641.5	108351
ENSBTAP00000054889;ENSBTAP00000054832;ENSBTAP00000022272	3	3	166.08	57241	1.37147	1.28878	PTBP1	PTBP1|UniProtKB Gene Name|Bos taurus polypyrimidine tract binding protein 1 (PTBP1), mRNA. [Source:RefSeq mRNA;Acc:NM_174442]|7|ENSBTAG00000045828|ENSBTAT00000066209	293289	402236	186457	240303
ENSBTAP00000025586	1	1	15.24	49709	1.36861	1.11471	TUFM	TUFM|UniProtKB Gene Name|Bos taurus Tu translation elongation factor, mitochondrial (TUFM), mRNA. [Source:RefSeq mRNA;Acc:NM_174207]|25|ENSBTAG00000019216|ENSBTAT00000025586	19037.3	26054.6	21284	23725.6
ENSBTAP00000005558;ENSBTAP00000054029	2	2	61.91	24865	1.36737	1.15922	LYPLA1	LYPLA1|UniProtKB Gene Name|Bos taurus lysophospholipase I (LYPLA1), mRNA. [Source:RefSeq mRNA;Acc:NM_001034688]|14|ENSBTAG00000004243|ENSBTAT00000005558	126944	173580	68426.3	79321.1
ENSBTAP00000016399	1	1	48.67	38086	1.36661	0.67427	MAT2B	MAT2B|UniProtKB Gene Name|Bos taurus methionine adenosyltransferase II, beta (MAT2B), mRNA. [Source:RefSeq mRNA;Acc:NM_001046526]|7|ENSBTAG00000012350|ENSBTAT00000016399	8032.36	10977.1	3143.91	2119.84
ENSBTAP00000028671	1	1	18.03	52366	1.36555	1.52015	DNPEP	DNPEP|UniProtKB Gene Name|Bos taurus aspartyl aminopeptidase (DNPEP), mRNA. [Source:RefSeq mRNA;Acc:NM_001045952]|2|ENSBTAG00000021514|ENSBTAT00000028671	16184.2	22100.3	5308.34	8069.46
ENSBTAP00000021651	3	3	146.63	12947	1.36505	2.19697	RPL30	RPL30|UniProtKB Gene Name|Bos taurus ribosomal protein L30 (RPL30), mRNA. [Source:RefSeq mRNA;Acc:NM_001034434]|14|ENSBTAG00000016278|ENSBTAT00000021651	305924	417600	141821	311578
ENSBTAP00000003261	2	2	27.92	85766	1.36336	1.87232	HNRNPUL2	HNRNPUL2|EntrezGene|Bos taurus heterogeneous nuclear ribonucleoprotein U-like 2 (HNRNPUL2), mRNA. [Source:RefSeq mRNA;Acc:NM_001206245]|29|ENSBTAG00000002510|ENSBTAT00000003261	111347	151807	71171.8	133256
ENSBTAP00000019475	1	1	32.87	76425	1.36301	1.33923	RARS	RARS|UniProtKB Gene Name|Bos taurus arginyl-tRNA synthetase (RARS), mRNA. [Source:RefSeq mRNA;Acc:NM_001105338]|7|ENSBTAG00000014626|ENSBTAT00000019475	36134.7	49252	18950.6	25379.2
ENSBTAP00000035425	3	3	81.54	38388	1.36165	1.3973	AHSA1	AHSA1|UniProtKB Gene Name|Bos taurus AHA1, activator of heat shock 90kDa protein ATPase homolog 1 (yeast) (AHSA1), mRNA. [Source:RefSeq mRNA;Acc:NM_001034666]|10|ENSBTAG00000020477|ENSBTAT00000035554	153222	208635	134714	188236
ENSBTAP00000009471;ENSBTAP00000011811;ENSBTAP00000050955	7	3	261.31	14157	1.36161	1.15353	H2A	||Histone H2A [Source:UniProtKB/TrEMBL;Acc:E1BIL5]|23|ENSBTAG00000031768|ENSBTAT00000009471	4.62414e+06	6.2963e+06	4.84684e+06	5.59095e+06
ENSBTAP00000026639	1	1	72.06	78820	1.36101	0.924898	RAP1GAP2	RAP1GAP2|HGNC Symbol|RAP1 GTPase activating protein 2 [Source:HGNC Symbol;Acc:29176]|19|ENSBTAG00000020000|ENSBTAT00000026639	20082.2	27332.1	39966.9	36965.4
ENSBTAP00000028093	1	1	27.92	16549	1.36019	1.68883	RPS16	RPS16|UniProtKB Gene Name|Bos taurus ribosomal protein S16 (RPS16), mRNA. [Source:RefSeq mRNA;Acc:NM_001033624]|18|ENSBTAG00000021093|ENSBTAT00000028093	78624.1	106944	66815	112839
ENSBTAP00000012929;ENSBTAP00000040820	6	6	330.47	66921	1.35918	1.06599	BCNT	BCNT|UniProtKB Gene Name|Bos taurus craniofacial development protein 2 (CFDP2), mRNA. [Source:RefSeq mRNA;Acc:NM_174800]|18|ENSBTAG00000009805|ENSBTAT00000012929	613616	834015	407299	434178
ENSBTAP00000019342	1	1	79.1	23152	1.3589	1.83089	TNFAIP8	TNFAIP8|UniProtKB Gene Name|Bos taurus tumor necrosis factor, alpha-induced protein 8 (TNFAIP8), mRNA. [Source:RefSeq mRNA;Acc:NM_001083711]|7|ENSBTAG00000014551|ENSBTAT00000019342	126710	172186	42016.2	76926.9
ENSBTAP00000010351	8	8	356.09	87503	1.3587	1.53662	STAT1	STAT1|UniProtKB Gene Name|Bos taurus signal transducer and activator of transcription 1, 91kDa (STAT1), mRNA. [Source:RefSeq mRNA;Acc:NM_001077900]|2|ENSBTAG00000007867|ENSBTAT00000010351	555037	754129	423170	650251
ENSBTAP00000022054	5	3	170.49	71197	1.35734	2.0551	HNRNPR	HNRNPR|UniProtKB Gene Name|Bos taurus heterogeneous nuclear ribonucleoprotein R (HNRNPR), mRNA. [Source:RefSeq mRNA;Acc:NM_001082608]|2|ENSBTAG00000016578|ENSBTAT00000022054	177017	240271	92095.8	189266
ENSBTAP00000018595	1	1	32.39	11425	1.35024	1.34904	ACYP1	ACYP1|UniProtKB Gene Name|Bos taurus acylphosphatase 1, erythrocyte (common) type (ACYP1), mRNA. [Source:RefSeq mRNA;Acc:NM_001045982]|10|ENSBTAG00000013992|ENSBTAT00000018595	20497.9	27677.2	17846.6	24075.8
ENSBTAP00000021529;ENSBTAP00000038315	15	15	755.42	77863	1.34892	1.53965	NCL	NCL|UniProtKB Gene Name|Bos taurus nucleolin (NCL), mRNA. [Source:RefSeq mRNA;Acc:NM_001206660]|2|ENSBTAG00000016174|ENSBTAT00000021529	3.63287e+06	4.90045e+06	2.54368e+06	3.91637e+06
ENSBTAP00000011314	3	3	107.71	56648	1.34814	1.40098	RCC2	RCC2|UniProtKB Gene Name|Bos taurus regulator of chromosome condensation 2 (RCC2), mRNA. [Source:RefSeq mRNA;Acc:NM_001101911]|2|ENSBTAG00000008579|ENSBTAT00000011314	146838	197957	66688.2	93428.5
ENSBTAP00000022576;ENSBTAP00000005802	5	1	156.51	13501	1.34814	1.79386	H2AFV	H2AFV|UniProtKB Gene Name|Bos taurus H2A histone family, member V (H2AFV), mRNA. [Source:RefSeq mRNA;Acc:NM_001038197]|4|ENSBTAG00000016975|ENSBTAT00000022576	377087	508365	405017	726545
ENSBTAP00000019719	14	14	779.48	76202	1.34478	1.2684	ANXA6	ANXA6|UniProtKB Gene Name|Bos taurus annexin A6 (ANXA6), mRNA. [Source:RefSeq mRNA;Acc:NM_001103224]|7|ENSBTAG00000014809|ENSBTAT00000019719	1.85955e+06	2.50069e+06	1.30883e+06	1.66011e+06
ENSBTAP00000009272	1	1	85.07	96307	1.34383	1.79342	FDPS	FDPS|UniProtKB Gene Name|Bos taurus farnesyl diphosphate synthase (FDPS), mRNA. [Source:RefSeq mRNA;Acc:NM_177497]|3|ENSBTAG00000003948|ENSBTAT00000009272	415361	558173	296597	531924
ENSBTAP00000041860	3	3	137.55	11146	1.34198	1.16436	TXN	TXN|UniProtKB Gene Name|Bos taurus thioredoxin (TXN), mRNA. [Source:RefSeq mRNA;Acc:NM_173968]|8|ENSBTAG00000002953|ENSBTAT00000044356	1.73774e+06	2.33201e+06	1.39919e+06	1.62916e+06
ENSBTAP00000016577	1	1	36.63	44400	1.33992	0.857871	SF3B4	SF3B4|UniProtKB Gene Name|Bos taurus splicing factor 3b, subunit 4, 49kDa (SF3B4), mRNA. [Source:RefSeq mRNA;Acc:NM_001205584]|3|ENSBTAG00000012495|ENSBTAT00000016577	43495.2	58280	41832.9	35887.3
ENSBTAP00000049292	1	1	55.18	16953	1.33847	0.652948	UBE2D2	UBE2D2|UniProtKB Gene Name|Bos taurus ubiquitin-conjugating enzyme E2D 2 (UBE2D2), mRNA. [Source:RefSeq mRNA;Acc:NM_001046496]|7|ENSBTAG00000004161|ENSBTAT00000055723	45357.7	60709.8	69189	45176.9
ENSBTAP00000048183	4	4	178.82	35637	1.33425	1.41268	RPLP0	RPLP0|EntrezGene|Bos taurus ribosomal protein, large, P0 (RPLP0), mRNA. [Source:RefSeq mRNA;Acc:NM_001012682]|17|ENSBTAG00000017389|ENSBTAT00000055086	652354	870406	427609	604074
ENSBTAP00000035133	1	1	15.43	49228	1.33247	1.16705	ETF1	ETF1|UniProtKB Gene Name|Bos taurus eukaryotic translation termination factor 1 (ETF1), mRNA. [Source:RefSeq mRNA;Acc:NM_001076254]|7|ENSBTAG00000011415|ENSBTAT00000035255	50242.2	66946.4	41317.2	48219.3
ENSBTAP00000020512	3	3	167.62	18950	1.33243	0.689758	DSTN	DSTN|UniProtKB Gene Name|Bos taurus destrin (actin depolymerizing factor) (DSTN), mRNA. [Source:RefSeq mRNA;Acc:NM_001015586]|13|ENSBTAG00000015434|ENSBTAT00000020512	345249	460018	472093	325630
ENSBTAP00000000518	1	1	34.73	31685	1.33037	0.976852	APOA1BP	APOA1BP|UniProtKB Gene Name|Bos taurus apolipoprotein A-I binding protein (APOA1BP), mRNA. [Source:RefSeq mRNA;Acc:NM_205796]|3|ENSBTAG00000000404|ENSBTAT00000000518	77126.3	102606	97958.8	95691.2
ENSBTAP00000003559	9	9	440.61	35960	1.32546	1.17895	APEX1	APEX1|UniProtKB Gene Name|Bos taurus APEX nuclease (multifunctional DNA repair enzyme) 1 (APEX1), mRNA. [Source:RefSeq mRNA;Acc:NM_176609]|10|ENSBTAG00000002745|ENSBTAT00000003559	1.35552e+06	1.79669e+06	875156	1.03176e+06
ENSBTAP00000003959	1	1	21.41	7959	1.32461	1.21226	GNG2	GNG2|UniProtKB Gene Name|Bos taurus guanine nucleotide binding protein (G protein), gamma 2 (GNG2), mRNA. [Source:RefSeq mRNA;Acc:NM_174072]|10|ENSBTAG00000003043|ENSBTAT00000003959	40669.2	53871.1	29053.5	35220.4
ENSBTAP00000003602	2	2	67.21	100365	1.32117	1.72554	SF3B2	SF3B2|HGNC Symbol|splicing factor 3b, subunit 2, 145kDa [Source:HGNC Symbol;Acc:10769]|29|ENSBTAG00000002778|ENSBTAT00000003602	69289.4	91542.9	35131.1	60620.3
ENSBTAP00000006990;ENSBTAP00000049139	2	1	79.32	28774	1.32098	1.8234	RPS6	RPS6|EntrezGene|40S ribosomal protein S6 [Source:UniProtKB/TrEMBL;Acc:F1MKZ5]|2|ENSBTAG00000005315|ENSBTAT00000006990	132196	174628	88416.4	161219
ENSBTAP00000023094;ENSBTAP00000012026	4	4	203.89	35960	1.32043	1.36369	YBX1	YBX1|EntrezGene|Bos taurus Y box binding protein 1 (YBX1), mRNA. [Source:RefSeq mRNA;Acc:NM_174815]|3|ENSBTAG00000017368|ENSBTAT00000023094	777644	1.02682e+06	615227	838982
ENSBTAP00000053400	3	3	111.6	20676	1.31885	0.631885	PDAP1	PDAP1|HGNC Symbol|PDGFA associated protein 1 [Source:HGNC Symbol;Acc:14634]|25|ENSBTAG00000044040|ENSBTAT00000061310	166088	219045	203140	128361
ENSBTAP00000040899	3	3	120.09	36371	1.31665	1.53104	EIF2S1	EIF2S1|UniProtKB Gene Name|Bos taurus eukaryotic translation initiation factor 2, subunit 1 alpha, 35kDa (EIF2S1), mRNA. [Source:RefSeq mRNA;Acc:NM_175813]|10|ENSBTAG00000016311|ENSBTAT00000043322	228460	300803	134695	206223
ENSBTAP00000027780	1	1	41.59	102755	1.31629	0.960187	PIK3CG	PIK3CG|UniProtKB Gene Name|Bos taurus phosphoinositide-3-kinase, catalytic, gamma polypeptide (PIK3CG), mRNA. [Source:RefSeq mRNA;Acc:NM_001102125]|4|ENSBTAG00000020848|ENSBTAT00000027780	19429.1	25574.4	35455.4	34043.8
ENSBTAP00000026366	1	1	59.33	25963	1.31585	1.29011	PAFAH1B3	PAFAH1B3|UniProtKB Gene Name|Bos taurus platelet-activating factor acetylhydrolase 1b, catalytic subunit 3 (29kDa) (PAFAH1B3), mRNA. [Source:RefSeq mRNA;Acc:NM_174665]|18|ENSBTAG00000019787|ENSBTAT00000026366	18174.2	23914.5	10814.4	13951.8
ENSBTAP00000007443	2	2	70.2	33867	1.31525	0.981696	CRK	CRK|HGNC Symbol|v-crk avian sarcoma virus CT10 oncogene homolog [Source:HGNC Symbol;Acc:2362]|19|ENSBTAG00000005665|ENSBTAT00000007443	44533.9	58573.2	81364.5	79875.2
ENSBTAP00000003545	1	1	27.53	35874	1.31467	2.55228	EIF3G	EIF3G|EntrezGene|Bos taurus eukaryotic translation initiation factor 3, subunit G (EIF3G), mRNA. [Source:RefSeq mRNA;Acc:NM_001079623]|7|ENSBTAG00000002734|ENSBTAT00000003545	59360.2	78039.3	22331.3	56995.8
ENSBTAP00000007571	3	1	152.76	52436	1.30977	1.90103	FUS	FUS|UniProtKB Gene Name|Bos taurus fused in sarcoma (FUS), mRNA. [Source:RefSeq mRNA;Acc:NM_173912]|25|ENSBTAG00000005757|ENSBTAT00000007571	155269	203366	74882.5	142354
ENSBTAP00000009923	5	5	214.04	61992	1.30923	0.991394	GLUD1	GLUD1|UniProtKB Gene Name|Glutamate dehydrogenase 1, mitochondrial [Source:UniProtKB/Swiss-Prot;Acc:P00366]|28|ENSBTAG00000007540|ENSBTAT00000009923	193229	252982	260296	258056
ENSBTAP00000034086;ENSBTAP00000044384	2	2	76.7	15376	1.30838	1.58467	H3F3A	H3F3A|UniProtKB Gene Name|Bos taurus H3 histone, family 3A (H3F3A), mRNA. [Source:RefSeq mRNA;Acc:NM_001014389]|16|ENSBTAG00000024561|ENSBTAT00000034186	1.89274e+07	2.47643e+07	1.63233e+07	2.58669e+07
ENSBTAP00000015381	1	1	19.92	40574	1.30676	1.12624	CD44	CD44|UniProtKB Gene Name|Bos taurus CD44 molecule (Indian blood group) (CD44), mRNA. [Source:RefSeq mRNA;Acc:NM_174013]|15|ENSBTAG00000011578|ENSBTAT00000015381	100071	130769	57842.3	65144.3
ENSBTAP00000029147	1	1	23.81	14217	1.30618	0.425989	TXNDC17	TXNDC17|EntrezGene|Bos taurus thioredoxin domain containing 17 (TXNDC17), mRNA. [Source:RefSeq mRNA;Acc:NM_001205821]|19|ENSBTAG00000021864|ENSBTAT00000029147	336616	439681	529941	225749
ENSBTAP00000046803;ENSBTAP00000015863	5	2	128.43	46307	1.30557	0.596983	PRKACB	PRKACB|UniProtKB Gene Name|Bos taurus protein kinase, cAMP-dependent, catalytic, beta (PRKACB), mRNA. [Source:RefSeq mRNA;Acc:NM_174585]|3|ENSBTAG00000011953|ENSBTAT00000050033	80638.6	105280	210232	125505
ENSBTAP00000015208	1	1	31.41	17250	1.30537	0.946113	HINT2	HINT2|UniProtKB Gene Name|Bos taurus histidine triad nucleotide binding protein 2 (HINT2), mRNA. [Source:RefSeq mRNA;Acc:NM_174340]|8|ENSBTAG00000011444|ENSBTAT00000015208	27687.7	36142.7	31408.6	29716
ENSBTAP00000005311	3	3	84.33	33649	1.30476	1.0935	BPNT1	BPNT1|UniProtKB Gene Name|Bos taurus 3'(2'), 5'-bisphosphate nucleotidase 1 (BPNT1), mRNA. [Source:RefSeq mRNA;Acc:NM_001034539]|16|ENSBTAG00000004064|ENSBTAT00000005311	183184	239010	148093	161939
ENSBTAP00000052573	1	1	41.3	52187	1.30441	0.498321	CD5L	CD5L|HGNC Symbol|CD5 molecule-like [Source:HGNC Symbol;Acc:1690]|3|ENSBTAG00000022514|ENSBTAT00000013933	17968.4	23438.2	12535.6	6246.76
ENSBTAP00000017211;ENSBTAP00000041101	4	4	249.68	42361	1.30192	1.73353	SERBP1	SERBP1|UniProtKB Gene Name|Bos taurus SERPINE1 mRNA binding protein 1 (SERBP1), mRNA. [Source:RefSeq mRNA;Acc:NM_001046449]|3|ENSBTAG00000012957|ENSBTAT00000017211	615739	801646	329858	571819
ENSBTAP00000015873	5	5	215.07	46655	1.30161	1.40759	GOT1	GOT1|UniProtKB Gene Name|Bos taurus glutamic-oxaloacetic transaminase 1, soluble (aspartate aminotransferase 1) (GOT1), mRNA. [Source:RefSeq mRNA;Acc:NM_177502]|26|ENSBTAG00000011960|ENSBTAT00000015873	257003	334518	264026	371641
ENSBTAP00000022180	2	2	30.3	40994	1.29783	1.17309	PPID	PPID|UniProtKB Gene Name|Bos taurus peptidylprolyl isomerase D (PPID), mRNA. [Source:RefSeq mRNA;Acc:NM_174153]|17|ENSBTAG00000016680|ENSBTAT00000022180	88127.4	114374	111012	130228
ENSBTAP00000046882	1	1	77.06	50193	1.29746	1.17474	ANXA7	ANXA7|UniProtKB Gene Name|Bos taurus annexin A7 (ANXA7), mRNA. [Source:RefSeq mRNA;Acc:NM_001075991]|28|ENSBTAG00000020218|ENSBTAT00000050132	92538.6	120065	72956.4	85704.7
ENSBTAP00000042386	2	2	124.43	31565	1.297	0.924029	ECHS1	ECHS1|UniProtKB Gene Name|Bos taurus enoyl CoA hydratase, short chain, 1, mitochondrial (ECHS1), mRNA. [Source:RefSeq mRNA;Acc:NM_001025206]|26|ENSBTAG00000017710|ENSBTAT00000044947	186817	242300	388038	358558
ENSBTAP00000010022	4	4	218.06	45132	1.29602	0.976665	CATD	CATD|UniProtKB Gene Name|Bos taurus cathepsin D (CTSD), mRNA. [Source:RefSeq mRNA;Acc:NM_001166521]|29|ENSBTAG00000007622|ENSBTAT00000010022	735235	952879	1.01509e+06	991405
ENSBTAP00000003999	1	1	26.18	71003	1.29309	1.73963	ACADVL	ACADVL|UniProtKB Gene Name|Bos taurus acyl-CoA dehydrogenase, very long chain (ACADVL), mRNA. [Source:RefSeq mRNA;Acc:NM_174494]|19|ENSBTAG00000003072|ENSBTAT00000003999	15080.3	19500.1	7495.21	13038.9
ENSBTAP00000009440	3	3	177.66	47882	1.29258	1.03167	GOT2	GOT2|UniProtKB Gene Name|Bos taurus glutamic-oxaloacetic transaminase 2, mitochondrial (aspartate aminotransferase 2) (GOT2), mRNA. [Source:RefSeq mRNA;Acc:NM_174806]|18|ENSBTAG00000007172|ENSBTAT00000009440	449832	581443	510887	527065
ENSBTAP00000004890	2	2	84.03	46360	1.29051	1.84646	DNAJA2	DNAJA2|UniProtKB Gene Name|Bos taurus DnaJ (Hsp40) homolog, subfamily A, member 2 (DNAJA2), mRNA. [Source:RefSeq mRNA;Acc:NM_001040491]|18|ENSBTAG00000003757|ENSBTAT00000004890	64386.5	83091.2	44907.8	82920.3
ENSBTAP00000013146	1	1	45.29	11392	1.29002	0.101132	CCL2	CCL2|UniProtKB Gene Name|Bos taurus chemokine (C-C motif) ligand 2 (CCL2), mRNA. [Source:RefSeq mRNA;Acc:NM_174006]|19|ENSBTAG00000037811|ENSBTAT00000013146	54232.4	69960.8	923821	93427.5
ENSBTAP00000017332	3	3	174.02	17105	1.28826	1.10184	UBE2L3	UBE2L3|EntrezGene|Bos taurus ubiquitin-conjugating enzyme E2L 3 (UBE2L3), mRNA. [Source:RefSeq mRNA;Acc:NM_001078094]|17|ENSBTAG00000013038|ENSBTAT00000017332	475301	612309	348805	384329
ENSBTAP00000026116	2	2	131.31	38470	1.28724	1.44388	E1BC32	||Uncharacterized protein [Source:UniProtKB/TrEMBL;Acc:E1BC32]|10|ENSBTAG00000019601|ENSBTAT00000026116	154889	199379	149098	215279
ENSBTAP00000027941	4	4	194.49	60106	1.28603	0.989062	CAT	CAT|UniProtKB Gene Name|Bos taurus catalase (CAT), mRNA. [Source:RefSeq mRNA;Acc:NM_001035386]|15|ENSBTAG00000020980|ENSBTAT00000027941	240347	309094	217221	214845
ENSBTAP00000021436;ENSBTAP00000001547	7	7	375.65	39679	1.28349	1.96004	H2AFY	H2AFY|UniProtKB Gene Name|Bos taurus H2A histone family, member Y (H2AFY), mRNA. [Source:RefSeq mRNA;Acc:NM_001046340]|7|ENSBTAG00000016105|ENSBTAT00000021436	804043	1.03198e+06	674807	1.32265e+06
ENSBTAP00000010176	3	3	186.1	15004	1.28322	1.61513	UBA52	UBA52|UniProtKB Gene Name|Bos taurus ubiquitin A-52 residue ribosomal protein fusion product 1 (UBA52), mRNA. [Source:RefSeq mRNA;Acc:NM_001076363]|7|ENSBTAG00000007737|ENSBTAT00000010176	3.71668e+06	4.76932e+06	3.31287e+06	5.3507e+06
ENSBTAP00000021033	2	2	74.49	21034	1.28309	2.39847	RPL18A	RPL18A|UniProtKB Gene Name|Bos taurus ribosomal protein L18a (RPL18A), mRNA. [Source:RefSeq mRNA;Acc:NM_001033619]|7|ENSBTAG00000015831|ENSBTAT00000021033	102249	131194	38416.6	92140.9
ENSBTAP00000028983	2	2	61.45	51365	1.28253	1.19997	PSMC3	PSMC3|UniProtKB Gene Name|26S protease regulatory subunit 6A [Source:RefSeq peptide;Acc:NP_001179113]|15|ENSBTAG00000021744|ENSBTAT00000028983	58971.4	75632.9	61729.6	74073.8
ENSBTAP00000041236	6	6	232.45	57170	1.28099	1.63344	SAMHD1	SAMHD1|UniProtKB Gene Name|Bos taurus SAM domain and HD domain 1 (SAMHD1), mRNA. [Source:RefSeq mRNA;Acc:NM_001075861]|13|ENSBTAG00000022007|ENSBTAT00000043682	567503	726967	360026	588080
ENSBTAP00000041066	5	3	162.3	12840	1.27918	1.20032	NME2	NME2|UniProtKB Gene Name|Bos taurus non-metastatic cells 2, protein (NM23B) expressed in (NME2), mRNA. [Source:RefSeq mRNA;Acc:NM_001076376]|19|ENSBTAG00000047186|ENSBTAT00000043502	1.8365e+06	2.34921e+06	1.55534e+06	1.86691e+06
ENSBTAP00000012454	6	6	253.31	30305	1.27827	1.08102	MDH2	MDH2|UniProtKB Gene Name|Bos taurus malate dehydrogenase 2, NAD (mitochondrial) (MDH2), mRNA. [Source:RefSeq mRNA;Acc:NM_001013587]|25|ENSBTAG00000009462|ENSBTAT00000012454	845648	1.08097e+06	932602	1.00816e+06
ENSBTAP00000019596	8	2	442.78	46601	1.27634	1.53693	EIF4A2	EIF4A2|UniProtKB Gene Name|Bos taurus eukaryotic translation initiation factor 4A2 (EIF4A2), mRNA. [Source:RefSeq mRNA;Acc:NM_001034044]|1|ENSBTAG00000014724|ENSBTAT00000019596	145056	185141	94316.6	144958
ENSBTAP00000021268	2	2	153.09	23033	1.27594	2.36108	RPS5	RPS5|UniProtKB Gene Name|Bos taurus ribosomal protein S5 (RPS5), mRNA. [Source:RefSeq mRNA;Acc:NM_001015531]|18|ENSBTAG00000015989|ENSBTAT00000021268	257401	328427	121614	287142
ENSBTAP00000016153	3	3	87.62	13501	1.27434	1.36737	SNRPD2	SNRPD2|UniProtKB Gene Name|Bos taurus small nuclear ribonucleoprotein D2 polypeptide 16.5kDa (SNRPD2), mRNA. [Source:RefSeq mRNA;Acc:NM_001034476]|18|ENSBTAG00000012177|ENSBTAT00000016153	198391	252817	146312	200063
ENSBTAP00000017497	29	23	1550.74	71424	1.27406	1.15704	HSPA8	HSPA8|UniProtKB Gene Name|Bos taurus heat shock 70kDa protein 8 (HSPA8), mRNA. [Source:RefSeq mRNA;Acc:NM_174345]|15|ENSBTAG00000013162|ENSBTAT00000017497	1.62695e+07	2.07283e+07	1.65525e+07	1.91519e+07
ENSBTAP00000025024	1	1	94.88	29807	1.27371	2.20134	RPS4	RPS4|UniProtKB Gene Name|Bos taurus ribosomal protein S4, X-linked (RPS4X), mRNA. [Source:RefSeq mRNA;Acc:NM_001035445]|X|ENSBTAG00000018800|ENSBTAT00000025024	174997	222896	77382.4	170345
ENSBTAP00000010765;ENSBTAP00000027104;ENSBTAP00000044907	10	9	391.91	59314	1.27328	1.17051	CCT6A	CCT6A|HGNC Symbol|chaperonin containing TCP1, subunit 6A (zeta 1) [Source:HGNC Symbol;Acc:1620]|25|ENSBTAG00000008184|ENSBTAT00000010765	695366	885395	681215	797367
ENSBTAP00000008727	5	2	141.57	40708	1.27286	0.794951	PRKACA	PRKACA|UniProtKB Gene Name|Bos taurus protein kinase, cAMP-dependent, catalytic, alpha (PRKACA), mRNA. [Source:RefSeq mRNA;Acc:NM_174584]|7|ENSBTAG00000006642|ENSBTAT00000008727	92303.6	117490	94260.5	74932.5
ENSBTAP00000021434	2	2	94.73	21757	1.27255	0.93699	CBFB	CBFB|HGNC Symbol|core-binding factor, beta subunit [Source:HGNC Symbol;Acc:1539]|18|ENSBTAG00000016103|ENSBTAT00000021434	126879	161459	86803.9	81334.4
ENSBTAP00000024458	2	2	100.98	39953	1.2717	1.39211	SMS	SMS|UniProtKB Gene Name|Bos taurus spermine synthase (SMS), mRNA. [Source:RefSeq mRNA;Acc:NM_001035471]|X|ENSBTAG00000018382|ENSBTAT00000024458	105921	134700	77056	107271
ENSBTAP00000051979	1	1	35.91	13289	1.27104	2.6432	RPS26	RPS26|EntrezGene|Bos taurus ribosomal protein S26 (RPS26), mRNA. [Source:RefSeq mRNA;Acc:NM_001015561]|5|ENSBTAG00000038896|ENSBTAT00000054840	46695.7	59351.9	17252.6	45602.1
ENSBTAP00000042843	3	3	161.5	36347	1.26966	1.47595	ANXA3	ANXA3|HGNC Symbol|annexin A3 [Source:HGNC Symbol;Acc:541]|6|ENSBTAG00000010153|ENSBTAT00000045455	168036	213348	31343	46260.7
ENSBTAP00000013985	6	6	199.06	103805	1.26606	1.25628	PAICS	PAICS|UniProtKB Gene Name|Bos taurus phosphoribosylaminoimidazole carboxylase, phosphoribosylaminoimidazole succinocarboxamide synthetase (PAICS), mRNA. [Source:RefSeq mRNA;Acc:NM_205813]|6|ENSBTAG00000010577|ENSBTAT00000013985	396893	502491	360176	452482
ENSBTAP00000013431	1	1	22.63	24519	1.26411	1.66809	GRPEL1	GRPEL1|UniProtKB Gene Name|Bos taurus GrpE-like 1, mitochondrial (E. coli) (GRPEL1), mRNA. [Source:RefSeq mRNA;Acc:NM_001034501]|6|ENSBTAG00000010181|ENSBTAT00000013431	18130.8	22919.5	15185.2	25330.4
ENSBTAP00000055644	2	2	97.78	16786	1.26393	1.33727	TMOD3	|||10|ENSBTAG00000047868|ENSBTAT00000066137	191889	242534	200358	267933
ENSBTAP00000029284	3	3	73.93	14360	1.26347	1.70673	SUB1	SUB1|UniProtKB Gene Name|Bos taurus SUB1 homolog (S. cerevisiae) (SUB1), mRNA. [Source:RefSeq mRNA;Acc:NM_001105407]|20|ENSBTAG00000021965|ENSBTAT00000029284	845805	1.06865e+06	362080	617974
ENSBTAP00000002225	1	1	30.96	33760	1.26344	1.62143	TRA2B	TRA2B|UniProtKB Gene Name|Bos taurus transformer 2 beta homolog (Drosophila) (TRA2B), mRNA. [Source:RefSeq mRNA;Acc:NM_001034776]|1|ENSBTAG00000001697|ENSBTAT00000002225	31852.8	40244	25124.9	40738.2
ENSBTAP00000009998	6	6	230.95	51869	1.26231	1.76793	FKBP4	FKBP4|EntrezGene|Bos taurus FK506 binding protein 4, 59kDa (FKBP4), mRNA. [Source:RefSeq mRNA;Acc:NM_001034322]|5|ENSBTAG00000007605|ENSBTAT00000009998	313860	396188	205944	364096
ENSBTAP00000005789	1	1	24.42	38276	1.25809	2.0782	NUDC	NUDC|UniProtKB Gene Name|Bos taurus nuclear distribution gene C homolog (A. nidulans) (NUDC), mRNA. [Source:RefSeq mRNA;Acc:NM_001075607]|2|ENSBTAG00000004416|ENSBTAT00000005789	75485.9	94968.3	40755.7	84698.6
ENSBTAP00000049659	3	3	155.05	25716	1.25742	1.20671	QDPR	QDPR|UniProtKB Gene Name|Bos taurus quinoid dihydropteridine reductase (QDPR), mRNA. [Source:RefSeq mRNA;Acc:NM_001076492]|6|ENSBTAG00000040333|ENSBTAT00000055681	102296	128629	103853	125321
ENSBTAP00000022946	2	2	108.49	22643	1.25526	1.44807	VBP1	VBP1|EntrezGene|Bos taurus von Hippel-Lindau binding protein 1 (VBP1), mRNA. [Source:RefSeq mRNA;Acc:NM_001038516]|X|ENSBTAG00000017265|ENSBTAT00000022946	80316.8	100819	74776.2	108282
ENSBTAP00000007436	2	2	50.96	100935	1.25339	1.17114	PSMD2	PSMD2|UniProtKB Gene Name|Bos taurus proteasome (prosome, macropain) 26S subunit, non-ATPase, 2 (PSMD2), mRNA. [Source:RefSeq mRNA;Acc:NM_001101197]|1|ENSBTAG00000005660|ENSBTAT00000007436	49307.4	61801.2	57137.2	66916
ENSBTAP00000041298	3	3	66.4	27686	1.25177	1.83232	LGALS3	LGALS3|UniProtKB Gene Name|Bos taurus lectin, galactoside-binding, soluble, 3 (LGALS3), mRNA. [Source:RefSeq mRNA;Acc:NM_001102341]|10|ENSBTAG00000002326|ENSBTAT00000043753	243915	305327	73465.1	134611
ENSBTAP00000048068	2	1	135.62	41646	1.24895	1.27155	LOC512672	||Bos taurus major histocompatibility complex, class I (LOC512672), mRNA. [Source:RefSeq mRNA;Acc:NM_001076841]|23|ENSBTAG00000038619|ENSBTAT00000052679	95686	119507	85381.5	108567
ENSBTAP00000026409	2	1	78.27	143237	1.24879	1.7819	DHX9	DHX9|HGNC Symbol|DEAH (Asp-Glu-Ala-His) box helicase 9 [Source:HGNC Symbol;Acc:2750]|16|ENSBTAG00000019821|ENSBTAT00000026409	47848.1	59752.3	29949.7	53367.5
ENSBTAP00000007758;ENSBTAP00000029915	4	4	108.38	47911	1.24848	1.09674	RBBP4	RBBP4|UniProtKB Gene Name|Bos taurus retinoblastoma binding protein 4 (RBBP4), mRNA. [Source:RefSeq mRNA;Acc:NM_001077013]|2|ENSBTAG00000005904|ENSBTAT00000007758	195830	244490	108370	118854
ENSBTAP00000033048	1	1	33.85	27153	1.24688	1.35127	SRSF7	SRSF7|UniProtKB Gene Name|Bos taurus serine/arginine-rich splicing factor 7 (SRSF7), mRNA. [Source:RefSeq mRNA;Acc:NM_001034277]|11|ENSBTAG00000014891|ENSBTAT00000033124	345239	430471	322236	435428
ENSBTAP00000023199	1	1	51.9	112202	1.24631	1.29583	STK10	STK10|UniProtKB Gene Name|Bos taurus serine/threonine kinase 10 (STK10), mRNA. [Source:RefSeq mRNA;Acc:NM_001192627]|20|ENSBTAG00000017457|ENSBTAT00000023199	28146.6	35079.4	33483.4	43388.6
ENSBTAP00000006106	4	2	190.34	12528	1.24454	1.02456	NME1	NME1|EntrezGene|Bos taurus non-metastatic cells 1, protein (NM23A) expressed in (NME1), transcript variant 2, mRNA. [Source:RefSeq mRNA;Acc:NM_205777]|19|ENSBTAG00000004651|ENSBTAT00000006106	773018	962049	647702	663610
ENSBTAP00000017629	3	3	147.1	124202	1.24356	1.53286	XPO1	XPO1|HGNC Symbol|exportin 1 (CRM1 homolog, yeast) [Source:HGNC Symbol;Acc:12825]|11|ENSBTAG00000013254|ENSBTAT00000017629	184085	228920	136595	209381
ENSBTAP00000027072	3	3	100.84	75442	1.24264	1.52718	FNBP1	FNBP1|EntrezGene|Bos taurus formin binding protein 1 (FNBP1), mRNA. [Source:RefSeq mRNA;Acc:NM_001206712]|11|ENSBTAG00000020313|ENSBTAT00000027072	176088	218813	111426	170167
ENSBTAP00000012551	6	6	268.27	47004	1.24088	0.990879	SUCLG2	SUCLG2|UniProtKB Gene Name|Bos taurus succinate-CoA ligase, GDP-forming, beta subunit (SUCLG2), mRNA. [Source:RefSeq mRNA;Acc:NM_001034639]|22|ENSBTAG00000009541|ENSBTAT00000012551	433704	538174	602165	596672
ENSBTAP00000018473	6	6	344.52	55270	1.24059	1.08056	TXNRD1	TXNRD1|UniProtKB Gene Name|Bos taurus thioredoxin reductase 1 (TXNRD1), mRNA. [Source:RefSeq mRNA;Acc:NM_174625]|5|ENSBTAG00000013912|ENSBTAT00000018473	811881	1.00721e+06	704041	760760
ENSBTAP00000014176	2	2	104.25	69593	1.23974	0.699948	DLAT	||Bos taurus dihydrolipoamide S-acetyltransferase (DLAT), mRNA. [Source:RefSeq mRNA;Acc:NM_001205730]|15|ENSBTAG00000010709|ENSBTAT00000014176	45163.6	55990.9	112788	78945.6
ENSBTAP00000002578	1	1	53.31	69254	1.23754	2.66265	HSPC321	HSPC321|UniProtKB Gene Name|Bos taurus SWAP switching B-cell complex 70kDa subunit (SWAP70), mRNA. [Source:RefSeq mRNA;Acc:NM_001080297]|15|ENSBTAG00000001987|ENSBTAT00000002578	13341.8	16511	12268.8	32667.6
ENSBTAP00000022314	2	2	81.25	27799	1.23326	1.25977	PGLS	PGLS|EntrezGene|Bos taurus 6-phosphogluconolactonase (PGLS), mRNA. [Source:RefSeq mRNA;Acc:NM_001038580]|7|ENSBTAG00000016783|ENSBTAT00000022314	130940	161483	95559.5	120383
ENSBTAP00000028908	1	1	14.46	74430	1.23231	1.59014	TBR1	TBR1|EntrezGene|Bos taurus T-box, brain, 1 (TBR1), mRNA. [Source:RefSeq mRNA;Acc:NM_001192049]|2|ENSBTAG00000021692|ENSBTAT00000028908	17210.8	21209.1	23706.6	37696.9
ENSBTAP00000006033	3	1	176.56	22641	1.22932	0.89991	TAGLN3	TAGLN3|UniProtKB Gene Name|Bos taurus transgelin 3 (TAGLN3), mRNA. [Source:RefSeq mRNA;Acc:NM_001034499]|1|ENSBTAG00000004599|ENSBTAT00000006033	156209	192031	221205	199064
ENSBTAP00000026183	4	4	146.72	35511	1.22791	1.76303	GNB2L1	GNB2L1|UniProtKB Gene Name|Guanine nucleotide-binding protein subunit beta-2-like 1 [Source:UniProtKB/Swiss-Prot;Acc:P63243]|7|ENSBTAG00000019648|ENSBTAT00000026183	401476	492976	203956	359582
ENSBTAP00000016718	3	3	108.57	14321	1.22709	1.44378	HRSP12	HRSP12|UniProtKB Gene Name|Bos taurus heat-responsive protein 12 (HRSP12), mRNA. [Source:RefSeq mRNA;Acc:NM_001034208]|14|ENSBTAG00000012595|ENSBTAT00000016718	723771	888135	263570	380536
ENSBTAP00000052105	1	1	30.4	17212	1.22695	3.05609	RPS13	RPS13|UniProtKB Gene Name|Bos taurus ribosomal protein S13 (RPS13), mRNA. [Source:RefSeq mRNA;Acc:NM_001025342]|15|ENSBTAG00000040308|ENSBTAT00000055693	122075	149780	13426.1	41031.5
ENSBTAP00000055370;ENSBTAP00000056626	2	2	95.3	33084	1.22545	0.600003	SLC25A6	SLC25A6|UniProtKB Gene Name|Bos taurus solute carrier family 25 (mitochondrial carrier; adenine nucleotide translocator), member 6 (SLC25A6), mRNA. [Source:RefSeq mRNA;Acc:NM_174660]|GJ060129.1|ENSBTAG00000047418|ENSBTAT00000063682	94774.9	116141	172341	103405
ENSBTAP00000006236	1	1	34.9	34351	1.22392	0.997516	MS4A1	MS4A1|EntrezGene|Bos taurus membrane-spanning 4-domains, subfamily A, member 1 (MS4A1), mRNA. [Source:RefSeq mRNA;Acc:NM_001077854]|15|ENSBTAG00000004580|ENSBTAT00000006236	62504.3	76500.1	62488.4	62333.2
ENSBTAP00000017696	4	4	116.83	42287	1.21927	1.4307	RBMX	RBMX|UniProtKB Gene Name|Bos taurus RNA binding motif protein, X-linked (RBMX), mRNA. [Source:RefSeq mRNA;Acc:NM_001172039]|X|ENSBTAG00000013308|ENSBTAT00000017696	449541	548110	261392	373974
ENSBTAP00000012866	6	5	347.82	32977	1.21919	1.58614	RPSA	RPSA|UniProtKB Gene Name|Bos taurus ribosomal protein SA (RPSA), mRNA. [Source:RefSeq mRNA;Acc:NM_174379]|22|ENSBTAG00000009757|ENSBTAT00000012866	946719	1.15423e+06	571287	906139
ENSBTAP00000013082	4	3	181.46	36427	1.21699	0.969229	AKR1B1	AKR1B1|UniProtKB Gene Name|Bos taurus aldo-keto reductase family 1, member B1 (aldose reductase) (AKR1B1), mRNA. [Source:RefSeq mRNA;Acc:NM_001012519]|4|ENSBTAG00000009902|ENSBTAT00000013082	194089	236204	331627	321422
ENSBTAP00000048516	2	2	71.37	31804	1.21678	1.17966	PITPNB	PITPNB|UniProtKB Gene Name|Bos taurus phosphatidylinositol transfer protein, beta (PITPNB), mRNA. [Source:RefSeq mRNA;Acc:NM_001078040]|17|ENSBTAG00000017799|ENSBTAT00000051852	198985	242122	115963	136796
ENSBTAP00000000841	2	2	88.66	19810	1.21578	1.28795	APRT	APRT|UniProtKB Gene Name|Bos taurus adenine phosphoribosyltransferase (APRT), mRNA. [Source:RefSeq mRNA;Acc:NM_001025334]|18|ENSBTAG00000000639|ENSBTAT00000000841	301101	366072	228775	294652
ENSBTAP00000052296	2	2	40.36	17184	1.21466	1.28131	UBE2N	UBE2N|UniProtKB Gene Name|Bos taurus ubiquitin-conjugating enzyme E2N (UBE2N), mRNA. [Source:RefSeq mRNA;Acc:NM_001076258]|5|ENSBTAG00000021767|ENSBTAT00000052393	148131	179928	126267	161787
ENSBTAP00000016954	8	8	289.11	59656	1.21426	0.922608	CCT7	CCT7|UniProtKB Gene Name|Bos taurus chaperonin containing TCP1, subunit 7 (eta) (CCT7), mRNA. [Source:RefSeq mRNA;Acc:NM_001046171]|11|ENSBTAG00000012756|ENSBTAT00000016954	4.95275e+07	6.01394e+07	5.75837e+07	5.31272e+07
ENSBTAP00000013320	7	7	328.46	144712	1.21039	0.869288	PTPRC	PTPRC|HGNC Symbol|protein tyrosine phosphatase, receptor type, C [Source:HGNC Symbol;Acc:9666]|16|ENSBTAG00000023144|ENSBTAT00000013320	588027	711741	610976	531114
ENSBTAP00000014038	3	3	93.07	19402	1.21026	1.00561	PPP3R1	PPP3R1|UniProtKB Gene Name|Bos taurus protein phosphatase 3, regulatory subunit B, alpha (PPP3R1), mRNA. [Source:RefSeq mRNA;Acc:NM_174583]|11|ENSBTAG00000010619|ENSBTAT00000014038	169742	205432	188394	189452
ENSBTAP00000035184	2	2	84.88	18817	1.20825	0.945534	SKP1	SKP1|UniProtKB Gene Name|Bos taurus S-phase kinase-associated protein 1 (SKP1), mRNA. [Source:RefSeq mRNA;Acc:NM_001034781]|7|ENSBTAG00000025191|ENSBTAT00000035306	287512	347386	283301	267870
ENSBTAP00000014162	2	2	164.44	23356	1.2082	1.51374	NACA	NACA|UniProtKB Gene Name|Bos taurus nascent polypeptide-associated complex alpha subunit (NACA), mRNA. [Source:RefSeq mRNA;Acc:NM_001014916]|5|ENSBTAG00000010701|ENSBTAT00000014162	266875	322439	169140	256033
ENSBTAP00000020080	4	4	216.24	15076	1.20745	1.43969	LGALS1	LGALS1|UniProtKB Gene Name|Bos taurus lectin, galactoside-binding, soluble, 1 (LGALS1), mRNA. [Source:RefSeq mRNA;Acc:NM_175782]|5|ENSBTAG00000015089|ENSBTAT00000020080	2.13828e+06	2.58185e+06	775020	1.11579e+06
ENSBTAP00000024457	1	1	40.77	49946	1.20393	1.24429	CRLF3	CRLF3|EntrezGene|Bos taurus cytokine receptor-like factor 3 (CRLF3), mRNA. [Source:RefSeq mRNA;Acc:NM_001192650]|19|ENSBTAG00000018381|ENSBTAT00000024457	65117.3	78396.3	52071	64791.7
ENSBTAP00000020326	3	3	95.51	24344	1.20331	2.37128	RPS8	RPS8|UniProtKB Gene Name|Bos taurus ribosomal protein S8 (RPS8), mRNA. [Source:RefSeq mRNA;Acc:NM_001025317]|3|ENSBTAG00000015285|ENSBTAT00000020326	242581	291900	92296.1	218860
ENSBTAP00000021643	1	1	23.83	9776	1.2029	0	SNRPF	SNRPF|UniProtKB Gene Name|Bos taurus small nuclear ribonucleoprotein polypeptide F (SNRPF), mRNA. [Source:RefSeq mRNA;Acc:NM_001195027]|5|ENSBTAG00000016271|ENSBTAT00000021643	47663.8	57334.8	0	0
ENSBTAP00000009128	1	1	34.23	46541	1.2021	0.726058	COPS4	COPS4|UniProtKB Gene Name|Bos taurus COP9 constitutive photomorphogenic homolog subunit 4 (Arabidopsis) (COPS4), mRNA. [Source:RefSeq mRNA;Acc:NM_001034694]|6|ENSBTAG00000006950|ENSBTAT00000009128	37365.4	44917	41924.8	30439.8
ENSBTAP00000028757;ENSBTAP00000055925	2	2	103.32	39854	1.20009	1.97853	HNRNPA1	|||2|ENSBTAG00000021580|ENSBTAT00000028757	113455	136156	38602.8	76377
ENSBTAP00000016242;ENSBTAP00000001948;ENSBTAP00000038183;ENSBTAP00000001950;ENSBTAP00000038184;ENSBTAP00000041398	33	5	1883.31	50804	1.19968	0.943703	TUBA1B	TUBA1B|EntrezGene|Bos taurus tubulin, alpha 1b (TUBA1B), mRNA. [Source:RefSeq mRNA;Acc:NM_001114856]|5|ENSBTAG00000012244|ENSBTAT00000016242	9.95351e+06	1.1941e+07	1.61859e+07	1.52747e+07
ENSBTAP00000019184	1	1	43.98	14807	1.19864	1.27477	RPL22	||Uncharacterized protein [Source:UniProtKB/TrEMBL;Acc:F1N301]|16|ENSBTAG00000014423|ENSBTAT00000019184	115311	138216	77295.1	98533.4
ENSBTAP00000020452	4	4	179.46	21636	1.19822	2.25597	RPL18	RPL18|UniProtKB Gene Name|Bos taurus ribosomal protein L18 (RPL18), mRNA. [Source:RefSeq mRNA;Acc:NM_001015556]|18|ENSBTAG00000015388|ENSBTAT00000020452	450254	539502	195862	441859
ENSBTAP00000007405	1	1	91.92	10942	1.19782	1.23907	LSM2	LSM2|UniProtKB Gene Name|Bos taurus LSM2 homolog, U6 small nuclear RNA associated (S. cerevisiae) (LSM2), mRNA. [Source:RefSeq mRNA;Acc:NM_001101177]|23|ENSBTAG00000005634|ENSBTAT00000007405	149569	179157	109870	136137
ENSBTAP00000019656	3	3	119.69	24015	1.19756	1.7147	GUK1	GUK1|UniProtKB Gene Name|Bos taurus guanylate kinase 1 (GUK1), transcript variant 1, mRNA. [Source:RefSeq mRNA;Acc:NM_001159412]|7|ENSBTAG00000014775|ENSBTAT00000019656	202619	242648	127868	219255
ENSBTAP00000025179	1	1	63.51	56127	1.19398	1.50158	IMPDH2	IMPDH2|UniProtKB Gene Name|Bos taurus IMP (inosine 5'-monophosphate) dehydrogenase 2 (IMPDH2), mRNA. [Source:RefSeq mRNA;Acc:NM_001034416]|22|ENSBTAG00000031837|ENSBTAT00000025179	28997.9	34622.9	30584.5	45924.9
ENSBTAP00000054193	6	5	290.74	16335	1.19346	1.2701	ARPC5	ARPC5|HGNC Symbol|actin related protein 2/3 complex, subunit 5, 16kDa [Source:HGNC Symbol;Acc:708]|16|ENSBTAG00000045582|ENSBTAT00000064442	1.00611e+06	1.20075e+06	507813	644975
ENSBTAP00000004480	1	1	27.27	56244	1.19339	0.989773	ATP6V1H	ATP6V1H|HGNC Symbol|ATPase, H+ transporting, lysosomal 50/57kDa, V1 subunit H [Source:HGNC Symbol;Acc:18303]|14|ENSBTAG00000003450|ENSBTAT00000004480	62405.3	74474	90725.9	89798
ENSBTAP00000004537	1	1	28.04	29155	1.19333	1.53966	ELMO1	ELMO1|UniProtKB Gene Name|Bos taurus engulfment and cell motility 1 (ELMO1), transcript variant 2, mRNA. [Source:RefSeq mRNA;Acc:NM_001024505]|4|ENSBTAG00000003490|ENSBTAT00000004537	51110.2	60991.3	41005.2	63133.9
ENSBTAP00000017232	8	8	373.98	59081	1.1929	1.93278	SARS	SARS|UniProtKB Gene Name|Bos taurus seryl-tRNA synthetase (SARS), mRNA. [Source:RefSeq mRNA;Acc:NM_174175]|3|ENSBTAG00000012962|ENSBTAT00000017232	775057	924569	406710	786081
ENSBTAP00000033820	1	1	27.2	112551	1.19105	1.66891	ARHGEF2	ARHGEF2|UniProtKB Gene Name|Bos taurus Rho/Rac guanine nucleotide exchange factor (GEF) 2 (ARHGEF2), mRNA. [Source:RefSeq mRNA;Acc:NM_001098881]|3|ENSBTAG00000000113|ENSBTAT00000033917	12013.6	14308.9	14630	24416.2
ENSBTAP00000012357;ENSBTAP00000009864	4	2	155.85	51503	1.18877	1.31267	HNRNPH1	HNRNPH1|HGNC Symbol|heterogeneous nuclear ribonucleoprotein H1 (H) [Source:HGNC Symbol;Acc:5041]|7|ENSBTAG00000009389|ENSBTAT00000012357	214709	255240	141629	185912
ENSBTAP00000054069	2	2	44.19	14627	1.18794	1.47302	RANGAP1	||Ran-specific GTPase-activating protein [Source:UniProtKB/TrEMBL;Acc:G3MX11]|17|ENSBTAG00000046005|ENSBTAT00000063988	353444	419869	249754	367891
ENSBTAP00000003732	3	3	139.97	38492	1.18775	1.75009	DCPS	DCPS|UniProtKB Gene Name|Bos taurus decapping enzyme, scavenger (DCPS), mRNA. [Source:RefSeq mRNA;Acc:NM_174695]|29|ENSBTAG00000002879|ENSBTAT00000003732	124993	148460	68151.4	119271
ENSBTAP00000019767	2	1	70.61	81241	1.18738	1.76328	COPB2	COPB2|EntrezGene|Bos taurus coatomer protein complex, subunit beta 2 (beta prime) (COPB2), mRNA. [Source:RefSeq mRNA;Acc:NM_174281]|1|ENSBTAG00000014843|ENSBTAT00000019767	48665.3	57784.2	28434.3	50137.6
ENSBTAP00000028330	2	2	138.42	14021	1.18715	1.28508	SNRPD3	SNRPD3|EntrezGene|Bos taurus small nuclear ribonucleoprotein D3 polypeptide 18kDa (SNRPD3), mRNA. [Source:RefSeq mRNA;Acc:NM_001076479]|17|ENSBTAG00000021262|ENSBTAT00000028330	182879	217104	97335.2	125083
ENSBTAP00000012108	4	4	122.85	109321	1.18606	1.05823	GART	GART|UniProtKB Gene Name|Bos taurus phosphoribosylglycinamide formyltransferase, phosphoribosylglycinamide synthetase, phosphoribosylaminoimidazole synthetase (GART), mRNA. [Source:RefSeq mRNA;Acc:NM_001040473]|1|ENSBTAG00000009188|ENSBTAT0000001210	146653	173939	156286	165387
ENSBTAP00000013796	4	4	119.88	44174	1.18527	1.21378	PA2G4	PA2G4|UniProtKB Gene Name|Bos taurus proliferation-associated 2G4, 38kDa (PA2G4), mRNA. [Source:RefSeq mRNA;Acc:NM_001034699]|5|ENSBTAG00000010451|ENSBTAT00000013796	393139	465976	275398	334273
ENSBTAP00000002019;ENSBTAP00000016856	3	3	136.51	42225	1.18426	2.27633	OAS1Z	OAS1Z|EntrezGene|Bos taurus 2',5'-oligoadenylate synthetase 1, 40/46kDa (OAS1Z), mRNA. [Source:RefSeq mRNA;Acc:NM_001029846]|17|ENSBTAG00000037527|ENSBTAT00000002019	356921	422687	24143.4	54958.3
ENSBTAP00000001190	2	1	67.24	178905	1.18369	0.970915	IQGAP2	IQGAP2|HGNC Symbol|IQ motif containing GTPase activating protein 2 [Source:HGNC Symbol;Acc:6111]|10|ENSBTAG00000000897|ENSBTAT00000001190	30109	35639.7	34412.7	33411.8
ENSBTAP00000011382	12	12	469.27	51631	1.18249	1.01645	CORO1A	CORO1A|UniProtKB Gene Name|Bos taurus coronin, actin binding protein, 1A (CORO1A), mRNA. [Source:RefSeq mRNA;Acc:NM_174521]|25|ENSBTAG00000008631|ENSBTAT00000011382	6.57571e+06	7.77571e+06	5.06664e+06	5.15001e+06
ENSBTAP00000024553	3	2	118.4	239868	1.17973	1.79761	NUMA1	NUMA1|HGNC Symbol|nuclear mitotic apparatus protein 1 [Source:HGNC Symbol;Acc:8059]|15|ENSBTAG00000018449|ENSBTAT00000024553	64529.3	76127.4	41008.6	73717.4
ENSBTAP00000014593	2	2	45.11	37954	1.17972	1.32589	CTSH	CTSH|UniProtKB Gene Name|Bos taurus cathepsin H (CTSH), mRNA. [Source:RefSeq mRNA;Acc:NM_001034385]|21|ENSBTAG00000010992|ENSBTAT00000014593	78116.5	92155.4	28127.9	37294.6
ENSBTAP00000056437;ENSBTAP00000054055;ENSBTAP00000025305	8	8	222.67	35986	1.17856	1.6956	KCTD12	KCTD12|HGNC Symbol|potassium channel tetramerization domain containing 12 [Source:HGNC Symbol;Acc:14678]|12|ENSBTAG00000001414|ENSBTAT00000001854	865848	1.02046e+06	245592	416425
ENSBTAP00000027964	2	2	73.23	50464	1.17634	1.23025	RUVBL1	RUVBL1|UniProtKB Gene Name|Bos taurus RuvB-like 1 (E. coli) (RUVBL1), mRNA. [Source:RefSeq mRNA;Acc:NM_001101076]|22|ENSBTAG00000020998|ENSBTAT00000027964	95764.5	112652	75731.2	93168.6
ENSBTAP00000000144	12	6	640.68	46353	1.17568	2.33999	EIF4A1	EIF4A1|UniProtKB Gene Name|Bos taurus eukaryotic translation initiation factor 4A1 (EIF4A1), mRNA. [Source:RefSeq mRNA;Acc:NM_001034228]|19|ENSBTAG00000000132|ENSBTAT00000000144	583761	686319	215420	504080
ENSBTAP00000014154	5	5	244.48	102610	1.17478	1.43039	SND1	SND1|UniProtKB Gene Name|Bos taurus staphylococcal nuclease and tudor domain containing 1 (SND1), mRNA. [Source:RefSeq mRNA;Acc:NM_205784]|4|ENSBTAG00000010692|ENSBTAT00000014154	420217	493663	309298	442418
ENSBTAP00000019318;ENSBTAP00000028899;ENSBTAP00000050667;ENSBTAP00000055412;ENSBTAP00000017825;ENSBTAP00000040983;ENSBTAP00000056062	10	10	497.35	50451	1.17434	1.10945	EEF1A1	EEF1A1|UniProtKB Gene Name|Elongation factor 1-alpha 1 [Source:UniProtKB/Swiss-Prot;Acc:P68103]|9|ENSBTAG00000014534|ENSBTAT00000019318	4.95195e+06	5.81528e+06	4.23178e+06	4.69496e+06
ENSBTAP00000025807	2	2	49.09	23962	1.17072	1.24133	RAB21	RAB21|EntrezGene|Bos taurus RAB21, member RAS oncogene family (RAB21), mRNA. [Source:RefSeq mRNA;Acc:NM_001075317]|X|ENSBTAG00000019370|ENSBTAT00000025807	67812.4	79389.7	86963.8	107951
ENSBTAP00000017860	1	1	24.08	16879	1.16839	0.906054	GLRX5	GLRX5|UniProtKB Gene Name|Bos taurus glutaredoxin 5 (GLRX5), mRNA. [Source:RefSeq mRNA;Acc:NM_001100303]|21|ENSBTAG00000013423|ENSBTAT00000017860	59566.2	69596.5	51347.9	46523.9
ENSBTAP00000009073	8	8	335.07	32372	1.16659	1.61787	ASRGL1	ASRGL1|UniProtKB Gene Name|Bos taurus asparaginase like 1 (ASRGL1), mRNA. [Source:RefSeq mRNA;Acc:NM_001077035]|29|ENSBTAG00000006910|ENSBTAT00000009073	4.09441e+06	4.77652e+06	877057	1.41896e+06
ENSBTAP00000017306	2	2	68.64	92752	1.16627	0.916238	AMPD2	AMPD2|HGNC Symbol|adenosine monophosphate deaminase 2 [Source:HGNC Symbol;Acc:469]|3|ENSBTAG00000013018|ENSBTAT00000017306	105071	122542	199131	182451
ENSBTAP00000019064;ENSBTAP00000054001	2	2	110.01	51603	1.16597	1.26786	EIF2S3	EIF2S3|UniProtKB Gene Name|Bos taurus eukaryotic translation initiation factor 2, subunit 3 gamma, 52kDa (EIF2S3), mRNA. [Source:RefSeq mRNA;Acc:NM_001046117]|X|ENSBTAG00000014337|ENSBTAT00000019064	146695	171043	100165	126995
ENSBTAP00000025963;ENSBTAP00000038825	3	3	82.45	24987	1.16537	1.70602	RPL10A	RPL10A|UniProtKB Gene Name|Bos taurus ribosomal protein L10a (RPL10A), mRNA. [Source:RefSeq mRNA;Acc:NM_001015647]|23|ENSBTAG00000019494|ENSBTAT00000025963	483368	563304	312035	532337
ENSBTAP00000016712	3	3	126.93	10925	1.16487	0.964269	HSPE1	HSPE1|UniProtKB Gene Name|Bos taurus heat shock 10kDa protein 1 (chaperonin 10) (HSPE1), mRNA. [Source:RefSeq mRNA;Acc:NM_174346]|2|ENSBTAG00000012589|ENSBTAT00000016712	419462	488618	428692	413375
ENSBTAP00000052124	7	7	336.83	70430	1.16365	0.827073	XPNPEP1	XPNPEP1|UniProtKB Gene Name|Bos taurus X-prolyl aminopeptidase (aminopeptidase P) 1, soluble (XPNPEP1), mRNA. [Source:RefSeq mRNA;Acc:NM_001075602]|26|ENSBTAG00000004438|ENSBTAT00000057101	544447	633544	766276	633767
ENSBTAP00000011029;ENSBTAP00000056154	5	5	295	84455	1.16088	1.23412	CAST	CAST|UniProtKB Gene Name|Bos taurus calpastatin (CAST), transcript variant 1, mRNA. [Source:RefSeq mRNA;Acc:NM_001030318]|7|ENSBTAG00000000874|ENSBTAT00000011029	710025	824256	630106	777626
ENSBTAP00000028809	1	1	29.44	24330	1.15873	0.876586	MGC159500	MGC159500|UniProtKB Gene Name|Bos taurus PITH (C-terminal proteasome-interacting domain of thioredoxin-like) domain containing 1 (PITHD1), mRNA. [Source:RefSeq mRNA;Acc:NM_001098890]|2|ENSBTAG00000021620|ENSBTAT00000028809	30593.5	35449.6	21966.3	19255.4
ENSBTAP00000000630	3	3	154.64	36879	1.15777	1.18444	AKR1A1	AKR1A1|UniProtKB Gene Name|Bos taurus aldo-keto reductase family 1, member A1 (aldehyde reductase) (AKR1A1), mRNA. [Source:RefSeq mRNA;Acc:NM_001076513]|3|ENSBTAG00000000497|ENSBTAT00000000630	790270	914955	469529	556127
ENSBTAP00000008424	1	1	22.35	88329	1.15603	1.64553	TRIM28	TRIM28|HGNC Symbol|tripartite motif containing 28 [Source:HGNC Symbol;Acc:16384]|18|ENSBTAG00000006422|ENSBTAT00000008424	22010.2	25444.4	16925.5	27851.4
ENSBTAP00000016495	2	2	114.71	75318	1.15504	1.14705	SH3BP1	SH3BP1|HGNC Symbol|SH3-domain binding protein 1 [Source:HGNC Symbol;Acc:10824]|5|ENSBTAG00000030257|ENSBTAT00000016495	47537	54907.2	48352.2	55462.5
ENSBTAP00000029304	5	4	342.78	24960	1.15305	1.05646	EEF1B	EEF1B|UniProtKB Gene Name|Bos taurus eukaryotic translation elongation factor 1 beta 2 (EEF1B2), mRNA. [Source:RefSeq mRNA;Acc:NM_001014936]|2|ENSBTAG00000021979|ENSBTAT00000029304	927655	1.06963e+06	847269	895106
ENSBTAP00000022378;ENSBTAP00000002051	6	6	220.74	23786	1.15204	0.904363	PPIB	PPIB|UniProtKB Gene Name|Bos taurus peptidylprolyl isomerase B (cyclophilin B) (PPIB), mRNA. [Source:RefSeq mRNA;Acc:NM_174152]|10|ENSBTAG00000016822|ENSBTAT00000022378	1.12707e+06	1.29843e+06	1.54911e+06	1.40096e+06
ENSBTAP00000007135	1	1	47.39	49325	1.14991	1.2482	PSMC1	PSMC1|UniProtKB Gene Name|Bos taurus proteasome (prosome, macropain) 26S subunit, ATPase, 1 (PSMC1), mRNA. [Source:RefSeq mRNA;Acc:NM_001014855]|10|ENSBTAG00000005426|ENSBTAT00000007135	60564	69643	57192.8	71387.9
ENSBTAP00000019872	1	1	17.53	58176	1.14979	2.74531	OXSR1	OXSR1|HGNC Symbol|oxidative stress responsive 1 [Source:HGNC Symbol;Acc:8508]|22|ENSBTAG00000014927|ENSBTAT00000019872	8279.78	9520.05	2655.54	7290.28
ENSBTAP00000047423	3	3	179.34	76316	1.14863	0.669234	GBE1	GBE1|EntrezGene|Bos taurus glucan (1,4-alpha-), branching enzyme 1 (GBE1), mRNA. [Source:RefSeq mRNA;Acc:NM_001122729]|1|ENSBTAG00000036262|ENSBTAT00000050765	133661	153527	161503	108084
ENSBTAP00000008358;ENSBTAP00000045321	13	13	522.79	61118	1.14821	1.16887	CCT3	CCT3|UniProtKB Gene Name|Bos taurus chaperonin containing TCP1, subunit 3 (gamma) (CCT3), mRNA. [Source:RefSeq mRNA;Acc:NM_001017934]|3|ENSBTAG00000006370|ENSBTAT00000008358	1.32476e+06	1.52111e+06	1.23168e+06	1.43967e+06
ENSBTAP00000028520	10	10	439.77	28846	1.14753	1.16208	PSME1	PSME1|UniProtKB Gene Name|Bos taurus proteasome (prosome, macropain) activator subunit 1 (PA28 alpha) (PSME1), mRNA. [Source:RefSeq mRNA;Acc:NM_001024509]|10|ENSBTAG00000021395|ENSBTAT00000028520	2.72178e+06	3.12333e+06	1.95352e+06	2.27015e+06
ENSBTAP00000015339	1	1	40.68	51540	1.14669	1.09366	GDA	GDA|EntrezGene|Bos taurus guanine deaminase (GDA), mRNA. [Source:RefSeq mRNA;Acc:NM_001192620]|8|ENSBTAG00000011545|ENSBTAT00000015339	33066.8	37917.3	5617.88	6144.02
ENSBTAP00000025989	2	2	141.24	18921	1.14541	0.927289	NUDT5	NUDT5|HGNC Symbol|nudix (nucleoside diphosphate linked moiety X)-type motif 5 [Source:HGNC Symbol;Acc:8052]|13|ENSBTAG00000019509|ENSBTAT00000025989	234089	268128	196484	182197
ENSBTAP00000025496	16	16	946.26	57781	1.14505	1.19828	CCT2	CCT2|UniProtKB Gene Name|Bos taurus chaperonin containing TCP1, subunit 2 (beta) (CCT2), mRNA. [Source:RefSeq mRNA;Acc:NM_001034239]|5|ENSBTAG00000019156|ENSBTAT00000025496	2.22392e+06	2.54649e+06	2.08388e+06	2.49708e+06
ENSBTAP00000019499	5	4	283.01	31237	1.14481	1.15501	EEF1D	EEF1D|UniProtKB Gene Name|Elongation factor 1-delta [Source:UniProtKB/Swiss-Prot;Acc:A5D989]|14|ENSBTAG00000014643|ENSBTAT00000019499	474960	543739	353053	407781
ENSBTAP00000015358	3	3	218.01	30178	1.14458	2.09651	RPL7A	RPL7A|UniProtKB Gene Name|Bos taurus ribosomal protein L7a (RPL7A), mRNA. [Source:RefSeq mRNA;Acc:NM_001040520]|11|ENSBTAG00000011559|ENSBTAT00000015358	352623	403605	166424	348909
ENSBTAP00000009699	2	2	123.41	12563	1.14438	0.933463	MIF	MIF|UniProtKB Gene Name|Bos taurus macrophage migration inhibitory factor (glycosylation-inhibiting factor) (MIF), mRNA. [Source:RefSeq mRNA;Acc:NM_001033608]|17|ENSBTAG00000007375|ENSBTAT00000009699	228924	261976	171105	159720
ENSBTAP00000047104	1	1	32.69	73482	1.1438	3.15307	DDX3X	DDX3X|HGNC Symbol|DEAD (Asp-Glu-Ala-Asp) box helicase 3, X-linked [Source:HGNC Symbol;Acc:2745]|X|ENSBTAG00000035907|ENSBTAT00000050399	12840	14686.4	5029.58	15858.6
ENSBTAP00000008467	1	1	43.22	9136	1.14151	0.678418	AHSP	AHSP|HGNC Symbol|alpha hemoglobin stabilizing protein [Source:HGNC Symbol;Acc:18075]|25|ENSBTAG00000006457|ENSBTAT00000008467	75510.1	86195.9	111533	75666.1
ENSBTAP00000009044	4	3	130.09	68834	1.14142	1.00467	EIF4B	EIF4B|HGNC Symbol|eukaryotic translation initiation factor 4B [Source:HGNC Symbol;Acc:3285]|5|ENSBTAG00000006883|ENSBTAT00000009044	183199	209107	134707	135336
ENSBTAP00000048368	6	6	237.88	78244	1.14139	1.52191	HNRNPU	HNRNPU|UniProtKB Gene Name|Bos taurus heterogeneous nuclear ribonucleoprotein U (scaffold attachment factor A) (HNRNPU), mRNA. [Source:RefSeq mRNA;Acc:NM_001076920]|16|ENSBTAG00000007606|ENSBTAT00000052059	520387	593965	320049	487085
ENSBTAP00000022375	2	2	146.69	14827	1.14099	1.2065	FABP3	FABP3|UniProtKB Gene Name|Bos taurus fatty acid binding protein 3, muscle and heart (mammary-derived growth inhibitor) (FABP3), mRNA. [Source:RefSeq mRNA;Acc:NM_174313]|2|ENSBTAG00000016819|ENSBTAT00000022375	304912	347900	199613	240833
ENSBTAP00000044263	1	1	54.01	57651	1.14074	1.17978	BIN2	BIN2|UniProtKB Gene Name|Bos taurus bridging integrator 2 (BIN2), mRNA. [Source:RefSeq mRNA;Acc:NM_001083435]|5|ENSBTAG00000008897|ENSBTAT00000047025	87166.1	99433.5	41015.2	48389
ENSBTAP00000005553;ENSBTAP00000048213	6	6	338.01	42926	1.13924	1.36936	TMPO	TMPO|HGNC Symbol|thymopoietin [Source:HGNC Symbol;Acc:11875]|5|ENSBTAG00000004240|ENSBTAT00000005553	1.29743e+06	1.47809e+06	905563	1.24005e+06
ENSBTAP00000004892	13	13	969.16	68439	1.13829	1.08827	TKT	TKT|UniProtKB Gene Name|Bos taurus transketolase (TKT), mRNA. [Source:RefSeq mRNA;Acc:NM_001003906]|22|ENSBTAG00000003758|ENSBTAT00000004892	9.94301e+06	1.1318e+07	5.7153e+06	6.21978e+06
ENSBTAP00000024515	1	1	14.82	36788	1.13828	1.55883	PSMD7	PSMD7|UniProtKB Gene Name|Bos taurus proteasome (prosome, macropain) 26S subunit, non-ATPase, 7 (PSMD7), mRNA. [Source:RefSeq mRNA;Acc:NM_001034423]|18|ENSBTAG00000018425|ENSBTAT00000024515	119130	135604	99133.3	154532
ENSBTAP00000007642	5	5	335.09	27533	1.13688	1.17285	PSME2	PSME2|UniProtKB Gene Name|Bos taurus proteasome (prosome, macropain) activator subunit 2 (PA28 beta) (PSME2), mRNA. [Source:RefSeq mRNA;Acc:NM_001014889]|10|ENSBTAG00000005814|ENSBTAT00000007642	1.328e+06	1.50978e+06	941959	1.10478e+06
ENSBTAP00000046374	3	3	84.12	27842	1.13672	1.12523	SRSF1	SRSF1|UniProtKB Gene Name|Bos taurus serine/arginine-rich splicing factor 1 (SRSF1), mRNA. [Source:RefSeq mRNA;Acc:NM_001076394]|19|ENSBTAG00000014766|ENSBTAT00000049486	266552	302995	255530	287530
ENSBTAP00000008580	5	5	280.17	40629	1.1353	1.08841	NSFL1C	NSFL1C|UniProtKB Gene Name|Bos taurus NSFL1 (p97) cofactor (p47) (NSFL1C), mRNA. [Source:RefSeq mRNA;Acc:NM_001034557]|13|ENSBTAG00000006533|ENSBTAT00000008580	365745	415231	305707	332735
ENSBTAP00000027212	1	1	38.51	19145	1.13512	0.833132	AP1S2	AP1S2|UniProtKB Gene Name|Bos taurus adaptor-related protein complex 1, sigma 2 subunit (AP1S2), mRNA. [Source:RefSeq mRNA;Acc:NM_001040591]|X|ENSBTAG00000020420|ENSBTAT00000027212	68273.5	77498.9	76994.9	64146.9
ENSBTAP00000013018	2	2	71.65	23262	1.13512	0.799864	RAB18	RAB18|UniProtKB Gene Name|Bos taurus RAB18, member RAS oncogene family (RAB18), mRNA. [Source:RefSeq mRNA;Acc:NM_001075499]|13|ENSBTAG00000009871|ENSBTAT00000013018	111902	127023	158660	126907
ENSBTAP00000054939;ENSBTAP00000013448;ENSBTAP00000013449	4	4	209.18	58295	1.13506	0.954323	PAK2	PAK2|EntrezGene|Bos taurus p21 protein (Cdc42/Rac)-activated kinase 2 (PAK2), mRNA. [Source:RefSeq mRNA;Acc:NM_001206727]|1|ENSBTAG00000047856|ENSBTAT00000063094	255776	290323	208692	199159
ENSBTAP00000040442;ENSBTAP00000001383;ENSBTAP00000050842	2	2	57.84	85046	1.13505	0.512313	AOC3	||Bos taurus amine oxidase, copper containing 3 (vascular adhesion protein 1) (AOC3), mRNA. [Source:RefSeq mRNA;Acc:NM_181002]|19|ENSBTAG00000030333|ENSBTAT00000042831	87423.6	99230.3	93959.2	48136.5
ENSBTAP00000027507	2	2	106.52	26565	1.13321	1.07294	PSMA5	PSMA5|UniProtKB Gene Name|Bos taurus proteasome (prosome, macropain) subunit, alpha type, 5 (PSMA5), mRNA. [Source:RefSeq mRNA;Acc:NM_001015566]|3|ENSBTAG00000020641|ENSBTAT00000027507	350336	397006	295743	317315
ENSBTAP00000042663	1	1	35.39	55652	1.13294	2.55046	PEPD	PEPD|UniProtKB Gene Name|Bos taurus peptidase D (PEPD), mRNA. [Source:RefSeq mRNA;Acc:NM_001080318]|18|ENSBTAG00000031941|ENSBTAT00000045260	47826.9	54185.1	8057.83	20551.1
ENSBTAP00000014649	6	6	138.16	35892	1.13278	0.973966	PTGR1	PTGR1|EntrezGene|Bos taurus prostaglandin reductase 1 (PTGR1), mRNA. [Source:RefSeq mRNA;Acc:NM_001035281]|8|ENSBTAG00000011027|ENSBTAT00000014649	302220	342348	344050	335093
ENSBTAP00000020395	18	18	758.42	285199	1.1322	1.26534	SPTAN1	SPTAN1|HGNC Symbol|spectrin, alpha, non-erythrocytic 1 [Source:HGNC Symbol;Acc:11273]|11|ENSBTAG00000015327|ENSBTAT00000020395	1.04567e+06	1.1839e+06	771856	976664
ENSBTAP00000021497	1	1	48.9	54339	1.13176	0.950294	VTN	VTN|UniProtKB Gene Name|Bos taurus vitronectin (VTN), mRNA. [Source:RefSeq mRNA;Acc:NM_001035050]|19|ENSBTAG00000016151|ENSBTAT00000021497	68109.2	77083.2	68680.2	65266.3
ENSBTAP00000021658	5	5	197.99	80678	1.13169	1.02102	PREP	PREP|UniProtKB Gene Name|Bos taurus prolyl endopeptidase (PREP), mRNA. [Source:RefSeq mRNA;Acc:NM_174772]|9|ENSBTAG00000016281|ENSBTAT00000021658	389658	440973	411618	420271
ENSBTAP00000022299	16	16	933.1	118839	1.13145	1.00105	UBA1	UBA1|UniProtKB Gene Name|Bos taurus ubiquitin-like modifier activating enzyme 1 (UBA1), mRNA. [Source:RefSeq mRNA;Acc:NM_001102477]|X|ENSBTAG00000016764|ENSBTAT00000022299	3.00857e+06	3.40404e+06	3.01936e+06	3.02255e+06
ENSBTAP00000050939	3	3	71.12	45422	1.12695	1.41576	CSNK2A1	CSNK2A1|EntrezGene|casein kinase II subunit alpha [Source:RefSeq peptide;Acc:NP_777060]|13|ENSBTAG00000012341|ENSBTAT00000057062	82473.2	92943.2	75464.3	106839
ENSBTAP00000003770	1	1	36.52	101515	1.12642	0.577147	ANO6	ANO6|HGNC Symbol|anoctamin 6 [Source:HGNC Symbol;Acc:25240]|5|ENSBTAG00000002902|ENSBTAT00000003770	31885.1	35915.9	36500.1	21065.9
ENSBTAP00000008569	1	1	78.18	12609	1.12514	1.22721	SOD2	SOD2|UniProtKB Gene Name|Bos taurus superoxide dismutase 2, mitochondrial (SOD2), mRNA. [Source:RefSeq mRNA;Acc:NM_201527]|9|ENSBTAG00000006523|ENSBTAT00000008569	108008	121524	111550	136896
ENSBTAP00000015829	1	1	39.45	26590	1.12434	0.56001	CD63	CD63|UniProtKB Gene Name|Bos taurus CD63 molecule (CD63), mRNA. [Source:RefSeq mRNA;Acc:NM_205803]|5|ENSBTAG00000011931|ENSBTAT00000015829	216944	243920	270582	151529
ENSBTAP00000027670	3	3	165.86	31533	1.12343	0.829678	CNN2	CNN2|UniProtKB Gene Name|Bos taurus calponin 2 (CNN2), mRNA. [Source:RefSeq mRNA;Acc:NM_001035420]|7|ENSBTAG00000020764|ENSBTAT00000027670	538353	604800	582239	483071
ENSBTAP00000052422	16	13	743.35	66453	1.12178	0.94816	GRP78	GRP78|UniProtKB Gene Name|Uncharacterized protein [Source:UniProtKB/TrEMBL;Acc:F1N614]|11|ENSBTAG00000007662|ENSBTAT00000057533	5.14076e+06	5.76683e+06	5.47313e+06	5.1894e+06
ENSBTAP00000050331	1	1	54.69	32637	1.1211	0.629803	CLEC1B	CLEC1B|HGNC Symbol|C-type lectin domain family 1, member B [Source:HGNC Symbol;Acc:24356]|5|ENSBTAG00000030423|ENSBTAT00000053034	53377.9	59841.9	112174	70647.4
ENSBTAP00000007832	1	1	58.9	38576	1.12099	1.83479	EIF2S2	EIF2S2|UniProtKB Gene Name|Bos taurus eukaryotic translation initiation factor 2, subunit 2 beta, 38kDa (EIF2S2), mRNA. [Source:RefSeq mRNA;Acc:NM_001015621]|13|ENSBTAG00000005969|ENSBTAT00000007832	54119.7	60667.8	34427.9	63167.8
ENSBTAP00000027852;ENSBTAP00000038468	8	7	611.76	45633	1.12082	0.954991	NAP1L1	NAP1L1|UniProtKB Gene Name|Bos taurus nucleosome assembly protein 1-like 1 (NAP1L1), mRNA. [Source:RefSeq mRNA;Acc:NM_001099215]|5|ENSBTAG00000020908|ENSBTAT00000027852	2.56516e+06	2.87508e+06	3.4089e+06	3.25546e+06
ENSBTAP00000020644;ENSBTAP00000002436	2	1	64.51	60377	1.12073	0.846147	CPNE3	CPNE3|UniProtKB Gene Name|Bos taurus copine III (CPNE3), mRNA. [Source:RefSeq mRNA;Acc:NM_001099142]|14|ENSBTAG00000015536|ENSBTAT00000020644	19829.6	22223.6	21257.4	17986.8
ENSBTAP00000014924	1	1	14.79	27858	1.12068	1.26077	CD48	CD48|UniProtKB Gene Name|Bos taurus CD48 molecule (CD48), mRNA. [Source:RefSeq mRNA;Acc:NM_001046002]|3|ENSBTAG00000011238|ENSBTAT00000014924	33209	37216.6	11926	15035.9
ENSBTAP00000008225;ENSBTAP00000026786	28	15	1417.13	85077	1.12017	1.20807	HSP90AA1	HSP90AA1|UniProtKB Gene Name|Bos taurus heat shock protein 90kDa alpha (cytosolic), class A member 1 (HSP90AA1), mRNA. [Source:RefSeq mRNA;Acc:NM_001012670]|21|ENSBTAG00000006270|ENSBTAT00000008225	1.25026e+07	1.40051e+07	9.69531e+06	1.17126e+07
ENSBTAP00000009832	2	2	67.38	89262	1.1194	1.77167	EIF3B	EIF3B|UniProtKB Gene Name|Bos taurus eukaryotic translation initiation factor 3, subunit B (EIF3B), mRNA. [Source:RefSeq mRNA;Acc:NM_001102356]|25|ENSBTAG00000007474|ENSBTAT00000009832	72865	81565.4	36063.3	63892.2
ENSBTAP00000024660	1	1	55.82	20550	1.11805	1.02874	HDGFRP3	HDGFRP3|EntrezGene|Bos taurus hepatoma-derived growth factor, related protein 3 (HDGFRP3), mRNA. [Source:RefSeq mRNA;Acc:NM_001191368]|21|ENSBTAG00000018527|ENSBTAT00000024660	112111	125346	111846	115061
ENSBTAP00000019001	1	1	20.11	68210	1.11802	0.840231	TOMM70A	TOMM70A|UniProtKB Gene Name|Bos taurus translocase of outer mitochondrial membrane 70 homolog A (S. cerevisiae) (TOMM70A), mRNA. [Source:RefSeq mRNA;Acc:NM_001075328]|1|ENSBTAG00000014302|ENSBTAT00000019001	19714.2	22040.8	19932	16747.5
ENSBTAP00000029090;ENSBTAP00000029088	6	6	173.9	49389	1.11741	1.35998	DDX39B	DDX39B|UniProtKB Gene Name|Bos taurus DEAD (Asp-Glu-Ala-Asp) box polypeptide 39B (DDX39B), mRNA. [Source:RefSeq mRNA;Acc:NM_001033629]|23|ENSBTAG00000014490|ENSBTAT00000029090	582728	651145	370732	504187
ENSBTAP00000008799	4	3	146.38	57694	1.11511	0.946863	ARCN1	ARCN1|UniProtKB Gene Name|Bos taurus archain 1 (ARCN1), mRNA. [Source:RefSeq mRNA;Acc:NM_001195013]|15|ENSBTAG00000006690|ENSBTAT00000008799	111856	124732	122328	115828
ENSBTAP00000022911;ENSBTAP00000017588	2	2	33.68	98700	1.11339	0.93569	COPG2	COPG2|UniProtKB Gene Name|Bos taurus coatomer protein complex, subunit gamma 2 (COPG2), mRNA. [Source:RefSeq mRNA;Acc:NM_001082448]|4|ENSBTAG00000017245|ENSBTAT00000022911	29528.2	32876.3	34456.1	32240.2
ENSBTAP00000029245;ENSBTAP00000013453;ENSBTAP00000025810;ENSBTAP00000055238;ENSBTAP00000054759	6	6	358.95	11360	1.11286	1.7432	HIST1H4D	HIST1H4D|HGNC Symbol|histone cluster 1, H4d [Source:HGNC Symbol;Acc:4782]|5|ENSBTAG00000030504|ENSBTAT00000029245	6.58085e+07	7.32354e+07	5.59678e+07	9.7563e+07
ENSBTAP00000056302	5	5	322.15	41748	1.11188	1.15101	ARPC1B	ARPC1B|UniProtKB Gene Name|Bos taurus actin related protein 2/3 complex, subunit 1B, 41kDa (ARPC1B), mRNA. [Source:RefSeq mRNA;Acc:NM_001014844]|25|ENSBTAG00000046248|ENSBTAT00000064158	1.57517e+06	1.75139e+06	783443	901754
ENSBTAP00000027296	4	4	163.54	47502	1.11187	0.989418	ARRB1	ARRB1|UniProtKB Gene Name|Bos taurus arrestin, beta 1 (ARRB1), mRNA. [Source:RefSeq mRNA;Acc:NM_174243]|15|ENSBTAG00000020485|ENSBTAT00000027296	488376	543012	615621	609106
ENSBTAP00000055564	8	8	563.46	26845	1.11173	1.01328	RNH1	RNH1|EntrezGene|Bos taurus ribonuclease/angiogenin inhibitor 1 (RNH1), mRNA. [Source:RefSeq mRNA;Acc:NM_001035319]|GJ060032.1|ENSBTAG00000046869|ENSBTAT00000065344	1.03184e+06	1.14713e+06	825909	836877
ENSBTAP00000016359	3	3	124.33	13782	1.11065	1.21561	B2M	B2M|UniProtKB Gene Name|Beta-2-microglobulin [Source:UniProtKB/Swiss-Prot;Acc:P01888]|10|ENSBTAG00000012330|ENSBTAT00000016359	4.69228e+06	5.21147e+06	3.63209e+06	4.41519e+06
ENSBTAP00000008335	6	6	186.96	45643	1.10917	0.948129	HP	HP|UniProtKB Gene Name|Bos taurus haptoglobin (HP), mRNA. [Source:RefSeq mRNA;Acc:NM_001040470]|18|ENSBTAG00000006354|ENSBTAT00000008335	296567	328944	458738	434942
ENSBTAP00000009308;ENSBTAP00000031879;ENSBTAP00000053019	33	32	1708.31	70752	1.10852	1.497	LCP1	LCP1|HGNC Symbol|lymphocyte cytosolic protein 1 (L-plastin) [Source:HGNC Symbol;Acc:6528]|12|ENSBTAG00000007079|ENSBTAT00000009308	3.22967e+07	3.58016e+07	1.56549e+07	2.34353e+07
ENSBTAP00000009208	12	12	551.24	275019	1.10851	1.29907	SPTBN1	SPTBN1|HGNC Symbol|spectrin, beta, non-erythrocytic 1 [Source:HGNC Symbol;Acc:11275]|11|ENSBTAG00000006995|ENSBTAT00000009208	561271	622175	399549	519043
ENSBTAP00000009158;ENSBTAP00000043991	20	3	1220.91	50095	1.10809	0.903373	TUBB5	TUBB5|UniProtKB Gene Name|Bos taurus tubulin, beta class I (TUBB), mRNA. [Source:RefSeq mRNA;Acc:NM_001046549]|23|ENSBTAG00000006969|ENSBTAT00000009158	3.45642e+06	3.83003e+06	4.30518e+06	3.88918e+06
ENSBTAP00000005629	7	4	304.9	49086	1.10784	0.790906	SEPT6	SEPT6|UniProtKB Gene Name|Bos taurus septin 6 (SEPT6), mRNA. [Source:RefSeq mRNA;Acc:NM_001035430]|X|ENSBTAG00000004291|ENSBTAT00000005629	652247	722584	688313	544391
ENSBTAP00000004431	6	6	315.13	32041	1.10582	0.845439	ESD	ESD|UniProtKB Gene Name|Bos taurus esterase D (ESD), mRNA. [Source:RefSeq mRNA;Acc:NM_001076065]|12|ENSBTAG00000003415|ENSBTAT00000004431	1.17973e+06	1.30456e+06	1.50562e+06	1.27291e+06
ENSBTAP00000025662	8	8	387.35	65012	1.10533	1.17005	ATIC	ATIC|UniProtKB Gene Name|Bos taurus 5-aminoimidazole-4-carboxamide ribonucleotide formyltransferase/IMP cyclohydrolase (ATIC), mRNA. [Source:RefSeq mRNA;Acc:NM_001075254]|2|ENSBTAG00000019274|ENSBTAT00000025662	1.46551e+06	1.61988e+06	1.43552e+06	1.67963e+06
ENSBTAP00000028048	3	3	88.83	45768	1.10429	1.17191	PSMC5	PSMC5|UniProtKB Gene Name|Bos taurus proteasome (prosome, macropain) 26S subunit, ATPase, 5 (PSMC5), mRNA. [Source:RefSeq mRNA;Acc:NM_174441]|19|ENSBTAG00000021061|ENSBTAT00000028048	114696	126658	97164.2	113868
ENSBTAP00000001187;ENSBTAP00000039006	16	16	1019.99	44908	1.10424	1.03969	PGK1	PGK1|UniProtKB Gene Name|Bos taurus phosphoglycerate kinase 1 (PGK1), mRNA. [Source:RefSeq mRNA;Acc:NM_001034299]|X|ENSBTAG00000000894|ENSBTAT00000001187	1.12943e+07	1.24717e+07	8.27586e+06	8.60431e+06
ENSBTAP00000027246	1	1	26.61	78998	1.10369	1.02382	THOP1	THOP1|UniProtKB Gene Name|Bos taurus thimet oligopeptidase 1 (THOP1), mRNA. [Source:RefSeq mRNA;Acc:NM_001033991]|7|ENSBTAG00000020446|ENSBTAT00000027246	69716.2	76945.1	94062.5	96302.8
ENSBTAP00000013636	1	1	24.09	111842	1.10217	1.37492	HYOU1	HYOU1|HGNC Symbol|hypoxia up-regulated 1 [Source:HGNC Symbol;Acc:16931]|15|ENSBTAG00000010322|ENSBTAT00000013636	17350.8	19123.6	19871.2	27321.3
ENSBTAP00000021304	1	1	15.9	40450	1.10171	1.38862	ADH5	ADH5|UniProtKB Gene Name|Bos taurus alcohol dehydrogenase 5 (class III), chi polypeptide (ADH5), mRNA. [Source:RefSeq mRNA;Acc:NM_001034249]|6|ENSBTAG00000016007|ENSBTAT00000021304	61828	68116.7	36958.2	51320.9
ENSBTAP00000000240	1	1	60.75	13788	1.10095	0.647199	ATP6V1G1	ATP6V1G1|UniProtKB Gene Name|Bos taurus ATPase, H+ transporting, lysosomal 13kDa, V1 subunit G1 (ATP6V1G1), mRNA. [Source:RefSeq mRNA;Acc:NM_174245]|8|ENSBTAG00000000203|ENSBTAT00000000240	53500.7	58901.6	59865.8	38745.1
ENSBTAP00000025691	11	10	388.44	36700	1.10068	0.778082	MDH1	MDH1|UniProtKB Gene Name|Bos taurus malate dehydrogenase 1, NAD (soluble) (MDH1), mRNA. [Source:RefSeq mRNA;Acc:NM_001034628]|11|ENSBTAG00000019295|ENSBTAT00000025691	2.96702e+06	3.26573e+06	3.10837e+06	2.41857e+06
ENSBTAP00000003560	6	6	229.04	24055	1.09876	1.07739	OSTF1	OSTF1|UniProtKB Gene Name|Bos taurus osteoclast stimulating factor 1 (OSTF1), mRNA. [Source:RefSeq mRNA;Acc:NM_174409]|8|ENSBTAG00000002746|ENSBTAT00000003560	1.06874e+06	1.17428e+06	820533	884032
ENSBTAP00000025152;ENSBTAP00000051244	3	3	76.39	47719	1.09853	1.1993	PSMD11	PSMD11|UniProtKB Gene Name|Bos taurus proteasome (prosome, macropain) 26S subunit, non-ATPase, 11 (PSMD11), mRNA. [Source:RefSeq mRNA;Acc:NM_001046148]|19|ENSBTAG00000018897|ENSBTAT00000025152	141595	155546	122605	147040
ENSBTAP00000042244;ENSBTAP00000019429	6	6	241.68	26902	1.09814	1.08605	EFHD2	EFHD2|UniProtKB Gene Name|Bos taurus EF-hand domain family, member D2 (EFHD2), mRNA. [Source:RefSeq mRNA;Acc:NM_001103245]|16|ENSBTAG00000009048|ENSBTAT00000044780	1.40585e+06	1.54383e+06	694447	754206
ENSBTAP00000021045	6	6	162.65	115389	1.098	1.31575	MAP4	MAP4|UniProtKB Gene Name|Bos taurus microtubule-associated protein 4 (MAP4), mRNA. [Source:RefSeq mRNA;Acc:NM_174105]|22|ENSBTAG00000015839|ENSBTAT00000021045	503613	552969	356624	469229
ENSBTAP00000005730	3	3	101.95	51968	1.09791	1.04837	CS	CS|UniProtKB Gene Name|Bos taurus citrate synthase (CS), mRNA. [Source:RefSeq mRNA;Acc:NM_001044721]|5|ENSBTAG00000004371|ENSBTAT00000005730	399234	438322	483796	507198
ENSBTAP00000026449;ENSBTAP00000027023	6	6	276.09	66038	1.09777	0.997075	PPP2R1A	PPP2R1A|UniProtKB Gene Name|Bos taurus protein phosphatase 2, regulatory subunit A, alpha (PPP2R1A), mRNA. [Source:RefSeq mRNA;Acc:NM_001037477]|18|ENSBTAG00000019851|ENSBTAT00000026449	707944	777160	652740	650831
ENSBTAP00000043338	5	5	182.95	13132	1.09662	0.71394	PPBP	PPBP|HGNC Symbol|pro-platelet basic protein (chemokine (C-X-C motif) ligand 7) [Source:HGNC Symbol;Acc:9240]|6|ENSBTAG00000032425|ENSBTAT00000046001	6.29552e+06	6.90379e+06	1.19468e+07	8.52928e+06
ENSBTAP00000008386	17	16	686.08	63043	1.09639	1.04709	GPI	GPI|UniProtKB Gene Name|Bos taurus glucose-6-phosphate isomerase (GPI), mRNA. [Source:RefSeq mRNA;Acc:NM_001040471]|18|ENSBTAG00000006396|ENSBTAT00000008386	3.03099e+06	3.32315e+06	2.34365e+06	2.45401e+06
ENSBTAP00000019538	1	1	43.57	20297	1.09568	1.53848	LGB	LGB|UniProtKB Gene Name|Bos taurus progestagen-associated endometrial protein (PAEP), mRNA. [Source:RefSeq mRNA;Acc:NM_173929]|11|ENSBTAG00000014678|ENSBTAT00000019538	37941.3	41571.7	33549.8	51615.6
ENSBTAP00000016778	2	2	92.57	41071	1.0954	0.664393	UROD	UROD|EntrezGene|Bos taurus uroporphyrinogen decarboxylase (UROD), mRNA. [Source:RefSeq mRNA;Acc:NM_001205558]|3|ENSBTAG00000012644|ENSBTAT00000016778	37402.2	40970.4	101379	67355.7
ENSBTAP00000020886	2	2	92.21	44430	1.09288	0.981206	PSMC6	PSMC6|EntrezGene|Bos taurus proteasome (prosome, macropain) 26S subunit, ATPase, 6 (PSMC6), mRNA. [Source:RefSeq mRNA;Acc:NM_001046240]|10|ENSBTAG00000015732|ENSBTAT00000020886	131070	143244	127993	125588
ENSBTAP00000018917;ENSBTAP00000049380	14	14	688.84	60142	1.0909	1.08328	CCT8	CCT8|UniProtKB Gene Name|Bos taurus chaperonin containing TCP1, subunit 8 (theta) (CCT8), mRNA. [Source:RefSeq mRNA;Acc:NM_001033609]|1|ENSBTAG00000014233|ENSBTAT00000018917	1.73375e+06	1.89135e+06	1.80133e+06	1.95134e+06
ENSBTAP00000025501	5	5	189.18	33609	1.09043	0.993815	GLOD4	GLOD4|HGNC Symbol|glyoxalase domain containing 4 [Source:HGNC Symbol;Acc:14111]|19|ENSBTAG00000019160|ENSBTAT00000025501	532787	580969	388203	385802
ENSBTAP00000006754	1	1	36.72	106845	1.09029	1.58845	PSMD1	PSMD1|UniProtKB Gene Name|Bos taurus proteasome (prosome, macropain) 26S subunit, non-ATPase, 1 (PSMD1), mRNA. [Source:RefSeq mRNA;Acc:NM_001101077]|2|ENSBTAG00000005119|ENSBTAT00000006754	92102.7	100418	69366	110184
ENSBTAP00000025447	1	1	15.75	26529	1.09022	0.530898	MOBKL3	MOBKL3|UniProtKB Gene Name|Bos taurus MOB1, Mps One Binder kinase activator-like 3 (yeast) (MOBKL3), mRNA. [Source:RefSeq mRNA;Acc:NM_001083526]|2|ENSBTAG00000019116|ENSBTAT00000025447	59676.8	65061	95410.8	50653.4
ENSBTAP00000021203	1	1	26.4	33719	1.08991	0.853698	WDR61	WDR61|UniProtKB Gene Name|Bos taurus WD repeat domain 61 (WDR61), mRNA. [Source:RefSeq mRNA;Acc:NM_001038097]|21|ENSBTAG00000015944|ENSBTAT00000021203	29801.8	32481.2	34223.4	29216.5
ENSBTAP00000014666;ENSBTAP00000000453	3	3	71.6	21809	1.0889	0.674801	RAC2	RAC2|UniProtKB Gene Name|Bos taurus ras-related C3 botulinum toxin substrate 2 (rho family, small GTP binding protein Rac2) (RAC2), mRNA. [Source:RefSeq mRNA;Acc:NM_175792]|5|ENSBTAG00000011043|ENSBTAT00000014666	651975	709934	599530	404564
ENSBTAP00000051256	4	1	179.79	22140	1.08868	3.97911	HIST1H1D	HIST1H1D|UniProtKB Gene Name|Bos taurus histone cluster 1, H1d (HIST1H1D), mRNA. [Source:RefSeq mRNA;Acc:NM_001101066]|23|ENSBTAG00000039163|ENSBTAT00000053914	51187.5	55727	23136.7	92063.5
ENSBTAP00000013734	3	2	126.52	30986	1.08845	1.34534	C1QBP	C1QBP|UniProtKB Gene Name|Bos taurus complement component 1, q subcomponent binding protein (C1QBP), mRNA. [Source:RefSeq mRNA;Acc:NM_001034527]|19|ENSBTAG00000012739|ENSBTAT00000013734	203836	221865	208653	280711
ENSBTAP00000002342;ENSBTAP00000002344;ENSBTAP00000042180	4	4	173.97	79504	1.08769	1.20224	SAFB2	||Uncharacterized protein [Source:UniProtKB/TrEMBL;Acc:G3X6B1]|7|ENSBTAG00000035584|ENSBTAT00000002342	527555	573817	329627	396290
ENSBTAP00000015388	1	1	28.93	82125	1.0871	0.973242	APEH	APEH|UniProtKB Gene Name|Bos taurus N-acylaminoacyl-peptide hydrolase (APEH), mRNA. [Source:RefSeq mRNA;Acc:NM_001083431]|22|ENSBTAG00000011583|ENSBTAT00000015388	58444.4	63534.7	57569.8	56029.3
ENSBTAP00000008431	6	6	256.12	86047	1.08652	1.08248	ACO2	ACO2|UniProtKB Gene Name|Bos taurus aconitase 2, mitochondrial (ACO2), mRNA. [Source:RefSeq mRNA;Acc:NM_173977]|5|ENSBTAG00000006429|ENSBTAT00000008431	297815	323583	280148	303253
ENSBTAP00000007943	15	14	593.24	57567	1.08539	0.820376	P4HB	P4HB|UniProtKB Gene Name|Bos taurus prolyl 4-hydroxylase, beta polypeptide (P4HB), mRNA. [Source:RefSeq mRNA;Acc:NM_174135]|19|ENSBTAG00000006045|ENSBTAT00000007943	4.40507e+06	4.78121e+06	5.4635e+06	4.48213e+06
ENSBTAP00000016346;ENSBTAP00000052701	7	7	418.81	32244	1.08291	1.38044	PNP	PNP|UniProtKB Gene Name|Bos taurus purine nucleoside phosphorylase (PNP), mRNA. [Source:RefSeq mRNA;Acc:NM_001007818]|10|ENSBTAG00000012317|ENSBTAT00000016346	1.79364e+06	1.94234e+06	1.47022e+06	2.02955e+06
ENSBTAP00000031665	4	4	121.81	49785	1.08131	0.560073	TES	TES|UniProtKB Gene Name|Bos taurus testis derived transcript (3 LIM domains) (TES), mRNA. [Source:RefSeq mRNA;Acc:NM_001046390]|4|ENSBTAG00000021204|ENSBTAT00000031716	247632	267768	347146	194427
ENSBTAP00000008060	1	1	17.29	485823	1.07997	0.821092	HUWE1	HUWE1|HGNC Symbol|HECT, UBA and WWE domain containing 1, E3 ubiquitin protein ligase [Source:HGNC Symbol;Acc:30892]|X|ENSBTAG00000006122|ENSBTAT00000008060	7166.42	7739.51	10145	8329.94
ENSBTAP00000006947	1	1	26.46	41266	1.07942	3.04466	ADA	ADA|UniProtKB Gene Name|Bos taurus adenosine deaminase (ADA), mRNA. [Source:RefSeq mRNA;Acc:NM_173887]|13|ENSBTAG00000005280|ENSBTAT00000006947	56576.3	61069.7	5751.65	17511.8
ENSBTAP00000007933	9	8	623.41	22836	1.07927	1.02888	ARHGDIB	ARHGDIB|UniProtKB Gene Name|Bos taurus Rho GDP dissociation inhibitor (GDI) beta (ARHGDIB), mRNA. [Source:RefSeq mRNA;Acc:NM_175797]|5|ENSBTAG00000006039|ENSBTAT00000007933	1.14455e+07	1.23528e+07	1.15786e+07	1.1913e+07
ENSBTAP00000019575	6	1	373.66	21316	1.07909	0.948841	RAP1A	RAP1A|UniProtKB Gene Name|Bos taurus RAP1A, member of RAS oncogene family (RAP1A), mRNA. [Source:RefSeq mRNA;Acc:NM_174448]|3|ENSBTAG00000014710|ENSBTAT00000019575	136473	147267	128516	121941
ENSBTAP00000003431	2	2	85.7	17708	1.07784	1.56238	RPS18	RPS18|UniProtKB Gene Name|Bos taurus ribosomal protein S18 (RPS18), mRNA. [Source:RefSeq mRNA;Acc:NM_001033614]|23|ENSBTAG00000002648|ENSBTAT00000003431	194983	210160	78055	121951
ENSBTAP00000003072	3	3	104.98	22996	1.07712	1.1344	PSMB2	PSMB2|UniProtKB Gene Name|Bos taurus proteasome (prosome, macropain) subunit, beta type, 2 (PSMB2), mRNA. [Source:RefSeq mRNA;Acc:NM_001015615]|3|ENSBTAG00000002377|ENSBTAT00000003072	319388	344020	236369	268136
ENSBTAP00000004381;ENSBTAP00000050691	3	2	103.66	89272	1.07658	0.889698	ACAP2	ACAP2|UniProtKB Gene Name|Bos taurus ArfGAP with coiled-coil, ankyrin repeat and PH domains 2 (ACAP2), mRNA. [Source:RefSeq mRNA;Acc:NM_001105337]|1|ENSBTAG00000003378|ENSBTAT00000004381	82138.3	88428.4	116040	103241
ENSBTAP00000009800	7	7	308.94	86737	1.07627	0.906672	CFB	CFB|UniProtKB Gene Name|Bos taurus complement factor B (CFB), mRNA. [Source:RefSeq mRNA;Acc:NM_001040526]|23|ENSBTAG00000046158|ENSBTAT00000009800	615225	662147	700840	635432
ENSBTAP00000027314	1	1	20.29	18499	1.07623	1.12353	ACP1	ACP1|UniProtKB Gene Name|Bos taurus acid phosphatase 1, soluble (ACP1), mRNA. [Source:RefSeq mRNA;Acc:NM_173978]|GJ058425.1|ENSBTAG00000020498|ENSBTAT00000027314	364724	392526	370253	415992
ENSBTAP00000003204	1	1	36.79	45981	1.07503	1.0949	ANGPTL4	ANGPTL4|UniProtKB Gene Name|Bos taurus angiopoietin-like 4 (ANGPTL4), mRNA. [Source:RefSeq mRNA;Acc:NM_001046043]|7|ENSBTAG00000002473|ENSBTAT00000003204	23789.1	25574.1	33116.4	36259.3
ENSBTAP00000013464	3	3	97.28	24664	1.07439	0.851938	PCMT1	PCMT1|UniProtKB Gene Name|Bos taurus protein-L-isoaspartate (D-aspartate) O-methyltransferase (PCMT1), mRNA. [Source:RefSeq mRNA;Acc:NM_001079617]|9|ENSBTAG00000010204|ENSBTAT00000013464	373906	401721	300597	256090
ENSBTAP00000030092;ENSBTAP00000028781	3	2	108.93	17684	1.07383	1.60157	RPL23A	RPL23A|UniProtKB Gene Name|60S ribosomal protein L23a [Source:UniProtKB/Swiss-Prot;Acc:Q24JY1]|X|ENSBTAG00000022278|ENSBTAT00000030106	199750	214499	120309	192683
ENSBTAP00000024825	1	1	15.3	61725	1.07362	0.82928	HP1BP3	HP1BP3|UniProtKB Gene Name|Bos taurus heterochromatin protein 1, binding protein 3 (HP1BP3), mRNA. [Source:RefSeq mRNA;Acc:NM_001075436]|2|ENSBTAG00000018656|ENSBTAT00000024825	50980.6	54733.7	33005.5	27370.8
ENSBTAP00000018110	4	3	108.09	69096	1.07293	1.21627	LMNB2	LMNB2|HGNC Symbol|lamin B2 [Source:HGNC Symbol;Acc:6638]|7|ENSBTAG00000013624|ENSBTAT00000018110	139670	149856	154425	187822
ENSBTAP00000027388	1	1	38.56	16844	1.07272	1.12541	AIF1	AIF1|UniProtKB Gene Name|Bos taurus allograft inflammatory factor 1 (AIF1), mRNA. [Source:RefSeq mRNA;Acc:NM_173985]|23|ENSBTAG00000020554|ENSBTAT00000027388	275896	295959	160165	180252
ENSBTAP00000024155;ENSBTAP00000053873;ENSBTAP00000054314;ENSBTAP00000005884;ENSBTAP00000036521;ENSBTAP00000044080;ENSBTAP00000049583;ENSBTAP00000032775;ENSBTAP00000054234;ENSBTAP00000055313	8	1	429.57	13898	1.07224	1.59184	H2B	H2B|UniProtKB Gene Name|Bos taurus histone H2B-like (H2B), mRNA. [Source:RefSeq mRNA;Acc:NM_001037469]|3|ENSBTAG00000038604|ENSBTAT00000024155	4.81014e+06	5.15761e+06	3.71429e+06	5.91255e+06
ENSBTAP00000003962	7	7	236.28	26842	1.07122	1.80662	RPS3	RPS3|UniProtKB Gene Name|Bos taurus ribosomal protein S3 (RPS3), mRNA. [Source:RefSeq mRNA;Acc:NM_001034047]|15|ENSBTAG00000005620|ENSBTAT00000003962	1.02776e+06	1.10096e+06	555425	1.00344e+06
ENSBTAP00000026826	1	1	50.66	29207	1.07094	3.15703	RPL7	RPL7|UniProtKB Gene Name|Bos taurus ribosomal protein L7 (RPL7), mRNA. [Source:RefSeq mRNA;Acc:NM_001014928]|14|ENSBTAG00000020139|ENSBTAT00000026826	56339.3	60336.2	20930.6	66078.5
ENSBTAP00000002717	2	2	64.2	141409	1.07052	0.689623	PLCG2	PLCG2|HGNC Symbol|phospholipase C, gamma 2 (phosphatidylinositol-specific) [Source:HGNC Symbol;Acc:9066]|18|ENSBTAG00000002103|ENSBTAT00000002717	40320.4	43163.7	70956.9	48933.6
ENSBTAP00000019547;ENSBTAP00000055448	5	5	268.42	24711	1.07015	1.31158	HPRT1	HPRT1|UniProtKB Gene Name|Bos taurus hypoxanthine phosphoribosyltransferase 1 (HPRT1), mRNA. [Source:RefSeq mRNA;Acc:NM_001034035]|X|ENSBTAG00000014685|ENSBTAT00000019547	514199	550272	273848	359173
ENSBTAP00000045533	3	3	113.01	33396	1.06888	1.34957	MTAP	||S-methyl-5'-thioadenosine phosphorylase [Source:UniProtKB/TrEMBL;Acc:H9KUV2]|8|ENSBTAG00000025929|ENSBTAT00000048509	720551	770180	413148	557571
ENSBTAP00000053578;ENSBTAP00000043010	4	4	213.15	126421	1.06734	1.35649	RANBP6	RANBP6|UniProtKB Gene Name|Bos taurus importin 5 (IPO5), mRNA. [Source:RefSeq mRNA;Acc:NM_001037817]|12|ENSBTAG00000039374|ENSBTAT00000061564	370299	395237	303998	412371
ENSBTAP00000012764	3	3	121.6	48014	1.0671	0.913996	STK25	STK25|EntrezGene|Bos taurus serine/threonine kinase 25 (STK25), mRNA. [Source:RefSeq mRNA;Acc:NM_183407]|3|ENSBTAG00000009676|ENSBTAT00000012764	177011	188888	176488	161310
ENSBTAP00000020111	15	15	748.62	48239	1.06629	0.794879	CALR	CALR|UniProtKB Gene Name|Bos taurus calreticulin (CALR), mRNA. [Source:RefSeq mRNA;Acc:NM_174000]|7|ENSBTAG00000015114|ENSBTAT00000020111	8.46298e+06	9.02401e+06	1.24506e+07	9.8967e+06
ENSBTAP00000021260	10	10	522.9	277000	1.06611	1.11145	FASN	FASN|HGNC Symbol|fatty acid synthase [Source:HGNC Symbol;Acc:3594]|19|ENSBTAG00000015980|ENSBTAT00000021260	673032	717529	602604	669766
ENSBTAP00000021517	1	1	73.55	145681	1.06546	1.05952	FLII	FLII|HGNC Symbol|flightless I homolog (Drosophila) [Source:HGNC Symbol;Acc:3750]|19|ENSBTAG00000016161|ENSBTAT00000021517	78362.2	83492	81517.3	86369.1
ENSBTAP00000009437	1	1	16.97	42325	1.06458	1.24943	P2RX1	P2RX1|HGNC Symbol|purinergic receptor P2X, ligand-gated ion channel, 1 [Source:HGNC Symbol;Acc:8533]|19|ENSBTAG00000007169|ENSBTAT00000009437	15316.6	16305.7	21446.4	26795.8
ENSBTAP00000024326	1	1	76.79	23419	1.06344	0.566923	ATP5O	ATP5O|UniProtKB Gene Name|Bos taurus ATP synthase, H+ transporting, mitochondrial F1 complex, O subunit (ATP5O), mRNA. [Source:RefSeq mRNA;Acc:NM_174244]|1|ENSBTAG00000018278|ENSBTAT00000024326	62186.3	66131.5	85889.2	48692.6
ENSBTAP00000017995;ENSBTAP00000002299	10	9	703.52	27317	1.0624	0.933856	CLIC1	CLIC1|UniProtKB Gene Name|Bos taurus chloride intracellular channel 1 (CLIC1), mRNA. [Source:RefSeq mRNA;Acc:NM_001015608]|23|ENSBTAG00000013533|ENSBTAT00000017995	6.94926e+06	7.3829e+06	8.56102e+06	7.99476e+06
ENSBTAP00000003500	1	1	42.85	24316	1.06198	0.70313	TSPAN32	TSPAN32|HGNC Symbol|tetraspanin 32 [Source:HGNC Symbol;Acc:13410]|29|ENSBTAG00000002702|ENSBTAT00000003500	36235.4	38481.2	27629.9	19427.4
ENSBTAP00000027850	2	2	102.55	20468	1.06163	1.79645	RPL11	RPL11|UniProtKB Gene Name|Bos taurus ribosomal protein L11 (RPL11), mRNA. [Source:RefSeq mRNA;Acc:NM_001075581]|2|ENSBTAG00000020905|ENSBTAT00000027850	180684	191819	86833.8	155992
ENSBTAP00000017968	1	1	40.84	44129	1.06151	1.05938	ATP6V1C1	ATP6V1C1|UniProtKB Gene Name|Bos taurus ATPase, H+ transporting, lysosomal 42kDa, V1 subunit C1 (ATP6V1C1), mRNA. [Source:RefSeq mRNA;Acc:NM_176676]|14|ENSBTAG00000013513|ENSBTAT00000017968	22633.6	24025.7	18530.9	19631.2
ENSBTAP00000028712	2	2	50.16	14036	1.06132	0.740528	PHPT1	PHPT1|UniProtKB Gene Name|Bos taurus phosphohistidine phosphatase 1 (PHPT1), mRNA. [Source:RefSeq mRNA;Acc:NM_001076516]|11|ENSBTAG00000021549|ENSBTAT00000028712	223426	237126	156416	115830
ENSBTAP00000001309	3	3	105.61	25996	1.06108	1.41706	PSMA2	PSMA2|UniProtKB Gene Name|Bos taurus proteasome (prosome, macropain) subunit, alpha type, 2 (PSMA2), mRNA. [Source:RefSeq mRNA;Acc:NM_001034662]|4|ENSBTAG00000000990|ENSBTAT00000001309	461917	490132	395920	561043
ENSBTAP00000023778	12	11	551.96	60033	1.06087	1.13356	CCT5	CCT5|EntrezGene|Bos taurus chaperonin containing TCP1, subunit 5 (epsilon) (CCT5), mRNA. [Source:RefSeq mRNA;Acc:NM_001034595]|20|ENSBTAG00000017889|ENSBTAT00000023778	1.6094e+06	1.70737e+06	1.43003e+06	1.62103e+06
ENSBTAP00000001379	2	1	65.66	24682	1.0607	1.31518	SNRPB	SNRPB|HGNC Symbol|small nuclear ribonucleoprotein polypeptides B and B1 [Source:HGNC Symbol;Acc:11153]|13|ENSBTAG00000001038|ENSBTAT00000001379	168967	179223	120498	158477
ENSBTAP00000042411	2	2	40.28	32727	1.06062	2.23718	RPL6	RPL6|UniProtKB Gene Name|Bos taurus ribosomal protein L6 (RPL6), mRNA. [Source:RefSeq mRNA;Acc:NM_001031756]|17|ENSBTAG00000031723|ENSBTAT00000033359	174215	184777	58246.8	130308
ENSBTAP00000005600;ENSBTAP00000018998;ENSBTAP00000054785	4	4	260.34	22096	1.06053	0.746267	RHOA	RHOA|UniProtKB Gene Name|Bos taurus ras homolog gene family, member A (RHOA), mRNA. [Source:RefSeq mRNA;Acc:NM_176645]|22|ENSBTAG00000004279|ENSBTAT00000005600	1.0581e+06	1.12214e+06	1.04504e+06	779880
ENSBTAP00000023082	3	3	111.1	143969	1.0596	1.47395	DIAPH1	DIAPH1|HGNC Symbol|diaphanous-related formin 1 [Source:HGNC Symbol;Acc:2876]|7|ENSBTAG00000030499|ENSBTAT00000023082	157765	167168	96552	142312
ENSBTAP00000029889	7	6	365.85	44185	1.05711	0.996443	NAP1L4	NAP1L4|HGNC Symbol|nucleosome assembly protein 1-like 4 [Source:HGNC Symbol;Acc:7640]|29|ENSBTAG00000022160|ENSBTAT00000029894	695854	735593	798257	795417
ENSBTAP00000013775	1	1	18.34	14539	1.05659	1.15403	M-SAA3.2	M-SAA3.2|EntrezGene|Bos taurus mammary serum amyloid A3.2 (M-SAA3.2), mRNA. [Source:RefSeq mRNA;Acc:NM_001242573]|29|ENSBTAG00000010433|ENSBTAT00000013775	113649	120081	75478.7	87104.6
ENSBTAP00000008184	1	1	18.45	119873	1.05638	1.07348	NPR1	NPR1|EntrezGene|Bos taurus natriuretic peptide receptor A/guanylate cyclase A (atrionatriuretic peptide receptor A) (NPR1), mRNA. [Source:RefSeq mRNA;Acc:NM_001192751]|3|ENSBTAG00000006234|ENSBTAT00000008184	329923	348525	222301	238637
ENSBTAP00000001303	4	2	134.31	22755	1.05596	0.843329	RAB10	RAB10|UniProtKB Gene Name|Bos taurus RAB10, member RAS oncogene family (RAB10), mRNA. [Source:RefSeq mRNA;Acc:NM_001101288]|11|ENSBTAG00000000985|ENSBTAT00000001303	142025	149973	133557	112633
ENSBTAP00000005174	2	2	37.37	31517	1.05514	1.15313	OTUB1	OTUB1|UniProtKB Gene Name|Bos taurus OTU domain, ubiquitin aldehyde binding 1 (OTUB1), mRNA. [Source:RefSeq mRNA;Acc:NM_001034719]|29|ENSBTAG00000003967|ENSBTAT00000005174	81465.9	85958.1	42374.5	48863.3
ENSBTAP00000054579	1	1	46.78	52161	1.05366	1.35244	MECP2	MECP2|HGNC Symbol|methyl CpG binding protein 2 (Rett syndrome) [Source:HGNC Symbol;Acc:6990]|X|ENSBTAG00000047855|ENSBTAT00000063287	48848.8	51470	75045.8	101495
ENSBTAP00000019747	1	1	29.06	63024	1.05301	0.942863	UBQLN1	UBQLN1|UniProtKB Gene Name|Bos taurus ubiquilin 1 (UBQLN1), mRNA. [Source:RefSeq mRNA;Acc:NM_174628]|8|ENSBTAG00000014827|ENSBTAT00000019747	111242	117140	107712	101558
ENSBTAP00000008609	6	6	263.3	26771	1.05228	1.19649	HDGF	HDGF|UniProtKB Gene Name|Bos taurus hepatoma-derived growth factor (HDGF), mRNA. [Source:RefSeq mRNA;Acc:NM_175832]|3|ENSBTAG00000039793|ENSBTAT00000008609	1.96451e+06	2.06722e+06	1.06245e+06	1.27121e+06
ENSBTAP00000052927	1	1	57.94	20703	1.05131	0.818853	RAP2B	RAP2B|UniProtKB Gene Name|Bos taurus RAP2B, member of RAS oncogene family (RAP2B), mRNA. [Source:RefSeq mRNA;Acc:NM_001102531]|1|ENSBTAG00000016961|ENSBTAT00000022561	19582.5	20587.2	19798.9	16212.4
ENSBTAP00000017425	3	3	75.61	77418	1.05113	0.788794	STIM1	STIM1|HGNC Symbol|stromal interaction molecule 1 [Source:HGNC Symbol;Acc:11386]|15|ENSBTAG00000013109|ENSBTAT00000017425	81114.2	85262	89958.8	70959
ENSBTAP00000049910	4	4	230.03	22348	1.0495	1.19191	H1FX	H1FX|HGNC Symbol|H1 histone family, member X [Source:HGNC Symbol;Acc:4722]|22|ENSBTAG00000040116|ENSBTAT00000052022	761171	798852	446748	532482
ENSBTAP00000029060	1	1	34.86	12505	1.04863	1.01817	MIEN1	MIEN1|UniProtKB Gene Name|Bos taurus migration and invasion enhancer 1 (MIEN1), mRNA. [Source:RefSeq mRNA;Acc:NM_001075221]|19|ENSBTAG00000021802|ENSBTAT00000029060	113571	119095	99661.9	101473
ENSBTAP00000004615	10	9	708.22	23826	1.04863	0.83533	GSTP1	GSTP1|UniProtKB Gene Name|Bos taurus glutathione S-transferase pi 1 (GSTP1), mRNA. [Source:RefSeq mRNA;Acc:NM_177516]|29|ENSBTAG00000003548|ENSBTAT00000004615	3.62205e+06	3.79817e+06	4.19822e+06	3.5069e+06
ENSBTAP00000001668	3	3	91.37	32465	1.04753	1.56526	HNRPC	HNRPC|UniProtKB Gene Name|Bos taurus heterogeneous nuclear ribonucleoprotein C (C1/C2) (HNRNPC), mRNA. [Source:RefSeq mRNA;Acc:NM_001034395]|10|ENSBTAG00000011396|ENSBTAT00000001668	265715	278345	127564	199672
ENSBTAP00000041243	6	5	193.37	150966	1.04707	1.01509	KTN1	KTN1|HGNC Symbol|kinectin 1 (kinesin receptor) [Source:HGNC Symbol;Acc:6467]|10|ENSBTAG00000017713|ENSBTAT00000043690	178055	186436	165169	167661
ENSBTAP00000021386	4	2	179.19	20629	1.04444	0.789151	ARF4	ARF4|UniProtKB Gene Name|Bos taurus ADP-ribosylation factor 4 (ARF4), mRNA. [Source:RefSeq mRNA;Acc:NM_001034530]|22|ENSBTAG00000016069|ENSBTAT00000021386	223392	233320	200820	158477
ENSBTAP00000005832	10	10	288.01	226632	1.04406	0.853016	CKAP5	CKAP5|HGNC Symbol|cytoskeleton associated protein 5 [Source:HGNC Symbol;Acc:28959]|15|ENSBTAG00000004448|ENSBTAT00000005832	313082	326876	424402	362022
ENSBTAP00000002506	1	1	14.04	43148	1.04396	0.796064	RAD23B	RAD23B|UniProtKB Gene Name|Bos taurus RAD23 homolog B (S. cerevisiae) (RAD23B), mRNA. [Source:RefSeq mRNA;Acc:NM_001046310]|8|ENSBTAG00000001926|ENSBTAT00000002506	128694	134351	130434	103834
ENSBTAP00000034425	3	3	233.74	55631	1.04365	0.735961	ENDOD1	ENDOD1|UniProtKB Gene Name|Bos taurus endonuclease domain containing 1 (ENDOD1), mRNA. [Source:RefSeq mRNA;Acc:NM_001102519]|15|ENSBTAG00000024803|ENSBTAT00000034535	314784	328526	498324	366747
ENSBTAP00000028499	2	2	55.86	11192	1.0428	1.8712	S100A13	S100A13|UniProtKB Gene Name|Bos taurus S100 calcium binding protein A13 (S100A13), mRNA. [Source:RefSeq mRNA;Acc:NM_205800]|3|ENSBTAG00000021378|ENSBTAT00000028499	309971	323237	212377	397399
ENSBTAP00000007527	8	6	417.85	36041	1.04277	1.41002	HNRNPA2B1	HNRNPA2B1|UniProtKB Gene Name|Bos taurus heterogeneous nuclear ribonucleoprotein A2/B1 (HNRNPA2B1), mRNA. [Source:RefSeq mRNA;Acc:NM_001045975]|4|ENSBTAG00000005726|ENSBTAT00000007527	2.7077e+06	2.82351e+06	1.47293e+06	2.07687e+06
ENSBTAP00000008508	5	1	208.49	38048	1.04083	0.85574	GNB2	GNB2|UniProtKB Gene Name|Bos taurus guanine nucleotide binding protein (G protein), beta polypeptide 2 (GNB2), mRNA. [Source:RefSeq mRNA;Acc:NM_001097561]|25|ENSBTAG00000006495|ENSBTAT00000008508	109701	114179	126012	107834
ENSBTAP00000013112	8	8	269.43	137999	1.04055	1.05163	CAND1	CAND1|UniProtKB Gene Name|Bos taurus cullin-associated and neddylation-dissociated 1 (CAND1), mRNA. [Source:RefSeq mRNA;Acc:NM_001101173]|5|ENSBTAG00000009939|ENSBTAT00000013112	558891	581555	500534	526376
ENSBTAP00000013737;ENSBTAP00000028188;ENSBTAP00000035330;ENSBTAP00000001120;ENSBTAP00000002827	181	165	11642.3	228216	1.04042	1.02454	MYH9	MYH9|EntrezGene|Bos taurus myosin, heavy chain 9, non-muscle (MYH9), mRNA. [Source:RefSeq mRNA;Acc:NM_001192762]|5|ENSBTAG00000010402|ENSBTAT00000013737	1.96254e+08	2.04186e+08	2.43994e+08	2.49982e+08
ENSBTAP00000008650	11	11	474.52	98477	1.04035	0.989951	KPNB1	KPNB1|HGNC Symbol|karyopherin (importin) beta 1 [Source:HGNC Symbol;Acc:6400]|19|ENSBTAG00000006586|ENSBTAT00000008650	1.3996e+06	1.45607e+06	1.43144e+06	1.41706e+06
ENSBTAP00000019703	9	5	574.58	110677	1.03929	0.702584	ATP2A3	ATP2A3|HGNC Symbol|ATPase, Ca++ transporting, ubiquitous [Source:HGNC Symbol;Acc:813]|19|ENSBTAG00000014806|ENSBTAT00000019703	741030	770146	1.0472e+06	735745
ENSBTAP00000001071	1	1	33.55	34687	1.03801	1.32267	COPE	COPE|UniProtKB Gene Name|Bos taurus coatomer protein complex, subunit epsilon (COPE), mRNA. [Source:RefSeq mRNA;Acc:NM_176673]|7|ENSBTAG00000000810|ENSBTAT00000001071	42556.8	44174.4	30855.8	40812
ENSBTAP00000004398	3	2	54.58	88787	1.03729	1.40715	SF3A1	SF3A1|UniProtKB Gene Name|Bos taurus splicing factor 3a, subunit 1, 120kDa (SF3A1), mRNA. [Source:RefSeq mRNA;Acc:NM_001081510]|17|ENSBTAG00000003390|ENSBTAT00000004398	46572.8	48309.7	24237.9	34106.3
ENSBTAP00000005672	2	2	80.13	139796	1.03247	1.14858	COPA	COPA|UniProtKB Gene Name|Bos taurus coatomer protein complex, subunit alpha (COPA), mRNA. [Source:RefSeq mRNA;Acc:NM_001105645]|3|ENSBTAG00000004333|ENSBTAT00000005672	96174.1	99297.3	88783.1	101975
ENSBTAP00000044619;ENSBTAP00000044193	26	26	2010.4	58482	1.03197	1.11572	PKM2	PKM2|UniProtKB Gene Name|Bos taurus pyruvate kinase, muscle (PKM), mRNA. [Source:RefSeq mRNA;Acc:NM_001205727]|10|ENSBTAG00000001601|ENSBTAT00000047412	2.83501e+07	2.92565e+07	1.89343e+07	2.11254e+07
ENSBTAP00000040143	4	4	294.56	37010	1.03178	1.05814	FAM49B	FAM49B|UniProtKB Gene Name|Bos taurus family with sequence similarity 49, member B (FAM49B), mRNA. [Source:RefSeq mRNA;Acc:NM_001046047]|14|ENSBTAG00000020801|ENSBTAT00000040368	1.07151e+06	1.10556e+06	814785	862156
ENSBTAP00000024225;ENSBTAP00000043205	8	8	562.81	39824	1.03167	0.987674	WDR82P1	WDR82P1|UniProtKB Gene Name|Bos taurus WD repeat domain 82 (WDR82), mRNA. [Source:RefSeq mRNA;Acc:NM_001105459]|22|ENSBTAG00000002960|ENSBTAT00000024225	2.95232e+06	3.04583e+06	3.0409e+06	3.00342e+06
ENSBTAP00000002882	1	1	52.37	57178	1.0313	1.60689	PUF60	PUF60|HGNC Symbol|poly-U binding splicing factor 60KDa [Source:HGNC Symbol;Acc:17042]|14|ENSBTAG00000037493|ENSBTAT00000002882	51398.3	53006.8	26330.9	42310.9
ENSBTAP00000014659	1	1	13.03	22458	1.03118	0.754406	RBPMS2	RBPMS2|HGNC Symbol|RNA binding protein with multiple splicing 2 [Source:HGNC Symbol;Acc:19098]|10|ENSBTAG00000011037|ENSBTAT00000014659	46474	47922.8	18826.3	14202.6
ENSBTAP00000019338	4	4	108.56	104303	1.03101	1.20083	FAM129A	FAM129A|EntrezGene|Bos taurus family with sequence similarity 129, member A (FAM129A), mRNA. [Source:RefSeq mRNA;Acc:NM_001191282]|16|ENSBTAG00000014548|ENSBTAT00000019338	280656	289359	193283	232101
ENSBTAP00000012256	2	2	91.01	14217	1.03072	1.29086	PDCD5	PDCD5|UniProtKB Gene Name|Bos taurus programmed cell death 5 (PDCD5), mRNA. [Source:RefSeq mRNA;Acc:NM_001046024]|18|ENSBTAG00000009304|ENSBTAT00000012256	89156.6	91895.5	84245.3	108749
ENSBTAP00000013889	3	3	247.95	22232	1.03006	0.901909	BLVRB	BLVRB|UniProtKB Gene Name|Bos taurus biliverdin reductase B (flavin reductase (NADPH)) (BLVRB), mRNA. [Source:RefSeq mRNA;Acc:NM_174251]|18|ENSBTAG00000010508|ENSBTAT00000013889	1.31539e+06	1.35493e+06	888767	801587
ENSBTAP00000012773	5	5	255.01	27723	1.02974	1.19593	PSMA6	PSMA6|UniProtKB Gene Name|Bos taurus proteasome (prosome, macropain) subunit, alpha type, 6 (PSMA6), mRNA. [Source:RefSeq mRNA;Acc:NM_001045962]|21|ENSBTAG00000009683|ENSBTAT00000012773	980368	1.00953e+06	733916	877714
ENSBTAP00000013663	22	14	1082.62	68832	1.02871	1.2581	EZR	EZR|UniProtKB Gene Name|Bos taurus ezrin (EZR), mRNA. [Source:RefSeq mRNA;Acc:NM_174217]|9|ENSBTAG00000010347|ENSBTAT00000013663	6.2024e+06	6.38045e+06	4.0199e+06	5.05743e+06
ENSBTAP00000009229	2	2	76.34	52995	1.02839	0.673917	TOM1L1	TOM1L1|HGNC Symbol|target of myb1 (chicken)-like 1 [Source:HGNC Symbol;Acc:11983]|19|ENSBTAG00000007013|ENSBTAT00000009229	143699	147778	205475	138473
ENSBTAP00000024782	1	1	25.28	22555	1.02799	1.66222	ABHD14B	ABHD14B|UniProtKB Gene Name|Bos taurus abhydrolase domain containing 14B (ABHD14B), mRNA. [Source:RefSeq mRNA;Acc:NM_001105441]|22|ENSBTAG00000037377|ENSBTAT00000024782	59539.7	61206.1	32155.3	53449.1
ENSBTAP00000041451;ENSBTAP00000002228	5	5	217.69	21142	1.02622	1.11918	CDC42	CDC42|EntrezGene|Bos taurus cell division cycle 42 (GTP binding protein, 25kDa) (CDC42), mRNA. [Source:RefSeq mRNA;Acc:NM_001046332]|2|ENSBTAG00000001700|ENSBTAT00000043916	1.11768e+06	1.14699e+06	1.10434e+06	1.23595e+06
ENSBTAP00000026855	2	2	42.5	30856	1.0262	1.03721	GCLM	GCLM|UniProtKB Gene Name|Bos taurus glutamate-cysteine ligase, modifier subunit (GCLM), mRNA. [Source:RefSeq mRNA;Acc:NM_001038143]|3|ENSBTAG00000007842|ENSBTAT00000026855	200253	205500	220704	228915
ENSBTAP00000006430	5	5	250.62	137544	1.02562	0.926133	DCTN1	DCTN1|EntrezGene|Bos taurus dynactin 1 (DCTN1), mRNA. [Source:RefSeq mRNA;Acc:NM_001098934]|11|ENSBTAG00000004887|ENSBTAT00000006430	164100	168305	140125	129774
ENSBTAP00000008809	1	1	17.97	52557	1.02414	2.33907	EIF3E	EIF3E|UniProtKB Gene Name|Bos taurus eukaryotic translation initiation factor 3, subunit E (EIF3E), mRNA. [Source:RefSeq mRNA;Acc:NM_001034603]|14|ENSBTAG00000006702|ENSBTAT00000008809	17028.8	17440	5638.23	13188.2
ENSBTAP00000024373	1	1	29.36	53489	1.02321	1.39536	PPP2R2A	PPP2R2A|EntrezGene|Bos taurus protein phosphatase 2, regulatory subunit B, alpha (PPP2R2A), mRNA. [Source:RefSeq mRNA;Acc:NM_001191533]|8|ENSBTAG00000018317|ENSBTAT00000024373	64781.2	66284.7	49371.6	68891.3
ENSBTAP00000020825	8	8	402.13	95305	1.02262	1.02965	HSPA4	HSPA4|EntrezGene|Bos taurus heat shock 70kDa protein 4 (HSPA4), mRNA. [Source:RefSeq mRNA;Acc:NM_001114192]|7|ENSBTAG00000015683|ENSBTAT00000020825	599635	613201	560763	577392
ENSBTAP00000012872	9	8	332.4	45030	1.02206	1.21888	ACTR2	ACTR2|EntrezGene|Bos taurus ARP2 actin-related protein 2 homolog (yeast) (ACTR2), mRNA. [Source:RefSeq mRNA;Acc:NM_001102213]|11|ENSBTAG00000009761|ENSBTAT00000012872	2.47345e+06	2.528e+06	1.27817e+06	1.55793e+06
ENSBTAP00000025007	6	6	228.44	34548	1.0219	1.04713	CTSZ	CTSZ|HGNC Symbol|cathepsin Z [Source:HGNC Symbol;Acc:2547]|13|ENSBTAG00000018784|ENSBTAT00000025007	1.02017e+06	1.04251e+06	512559	536716
ENSBTAP00000017839;ENSBTAP00000007278;ENSBTAP00000014978	27	27	1631.02	47596	1.0213	0.843709	ENO1	||Bos taurus enolase 1, (alpha) (ENO1), mRNA. [Source:RefSeq mRNA;Acc:NM_174049]|16|ENSBTAG00000013411|ENSBTAT00000017839	5.1365e+07	5.24592e+07	5.46956e+07	4.61471e+07
ENSBTAP00000042551	10	8	590.88	33082	1.0213	0.943976	CAPZA1	CAPZA1|UniProtKB Gene Name|Bos taurus capping protein (actin filament) muscle Z-line, alpha 1 (CAPZA1), mRNA. [Source:RefSeq mRNA;Acc:NM_001083480]|3|ENSBTAG00000014295|ENSBTAT00000045136	4.66408e+06	4.76343e+06	4.03835e+06	3.81211e+06
ENSBTAP00000011521	15	15	811.97	57073	1.02035	0.877604	ALDH2	ALDH2|UniProtKB Gene Name|Bos taurus aldehyde dehydrogenase 2 family (mitochondrial) (ALDH2), mRNA. [Source:RefSeq mRNA;Acc:NM_001075367]|17|ENSBTAG00000008743|ENSBTAT00000011521	3.69351e+06	3.76868e+06	4.1278e+06	3.62257e+06
ENSBTAP00000039807	1	1	13.29	152146	1.01961	1.05527	PHLDB1	PHLDB1|UniProtKB Gene Name|Bos taurus pleckstrin homology-like domain, family B, member 1 (PHLDB1), mRNA. [Source:RefSeq mRNA;Acc:NM_001206042]|15|ENSBTAG00000016197|ENSBTAT00000040023	905852	923618	910223	960535
ENSBTAP00000028608	2	2	60.61	61033	1.01919	1.3195	PSMD3	PSMD3|UniProtKB Gene Name|Bos taurus proteasome (prosome, macropain) 26S subunit, non-ATPase, 3 (PSMD3), mRNA. [Source:RefSeq mRNA;Acc:NM_001045900]|19|ENSBTAG00000021461|ENSBTAT00000028608	113326	115500	87993	116107
ENSBTAP00000003662	13	13	716.4	60698	1.01891	1.21589	TCP1	TCP1|EntrezGene|Bos taurus t-complex 1 (TCP1), mRNA. [Source:RefSeq mRNA;Acc:NM_001038086]|9|ENSBTAG00000002829|ENSBTAT00000003662	1.69023e+06	1.72219e+06	1.47914e+06	1.79846e+06
ENSBTAP00000004410;ENSBTAP00000038110	6	6	257.24	44112	1.01868	1.1421	ACTR3	ACTR3|UniProtKB Gene Name|Bos taurus ARP3 actin-related protein 3 homolog (yeast) (ACTR3), mRNA. [Source:RefSeq mRNA;Acc:NM_174226]|2|ENSBTAG00000003401|ENSBTAT00000004410	1.91478e+06	1.95054e+06	1.08552e+06	1.23977e+06
ENSBTAP00000002326	7	2	304.09	11695	1.01768	1.40553	RPLP2	RPLP2|UniProtKB Gene Name|Bos taurus ribosomal protein, large, P2 (RPLP2), mRNA. [Source:RefSeq mRNA;Acc:NM_174788]|29|ENSBTAG00000001777|ENSBTAT00000002326	526311	535617	297636	418338
ENSBTAP00000045063	3	3	68.08	109226	1.01732	0.711354	SLFN14	SLFN14|HGNC Symbol|schlafen family member 14 [Source:HGNC Symbol;Acc:32689]|19|ENSBTAG00000039206|ENSBTAT00000047910	122081	124195	139095	98946.1
ENSBTAP00000020950	5	5	330.84	36944	1.01686	1.09511	RCN2	RCN2|UniProtKB Gene Name|Bos taurus reticulocalbin 2, EF-hand calcium binding domain (RCN2), mRNA. [Source:RefSeq mRNA;Acc:NM_001075579]|21|ENSBTAG00000015780|ENSBTAT00000020950	189456	192651	407915	446711
ENSBTAP00000048950;ENSBTAP00000014537	5	4	285.11	28937	1.01683	0.906747	CLIC4	CLIC4|UniProtKB Gene Name|Bos taurus chloride intracellular channel 4 (CLIC4), mRNA. [Source:RefSeq mRNA;Acc:NM_001080218]|2|ENSBTAG00000009470|ENSBTAT00000054397	611212	621497	549451	498213
ENSBTAP00000016137	4	4	96.51	124814	1.01654	0.804394	CP	CP|HGNC Symbol|ceruloplasmin (ferroxidase) [Source:HGNC Symbol;Acc:2295]|1|ENSBTAG00000012164|ENSBTAT00000016137	115955	117872	154247	124075
ENSBTAP00000011762	2	2	168.69	17431	1.01605	1.33236	PFDN5	PFDN5|UniProtKB Gene Name|Bos taurus prefoldin subunit 5 (PFDN5), mRNA. [Source:RefSeq mRNA;Acc:NM_174732]|5|ENSBTAG00000008935|ENSBTAT00000011762	131184	133289	80674.2	107487
ENSBTAP00000016937	1	1	33.53	21172	1.01323	1.01308	UBE2M	UBE2M|UniProtKB Gene Name|Bos taurus ubiquitin-conjugating enzyme E2M (UBE2M), mRNA. [Source:RefSeq mRNA;Acc:NM_001083503]|18|ENSBTAG00000012744|ENSBTAT00000016937	37934.9	38437	39740.8	40260.6
ENSBTAP00000023150	1	1	18.36	58378	1.01286	5.05223	KPNA4	KPNA4|UniProtKB Gene Name|Bos taurus karyopherin alpha 4 (importin alpha 3) (KPNA4), mRNA. [Source:RefSeq mRNA;Acc:NM_001159316]|1|ENSBTAG00000017416|ENSBTAT00000023150	12567.6	12729.3	6373.88	32202.3
ENSBTAP00000001895	1	1	38.38	9098	1.01155	1.06965	ABRACL	ABRACL|UniProtKB Gene Name|Bos taurus ABRA C-terminal like (ABRACL), mRNA. [Source:RefSeq mRNA;Acc:NM_001166561]|9|ENSBTAG00000001446|ENSBTAT00000001895	35842.9	36256.9	25968.1	27776.8
ENSBTAP00000026878	1	1	13.57	61656	1.01135	1.09821	AAAS	AAAS|UniProtKB Gene Name|Bos taurus achalasia, adrenocortical insufficiency, alacrimia (AAAS), mRNA. [Source:RefSeq mRNA;Acc:NM_001075269]|5|ENSBTAG00000020179|ENSBTAT00000026878	169376	171298	66417.2	72940.2
ENSBTAP00000022411	15	8	1054.74	28179	1.01129	1.04444	YWHAB	YWHAB|UniProtKB Gene Name|Bos taurus tyrosine 3-monooxygenase/tryptophan 5-monooxygenase activation protein, beta polypeptide (YWHAB), mRNA. [Source:RefSeq mRNA;Acc:NM_174794]|13|ENSBTAG00000016846|ENSBTAT00000022411	1.24877e+07	1.26287e+07	1.0585e+07	1.10554e+07
ENSBTAP00000036036	3	3	133.73	40868	1.01091	1.20775	CDC37	CDC37|HGNC Symbol|cell division cycle 37 [Source:HGNC Symbol;Acc:1735]|7|ENSBTAG00000011699|ENSBTAT00000036173	333750	337390	121067	146219
ENSBTAP00000018741	9	8	395.93	51163	1.0092	0.856505	IDH2	IDH2|UniProtKB Gene Name|Bos taurus isocitrate dehydrogenase 2 (NADP+), mitochondrial (IDH2), mRNA. [Source:RefSeq mRNA;Acc:NM_175790]|21|ENSBTAG00000014093|ENSBTAT00000018741	730862	737582	767123	657044
ENSBTAP00000043489	2	2	45.84	34726	1.00905	1.36276	PSMD14	PSMD14|UniProtKB Gene Name|Bos taurus proteasome (prosome, macropain) 26S subunit, non-ATPase, 14 (PSMD14), mRNA. [Source:RefSeq mRNA;Acc:NM_001076067]|2|ENSBTAG00000021691|ENSBTAT00000046166	75730.2	76415.8	64555.9	87974.1
ENSBTAP00000022552	2	2	57.66	47277	1.00828	0.767739	WDFY1	WDFY1|UniProtKB Gene Name|Bos taurus WD repeat and FYVE domain containing 1 (WDFY1), mRNA. [Source:RefSeq mRNA;Acc:NM_001046542]|2|ENSBTAG00000016951|ENSBTAT00000022552	93696.2	94472.2	117652	90326.1
ENSBTAP00000009961	1	1	35.55	13390	1.00763	0.993446	ATP6V1F	ATP6V1F|UniProtKB Gene Name|Bos taurus ATPase, H+ transporting, lysosomal 14kDa, V1 subunit F (ATP6V1F), mRNA. [Source:RefSeq mRNA;Acc:NM_001045869]|4|ENSBTAG00000007572|ENSBTAT00000009961	23509.1	23688.4	23458.6	23304.8
ENSBTAP00000052689	16	14	774.4	66371	1.0076	1.31817	LMNB1	LMNB1|EntrezGene|lamin-B1 [Source:RefSeq peptide;Acc:NP_001096765]|7|ENSBTAG00000002882|ENSBTAT00000052423	3.28249e+06	3.30743e+06	1.97767e+06	2.60691e+06
ENSBTAP00000014552	3	3	74.39	13884	1.00605	0.976868	HINT1	HINT1|UniProtKB Gene Name|Bos taurus histidine triad nucleotide binding protein 1 (HINT1), mRNA. [Source:RefSeq mRNA;Acc:NM_175812]|7|ENSBTAG00000010959|ENSBTAT00000014552	677009	681105	631671	617059
ENSBTAP00000016884	1	1	17.26	20923	1.00594	0.809063	GLO1	GLO1|UniProtKB Gene Name|Bos taurus glyoxalase I (GLO1), mRNA. [Source:RefSeq mRNA;Acc:NM_001083496]|23|ENSBTAG00000012703|ENSBTAT00000016884	158738	159681	113823	92090.3
ENSBTAP00000003259	9	9	494.13	59767	1.00552	0.851787	ATP5A1	ATP5A1|HGNC Symbol|ATP synthase, H+ transporting, mitochondrial F1 complex, alpha subunit 1, cardiac muscle [Source:HGNC Symbol;Acc:823]|24|ENSBTAG00000002507|ENSBTAT00000003259	1.95866e+06	1.96946e+06	2.58394e+06	2.20096e+06
ENSBTAP00000008754	1	1	35.29	28845	1.00459	1.17368	ERP29	ERP29|UniProtKB Gene Name|Bos taurus endoplasmic reticulum protein 29 (ERP29), mRNA. [Source:RefSeq mRNA;Acc:NM_001076271]|17|ENSBTAG00000006665|ENSBTAT00000008754	32518.8	32668	34483.5	40472.6
ENSBTAP00000007028;ENSBTAP00000055935	2	2	82.26	20761	1.004	1.99417	ARPC3	ARPC3|UniProtKB Gene Name|Bos taurus actin related protein 2/3 complex, subunit 3, 21kDa (ARPC3), mRNA. [Source:RefSeq mRNA;Acc:NM_001034271]|17|ENSBTAG00000005345|ENSBTAT00000007028	462720	464572	192613	384104
ENSBTAP00000002626;ENSBTAP00000055696	2	2	40.49	34551	1.00343	2.67876	RPL5	RPL5|UniProtKB Gene Name|60S ribosomal protein L5 [Source:UniProtKB/Swiss-Prot;Acc:Q58DW5]|3|ENSBTAG00000002026|ENSBTAT00000002626	94210.8	94533.6	33643	90121.4
ENSBTAP00000043467	1	1	17.7	8364	1.00269	0.601242	RTN3	||Bos taurus reticulon 3 (RTN3), mRNA. [Source:RefSeq mRNA;Acc:NM_182657]|29|ENSBTAG00000045971|ENSBTAT00000046142	91962.6	92210.3	76804	46177.8
ENSBTAP00000012508	1	1	50	46987	1.00268	0.802578	NAGA	NAGA|UniProtKB Gene Name|alpha-N-acetylgalactosaminidase precursor [Source:RefSeq peptide;Acc:NP_001039814]|5|ENSBTAG00000009506|ENSBTAT00000012508	58977.1	59135	53867.8	43233.1
ENSBTAP00000011858	1	1	14.76	231502	1.00243	2.32039	PRR14L	PRR14L|HGNC Symbol|proline rich 14-like [Source:HGNC Symbol;Acc:28738]|17|ENSBTAG00000009006|ENSBTAT00000011858	25401	25462.6	22647.6	52551.4
ENSBTAP00000011751	3	1	69.33	63887	1.00195	2.32195	FUBP1	FUBP1|EntrezGene|Bos taurus far upstream element (FUSE) binding protein 1 (FUBP1), mRNA. [Source:RefSeq mRNA;Acc:NM_001076846]|3|ENSBTAG00000008926|ENSBTAT00000011751	54905.2	55012.2	21382.9	49650
ENSBTAP00000025094;ENSBTAP00000035214	8	8	360.89	57819	1.00151	1.02098	HARS	HARS|UniProtKB Gene Name|Bos taurus histidyl-tRNA synthetase (HARS), mRNA. [Source:RefSeq mRNA;Acc:NM_001046066]|7|ENSBTAG00000018847|ENSBTAT00000025094	671879	672894	700317	715009
ENSBTAP00000020081	2	2	54.12	34420	1.00099	0.821555	SGTA	SGTA|UniProtKB Gene Name|Bos taurus small glutamine-rich tetratricopeptide repeat (TPR)-containing, alpha (SGTA), mRNA. [Source:RefSeq mRNA;Acc:NM_001038030]|7|ENSBTAG00000015090|ENSBTAT00000020081	114611	114725	80384.6	66040.4
ENSBTAP00000013787	9	9	897.22	39587	1.00059	1.06208	LSP1	LSP1|UniProtKB Gene Name|Bos taurus lymphocyte-specific protein 1 (LSP1), mRNA. [Source:RefSeq mRNA;Acc:NM_001075374]|29|ENSBTAG00000010447|ENSBTAT00000013787	6.69696e+06	6.70094e+06	4.24701e+06	4.51066e+06
ENSBTAP00000022258	20	19	889.43	120625	0.999821	0.859217	ACLY	ACLY|UniProtKB Gene Name|Bos taurus ATP citrate lyase (ACLY), mRNA. [Source:RefSeq mRNA;Acc:NM_001037457]|19|ENSBTAG00000016740|ENSBTAT00000022258	1.95432e+06	1.95397e+06	2.24144e+06	1.92588e+06
ENSBTAP00000019758	7	7	271.84	35446	0.999809	0.811669	SPARC	SPARC|UniProtKB Gene Name|Bos taurus secreted protein, acidic, cysteine-rich (osteonectin) (SPARC), mRNA. [Source:RefSeq mRNA;Acc:NM_174464]|7|ENSBTAG00000014835|ENSBTAT00000019758	177674	177640	2.39827e+06	1.9466e+06
ENSBTAP00000056127	1	1	26.76	29294	0.999622	1.12338	RCN1	RCN1|UniProtKB Gene Name|Bos taurus reticulocalbin 1, EF-hand calcium binding domain (RCN1), mRNA. [Source:RefSeq mRNA;Acc:NM_001103221]|15|ENSBTAG00000047362|ENSBTAT00000063521	11967.8	11963.3	14704.9	16519.3
ENSBTAP00000021671	2	2	47.96	25246	0.999102	1.11053	MOB1B	MOB1B|HGNC Symbol|MOB kinase activator 1B [Source:HGNC Symbol;Acc:29801]|6|ENSBTAG00000016290|ENSBTAT00000021671	174747	174590	141448	157081
ENSBTAP00000002948	1	1	24.86	12839	0.998513	12.7073	EIF1	EIF1|UniProtKB Gene Name|Bos taurus eukaryotic translation initiation factor 1 (EIF1), mRNA. [Source:RefSeq mRNA;Acc:NM_001014884]|19|ENSBTAG00000002282|ENSBTAT00000002948	31066.6	31020.4	876.371	11136.3
ENSBTAP00000010451	5	5	265.77	99178	0.997662	2.08881	MVP	MVP|EntrezGene|Bos taurus major vault protein (MVP), mRNA. [Source:RefSeq mRNA;Acc:NM_001035317]|25|ENSBTAG00000007952|ENSBTAT00000010451	474829	473719	107755	225079
ENSBTAP00000008068	1	1	37	10983	0.99758	1.20431	DYNLRB1	DYNLRB1|UniProtKB Gene Name|Bos taurus dynein, light chain, roadblock-type 1 (DYNLRB1), mRNA. [Source:RefSeq mRNA;Acc:NM_001034442]|13|ENSBTAG00000006134|ENSBTAT00000008068	73606.8	73428.7	48851.5	58832.1
ENSBTAP00000018032	1	1	18.46	44198	0.997053	1.04808	TSG101	TSG101|UniProtKB Gene Name|Bos taurus tumor susceptibility gene 101 (TSG101), mRNA. [Source:RefSeq mRNA;Acc:NM_001097995]|29|ENSBTAG00000013563|ENSBTAT00000018032	52689.3	52534	52784.4	55322.1
ENSBTAP00000025683	6	6	150.87	56198	0.997049	0.911263	PACSIN2	PACSIN2|UniProtKB Gene Name|Bos taurus protein kinase C and casein kinase substrate in neurons 2 (PACSIN2), mRNA. [Source:RefSeq mRNA;Acc:NM_001046468]|5|ENSBTAG00000019290|ENSBTAT00000025683	348216	347188	361760	329658
ENSBTAP00000010230	1	1	69.18	41942	0.996952	0.903864	CAMK1	CAMK1|UniProtKB Gene Name|Bos taurus calcium/calmodulin-dependent protein kinase I (CAMK1), mRNA. [Source:RefSeq mRNA;Acc:NM_001076868]|22|ENSBTAG00000007780|ENSBTAT00000010230	42053.6	41925.5	64783.3	58555.2
ENSBTAP00000002666	1	1	36.46	19170	0.996291	1.86618	RPL19	RPL19|UniProtKB Gene Name|Bos taurus ribosomal protein L19 (RPL19), mRNA. [Source:RefSeq mRNA;Acc:NM_001040516]|19|ENSBTAG00000002060|ENSBTAT00000002666	53806.7	53607.1	16138	30116.4
ENSBTAP00000026118	11	8	531.35	36985	0.995096	1.20917	LDHB	LDHB|UniProtKB Gene Name|Bos taurus lactate dehydrogenase B (LDHB), mRNA. [Source:RefSeq mRNA;Acc:NM_174100]|5|ENSBTAG00000019603|ENSBTAT00000026118	6.91397e+06	6.88006e+06	4.79344e+06	5.79607e+06
ENSBTAP00000040254	7	7	265.25	34443	0.993935	0.667296	CYB5R3	CYB5R3|EntrezGene|Bos taurus cytochrome b5 reductase 3 (CYB5R3), mRNA. [Source:RefSeq mRNA;Acc:NM_001103250]|5|ENSBTAG00000016516|ENSBTAT00000042618	1.44004e+06	1.43131e+06	1.8146e+06	1.21088e+06
ENSBTAP00000011789	4	4	213.35	23504	0.993868	1.14946	PSMB9	PSMB9|UniProtKB Gene Name|Bos taurus proteasome (prosome, macropain) subunit, beta type, 9 (large multifunctional peptidase 2) (PSMB9), mRNA. [Source:RefSeq mRNA;Acc:NM_001034388]|23|ENSBTAG00000008954|ENSBTAT00000011789	915040	909429	639486	735066
ENSBTAP00000012170	1	1	30.23	20578	0.993466	0.765864	RAC1	RAC1|UniProtKB Gene Name|Ras-related C3 botulinum toxin substrate 1 [Source:UniProtKB/Swiss-Prot;Acc:P62998]|25|ENSBTAG00000009233|ENSBTAT00000012170	305590	303593	269650	206515
ENSBTAP00000026358	16	16	1033.52	26901	0.993445	1.02124	TPI1	TPI1|UniProtKB Gene Name|Bos taurus triosephosphate isomerase 1 (TPI1), mRNA. [Source:RefSeq mRNA;Acc:NM_001013589]|5|ENSBTAG00000019782|ENSBTAT00000026358	1.28206e+07	1.27366e+07	9.78129e+06	9.989e+06
ENSBTAP00000042480;ENSBTAP00000055847;ENSBTAP00000009261	5	3	211.92	46322	0.992533	0.912557	SERPINA3-1	SERPINA3-1|UniProtKB Gene Name|Bos taurus serpin peptidase inhibitor, clade A (alpha-1 antiproteinase, antitrypsin), member 3 (SERPINA3-1), mRNA. [Source:RefSeq mRNA;Acc:NM_174768]|21|ENSBTAG00000046540|ENSBTAT00000045063	201902	200395	373590	340922
ENSBTAP00000011888	1	1	56.23	87327	0.991979	0.671538	NOX5	NOX5|UniProtKB Gene Name|Bos taurus NADPH oxidase, EF-hand calcium binding domain 5 (NOX5), mRNA. [Source:RefSeq mRNA;Acc:NM_001101137]|10|ENSBTAG00000009030|ENSBTAT00000011888	31046.5	30797.5	41376.6	27786
ENSBTAP00000003434	2	2	104.82	20993	0.991559	0.547929	LOC781439	||Uncharacterized protein [Source:UniProtKB/TrEMBL;Acc:F1N7H2]|5|ENSBTAG00000032899|ENSBTAT00000003434	208859	207096	281138	154044
ENSBTAP00000007524	8	7	231.71	76782	0.988914	0.854518	SYTL4	SYTL4|HGNC Symbol|synaptotagmin-like 4 [Source:HGNC Symbol;Acc:15588]|X|ENSBTAG00000005724|ENSBTAT00000007524	415979	411367	493179	421430
ENSBTAP00000019970;ENSBTAP00000025744	36	36	2140	89931	0.988864	0.988692	VCP	VCP|EntrezGene|Bos taurus valosin containing protein (VCP), mRNA. [Source:RefSeq mRNA;Acc:NM_001034294]|8|ENSBTAG00000015000|ENSBTAT00000019970	1.31215e+07	1.29754e+07	1.30612e+07	1.29135e+07
ENSBTAP00000001568	5	4	159.22	50949	0.988649	0.849832	CDC10	CDC10|UniProtKB Gene Name|Bos taurus septin 7 (SEPT7), mRNA. [Source:RefSeq mRNA;Acc:NM_001001168]|4|ENSBTAG00000001182|ENSBTAT00000001568	1.10122e+06	1.08872e+06	1.16914e+06	993576
ENSBTAP00000033996	4	4	144.43	54868	0.987668	1.17408	ALDH9A1	ALDH9A1|HGNC Symbol|aldehyde dehydrogenase 9 family, member A1 [Source:HGNC Symbol;Acc:412]|3|ENSBTAG00000017852|ENSBTAT00000034095	524255	517790	519678	610145
ENSBTAP00000007817	1	1	43.66	66059	0.987284	0.640653	CSE1L	CSE1L|UniProtKB Gene Name|Bos taurus CSE1 chromosome segregation 1-like (yeast) (CSE1L), mRNA. [Source:RefSeq mRNA;Acc:NM_001014933]|13|ENSBTAG00000005957|ENSBTAT00000007817	23583.3	23283.4	33193.4	21265.4
ENSBTAP00000017988	11	11	630.56	53613	0.986919	0.927519	PGD	PGD|UniProtKB Gene Name|Bos taurus phosphogluconate dehydrogenase (PGD), mRNA. [Source:RefSeq mRNA;Acc:NM_001143738]|16|ENSBTAG00000013527|ENSBTAT00000017988	7.62628e+06	7.52652e+06	5.66592e+06	5.25525e+06
ENSBTAP00000021256	9	9	558.78	39240	0.986859	1.62518	ANXA1	ANXA1|EntrezGene|Bos taurus annexin A1 (ANXA1), mRNA. [Source:RefSeq mRNA;Acc:NM_175784]|8|ENSBTAG00000015978|ENSBTAT00000021256	8.28581e+06	8.17693e+06	1.1964e+06	1.94437e+06
ENSBTAP00000006465;ENSBTAP00000050051	13	13	828.55	15219	0.985538	0.863096	PFN1	PFN1|UniProtKB Gene Name|Bos taurus profilin 1 (PFN1), mRNA. [Source:RefSeq mRNA;Acc:NM_001015592]|19|ENSBTAG00000004915|ENSBTAT00000006465	4.97754e+07	4.90555e+07	5.01117e+07	4.32512e+07
ENSBTAP00000016661;ENSBTAP00000001093	3	2	90.68	105830	0.984063	0.712928	TAOK3	TAOK3|HGNC Symbol|TAO kinase 3 [Source:HGNC Symbol;Acc:18133]|17|ENSBTAG00000012550|ENSBTAT00000016661	136759	134579	157613	112367
ENSBTAP00000023612	3	2	158.3	68536	0.98355	1.00211	EWSR1	EWSR1|UniProtKB Gene Name|Bos taurus Ewing sarcoma breakpoint region 1 (EWSR1), mRNA. [Source:RefSeq mRNA;Acc:NM_001109800]|17|ENSBTAG00000017755|ENSBTAT00000023612	281686	277052	131210	131487
ENSBTAP00000010469	4	4	137.66	19768	0.983353	1.47206	ARPC4	ARPC4|UniProtKB Gene Name|Bos taurus actin related protein 2/3 complex, subunit 4, 20kDa (ARPC4), mRNA. [Source:RefSeq mRNA;Acc:NM_001076163]|22|ENSBTAG00000007964|ENSBTAT00000010469	1.08701e+06	1.06891e+06	457681	673733
ENSBTAP00000024092;ENSBTAP00000002300	15	14	647.23	48120	0.983134	1.01338	AHCY	AHCY|UniProtKB Gene Name|Bos taurus adenosylhomocysteinase (AHCY), mRNA. [Source:RefSeq mRNA;Acc:NM_001034315]|13|ENSBTAG00000018101|ENSBTAT00000024092	4.47105e+06	4.39564e+06	3.52986e+06	3.57709e+06
ENSBTAP00000024015	3	3	228.33	29423	0.982535	1.17263	PSMB10	PSMB10|UniProtKB Gene Name|Bos taurus proteasome (prosome, macropain) subunit, beta type, 10 (PSMB10), mRNA. [Source:RefSeq mRNA;Acc:NM_001034040]|18|ENSBTAG00000018040|ENSBTAT00000024015	454569	446630	302793	355065
ENSBTAP00000023573	2	2	99.27	222990	0.982007	0.777075	F5	F5|HGNC Symbol|coagulation factor V (proaccelerin, labile factor) [Source:HGNC Symbol;Acc:3542]|16|ENSBTAG00000017722|ENSBTAT00000023573	142897	140326	152787	118727
ENSBTAP00000015874	4	4	329.41	12787	0.981972	0.685496	PF4	PF4|EntrezGene|Bos taurus platelet factor 4 (PF4), mRNA. [Source:RefSeq mRNA;Acc:NM_001101062]|6|ENSBTAG00000011961|ENSBTAT00000015874	2.55884e+07	2.51271e+07	4.01594e+07	2.75291e+07
ENSBTAP00000013707;ENSBTAP00000008670	9	9	294.62	34442	0.981837	1.30261	ARPC2	ARPC2|UniProtKB Gene Name|Bos taurus actin related protein 2/3 complex, subunit 2, 34kDa (ARPC2), mRNA. [Source:RefSeq mRNA;Acc:NM_001034713]|2|ENSBTAG00000010386|ENSBTAT00000013707	1.89275e+06	1.85837e+06	792525	1.03235e+06
ENSBTAP00000015944	1	1	17.88	15320	0.981466	0.569846	CYB5A	CYB5A|UniProtKB Gene Name|Bos taurus cytochrome b5 type A (microsomal) (CYB5A), mRNA. [Source:RefSeq mRNA;Acc:NM_174033]|24|ENSBTAG00000012012|ENSBTAT00000015944	37990.2	37286.1	57917.5	33004.1
ENSBTAP00000011202	2	2	49.94	26937	0.981161	1.25896	ALYREF	ALYREF|UniProtKB Gene Name|Bos taurus THO complex 4 (ALYREF), mRNA. [Source:RefSeq mRNA;Acc:NM_001035417]|19|ENSBTAG00000008498|ENSBTAT00000011202	153930	151030	82438.6	103787
ENSBTAP00000049826	1	1	26.34	14884	0.980956	2.07121	LOC619131	||40S ribosomal protein S15a [Source:UniProtKB/TrEMBL;Acc:H9KUV3]|18|ENSBTAG00000047787|ENSBTAT00000049216	52787	51781.8	24705.5	51170.4
ENSBTAP00000012094	7	7	478.08	66828	0.98074	0.935052	STXBP2	STXBP2|HGNC Symbol|syntaxin binding protein 2 [Source:HGNC Symbol;Acc:11445]|7|ENSBTAG00000009178|ENSBTAT00000012094	681640	668511	683055	638692
ENSBTAP00000017251	1	1	55.97	32113	0.980143	0.395251	VDAC2	VDAC2|UniProtKB Gene Name|Bos taurus voltage-dependent anion channel 2 (VDAC2), mRNA. [Source:RefSeq mRNA;Acc:NM_174486]|28|ENSBTAG00000012975|ENSBTAT00000017251	95688.7	93788.7	94316.4	37278.7
ENSBTAP00000006760;ENSBTAP00000023541	6	6	314.25	28023	0.979897	1.50416	PSMA7	PSMA7|UniProtKB Gene Name|Bos taurus proteasome (prosome, macropain) subunit, alpha type, 7 (PSMA7), mRNA. [Source:RefSeq mRNA;Acc:NM_001034233]|13|ENSBTAG00000005127|ENSBTAT00000006760	3.08743e+06	3.02536e+06	2.30369e+06	3.46513e+06
ENSBTAP00000006190	1	1	31.52	10457	0.979808	0.821184	DYNLL2	DYNLL2|UniProtKB Gene Name|Bos taurus dynein, light chain, LC8-type 2 (DYNLL2), mRNA. [Source:RefSeq mRNA;Acc:NM_001113303]|19|ENSBTAG00000025313|ENSBTAT00000006190	176319	172759	124794	102479
ENSBTAP00000027359	5	5	286.75	22051	0.979489	1.56833	PYCARD	PYCARD|HGNC Symbol|PYD and CARD domain containing [Source:HGNC Symbol;Acc:16608]|25|ENSBTAG00000020535|ENSBTAT00000027359	208459	204183	132491	207791
ENSBTAP00000003472;ENSBTAP00000051545	12	12	596.37	86920	0.979367	0.779606	PFKP	PFKP|HGNC Symbol|phosphofructokinase, platelet [Source:HGNC Symbol;Acc:8878]|13|ENSBTAG00000002683|ENSBTAT00000003472	2.52977e+06	2.47757e+06	2.76109e+06	2.15256e+06
ENSBTAP00000001045	5	5	198.01	41533	0.979304	0.904859	PPP1R7	PPP1R7|UniProtKB Gene Name|Bos taurus protein phosphatase 1, regulatory subunit 7 (PPP1R7), mRNA. [Source:RefSeq mRNA;Acc:NM_001034238]|3|ENSBTAG00000000789|ENSBTAT00000001045	308623	302236	326951	295845
ENSBTAP00000017663	2	2	73.3	28647	0.978601	0.897927	NECAP2	NECAP2|UniProtKB Gene Name|Bos taurus NECAP endocytosis associated 2 (NECAP2), mRNA. [Source:RefSeq mRNA;Acc:NM_001015562]|2|ENSBTAG00000013282|ENSBTAT00000017663	115283	112816	178991	160721
ENSBTAP00000024299	1	1	14.54	25461	0.978418	1.1687	SRSF2	SRSF2|UniProtKB Gene Name|Bos taurus serine/arginine-rich splicing factor 2 (SRSF2), mRNA. [Source:RefSeq mRNA;Acc:NM_001034318]|19|ENSBTAG00000018258|ENSBTAT00000024299	60902.3	59587.9	32796.9	38329.6
ENSBTAP00000008372;ENSBTAP00000014560	21	4	1185.9	50255	0.977484	0.891298	TUBB4B	TUBB4B|UniProtKB Gene Name|Bos taurus tubulin, beta 2C (TUBB4B), mRNA. [Source:RefSeq mRNA;Acc:NM_001034663]|11|ENSBTAG00000025274|ENSBTAT00000008372	4.66556e+06	4.56051e+06	5.23113e+06	4.66249e+06
ENSBTAP00000011678	10	10	417.41	82782	0.977215	0.823172	CAPN1	CAPN1|UniProtKB Gene Name|Bos taurus calpain 1, (mu/I) large subunit (CAPN1), mRNA. [Source:RefSeq mRNA;Acc:NM_174259]|29|ENSBTAG00000010230|ENSBTAT00000011678	1.58238e+06	1.54632e+06	1.36712e+06	1.12537e+06
ENSBTAP00000028602;ENSBTAP00000020036	9	9	594.77	18792	0.976133	0.953206	CFL1	CFL1|UniProtKB Gene Name|Bos taurus cofilin 1 (non-muscle) (CFL1), mRNA. [Source:RefSeq mRNA;Acc:NM_001015655]|29|ENSBTAG00000021455|ENSBTAT00000028602	2.43977e+07	2.38154e+07	2.54151e+07	2.42259e+07
ENSBTAP00000037526	2	2	56.45	23564	0.975892	1.10317	ATP6V1E1	ATP6V1E1|UniProtKB Gene Name|Bos taurus ATPase, H+ transporting, lysosomal 31kDa, V1 subunit E1 (ATP6V1E1), mRNA. [Source:RefSeq mRNA;Acc:NM_174810]|5|ENSBTAG00000014238|ENSBTAT00000037702	79074.1	77167.8	97521.6	107583
ENSBTAP00000029553	1	1	34.18	120649	0.975795	1.3087	MYO1C	MYO1C|UniProtKB Gene Name|Bos taurus myosin IC (MYO1C), mRNA. [Source:RefSeq mRNA;Acc:NM_174396]|19|ENSBTAG00000001332|ENSBTAT00000029554	60964	59488.3	53562.3	70096.9
ENSBTAP00000010912;ENSBTAP00000050719	2	2	39.33	13273	0.975507	1.36454	SNRPD1	SNRPD1|UniProtKB Gene Name|Bos taurus small nuclear ribonucleoprotein D1 polypeptide 16kDa (SNRPD1), mRNA. [Source:RefSeq mRNA;Acc:NM_001035065]|24|ENSBTAG00000008292|ENSBTAT00000010912	165761	161701	102993	140538
ENSBTAP00000003425	5	5	231.28	21239	0.974397	0.721385	RGS10	RGS10|UniProtKB Gene Name|Bos taurus regulator of G-protein signaling 10 (RGS10), mRNA. [Source:RefSeq mRNA;Acc:NM_001046540]|26|ENSBTAG00000002647|ENSBTAT00000003425	347350	338457	208877	150681
ENSBTAP00000028053;ENSBTAP00000055554	3	3	132.04	42701	0.974045	1.02488	ACTR1A	ACTR1A|UniProtKB Gene Name|Bos taurus ARP1 actin-related protein 1 homolog A, centractin alpha (yeast) (ACTR1A), mRNA. [Source:RefSeq mRNA;Acc:NM_001193248]|26|ENSBTAG00000021067|ENSBTAT00000028053	582702	567578	546983	560590
ENSBTAP00000002642	2	2	105.81	23464	0.973645	1.97316	RPL14	RPL14|UniProtKB Gene Name|Bos taurus ribosomal protein L14 (RPL14), mRNA. [Source:RefSeq mRNA;Acc:NM_001034674]|22|ENSBTAG00000002038|ENSBTAT00000002642	232059	225943	89076.2	175762
ENSBTAP00000014744	1	1	35.22	22438	0.973304	0.644886	RTN4	RTN4|UniProtKB Gene Name|Bos taurus reticulon 4 (RTN4), transcript variant 2, mRNA. [Source:RefSeq mRNA;Acc:NM_001113221]|11|ENSBTAG00000011104|ENSBTAT00000014744	28757.4	27989.7	17678	11400.3
ENSBTAP00000023725	2	2	48.04	32777	0.972578	0.521258	F11R	F11R|UniProtKB Gene Name|Bos taurus F11 receptor (F11R), mRNA. [Source:RefSeq mRNA;Acc:NM_174095]|3|ENSBTAG00000017846|ENSBTAT00000023725	139836	136001	180426	94048.7
ENSBTAP00000012836	2	2	53.47	16804	0.972048	0.607414	LTC4S	LTC4S|UniProtKB Gene Name|Bos taurus leukotriene C4 synthase (LTC4S), mRNA. [Source:RefSeq mRNA;Acc:NM_001046098]|7|ENSBTAG00000009737|ENSBTAT00000012836	295575	287313	420025	255129
ENSBTAP00000040280;ENSBTAP00000034616	10	9	429.52	23464	0.971005	0.922905	ARHGDIA	ARHGDIA|UniProtKB Gene Name|Bos taurus Rho GDP dissociation inhibitor (GDI) alpha (ARHGDIA), mRNA. [Source:RefSeq mRNA;Acc:NM_176650]|19|ENSBTAG00000030209|ENSBTAT00000042645	1.0104e+07	9.81107e+06	8.99447e+06	8.30104e+06
ENSBTAP00000030521	8	4	535.67	43013	0.970933	0.823972	G5E5T5	||Uncharacterized protein [Source:UniProtKB/TrEMBL;Acc:G5E5T5]|21|ENSBTAG00000048049|ENSBTAT00000030542	1.3899e+06	1.3495e+06	875195	721136
ENSBTAP00000004751;ENSBTAP00000008107	8	8	298.73	22423	0.970278	0.898655	PRDX1	PRDX1|UniProtKB Gene Name|Bos taurus peroxiredoxin 1 (PRDX1), mRNA. [Source:RefSeq mRNA;Acc:NM_174431]|3|ENSBTAG00000003642|ENSBTAT00000004751	3.73914e+06	3.62801e+06	2.99731e+06	2.69355e+06
ENSBTAP00000008146;ENSBTAP00000050190	6	6	173.76	41590	0.970076	0.992824	ST13	ST13|UniProtKB Gene Name|Bos taurus suppression of tumorigenicity 13 (colon carcinoma) (Hsp70 interacting protein) (ST13), mRNA. [Source:RefSeq mRNA;Acc:NM_001101926]|5|ENSBTAG00000006202|ENSBTAT00000008146	977942	948678	765072	759582
ENSBTAP00000021328	12	3	624.35	19910	0.969285	1.07417	MYL9	MYL9|UniProtKB Gene Name|Myosin regulatory light polypeptide 9 [Source:UniProtKB/Swiss-Prot;Acc:Q5E9E2]|24|ENSBTAG00000016024|ENSBTAT00000021328	5.13296e+06	4.9753e+06	5.98193e+06	6.42562e+06
ENSBTAP00000024107	10	10	565.06	21087	0.968742	0.919976	PEBP1	PEBP1|UniProtKB Gene Name|Bos taurus phosphatidylethanolamine binding protein 1 (PEBP1), mRNA. [Source:RefSeq mRNA;Acc:NM_001033623]|17|ENSBTAG00000018115|ENSBTAT00000024107	1.05992e+07	1.02679e+07	1.04695e+07	9.63171e+06
ENSBTAP00000037402	3	3	77.15	110627	0.967696	1.16947	USP15	USP15|UniProtKB Gene Name|Bos taurus ubiquitin specific peptidase 15 (USP15), mRNA. [Source:RefSeq mRNA;Acc:NM_001046430]|5|ENSBTAG00000010428|ENSBTAT00000037574	143835	139189	128437	150204
ENSBTAP00000012605	1	1	15.74	120520	0.967599	1.01098	PTK2	PTK2|UniProtKB Gene Name|Bos taurus PTK2 protein tyrosine kinase 2 (PTK2), mRNA. [Source:RefSeq mRNA;Acc:NM_001075250]|14|ENSBTAG00000009578|ENSBTAT00000012605	70606.1	68318.4	74441.1	75258.3
ENSBTAP00000019203	4	4	142.95	29750	0.966718	1.36697	PSMA4	PSMA4|UniProtKB Gene Name|Bos taurus proteasome (prosome, macropain) subunit, alpha type, 4 (PSMA4), mRNA. [Source:RefSeq mRNA;Acc:NM_001034381]|21|ENSBTAG00000014440|ENSBTAT00000019203	616840	596311	447010	611049
ENSBTAP00000032864;ENSBTAP00000056614;ENSBTAP00000019336	12	12	555.65	28948	0.966712	0.88665	PGAM1	PGAM1|UniProtKB Gene Name|Bos taurus phosphoglycerate mutase 1 (brain) (PGAM1), mRNA. [Source:RefSeq mRNA;Acc:NM_001034054]|26|ENSBTAG00000012697|ENSBTAT00000032937	1.25214e+07	1.21046e+07	1.20263e+07	1.06631e+07
ENSBTAP00000003636	3	3	61.89	28615	0.966553	1.14757	PSMA3	PSMA3|UniProtKB Gene Name|Bos taurus proteasome (prosome, macropain) subunit, alpha type, 3 (PSMA3), mRNA. [Source:RefSeq mRNA;Acc:NM_001034235]|10|ENSBTAG00000002808|ENSBTAT00000003636	312938	302471	203127	233103
ENSBTAP00000012523	2	2	61.83	10038	0.966006	0.797233	DBI	DBI|UniProtKB Gene Name|Bos taurus diazepam binding inhibitor (GABA receptor modulator, acyl-CoA binding protein) (DBI), mRNA. [Source:RefSeq mRNA;Acc:NM_001113321]|2|ENSBTAG00000009517|ENSBTAT00000012523	1.32687e+06	1.28176e+06	1.2245e+06	976213
ENSBTAP00000006613	2	2	55.67	37557	0.965811	0.91806	GLRX3	GLRX3|EntrezGene|Bos taurus glutaredoxin 3 (GLRX3), mRNA. [Source:RefSeq mRNA;Acc:NM_001035101]|26|ENSBTAG00000005027|ENSBTAT00000006613	120727	116599	104511	95947.5
ENSBTAP00000015548	3	3	129.14	30378	0.965664	1.13247	IMPA1	IMPA1|UniProtKB Gene Name|Bos taurus inositol(myo)-1(or 4)-monophosphatase 1 (IMPA1), mRNA. [Source:RefSeq mRNA;Acc:NM_174361]|14|ENSBTAG00000011709|ENSBTAT00000015548	321704	310658	119152	134936
ENSBTAP00000023642	3	3	129.2	27294	0.964725	0.762178	HSD17B10	HSD17B10|UniProtKB Gene Name|Bos taurus hydroxysteroid (17-beta) dehydrogenase 10 (HSD17B10), mRNA. [Source:RefSeq mRNA;Acc:NM_174334]|X|ENSBTAG00000017779|ENSBTAT00000023642	260591	251398	260546	198583
ENSBTAP00000016609	3	3	118.84	140040	0.964017	1.48305	PLCB3	PLCB3|HGNC Symbol|phospholipase C, beta 3 (phosphatidylinositol-specific) [Source:HGNC Symbol;Acc:9056]|29|ENSBTAG00000012510|ENSBTAT00000016609	86038	82942.1	70793.5	104990
ENSBTAP00000016780	1	1	32.67	10396	0.963368	0.798093	NAA38	NAA38|UniProtKB Gene Name|Bos taurus N(alpha)-acetyltransferase 38, NatC auxiliary subunit (NAA38), mRNA. [Source:RefSeq mRNA;Acc:NM_001034740]|4|ENSBTAG00000012649|ENSBTAT00000016780	60588.9	58369.4	69954.9	55830.6
ENSBTAP00000001464	2	2	53.95	26430	0.962788	1.65967	CACYBP	CACYBP|UniProtKB Gene Name|Bos taurus calcyclin binding protein (CACYBP), mRNA. [Source:RefSeq mRNA;Acc:NM_001034809]|16|ENSBTAG00000001107|ENSBTAT00000001464	82077.2	79022.9	60060.4	99680.2
ENSBTAP00000011371;ENSBTAP00000056637	6	5	232.16	43094	0.962686	0.874693	PRKAR1A	PRKAR1A|UniProtKB Gene Name|Bos taurus protein kinase, cAMP-dependent, regulatory, type I, alpha (tissue specific extinguisher 1) (PRKAR1A), mRNA. [Source:RefSeq mRNA;Acc:NM_001076358]|19|ENSBTAG00000008621|ENSBTAT00000011371	686059	660460	993698	869181
ENSBTAP00000013123	2	2	52.79	57472	0.961904	1.34543	DARS	DARS|EntrezGene|Bos taurus aspartyl-tRNA synthetase (DARS), mRNA. [Source:RefSeq mRNA;Acc:NM_001035085]|2|ENSBTAG00000009949|ENSBTAT00000013123	95530.5	91891.1	69770.6	93871.4
ENSBTAP00000044462	6	6	270.47	41963	0.961513	0.827175	BGN	BGN|UniProtKB Gene Name|Bos taurus biglycan (BGN), mRNA. [Source:RefSeq mRNA;Acc:NM_178318]|X|ENSBTAG00000005250|ENSBTAT00000047242	620158	596290	1.0187e+06	842646
ENSBTAP00000003165	2	2	99.03	37396	0.960882	1.10882	PPA2	PPA2|UniProtKB Gene Name|Bos taurus pyrophosphatase (inorganic) 2 (PPA2), mRNA. [Source:RefSeq mRNA;Acc:NM_001076396]|6|ENSBTAG00000002428|ENSBTAT00000003165	110718	106387	95953.7	106396
ENSBTAP00000037201	1	1	15.48	49644	0.960784	1.01927	SPN	SPN|UniProtKB Gene Name|Bos taurus sialophorin (SPN), mRNA. [Source:RefSeq mRNA;Acc:NM_001103102]|25|ENSBTAG00000026326|ENSBTAT00000037368	40286.2	38706.3	19764.8	20145.7
ENSBTAP00000013310	1	1	47.32	51598	0.960401	0.838663	HADHB	HADHB|UniProtKB Gene Name|Bos taurus hydroxyacyl-CoA dehydrogenase/3-ketoacyl-CoA thiolase/enoyl-CoA hydratase (trifunctional protein), beta subunit (HADHB), mRNA. [Source:RefSeq mRNA;Acc:NM_174336]|11|ENSBTAG00000010083|ENSBTAT00000013310	87148.7	83697.8	107504	90160.1
ENSBTAP00000020878	3	3	198.93	55117	0.959598	1.05701	ERO1L	ERO1L|UniProtKB Gene Name|Bos taurus ERO1-like (S. cerevisiae) (ERO1L), mRNA. [Source:RefSeq mRNA;Acc:NM_001103348]|10|ENSBTAG00000015716|ENSBTAT00000020878	262773	252157	338998	358324
ENSBTAP00000004227	3	3	90.89	12756	0.958927	1.32812	TBCA	TBCA|UniProtKB Gene Name|Bos taurus tubulin folding cofactor A (TBCA), mRNA. [Source:RefSeq mRNA;Acc:NM_175803]|10|ENSBTAG00000003263|ENSBTAT00000004227	219308	210300	169450	225050
ENSBTAP00000000683	1	1	105.06	11220	0.957517	1.27151	CSTB	CSTB|UniProtKB Gene Name|Bos taurus cystatin B (stefin B) (CSTB), mRNA. [Source:RefSeq mRNA;Acc:NM_001037461]|1|ENSBTAG00000000524|ENSBTAT00000000683	848126	812095	358543	455893
ENSBTAP00000024812	5	5	243.22	56883	0.957439	0.951273	ATP6V1B2	ATP6V1B2|UniProtKB Gene Name|Bos taurus ATPase, H+ transporting, lysosomal 56/58kDa, V1 subunit B2 (ATP6V1B2), transcript variant 2, mRNA. [Source:RefSeq mRNA;Acc:NM_176671]|8|ENSBTAG00000018646|ENSBTAT00000024812	423425	405404	449007	427128
ENSBTAP00000022854	18	18	1037.48	57293	0.957265	0.903441	PDIA3	PDIA3|UniProtKB Gene Name|Bos taurus protein disulfide isomerase family A, member 3 (PDIA3), mRNA. [Source:RefSeq mRNA;Acc:NM_174333]|21|ENSBTAG00000017196|ENSBTAT00000022854	7.7596e+06	7.42799e+06	9.88078e+06	8.9267e+06
ENSBTAP00000024094;ENSBTAP00000019791	4	4	227.08	25063	0.956403	1.04011	HMGB1	HMGB1|UniProtKB Gene Name|Bos taurus high mobility group box 1 (HMGB1), mRNA. [Source:RefSeq mRNA;Acc:NM_176612]|12|ENSBTAG00000018103|ENSBTAT00000024094	7.7076e+06	7.37157e+06	4.71745e+06	4.90668e+06
ENSBTAP00000011505	2	2	80.25	28406	0.954998	1.00027	PRDX3	PRDX3|UniProtKB Gene Name|Bos taurus peroxiredoxin 3 (PRDX3), mRNA. [Source:RefSeq mRNA;Acc:NM_174432]|26|ENSBTAG00000008731|ENSBTAT00000011505	185755	177395	189156	189207
ENSBTAP00000011734	2	2	51.41	146506	0.953476	3.34665	SF3B1	SF3B1|HGNC Symbol|splicing factor 3b, subunit 1, 155kDa [Source:HGNC Symbol;Acc:10768]|2|ENSBTAG00000008915|ENSBTAT00000011734	56608	53974.4	9670.94	32365.3
ENSBTAP00000005983	9	9	446.92	34176	0.953005	0.950109	CAPZB	CAPZB|UniProtKB Gene Name|Bos taurus capping protein (actin filament) muscle Z-line, beta (CAPZB), mRNA. [Source:RefSeq mRNA;Acc:NM_176648]|2|ENSBTAG00000004554|ENSBTAT00000005983	3.70208e+06	3.5281e+06	2.9646e+06	2.81669e+06
ENSBTAP00000019702	1	1	34.3	29026	0.952092	0.864928	ENOPH1	ENOPH1|UniProtKB Gene Name|Bos taurus enolase-phosphatase 1 (ENOPH1), mRNA. [Source:RefSeq mRNA;Acc:NM_001075875]|6|ENSBTAG00000014805|ENSBTAT00000019702	109806	104546	101446	87743.4
ENSBTAP00000042274	10	9	611.77	58638	0.949653	1.21973	CCT4	CCT4|EntrezGene|Bos taurus chaperonin containing TCP1, subunit 4 (delta) (CCT4), mRNA. [Source:RefSeq mRNA;Acc:NM_001038194]|11|ENSBTAG00000004531|ENSBTAT00000044819	2.08834e+06	1.9832e+06	1.79032e+06	2.18371e+06
ENSBTAP00000014053	4	4	185.59	44495	0.949384	0.976195	DCTN2	DCTN2|UniProtKB Gene Name|Bos taurus dynactin 2 (p50) (DCTN2), mRNA. [Source:RefSeq mRNA;Acc:NM_001034558]|5|ENSBTAG00000010624|ENSBTAT00000014053	401855	381515	333894	325946
ENSBTAP00000028490	1	1	15.85	53523	0.94921	1.02185	BLMH	BLMH|HGNC Symbol|bleomycin hydrolase [Source:HGNC Symbol;Acc:1059]|19|ENSBTAG00000021370|ENSBTAT00000028490	35926.9	34102.2	33654.7	34390
ENSBTAP00000008473	1	1	15.41	49806	0.947864	0.798753	DLST	DLST|EntrezGene|dihydrolipoyllysine-residue succinyltransferase component of 2-oxoglutarate dehydrogenase complex, mitochondrial [Source:RefSeq peptide;Acc:NP_001068750]|10|ENSBTAG00000006463|ENSBTAT00000008473	119561	113327	158590	126674
ENSBTAP00000050234	1	1	17.21	21764	0.947566	0.999124	AK1	AK1|UniProtKB Gene Name|Bos taurus adenylate kinase 1 (AK1), mRNA. [Source:RefSeq mRNA;Acc:NM_001013582]|11|ENSBTAG00000006305|ENSBTAT00000054038	42903.3	40653.7	49969.2	49925.5
ENSBTAP00000034857	1	1	18.84	44412	0.94709	0.950994	ALKBH5	ALKBH5|UniProtKB Gene Name|Bos taurus alkB, alkylation repair homolog 5 (E. coli) (ALKBH5), mRNA. [Source:RefSeq mRNA;Acc:NM_001205517]|19|ENSBTAG00000025046|ENSBTAT00000034976	14047	13303.8	12508.6	11895.6
ENSBTAP00000054517	8	7	457.39	68189	0.946586	0.486447	CANX	CANX|UniProtKB Gene Name|Bos taurus calnexin (CANX), mRNA. [Source:RefSeq mRNA;Acc:NM_001105612]|7|ENSBTAG00000048107|ENSBTAT00000064711	962736	911313	1.23096e+06	598799
ENSBTAP00000040521	1	1	14.34	81518	0.946416	3.60237	DDX31	DDX31|EntrezGene|Bos taurus DEAD (Asp-Glu-Ala-Asp) box polypeptide 31 (DDX31), mRNA. [Source:RefSeq mRNA;Acc:NM_001101886]|11|ENSBTAG00000003530|ENSBTAT00000042916	23776.6	22502.5	6876.38	24771.2
ENSBTAP00000003192;ENSBTAP00000024663;ENSBTAP00000055631	34	7	1894.16	50634	0.946209	0.806973	TUBA4A	TUBA4A|UniProtKB Gene Name|Bos taurus tubulin, alpha 4a (TUBA4A), mRNA. [Source:RefSeq mRNA;Acc:NM_001078158]|2|ENSBTAG00000030974|ENSBTAT00000003192	3.1673e+07	2.99692e+07	4.75225e+07	3.83494e+07
ENSBTAP00000007088	2	2	71.15	20272	0.944939	1.06561	COPZ1	COPZ1|UniProtKB Gene Name|Bos taurus coatomer protein complex, subunit zeta 1 (COPZ1), mRNA. [Source:RefSeq mRNA;Acc:NM_174282]|5|ENSBTAG00000005384|ENSBTAT00000007088	93527.3	88377.6	73865.5	78712.1
ENSBTAP00000013077	13	1	420.03	32856	0.943934	0.939678	TPM3	TPM3|UniProtKB Gene Name|Bos taurus tropomyosin 3 (TPM3), mRNA. [Source:RefSeq mRNA;Acc:NM_001011674]|3|ENSBTAG00000033217|ENSBTAT00000013077	132721	125280	110119	103477
ENSBTAP00000010787	2	2	96.19	61082	0.943867	0.818416	PRKCSH	PRKCSH|UniProtKB Gene Name|Bos taurus protein kinase C substrate 80K-H (PRKCSH), mRNA. [Source:RefSeq mRNA;Acc:NM_176662]|7|ENSBTAG00000008202|ENSBTAT00000010787	83809.5	79105.1	72750.7	59540.3
ENSBTAP00000001368	3	3	173.16	70008	0.943508	0.669761	RASGRP2	RASGRP2|EntrezGene|Bos taurus RAS guanyl releasing protein 2 (calcium and DAG-regulated) (RASGRP2), mRNA. [Source:RefSeq mRNA;Acc:NM_001099946]|29|ENSBTAG00000001029|ENSBTAT00000001368	136144	128453	272190	182302
ENSBTAP00000023042;ENSBTAP00000018539	3	3	218.83	11277	0.943469	0.611654	PTI	PTI|EntrezGene|Bos taurus spleen trypsin inhibitor (LOC404103), mRNA. [Source:RefSeq mRNA;Acc:NM_205786]|13|ENSBTAG00000017328|ENSBTAT00000023042	2.38964e+07	2.25455e+07	3.38029e+07	2.06757e+07
ENSBTAP00000021808	1	1	55.11	65597	0.943273	1.20641	OPTN	OPTN|UniProtKB Gene Name|Bos taurus optineurin (OPTN), mRNA. [Source:RefSeq mRNA;Acc:NM_001034602]|13|ENSBTAG00000016401|ENSBTAT00000021808	10494.6	9899.27	17616.9	21253.3
ENSBTAP00000008621	5	5	207.46	29852	0.941546	0.977086	PSMA1	PSMA1|UniProtKB Gene Name|Bos taurus proteasome (prosome, macropain) subunit, alpha type, 1 (PSMA1), mRNA. [Source:RefSeq mRNA;Acc:NM_001035310]|15|ENSBTAG00000006564|ENSBTAT00000008621	1.47725e+06	1.3909e+06	1.05478e+06	1.03061e+06
ENSBTAP00000014865	4	4	101.56	29233	0.939363	0.804158	C1QC	C1QC|UniProtKB Gene Name|Bos taurus complement component 1, q subcomponent, C chain (C1QC), mRNA. [Source:RefSeq mRNA;Acc:NM_001206396]|2|ENSBTAG00000011193|ENSBTAT00000014865	352592	331212	779213	626610
ENSBTAP00000004526	2	2	60	18427	0.938972	1.07311	C3H1orf123	C3H1orf123|EntrezGene|Bos taurus chromosome 3 open reading frame, human C1orf123 (C3H1orf123), mRNA. [Source:RefSeq mRNA;Acc:NM_001038130]|3|ENSBTAG00000003484|ENSBTAT00000004526	199705	187518	136071	146019
ENSBTAP00000022782	12	12	666.38	72795	0.938196	0.954799	ERP70	ERP70|UniProtKB Gene Name|Bos taurus protein disulfide isomerase family A, member 4 (PDIA4), mRNA. [Source:RefSeq mRNA;Acc:NM_001045879]|4|ENSBTAG00000017143|ENSBTAT00000022782	1.04764e+06	982892	1.41862e+06	1.3545e+06
ENSBTAP00000017013	2	2	68.64	77801	0.938088	0.829207	MASP2	MASP2|HGNC Symbol|mannan-binding lectin serine peptidase 2 [Source:HGNC Symbol;Acc:6902]|16|ENSBTAG00000012808|ENSBTAT00000017013	35520.5	33321.3	143652	119117
ENSBTAP00000050728	4	4	209.99	68700	0.937978	1.01222	ATP6V1A	ATP6V1A|UniProtKB Gene Name|Bos taurus ATPase, H+ transporting, lysosomal 70kDa, V1 subunit A (ATP6V1A), mRNA. [Source:RefSeq mRNA;Acc:NM_174504]|1|ENSBTAG00000002703|ENSBTAT00000055158	392385	368049	374005	378577
ENSBTAP00000025580	2	2	45.4	56399	0.937832	0.757386	USP14	USP14|HGNC Symbol|ubiquitin specific peptidase 14 (tRNA-guanine transglycosylase) [Source:HGNC Symbol;Acc:12612]|24|ENSBTAG00000019214|ENSBTAT00000025580	56735.9	53208.8	58985.5	44674.8
ENSBTAP00000002508	10	10	655.75	50049	0.937567	1.01606	PDIA6	PDIA6|UniProtKB Gene Name|Bos taurus protein disulfide isomerase family A, member 6 (PDIA6), mRNA. [Source:RefSeq mRNA;Acc:NM_001206345]|11|ENSBTAG00000001928|ENSBTAT00000002508	2.75428e+06	2.58232e+06	3.14006e+06	3.1905e+06
ENSBTAP00000007043;ENSBTAP00000022298	2	2	81.62	59849	0.937323	0.875392	LRRFIP1	LRRFIP1|UniProtKB Gene Name|Bos taurus leucine rich repeat (in FLII) interacting protein 1 (LRRFIP1), mRNA. [Source:RefSeq mRNA;Acc:NM_001102308]|3|ENSBTAG00000005354|ENSBTAT00000007043	113894	106755	82081.1	71853.1
ENSBTAP00000008696;ENSBTAP00000008315	2	2	75.55	10825	0.937317	0.889665	HMGN1	HMGN1|UniProtKB Gene Name|Bos taurus high mobility group nucleosome binding domain 1 (HMGN1), mRNA. [Source:RefSeq mRNA;Acc:NM_001034772]|1|ENSBTAG00000018768|ENSBTAT00000008696	488502	457881	267118	237646
ENSBTAP00000015781	4	4	142.14	96655	0.936879	0.580187	CD22	CD22|HGNC Symbol|CD22 molecule [Source:HGNC Symbol;Acc:1643]|18|ENSBTAG00000011887|ENSBTAT00000015781	229842	215334	320199	185775
ENSBTAP00000012497	2	2	35.49	90400	0.935188	1.19486	STAT5B	STAT5B|UniProtKB Gene Name|Bos taurus signal transducer and activator of transcription 5B (STAT5B), mRNA. [Source:RefSeq mRNA;Acc:NM_174617]|19|ENSBTAG00000010125|ENSBTAT00000012497	65376.9	61139.7	41597.5	49703.3
ENSBTAP00000007107	4	4	140.23	41172	0.93442	0.545472	CD46	||Bos taurus CD46 molecule, complement regulatory protein (CD46), transcript variant 5, mRNA. [Source:RefSeq mRNA;Acc:NM_001242565]|16|ENSBTAG00000005397|ENSBTAT00000007107	326984	305541	481008	262376
ENSBTAP00000053769	1	1	14.32	89107	0.933876	1.52368	AGAP1	AGAP1|HGNC Symbol|ArfGAP with GTPase domain, ankyrin repeat and PH domain 1 [Source:HGNC Symbol;Acc:16922]|3|ENSBTAG00000016504|ENSBTAT00000061206	10961.1	10236.3	8452.21	12878.5
ENSBTAP00000056372	3	3	111.7	49002	0.933864	1.36926	PSMC2	PSMC2|UniProtKB Gene Name|Bos taurus proteasome (prosome, macropain) 26S subunit, ATPase, 2 (PSMC2), mRNA. [Source:RefSeq mRNA;Acc:NM_001015639]|4|ENSBTAG00000046712|ENSBTAT00000065774	177473	165735	136843	187374
ENSBTAP00000012599	4	4	193.36	19076	0.933707	1.00586	SH3BGRL3	SH3BGRL3|UniProtKB Gene Name|Bos taurus SH3 domain binding glutamic acid-rich protein like 3 (SH3BGRL3), mRNA. [Source:RefSeq mRNA;Acc:NM_001034763]|2|ENSBTAG00000009580|ENSBTAT00000012599	1.42942e+06	1.33466e+06	890643	895866
ENSBTAP00000017710	21	21	1182.12	56249	0.93278	0.90359	ATP5B	ATP5B|UniProtKB Gene Name|Bos taurus ATP synthase, H+ transporting, mitochondrial F1 complex, beta polypeptide (ATP5B), mRNA. [Source:RefSeq mRNA;Acc:NM_175796]|5|ENSBTAG00000013315|ENSBTAT00000017710	4.15396e+06	3.87473e+06	5.37133e+06	4.85348e+06
ENSBTAP00000028699	4	4	125.16	71103	0.932735	1.05185	CROT	CROT|EntrezGene|Bos taurus carnitine O-octanoyltransferase (CROT), mRNA. [Source:RefSeq mRNA;Acc:NM_177494]|4|ENSBTAG00000021535|ENSBTAT00000028699	196379	183170	213033	224080
ENSBTAP00000015716	7	7	280.34	50729	0.932142	1.19166	EEF1G	EEF1G|UniProtKB Gene Name|Bos taurus eukaryotic translation elongation factor 1 gamma (EEF1G), mRNA. [Source:RefSeq mRNA;Acc:NM_001040487]|29|ENSBTAG00000011843|ENSBTAT00000015716	2.4845e+06	2.31591e+06	2.40893e+06	2.87061e+06
ENSBTAP00000040793	8	8	314.32	30171	0.92989	0.825428	LASP1	LASP1|UniProtKB Gene Name|Bos taurus LIM and SH3 protein 1 (LASP1), mRNA. [Source:RefSeq mRNA;Acc:NM_001035394]|19|ENSBTAG00000030587|ENSBTAT00000043205	2.17977e+06	2.02695e+06	2.27683e+06	1.87936e+06
ENSBTAP00000047748;ENSBTAP00000001518	2	2	179.59	23351	0.929564	1.05397	CLTA	CLTA|UniProtKB Gene Name|Bos taurus clathrin, light chain A (CLTA), mRNA. [Source:RefSeq mRNA;Acc:NM_174022]|8|ENSBTAG00000001137|ENSBTAT00000055956	257024	238920	230535	242978
ENSBTAP00000042130	6	6	237.91	534456	0.929092	1.06912	DYNC1H1	DYNC1H1|HGNC Symbol|dynein, cytoplasmic 1, heavy chain 1 [Source:HGNC Symbol;Acc:2961]|21|ENSBTAG00000016598|ENSBTAT00000044652	233541	216982	234961	251200
ENSBTAP00000017397	3	3	66.26	33639	0.928993	0.964347	NAPA	NAPA|UniProtKB Gene Name|Bos taurus N-ethylmaleimide-sensitive factor attachment protein, alpha (NAPA), mRNA. [Source:RefSeq mRNA;Acc:NM_001192487]|18|ENSBTAG00000013084|ENSBTAT00000017397	263251	244558	204819	197517
ENSBTAP00000027661;ENSBTAP00000044117	5	5	197	73889	0.928873	0.68012	SELP	SELP|UniProtKB Gene Name|Bos taurus selectin P (granule membrane protein 140kDa, antigen CD62) (SELP), mRNA. [Source:RefSeq mRNA;Acc:NM_174183]|16|ENSBTAG00000020755|ENSBTAT00000027661	2.71972e+06	2.52628e+06	2.856e+06	1.94242e+06
ENSBTAP00000013650;ENSBTAP00000048861	6	6	281.78	37829	0.928281	0.849003	TALDO1	TALDO1|UniProtKB Gene Name|Bos taurus transaldolase 1 (TALDO1), mRNA. [Source:RefSeq mRNA;Acc:NM_001035283]|29|ENSBTAG00000010336|ENSBTAT00000013650	4.73817e+06	4.39836e+06	3.21724e+06	2.73144e+06
ENSBTAP00000017694	1	1	54.21	79824	0.927074	0.66992	ACSS2	ACSS2|UniProtKB Gene Name|Bos taurus acyl-CoA synthetase short-chain family member 2 (ACSS2), mRNA. [Source:RefSeq mRNA;Acc:NM_001105339]|13|ENSBTAG00000013303|ENSBTAT00000017694	52922.9	49063.4	75861.4	50821.1
ENSBTAP00000025008	32	25	2092.04	50583	0.926211	0.692635	TUBB1	TUBB1|EntrezGene|Bos taurus tubulin, beta 1 class VI (TUBB1), mRNA. [Source:RefSeq mRNA;Acc:NM_001144100]|13|ENSBTAG00000018785|ENSBTAT00000025008	4.67021e+07	4.3256e+07	6.84284e+07	4.73959e+07
ENSBTAP00000010741;ENSBTAP00000010738	29	29	2161.16	114770	0.924688	0.603801	ITGA2B	ITGA2B|UniProtKB Gene Name|Bos taurus integrin, alpha 2b (platelet glycoprotein IIb of IIb/IIIa complex, antigen CD41) (ITGA2B), mRNA. [Source:RefSeq mRNA;Acc:NM_001014929]|19|ENSBTAG00000008165|ENSBTAT00000010741	2.21232e+07	2.0457e+07	3.13451e+07	1.89262e+07
ENSBTAP00000011658;ENSBTAP00000027332	7	4	268.35	46002	0.924195	1.04908	HNRNPF	HNRNPF|UniProtKB Gene Name|Bos taurus heterogeneous nuclear ribonucleoprotein F (HNRNPF), mRNA. [Source:RefSeq mRNA;Acc:NM_001014860]|28|ENSBTAG00000008853|ENSBTAT00000011658	604264	558458	937740	983765
ENSBTAP00000049943	1	1	66.63	15201	0.922895	0.689375	C4H7orf41	C4H7orf41|EntrezGene|Bos taurus chromosome 4 open reading frame, human C7orf41 (C4H7orf41), mRNA. [Source:RefSeq mRNA;Acc:NM_001101246]|4|ENSBTAG00000039231|ENSBTAT00000054029	91265	84228.1	166490	114774
ENSBTAP00000020880	1	1	55.75	32660	0.922466	0.790292	TXNL1	TXNL1|HGNC Symbol|thioredoxin-like 1 [Source:HGNC Symbol;Acc:12436]|24|ENSBTAG00000015731|ENSBTAT00000020880	132016	121780	117856	93140.6
ENSBTAP00000037777	7	7	377.44	83813	0.921782	0.865519	DNM1L	DNM1L|UniProtKB Gene Name|Bos taurus dynamin 1-like (DNM1L), mRNA. [Source:RefSeq mRNA;Acc:NM_001046494]|5|ENSBTAG00000011395|ENSBTAT00000037956	453810	418314	523957	453495
ENSBTAP00000010257;ENSBTAP00000049406	2	2	85.91	39027	0.921714	1.2025	IGBP1	IGBP1|UniProtKB Gene Name|Bos taurus immunoglobulin (CD79A) binding protein 1 (IGBP1), mRNA. [Source:RefSeq mRNA;Acc:NM_001242584]|X|ENSBTAG00000007797|ENSBTAT00000010257	99945.9	92121.6	112547	135338
ENSBTAP00000005327;ENSBTAP00000012154	15	8	877.48	28456	0.921591	1.18531	YWHAG	YWHAG|UniProtKB Gene Name|Bos taurus tyrosine 3-monooxygenase/tryptophan 5-monooxygenase activation protein, gamma polypeptide (YWHAG), mRNA. [Source:RefSeq mRNA;Acc:NM_174793]|25|ENSBTAG00000004077|ENSBTAT00000005327	3.61611e+06	3.33258e+06	3.01578e+06	3.57464e+06
ENSBTAP00000004364	22	21	1180.96	92654	0.921553	0.856248	HSP90B1	HSP90B1|UniProtKB Gene Name|Bos taurus heat shock protein 90kDa beta (Grp94), member 1 (HSP90B1), mRNA. [Source:RefSeq mRNA;Acc:NM_174700]|5|ENSBTAG00000003362|ENSBTAT00000004364	4.44161e+06	4.09317e+06	5.33617e+06	4.56908e+06
ENSBTAP00000009178	2	2	89.34	60028	0.920792	0.578435	CD55	CD55|UniProtKB Gene Name|Bos taurus CD55 molecule, decay accelerating factor for complement (Cromer blood group) (CD55), mRNA. [Source:RefSeq mRNA;Acc:NM_001030303]|16|ENSBTAG00000006984|ENSBTAT00000009178	333559	307139	412050	238345
ENSBTAP00000007090	3	3	200.58	16931	0.920337	0.834378	GMFG	GMFG|UniProtKB Gene Name|Bos taurus glia maturation factor, gamma (GMFG), mRNA. [Source:RefSeq mRNA;Acc:NM_001024537]|18|ENSBTAG00000005390|ENSBTAT00000007090	1.35076e+06	1.24315e+06	1.13784e+06	949388
ENSBTAP00000018092	27	27	1455.16	66919	0.918406	0.828714	WDR1	WDR1|HGNC Symbol|WD repeat domain 1 [Source:HGNC Symbol;Acc:12754]|6|ENSBTAG00000013607|ENSBTAT00000018092	2.06475e+07	1.89628e+07	2.12865e+07	1.76404e+07
ENSBTAP00000028902	1	1	27.42	54827	0.917166	0.790343	FH	FH|UniProtKB Gene Name|Bos taurus fumarate hydratase (FH), mRNA. [Source:RefSeq mRNA;Acc:NM_001075803]|16|ENSBTAG00000021688|ENSBTAT00000028902	94363.6	86547.1	78936.3	62386.8
ENSBTAP00000042249	1	1	52.05	33569	0.917009	0.73714	GBAS	GBAS|UniProtKB Gene Name|Bos taurus glioblastoma amplified sequence (GBAS), mRNA. [Source:RefSeq mRNA;Acc:NM_001077011]|25|ENSBTAG00000031598|ENSBTAT00000044787	22884.8	20985.5	41210.4	30377.9
ENSBTAP00000021099	1	1	14.59	31739	0.916982	0.77677	CASP3	CASP3|EntrezGene|Bos taurus caspase 3, apoptosis-related cysteine peptidase (CASP3), mRNA. [Source:RefSeq mRNA;Acc:NM_001077840]|27|ENSBTAG00000015874|ENSBTAT00000021099	71714.5	65760.9	77591.9	60271
ENSBTAP00000041575	12	6	572.86	25403	0.91532	0.894954	YWHAH	YWHAH|EntrezGene|Bos taurus tyrosine 3-monooxygenase/tryptophan 5-monooxygenase activation protein, eta polypeptide (YWHAH), mRNA. [Source:RefSeq mRNA;Acc:NM_174492]|17|ENSBTAG00000031134|ENSBTAT00000044059	1.83192e+06	1.67679e+06	2.04234e+06	1.8278e+06
ENSBTAP00000009904	4	3	190.73	61478	0.915293	1.17144	RAP1GDS1	RAP1GDS1|UniProtKB Gene Name|Bos taurus RAP1, GTP-GDP dissociation stimulator 1 (RAP1GDS1), mRNA. [Source:RefSeq mRNA;Acc:NM_174666]|6|ENSBTAG00000007522|ENSBTAT00000009904	253511	232037	108205	126756
ENSBTAP00000021699	1	1	35.03	28231	0.915192	0.829415	ATP6V1D	ATP6V1D|UniProtKB Gene Name|Bos taurus ATPase, H+ transporting, lysosomal 34kDa, V1 subunit D (ATP6V1D), transcript variant 1, mRNA. [Source:RefSeq mRNA;Acc:NM_001075141]|10|ENSBTAG00000016309|ENSBTAT00000021699	41255.8	37757	63634.8	52779.6
ENSBTAP00000005324	6	4	278.85	33073	0.915168	1.12826	CAPZA2	CAPZA2|UniProtKB Gene Name|Bos taurus capping protein (actin filament) muscle Z-line, alpha 2 (CAPZA2), mRNA. [Source:RefSeq mRNA;Acc:NM_001012998]|4|ENSBTAG00000004072|ENSBTAT00000005324	564016	516170	459950	518943
ENSBTAP00000013713	1	1	14.61	36819	0.914556	0.759878	FAM47E-STBD1	FAM47E-STBD1|HGNC Symbol|FAM47E-STBD1 readthrough [Source:HGNC Symbol;Acc:44667]|6|ENSBTAG00000010389|ENSBTAT00000013713	57707.2	52776.5	68785	52268.2
ENSBTAP00000004145	1	1	24.47	55435	0.9128	0.441982	FSCN1	FSCN1|UniProtKB Gene Name|Bos taurus fascin homolog 1, actin-bundling protein (Strongylocentrotus purpuratus) (FSCN1), mRNA. [Source:RefSeq mRNA;Acc:NM_001035045]|25|ENSBTAG00000003191|ENSBTAT00000004145	36107.3	32958.7	7380.58	3262.08
ENSBTAP00000032642	2	2	85.88	37201	0.912715	0.624572	PPP2R4	PPP2R4|UniProtKB Gene Name|Bos taurus protein phosphatase 2A activator, regulatory subunit 4 (PPP2R4), mRNA. [Source:RefSeq mRNA;Acc:NM_001046173]|11|ENSBTAG00000001933|ENSBTAT00000032713	412197	376218	423019	264206
ENSBTAP00000007036	1	1	23.32	16550	0.911912	2.30348	RPL27A	RPL27A|UniProtKB Gene Name|Bos taurus ribosomal protein L27a (RPL27A), mRNA. [Source:RefSeq mRNA;Acc:NM_001024471]|15|ENSBTAG00000005349|ENSBTAT00000007036	84498.2	77054.9	30195.3	69554.3
ENSBTAP00000012724	11	11	1005.06	40431	0.911788	0.818204	PLEK	PLEK|HGNC Symbol|pleckstrin [Source:HGNC Symbol;Acc:9070]|11|ENSBTAG00000009658|ENSBTAT00000012724	1.64295e+07	1.49802e+07	2.2972e+07	1.87958e+07
ENSBTAP00000015650	1	1	22.23	37133	0.90967	0.984381	CXorf38	CXorf38|HGNC Symbol|chromosome X open reading frame 38 [Source:HGNC Symbol;Acc:28589]|X|ENSBTAG00000011788|ENSBTAT00000015650	17882.4	16267.1	15204.1	14966.7
ENSBTAP00000017366	39	38	2496.94	183295	0.909496	0.964664	IQGAP1	IQGAP1|HGNC Symbol|IQ motif containing GTPase activating protein 1 [Source:HGNC Symbol;Acc:6110]|21|ENSBTAG00000013060|ENSBTAT00000017366	1.00915e+07	9.17818e+06	9.08535e+06	8.76431e+06
ENSBTAP00000043669	7	7	385.13	41789	0.906491	0.827354	SEPT2	SEPT2|EntrezGene|Bos taurus septin 2 (SEPT2), mRNA. [Source:RefSeq mRNA;Acc:NM_001046092]|3|ENSBTAG00000002608|ENSBTAT00000046362	1.3576e+06	1.23066e+06	1.76349e+06	1.45903e+06
ENSBTAP00000002843	1	1	33.78	12636	0.906258	1.37597	TCEB1	TCEB1|UniProtKB Gene Name|Bos taurus transcription elongation factor B (SIII), polypeptide 1 (15kDa, elongin C) (TCEB1), mRNA. [Source:RefSeq mRNA;Acc:NM_001046493]|14|ENSBTAG00000002196|ENSBTAT00000002843	145644	131991	122500	168557
ENSBTAP00000017177	24	17	1333.62	39925	0.906065	0.820887	ALDOA	ALDOA|UniProtKB Gene Name|Bos taurus aldolase A, fructose-bisphosphate (ALDOA), mRNA. [Source:RefSeq mRNA;Acc:NM_001101915]|25|ENSBTAG00000012927|ENSBTAT00000017177	2.75846e+07	2.49935e+07	2.51661e+07	2.06586e+07
ENSBTAP00000022960	14	14	746.56	120300	0.905732	0.615107	ITGA6	ITGA6|HGNC Symbol|integrin, alpha 6 [Source:HGNC Symbol;Acc:6142]|2|ENSBTAG00000017266|ENSBTAT00000022960	1.80235e+06	1.63245e+06	2.21796e+06	1.36428e+06
ENSBTAP00000023836	4	4	173.35	29316	0.905676	0.628484	CD58	CD58|UniProtKB Gene Name|CD58 protein; Uncharacterized protein [Source:UniProtKB/TrEMBL;Acc:A7YW37]|3|ENSBTAG00000040131|ENSBTAT00000023836	998737	904532	1.07207e+06	673778
ENSBTAP00000027870;ENSBTAP00000040548;ENSBTAP00000001407	11	11	413.12	78081	0.905479	0.692058	PRKCB	PRKCB|UniProtKB Gene Name|Bos taurus protein kinase C, beta (PRKCB), mRNA. [Source:RefSeq mRNA;Acc:NM_174587]|25|ENSBTAG00000020921|ENSBTAT00000027870	1.40038e+06	1.26801e+06	2.39992e+06	1.66088e+06
ENSBTAP00000006992;ENSBTAP00000008077	18	14	988.81	50969	0.905044	1.0058	GDI2	GDI2|UniProtKB Gene Name|Bos taurus GDP dissociation inhibitor 2 (GDI2), mRNA. [Source:RefSeq mRNA;Acc:NM_001033762]|13|ENSBTAG00000005316|ENSBTAT00000006992	6.6303e+06	6.00071e+06	6.14052e+06	6.17614e+06
ENSBTAP00000011696	2	1	62.61	30660	0.904883	0.610919	MAPRE3	MAPRE3|UniProtKB Gene Name|Bos taurus microtubule-associated protein, RP/EB family, member 3 (MAPRE3), mRNA. [Source:RefSeq mRNA;Acc:NM_001075917]|11|ENSBTAG00000008884|ENSBTAT00000011696	27944.1	25286.2	71579.9	43729.5
ENSBTAP00000001613	8	4	416.77	50623	0.904071	1.0092	IGM	||Uncharacterized protein [Source:UniProtKB/TrEMBL;Acc:G5E513]|8|ENSBTAG00000001219|ENSBTAT00000001613	3.85736e+06	3.48733e+06	2.04852e+06	2.06737e+06
ENSBTAP00000027078	8	3	460.11	68379	0.903687	1.14168	AP2B1	AP2B1|HGNC Symbol|adaptor-related protein complex 2, beta 1 subunit [Source:HGNC Symbol;Acc:563]|19|ENSBTAG00000020316|ENSBTAT00000027078	260079	235030	232757	265735
ENSBTAP00000016432	9	8	495.85	103425	0.903172	0.854954	HK1	HK1|UniProtKB Gene Name|Bos taurus hexokinase 1 (HK1), mRNA. [Source:RefSeq mRNA;Acc:NM_001012668]|28|ENSBTAG00000012380|ENSBTAT00000016432	1.00102e+06	904089	1.15682e+06	989025
ENSBTAP00000011757	1	1	29.05	24228	0.90283	1.38374	CREG1	CREG1|HGNC Symbol|cellular repressor of E1A-stimulated genes 1 [Source:HGNC Symbol;Acc:2351]|3|ENSBTAG00000008931|ENSBTAT00000011757	44921.9	40556.8	15799.5	21862.3
ENSBTAP00000026686	2	2	100.12	59154	0.90146	0.958144	LYN	LYN|HGNC Symbol|v-yes-1 Yamaguchi sarcoma viral related oncogene homolog [Source:HGNC Symbol;Acc:6735]|14|ENSBTAG00000020034|ENSBTAT00000026686	194618	175440	167803	160779
ENSBTAP00000017500	35	19	2239.77	70500	0.900565	0.780556	HSPA1A	HSPA1A|UniProtKB Gene Name|Bos taurus heat shock 70kDa protein 1A (HSPA1A), mRNA. [Source:RefSeq mRNA;Acc:NM_203322]|23|ENSBTAG00000025441|ENSBTAT00000017500	1.51678e+07	1.36596e+07	2.16662e+07	1.69117e+07
ENSBTAP00000012886	3	3	62.06	81225	0.900177	0.685429	GPD2	GPD2|UniProtKB Gene Name|Bos taurus glycerol-3-phosphate dehydrogenase 2 (mitochondrial) (GPD2), mRNA. [Source:RefSeq mRNA;Acc:NM_001100296]|2|ENSBTAG00000009770|ENSBTAT00000012886	170502	153482	276545	189552
ENSBTAP00000038955;ENSBTAP00000031532	3	3	119.92	16598	0.89967	0.982724	UBE2V1	UBE2V1|UniProtKB Gene Name|Bos taurus ubiquitin-conjugating enzyme E2 variant 1 (UBE2V1), mRNA. [Source:RefSeq mRNA;Acc:NM_001035497]|13|ENSBTAG00000027316|ENSBTAT00000039155	877503	789463	731679	719039
ENSBTAP00000006216	4	3	142.44	25304	0.898988	1.0247	GRB2	GRB2|UniProtKB Gene Name|Bos taurus growth factor receptor-bound protein 2 (GRB2), mRNA. [Source:RefSeq mRNA;Acc:NM_001034630]|19|ENSBTAG00000004736|ENSBTAT00000006216	512489	460722	351195	359871
ENSBTAP00000008479	1	1	30.38	24771	0.898341	0.915273	CD53	CD53|UniProtKB Gene Name|Bos taurus CD53 molecule (CD53), mRNA. [Source:RefSeq mRNA;Acc:NM_001034232]|3|ENSBTAG00000006466|ENSBTAT00000008479	457390	410892	400353	366433
ENSBTAP00000027623	2	2	34.14	38525	0.895848	0.689853	DHRS7	DHRS7|UniProtKB Gene Name|Bos taurus dehydrogenase/reductase (SDR family) member 7 (DHRS7), mRNA. [Source:RefSeq mRNA;Acc:NM_001046162]|10|ENSBTAG00000020729|ENSBTAT00000027623	139228	124727	124199	85678.9
ENSBTAP00000054179	3	3	111.16	26456	0.89373	0.624429	IgM	||Bos taurus IgM (LOC524810), mRNA. [Source:RefSeq mRNA;Acc:NM_001205186]|21|ENSBTAG00000047700|ENSBTAT00000063930	208437	186286	254616	158990
ENSBTAP00000056178	2	2	95.95	33599	0.892914	0.956999	STX11	STX11|EntrezGene|Bos taurus syntaxin 11 (STX11), mRNA. [Source:RefSeq mRNA;Acc:NM_001205736]|9|ENSBTAG00000011236|ENSBTAT00000014922	271619	242533	201792	193114
ENSBTAP00000021833	6	6	462.55	69946	0.892543	0.826191	LTA4H	LTA4H|UniProtKB Gene Name|Bos taurus leukotriene A4 hydrolase (LTA4H), mRNA. [Source:RefSeq mRNA;Acc:NM_001034280]|5|ENSBTAG00000016415|ENSBTAT00000021833	1.41536e+06	1.26327e+06	1.57588e+06	1.30198e+06
ENSBTAP00000024572	29	21	1440.32	53752	0.892423	1.19149	VIM	VIM|UniProtKB Gene Name|Bos taurus vimentin (VIM), mRNA. [Source:RefSeq mRNA;Acc:NM_173969]|13|ENSBTAG00000018463|ENSBTAT00000024572	2.29054e+07	2.04413e+07	1.01539e+07	1.20983e+07
ENSBTAP00000012905;ENSBTAP00000004192	2	2	64.27	25103	0.892022	0.667086	RAB32	RAB32|EntrezGene|Bos taurus RAB32, member RAS oncogene family (RAB32), mRNA. [Source:RefSeq mRNA;Acc:NM_001205950]|9|ENSBTAG00000009784|ENSBTAT00000012905	68997.8	61547.5	98126	65458.5
ENSBTAP00000046207	3	3	203.93	42937	0.891087	1.04792	PDGFD	PDGFD|UniProtKB Gene Name|Bos taurus platelet derived growth factor D (PDGFD), mRNA. [Source:RefSeq mRNA;Acc:NM_001083706]|15|ENSBTAG00000034827|ENSBTAT00000049292	379681	338329	411142	430843
ENSBTAP00000008132;ENSBTAP00000036739	34	17	2581.31	42108	0.890008	0.988995	ACTG1	ACTG1|UniProtKB Gene Name|Bos taurus actin, gamma 1 (ACTG1), mRNA. [Source:RefSeq mRNA;Acc:NM_001033618]|19|ENSBTAG00000006189|ENSBTAT00000008132	4.57508e+08	4.07186e+08	4.88299e+08	4.82925e+08
ENSBTAP00000042479	3	1	101.57	14541	0.889841	1.66727	HIST2H2AB	HIST2H2AB|HGNC Symbol|histone cluster 2, H2ab [Source:HGNC Symbol;Acc:20508]|3|ENSBTAG00000038476|ENSBTAT00000045062	46448.9	41332.1	36786.8	61333.3
ENSBTAP00000051774;ENSBTAP00000001575	2	2	68.66	12003	0.889839	0.884954	GLRX	GLRX|UniProtKB Gene Name|Bos taurus glutaredoxin (thioltransferase) (GLRX), mRNA. [Source:RefSeq mRNA;Acc:NM_001037604]|7|ENSBTAG00000038186|ENSBTAT00000054658	1.39188e+06	1.23855e+06	1.11399e+06	985834
ENSBTAP00000010911	3	3	117.46	27392	0.88946	0.723985	PROCR	PROCR|UniProtKB Gene Name|Bos taurus protein C receptor, endothelial (PROCR), mRNA. [Source:RefSeq mRNA;Acc:NM_174437]|13|ENSBTAG00000008291|ENSBTAT00000010911	307826	273799	332312	240589
ENSBTAP00000003415	5	5	230.56	38744	0.888402	0.974834	SEPT9	SEPT9|HGNC Symbol|septin 9 [Source:HGNC Symbol;Acc:7323]|19|ENSBTAG00000002633|ENSBTAT00000003415	751841	667937	680253	663133
ENSBTAP00000021408	5	3	128.1	23840	0.888385	0.713066	RAB8A	RAB8A|UniProtKB Gene Name|Bos taurus RAB8A, member RAS oncogene family (RAB8A), mRNA. [Source:RefSeq mRNA;Acc:NM_001105481]|7|ENSBTAG00000038696|ENSBTAT00000021408	219777	195246	190222	135641
ENSBTAP00000033320	1	1	35.52	68268	0.888271	0.90022	C8B	C8B|EntrezGene|Bos taurus complement component 8, beta polypeptide (C8B), mRNA. [Source:RefSeq mRNA;Acc:NM_001046141]|3|ENSBTAG00000003775|ENSBTAT00000033407	26993.3	23977.3	35951.5	32364.2
ENSBTAP00000036278	6	6	256.59	45360	0.888093	0.754477	CNP	CNP|UniProtKB Gene Name|Bos taurus 2',3'-cyclic nucleotide 3' phosphodiesterase (CNP), mRNA. [Source:RefSeq mRNA;Acc:NM_180993]|19|ENSBTAG00000025762|ENSBTAT00000036420	818530	726931	931991	703166
ENSBTAP00000047973	6	5	276.2	31773	0.888056	0.900897	LOC790886	||Bos taurus uncharacterized LOC790886 (LOC790886), mRNA. [Source:RefSeq mRNA;Acc:NM_001105027]|16|ENSBTAG00000040409|ENSBTAT00000055302	79837.8	70900.4	2.39358e+06	2.15637e+06
ENSBTAP00000040493	4	4	294.7	54597	0.887832	0.569485	SLC2A3	SLC2A3|UniProtKB Gene Name|Bos taurus solute carrier family 2 (facilitated glucose transporter), member 3 (SLC2A3), mRNA. [Source:RefSeq mRNA;Acc:NM_174603]|5|ENSBTAG00000004556|ENSBTAT00000042889	2.81741e+06	2.50138e+06	2.82153e+06	1.60682e+06
ENSBTAP00000028364	6	6	270.3	29070	0.887771	0.984666	PSMB4	PSMB4|UniProtKB Gene Name|Bos taurus proteasome (prosome, macropain) subunit, beta type, 4 (PSMB4), mRNA. [Source:RefSeq mRNA;Acc:NM_001034266]|3|ENSBTAG00000021288|ENSBTAT00000028364	975408	865939	739225	727889
ENSBTAP00000034009;ENSBTAP00000056088	5	5	262.1	10679	0.883931	1.11532	S100A12	S100A12|UniProtKB Gene Name|Bos taurus S100 calcium binding protein A12 (S100A12), mRNA. [Source:RefSeq mRNA;Acc:NM_174651]|3|ENSBTAG00000012638|ENSBTAT00000034108	3.87182e+06	3.42242e+06	1.00202e+06	1.11758e+06
ENSBTAP00000032779	16	9	837.39	28032	0.883844	0.930031	YWHAQ	YWHAQ|UniProtKB Gene Name|Bos taurus tyrosine 3-monooxygenase/tryptophan 5-monooxygenase activation protein, theta polypeptide (YWHAQ), mRNA. [Source:RefSeq mRNA;Acc:NM_001078127]|11|ENSBTAG00000002108|ENSBTAT00000032851	5.97385e+06	5.27995e+06	6.25921e+06	5.82126e+06
ENSBTAP00000022455	2	2	84.19	38246	0.882642	0.84834	VPS26A	VPS26A|UniProtKB Gene Name|Bos taurus vacuolar protein sorting 26 homolog A (S. pombe) (VPS26A), mRNA. [Source:RefSeq mRNA;Acc:NM_001075455]|28|ENSBTAG00000016882|ENSBTAT00000022455	202285	178545	151896	128859
ENSBTAP00000055364	12	11	808.12	41638	0.882358	0.987801	FERMT3	FERMT3|UniProtKB Gene Name|Bos taurus fermitin family member 3 (FERMT3), mRNA. [Source:RefSeq mRNA;Acc:NM_001037606]|29|ENSBTAG00000045862|ENSBTAT00000062951	1.75373e+07	1.54742e+07	1.87927e+07	1.85634e+07
ENSBTAP00000021704	7	7	255.1	16114	0.882258	0.83718	COTL1	COTL1|UniProtKB Gene Name|Bos taurus coactosin-like 1 (Dictyostelium) (COTL1), mRNA. [Source:RefSeq mRNA;Acc:NM_001046593]|18|ENSBTAG00000016315|ENSBTAT00000021704	2.33092e+07	2.05647e+07	2.44485e+07	2.04678e+07
ENSBTAP00000039829	1	1	39.41	13791	0.880667	2.41687	RPS25	RPS25|UniProtKB Gene Name|Bos taurus ribosomal protein S25 (RPS25), mRNA. [Source:RefSeq mRNA;Acc:NM_001025315]|15|ENSBTAG00000027772|ENSBTAT00000040046	50526.2	44496.8	15892.2	38409.5
ENSBTAP00000054151;ENSBTAP00000048567	8	1	394.63	38257	0.880108	1.17532	PPP1CA	PPP1CA|HGNC Symbol|protein phosphatase 1, catalytic subunit, alpha isozyme [Source:HGNC Symbol;Acc:9281]|1|ENSBTAG00000040418|ENSBTAT00000045897	68067.9	59907.1	48027	56447.1
ENSBTAP00000009363	7	7	352.85	46779	0.879828	0.924428	GSR	GSR|EntrezGene|Bos taurus glutathione reductase (GSR), mRNA. [Source:RefSeq mRNA;Acc:NM_001114190]|27|ENSBTAG00000007115|ENSBTAT00000009363	2.00703e+06	1.76584e+06	1.84264e+06	1.70338e+06
ENSBTAP00000043475	2	2	47.35	60730	0.879436	0.692302	ATL3	ATL3|UniProtKB Gene Name|Bos taurus atlastin GTPase 3 (ATL3), mRNA. [Source:RefSeq mRNA;Acc:NM_001098978]|29|ENSBTAG00000003330|ENSBTAT00000046152	26652.5	23439.1	44213.6	30609.1
ENSBTAP00000027893	1	1	34.36	54375	0.878136	1.20482	ANXA11	ANXA11|EntrezGene|annexin A11 [Source:RefSeq peptide;Acc:NP_776927]|28|ENSBTAG00000020940|ENSBTAT00000027893	98428.4	86433.5	89147.9	107407
ENSBTAP00000011769	4	4	213.06	47702	0.878061	0.626869	NPTX1	NPTX1|EntrezGene|Bos taurus neuronal pentraxin I (NPTX1), mRNA. [Source:RefSeq mRNA;Acc:NM_001192354]|19|ENSBTAG00000008940|ENSBTAT00000011769	407455	357771	332324	208324
ENSBTAP00000000179	5	5	175.07	19172	0.877864	0.786655	LGALSL	LGALSL|EntrezGene|Bos taurus lectin, galactoside-binding-like (LGALSL), mRNA. [Source:RefSeq mRNA;Acc:NM_001205831]|11|ENSBTAG00000000156|ENSBTAT00000000179	1.65717e+06	1.45477e+06	1.28632e+06	1.01189e+06
ENSBTAP00000012302	1	1	20.06	98306	0.877728	1.17125	AAK1	AAK1|UniProtKB Gene Name|AP2-associated protein kinase 1 [Source:UniProtKB/Swiss-Prot;Acc:F1MH24]|11|ENSBTAG00000009343|ENSBTAT00000012302	12793.7	11229.4	18459.5	21620.8
ENSBTAP00000001113	1	1	23.29	114152	0.877495	0.166831	PARP1	PARP1|HGNC Symbol|poly (ADP-ribose) polymerase 1 [Source:HGNC Symbol;Acc:270]|16|ENSBTAG00000000837|ENSBTAT00000001113	15612.5	13699.9	2005.26	334.54
ENSBTAP00000016410	4	1	170.35	28771	0.875827	0.667335	ANP32A	ANP32A|UniProtKB Gene Name|Bos taurus acidic (leucine-rich) nuclear phosphoprotein 32 family, member A (ANP32A), mRNA. [Source:RefSeq mRNA;Acc:NM_001195019]|10|ENSBTAG00000012365|ENSBTAT00000016410	170083	148964	105286	70261.1
ENSBTAP00000014799;ENSBTAP00000003764	3	3	200.76	60897	0.873643	0.668992	KPNA1	KPNA1|UniProtKB Gene Name|Bos taurus karyopherin alpha 1 (importin alpha 5) (KPNA1), mRNA. [Source:RefSeq mRNA;Acc:NM_001081733]|1|ENSBTAG00000011143|ENSBTAT00000014799	230099	201024	283138	189417
ENSBTAP00000014894;ENSBTAP00000007434	48	30	2507.37	105319	0.872758	1.03144	ACTN4	ACTN4|UniProtKB Gene Name|Bos taurus actinin, alpha 4 (ACTN4), mRNA. [Source:RefSeq mRNA;Acc:NM_001098052]|18|ENSBTAG00000011215|ENSBTAT00000014894	1.3348e+07	1.16496e+07	8.56233e+06	8.83152e+06
ENSBTAP00000001802	4	4	183.91	62999	0.872107	0.782179	LGALS3BP	LGALS3BP|UniProtKB Gene Name|Bos taurus lectin, galactoside-binding, soluble, 3 binding protein (LGALS3BP), mRNA. [Source:RefSeq mRNA;Acc:NM_001046316]|19|ENSBTAG00000001368|ENSBTAT00000001802	665964	580792	738350	577521
ENSBTAP00000020933	17	17	656.9	90344	0.871874	0.797368	EML2	EML2|HGNC Symbol|echinoderm microtubule associated protein like 2 [Source:HGNC Symbol;Acc:18035]|18|ENSBTAG00000015764|ENSBTAT00000020933	3.90476e+06	3.40446e+06	6.69734e+06	5.34025e+06
ENSBTAP00000022558	6	5	251.93	109916	0.8714	0.810173	GANAB	GANAB|UniProtKB Gene Name|Bos taurus glucosidase, alpha; neutral AB (GANAB), mRNA. [Source:RefSeq mRNA;Acc:NM_001205777]|29|ENSBTAG00000016956|ENSBTAT00000022558	247975	216085	288430	233678
ENSBTAP00000003613	6	6	207.64	24824	0.871208	0.645331	RAB27B	RAB27B|UniProtKB Gene Name|Ras-related protein Rab-27B [Source:UniProtKB/Swiss-Prot;Acc:Q8HZJ5]|24|ENSBTAG00000002788|ENSBTAT00000003613	545329	475095	682992	440756
ENSBTAP00000012837	4	4	124.11	54091	0.870817	1.30343	A1BG	A1BG|UniProtKB Gene Name|Bos taurus alpha-1-B glycoprotein (A1BG), mRNA. [Source:RefSeq mRNA;Acc:NM_001046243]|18|ENSBTAG00000009735|ENSBTAT00000012837	487005	424092	301387	392838
ENSBTAP00000002444	1	1	19.26	16457	0.870544	1.01091	HMGN5	HMGN5|HGNC Symbol|high mobility group nucleosome binding domain 5 [Source:HGNC Symbol;Acc:8013]|X|ENSBTAG00000001877|ENSBTAT00000002444	28711.1	24994.3	22648.7	22895.7
ENSBTAP00000017850	4	4	103.52	33907	0.868003	0.649944	BLVRA	BLVRA|UniProtKB Gene Name|Bos taurus biliverdin reductase A (BLVRA), mRNA. [Source:RefSeq mRNA;Acc:NM_001097571]|4|ENSBTAG00000013414|ENSBTAT00000017850	306733	266245	307185	199653
ENSBTAP00000020148	3	3	108.16	11358	0.867922	1.3198	S100A11	S100A11|UniProtKB Gene Name|protein S100-A11 [Source:RefSeq peptide;Acc:NP_001092326]|3|ENSBTAG00000015145|ENSBTAT00000020148	837384	726783	220061	290436
ENSBTAP00000020096	5	4	235.91	24190	0.866989	0.99691	HMGB2	HMGB2|UniProtKB Gene Name|Bos taurus high mobility group box 2 (HMGB2), mRNA. [Source:RefSeq mRNA;Acc:NM_001037616]|8|ENSBTAG00000015101|ENSBTAT00000020096	4.55328e+06	3.94764e+06	2.436e+06	2.42847e+06
ENSBTAP00000024617	1	1	28.44	51433	0.866858	1.24026	SDPR	SDPR|UniProtKB Gene Name|SDPR protein; Uncharacterized protein [Source:UniProtKB/TrEMBL;Acc:Q17QZ6]|2|ENSBTAG00000018497|ENSBTAT00000024617	33447.5	28994.2	66215.3	82124.2
ENSBTAP00000009264	3	1	118.45	46429	0.866201	0.715606	SERPINA3	||Uncharacterized protein [Source:UniProtKB/TrEMBL;Acc:G8JKW7]|21|ENSBTAG00000007043|ENSBTAT00000009264	38788.8	33598.9	70092.6	50158.7
ENSBTAP00000004034	1	1	29.26	98344	0.865932	1.33167	SMTN	SMTN|UniProtKB Gene Name|Bos taurus smoothelin (SMTN), mRNA. [Source:RefSeq mRNA;Acc:NM_001076879]|17|ENSBTAG00000003100|ENSBTAT00000004034	22964.7	19885.9	23395.4	31154.8
ENSBTAP00000041649	2	2	50.66	72871	0.865663	0.450595	SLC9A9	SLC9A9|EntrezGene|Bos taurus solute carrier family 9, subfamily A (NHE9, cation proton antiporter 9), member 9 (SLC9A9), mRNA. [Source:RefSeq mRNA;Acc:NM_001076068]|1|ENSBTAG00000031178|ENSBTAT00000044136	97498.9	84401.3	125157	56394.9
ENSBTAP00000007589	16	16	690.95	70051	0.865347	0.90748	PGM2	PGM2|UniProtKB Gene Name|PGM2 protein; Uncharacterized protein [Source:UniProtKB/TrEMBL;Acc:A6QQ11]|6|ENSBTAG00000005773|ENSBTAT00000007589	4.16057e+06	3.60033e+06	3.29708e+06	2.99203e+06
ENSBTAP00000032310	10	10	303.89	77080	0.865174	0.729617	PROS1	PROS1|UniProtKB Gene Name|Bos taurus protein S (alpha) (PROS1), mRNA. [Source:RefSeq mRNA;Acc:NM_174438]|1|ENSBTAG00000023652|ENSBTAT00000032377	1.88374e+06	1.62976e+06	1.73622e+06	1.26678e+06
ENSBTAP00000025561	6	6	182.19	12027	0.863097	1.6837	S100A4	S100A4|UniProtKB Gene Name|Bos taurus S100 calcium binding protein A4 (S100A4), mRNA. [Source:RefSeq mRNA;Acc:NM_174595]|3|ENSBTAG00000019203|ENSBTAT00000025561	2.93643e+06	2.53443e+06	690244	1.16217e+06
ENSBTAP00000018284;ENSBTAP00000026776;ENSBTAP00000052803;ENSBTAP00000023448	3	3	76.36	17292	0.863067	1.32091	STMN1	STMN1|UniProtKB Gene Name|Bos taurus stathmin 1 (STMN1), mRNA. [Source:RefSeq mRNA;Acc:NM_001034790]|2|ENSBTAG00000013761|ENSBTAT00000018284	199990	172605	82754.8	109311
ENSBTAP00000023183	3	3	81.48	15788	0.862972	2.27785	RPL27	RPL27|UniProtKB Gene Name|Bos taurus ribosomal protein L27 (RPL27), mRNA. [Source:RefSeq mRNA;Acc:NM_001034051]|19|ENSBTAG00000017441|ENSBTAT00000023183	220554	190332	77645.1	176864
ENSBTAP00000008500	4	4	437.27	33348	0.862628	0.676875	TREML1	TREML1|HGNC Symbol|triggering receptor expressed on myeloid cells-like 1 [Source:HGNC Symbol;Acc:20434]|23|ENSBTAG00000006485|ENSBTAT00000008500	1.10104e+07	9.49786e+06	1.44006e+07	9.74741e+06
ENSBTAP00000022979	33	32	1833.92	188568	0.862549	0.81086	C3	C3|UniProtKB Gene Name|Bos taurus complement component 3 (C3), mRNA. [Source:RefSeq mRNA;Acc:NM_001040469]|7|ENSBTAG00000017280|ENSBTAT00000022979	4.79248e+06	4.13374e+06	8.80296e+06	7.13796e+06
ENSBTAP00000004635	4	4	171.27	52974	0.861737	0.976329	HPX	HPX|UniProtKB Gene Name|Bos taurus hemopexin (HPX), mRNA. [Source:RefSeq mRNA;Acc:NM_001034612]|15|ENSBTAG00000003564|ENSBTAT00000004635	349316	301018	767799	749624
ENSBTAP00000010491	2	2	81.17	98860	0.860134	0.920305	TNPO1	TNPO1|EntrezGene|Bos taurus transportin 1 (TNPO1), mRNA. [Source:RefSeq mRNA;Acc:NM_001076540]|20|ENSBTAG00000007979|ENSBTAT00000010491	156293	134433	188833	173784
ENSBTAP00000022227;ENSBTAP00000054670;ENSBTAP00000042206;ENSBTAP00000035638;ENSBTAP00000000348;ENSBTAP00000023407	5	3	224.79	22891	0.859258	0.842933	RAB1A	RAB1A|UniProtKB Gene Name|Bos taurus RAB1A, member RAS oncogene family (RAB1A), mRNA. [Source:RefSeq mRNA;Acc:NM_001033628]|11|ENSBTAG00000016720|ENSBTAT00000022227	1.42208e+06	1.22194e+06	1.8152e+06	1.53009e+06
ENSBTAP00000055732	1	1	49.86	14046	0.858599	0.868796		||Uncharacterized protein [Source:UniProtKB/TrEMBL;Acc:G3N1I8]|7|ENSBTAG00000046245|ENSBTAT00000063289	129846	111485	54344.5	47214.3
ENSBTAP00000002674	21	19	1198.88	22583	0.858497	0.808978	TAGLN2	TAGLN2|UniProtKB Gene Name|Bos taurus transgelin 2 (TAGLN2), mRNA. [Source:RefSeq mRNA;Acc:NM_001013599]|3|ENSBTAG00000002068|ENSBTAT00000002674	3.38666e+07	2.90743e+07	4.10706e+07	3.32252e+07
ENSBTAP00000023325	8	8	548.53	47978	0.858396	0.88215	DBNL	DBNL|UniProtKB Gene Name|Bos taurus drebrin-like (DBNL), mRNA. [Source:RefSeq mRNA;Acc:NM_001098970]|22|ENSBTAG00000017547|ENSBTAT00000023325	1.35923e+06	1.16676e+06	1.16424e+06	1.02704e+06
ENSBTAP00000041967	3	3	207.33	30350	0.858174	0.773483	MAPRE1	MAPRE1|HGNC Symbol|microtubule-associated protein, RP/EB family, member 1 [Source:HGNC Symbol;Acc:6890]|13|ENSBTAG00000003908|ENSBTAT00000044474	1.53013e+06	1.31312e+06	1.57017e+06	1.2145e+06
ENSBTAP00000027261	3	3	219.94	40031	0.858105	0.639817	TGFB1	TGFB1|EntrezGene|Bos taurus transforming growth factor, beta 1 (TGFB1), mRNA. [Source:RefSeq mRNA;Acc:NM_001166068]|18|ENSBTAG00000020457|ENSBTAT00000027261	428783	367940	494756	316553
ENSBTAP00000018869	12	12	666.19	63699	0.857441	0.807201	QSOX1	QSOX1|HGNC Symbol|quiescin Q6 sulfhydryl oxidase 1 [Source:HGNC Symbol;Acc:9756]|16|ENSBTAG00000014191|ENSBTAT00000018869	6.72798e+06	5.76885e+06	7.8893e+06	6.36825e+06
ENSBTAP00000017503;ENSBTAP00000006129	29	21	1804.76	68047	0.857049	0.907541	MSN	MSN|UniProtKB Gene Name|Bos taurus moesin (MSN), mRNA. [Source:RefSeq mRNA;Acc:NM_001046477]|X|ENSBTAG00000003418|ENSBTAT00000017503	2.23189e+07	1.91284e+07	1.88726e+07	1.71276e+07
ENSBTAP00000030991	4	4	116.03	163181	0.856881	0.893897	CLASP1	CLASP1|HGNC Symbol|cytoplasmic linker associated protein 1 [Source:HGNC Symbol;Acc:17088]|2|ENSBTAG00000019781|ENSBTAT00000031027	226796	194338	298646	266958
ENSBTAP00000015199	7	7	387.67	104218	0.856596	0.912208	NPEPPS	|||19|ENSBTAG00000011435|ENSBTAT00000015199	829922	710908	877518	800479
ENSBTAP00000042500	2	2	93.99	20800	0.856558	0.791854	MANF	MANF|UniProtKB Gene Name|Bos taurus mesencephalic astrocyte-derived neurotrophic factor (MANF), mRNA. [Source:RefSeq mRNA;Acc:NM_001101211]|22|ENSBTAG00000031797|ENSBTAT00000045083	160143	137172	194110	153707
ENSBTAP00000027182	1	1	46.51	20732	0.856083	0.990295	TNFAIP8L2	TNFAIP8L2|UniProtKB Gene Name|Bos taurus tumor necrosis factor, alpha-induced protein 8-like 2 (TNFAIP8L2), mRNA. [Source:RefSeq mRNA;Acc:NM_001034389]|3|ENSBTAG00000020394|ENSBTAT00000027182	30585.7	26183.9	23991.6	23758.7
ENSBTAP00000008357	1	1	44.01	40179	0.854855	0.740117	CTGF	CTGF|UniProtKB Gene Name|Bos taurus connective tissue growth factor (CTGF), mRNA. [Source:RefSeq mRNA;Acc:NM_174030]|9|ENSBTAG00000006367|ENSBTAT00000008357	95532.8	81666.7	111809	82752.1
ENSBTAP00000006245;ENSBTAP00000017435	2	2	83.25	27578	0.854162	0.840059	GSTO1	||Bos taurus glutathione S-transferase omega 1 (GSTO1), mRNA. [Source:RefSeq mRNA;Acc:NM_001075214]|26|ENSBTAG00000003989|ENSBTAT00000006245	143648	122699	177563	149164
ENSBTAP00000010108	3	3	197.54	26529	0.853749	1.11077	PSMB1	PSMB1|EntrezGene|Bos taurus proteasome (prosome, macropain) subunit, beta type, 1 (PSMB1), mRNA. [Source:RefSeq mRNA;Acc:NM_001038539]|9|ENSBTAG00000007685|ENSBTAT00000010108	967611	826096	620406	689128
ENSBTAP00000012897	3	3	91.6	21501	0.852912	0.847588	NRAS	NRAS|UniProtKB Gene Name|Bos taurus neuroblastoma RAS viral (v-ras) oncogene homolog (NRAS), mRNA. [Source:RefSeq mRNA;Acc:NM_001097989]|3|ENSBTAG00000046797|ENSBTAT00000012897	165402	141073	146679	124323
ENSBTAP00000001095	1	1	33.94	51592	0.852694	0.981994	CARKL	CARKL|UniProtKB Gene Name|Bos taurus sedoheptulokinase (SHPK), mRNA. [Source:RefSeq mRNA;Acc:NM_001075548]|19|ENSBTAG00000000829|ENSBTAT00000001095	129199	110167	52622.9	51675.3
ENSBTAP00000019973	2	1	92.28	27900	0.852527	0.628894	TBCB	TBCB|UniProtKB Gene Name|Bos taurus tubulin folding cofactor B (TBCB), mRNA. [Source:RefSeq mRNA;Acc:NM_001014939]|18|ENSBTAG00000015004|ENSBTAT00000019973	111180	94783.6	194877	122557
ENSBTAP00000015646	1	1	53.77	59865	0.850929	0.492511	FGR	FGR|UniProtKB Gene Name|Bos taurus Gardner-Rasheed feline sarcoma viral (v-fgr) oncogene homolog (FGR), mRNA. [Source:RefSeq mRNA;Acc:NM_001098991]|2|ENSBTAG00000011784|ENSBTAT00000015646	31588.5	26879.5	26972.6	13284.3
ENSBTAP00000013990	1	1	34.62	11418	0.850524	0.812416	SH3BGRL	SH3BGRL|UniProtKB Gene Name|Bos taurus SH3 domain binding glutamic acid-rich protein like (SH3BGRL), mRNA. [Source:RefSeq mRNA;Acc:NM_001035440]|X|ENSBTAG00000010587|ENSBTAT00000013990	39059.2	33220.8	30150.1	24494.4
ENSBTAP00000016093	17	13	847.3	51103	0.849889	0.845399	GDI1	GDI1|UniProtKB Gene Name|Bos taurus GDP dissociation inhibitor 1 (GDI1), mRNA. [Source:RefSeq mRNA;Acc:NM_174064]|X|ENSBTAG00000012125|ENSBTAT00000016093	6.55838e+06	5.5739e+06	7.46729e+06	6.31284e+06
ENSBTAP00000042228	10	9	512.88	57039	0.849466	0.904853	UGP2	UGP2|UniProtKB Gene Name|Bos taurus UDP-glucose pyrophosphorylase 2 (UGP2), mRNA. [Source:RefSeq mRNA;Acc:NM_174212]|11|ENSBTAG00000000111|ENSBTAT00000044762	1.39235e+06	1.18275e+06	1.34591e+06	1.21785e+06
ENSBTAP00000023165	1	1	54.41	101498	0.849177	0.937721	PDCD6IP	PDCD6IP|HGNC Symbol|programmed cell death 6 interacting protein [Source:HGNC Symbol;Acc:8766]|22|ENSBTAG00000017426|ENSBTAT00000023165	65034.7	55226	56890.6	53347.5
ENSBTAP00000023908	1	1	35.01	18971	0.848805	1.68884	PTGES3	PTGES3|UniProtKB Gene Name|Bos taurus prostaglandin E synthase 3 (cytosolic) (PTGES3), mRNA. [Source:RefSeq mRNA;Acc:NM_001007806]|5|ENSBTAG00000017967|ENSBTAT00000023908	249540	211811	120939	204247
ENSBTAP00000030518;ENSBTAP00000024490	7	7	221.07	78375	0.847455	1.03082	PRKG1	PRKG1|UniProtKB Gene Name|Bos taurus protein kinase, cGMP-dependent, type I (PRKG1), mRNA. [Source:RefSeq mRNA;Acc:NM_174436]|26|ENSBTAG00000018404|ENSBTAT00000030539	484079	410235	544462	561240
ENSBTAP00000006866	1	1	29.06	47667	0.847211	2.43534	RPL4	RPL4|UniProtKB Gene Name|Bos taurus ribosomal protein L4 (RPL4), mRNA. [Source:RefSeq mRNA;Acc:NM_001014894]|10|ENSBTAG00000005211|ENSBTAT00000006866	9578.25	8114.8	4009.52	9764.55
ENSBTAP00000028655	13	13	835.79	59849	0.846896	0.885161	PSAP	PSAP|UniProtKB Gene Name|Bos taurus prosaposin (PSAP), mRNA. [Source:RefSeq mRNA;Acc:NM_174161]|28|ENSBTAG00000021499|ENSBTAT00000028655	4.55334e+06	3.85621e+06	4.01927e+06	3.5577e+06
ENSBTAP00000028254	2	2	99.73	41269	0.846497	0.905924	ACOT7	ACOT7|UniProtKB Gene Name|Bos taurus acyl-CoA thioesterase 7 (ACOT7), mRNA. [Source:RefSeq mRNA;Acc:NM_001075682]|16|ENSBTAG00000021202|ENSBTAT00000028254	152898	129428	202215	183191
ENSBTAP00000026582	3	2	87.62	22493	0.846255	0.632015	CMPK1	CMPK1|UniProtKB Gene Name|Bos taurus cytidine monophosphate (UMP-CMP) kinase 1, cytosolic (CMPK1), mRNA. [Source:RefSeq mRNA;Acc:NM_001046044]|3|ENSBTAG00000019956|ENSBTAT00000026582	160782	136062	104429	66000.6
ENSBTAP00000014306;ENSBTAP00000014304;ENSBTAP00000011047	20	20	1088.11	17121	0.845533	0.852112	MYL6	MYL6|UniProtKB Gene Name|Bos taurus myosin, light chain 6, alkali, smooth muscle and non-muscle (MYL6), mRNA. [Source:RefSeq mRNA;Acc:NM_175780]|5|ENSBTAG00000010799|ENSBTAT00000014306	2.87271e+07	2.42897e+07	3.72062e+07	3.17038e+07
ENSBTAP00000021559	2	2	64.54	70534	0.845121	1.06715	CLINT1	CLINT1|UniProtKB Gene Name|Bos taurus clathrin interactor 1 (CLINT1), mRNA. [Source:RefSeq mRNA;Acc:NM_001105417]|7|ENSBTAG00000016199|ENSBTAT00000021559	105741	89363.5	89722.1	95746.5
ENSBTAP00000049263	1	1	51.49	25443	0.844505	0.219623	VPS28	VPS28|HGNC Symbol|vacuolar protein sorting 28 homolog (S. cerevisiae) [Source:HGNC Symbol;Acc:18178]|14|ENSBTAG00000026320|ENSBTAT00000054515	26353.4	22255.6	46169.7	10139.9
ENSBTAP00000017775;ENSBTAP00000022510	34	34	2147.26	51512	0.844274	0.7277	CAP1	CAP1|UniProtKB Gene Name|Bos taurus CAP, adenylate cyclase-associated protein 1 (yeast) (CAP1), mRNA. [Source:RefSeq mRNA;Acc:NM_001035010]|3|ENSBTAG00000013363|ENSBTAT00000017775	5.03295e+07	4.24919e+07	5.91405e+07	4.30365e+07
ENSBTAP00000020809	12	10	390.26	63070	0.843382	0.912803	STIP1	STIP1|UniProtKB Gene Name|Bos taurus stress-induced-phosphoprotein 1 (STIP1), mRNA. [Source:RefSeq mRNA;Acc:NM_001035492]|29|ENSBTAG00000015663|ENSBTAT00000020809	1.71829e+06	1.44918e+06	1.78769e+06	1.63181e+06
ENSBTAP00000033176	1	1	21.95	114521	0.843233	0.896608	INPP5B	INPP5B|HGNC Symbol|inositol polyphosphate-5-phosphatase, 75kDa [Source:HGNC Symbol;Acc:6077]|3|ENSBTAG00000024107|ENSBTAT00000033256	20495.4	17282.4	27063.9	24265.7
ENSBTAP00000014566	10	6	501.8	40277	0.842649	0.756209	MGC142792	MGC142792|UniProtKB Gene Name|Bos taurus LIM and senescent cell antigen-like domains 1 (LIMS1), mRNA. [Source:RefSeq mRNA;Acc:NM_001083495]|11|ENSBTAG00000010971|ENSBTAT00000014566	2.81462e+06	2.37174e+06	3.38446e+06	2.55936e+06
ENSBTAP00000012655	14	14	601.55	38873	0.842612	1.26322	ANXA2	ANXA2|UniProtKB Gene Name|Bos taurus annexin A2 (ANXA2), mRNA. [Source:RefSeq mRNA;Acc:NM_174716]|10|ENSBTAG00000009615|ENSBTAT00000012655	4.96656e+06	4.18488e+06	1.39107e+06	1.75722e+06
ENSBTAP00000013451	5	4	275.38	23786	0.841841	0.723429	RAB7A	RAB7A|HGNC Symbol|RAB7A, member RAS oncogene family [Source:HGNC Symbol;Acc:9788]|22|ENSBTAG00000010193|ENSBTAT00000013451	765559	644479	975488	705697
ENSBTAP00000047181	8	8	511.73	42977	0.841148	0.745888	CKB	CKB|UniProtKB Gene Name|Bos taurus creatine kinase, brain (CKB), mRNA. [Source:RefSeq mRNA;Acc:NM_001015613]|21|ENSBTAG00000035998|ENSBTAT00000050490	1.14784e+06	965506	712102	531148
ENSBTAP00000022017	15	15	817.72	31032	0.841096	0.87234	FERMT3	||Fermitin family homolog 3 [Source:UniProtKB/TrEMBL;Acc:F1MMJ5]|29|ENSBTAG00000016551|ENSBTAT00000022017	1.42171e+07	1.19579e+07	1.53578e+07	1.33972e+07
ENSBTAP00000014850	16	14	1039.89	36254	0.840949	0.830387	PDLIM1	PDLIM1|UniProtKB Gene Name|Bos taurus PDZ and LIM domain 1 (PDLIM1), mRNA. [Source:RefSeq mRNA;Acc:NM_001035455]|26|ENSBTAG00000011182|ENSBTAT00000014850	8.9835e+06	7.55467e+06	1.14889e+07	9.54021e+06
ENSBTAP00000002650	1	1	13.73	39683	0.840718	1.06535	PSMD13	PSMD13|EntrezGene|Bos taurus proteasome (prosome, macropain) 26S subunit, non-ATPase, 13 (PSMD13), mRNA. [Source:RefSeq mRNA;Acc:NM_001024532]|11|ENSBTAG00000002045|ENSBTAT00000002650	22110.2	18588.5	16622.1	17708.4
ENSBTAP00000055469	3	3	108.58	36499	0.840282	0.670272	IGHG4	||Uncharacterized protein [Source:UniProtKB/TrEMBL;Acc:G3N0V0]|20|ENSBTAG00000048135|ENSBTAT00000066155	6.28595e+06	5.28198e+06	4.57189e+06	3.06441e+06
ENSBTAP00000003660	3	3	156.79	41657	0.840118	0.971915	ACAT2	ACAT2|UniProtKB Gene Name|Bos taurus acetyl-CoA acetyltransferase 2 (ACAT2), mRNA. [Source:RefSeq mRNA;Acc:NM_001075549]|9|ENSBTAG00000002827|ENSBTAT00000003660	425649	357595	448875	436269
ENSBTAP00000020161	5	5	178.02	36262	0.839944	1.05799	GRAP2	GRAP2|HGNC Symbol|GRB2-related adaptor protein 2 [Source:HGNC Symbol;Acc:4563]|5|ENSBTAG00000015157|ENSBTAT00000020161	619788	520587	519839	549983
ENSBTAP00000018649	2	2	81.69	38370	0.8399	0.920716	CGN1	CGN1|UniProtKB Gene Name|Bos taurus conglutinin (CGN1), mRNA. [Source:RefSeq mRNA;Acc:NM_175699]|28|ENSBTAG00000006536|ENSBTAT00000018649	156247	131232	177158	163112
ENSBTAP00000026345	5	5	147.11	42963	0.839466	1.40054	APOA4	APOA4|HGNC Symbol|apolipoprotein A-IV [Source:HGNC Symbol;Acc:602]|15|ENSBTAG00000019770|ENSBTAT00000026345	312949	262710	116462	163110
ENSBTAP00000049383;ENSBTAP00000041048	6	4	277.34	37987	0.837598	0.998917	PCBP1	PCBP1|UniProtKB Gene Name|Bos taurus poly(rC) binding protein 1 (PCBP1), mRNA. [Source:RefSeq mRNA;Acc:NM_001015565]|11|ENSBTAG00000008985|ENSBTAT00000011824	1.62184e+06	1.35845e+06	1.07279e+06	1.07163e+06
ENSBTAP00000037577	17	14	1012.39	36073	0.83747	0.861101	G3PDH	G3PDH|UniProtKB Gene Name|Bos taurus glyceraldehyde-3-phosphate dehydrogenase (GAPDH), mRNA. [Source:RefSeq mRNA;Acc:NM_001034034]|5|ENSBTAG00000014731|ENSBTAT00000037753	2.83789e+07	2.37665e+07	2.76985e+07	2.38512e+07
ENSBTAP00000003716	2	2	87.88	42561	0.835671	1.15406	ACAA2	ACAA2|UniProtKB Gene Name|Bos taurus acetyl-CoA acyltransferase 2 (ACAA2), mRNA. [Source:RefSeq mRNA;Acc:NM_001035342]|24|ENSBTAG00000002863|ENSBTAT00000003716	215367	179976	167605	193426
ENSBTAP00000002492	3	3	136.32	39531	0.835493	0.745627	APOH	APOH|UniProtKB Gene Name|Bos taurus apolipoprotein H (beta-2-glycoprotein I) (APOH), mRNA. [Source:RefSeq mRNA;Acc:NM_173992]|19|ENSBTAG00000001915|ENSBTAT00000002492	324417	271048	320152	238714
ENSBTAP00000023627	1	1	64.05	25789	0.835034	0.874596	GSTM1	GSTM1|UniProtKB Gene Name|Bos taurus glutathione S-transferase M1 (GSTM1), mRNA. [Source:RefSeq mRNA;Acc:NM_175825]|3|ENSBTAG00000017765|ENSBTAT00000023627	156998	131098	150130	131303
ENSBTAP00000001646	1	1	34.3	113954	0.833642	0.87283	ATP1A1	ATP1A1|EntrezGene|Bos taurus ATPase, Na+/K+ transporting, alpha 1 polypeptide (ATP1A1), mRNA. [Source:RefSeq mRNA;Acc:NM_001076798]|3|ENSBTAG00000001246|ENSBTAT00000001646	102590	85523.1	70820.6	61814.3
ENSBTAP00000009005	2	2	71.88	36122	0.833306	1.42722	LGALS9	LGALS9|UniProtKB Gene Name|Bos taurus lectin, galactoside-binding, soluble, 9 (LGALS9), transcript variant 2, mRNA. [Source:RefSeq mRNA;Acc:NM_001015570]|19|ENSBTAG00000006846|ENSBTAT00000009005	100405	83668.4	35792.9	51084.5
ENSBTAP00000026871	1	1	19.69	22507	0.833229	0.887899	UBE2K	UBE2K|UniProtKB Gene Name|Bos taurus ubiquitin-conjugating enzyme E2K (UBE2K), mRNA. [Source:RefSeq mRNA;Acc:NM_174080]|6|ENSBTAG00000020175|ENSBTAT00000026871	97362.8	81125.5	67629.1	60047.8
ENSBTAP00000001373	5	1	209.83	97674	0.833128	0.664235	PYGM	PYGM|HGNC Symbol|phosphorylase, glycogen, muscle [Source:HGNC Symbol;Acc:9726]|29|ENSBTAG00000001032|ENSBTAT00000001373	97696.1	81393.3	121118	80450.8
ENSBTAP00000000289;ENSBTAP00000050261	19	13	1257.24	27899	0.83283	0.954519	YWHAZ	YWHAZ|UniProtKB Gene Name|Bos taurus tyrosine 3-monooxygenase/tryptophan 5-monooxygenase activation protein, zeta polypeptide (YWHAZ), mRNA. [Source:RefSeq mRNA;Acc:NM_174814]|14|ENSBTAG00000000236|ENSBTAT00000000289	4.389e+07	3.65529e+07	4.45665e+07	4.25396e+07
ENSBTAP00000048477	18	17	616.53	587050	0.831884	1.34871	AHNAK	AHNAK|HGNC Symbol|AHNAK nucleoprotein [Source:HGNC Symbol;Acc:347]|29|ENSBTAG00000013468|ENSBTAT00000052103	3.2408e+06	2.69597e+06	1.55473e+06	2.09688e+06
ENSBTAP00000009415	2	2	78.94	26014	0.829794	0.822836	C1QA	C1QA|UniProtKB Gene Name|Bos taurus complement component 1, q subcomponent, A chain (C1QA), mRNA. [Source:RefSeq mRNA;Acc:NM_001014945]|2|ENSBTAG00000007153|ENSBTAT00000009415	247706	205545	634655	522217
ENSBTAP00000036487;ENSBTAP00000053521	174	173	12445.1	272813	0.829494	0.812052	TLN1	TLN1|HGNC Symbol|talin 1 [Source:HGNC Symbol;Acc:11845]|8|ENSBTAG00000025868|ENSBTAT00000036631	2.10709e+08	1.74782e+08	2.57769e+08	2.09322e+08
ENSBTAP00000044733	16	15	729.02	80683	0.828789	0.818359	CAPN2	CAPN2|UniProtKB Gene Name|Bos taurus calpain 2, (m/II) large subunit (CAPN2), mRNA. [Source:RefSeq mRNA;Acc:NM_001103086]|16|ENSBTAG00000012778|ENSBTAT00000047532	1.38683e+06	1.14939e+06	1.43017e+06	1.17039e+06
ENSBTAP00000031165;ENSBTAP00000041616	5	5	327.65	24885	0.827958	0.81291	IGLL1	IGLL1|EntrezGene|Bos taurus immunoglobulin lambda-like polypeptide 1 (IGLL1), mRNA. [Source:RefSeq mRNA;Acc:NM_001083800]|17|ENSBTAG00000031160|ENSBTAT00000031209	1.64753e+07	1.36408e+07	1.74916e+07	1.42191e+07
ENSBTAP00000042255	10	2	296.11	24547	0.827295	1.47171	TPM1	TPM1|EntrezGene|Bos taurus tropomyosin 1 (alpha) (TPM1), mRNA. [Source:RefSeq mRNA;Acc:NM_001013590]|10|ENSBTAG00000005373|ENSBTAT00000044796	545375	451185	401235	590502
ENSBTAP00000005982;ENSBTAP00000015186;ENSBTAP00000043502	16	10	547.27	32975	0.827246	1.02346	TPM4	TPM4|HGNC Symbol|tropomyosin 4 [Source:HGNC Symbol;Acc:12013]|7|ENSBTAG00000004553|ENSBTAT00000005982	1.81432e+07	1.50088e+07	1.71943e+07	1.75977e+07
ENSBTAP00000043732	3	3	121.79	32057	0.827092	1.17407	PITPNA	PITPNA|UniProtKB Gene Name|Bos taurus phosphatidylinositol transfer protein, alpha (PITPNA), mRNA. [Source:RefSeq mRNA;Acc:NM_001046582]|19|ENSBTAG00000011480|ENSBTAT00000046430	220027	181983	139486	163767
ENSBTAP00000039209	11	11	457.22	31518	0.82677	0.90209	RSU1	RSU1|UniProtKB Gene Name|Bos taurus Ras suppressor protein 1 (RSU1), mRNA. [Source:RefSeq mRNA;Acc:NM_001040601]|13|ENSBTAG00000027446|ENSBTAT00000039415	1.08107e+07	8.93799e+06	1.23326e+07	1.11251e+07
ENSBTAP00000013173	29	29	1547.59	89673	0.826015	0.579131	INTB3	INTB3|UniProtKB Gene Name|Bos taurus integrin, beta 3 (platelet glycoprotein IIIa, antigen CD61) (ITGB3), mRNA. [Source:RefSeq mRNA;Acc:NM_001206490]|19|ENSBTAG00000009987|ENSBTAT00000013173	2.00477e+07	1.65597e+07	2.60929e+07	1.51112e+07
ENSBTAP00000022970	1	1	14.04	28067	0.825608	1.03257	VAPA	VAPA|UniProtKB Gene Name|Bos taurus VAMP (vesicle-associated membrane protein)-associated protein A, 33kDa (VAPA), mRNA. [Source:RefSeq mRNA;Acc:NM_001075733]|24|ENSBTAG00000017279|ENSBTAT00000022970	107548	88792.4	69735.4	72006.7
ENSBTAP00000010922;ENSBTAP00000010925	32	32	1505.07	265798	0.825482	0.72746	FN1	FN1|UniProtKB Gene Name|Bos taurus fibronectin 1 (FN1), mRNA. [Source:RefSeq mRNA;Acc:NM_001163778]|2|ENSBTAG00000008300|ENSBTAT00000010922	1.07723e+07	8.89234e+06	5.42658e+06	3.94762e+06
ENSBTAP00000018555	1	1	14	30500	0.82332	1.20034	BCL2L13	BCL2L13|HGNC Symbol|BCL2-like 13 (apoptosis facilitator) [Source:HGNC Symbol;Acc:17164]|5|ENSBTAG00000013956|ENSBTAT00000018555	67564.5	55627.2	45437.2	54540.2
ENSBTAP00000010347	2	2	70.6	32731	0.822564	1.3371	GNPDA1	GNPDA1|UniProtKB Gene Name|Bos taurus glucosamine-6-phosphate deaminase 1 (GNPDA1), mRNA. [Source:RefSeq mRNA;Acc:NM_001080287]|7|ENSBTAG00000007865|ENSBTAT00000010347	205517	169051	62676	83804.4
ENSBTAP00000003821	1	1	16	73105	0.821697	0.524311	EMR3	EMR3|HGNC Symbol|egf-like module containing, mucin-like, hormone receptor-like 3 [Source:HGNC Symbol;Acc:23647]|7|ENSBTAG00000002937|ENSBTAT00000003821	27346	22470.2	44078.1	23110.6
ENSBTAP00000028988	15	15	830.13	36109	0.821644	0.823139	ANXA5	ANXA5|EntrezGene|Bos taurus annexin A5 (ANXA5), mRNA. [Source:RefSeq mRNA;Acc:NM_001040477]|6|ENSBTAG00000021746|ENSBTAT00000028988	1.0151e+07	8.34052e+06	6.45898e+06	5.31664e+06
ENSBTAP00000052156;ENSBTAP00000037730	5	5	192.12	40015	0.820969	0.807061	CAB39	CAB39|UniProtKB Gene Name|Bos taurus calcium binding protein 39 (CAB39), mRNA. [Source:RefSeq mRNA;Acc:NM_001046087]|2|ENSBTAG00000040055|ENSBTAT00000053463	565714	464433	702048	566595
ENSBTAP00000018331	7	5	244.91	149720	0.820795	1.10915	NEDD4	NEDD4|HGNC Symbol|neural precursor cell expressed, developmentally down-regulated 4, E3 ubiquitin protein ligase [Source:HGNC Symbol;Acc:7727]|10|ENSBTAG00000013793|ENSBTAT00000018331	431961	354552	509689	565323
ENSBTAP00000046611	2	1	40.22	24662	0.819872	0.717579	RAB4A	RAB4A|UniProtKB Gene Name|Bos taurus RAB4A, member RAS oncogene family (RAB4A), mRNA. [Source:RefSeq mRNA;Acc:NM_001038685]|28|ENSBTAG00000018857|ENSBTAT00000049768	38668.7	31703.4	48009.3	34450.5
ENSBTAP00000010507	14	13	464.87	53776	0.819128	0.794301	CORO1C	CORO1C|UniProtKB Gene Name|Bos taurus coronin, actin binding protein, 1C (CORO1C), mRNA. [Source:RefSeq mRNA;Acc:NM_001081590]|17|ENSBTAG00000007993|ENSBTAT00000010507	2.2474e+06	1.84091e+06	2.03863e+06	1.61929e+06
ENSBTAP00000030179;ENSBTAP00000029348	138	127	9279.21	283841	0.819125	0.822025	FLNA	FLNA|HGNC Symbol|filamin A, alpha [Source:HGNC Symbol;Acc:3754]|X|ENSBTAG00000011190|ENSBTAT00000030194	3.5241e+08	2.88668e+08	3.55171e+08	2.9196e+08
ENSBTAP00000015056	1	1	16.35	46256	0.818878	0.964769	OLFML3	OLFML3|UniProtKB Gene Name|Bos taurus olfactomedin-like 3 (OLFML3), mRNA. [Source:RefSeq mRNA;Acc:NM_001075197]|3|ENSBTAG00000011327|ENSBTAT00000015056	49613.3	40627.2	30952.2	29861.7
ENSBTAP00000026703	2	2	83.17	92214	0.818487	1.20268	ARHGAP17	ARHGAP17|HGNC Symbol|Rho GTPase activating protein 17 [Source:HGNC Symbol;Acc:18239]|25|ENSBTAG00000020043|ENSBTAT00000026703	100830	82528.4	80433.8	96736.5
ENSBTAP00000028486	4	1	159.72	17528	0.818052	1.90356	ANP32B	ANP32B|EntrezGene|Bos taurus acidic (leucine-rich) nuclear phosphoprotein 32 family, member B (ANP32B), mRNA. [Source:RefSeq mRNA;Acc:NM_001035074]|8|ENSBTAG00000021367|ENSBTAT00000028486	74215.5	60712.2	16860.3	32094.6
ENSBTAP00000006460	9	9	423.74	71653	0.816663	0.77991	GP1BA	GP1BA|HGNC Symbol|glycoprotein Ib (platelet), alpha polypeptide [Source:HGNC Symbol;Acc:4439]|19|ENSBTAG00000004909|ENSBTAT00000006460	9.86852e+06	8.05926e+06	9.30013e+06	7.25327e+06
ENSBTAP00000015248	13	4	699.48	19889	0.815332	1.01501	MYL9	MYL9|UniProtKB Gene Name|Bos taurus myosin, light chain 9, regulatory (MYL9), mRNA. [Source:RefSeq mRNA;Acc:NM_001075234]|13|ENSBTAG00000011473|ENSBTAT00000015248	5.81369e+06	4.74009e+06	5.90187e+06	5.99046e+06
ENSBTAP00000019385	3	3	115.23	129949	0.815026	0.716289	MYLK	MYLK|EntrezGene|myosin light chain kinase, smooth muscle [Source:RefSeq peptide;Acc:NP_788809]|1|ENSBTAG00000014567|ENSBTAT00000019385	404685	329829	578363	414275
ENSBTAP00000022319	11	11	377.81	161210	0.814699	0.918363	CLIP1	CLIP1|HGNC Symbol|CAP-GLY domain containing linker protein 1 [Source:HGNC Symbol;Acc:10461]|17|ENSBTAG00000016779|ENSBTAT00000022319	734184	598139	719605	660859
ENSBTAP00000016204	1	1	64.31	190751	0.814177	1.25582	C5	C5|EntrezGene|complement C5a anaphylatoxin precursor [Source:RefSeq peptide;Acc:NP_001160088]|8|ENSBTAG00000012210|ENSBTAT00000016204	21731.7	17693.4	41921.1	52645.3
ENSBTAP00000012740	2	1	81.26	391378	0.813992	1.24619	UTRN	UTRN|HGNC Symbol|utrophin [Source:HGNC Symbol;Acc:12635]|9|ENSBTAG00000009665|ENSBTAT00000012740	30117.7	24515.6	24697.6	30777.9
ENSBTAP00000024448;ENSBTAP00000014091;ENSBTAP00000005625	11	11	456.2	62638	0.81364	1.22147	DPYSL2	DPYSL2|UniProtKB Gene Name|Bos taurus dihydropyrimidinase-like 2 (DPYSL2), mRNA. [Source:RefSeq mRNA;Acc:NM_001076000]|8|ENSBTAG00000018373|ENSBTAT00000024448	1.87776e+06	1.52782e+06	782191	955419
ENSBTAP00000020055	1	1	28.04	45907	0.813321	0.953313	LANCL1	LANCL1|EntrezGene|Bos taurus LanC lantibiotic synthetase component C-like 1 (bacterial) (LANCL1), mRNA. [Source:RefSeq mRNA;Acc:NM_001076227]|2|ENSBTAG00000015066|ENSBTAT00000020055	44786	36425.4	31103.9	29651.8
ENSBTAP00000025308	7	6	309.38	62499	0.813029	0.860075	PGM1	PGM1|UniProtKB Gene Name|Bos taurus phosphoglucomutase 1 (PGM1), mRNA. [Source:RefSeq mRNA;Acc:NM_001076903]|3|ENSBTAG00000019011|ENSBTAT00000025308	887568	721619	951643	818484
ENSBTAP00000020908	3	3	72.82	15816	0.812321	0.725505	SYNJ2BP	SYNJ2BP|EntrezGene|Bos taurus synaptojanin 2 binding protein (SYNJ2BP), mRNA. [Source:RefSeq mRNA;Acc:NM_001035355]|10|ENSBTAG00000007586|ENSBTAT00000020908	103675	84217.4	146583	106346
ENSBTAP00000024134	3	3	119.08	199742	0.811651	0.627854	MAP-2	MAP-2|UniProtKB Gene Name|microtubule-associated protein 2 [Source:RefSeq peptide;Acc:NP_001192736]|2|ENSBTAG00000018130|ENSBTAT00000024134	174697	141793	274922	172611
ENSBTAP00000022210	40	40	2315.58	191527	0.810974	0.879055	CLTC	CLTC|EntrezGene|clathrin heavy chain 1 [Source:RefSeq peptide;Acc:NP_776448]|19|ENSBTAG00000016708|ENSBTAT00000022210	7.76296e+06	6.29556e+06	7.85704e+06	6.90677e+06
ENSBTAP00000029307;ENSBTAP00000000935	12	12	820	37599	0.808487	0.84871	PARVB	PARVB|UniProtKB Gene Name|Bos taurus parvin, beta (PARVB), mRNA. [Source:RefSeq mRNA;Acc:NM_001102299]|5|ENSBTAG00000021978|ENSBTAT00000029307	1.06626e+07	8.62058e+06	1.19224e+07	1.01186e+07
ENSBTAP00000002653;ENSBTAP00000033929	11	11	499.43	69026	0.807553	0.795127	PTPN11	PTPN11|HGNC Symbol|protein tyrosine phosphatase, non-receptor type 11 [Source:HGNC Symbol;Acc:9644]|17|ENSBTAG00000002048|ENSBTAT00000002653	1.42399e+06	1.14995e+06	1.76108e+06	1.40028e+06
ENSBTAP00000045951;ENSBTAP00000021524	6	6	214.78	79232	0.807247	0.672151	APP	APP|UniProtKB Gene Name|Bos taurus amyloid beta (A4) precursor protein (APP), mRNA. [Source:RefSeq mRNA;Acc:NM_001076796]|1|ENSBTAG00000017753|ENSBTAT00000049004	651494	525917	671437	451307
ENSBTAP00000017739	1	1	45.5	21360	0.807201	0.554531	BAX	BAX|UniProtKB Gene Name|Bos taurus BCL2-associated X protein (BAX), mRNA. [Source:RefSeq mRNA;Acc:NM_173894]|18|ENSBTAG00000013340|ENSBTAT00000017739	50075	40420.6	74705.3	41426.4
ENSBTAP00000025774	1	1	42.33	71050	0.806595	0.613627	SLC6A4	SLC6A4|EntrezGene|Bos taurus solute carrier family 6 (neurotransmitter transporter, serotonin), member 4 (SLC6A4), mRNA. [Source:RefSeq mRNA;Acc:NM_174609]|19|ENSBTAG00000019349|ENSBTAT00000025774	99935.2	80607.3	151606	93029.8
ENSBTAP00000056049	1	1	100.11	12219	0.806514	0.754677	IGLL1	IGLL1|EntrezGene|Bos taurus immunoglobulin lambda-like polypeptide 1 (IGLL1), mRNA. [Source:RefSeq mRNA;Acc:NM_001083800]|17|ENSBTAG00000031160|ENSBTAT00000065780	1.85336e+06	1.49476e+06	961517	725635
ENSBTAP00000008765;ENSBTAP00000008760;ENSBTAP00000002151	11	11	365.84	90133	0.806142	0.818764	EPB41	EPB41|EntrezGene|Bos taurus erythrocyte membrane protein band 4.1 (elliptocytosis 1, RH-linked) (EPB41), mRNA. [Source:RefSeq mRNA;Acc:NM_174311]|2|ENSBTAG00000006667|ENSBTAT00000008765	1.52737e+06	1.23127e+06	1.88611e+06	1.54428e+06
ENSBTAP00000026435	7	7	342.17	193911	0.805766	0.667351	LTBP1	LTBP1|EntrezGene|Bos taurus latent transforming growth factor beta binding protein 1 (LTBP1), mRNA. [Source:RefSeq mRNA;Acc:NM_001103091]|11|ENSBTAG00000019839|ENSBTAT00000026435	474099	382013	649895	433708
ENSBTAP00000001128	2	2	99.06	22981	0.805671	0.693048	PPP1R2	PPP1R2|EntrezGene|Bos taurus protein phosphatase 1, regulatory (inhibitor) subunit 2 (PPP1R2), mRNA. [Source:RefSeq mRNA;Acc:NM_001035392]|1|ENSBTAG00000006724|ENSBTAT00000001128	145087	116892	157103	108880
ENSBTAP00000015689	1	1	52.65	55017	0.80557	1.26351	DAPK2	DAPK2|HGNC Symbol|death-associated protein kinase 2 [Source:HGNC Symbol;Acc:2675]|10|ENSBTAG00000011820|ENSBTAT00000015689	64787.5	52190.9	68283.9	86277.6
ENSBTAP00000047621	2	2	60.03	29390	0.8051	1.33997	LHPP	LHPP|UniProtKB Gene Name|Bos taurus phospholysine phosphohistidine inorganic pyrophosphate phosphatase (LHPP), mRNA. [Source:RefSeq mRNA;Acc:NM_001080912]|26|ENSBTAG00000010957|ENSBTAT00000056613	463481	373149	330020	442216
ENSBTAP00000000259;ENSBTAP00000003589	6	2	264.78	38151	0.804947	0.749376	GNB1	GNB1|UniProtKB Gene Name|Bos taurus guanine nucleotide binding protein (G protein), beta polypeptide 1 (GNB1), mRNA. [Source:RefSeq mRNA;Acc:NM_175777]|16|ENSBTAG00000000215|ENSBTAT00000000259	106686	85876.4	155062	116200
ENSBTAP00000010928;ENSBTAP00000054770	5	4	240.49	11959	0.80493	0.740892	FKBP1A	FKBP1A|UniProtKB Gene Name|Bos taurus FK506 binding protein 1A, 12kDa (FKBP1A), mRNA. [Source:RefSeq mRNA;Acc:NM_001035456]|13|ENSBTAG00000008303|ENSBTAT00000010928	3.60928e+06	2.90522e+06	3.2807e+06	2.43064e+06
ENSBTAP00000004559	6	6	317.78	52403	0.804453	0.86481	GSS	GSS|UniProtKB Gene Name|Bos taurus glutathione synthetase (GSS), mRNA. [Source:RefSeq mRNA;Acc:NM_001015630]|13|ENSBTAG00000003504|ENSBTAT00000004559	807173	649333	742156	641824
ENSBTAP00000018027	17	17	839.11	124528	0.804022	0.752224	UNC13D	UNC13D|HGNC Symbol|unc-13 homolog D (C. elegans) [Source:HGNC Symbol;Acc:23147]|19|ENSBTAG00000013556|ENSBTAT00000018027	1.73871e+06	1.39796e+06	2.33979e+06	1.76005e+06
ENSBTAP00000007442	18	14	1035.03	29326	0.803751	1.01988	YWHAE	YWHAE|UniProtKB Gene Name|Bos taurus tyrosine 3-monooxygenase/tryptophan 5-monooxygenase activation protein, epsilon polypeptide (YWHAE), mRNA. [Source:RefSeq mRNA;Acc:NM_174491]|19|ENSBTAG00000005664|ENSBTAT00000007442	1.51349e+07	1.21647e+07	1.32332e+07	1.34963e+07
ENSBTAP00000041673	18	18	853.14	123350	0.802787	0.829147	FAM62A	FAM62A|UniProtKB Gene Name|Bos taurus extended synaptotagmin-like protein 1 (ESYT1), mRNA. [Source:RefSeq mRNA;Acc:NM_001077943]|5|ENSBTAG00000009543|ENSBTAT00000044160	2.77383e+06	2.2268e+06	2.81278e+06	2.3322e+06
ENSBTAP00000003206;ENSBTAP00000025235	8	8	482.37	24588	0.802655	0.880528	RAB11B	RAB11B|UniProtKB Gene Name|Bos taurus RAB11B, member RAS oncogene family (RAB11B), mRNA. [Source:RefSeq mRNA;Acc:NM_001035391]|7|ENSBTAG00000002475|ENSBTAT00000003206	4.72162e+06	3.78983e+06	4.99496e+06	4.3982e+06
ENSBTAP00000043307	2	2	93.4	161821	0.802156	0.840555	FHOD1	FHOD1|HGNC Symbol|formin homology 2 domain containing 1 [Source:HGNC Symbol;Acc:17905]|18|ENSBTAG00000032427|ENSBTAT00000045966	220460	176844	257285	216262
ENSBTAP00000026334	1	1	27.64	101858	0.800496	0.658626	MANBA	MANBA|UniProtKB Gene Name|Bos taurus mannosidase, beta A, lysosomal (MANBA), mRNA. [Source:RefSeq mRNA;Acc:NM_174387]|6|ENSBTAG00000019761|ENSBTAT00000026334	10369.9	8301.07	2987.65	1967.74
ENSBTAP00000016300;ENSBTAP00000038032	2	2	91.37	30425	0.79995	1.35672	AKR7A2	AKR7A2|EntrezGene|Bos taurus aldo-keto reductase family 7, member A2 (aflatoxin aldehyde reductase) (AKR7A2), mRNA. [Source:RefSeq mRNA;Acc:NM_001101949]|2|ENSBTAG00000012289|ENSBTAT00000016300	435758	348585	164198	222772
ENSBTAP00000023671	5	4	141.67	24110	0.799783	0.844672	RAB14	RAB14|UniProtKB Gene Name|Bos taurus RAB14, member RAS oncogene family (RAB14), mRNA. [Source:RefSeq mRNA;Acc:NM_001130754]|8|ENSBTAG00000017803|ENSBTAT00000023671	437168	349640	415176	350688
ENSBTAP00000002145	24	24	1549.16	67470	0.799652	1.14219	FGA	FGA|UniProtKB Gene Name|Bos taurus fibrinogen alpha chain (FGA), mRNA. [Source:RefSeq mRNA;Acc:NM_001033626]|17|ENSBTAG00000001638|ENSBTAT00000002145	8.34575e+07	6.6737e+07	8.96864e+07	1.02439e+08
ENSBTAP00000011107;ENSBTAP00000055606	8	8	364.71	83452	0.79897	0.823071	NSF	NSF|HGNC Symbol|N-ethylmaleimide-sensitive factor [Source:HGNC Symbol;Acc:8016]|19|ENSBTAG00000008442|ENSBTAT00000011107	571899	456930	723883	595807
ENSBTAP00000022232	3	3	117.53	51119	0.798781	0.783603	NPEPL1	NPEPL1|EntrezGene|Bos taurus aminopeptidase-like 1 (NPEPL1), mRNA. [Source:RefSeq mRNA;Acc:NM_001034297]|13|ENSBTAG00000016724|ENSBTAT00000022232	77258.6	61712.8	95245.9	74634.9
ENSBTAP00000027682	3	3	102.65	126795	0.798392	0.976715	HMHA1	HMHA1|HGNC Symbol|histocompatibility (minor) HA-1 [Source:HGNC Symbol;Acc:17102]|7|ENSBTAG00000020772|ENSBTAT00000027682	462358	369143	720160	703391
ENSBTAP00000018091	1	1	23.49	17865	0.798318	0.922679	FKBP2	FKBP2|UniProtKB Gene Name|Bos taurus FK506 binding protein 2, 13kDa (FKBP2), transcript variant 1, mRNA. [Source:RefSeq mRNA;Acc:NM_001113256]|29|ENSBTAG00000013606|ENSBTAT00000018091	94360.8	75329.9	90542.8	83542
ENSBTAP00000034568	14	14	701.81	39864	0.797957	0.875936	SLC9A3R1	SLC9A3R1|UniProtKB Gene Name|Bos taurus solute carrier family 9 (sodium/hydrogen exchanger), member 3 regulator 1 (SLC9A3R1), mRNA. [Source:RefSeq mRNA;Acc:NM_001077852]|19|ENSBTAG00000011382|ENSBTAT00000034682	8.64338e+06	6.89704e+06	7.82716e+06	6.85609e+06
ENSBTAP00000007283;ENSBTAP00000008198	2	2	80.03	20635	0.796283	1.26719	CBX3	CBX3|EntrezGene|Bos taurus chromobox homolog 3 (CBX3), mRNA. [Source:RefSeq mRNA;Acc:NM_001101198]|1|ENSBTAG00000005540|ENSBTAT00000007283	104562	83260.8	44476.7	56360.5
ENSBTAP00000019525	4	4	231.69	20315	0.796096	0.609805	GP9	GP9|HGNC Symbol|glycoprotein IX (platelet) [Source:HGNC Symbol;Acc:4444]|22|ENSBTAG00000014666|ENSBTAT00000019525	1.49532e+06	1.19042e+06	1.7675e+06	1.07783e+06
ENSBTAP00000026119	14	14	905.39	40552	0.796074	0.89652	VASP	VASP|UniProtKB Gene Name|Bos taurus vasodilator-stimulated phosphoprotein (VASP), mRNA. [Source:RefSeq mRNA;Acc:NM_001038110]|18|ENSBTAG00000019604|ENSBTAT00000026119	1.23564e+07	9.83661e+06	1.21416e+07	1.08852e+07
ENSBTAP00000026834	6	6	251.77	82380	0.795996	1.05218	DPP3	DPP3|HGNC Symbol|dipeptidyl-peptidase 3 [Source:HGNC Symbol;Acc:3008]|29|ENSBTAG00000022242|ENSBTAT00000026834	788237	627434	507739	534233
ENSBTAP00000023026	1	1	27.94	14088	0.794848	1.09377	HDHD2	HDHD2|UniProtKB Gene Name|Bos taurus haloacid dehalogenase-like hydrolase domain containing 2 (HDHD2), mRNA. [Source:RefSeq mRNA;Acc:NM_001035022]|24|ENSBTAG00000011893|ENSBTAT00000023026	21124.4	16790.6	15822	17305.7
ENSBTAP00000006383	19	18	1093.81	25108	0.793933	0.861536	PRDX6	PRDX6|UniProtKB Gene Name|Bos taurus peroxiredoxin 6 (PRDX6), mRNA. [Source:RefSeq mRNA;Acc:NM_174643]|16|ENSBTAG00000004855|ENSBTAT00000006383	3.01105e+07	2.39057e+07	3.80302e+07	3.27644e+07
ENSBTAP00000000596	1	1	34.68	36142	0.793741	0.862159	PPP2CA	PPP2CA|UniProtKB Gene Name|Bos taurus protein phosphatase 2, catalytic subunit, alpha isozyme (PPP2CA), mRNA. [Source:RefSeq mRNA;Acc:NM_181031]|7|ENSBTAG00000000469|ENSBTAT00000000596	144419	114631	125934	108575
ENSBTAP00000016514	8	2	367.19	37681	0.793219	1.05138	PPP1CB	PPP1CB|EntrezGene|Bos taurus protein phosphatase 1, catalytic subunit, beta isozyme (PPP1CB), mRNA. [Source:RefSeq mRNA;Acc:NM_001034653]|11|ENSBTAG00000012447|ENSBTAT00000016514	183328	145419	110465	116141
ENSBTAP00000010081	1	1	74.21	125542	0.792823	1.79706	MYO1F	MYO1F|EntrezGene|Bos taurus myosin IF (MYO1F), mRNA. [Source:RefSeq mRNA;Acc:NM_001192748]|7|ENSBTAG00000007661|ENSBTAT00000010081	30454	24144.6	5350.8	9615.72
ENSBTAP00000016273	123	122	7917.56	320704	0.792304	0.736355	VWF	VWF|EntrezGene|Bos taurus von Willebrand factor (VWF), mRNA. [Source:RefSeq mRNA;Acc:NM_001205308]|5|ENSBTAG00000012265|ENSBTAT00000016273	2.56466e+08	2.03199e+08	1.54411e+08	1.13701e+08
ENSBTAP00000009715	5	5	205.32	43041	0.791572	0.88912	VAT1	VAT1|EntrezGene|Bos taurus vesicle amine transport protein 1 homolog (T. californica) (VAT1), mRNA. [Source:RefSeq mRNA;Acc:NM_001192265]|19|ENSBTAG00000007390|ENSBTAT00000009715	597653	473085	526410	468042
ENSBTAP00000033386	5	5	273.93	54918	0.790581	0.806623	GC	GC|HGNC Symbol|group-specific component (vitamin D binding protein) [Source:HGNC Symbol;Acc:4187]|6|ENSBTAG00000013718|ENSBTAT00000033473	1.40946e+06	1.11429e+06	728791	587860
ENSBTAP00000005496	1	1	34.04	27126	0.790155	0.865368	DIABLO	DIABLO|UniProtKB Gene Name|Bos taurus diablo, IAP-binding mitochondrial protein (DIABLO), mRNA. [Source:RefSeq mRNA;Acc:NM_001045882]|17|ENSBTAG00000004199|ENSBTAT00000005496	68463.7	54096.9	65741.3	56890.4
ENSBTAP00000042398	1	1	13.58	24700	0.788895	0.884311	PDCD10	PDCD10|UniProtKB Gene Name|Bos taurus programmed cell death 10 (PDCD10), mRNA. [Source:RefSeq mRNA;Acc:NM_001075259]|1|ENSBTAG00000031709|ENSBTAT00000044960	108488	85585.6	92930.1	82179.2
ENSBTAP00000016073	1	1	39.78	51919	0.787679	1.1294	ATP6AP1	ATP6AP1|UniProtKB Gene Name|Bos taurus ATPase, H+ transporting, lysosomal accessory protein 1 (ATP6AP1), mRNA. [Source:RefSeq mRNA;Acc:NM_175806]|X|ENSBTAG00000012117|ENSBTAT00000016073	72408	57034.3	48305.5	54556.2
ENSBTAP00000006069	21	17	1028.71	76638	0.787627	0.800502	PYGB	PYGB|EntrezGene|Bos taurus phosphorylase, glycogen; brain (PYGB), mRNA. [Source:RefSeq mRNA;Acc:NM_001035270]|13|ENSBTAG00000004625|ENSBTAT00000006069	3.82798e+06	3.01502e+06	4.84312e+06	3.87693e+06
ENSBTAP00000011559;ENSBTAP00000028022	2	2	49.79	77716	0.787016	2.50676	HNRNPM	||Bos taurus heterogeneous nuclear ribonucleoprotein M (HNRNPM), mRNA. [Source:RefSeq mRNA;Acc:NM_001191223]|7|ENSBTAG00000021039|ENSBTAT00000011559	60732.5	47797.5	22313.3	55934.1
ENSBTAP00000055204	1	1	27.19	21781	0.786669	1.62238	PDCD6	PDCD6|UniProtKB Gene Name|Bos taurus programmed cell death 6 (PDCD6), mRNA. [Source:RefSeq mRNA;Acc:NM_001105497]|20|ENSBTAG00000046493|ENSBTAT00000064656	26469	20822.3	13370.5	21692.1
ENSBTAP00000052671	9	9	463.87	31529	0.785046	0.520879	STOM	STOM|HGNC Symbol|stomatin [Source:HGNC Symbol;Acc:3383]|8|ENSBTAG00000038375|ENSBTAT00000052503	2.75491e+06	2.16273e+06	3.08082e+06	1.60473e+06
ENSBTAP00000001463	2	2	122.49	36094	0.784854	0.87414	ANXA4	ANXA4|UniProtKB Gene Name|Bos taurus annexin A4 (ANXA4), mRNA. [Source:RefSeq mRNA;Acc:NM_001001440]|11|ENSBTAG00000001105|ENSBTAT00000001463	147173	115509	109755	95941.1
ENSBTAP00000001086	1	1	14.4	8703	0.783738	1.07942	GNG11	GNG11|UniProtKB Gene Name|Bos taurus guanine nucleotide binding protein (G protein), gamma 11 (GNG11), mRNA. [Source:RefSeq mRNA;Acc:NM_001024523]|4|ENSBTAG00000000820|ENSBTAT00000001086	35902.5	28138.2	26717.2	28839.1
ENSBTAP00000011803	11	6	722	21040	0.78331	0.722379	RAP1B	RAP1B|UniProtKB Gene Name|Bos taurus RAP1B, member of RAS oncogene family (RAP1B), mRNA. [Source:RefSeq mRNA;Acc:NM_175824]|5|ENSBTAG00000008967|ENSBTAT00000011803	7.18119e+06	5.6251e+06	7.95784e+06	5.74858e+06
ENSBTAP00000014871	2	2	85.28	26611	0.783182	0.942422	C1QB	C1QB|UniProtKB Gene Name|Bos taurus complement component 1, q subcomponent, B chain (C1QB), mRNA. [Source:RefSeq mRNA;Acc:NM_001046599]|2|ENSBTAG00000011196|ENSBTAT00000014871	277081	217005	682326	643039
ENSBTAP00000027793	2	2	45.14	54961	0.782599	0.52868	SERPINF2	SERPINF2|UniProtKB Gene Name|Bos taurus serpin peptidase inhibitor, clade F (alpha-2 antiplasmin, pigment epithelium derived factor), member 2 (SERPINF2), mRNA. [Source:RefSeq mRNA;Acc:NM_174670]|19|ENSBTAG00000020859|ENSBTAT00000027793	191374	149769	222268	117509
ENSBTAP00000043007	1	1	38.08	48176	0.782354	0.392695	AP1M2	AP1M2|UniProtKB Gene Name|Bos taurus adaptor-related protein complex 1, mu 2 subunit (AP1M2), mRNA. [Source:RefSeq mRNA;Acc:NM_001034511]|7|ENSBTAG00000021160|ENSBTAT00000045632	40635	31791	49755.9	19538.9
ENSBTAP00000012635	1	1	13.31	10902	0.779324	0.315799	UQCRH	UQCRH|UniProtKB Gene Name|Bos taurus ubiquinol-cytochrome c reductase hinge protein (UQCRH), mRNA. [Source:RefSeq mRNA;Acc:NM_001034745]|3|ENSBTAG00000009603|ENSBTAT00000012635	13036.3	10159.5	23798.7	7515.62
ENSBTAP00000015277	21	19	1247.68	97793	0.777701	0.811726	PYGL	PYGL|UniProtKB Gene Name|Bos taurus phosphorylase, glycogen, liver (PYGL), mRNA. [Source:RefSeq mRNA;Acc:NM_001075203]|10|ENSBTAG00000011494|ENSBTAT00000015277	8.18679e+06	6.36688e+06	6.92506e+06	5.62125e+06
ENSBTAP00000006532;ENSBTAP00000019461;ENSBTAP00000020520	19	2	1000.3	42366	0.776095	0.905371	ACTA1	ACTA1|UniProtKB Gene Name|Bos taurus actin, alpha 1, skeletal muscle (ACTA1), mRNA. [Source:RefSeq mRNA;Acc:NM_174225]|28|ENSBTAG00000046332|ENSBTAT00000006532	1.01078e+08	7.84463e+07	9.64745e+07	8.73452e+07
ENSBTAP00000017984	5	5	175.43	25331	0.774228	0.593369	C6ORF25	C6ORF25|UniProtKB Gene Name|Bos taurus chromosome 23 open reading frame, human C6orf25 (C23H6orf25), mRNA. [Source:RefSeq mRNA;Acc:NM_001078081]|23|ENSBTAG00000013525|ENSBTAT00000017984	962579	745256	887682	526723
ENSBTAP00000018808	2	1	46.89	40796	0.773012	1.02803	RCSD1	RCSD1|HGNC Symbol|RCSD domain containing 1 [Source:HGNC Symbol;Acc:28310]|3|ENSBTAG00000014151|ENSBTAT00000018808	138326	106928	63948.5	65740.9
ENSBTAP00000044420	22	6	789.14	29243	0.772584	0.984529	TPM3	TPM3|UniProtKB Gene Name|Bos taurus tropomyosin 3 (TPM3), mRNA. [Source:RefSeq mRNA;Acc:NM_001011674]|3|ENSBTAG00000033217|ENSBTAT00000047197	3.74131e+06	2.89047e+06	3.63154e+06	3.57536e+06
ENSBTAP00000053644	95	95	5549.54	124357	0.772395	0.884961	VCL	VCL|UniProtKB Gene Name|Bos taurus vinculin (VCL), mRNA. [Source:RefSeq mRNA;Acc:NM_001191370]|28|ENSBTAG00000021879|ENSBTAT00000061210	1.86401e+08	1.43975e+08	1.74568e+08	1.54486e+08
ENSBTAP00000025996	8	8	280.34	59755	0.772234	0.982736	G6PD	G6PD|HGNC Symbol|glucose-6-phosphate dehydrogenase [Source:HGNC Symbol;Acc:4057]|X|ENSBTAG00000019512|ENSBTAT00000025996	944804	729610	566584	556803
ENSBTAP00000000927	13	13	446.07	51974	0.771639	0.850734	ILK	ILK|HGNC Symbol|integrin-linked kinase [Source:HGNC Symbol;Acc:6040]|15|ENSBTAG00000000696|ENSBTAT00000000927	4.86398e+06	3.75323e+06	4.67924e+06	3.98079e+06
ENSBTAP00000019916	1	1	19.45	46702	0.771362	0.735507	PRKAR2B	PRKAR2B|EntrezGene|Bos taurus protein kinase, cAMP-dependent, regulatory, type II, beta (PRKAR2B), mRNA. [Source:RefSeq mRNA;Acc:NM_174649]|4|ENSBTAG00000014958|ENSBTAT00000019916	41022.1	31642.9	33752.9	24825.5
ENSBTAP00000017416	13	9	862.05	39756	0.77085	0.74779	ALDOC	ALDOC|UniProtKB Gene Name|Bos taurus aldolase C, fructose-bisphosphate (ALDOC), mRNA. [Source:RefSeq mRNA;Acc:NM_001097984]|19|ENSBTAG00000013099|ENSBTAT00000017416	3.24185e+06	2.49898e+06	3.83852e+06	2.8704e+06
ENSBTAP00000005626;ENSBTAP00000011359	8	4	322.16	49246	0.770753	0.721857	SEPT11	SEPT11|UniProtKB Gene Name|Bos taurus septin 11 (SEPT11), mRNA. [Source:RefSeq mRNA;Acc:NM_001082447]|6|ENSBTAG00000021372|ENSBTAT00000005626	545754	420642	470443	339592
ENSBTAP00000016365	3	3	95.55	110949	0.769772	0.739972	UBA7	UBA7|UniProtKB Gene Name|Bos taurus ubiquitin-like modifier activating enzyme 7 (UBA7), mRNA. [Source:RefSeq mRNA;Acc:NM_001012284]|22|ENSBTAG00000012335|ENSBTAT00000016365	122924	94623.7	75735.7	56042.3
ENSBTAP00000001338	9	9	369.93	53990	0.769181	1.00337	HCLS1	HCLS1|UniProtKB Gene Name|Bos taurus hematopoietic cell-specific Lyn substrate 1 (HCLS1), mRNA. [Source:RefSeq mRNA;Acc:NM_001035057]|1|ENSBTAG00000001009|ENSBTAT00000001338	1.64625e+06	1.26626e+06	974977	978259
ENSBTAP00000018691	1	1	37.45	31062	0.767811	0.67165	VDAC5P	VDAC5P|UniProtKB Gene Name|Bos taurus voltage-dependent anion channel 3 (VDAC3), mRNA. [Source:RefSeq mRNA;Acc:NM_174729]|27|ENSBTAG00000014068|ENSBTAT00000018691	70856.3	54404.2	54826.8	36824.5
ENSBTAP00000027511;ENSBTAP00000003515;ENSBTAP00000002747	8	8	419.18	41021	0.766246	0.676261	GNAI2	GNAI2|UniProtKB Gene Name|Bos taurus guanine nucleotide binding protein (G protein), alpha inhibiting activity polypeptide 2 (GNAI2), mRNA. [Source:RefSeq mRNA;Acc:NM_001101040]|22|ENSBTAG00000020645|ENSBTAT00000027511	3.03419e+06	2.32493e+06	2.31303e+06	1.56421e+06
ENSBTAP00000045293	3	3	87.29	43753	0.766096	0.685519	MAP2K1	MAP2K1|UniProtKB Gene Name|Bos taurus mitogen-activated protein kinase kinase 1 (MAP2K1), mRNA. [Source:RefSeq mRNA;Acc:NM_001130752]|10|ENSBTAG00000033983|ENSBTAT00000048212	187427	143587	186067	127552
ENSBTAP00000014218	4	4	136.85	23173	0.765697	0.697563	CLTB	CLTB|UniProtKB Gene Name|Bos taurus clathrin, light chain B (CLTB), mRNA. [Source:RefSeq mRNA;Acc:NM_174277]|7|ENSBTAG00000010740|ENSBTAT00000014218	622018	476277	604418	421620
ENSBTAP00000015581;ENSBTAP00000018777;ENSBTAP00000056220	3	3	93.45	23680	0.76551	0.856402	RAB5C	RAB5C|UniProtKB Gene Name|Bos taurus RAB5C, member RAS oncogene family (RAB5C), mRNA. [Source:RefSeq mRNA;Acc:NM_001034743]|19|ENSBTAG00000006982|ENSBTAT00000015581	338038	258771	259462	222204
ENSBTAP00000022780	6	6	310.14	29752	0.764051	0.607963	STX7	STX7|UniProtKB Gene Name|Bos taurus syntaxin 7 (STX7), mRNA. [Source:RefSeq mRNA;Acc:NM_001077864]|9|ENSBTAG00000017139|ENSBTAT00000022780	1.646e+06	1.25762e+06	1.97378e+06	1.19998e+06
ENSBTAP00000017991	5	5	187	30047	0.764031	0.815678	DDAH2	DDAH2|UniProtKB Gene Name|Bos taurus dimethylarginine dimethylaminohydrolase 2 (DDAH2), mRNA. [Source:RefSeq mRNA;Acc:NM_001034704]|23|ENSBTAG00000013530|ENSBTAT00000017991	829561	633810	838891	684265
ENSBTAP00000008877	30	30	1777.54	50827	0.763275	1.2306	FGG	FGG|UniProtKB Gene Name|Bos taurus fibrinogen gamma chain (FGG), mRNA. [Source:RefSeq mRNA;Acc:NM_173911]|17|ENSBTAG00000006745|ENSBTAT00000008877	4.51829e+07	3.44869e+07	4.55503e+07	5.60542e+07
ENSBTAP00000055171	1	1	44.97	33537	0.762467	0.883675	CRKL	CRKL|HGNC Symbol|v-crk avian sarcoma virus CT10 oncogene homolog-like [Source:HGNC Symbol;Acc:2363]|17|ENSBTAG00000045548|ENSBTAT00000066024	102895	78453.9	79490.5	70243.7
ENSBTAP00000029826	30	30	1635	57146	0.762245	1.23254	FGB	FGB|UniProtKB Gene Name|Bos taurus fibrinogen beta chain (FGB), mRNA. [Source:RefSeq mRNA;Acc:NM_001142917]|17|ENSBTAG00000022120|ENSBTAT00000029830	8.38623e+07	6.39237e+07	8.11573e+07	1.00029e+08
ENSBTAP00000007680	2	2	58.25	27096	0.761823	0.663258	REXO2	REXO2|UniProtKB Gene Name|Bos taurus REX2, RNA exonuclease 2 homolog (S. cerevisiae) (REXO2), mRNA. [Source:RefSeq mRNA;Acc:NM_001081735]|15|ENSBTAG00000005843|ENSBTAT00000007680	278122	211880	306038	202982
ENSBTAP00000021544	7	6	258.3	86635	0.761505	0.648158	ENAH	ENAH|HGNC Symbol|enabled homolog (Drosophila) [Source:HGNC Symbol;Acc:18271]|16|ENSBTAG00000016185|ENSBTAT00000021544	987234	751784	1.00607e+06	652093
ENSBTAP00000025685	1	1	23.41	131096	0.761453	0.446017	ITGA2	ITGA2|EntrezGene|Bos taurus integrin, alpha 2 (CD49B, alpha 2 subunit of VLA-2 receptor) (ITGA2), mRNA. [Source:RefSeq mRNA;Acc:NM_001166499]|20|ENSBTAG00000019289|ENSBTAT00000025685	9059.26	6898.2	13629.3	6078.89
ENSBTAP00000023912	17	17	934.05	61317	0.761261	0.80257	ZYX	ZYX|UniProtKB Gene Name|Bos taurus zyxin (ZYX), mRNA. [Source:RefSeq mRNA;Acc:NM_001078101]|4|ENSBTAG00000017970|ENSBTAT00000023912	1.65899e+07	1.26292e+07	2.19581e+07	1.76229e+07
ENSBTAP00000017776	4	2	118.87	59054	0.760877	0.975024	DNM3	DNM3|HGNC Symbol|dynamin 3 [Source:HGNC Symbol;Acc:29125]|16|ENSBTAG00000014319|ENSBTAT00000017776	60936.7	46365.4	65099.7	63473.7
ENSBTAP00000019643;ENSBTAP00000005760	5	5	268.4	23164	0.760678	0.663847	CD9	CD9|UniProtKB Gene Name|Bos taurus CD9 molecule (CD9), mRNA. [Source:RefSeq mRNA;Acc:NM_173900]|5|ENSBTAG00000014764|ENSBTAT00000019643	8.58187e+06	6.52804e+06	8.31454e+06	5.51958e+06
ENSBTAP00000004913	4	4	223.95	67887	0.760411	0.856856	C8A	C8A|EntrezGene|Bos taurus complement component 8, alpha polypeptide (C8A), mRNA. [Source:RefSeq mRNA;Acc:NM_001046285]|3|ENSBTAG00000003774|ENSBTAT00000004913	438702	333594	506424	433933
ENSBTAP00000045651	1	1	52.31	27630	0.760239	0.690106	RGS18	RGS18|HGNC Symbol|regulator of G-protein signaling 18 [Source:HGNC Symbol;Acc:14261]|16|ENSBTAG00000013064|ENSBTAT00000048654	54775.4	41642.4	78023.6	53844.6
ENSBTAP00000014802	3	1	94.35	23842	0.759476	0.717045	RAB8B	RAB8B|EntrezGene|Bos taurus RAB8B, member RAS oncogene family (RAB8B), mRNA. [Source:RefSeq mRNA;Acc:NM_001076317]|10|ENSBTAG00000011146|ENSBTAT00000014802	58578.2	44488.7	47004.1	33704.1
ENSBTAP00000024301	54	30	3475.08	103486	0.757219	0.913479	ACTN1	ACTN1|UniProtKB Gene Name|Bos taurus actinin, alpha 1 (ACTN1), mRNA. [Source:RefSeq mRNA;Acc:NM_001035351]|10|ENSBTAG00000018255|ENSBTAT00000024301	3.4869e+07	2.64034e+07	3.07888e+07	2.81249e+07
ENSBTAP00000024641;ENSBTAP00000024644	13	13	545.13	35509	0.756919	0.617702	FHL1	FHL1|UniProtKB Gene Name|Bos taurus four and a half LIM domains 1 (FHL1), transcript variant 1, mRNA. [Source:RefSeq mRNA;Acc:NM_001113258]|X|ENSBTAG00000018513|ENSBTAT00000024641	8.04965e+06	6.09293e+06	1.17965e+07	7.28669e+06
ENSBTAP00000026635	1	1	18.96	34410	0.755152	1.17036	HAGH	HAGH|UniProtKB Gene Name|Bos taurus hydroxyacylglutathione hydrolase (HAGH), mRNA. [Source:RefSeq mRNA;Acc:NM_001035274]|25|ENSBTAG00000019998|ENSBTAT00000026635	14974.9	11308.3	7946.79	9300.6
ENSBTAP00000022470	1	1	34.58	150408	0.754884	1.52653	CYFIP1	CYFIP1|HGNC Symbol|cytoplasmic FMR1 interacting protein 1 [Source:HGNC Symbol;Acc:13759]|2|ENSBTAG00000016894|ENSBTAT00000022470	16193.4	12224.1	7957.8	12147.8
ENSBTAP00000024335	1	1	27.78	44819	0.754697	1.65472	ACAA1	ACAA1|UniProtKB Gene Name|Bos taurus acetyl-CoA acyltransferase 1 (ACAA1), mRNA. [Source:RefSeq mRNA;Acc:NM_001034319]|22|ENSBTAG00000018283|ENSBTAT00000024335	15933.1	12024.6	7660.94	12676.7
ENSBTAP00000016464	2	2	50.01	25247	0.753919	0.628932	RAB27A	RAB27A|UniProtKB Gene Name|Bos taurus RAB27A, member RAS oncogene family (RAB27A), mRNA. [Source:RefSeq mRNA;Acc:NM_001101270]|10|ENSBTAG00000012408|ENSBTAT00000016464	231764	174731	260464	163814
ENSBTAP00000009897	8	7	475.56	37193	0.753594	0.812804	MAPRE2	MAPRE2|UniProtKB Gene Name|Bos taurus microtubule-associated protein, RP/EB family, member 2 (MAPRE2), mRNA. [Source:RefSeq mRNA;Acc:NM_001034374]|24|ENSBTAG00000007520|ENSBTAT00000009897	3.99428e+06	3.01006e+06	5.87112e+06	4.77207e+06
ENSBTAP00000055697	1	1	35.2	24171	0.753106	0.944253	NUDT14	NUDT14|UniProtKB Gene Name|Bos taurus nudix (nucleoside diphosphate linked moiety X)-type motif 14 (NUDT14), mRNA. [Source:RefSeq mRNA;Acc:NM_001105652]|21|ENSBTAG00000048010|ENSBTAT00000063951	117900	88791	107108	101138
ENSBTAP00000010159;ENSBTAP00000008925;ENSBTAP00000012326	7	5	380.02	20741	0.752359	0.710757	ARF1	ARF1|UniProtKB Gene Name|Bos taurus ADP-ribosylation factor 1 (ARF1), mRNA. [Source:RefSeq mRNA;Acc:NM_176653]|7|ENSBTAG00000007725|ENSBTAT00000010159	1.61454e+06	1.21471e+06	1.58709e+06	1.12804e+06
ENSBTAP00000046293	1	1	31.5	45085	0.751084	0.622579	LAMP2	LAMP2|UniProtKB Gene Name|Bos taurus lysosomal-associated membrane protein 2 (LAMP2), transcript variant 1, mRNA. [Source:RefSeq mRNA;Acc:NM_001113244]|X|ENSBTAG00000007399|ENSBTAT00000049397	53857.2	40451.3	63909.1	39788.4
ENSBTAP00000001674;ENSBTAP00000051417	22	22	989.38	93921	0.74835	0.599341	PLG	PLG|UniProtKB Gene Name|Bos taurus plasminogen (PLG), mRNA. [Source:RefSeq mRNA;Acc:NM_173951]|9|ENSBTAG00000001271|ENSBTAT00000001674	6.09174e+06	4.55876e+06	6.43478e+06	3.85662e+06
ENSBTAP00000010387	1	1	60.95	31590	0.74764	0.428019	CYBRD1	CYBRD1|HGNC Symbol|cytochrome b reductase 1 [Source:HGNC Symbol;Acc:20797]|2|ENSBTAG00000007898|ENSBTAT00000010387	90063.1	67334.7	74070.6	31703.6
ENSBTAP00000031285	3	3	158.56	48335	0.745609	0.604262	SPOCK2	SPOCK2|UniProtKB Gene Name|Bos taurus sparc/osteonectin, cwcv and kazal-like domains proteoglycan (testican) 2 (SPOCK2), mRNA. [Source:RefSeq mRNA;Acc:NM_001101115]|28|ENSBTAG00000008827|ENSBTAT00000031330	326974	243794	268409	162189
ENSBTAP00000016620	3	3	113.38	148836	0.745513	2.49707	XDH	XDH|EntrezGene|Bos taurus xanthine dehydrogenase (XDH), mRNA. [Source:RefSeq mRNA;Acc:NM_173972]|11|ENSBTAG00000012519|ENSBTAT00000016620	192396	143434	20815.4	51977.6
ENSBTAP00000024227	2	2	106.6	59522	0.74413	0.980622	DAK	DAK|UniProtKB Gene Name|Bos taurus dihydroxyacetone kinase 2 homolog (S. cerevisiae) (DAK), mRNA. [Source:RefSeq mRNA;Acc:NM_001024524]|29|ENSBTAG00000018201|ENSBTAT00000024227	188029	139918	124426	122014
ENSBTAP00000008523	1	1	94.38	17144	0.739792	3.02137	S100A9	S100A9|HGNC Symbol|S100 calcium binding protein A9 [Source:HGNC Symbol;Acc:10499]|3|ENSBTAG00000006505|ENSBTAT00000008523	187997	139079	14386.7	43467.7
ENSBTAP00000041997;ENSBTAP00000002174;ENSBTAP00000006201	22	19	942.73	60950	0.7394	0.847982	MGC139254	MGC139254|UniProtKB Gene Name|Bos taurus EH-domain containing 3 (EHD3), mRNA. [Source:RefSeq mRNA;Acc:NM_001098004]|11|ENSBTAG00000001662|ENSBTAT00000044505	7.78886e+06	5.75909e+06	7.48761e+06	6.34936e+06
ENSBTAP00000021156	11	11	541.87	91343	0.73936	0.590524	ITGB1	ITGB1|UniProtKB Gene Name|Bos taurus integrin, beta 1 (fibronectin receptor, beta polypeptide, antigen CD29 includes MDF2, MSK12) (ITGB1), mRNA. [Source:RefSeq mRNA;Acc:NM_174368]|13|ENSBTAG00000015910|ENSBTAT00000021156	1.71627e+06	1.26894e+06	1.57418e+06	929591
ENSBTAP00000009060	1	1	25.23	28620	0.738542	0.936805	NIPSNAP3A	NIPSNAP3A|HGNC Symbol|nipsnap homolog 3A (C. elegans) [Source:HGNC Symbol;Acc:23619]|8|ENSBTAG00000006901|ENSBTAT00000009060	67775.1	50054.8	52562.4	49240.7
ENSBTAP00000003239	4	4	169.86	92491	0.738042	0.896339	VPS35	VPS35|UniProtKB Gene Name|Bos taurus vacuolar protein sorting 35 homolog (S. cerevisiae) (VPS35), mRNA. [Source:RefSeq mRNA;Acc:NM_001046258]|18|ENSBTAG00000002493|ENSBTAT00000003239	201818	148950	81445.6	73002.9
ENSBTAP00000052656	2	2	83.61	47210	0.737995	0.812854	PAFAH1B1	PAFAH1B1|UniProtKB Gene Name|Bos taurus platelet-activating factor acetylhydrolase 1b, regulatory subunit 1 (45kDa) (PAFAH1B1), mRNA. [Source:RefSeq mRNA;Acc:NM_174663]|19|ENSBTAG00000016806|ENSBTAT00000055329	247781	182861	243861	198223
ENSBTAP00000039644	1	1	51.3	35331	0.737348	0.578501	ART5	||Bos taurus ADP-ribosyltransferase 5 (ART5), mRNA. [Source:RefSeq mRNA;Acc:NM_001076515]|15|ENSBTAG00000023648|ENSBTAT00000039858	253429	186865	131827	76261.9
ENSBTAP00000015828	7	7	252.19	529079	0.737253	1.44349	PLEC	PLEC|HGNC Symbol|plectin [Source:HGNC Symbol;Acc:9069]|14|ENSBTAG00000011922|ENSBTAT00000015828	381769	281461	117218	169203
ENSBTAP00000004921	1	1	31.46	73004	0.736541	0.972577	MPL	MPL|EntrezGene|Bos taurus myeloproliferative leukemia virus oncogene (MPL), mRNA. [Source:RefSeq mRNA;Acc:NM_001192663]|3|ENSBTAG00000003781|ENSBTAT00000004921	8754.15	6447.79	5433.44	5284.44
ENSBTAP00000010330	7	5	232.49	101634	0.736505	0.752542	ITIH4	ITIH4|HGNC Symbol|inter-alpha-trypsin inhibitor heavy chain family, member 4 [Source:HGNC Symbol;Acc:6169]|22|ENSBTAG00000007850|ENSBTAT00000010330	356065	262244	428313	322324
ENSBTAP00000049070	1	1	21.24	15527	0.733166	1.44497	LYPLA2	LYPLA2|EntrezGene|Bos taurus lysophospholipase II (LYPLA2), mRNA. [Source:RefSeq mRNA;Acc:NM_001080362]|2|ENSBTAG00000011625|ENSBTAT00000056452	71611.2	52502.9	31825.4	45986.7
ENSBTAP00000015889	6	6	163.69	27493	0.731298	1.1427	SERPINB1	SERPINB1|EntrezGene|Bos taurus serpin peptidase inhibitor, clade B (ovalbumin), member 1 (SERPINB1), mRNA. [Source:RefSeq mRNA;Acc:NM_001206610]|23|ENSBTAG00000011975|ENSBTAT00000015889	3.04583e+06	2.22741e+06	2.17494e+06	2.48529e+06
ENSBTAP00000015297	2	2	46.71	57366	0.730915	1.37682	IFI16	||Uncharacterized protein [Source:UniProtKB/TrEMBL;Acc:E1BNK6]|3|ENSBTAG00000011511|ENSBTAT00000015297	226393	165474	138601	190829
ENSBTAP00000054980	1	1	16.06	22319	0.730142	1.13506	MYADM	||Uncharacterized protein [Source:UniProtKB/TrEMBL;Acc:G3MZI3]|8|ENSBTAG00000047413|ENSBTAT00000066068	741209	541188	2.23821e+06	2.54049e+06
ENSBTAP00000046587	1	1	16.99	51463	0.728976	1.78173	MGAT4B	MGAT4B|EntrezGene|Bos taurus mannosyl (alpha-1,3-)-glycoprotein beta-1,4-N-acetylglucosaminyltransferase, isozyme B (MGAT4B), mRNA. [Source:RefSeq mRNA;Acc:NM_001103261]|7|ENSBTAG00000009738|ENSBTAT00000049734	948328	691309	2.29561e+06	4.09017e+06
ENSBTAP00000009559	32	31	2150.44	83193	0.727967	0.921791	F13A1	F13A1|UniProtKB Gene Name|Bos taurus coagulation factor XIII, A1 polypeptide (F13A1), mRNA. [Source:RefSeq mRNA;Acc:NM_001167894]|23|ENSBTAG00000007268|ENSBTAT00000009559	6.62096e+07	4.81984e+07	5.6509e+07	5.20895e+07
ENSBTAP00000002658	2	2	76.5	84269	0.727097	0.764268	PLOD1	PLOD1|HGNC Symbol|procollagen-lysine, 2-oxoglutarate 5-dioxygenase 1 [Source:HGNC Symbol;Acc:9081]|16|ENSBTAG00000002052|ENSBTAT00000002658	149395	108625	142564	108957
ENSBTAP00000021305;ENSBTAP00000026009	2	2	86.98	59319	0.726882	0.856966	PPP3CA	PPP3CA|UniProtKB Gene Name|Bos taurus protein phosphatase 3, catalytic subunit, alpha isozyme (PPP3CA), mRNA. [Source:RefSeq mRNA;Acc:NM_174787]|6|ENSBTAG00000016005|ENSBTAT00000021305	138883	100952	144565	123887
ENSBTAP00000014966	5	5	185.71	27066	0.726817	1.37831	EIF6	EIF6|UniProtKB Gene Name|Bos taurus eukaryotic translation initiation factor 6 (EIF6), mRNA. [Source:RefSeq mRNA;Acc:NM_174830]|13|ENSBTAG00000011263|ENSBTAT00000014966	2.88519e+06	2.09701e+06	1.18487e+06	1.63312e+06
ENSBTAP00000007016	4	4	189.34	63339	0.726162	0.69694	MAGED2	MAGED2|UniProtKB Gene Name|Bos taurus melanoma antigen family D, 2 (MAGED2), mRNA. [Source:RefSeq mRNA;Acc:NM_001075665]|X|ENSBTAG00000039888|ENSBTAT00000007016	177095	128600	190945	133077
ENSBTAP00000054310	1	1	29.02	156878	0.725714	1.29708	HECW2	HECW2|HGNC Symbol|HECT, C2 and WW domain containing E3 ubiquitin protein ligase 2 [Source:HGNC Symbol;Acc:29853]|2|ENSBTAG00000020696|ENSBTAT00000063835	207844	150836	141944	184112
ENSBTAP00000000027;ENSBTAP00000001199	3	2	126.4	23618	0.725516	0.867562	RAB6C	RAB6C|HGNC Symbol|RAB6C, member RAS oncogene family [Source:HGNC Symbol;Acc:16525]|15|ENSBTAG00000000025|ENSBTAT00000000027	135341	98192.2	153258	132961
ENSBTAP00000042184	2	2	57.49	25665	0.725387	0.855862	LXN	LXN|EntrezGene|Bos taurus latexin (LXN), mRNA. [Source:RefSeq mRNA;Acc:NM_001080340]|1|ENSBTAG00000009336|ENSBTAT00000044711	219301	159078	102174	87446.8
ENSBTAP00000002600;ENSBTAP00000042078	105	104	7026.93	133300	0.724942	0.707475	THBS1	THBS1|EntrezGene|Bos taurus thrombospondin 1 (THBS1), mRNA. [Source:RefSeq mRNA;Acc:NM_174196]|10|ENSBTAG00000002006|ENSBTAT00000002600	1.21244e+09	8.78952e+08	1.1006e+09	7.78647e+08
ENSBTAP00000022642	8	7	386.65	108360	0.724235	0.592061	USO1	USO1|UniProtKB Gene Name|Bos taurus USO1 vesicle docking protein homolog (yeast) (USO1), mRNA. [Source:RefSeq mRNA;Acc:NM_174845]|6|ENSBTAG00000017028|ENSBTAT00000022642	639968	463487	817467	483991
ENSBTAP00000001576	14	9	686.08	104939	0.723384	0.875151	AP1B1	AP1B1|HGNC Symbol|adaptor-related protein complex 1, beta 1 subunit [Source:HGNC Symbol;Acc:554]|17|ENSBTAG00000001189|ENSBTAT00000001576	1.07854e+06	780202	1.03781e+06	908237
ENSBTAP00000015883;ENSBTAP00000041898	4	4	156.67	22621	0.721678	1.36364	HSPB1	HSPB1|UniProtKB Gene Name|Bos taurus heat shock 27kDa protein 1 (HSPB1), mRNA. [Source:RefSeq mRNA;Acc:NM_001025569]|25|ENSBTAG00000011969|ENSBTAT00000015883	1.98158e+06	1.43006e+06	694784	947433
ENSBTAP00000022949	1	1	20.49	16896	0.721668	0.94625	COX5A	COX5A|UniProtKB Gene Name|Bos taurus cytochrome c oxidase subunit Va (COX5A), mRNA. [Source:RefSeq mRNA;Acc:NM_001002891]|21|ENSBTAG00000017267|ENSBTAT00000022949	71700.3	51743.8	48617.9	46004.6
ENSBTAP00000014479;ENSBTAP00000015345	27	26	1161.6	99989	0.721247	0.759423	PDE5A	PDE5A|UniProtKB Gene Name|Bos taurus phosphodiesterase 5A, cGMP-specific (PDE5A), mRNA. [Source:RefSeq mRNA;Acc:NM_174417]|6|ENSBTAG00000024888|ENSBTAT00000014479	5.55418e+06	4.00594e+06	5.84378e+06	4.4379e+06
ENSBTAP00000029960	1	1	31.63	54846	0.719131	0.913611	CORO1B	CORO1B|UniProtKB Gene Name|Bos taurus coronin, actin binding protein, 1B (CORO1B), mRNA. [Source:RefSeq mRNA;Acc:NM_001113243]|29|ENSBTAG00000004783|ENSBTAT00000029972	1.04109e+06	748681	491337	448891
ENSBTAP00000008054	1	1	13.89	70040	0.717711	0.902989	MAU2	MAU2|HGNC Symbol|MAU2 sister chromatid cohesion factor [Source:HGNC Symbol;Acc:29140]|7|ENSBTAG00000006124|ENSBTAT00000008054	216343	155272	487253	439984
ENSBTAP00000012208	1	1	39.21	38313	0.717588	0.748214	CD226	CD226|HGNC Symbol|CD226 molecule [Source:HGNC Symbol;Acc:16961]|24|ENSBTAG00000009266|ENSBTAT00000012208	148023	106220	127041	95054.3
ENSBTAP00000056404	4	4	162.01	21519	0.716162	1.38112	CBX1	CBX1|HGNC Symbol|chromobox homolog 1 [Source:HGNC Symbol;Acc:1551]|19|ENSBTAG00000002949|ENSBTAT00000003835	388494	278225	197872	273285
ENSBTAP00000027348	7	6	329.68	47072	0.715967	0.946387	IDH1	IDH1|UniProtKB Gene Name|Bos taurus isocitrate dehydrogenase 1 (NADP+), soluble (IDH1), mRNA. [Source:RefSeq mRNA;Acc:NM_181012]|2|ENSBTAG00000020527|ENSBTAT00000027348	708603	507336	653752	618703
ENSBTAP00000007150	3	3	90.74	39137	0.71557	0.692139	CAPG	CAPG|UniProtKB Gene Name|Bos taurus capping protein (actin filament), gelsolin-like (CAPG), mRNA. [Source:RefSeq mRNA;Acc:NM_178574]|11|ENSBTAG00000005432|ENSBTAT00000007150	210521	150643	88316.2	61127.1
ENSBTAP00000035986	3	1	61.04	92512	0.715103	1.10304	DNM2	DNM2|EntrezGene|Bos taurus dynamin 2 (DNM2), mRNA. [Source:RefSeq mRNA;Acc:NM_001099369]|7|ENSBTAG00000013362|ENSBTAT00000036123	45313	32403.5	41092	45326.3
ENSBTAP00000029282	1	1	71.89	49626	0.714569	1.77349	SLAIN2	SLAIN2|UniProtKB Gene Name|Bos taurus SLAIN motif family, member 2 (SLAIN2), mRNA. [Source:RefSeq mRNA;Acc:NM_001035405]|6|ENSBTAG00000021963|ENSBTAT00000029282	65086.7	46508.9	52652.7	93378.9
ENSBTAP00000017097	3	3	107.68	42844	0.714148	1.03576	DEK	DEK|UniProtKB Gene Name|Bos taurus DEK oncogene (DEK), mRNA. [Source:RefSeq mRNA;Acc:NM_001099717]|23|ENSBTAG00000012865|ENSBTAT00000017097	271345	193781	152142	157582
ENSBTAP00000051735;ENSBTAP00000026534	23	23	1563.02	80938	0.711758	0.727898	GSN	GSN|HGNC Symbol|gelsolin [Source:HGNC Symbol;Acc:4620]|8|ENSBTAG00000019915|ENSBTAT00000053931	2.41561e+07	1.71933e+07	2.97025e+07	2.16204e+07
ENSBTAP00000049804	2	2	171.91	27221	0.709869	0.856957	NUCKS1	NUCKS1|UniProtKB Gene Name|Bos taurus nuclear casein kinase and cyclin-dependent kinase substrate 1 (NUCKS1), mRNA. [Source:RefSeq mRNA;Acc:NM_001045920]|16|ENSBTAG00000008001|ENSBTAT00000057198	487175	345831	226771	194332
ENSBTAP00000002261	4	4	151.81	37446	0.70936	0.853586	GYG1	GYG1|UniProtKB Gene Name|Bos taurus glycogenin 1 (GYG1), mRNA. [Source:RefSeq mRNA;Acc:NM_001045867]|1|ENSBTAG00000001721|ENSBTAT00000002261	653826	463798	734148	626658
ENSBTAP00000021369	3	3	280.24	21454	0.708697	1.01449	CSRP1	CSRP1|UniProtKB Gene Name|Bos taurus cysteine and glycine-rich protein 1 (CSRP1), mRNA. [Source:RefSeq mRNA;Acc:NM_001083771]|16|ENSBTAG00000016057|ENSBTAT00000021369	812046	575495	480814	487783
ENSBTAP00000016160	1	1	22.79	42400	0.707216	0.532521	GNAQ	GNAQ|UniProtKB Gene Name|Bos taurus guanine nucleotide binding protein (G protein), q polypeptide (GNAQ), mRNA. [Source:RefSeq mRNA;Acc:NM_001110002]|8|ENSBTAG00000009789|ENSBTAT00000016160	44372.3	31380.8	51321.7	27329.9
ENSBTAP00000051209	1	1	40.94	69285	0.70536	1.58666	RPN2	RPN2|UniProtKB Gene Name|Bos taurus ribophorin II (RPN2), mRNA. [Source:RefSeq mRNA;Acc:NM_001034604]|13|ENSBTAG00000014648|ENSBTAT00000057162	35952.4	25359.4	16604.3	26345.3
ENSBTAP00000032384	4	4	243.83	15844	0.703155	0.845184	SOD1	SOD1|UniProtKB Gene Name|Bos taurus superoxide dismutase 1, soluble (SOD1), mRNA. [Source:RefSeq mRNA;Acc:NM_174615]|1|ENSBTAG00000018854|ENSBTAT00000032452	3.19868e+06	2.24917e+06	2.60005e+06	2.19753e+06
ENSBTAP00000024695	1	1	54.08	23125	0.702828	0.768401	MGC137211	MGC137211|EntrezGene|Bos taurus protein HP-25 homolog 2 (MGC137211), mRNA. [Source:RefSeq mRNA;Acc:NM_001046079]|5|ENSBTAG00000018556|ENSBTAT00000024695	153764	108070	137776	105867
ENSBTAP00000031493	1	1	113.21	26603	0.70218	0.528077	IGKC	Immunoglobulin kappa constant||Uncharacterized protein [Source:UniProtKB/TrEMBL;Acc:F1MH40]|11|ENSBTAG00000003408|ENSBTAT00000031540	188408	132296	249147	131569
ENSBTAP00000000465	1	1	26.92	28990	0.701301	1.0366	EIF3J	EIF3J|UniProtKB Gene Name|Bos taurus eukaryotic translation initiation factor 3, subunit J (EIF3J), mRNA. [Source:RefSeq mRNA;Acc:NM_001076143]|10|ENSBTAG00000000359|ENSBTAT00000000465	76520.8	53664.1	56948.4	59032.6
ENSBTAP00000021909	6	5	221.31	37177	0.700309	0.838676	CALU	CALU|HGNC Symbol|calumenin [Source:HGNC Symbol;Acc:1458]|4|ENSBTAG00000016481|ENSBTAT00000021909	382364	267773	422391	354249
ENSBTAP00000009138	3	2	84.5	59627	0.699995	1.16286	CPNE1	CPNE1|UniProtKB Gene Name|Bos taurus copine I (CPNE1), mRNA. [Source:RefSeq mRNA;Acc:NM_001076940]|13|ENSBTAG00000006955|ENSBTAT00000009138	49370.8	34559.4	32329.3	37594.2
ENSBTAP00000003955	3	3	118.6	30591	0.699234	1.17298	PSMB8	PSMB8|UniProtKB Gene Name|Bos taurus proteasome (prosome, macropain) subunit, beta type, 8 (large multifunctional peptidase 7) (PSMB8), mRNA. [Source:RefSeq mRNA;Acc:NM_001040480]|23|ENSBTAG00000003039|ENSBTAT00000003955	604646	422789	252779	296505
ENSBTAP00000027046	5	5	204.77	67803	0.698538	1.00761	PTPN6	PTPN6|UniProtKB Gene Name|Bos taurus protein tyrosine phosphatase, non-receptor type 6 (PTPN6), mRNA. [Source:RefSeq mRNA;Acc:NM_001098017]|5|ENSBTAG00000020294|ENSBTAT00000027046	274965	192073	207750	209332
ENSBTAP00000029340;ENSBTAP00000031480	5	4	284.45	99780	0.693768	0.728316	CFH	CFH|EntrezGene|Bos taurus complement factor H (CFH), mRNA. [Source:RefSeq mRNA;Acc:NM_001033936]|16|ENSBTAG00000039995|ENSBTAT00000029340	146129	101380	1.31037e+06	954361
ENSBTAP00000018566	25	24	1262.25	62096	0.692056	0.772524	CALD1	CALD1|HGNC Symbol|caldesmon 1 [Source:HGNC Symbol;Acc:1441]|4|ENSBTAG00000013953|ENSBTAT00000018566	1.59164e+07	1.10151e+07	1.81103e+07	1.39906e+07
ENSBTAP00000022710	1	1	81.06	37836	0.691766	0.562853	CTSL2	CTSL2|UniProtKB Gene Name|Bos taurus cathepsin L2 (CTSL2), mRNA. [Source:RefSeq mRNA;Acc:NM_174032]|8|ENSBTAG00000017077|ENSBTAT00000022710	47784.6	33055.8	86395.3	48627.9
ENSBTAP00000007324	8	6	361.11	51651	0.69124	0.720055	CLU	CLU|UniProtKB Gene Name|Bos taurus clusterin (CLU), mRNA. [Source:RefSeq mRNA;Acc:NM_173902]|8|ENSBTAG00000005574|ENSBTAT00000007324	1.75011e+06	1.20974e+06	1.30551e+06	940035
ENSBTAP00000011447;ENSBTAP00000003234	12	9	544.09	36916	0.689341	0.947605	LDHA	LDHA|UniProtKB Gene Name|Bos taurus lactate dehydrogenase A (LDHA), mRNA. [Source:RefSeq mRNA;Acc:NM_174099]|29|ENSBTAG00000008683|ENSBTAT00000011447	8.33022e+06	5.74236e+06	3.87765e+06	3.67448e+06
ENSBTAP00000053760;ENSBTAP00000019454	3	3	95.48	115292	0.68807	0.789642	PPP1R12A	PPP1R12A|HGNC Symbol|protein phosphatase 1, regulatory subunit 12A [Source:HGNC Symbol;Acc:7618]|5|ENSBTAG00000014609|ENSBTAT00000061600	252534	173761	233132	184091
ENSBTAP00000016890	1	1	34.85	46370	0.687642	0.513302	SERPINI1	SERPINI1|EntrezGene|Bos taurus serpin peptidase inhibitor, clade I (neuroserpin), member 1 (SERPINI1), mRNA. [Source:RefSeq mRNA;Acc:NM_001192238]|1|ENSBTAG00000012708|ENSBTAT00000016890	32745.9	22517.4	55211.7	28340.2
ENSBTAP00000017571	6	6	199.45	64668	0.686744	0.832213	GP5	GP5|HGNC Symbol|glycoprotein V (platelet) [Source:HGNC Symbol;Acc:4443]|1|ENSBTAG00000013203|ENSBTAT00000017571	1.14798e+06	788367	1.19967e+06	998378
ENSBTAP00000016526	2	2	42.59	49965	0.685455	0.599147	AP2M1	AP2M1|UniProtKB Gene Name|Bos taurus adaptor-related protein complex 2, mu 1 subunit (AP2M1), mRNA. [Source:RefSeq mRNA;Acc:NM_001034523]|1|ENSBTAG00000020106|ENSBTAT00000016526	130288	89306.7	128994	77286.6
ENSBTAP00000002055;ENSBTAP00000049731	8	8	459.21	16955	0.684765	0.880217	CALM1	||Uncharacterized protein [Source:UniProtKB/TrEMBL;Acc:F1N6C0]|11|ENSBTAG00000001575|ENSBTAT00000002055	1.05767e+07	7.24255e+06	7.58592e+06	6.67725e+06
ENSBTAP00000025884	1	1	80.79	29721	0.683533	0.954495	ICAM2	ICAM2|HGNC Symbol|intercellular adhesion molecule 2 [Source:HGNC Symbol;Acc:5345]|19|ENSBTAG00000019432|ENSBTAT00000025884	65228.3	44585.7	60461.9	57710.6
ENSBTAP00000018580	4	4	270.66	26559	0.681625	0.64984	ECSOD	ECSOD|UniProtKB Gene Name|Bos taurus superoxide dismutase 3, extracellular (SOD3), mRNA. [Source:RefSeq mRNA;Acc:NM_001082610]|6|ENSBTAG00000013980|ENSBTAT00000018580	403347	274931	1.80984e+06	1.1761e+06
ENSBTAP00000040769	3	3	97.97	107925	0.680956	0.775491	AP2A1	AP2A1|UniProtKB Gene Name|Uncharacterized protein [Source:UniProtKB/TrEMBL;Acc:E1BMW2]|18|ENSBTAG00000019180|ENSBTAT00000043179	93858.7	63913.7	98413.1	76318.4
ENSBTAP00000024666	1	1	40.36	18359	0.680074	0.732046	IGJ	IGJ|UniProtKB Gene Name|Bos taurus immunoglobulin J polypeptide, linker protein for immunoglobulin alpha and mu polypeptides (IGJ), mRNA. [Source:RefSeq mRNA;Acc:NM_175773]|6|ENSBTAG00000018531|ENSBTAT00000024666	240397	163488	169193	123857
ENSBTAP00000015769	2	2	39.02	114579	0.679388	0.884439	NNT	NNT|UniProtKB Gene Name|Bos taurus nicotinamide nucleotide transhydrogenase (NNT), mRNA. [Source:RefSeq mRNA;Acc:NM_173943]|20|ENSBTAG00000011885|ENSBTAT00000015769	155624	105729	154179	136362
ENSBTAP00000027649	9	9	444.84	46673	0.677311	0.75612	ASS1	ASS1|UniProtKB Gene Name|Bos taurus argininosuccinate synthase 1 (ASS1), mRNA. [Source:RefSeq mRNA;Acc:NM_173892]|11|ENSBTAG00000020747|ENSBTAT00000027649	2.17091e+06	1.47038e+06	1.99988e+06	1.51215e+06
ENSBTAP00000022687	2	2	97.13	87538	0.6773	0.902914	ITGB2	ITGB2|UniProtKB Gene Name|Bos taurus integrin, beta 2 (complement component 3 receptor 3 and 4 subunit) (ITGB2), mRNA. [Source:RefSeq mRNA;Acc:NM_175781]|1|ENSBTAG00000017060|ENSBTAT00000022687	136433	92406.2	48246.7	43562.6
ENSBTAP00000007403	1	1	34.47	27360	0.675007	0.771206	GSTT1	GSTT1|UniProtKB Gene Name|Bos taurus glutathione S-transferase theta 1 (GSTT1), mRNA. [Source:RefSeq mRNA;Acc:NM_001046232]|17|ENSBTAG00000040298|ENSBTAT00000007403	22113.7	14926.9	98141.9	75687.6
ENSBTAP00000022422	1	1	28.74	22509	0.673911	0.674108	SAR1A	SAR1A|UniProtKB Gene Name|Bos taurus SAR1 homolog A (S. cerevisiae) (SAR1A), mRNA. [Source:RefSeq mRNA;Acc:NM_001034521]|28|ENSBTAG00000016858|ENSBTAT00000022422	43285.6	29170.7	39366.4	26537.2
ENSBTAP00000037834	1	1	32.88	20918	0.673763	0.657242	MGC137014	MGC137014|EntrezGene|Bos taurus protein HP-20 homolog (MGC137014), mRNA. [Source:RefSeq mRNA;Acc:NM_001046584]|5|ENSBTAG00000026666|ENSBTAT00000038015	87807.8	59161.7	61708.9	40557.7
ENSBTAP00000052345	10	10	486.28	100944	0.67286	0.755172	EPS15	EPS15|UniProtKB Gene Name|Bos taurus epidermal growth factor receptor pathway substrate 15 (EPS15), mRNA. [Source:RefSeq mRNA;Acc:NM_001098087]|3|ENSBTAG00000005542|ENSBTAT00000053382	780542	525195	854307	645149
ENSBTAP00000026816;ENSBTAP00000023242;ENSBTAP00000029974	9	9	442.13	42748	0.671316	0.956422	Serpin B6	||Serpin B6 [Source:UniProtKB/TrEMBL;Acc:F1N2A2]|23|ENSBTAG00000025280|ENSBTAT00000026816	1.77325e+06	1.19041e+06	1.26798e+06	1.21273e+06
ENSBTAP00000041125	3	3	113.24	15078	0.670596	0.538992	TFF2	TFF2|UniProtKB Gene Name|Bos taurus trefoil factor 2 (TFF2), mRNA. [Source:RefSeq mRNA;Acc:NM_001083521]|1|ENSBTAG00000030814|ENSBTAT00000043564	221006	148206	103993	56051.1
ENSBTAP00000000731	1	1	29.69	98740	0.670207	1.37183	ACO1	ACO1|HGNC Symbol|aconitase 1, soluble [Source:HGNC Symbol;Acc:117]|8|ENSBTAG00000000555|ENSBTAT00000000731	28855.9	19339.4	7662.33	10511.4
ENSBTAP00000028559	1	1	63.89	51228	0.669096	1.06549	CSK	CSK|UniProtKB Gene Name|Bos taurus c-src tyrosine kinase (CSK), mRNA. [Source:RefSeq mRNA;Acc:NM_001075397]|21|ENSBTAG00000021424|ENSBTAT00000028559	54585.5	36522.9	35999.6	38357.1
ENSBTAP00000024203	4	4	125.23	35023	0.668389	0.922947	PDXK	PDXK|UniProtKB Gene Name|Bos taurus pyridoxal (pyridoxine, vitamin B6) kinase (PDXK), mRNA. [Source:RefSeq mRNA;Acc:NM_001075651]|1|ENSBTAG00000018186|ENSBTAT00000024203	615705	411531	225998	208584
ENSBTAP00000014953	1	1	29	50163	0.664818	0.908193	ACOT9	ACOT9|UniProtKB Gene Name|Bos taurus acyl-CoA thioesterase 9 (ACOT9), mRNA. [Source:RefSeq mRNA;Acc:NM_001034560]|X|ENSBTAG00000011258|ENSBTAT00000014953	28619.9	19027	37133.3	33724.2
ENSBTAP00000000086	2	2	133.15	17313	0.662807	0.689729	GLIPR2	GLIPR2|UniProtKB Gene Name|Bos taurus GLI pathogenesis-related 2 (GLIPR2), mRNA. [Source:RefSeq mRNA;Acc:NM_001076112]|8|ENSBTAG00000000078|ENSBTAT00000000086	144328	95661.8	167983	115863
ENSBTAP00000020020	1	1	70.72	83880	0.661288	1.23453	HADHA	HADHA|UniProtKB Gene Name|Bos taurus hydroxyacyl-CoA dehydrogenase/3-ketoacyl-CoA thiolase/enoyl-CoA hydratase (trifunctional protein), alpha subunit (HADHA), mRNA. [Source:RefSeq mRNA;Acc:NM_174335]|11|ENSBTAG00000015038|ENSBTAT00000020020	48695.9	32202	40267.2	49711
ENSBTAP00000044864	3	3	97.38	122366	0.661221	0.479261	MMRN1	MMRN1|UniProtKB Gene Name|Bos taurus multimerin 1 (MMRN1), mRNA. [Source:RefSeq mRNA;Acc:NM_001102500]|6|ENSBTAG00000010285|ENSBTAT00000047683	270471	178841	197997	94892
ENSBTAP00000019348	1	1	24.89	95197	0.65801	0.881488	CASS4	CASS4|HGNC Symbol|Cas scaffolding protein family member 4 [Source:HGNC Symbol;Acc:15878]|13|ENSBTAG00000014555|ENSBTAT00000019348	28759.1	18923.8	34684	30573.5
ENSBTAP00000007711;ENSBTAP00000052078	2	2	62.99	21330	0.656884	0.832973	HEBP1	HEBP1|UniProtKB Gene Name|Bos taurus heme binding protein 1 (HEBP1), mRNA. [Source:RefSeq mRNA;Acc:NM_001075985]|5|ENSBTAG00000005868|ENSBTAT00000007711	351048	230598	170475	142001
ENSBTAP00000011403	5	5	170.31	23523	0.656574	1.18778	PRDX5	PRDX5|UniProtKB Gene Name|Bos taurus peroxiredoxin 5 (PRDX5), mRNA. [Source:RefSeq mRNA;Acc:NM_174749]|29|ENSBTAG00000008648|ENSBTAT00000011403	1.29e+06	846980	413505	491152
ENSBTAP00000022763;ENSBTAP00000022772	50	48	2665.56	71274	0.656518	0.863164	ALB	ALB|UniProtKB Gene Name|Bos taurus albumin (ALB), mRNA. [Source:RefSeq mRNA;Acc:NM_180992]|6|ENSBTAG00000017121|ENSBTAT00000022763	1.65788e+08	1.08843e+08	1.17376e+08	1.01315e+08
ENSBTAP00000002124	3	1	96.89	21338	0.655812	1.57593	HIST1H1E	HIST1H1E|UniProtKB Gene Name|HIST1H1E protein; Uncharacterized protein [Source:UniProtKB/TrEMBL;Acc:A5PK20]|23|ENSBTAG00000031774|ENSBTAT00000002124	61260.9	40175.6	28708.3	45242.3
ENSBTAP00000006806	2	2	270.72	10568	0.655784	0.782178	S100A1	S100A1|UniProtKB Gene Name|Bos taurus S100 calcium binding protein A1 (S100A1), mRNA. [Source:RefSeq mRNA;Acc:NM_001099042]|3|ENSBTAG00000005163|ENSBTAT00000006806	5.13738e+06	3.36901e+06	4.85164e+06	3.79485e+06
ENSBTAP00000020163	4	4	190.83	77399	0.654984	0.724069	F13B	F13B|UniProtKB Gene Name|Bos taurus coagulation factor XIII, B polypeptide (F13B), mRNA. [Source:RefSeq mRNA;Acc:NM_001038529]|16|ENSBTAG00000000070|ENSBTAT00000020163	471883	309076	538057	389590
ENSBTAP00000014476	1	1	90.31	25112	0.651567	0.85543	TIMP2	TIMP2|EntrezGene|Bos taurus TIMP metallopeptidase inhibitor 2 (TIMP2), mRNA. [Source:RefSeq mRNA;Acc:NM_174472]|19|ENSBTAG00000010899|ENSBTAT00000014476	200043	130342	178380	152592
ENSBTAP00000011388	2	2	48.53	34333	0.651069	1.98696	SULT1A1	SULT1A1|UniProtKB Gene Name|Bos taurus sulfotransferase family, cytosolic, 1A, phenol-preferring, member 1 (SULT1A1), mRNA. [Source:RefSeq mRNA;Acc:NM_177521]|25|ENSBTAG00000008635|ENSBTAT00000011388	306715	199693	26586.3	52826
ENSBTAP00000005713	1	1	24.48	52920	0.650168	0.68436	SERPINC1	SERPINC1|EntrezGene|Bos taurus serpin peptidase inhibitor, clade C (antithrombin), member 1 (SERPINC1), mRNA. [Source:RefSeq mRNA;Acc:NM_001034698]|16|ENSBTAG00000004362|ENSBTAT00000005713	61961	40285.1	58354.7	39935.6
ENSBTAP00000054606	1	1	97.26	23781	0.650012	0.344373	CD81	CD81|UniProtKB Gene Name|Bos taurus CD81 molecule (CD81), mRNA. [Source:RefSeq mRNA;Acc:NM_001035099]|29|ENSBTAG00000047495|ENSBTAT00000065583	170420	110775	118486	40803.5
ENSBTAP00000011576	2	2	37.16	47214	0.648061	0.861631	SERPINA3-7	||Bos taurus endopin 2 (SERPINA3-7), mRNA. [Source:RefSeq mRNA;Acc:NM_001012283]|21|ENSBTAG00000026917|ENSBTAT00000011576	112347	72807.7	118683	102261
ENSBTAP00000003599	5	5	170.65	92194	0.64524	0.879057	AP1G1	AP1G1|HGNC Symbol|adaptor-related protein complex 1, gamma 1 subunit [Source:HGNC Symbol;Acc:555]|18|ENSBTAG00000002769|ENSBTAT00000003599	380728	245661	365385	321195
ENSBTAP00000004337	1	1	17.63	45986	0.643486	1.00844	DOK2	DOK2|UniProtKB Gene Name|Bos taurus docking protein 2, 56kDa (DOK2), mRNA. [Source:RefSeq mRNA;Acc:NM_001102002]|8|ENSBTAG00000003341|ENSBTAT00000004337	4814.51	3098.07	5929.46	5979.53
ENSBTAP00000010269	2	2	85.28	13058	0.643435	0.678582	MTPN	MTPN|UniProtKB Gene Name|Bos taurus myotrophin (MTPN), mRNA. [Source:RefSeq mRNA;Acc:NM_203362]|4|ENSBTAG00000007806|ENSBTAT00000010269	757313	487282	809601	549381
ENSBTAP00000031070	13	13	634.4	53078	0.642501	1.05593	CNDP2	CNDP2|UniProtKB Gene Name|Bos taurus CNDP dipeptidase 2 (metallopeptidase M20 family) (CNDP2), mRNA. [Source:RefSeq mRNA;Acc:NM_001035108]|24|ENSBTAG00000009841|ENSBTAT00000031107	4.37132e+06	2.80858e+06	2.03169e+06	2.14532e+06
ENSBTAP00000031949	2	2	204.68	16676	0.641179	0.819047	PPP1R14A	PPP1R14A|EntrezGene|Bos taurus protein phosphatase 1, regulatory (inhibitor) subunit 14A (PPP1R14A), mRNA. [Source:RefSeq mRNA;Acc:NM_001193070]|18|ENSBTAG00000023472|ENSBTAT00000032005	344977	221192	632136	517749
ENSBTAP00000006755	4	4	167.52	49474	0.637897	0.646041	KNG1	KNG1|UniProtKB Gene Name|Bos taurus kininogen 1 (KNG1), transcript variant I, mRNA. [Source:RefSeq mRNA;Acc:NM_175774]|1|ENSBTAG00000005122|ENSBTAT00000006755	321854	205309	79949.9	51650.9
ENSBTAP00000006167	8	8	234.86	168953	0.633964	1.13731	A2M	A2M|UniProtKB Gene Name|Bos taurus alpha-2-macroglobulin (A2M), mRNA. [Source:RefSeq mRNA;Acc:NM_001109795]|5|ENSBTAG00000018137|ENSBTAT00000006167	542695	344049	516683	587630
ENSBTAP00000004959	13	13	513.1	59254	0.628781	0.68604	ECM1	ECM1|UniProtKB Gene Name|Bos taurus extracellular matrix protein 1 (ECM1), mRNA. [Source:RefSeq mRNA;Acc:NM_001099706]|3|ENSBTAG00000003806|ENSBTAT00000004959	4.4472e+06	2.79631e+06	4.33814e+06	2.97614e+06
ENSBTAP00000014735	1	1	14.5	52687	0.627208	0	CTSC	CTSC|EntrezGene|Bos taurus cathepsin C (CTSC), mRNA. [Source:RefSeq mRNA;Acc:NM_001033617]|29|ENSBTAG00000011100|ENSBTAT00000014735	31159.2	19543.3	0	0
ENSBTAP00000049498	4	4	142.24	22096	0.618519	0.62334	GP1BB	GP1BB|HGNC Symbol|glycoprotein Ib (platelet), beta polypeptide [Source:HGNC Symbol;Acc:4440]|17|ENSBTAG00000039059|ENSBTAT00000055945	2.42767e+06	1.50156e+06	2.09994e+06	1.30898e+06
ENSBTAP00000028315	1	1	47.92	27214	0.612395	0.334723	LAT	LAT|HGNC Symbol|linker for activation of T cells [Source:HGNC Symbol;Acc:18874]|25|ENSBTAG00000021249|ENSBTAT00000028315	81154	49698.3	200128	66987.4
ENSBTAP00000022991	2	2	111.61	23429	0.610641	0.968835	AGP	AGP|UniProtKB Gene Name|Bos taurus orosomucoid 1 (ORM1), mRNA. [Source:RefSeq mRNA;Acc:NM_001040502]|8|ENSBTAG00000017294|ENSBTAT00000022991	547318	334215	322003	311968
ENSBTAP00000008518	1	1	14.26	176199	0.608578	0.736758	AGL	AGL|HGNC Symbol|amylo-alpha-1, 6-glucosidase, 4-alpha-glucanotransferase [Source:HGNC Symbol;Acc:321]|3|ENSBTAG00000006491|ENSBTAT00000008518	111443	67822	85867.9	63263.9
ENSBTAP00000024007;ENSBTAP00000008517	6	5	346.1	46310	0.608138	0.638936	PIP4K2A	PIP4K2A|HGNC Symbol|phosphatidylinositol-5-phosphate 4-kinase, type II, alpha [Source:HGNC Symbol;Acc:8997]|13|ENSBTAG00000018033|ENSBTAT00000024007	936975	569810	800957	511761
ENSBTAP00000004664	1	1	24.9	33772	0.600968	0.810936	CD47	CD47|UniProtKB Gene Name|Bos taurus CD47 molecule (CD47), mRNA. [Source:RefSeq mRNA;Acc:NM_174708]|1|ENSBTAG00000003585|ENSBTAT00000004664	99759.2	59952.1	81521.7	66108.8
ENSBTAP00000010500	1	1	14.49	131711	0.59682	1.20966	HEPHL1	HEPHL1|EntrezGene|Bos taurus hephaestin-like 1 (HEPHL1), mRNA. [Source:RefSeq mRNA;Acc:NM_001192511]|29|ENSBTAG00000022960|ENSBTAT00000010500	56987	34010.9	399982	483844
ENSBTAP00000000755	1	1	16.44	63921	0.595458	0.48626	ABHD16A	ABHD16A|EntrezGene|Bos taurus abhydrolase domain containing 16A (ABHD16A), mRNA. [Source:RefSeq mRNA;Acc:NM_001075605]|23|ENSBTAG00000000578|ENSBTAT00000000755	2916.96	1736.93	4232.61	2058.15
ENSBTAP00000009406	8	7	358.05	71886	0.593889	1.94365	F2	F2|UniProtKB Gene Name|Bos taurus coagulation factor II (thrombin) (F2), mRNA. [Source:RefSeq mRNA;Acc:NM_173877]|15|ENSBTAG00000007148|ENSBTAT00000009406	2.21713e+06	1.31673e+06	1.66147e+06	3.22931e+06
ENSBTAP00000019803	3	3	130.12	28028	0.592181	1.00406	CAPNS1	CAPNS1|UniProtKB Gene Name|Bos taurus calpain, small subunit 1 (CAPNS1), mRNA. [Source:RefSeq mRNA;Acc:NM_174261]|18|ENSBTAG00000014872|ENSBTAT00000019803	470481	278610	271707	272811
ENSBTAP00000012939	3	3	137.87	11866	0.591336	0.326548	CXCL6	CXCL6|UniProtKB Gene Name|Bos taurus chemokine (C-X-C motif) ligand 6 (granulocyte chemotactic protein 2) (CXCL6), mRNA. [Source:RefSeq mRNA;Acc:NM_174300]|6|ENSBTAG00000009812|ENSBTAT00000012939	7.56952e+06	4.47613e+06	4.72128e+06	1.54172e+06
ENSBTAP00000002691;ENSBTAP00000052045	8	8	498.2	31843	0.584472	0.832391	MARCKS	MARCKS|EntrezGene|Bos taurus myristoylated alanine-rich protein kinase C substrate (MARCKS), mRNA. [Source:RefSeq mRNA;Acc:NM_001076276]|9|ENSBTAG00000002082|ENSBTAT00000002691	2.23724e+06	1.30761e+06	691249	575389
ENSBTAP00000023029	1	1	46.48	11776	0.580857	0.740776	SUMO3	SUMO3|UniProtKB Gene Name|Bos taurus SMT3 suppressor of mif two 3 homolog 3 (S. cerevisiae) (SUMO3), mRNA. [Source:RefSeq mRNA;Acc:NM_001076449]|1|ENSBTAG00000017321|ENSBTAT00000023029	137907	80104.3	104728	77579.9
ENSBTAP00000035448	3	3	84.58	26336	0.577822	0.981349	UCHL3	UCHL3|UniProtKB Gene Name|Bos taurus ubiquitin carboxyl-terminal esterase L3 (ubiquitin thiolesterase) (UCHL3), mRNA. [Source:RefSeq mRNA;Acc:NM_001040541]|12|ENSBTAG00000008024|ENSBTAT00000035577	367516	212359	179193	175850
ENSBTAP00000012977	1	1	44.73	44316	0.575449	1.07686	CYR61	CYR61|UniProtKB Gene Name|Bos taurus cysteine-rich, angiogenic inducer, 61 (CYR61), mRNA. [Source:RefSeq mRNA;Acc:NM_001034340]|3|ENSBTAG00000009844|ENSBTAT00000012977	58231.5	33509.2	32938.8	35470.4
ENSBTAP00000010674	1	1	20.27	19272	0.565377	0.281464	CD99	CD99|HGNC Symbol|CD99 molecule [Source:HGNC Symbol;Acc:7082]|X|ENSBTAG00000008114|ENSBTAT00000010674	58216.1	32914.1	7915.01	2227.79
ENSBTAP00000001271	1	1	67	33557	0.561508	0.684456	STAP1	STAP1|UniProtKB Gene Name|Bos taurus signal transducing adaptor family member 1 (STAP1), mRNA. [Source:RefSeq mRNA;Acc:NM_001077868]|6|ENSBTAG00000000962|ENSBTAT00000001271	46226.4	25956.5	22577.7	15453.5
ENSBTAP00000033956	2	2	66.77	9571	0.560856	0.506952	FCER1G	FCER1G|UniProtKB Gene Name|Bos taurus Fc fragment of IgE, high affinity I, receptor for; gamma polypeptide (FCER1G), mRNA. [Source:RefSeq mRNA;Acc:NM_174537]|3|ENSBTAG00000024503|ENSBTAT00000034054	388922	218130	261291	132462
ENSBTAP00000006432	16	16	948.18	77168	0.560636	1.2389	TGM3	TGM3|EntrezGene|Bos taurus transglutaminase 3 (E polypeptide, protein-glutamine-gamma-glutamyltransferase) (TGM3), mRNA. [Source:RefSeq mRNA;Acc:NM_001101848]|13|ENSBTAG00000001785|ENSBTAT00000006432	8.32505e+06	4.66732e+06	369757	458094
ENSBTAP00000025484	1	1	23.68	13478	0.559934	2.41606	RPS20	RPS20|UniProtKB Gene Name|Bos taurus ribosomal protein S20 (RPS20), mRNA. [Source:RefSeq mRNA;Acc:NM_001034438]|14|ENSBTAG00000019147|ENSBTAT00000025484	35323.7	19778.9	6354.74	15353.4
ENSBTAP00000026332	1	1	22.53	118825	0.551635	1.20278	IDE	IDE|UniProtKB Gene Name|Bos taurus insulin-degrading enzyme (IDE), mRNA. [Source:RefSeq mRNA;Acc:NM_001075849]|26|ENSBTAG00000019759|ENSBTAT00000026332	40834.6	22525.8	19398.6	23332.4
ENSBTAP00000005102	1	1	14.08	31388	0.550826	0.864754	TSPAN14	TSPAN14|UniProtKB Gene Name|Bos taurus tetraspanin 14 (TSPAN14), mRNA. [Source:RefSeq mRNA;Acc:NM_001046448]|28|ENSBTAG00000003907|ENSBTAT00000005102	47537.1	26184.6	31231.3	27007.4
ENSBTAP00000009564;ENSBTAP00000041939	15	15	775.1	79783	0.538642	0.745495	TF	TF|HGNC Symbol|transferrin [Source:HGNC Symbol;Acc:11740]|1|ENSBTAG00000007273|ENSBTAT00000009564	4.55679e+06	2.45448e+06	4.44304e+06	3.31226e+06
ENSBTAP00000026580	1	1	46.4	66627	0.535347	0.384339	CYBB	CYBB|UniProtKB Gene Name|Bos taurus cytochrome b-245, beta polypeptide (CYBB), mRNA. [Source:RefSeq mRNA;Acc:NM_174035]|X|ENSBTAG00000019953|ENSBTAT00000026580	36114.1	19333.5	10717.3	4119.07
ENSBTAP00000001988	2	1	45.59	47935	0.531575	0.703397	KRT18	KRT18|UniProtKB Gene Name|Bos taurus keratin 18 (KRT18), mRNA. [Source:RefSeq mRNA;Acc:NM_001192095]|5|ENSBTAG00000001517|ENSBTAT00000001988	2.85878e+06	1.51966e+06	1.53856e+06	1.08222e+06
ENSBTAP00000050456	2	2	62.27	25728	0.528012	1.04379	C8G	C8G|UniProtKB Gene Name|Bos taurus complement component 8, gamma polypeptide (C8G), mRNA. [Source:RefSeq mRNA;Acc:NM_001110076]|11|ENSBTAG00000010520|ENSBTAT00000056838	176311	93094.5	189922	198239
ENSBTAP00000000757	1	1	18.62	32855	0.526114	0.700154	LY6G6F	||Bos taurus lymphocyte antigen 6 complex, locus G6F (LY6G6F), mRNA. [Source:RefSeq mRNA;Acc:NM_001076194]|23|ENSBTAG00000000580|ENSBTAT00000000757	39319.8	20686.7	36704.5	25698.8
ENSBTAP00000054571	1	1	38.53	128828	0.52329	0.32036	ITGAM	ITGAM|HGNC Symbol|integrin, alpha M (complement component 3 receptor 3 subunit) [Source:HGNC Symbol;Acc:6149]|25|ENSBTAG00000047238|ENSBTAT00000063617	51782.3	27097.2	20936.7	6707.29
ENSBTAP00000014742	1	1	14.1	220226	0.521361	0.591675	EML6	EML6|HGNC Symbol|echinoderm microtubule associated protein like 6 [Source:HGNC Symbol;Acc:35412]|11|ENSBTAG00000011101|ENSBTAT00000014742	8647.97	4508.72	11069.6	6549.62
ENSBTAP00000002914	5	5	188.37	30258	0.5186	1.0383	APOA1	APOA1|UniProtKB Gene Name|Bos taurus apolipoprotein A-I (APOA1), mRNA. [Source:RefSeq mRNA;Acc:NM_174242]|15|ENSBTAG00000002258|ENSBTAT00000002914	661201	342899	505483	524846
ENSBTAP00000012612	1	1	21.21	98407	0.513134	1.74117	SAPS3	SAPS3|UniProtKB Gene Name|Bos taurus protein phosphatase 6, regulatory subunit 3 (PPP6R3), mRNA. [Source:RefSeq mRNA;Acc:NM_001105372]|29|ENSBTAG00000009584|ENSBTAT00000012612	22827.5	11713.6	16732.5	29134.1
ENSBTAP00000051933	1	1	13.95	34247	0.509998	0.25584	PRSS46	PRSS46|HGNC Symbol|protease, serine, 46 [Source:HGNC Symbol;Acc:37325]|22|ENSBTAG00000038616|ENSBTAT00000053200	947222	483081	1636.8	418.76
ENSBTAP00000053922	6	6	228.13	49604	0.507037	0.927877	LGMN	LGMN|UniProtKB Gene Name|Bos taurus legumain (LGMN), mRNA. [Source:RefSeq mRNA;Acc:NM_174101]|21|ENSBTAG00000046979|ENSBTAT00000065983	2.37276e+06	1.20308e+06	820141	760990
ENSBTAP00000055471;ENSBTAP00000038253	11	5	439.9	63341	0.503393	0.855979	KRT1	KRT1|HGNC Symbol|keratin 1 [Source:HGNC Symbol;Acc:6412]|5|ENSBTAG00000046089|ENSBTAT00000065029	1.017e+07	5.1195e+06	6.67518e+06	5.71381e+06
ENSBTAP00000019737	1	1	15.07	56933	0.501502	0.3747	SLC7A7	SLC7A7|UniProtKB Gene Name|Bos taurus solute carrier family 7 (amino acid transporter light chain, y+L system), member 7 (SLC7A7), mRNA. [Source:RefSeq mRNA;Acc:NM_001075151]|10|ENSBTAG00000014821|ENSBTAT00000019737	901011	451859	1.18127e+06	442624
ENSBTAP00000012258	1	1	21.58	52650	0.465114	2.36823	MORN1	MORN1|HGNC Symbol|MORN repeat containing 1 [Source:HGNC Symbol;Acc:25852]|16|ENSBTAG00000009306|ENSBTAT00000012258	18106.4	8421.56	132390	313529
ENSBTAP00000023373	5	5	178.5	74310	0.462246	1.39588	LMNA	LMNA|HGNC Symbol|lamin A/C [Source:HGNC Symbol;Acc:6636]|3|ENSBTAG00000017574|ENSBTAT00000023373	293637	135732	87773.6	122521
ENSBTAP00000010835	2	2	64.46	30290	0.455904	0.697828	TOLLIP	TOLLIP|UniProtKB Gene Name|Bos taurus toll interacting protein (TOLLIP), mRNA. [Source:RefSeq mRNA;Acc:NM_001039961]|29|ENSBTAG00000008237|ENSBTAT00000010835	83314.9	37983.6	92569.1	64597.3
ENSBTAP00000023743	7	7	438.61	16649	0.441222	0.649095	SRGN	SRGN|HGNC Symbol|serglycin [Source:HGNC Symbol;Acc:9361]|28|ENSBTAG00000017863|ENSBTAT00000023743	9.75542e+06	4.30431e+06	6.43258e+06	4.17535e+06
ENSBTAP00000005074	3	3	184.57	119142	0.433455	0.988746	EMILIN2	EMILIN2|HGNC Symbol|elastin microfibril interfacer 2 [Source:HGNC Symbol;Acc:19881]|24|ENSBTAG00000003880|ENSBTAT00000005074	220918	95757.9	21588.8	21345.8
ENSBTAP00000054280	7	1	299.95	63082	0.427784	0.610118	KRT3	KRT3|HGNC Symbol|keratin 3 [Source:HGNC Symbol;Acc:6440]|5|ENSBTAG00000045662|ENSBTAT00000065713	387721	165861	269534	164448
ENSBTAP00000029240	2	1	105.81	76248	0.417974	1.04378	ALOX12	ALOX12|HGNC Symbol|arachidonate 12-lipoxygenase [Source:HGNC Symbol;Acc:429]|19|ENSBTAG00000021933|ENSBTAT00000029240	203600	85099.5	125996	131512
ENSBTAP00000055977	1	1	27.89	15514	0.416885	1.35713	FABP5	FABP5|HGNC Symbol|fatty acid binding protein 5 (psoriasis-associated) [Source:HGNC Symbol;Acc:3560]|14|ENSBTAG00000047330|ENSBTAT00000065769	118506	49403.2	22632.8	30715.8
ENSBTAP00000017140	9	4	351.81	54987	0.404895	0.7075	KRT10	KRT10|UniProtKB Gene Name|Bos taurus keratin 10 (KRT10), mRNA. [Source:RefSeq mRNA;Acc:NM_174377]|19|ENSBTAG00000020824|ENSBTAT00000017140	4.83886e+06	1.95923e+06	2.42624e+06	1.71656e+06
ENSBTAP00000038262	5	1	267.04	59399	0.390425	0.486561	KRT75	KRT75|UniProtKB Gene Name|Bos taurus keratin 75 (KRT75), mRNA. [Source:RefSeq mRNA;Acc:NM_001076917]|5|ENSBTAG00000016121|ENSBTAT00000038449	52602.8	20537.4	22471.2	10933.6
ENSBTAP00000008319	1	1	37.96	12293	0.381428	0.915808	ATPIF1	ATPIF1|UniProtKB Gene Name|Bos taurus ATPase inhibitory factor 1 (ATPIF1), mRNA. [Source:RefSeq mRNA;Acc:NM_175816]|2|ENSBTAG00000006342|ENSBTAT00000008319	117.416	44.7858	23372.3	21404.5
ENSBTAP00000017446	1	1	51.3	37619	0.373966	1.93008	PLAUR	PLAUR|UniProtKB Gene Name|Bos taurus plasminogen activator, urokinase receptor (PLAUR), mRNA. [Source:RefSeq mRNA;Acc:NM_174423]|18|ENSBTAG00000013125|ENSBTAT00000017446	128534	48067.5	24483.2	47254.6
ENSBTAP00000031506;ENSBTAP00000031243	8	8	589.25	46514	0.37171	0.375926	SERPINB2	SERPINB2|EntrezGene|Bos taurus serpin peptidase inhibitor, clade B (ovalbumin), member 2 (SERPINB2), mRNA. [Source:RefSeq mRNA;Acc:NM_001192051]|24|ENSBTAG00000023198|ENSBTAT00000031553	8.82857e+06	3.28167e+06	1.10775e+06	416431
ENSBTAP00000018438	1	1	17.79	145732	0.36308	1.14713	NEK1	NEK1|HGNC Symbol|NIMA-related kinase 1 [Source:HGNC Symbol;Acc:7744]|8|ENSBTAG00000026915|ENSBTAT00000018438	231097	83906.6	714564	819695
ENSBTAP00000008933	4	1	119.29	61158	0.327476	0.863234	EHD4	EHD4|EntrezGene|Bos taurus EH-domain containing 4 (EHD4), mRNA. [Source:RefSeq mRNA;Acc:NM_001192053]|10|ENSBTAG00000006792|ENSBTAT00000008933	36996.9	12115.6	8258.73	7129.22
ENSBTAP00000013399	2	1	76.16	10502	0.32454	0.762596	REG1	||Bos taurus regakine 1 (LOC504773), mRNA. [Source:RefSeq mRNA;Acc:NM_001034220]|19|ENSBTAG00000010155|ENSBTAT00000013399	86715.2	28142.5	7024.78	5357.07
ENSBTAP00000020009	6	6	211.98	40524	0.319946	0.399596	CD14	CD14|UniProtKB Gene Name|Bos taurus CD14 molecule (CD14), mRNA. [Source:RefSeq mRNA;Acc:NM_174008]|7|ENSBTAG00000015032|ENSBTAT00000020009	2.29835e+06	735348	343383	137214
ENSBTAP00000027749	3	1	159.04	50904	0.315668	1.29735	KRT24	KRT24|EntrezGene|keratin, type I cytoskeletal 24 [Source:RefSeq peptide;Acc:NP_001192390]|19|ENSBTAG00000040279|ENSBTAT00000027749	2.85706e+06	901882	1.0588e+06	1.37363e+06
ENSBTAP00000003129	1	1	26.34	16325	0.294821	1.03897	CYB5B	CYB5B|UniProtKB Gene Name|Bos taurus cytochrome b5 type B (outer mitochondrial membrane) (CYB5B), mRNA. [Source:RefSeq mRNA;Acc:NM_001163782]|18|ENSBTAG00000002412|ENSBTAT00000003129	73422.3	21646.4	45685.1	47465.6
ENSBTAP00000009478;ENSBTAP00000001108	13	6	505.75	60800	0.293298	0.68082	KRT5	KRT5|UniProtKB Gene Name|Bos taurus keratin 5 (KRT5), mRNA. [Source:RefSeq mRNA;Acc:NM_001008663]|5|ENSBTAG00000038384|ENSBTAT00000009478	1.14565e+06	336018	487817	332116
ENSBTAP00000020103	2	1	48.78	334572	0.287837	1.50628	DSP	DSP|HGNC Symbol|desmoplakin [Source:HGNC Symbol;Acc:3052]|23|ENSBTAG00000015106|ENSBTAT00000020103	29388.1	8459	4503.13	6782.98
ENSBTAP00000006189	3	3	122.83	12146	0.282895	0.415731	RETN	RETN|UniProtKB Gene Name|Bos taurus resistin (RETN), mRNA. [Source:RefSeq mRNA;Acc:NM_183362]|7|ENSBTAG00000004716|ENSBTAT00000006189	802998	227164	217126	90266
ENSBTAP00000038121	1	1	39.6	27502	0.274486	0.672661	SIRPA	SIRPA|UniProtKB Gene Name|Bos taurus signal-regulatory protein alpha (SIRPA), mRNA. [Source:RefSeq mRNA;Acc:NM_175788]|13|ENSBTAG00000007213|ENSBTAT00000038306	45988.9	12623.3	7498.12	5043.69
ENSBTAP00000006450;ENSBTAP00000045066	5	1	197.56	43858	0.24765	0.490094	KRT19	KRT19|UniProtKB Gene Name|Bos taurus keratin 19 (KRT19), mRNA. [Source:RefSeq mRNA;Acc:NM_001015600]|19|ENSBTAG00000004905|ENSBTAT00000006450	311178	77063.3	139304	68271.9
ENSBTAP00000027556	24	24	1561.75	80133	0.23683	0.110442	MMP9	MMP9|EntrezGene|Bos taurus matrix metallopeptidase 9 (gelatinase B, 92kDa gelatinase, 92kDa type IV collagenase) (MMP9), mRNA. [Source:RefSeq mRNA;Acc:NM_174744]|13|ENSBTAG00000020676|ENSBTAT00000027556	1.9632e+07	4.64943e+06	5.19574e+07	5.73828e+06
ENSBTAP00000027807	1	1	69.63	39440	0.235062	0.516063	C5AR1	C5AR1|UniProtKB Gene Name|Bos taurus complement component 5a receptor 1 (C5AR1), mRNA. [Source:RefSeq mRNA;Acc:NM_001007810]|18|ENSBTAG00000020872|ENSBTAT00000027807	40392.1	9494.66	47447.8	24486
ENSBTAP00000004927	7	6	206.08	46417	0.22688	0.810803	SERPINA1	SERPINA1|UniProtKB Gene Name|Bos taurus serpin peptidase inhibitor, clade A (alpha-1 antiproteinase, antitrypsin), member 1 (SERPINA1), mRNA. [Source:RefSeq mRNA;Acc:NM_173882]|21|ENSBTAG00000018843|ENSBTAT00000004927	1.31687e+06	298770	504367	408942
ENSBTAP00000023522	1	1	38.4	82510	0.200907	1.40929	JUP	JUP|UniProtKB Gene Name|Bos taurus junction plakoglobin (JUP), mRNA. [Source:RefSeq mRNA;Acc:NM_001004024]|19|ENSBTAG00000017685|ENSBTAT00000023522	46529.7	9348.16	8134.7	11464.2
ENSBTAP00000000396;ENSBTAP00000044069;ENSBTAP00000051695	8	3	349.3	61166	0.195433	0.63521	KRT6A	||Bos taurus keratin 6A (KRT6A), mRNA. [Source:RefSeq mRNA;Acc:NM_001083510]|5|ENSBTAG00000039425|ENSBTAT00000000396	2.17563e+06	425190	600455	381415
ENSBTAP00000036252;ENSBTAP00000008948;ENSBTAP00000020622;ENSBTAP00000000746;ENSBTAP00000010255;ENSBTAP00000056163	15	8	710.49	52164	0.189226	0.667594	KRT14	KRT14|EntrezGene|Bos taurus keratin 14 (KRT14), mRNA. [Source:RefSeq mRNA;Acc:NM_001166575]|19|ENSBTAG00000007583|ENSBTAT00000036393	4.08382e+06	772764	1.44443e+06	964292
ENSBTAP00000041643	1	1	48.46	37518	0.187961	0.883389	SH3GLB1	SH3GLB1|EntrezGene|Bos taurus SH3-domain GRB2-like endophilin B1 (SH3GLB1), mRNA. [Source:RefSeq mRNA;Acc:NM_001077993]|3|ENSBTAG00000031171|ENSBTAT00000044128	41190.7	7742.24	23541	20795.9
ENSBTAP00000000673	7	7	361.67	39193	0.0978107	0.679	AHSG	AHSG|UniProtKB Gene Name|Bos taurus alpha-2-HS-glycoprotein (AHSG), mRNA. [Source:RefSeq mRNA;Acc:NM_173984]|1|ENSBTAG00000000522|ENSBTAT00000000673	5.79515e+06	566828	877894	596090
ENSBTAP00000016977;ENSBTAP00000040510	2	2	62.94	108483	0.0944879	0.218699	CSF1R	CSF1R|UniProtKB Gene Name|Bos taurus colony stimulating factor 1 receptor (CSF1R), mRNA. [Source:RefSeq mRNA;Acc:NM_001075403]|7|ENSBTAG00000012771|ENSBTAT00000016977	214207	20239.9	21112.4	4617.27
ENSBTAP00000013354	1	1	39.38	36074	0.0769623	0.604532	APOE	APOE|UniProtKB Gene Name|Bos taurus apolipoprotein E (APOE), mRNA. [Source:RefSeq mRNA;Acc:NM_173991]|18|ENSBTAG00000010123|ENSBTAT00000013354	93081.8	7163.79	17814.9	10769.7
ENSBTAP00000019848	2	2	72.44	371807	0.0496221	0.0464573	VCAN	VCAN|HGNC Symbol|versican [Source:HGNC Symbol;Acc:2464]|7|ENSBTAG00000014906|ENSBTAT00000019848	184260	9143.37	25530	1186.05
ENSBTAP00000012519	8	8	431.67	72834	0.0357983	0.643849	TGFBI	TGFBI|EntrezGene|Bos taurus transforming growth factor, beta-induced, 68kDa (TGFBI), mRNA. [Source:RefSeq mRNA;Acc:NM_001205402]|7|ENSBTAG00000009513|ENSBTAT00000012519	2.31198e+06	82765	49015.4	31558.5
ENSBTAP00000011924	2	2	112.4	56642	0.0313074	0.00906043	MMP19	MMP19|UniProtKB Gene Name|Bos taurus matrix metallopeptidase 19 (MMP19), mRNA. [Source:RefSeq mRNA;Acc:NM_001075983]|5|ENSBTAG00000009051|ENSBTAT00000011924	439937	13773.3	6367.01	57.6878
ENSBTAP00000026215	3	3	83.15	126004	0.023566	0.526914	CD163	CD163|UniProtKB Gene Name|Bos taurus CD163 molecule (CD163), mRNA. [Source:RefSeq mRNA;Acc:NM_001163413]|5|ENSBTAG00000019669|ENSBTAT00000026215	116111	2736.28	4058.45	2138.46
ENSBTAP00000005068	1	1	38.41	43128	0	0	SERPINB13	SERPINB13|HGNC Symbol|serpin peptidase inhibitor, clade B (ovalbumin), member 13 [Source:HGNC Symbol;Acc:8944]|24|ENSBTAG00000035182|ENSBTAT00000005068	50620	0	0	0
ENSBTAP00000015499;ENSBTAP00000055553	5	1	164.99	21343	0	0	HIST1H1C	HIST1H1C|UniProtKB Gene Name|Bos taurus histone cluster 1, H1c (HIST1H1C), mRNA. [Source:RefSeq mRNA;Acc:NM_001083425]|23|ENSBTAG00000011677|ENSBTAT00000015499	51657.8	0	0	0
ENSBTAP00000024127	1	1	18.25	109689	0	0	KIF5C	KIF5C|HGNC Symbol|kinesin family member 5C [Source:HGNC Symbol;Acc:6325]|2|ENSBTAG00000018125|ENSBTAT00000024127	5418.53	0	0	0
