# Supplementary material for: Bovine Peripheral Blood Derived Lymphocyte Proteome and Secretome Show Divergent Reaction of Bovine Immune Phenotypes after Stimulation with Pokeweed Mitogen
Source: Proteomes. 2022 Feb 8;10(1):7. doi: 10.3390/proteomes10010007 (PMC8883952; doi:10.3390/proteomes10010007)
Supplement: Supplementary file 1 [file proteomes-10-00007-s001.zip › Table S5_identified proteins of secretome dataset_ratio2 p005_Kleinwort et al.xlsx]

## Sheet: Supl Tab 5
Supplemental Table S5: Proteins identified in secretome mass spectrometry dataset with biologically relevant fold changes (ratio ≥ 2) after PWM stimulation in lymphocytes of both immune phenotypes (1), exclusively in control lymphocytes (2) or exclusively in lymphocytes of ID cows (3). (a) Protein names as listed in Ensembl protein database v3.0 (http://www.ensembl.org). Names illustrated in bold…
1) Up in controls and immune deviants
Description a	Gene Symbol b	Protein ID c	Unique Peptides d	Ratio Ctr (PWM/unstim) e	Ratio Ctr (PWM/unstim) f
Chemokine (C-C motif) ligand 5	CCL5	ENSBTAP00000009463	3	36.4	2.0
Inhibin beta A	INHBA	ENSBTAP00000003783	4	27.4	11.3
Interleukin 2	IL2	ENSBTAP00000027819	2	17.3	30.5
GB1/RHD3-type G domain-containing protein	GBP1	ENSBTAP00000032626	2	16.5	3.0
Indoleamine 23-dioxygenase 1	IDO1	ENSBTAP00000027449	4	15.1	5.2
Granzyme A	GZMA	ENSBTAP00000029273	2	14.4	15.0
Protein-glutamine gamma-glutamyltransferase 2	TGM2	ENSBTAP00000021569	6	13.9	2.3
Nitric oxide synthase 2 inducible	NOS2	ENSBTAP00000009062	4	10.8	4.6
Intercellular adhesion molecule 1	ICAM1	ENSBTAP00000013608	2	8.9	7.7
Interferon gamma	IFNG	ENSBTAP00000016634	3	5.0	177.6
Inorganic pyrophosphatase	PPA1	ENSBTAP00000010311	6	3.7	4.2
Tryptophanyl-tRNA synthetase	WARS1	ENSBTAP00000006139	10	3.4	2.9
Lactotransferrin	LTF	ENSBTAP00000001704	2	3.0	2.0
Pentraxin-related protein PTX3	PTX3	ENSBTAP00000011863	4	2.7	3.1
L-serine dehydratase/L-threonine deaminase	SDS	ENSBTAP00000042524	9	2.6	3.8
Nucleobindin 2	NUCB2	ENSBTAP00000023221	5	2.0	2.4
2) Up in controls
Description a	Gene Symbol b	Protein ID c	Unique Peptides d	Ratio Ctr (PWM/unstim) e	Ratio Ctr (PWM/unstim) f
Interstitial collagenase	MMP1	ENSBTAP00000021014	4	7.4	0.8
Interleukin 17A	IL17A	ENSBTAP00000002786	3	7.1	1.4
ZnMc domain-containing protein	MMP3	ENSBTAP00000013124	6	6.8	0.4
Interleukin 8	CXCL8	ENSBTAP00000026275	5	6.2	0.8
Growth-regulated protein homolog beta	CXCL1	ENSBTAP00000022366	2	6.2	1.3
Growth-regulated protein homolog gamma	CXCL2	ENSBTAP00000039327	3	4.8	0.9
Cathelicidin-1	CAMP	ENSBTAP00000026750	5	4.2	1.8
GLOBIN domain-containing protein	HBA1	ENSBTAP00000022034	8	3.3	0.9
Peptidoglycan recognition protein 1	PGLYRP1	ENSBTAP00000003414	3	3.0	1.6
Armadillo repeat containing 10	ARMC10	ENSBTAP00000018822	2	2.8	0.7
Carbonic anhydrase II	CA2	ENSBTAP00000023581	6	2.8	0.8
Hemoglobin beta	HBB	ENSBTAP00000043063	16	2.7	0.8
Anion exchange protein	SLC4A1	ENSBTAP00000002081	5	2.7	0.8
Cathelicidin 6	CAMP	ENSBTAP00000042250	2	2.6	1.7
Uridine phosphorylase 1	UPP1	ENSBTAP00000011088	2	2.6	1.9
Golgi glycoprotein 1	GLG1	ENSBTAP00000002972	2	2.5	1.1
Interleukin 17F	IL17F	ENSBTAP00000022393	3	2.5	0.8
Lysozyme C. non-stomach isozyme	LYZ	ENSBTAP00000038081	4	2.5	1.2
Interleukin 1 receptor antagonist	IL1RN	ENSBTAP00000026209	2	2.1	0.5
Eukaryotic translation initiation factor 4 gamma 1	EIF4G1	ENSBTAP00000032150	2	2.0	1.4
Lipocalin 2	LCN2	ENSBTAP00000018806	2	2.0	1.7
Lupus La protein homolog	SSB	ENSBTAP00000011484	4	2.0	1.8
3) Up in immune deviants
Description a	Gene Symbol b	Protein ID c	Unique Peptides d	Ratio Ctr (PWM/unstim) e	Ratio Ctr (PWM/unstim) f
40S ribosomal protein S7	RPS7	ENSBTAP00000021587	2	1.5	4.0
60S ribosomal protein L3	RPL3	ENSBTAP00000004188	2	1.7	3.4
Splicing factor 3b subunit 1	SF3B1	ENSBTAP00000011734	2	1.0	3.3
Nucleobindin 1	NUCB1	ENSBTAP00000003073	7	1.9	2.9
Protein arginine methyltransferase 1	PRMT1	ENSBTAP00000008734	2	1.8	2.7
60S ribosomal protein L5	RPL5	ENSBTAP00000002626	2	1.0	2.7
Cathepsin B	CTSB	ENSBTAP00000036650	8	1.5	2.7
Heterogeneous nuclear ribonucleoprotein M	HNRNPM	ENSBTAP00000011559	2	0.8	2.5
Xanthine dehydrogenase/oxidase	XDH	ENSBTAP00000016620	3	0.7	2.5
Alanyl-tRNA synthetase	AARS1	ENSBTAP00000026393	2	1.5	2.4
60S ribosomal protein L18a	RPL18A	ENSBTAP00000021033	2	1.3	2.4
40S ribosomal protein S8	RPS8	ENSBTAP00000020326	3	1.2	2.4
40S ribosomal protein S5	RPS5	ENSBTAP00000021268	2	1.3	2.4
40S ribosomal protein S9	RPS9	ENSBTAP00000008502	3	1.5	2.4
Eukaryotic initiation factor 4A-I	EIF4A1	ENSBTAP00000000144	6	1.2	2.3
60S ribosomal protein L27	RPL27	ENSBTAP00000023183	3	0.9	2.3
25A_SYNTH_3 domain-containing protein	OAS1	ENSBTAP00000002019	3	1.2	2.3
60S ribosomal protein L18	RPL18	ENSBTAP00000020452	4	1.2	2.3
60S ribosomal protein L6	RPL6	ENSBTAP00000042411	2	1.1	2.2
60S ribosomal protein L30	RPL30	ENSBTAP00000021651	3	1.4	2.2
60S ribosomal protein L7a	RPL7A	ENSBTAP00000015358	3	1.1	2.1
Major vault protein	MVP	ENSBTAP00000010451	5	1.0	2.1
Heterogeneous nuclear ribonucleoprotein R	HNRNPR	ENSBTAP00000022054	3	1.4	2.1
Synaptotagmin binding cytoplasmic RNA interacting protein	SYNCRIP	ENSBTAP00000008774	5	1.5	2.1
Actin-related protein 2/3 complex subunit 3	ARPC3	ENSBTAP00000007028	2	1.0	2.0
Sulfotransferase 1A1	SULT1A1	ENSBTAP00000011388	2	0.7	2.0
Heterogeneous nuclear ribonucleoprotein A3	HNRNPA3	ENSBTAP00000028757	2	1.2	2.0
60S ribosomal protein L14	RPL14	ENSBTAP00000002642	2	1.0	2.0
Coronin 7	CORO7	ENSBTAP00000012121	5	1.5	2.0
40S ribosomal protein S10	RPS10	ENSBTAP00000020719	2	1.8	2.0
Core histone macro-H2A	MACROH2A1	ENSBTAP00000021436	7	1.3	2.0
