# Supplementary material for: Bovine Peripheral Blood Derived Lymphocyte Proteome and Secretome Show Divergent Reaction of Bovine Immune Phenotypes after Stimulation with Pokeweed Mitogen
Source: Proteomes. 2022 Feb 8;10(1):7. doi: 10.3390/proteomes10010007 (PMC8883952; doi:10.3390/proteomes10010007)
Supplement: Supplementary file 1 [file proteomes-10-00007-s001.zip › Table S6_secretome data pathway enrichment analysis_Kleinwort et al.xlsx]

## Sheet: Suppl Tab 6
Supplemental Table S6: Pathway enrichment analysis of secretome dataset. Functional enrichment showing 10 most significant categories of biological processes (GO terms). Hierarchical clustering was performed with ShinyGO software v0.741 using human orthologue gene names of higher abundant secretome proteins after PWM stimulation of lymphocytes from controls and immune deviant cows. Table shows da…
1) Up in controls
Enrichment FDR a	Biological process b	Genes in list c	Total genes d	Genes e
1.36507e-11	Antimicrobial humoral response	9	166	CXCL2 CXCL1 CAMP CXCL8 PGLYRP1 IL17A IL17F LYZ LCN2
8.30195e-10	Antimicrobial humoral immune response mediated by antimicrobial peptide	7	92	CXCL2 CXCL1 CAMP CXCL8 PGLYRP1 IL17A IL17F
2.34124e-09	Humoral immune response	9	331	CXCL2 CXCL1 CAMP CXCL8 PGLYRP1 IL17A IL17F LYZ LCN2
1.72972e-06	Response to stress	17	4769	HBB PGLYRP1 CXCL2 LYZ IL1RN CXCL1 CAMP CXCL8 IL17A LCN2 HBA2 SLC4A1 CA2 IL17F EIF4G1 UPP1 MMP3
1.72972e-06	Response to bacterium	9	741	PGLYRP1 CXCL2 LYZ CXCL1 CAMP CXCL8 LCN2 IL17A IL17F
6.1969e-06	Immune system process	15	3752	CXCL2 IL1RN CXCL1 CAMP CXCL8 PGLYRP1 IL17A SLC4A1 CA2 IL17F LCN2 LYZ GLG1 MMP1 HBB
8.44784e-06	Inflammatory response	9	950	CXCL2 IL1RN CXCL1 CXCL8 IL17A PGLYRP1 IL17F LYZ MMP3
8.44784e-06	Bicarbonate transport	4	42	SLC4A1 CA2 HBA2 HBB
8.44784e-06	Cytokine-mediated signaling pathway	9	965	CXCL2 IL1RN CXCL1 CXCL8 IL17A IL17F LCN2 MMP3 MMP1
8.44784e-06	Cellular response to cytokine stimulus	10	1308	CXCL2 IL1RN CXCL1 CXCL8 IL17A IL17F LCN2 CAMP MMP3 MMP1
2) Up in immune deviants
Enrichment FDR a	Biological process b	Genes in list c	Total genes d	Genes e
1.09806e-23	Cytoplasmic translation	16	169	RPL6 EIF4A1 RPL18 RPS5 RPL3 RPL18A RPL5 RPS10 RPL27 RPS8 RPL30 RPS7 RPL14 RPS9 RPL7A AARS1
2.54201e-22	SRP-dependent cotranslational protein targeting to membrane	14	112	RPL18 RPS5 RPL6 RPL3 RPL18A RPL5 RPS10 RPL27 RPS8 RPL30 RPS7 RPL14 RPS9 RPL7A
3.66474e-22	Cotranslational protein targeting to membrane	14	118	RPL18 RPS5 RPL6 RPL3 RPL18A RPL5 RPS10 RPL27 RPS8 RPL30 RPS7 RPL14 RPS9 RPL7A
9.09733e-22	Protein targeting to ER	14	128	RPL18 RPS5 RPL6 RPL3 RPL18A RPL5 RPS10 RPL27 RPS8 RPL30 RPS7 RPL14 RPS9 RPL7A
1.14273e-21	Establishment of protein localization to endoplasmic reticulum	14	132	RPL18 RPS5 RPL6 RPL3 RPL18A RPL5 RPS10 RPL27 RPS8 RPL30 RPS7 RPL14 RPS9 RPL7A
4.58451e-21	Nuclear-transcribed mRNA catabolic process, nonsense-mediated decay	14	147	RPL18 RPS5 RPL6 RPL3 RPL18A RPL5 RPS10 RPL27 RPS8 RPL30 RPS7 RPL14 RPS9 RPL7A
1.61065e-20	Protein localization to endoplasmic reticulum	14	162	RPL18 RPS5 RPL6 RPL3 RPL18A RPL5 RPS10 RPL27 RPS8 RPL30 RPS7 RPL14 RPS9 RPL7A
2.19326e-20	Translational initiation	15	229	EIF4A1 RPS5 RPL18 RPL6 RPL3 RPL18A RPL5 RPS10 RPL27 RPS8 RPL30 RPS7 RPL14 RPS9 RPL7A
8.38177e-19	Viral transcription	14	217	RPL18 RPS5 RPL6 RPL3 RPL18A RPL5 RPS10 RPL27 RPS8 RPL30 RPS7 RPL14 RPS9 RPL7A
3.36468e-18	Protein targeting to membrane	14	241	RPL18 RPS5 RPL6 RPL3 RPL18A RPL5 RPS10 RPL27 RPS8 RPL30 RPS7 RPL14 RPS9 RPL7A
3) Up in controls and immune deviants
Enrichment FDR a	Biological process b	Genes in list c	Total genes d	Genes e
4.32546e-05	Regulation of programmed cell death	10	1684	GZMA ICAM1 IL2 IFNG INHBA HEL-S-45 CCL5 NOS2 IDO1 LTF
4.8337e-05	Regulation of cell death	10	1847	GZMA ICAM1 IL2 IFNG INHBA HEL-S-45 CCL5 NOS2 IDO1 LTF
4.8337e-05	Modulation of process of other organism	5	168	PTX3 IFNG CCL5 NOS2 LTF
5.28424e-05	Positive regulation of programmed cell death	7	640	GZMA IFNG INHBA CCL5 HEL-S-45 NOS2 IDO1
5.3351e-05	Regulation of catalytic activity	11	2697	NOS2 GZMA CCL5 LTF IFNG WARS1 PTX3 NUCB2 ICAM1 IL2 HEL-S-45
6.27397e-05	Nitric oxide biosynthetic process	4	84	NOS2 IFNG ICAM1 PTX3
6.27397e-05	Defense response	10	2221	NOS2 LTF GBP1 PTX3 CCL5 IL2 IFNG ICAM1 HEL-S-45 INHBA
6.27397e-05	Positive regulation of cell death	7	710	GZMA IFNG INHBA CCL5 HEL-S-45 NOS2 IDO1
6.27397e-05	Regulation of apoptotic process	9	1639	GZMA ICAM1 IL2 IFNG INHBA HEL-S-45 CCL5 IDO1 LTF
6.27397e-05	Nitric oxide metabolic process	4	89	NOS2 IFNG ICAM1 PTX3
